# Supplementary material for: Pregnancy-specific responses to COVID-19 are revealed by high-throughput proteomics of human plasma
Source: Research Square preprint supplement (doi:10.21203/rs.3.rs-1906806/v1), 2022-08-22
Supplement: Supplementary file 1 [file 18d7b14b3142add734391fce.xlsx]

## Sheet: TableS4_
Supplementary Table 3. Biological processes enriched among differentially regulated proteins in pregnant women with COVID-19.
Biological process	Count	Size	OddsRatio	q	Pvalue	Genes
response to external stimulus	201	1408	1.7	0	6.15879e-08	ISG15,MX1,ZBP1,IFIT3,C1QC,GBP1,MAP2K4,LAG3,LGALS9,B2M,CAT,IFNL1,CXCL10,SAA1,C9,IFI16,DDX58,CD14,TLR5,CPB2,TNFRSF1B,MPO,H2BC21,H2BC12,RELN,FLRT2,DHX58,PSMA2,KLKB1,GHR,PGLYRP2,MDK,CSF1,HP,PSMB4,CD226,VIM,RTP4,SERPING1,HRG,EPHA4,SEMA4A,PLA2G2A,CXCL11,CLPSL1,GFRA3,PRTN3,EPHA10,CTSG,HMOX1,FOLR2,VSIG4,PLA2G7,NPPA,NMI,DCPS,KLK8,UNC5D,CR1,EFNB3,CLEC7A,SIRT2,LBP,TNFRSF10B,TNFRSF11B,DCTPP1,STAT1,TREM1,BSG,…
extracellular matrix organization	40	162	3	0	9.46672e-08	LCP1,CPB2,TNFRSF1B,COL11A2,FLRT2,TLL1,ANTXR1,CTSG,NID2,MMP17,TNFRSF11B,DDR2,NID1,MMP2,DDR1,TNXB,VWA1,LUM,CTSV,FAP,COMP,FMOD,SMOC2,VIT,TPSAB1,FURIN,COL10A1,COL15A1,APLP1,MIA,KLK7,CCN1,POSTN,SMOC1,FGFR4,MMP12,ELANE,IBSP,BMP1,SPINT1
extracellular structure organization	40	162	3	0	9.46672e-08	LCP1,CPB2,TNFRSF1B,COL11A2,FLRT2,TLL1,ANTXR1,CTSG,NID2,MMP17,TNFRSF11B,DDR2,NID1,MMP2,DDR1,TNXB,VWA1,LUM,CTSV,FAP,COMP,FMOD,SMOC2,VIT,TPSAB1,FURIN,COL10A1,COL15A1,APLP1,MIA,KLK7,CCN1,POSTN,SMOC1,FGFR4,MMP12,ELANE,IBSP,BMP1,SPINT1
external encapsulating structure organization	40	164	2.9	0	1.35564e-07	LCP1,CPB2,TNFRSF1B,COL11A2,FLRT2,TLL1,ANTXR1,CTSG,NID2,MMP17,TNFRSF11B,DDR2,NID1,MMP2,DDR1,TNXB,VWA1,LUM,CTSV,FAP,COMP,FMOD,SMOC2,VIT,TPSAB1,FURIN,COL10A1,COL15A1,APLP1,MIA,KLK7,CCN1,POSTN,SMOC1,FGFR4,MMP12,ELANE,IBSP,BMP1,SPINT1
biological adhesion	131	870	1.7	0.001	1.74139e-06	GBP1,LAG3,LGALS9,B2M,IFNL1,CDON,SAA1,AZGP1,LRRC4C,SIGLEC7,CDH20,RELN,FLRT2,ANTXR1,MDK,CSF1,CD226,BMP10,LRRC15,CLSTN3,HRG,EPHA4,FOLR2,VSIG4,NID2,UNC5D,CR1,EFNB3,MERTK,BSG,HAVCR2,CNTN1,FBLN7,KNG1,APOA4,DSC2,VWC2,PRKCZ,DDR2,NID1,SERPINB8,CD74,DDR1,IL12RB1,LGALS3BP,APOA1,NPTN,KITLG,IL1RN,CDH17,ITGB7,EPHB2,CNTN6,EFNB2,CDSN,LILRB2,TNXB,TNFSF13B,CNTN4,CD300A,ADAM23,SLITRK1,ITGAV,BOC,ENTPD1,PCDH12,CDH3,O…
cell adhesion	129	863	1.7	0.002	3.20167e-06	GBP1,LAG3,LGALS9,B2M,IFNL1,CDON,SAA1,AZGP1,LRRC4C,SIGLEC7,CDH20,RELN,FLRT2,ANTXR1,MDK,CSF1,CD226,BMP10,CLSTN3,HRG,EPHA4,FOLR2,VSIG4,NID2,UNC5D,CR1,EFNB3,MERTK,BSG,HAVCR2,CNTN1,FBLN7,KNG1,APOA4,DSC2,VWC2,PRKCZ,DDR2,NID1,SERPINB8,CD74,DDR1,IL12RB1,LGALS3BP,APOA1,NPTN,KITLG,IL1RN,CDH17,ITGB7,EPHB2,CNTN6,EFNB2,CDSN,LILRB2,TNXB,TNFSF13B,CNTN4,CD300A,ADAM23,SLITRK1,ITGAV,BOC,ENTPD1,PCDH12,CDH3,OMG,RASA…
defense response	133	903	1.6	0.002	4.86869e-06	ISG15,MX1,ZBP1,IFIT3,C1QC,GBP1,LAG3,LGALS9,IFNL1,CXCL10,CD300C,SAA1,C9,IFI16,DDX58,CD14,TLR5,TNFRSF1B,MPO,LILRA1,H2BC21,H2BC12,SAA2,DHX58,KLKB1,SERPINA3,PGLYRP2,MDK,CSF1,HP,PSMB4,CD226,VIM,IL18R1,RTP4,SERPING1,HRG,PLA2G2A,CXCL11,CTSG,HMOX1,FOLR2,VSIG4,CD48,PLA2G7,NPPA,NMI,CR1,CLEC7A,SIRT2,LBP,STAT1,TREM1,HAVCR2,CCL17,AIMP1,COLEC12,KNG1,IL22RA1,APOA4,PRKCZ,C4A,CFP,CD74,CR2,IL12RB1,LGALS3BP,FCGR1A,…
trans-synaptic signaling, modulating synaptic transmission	5	5	Inf	0.004	1.18105e-05	EFNB3,NTRK2,NPTN,EPHB2,PLAT
immune response	137	954	1.6	0.004	1.34652e-05	ISG15,MX1,ZBP1,IFIT3,C1QC,GBP1,MAP2K4,LAG3,LGALS9,B2M,IFNL1,CXCL10,HSPA1A,C9,LCP1,AZGP1,IFI16,DDX58,CD14,TLR5,TNFRSF1B,MPO,LILRA1,H2BC21,H2BC12,DHX58,PGLYRP2,MDK,CSF1,HP,PSMB4,CD226,VIM,IL18R1,RTP4,SERPING1,HRG,SEMA4A,PLA2G2A,CXCL11,PRTN3,FCRL4,CTSG,HMOX1,VSIG4,CD48,NPPA,NMI,FTH1,LILRA3,CR1,CLEC7A,SIRT2,IGF1R,LBP,STAT1,TREM1,HAVCR2,CCL17,AIMP1,COLEC12,IL22RA1,APOA4,PRKCZ,C4A,CFP,CD74,CR2,IL12RB1,…
neuron recognition	13	34	5.4	0.005	1.66498e-05	CRTAC1,EPHA4,EFNB3,BSG,NPTN,EPHB2,CNTN6,CNTN4,PCDH12,ROBO2,ROBO1,NTM,ROBO4
axon guidance	32	145	2.5	0.006	2.32287e-05	RELN,FLRT2,EPHA4,SEMA4A,GFRA3,EPHA10,UNC5D,EFNB3,BSG,EPHA6,NPTN,UNC5B,EPHB2,CNTN6,EFNB2,CNTN4,BOC,NOG,NTN1,DCC,NRXN3,CHL1,ROBO2,ROBO1,L1CAM,SEMA6A,ROBO4,BMP7,EPHB6,SEMA4G,CXCL12,VASP
neuron projection guidance	32	146	2.5	0.007	2.68933e-05	RELN,FLRT2,EPHA4,SEMA4A,GFRA3,EPHA10,UNC5D,EFNB3,BSG,EPHA6,NPTN,UNC5B,EPHB2,CNTN6,EFNB2,CNTN4,BOC,NOG,NTN1,DCC,NRXN3,CHL1,ROBO2,ROBO1,L1CAM,SEMA6A,ROBO4,BMP7,EPHB6,SEMA4G,CXCL12,VASP
response to vitamin	16	51	4	0.007	3.27581e-05	CAT,CXCL10,FOLR2,DCPS,STC1,BCHE,SOD2,ALAD,ALDH1A2,BMP7,POSTN,HAMP,ARG1,PENK,OTC,EPO
negative regulation of response to external stimulus	46	245	2.1	0.007	3.72978e-05	ISG15,LGALS9,SAA1,IFI16,CPB2,TNFRSF1B,DHX58,KLKB1,MDK,PSMB4,SERPING1,HRG,EPHA4,SEMA4A,VSIG4,NMI,KLK8,CR1,SIRT2,HAVCR2,KNG1,APOA1,APOH,IL22RA2,PLAT,MICB,A2M,FAP,IL2,FURIN,F2,ROBO2,ROBO1,WFDC1,IGF1,ACP5,PROC,SEMA6A,HAMP,MMP12,SEMA4G,SOD1,UBASH3B,ELANE,ARG1,NPLOC4
chemotaxis	64	379	1.8	0.007	3.92426e-05	LGALS9,CXCL10,SAA1,RELN,FLRT2,MDK,CSF1,HRG,EPHA4,SEMA4A,CXCL11,GFRA3,EPHA10,PLA2G7,UNC5D,EFNB3,LBP,TREM1,BSG,CCL17,EPHA6,CD74,APOA1,NPTN,UNC5B,EPHB2,CNTN6,EFNB2,CNTN4,MSMP,ITGAV,BOC,NOG,CCL7,KIT,NTN1,DCC,CCL8,TYMP,NRXN3,CHL1,SMOC2,PLAUR,ROBO2,ROBO1,THBS4,CDH13,BIN2,CCL22,L1CAM,CSF1R,SEMA6A,ROBO4,BMP7,CCN1,EPHB6,CCL14,SEMA4G,S100A9,ELANE,CXCL12,FLT1,VASP,DEFA1
taxis	64	379	1.8	0.007	3.92426e-05	LGALS9,CXCL10,SAA1,RELN,FLRT2,MDK,CSF1,HRG,EPHA4,SEMA4A,CXCL11,GFRA3,EPHA10,PLA2G7,UNC5D,EFNB3,LBP,TREM1,BSG,CCL17,EPHA6,CD74,APOA1,NPTN,UNC5B,EPHB2,CNTN6,EFNB2,CNTN4,MSMP,ITGAV,BOC,NOG,CCL7,KIT,NTN1,DCC,CCL8,TYMP,NRXN3,CHL1,SMOC2,PLAUR,ROBO2,ROBO1,THBS4,CDH13,BIN2,CCL22,L1CAM,CSF1R,SEMA6A,ROBO4,BMP7,CCN1,EPHB6,CCL14,SEMA4G,S100A9,ELANE,CXCL12,FLT1,VASP,DEFA1
cell recognition	25	104	2.8	0.007	4.08663e-05	CRTAC1,CD226,ST6GALNAC6,EPHA4,FOLR2,EFNB3,CLEC7A,LBP,BSG,HAVCR2,COLEC12,NPTN,EPHB2,CNTN6,CNTN4,PCDH12,ROBO2,ROBO1,FCN1,NTM,FCN3,MFGE8,ROBO4,CRP,FETUB
regulation of immune response	76	473	1.7	0.007	4.26374e-05	ISG15,ZBP1,C1QC,GBP1,MAP2K4,LAG3,LGALS9,B2M,IFNL1,HSPA1A,C9,AZGP1,IFI16,DDX58,CD14,TLR5,TNFRSF1B,DHX58,PGLYRP2,PSMB4,CD226,IL18R1,SERPING1,HRG,CTSG,HMOX1,VSIG4,CD48,NPPA,NMI,CR1,CLEC7A,SIRT2,LBP,STAT1,HAVCR2,COLEC12,PRKCZ,C4A,CFP,CD74,CR2,IL12RB1,FCGR1A,IFNL3,PIGR,LILRB2,TNFSF13B,CD300A,FCGR3B,XRCC6,MICB,A2M,IL1R1,PSPC1,KIT,PTPRD,IL2,FURIN,FGL1,CTSH,FCN1,VSIR,FCN3,CFHR1,IL1RL1,KLK7,CRP,HSPA1B,MMP…
cell morphogenesis involved in differentiation	59	345	1.9	0.008	5.50593e-05	GBP1,LRRC4C,RELN,FLRT2,ANTXR1,MDK,CRABP2,EPHA4,SEMA4A,GFRA3,EPHA10,UNC5D,EFNB3,MERTK,B4GALT6,BSG,EPHA6,NTRK2,APOA1,NPTN,DCLK1,ITGB7,UNC5B,EPHB2,CNTN6,EFNB2,CNTN4,ISLR2,SLITRK1,ITGAV,BOC,SLITRK5,NOG,STC1,NTN1,PTPRD,DCC,NRXN3,CHL1,LRP4,ROBO2,ROBO1,COL15A1,HPRT1,L1CAM,SEMA6A,ROBO4,BMP7,OLFM4,POSTN,EPHB6,SEMA4G,SOD1,CXCL12,MYOC,VASP,ILK,SLITRK3,ARPC2
axon development	47	256	2	0.008	5.52557e-05	LRRC4C,RELN,FLRT2,CRTAC1,CRABP2,EPHA4,SEMA4A,GFRA3,EPHA10,KLK8,UNC5D,EFNB3,B4GALT6,BSG,EPHA6,NTRK2,DDR1,APOA1,NPTN,DCLK1,UNC5B,EPHB2,CNTN6,EFNB2,CNTN4,ISLR2,SLITRK1,BOC,SLITRK5,NOG,NTN1,DCC,NRXN3,CHL1,LRP4,ROBO2,ROBO1,L1CAM,SEMA6A,ROBO4,BMP7,EPHB6,SEMA4G,CXCL12,VASP,ILK,SLITRK3
axonogenesis	43	228	2.1	0.008	6.01137e-05	LRRC4C,RELN,FLRT2,CRABP2,EPHA4,SEMA4A,GFRA3,EPHA10,UNC5D,EFNB3,B4GALT6,BSG,EPHA6,NTRK2,NPTN,DCLK1,UNC5B,EPHB2,CNTN6,EFNB2,CNTN4,ISLR2,SLITRK1,BOC,SLITRK5,NOG,NTN1,DCC,NRXN3,CHL1,LRP4,ROBO2,ROBO1,L1CAM,SEMA6A,ROBO4,BMP7,EPHB6,SEMA4G,CXCL12,VASP,ILK,SLITRK3
response to virus	36	179	2.2	0.008	6.09685e-05	ISG15,MX1,ZBP1,IFIT3,GBP1,LGALS9,IFNL1,CXCL10,IFI16,DDX58,DHX58,PSMA2,RTP4,NMI,STAT1,AIMP1,IL12RB1,IFNA4,IFNL3,DCLK1,ILF3,MICB,IFNA7,CCL8,IFNA1,HYAL1,DEFA3,FCN3,CCL22,ATG7,MMP12,DTX3L,CXCL12,PENK,NPLOC4,DEFA1
negative regulation of multicellular organismal process	86	558	1.7	0.008	6.26297e-05	C1QC,GBP1,LAG3,LGALS9,B2M,IFNL1,CXCL10,CPB2,TNFRSF1B,RBP4,INHA,DHX58,PRTG,KLKB1,PGLYRP2,MDK,BMP10,IL18R1,SERPING1,HRG,SEMA4A,HMOX1,VSIG4,NPPA,NMI,KLK8,CR1,EFNB3,MERTK,SIRT2,LBP,TNFRSF11B,STAT1,KHSRP,HAVCR2,KNG1,APOA4,CD74,APOA1,NPTN,EPHB2,APOH,PLAT,NOG,CDH3,LDLRAD4,STC1,FAP,NTN1,DCC,IL2,IGFBP5,DCN,LRP4,FURIN,F2,SRSF6,ROBO2,ROBO1,ANXA5,VSIR,THBS4,IGF1,POMC,ACP5,DLL4,IAPP,PROC,SEMA6A,BMP7,IL1RL1,HA…
response to vitamin A	5	6	43.6	0.008	6.47848e-05	CAT,ALDH1A2,HAMP,ARG1,EPO
negative regulation of defense response	30	140	2.4	0.008	7.47212e-05	ISG15,LGALS9,SAA1,IFI16,TNFRSF1B,DHX58,MDK,PSMB4,SERPING1,VSIG4,NMI,CR1,SIRT2,HAVCR2,APOA1,IL22RA2,MICB,A2M,IL2,FURIN,WFDC1,IGF1,ACP5,PROC,HAMP,MMP12,SOD1,ELANE,ARG1,NPLOC4
killing by host of symbiont cells	9	20	7.2	0.008	7.66509e-05	HRG,CTSG,TREM1,F2,CFHR1,CAMP,ELANE,ARG1,DEFA1
killing of cells in other organism involved in symbiotic interaction	9	20	7.2	0.008	7.66509e-05	HRG,CTSG,TREM1,F2,CFHR1,CAMP,ELANE,ARG1,DEFA1
multicellular organismal process	348	2927	1.4	0.009	8.8572e-05	ISG15,C1QC,GBP1,MAP2K4,LAG3,LGALS9,B2M,CAT,IFNL1,CXCL10,CDON,WARS1,HSPA1A,SAA1,LCP1,AZGP1,IFI16,DDX58,CD14,TLR5,CPB2,TNFRSF1B,MPO,RBP4,COL11A2,HEXB,LRRC4C,TRA2B,INHA,CDH20,F9,CLEC11A,RELN,FLRT2,DHX58,TLL1,ANTXR1,PRTG,KLKB1,SNCG,SERPINA3,CDNF,GHR,PGLYRP2,NPS,UGP2,MDK,CRTAC1,CSF1,CD226,VIM,BMP10,IL18R1,MRC2,CRABP2,RTP4,CLSTN3,HGFAC,SERPING1,AGRN,HRG,EPHA4,SEMA4A,PLA2G2A,ROR1,CLPSL1,RACGAP1,GFRA3,PR…
positive regulation of response to stimulus	146	1068	1.5	0.009	9.19471e-05	ZBP1,C1QC,GBP1,LAG3,LGALS9,B2M,CAT,IFNL1,CXCL10,HSPA1A,C9,AZGP1,IFI16,DDX58,CD14,TLR5,CPB2,INHA,RELN,DHX58,MAP3K11,GHR,MDK,CSF1,CD226,BMP10,IL18R1,SERPING1,HRG,EPHA4,PLA2G2A,ROR1,CTSG,HMOX1,MGAT5,VSIG4,PLA2G7,NPPA,NMI,CR1,CLEC7A,IGF1R,LBP,TNFRSF10B,RNF146,HAVCR2,CCL17,INSR,RUVBL1,PRKCZ,C4A,NTRK2,CFP,CD74,CR2,IL12RB1,APOA1,NPTN,KITLG,IFNL3,PCNA,UNC5B,CNTN6,APOH,TNFSF13B,CD300A,GDF9,ITGAV,CCL7,CDH3…
regulation of multicellular organismal process	173	1305	1.4	0.009	9.49288e-05	ISG15,C1QC,GBP1,LAG3,LGALS9,B2M,IFNL1,CXCL10,WARS1,HSPA1A,SAA1,IFI16,DDX58,CD14,TLR5,CPB2,TNFRSF1B,RBP4,INHA,RELN,FLRT2,DHX58,PRTG,KLKB1,GHR,PGLYRP2,NPS,MDK,CSF1,CD226,BMP10,IL18R1,CRABP2,CLSTN3,SERPING1,AGRN,HRG,EPHA4,SEMA4A,RACGAP1,HMOX1,VSIG4,CELF2,NPPA,NMI,KLK8,CR1,EFNB3,CLEC7A,MERTK,SIRT2,IGF1R,LBP,TNFRSF11B,STAT1,IL15RA,KHSRP,HAVCR2,INSR,KNG1,APOA4,DSC2,PRKCZ,DDR2,NTRK2,FTO,CD74,MFAP2,GLUL,…
regulation of multicellular organismal development	103	705	1.6	0.01	0.000102608	ISG15,C1QC,LAG3,LGALS9,B2M,IFNL1,CXCL10,WARS1,HSPA1A,TNFRSF1B,RBP4,INHA,RELN,FLRT2,PRTG,PGLYRP2,MDK,CSF1,BMP10,CRABP2,CLSTN3,AGRN,HRG,EPHA4,SEMA4A,RACGAP1,HMOX1,KLK8,CR1,EFNB3,SIRT2,STAT1,IL15RA,INSR,PRKCZ,DDR2,NTRK2,CD74,GLUL,IL12RB1,NPTN,KITLG,EPHB2,APOH,LILRB2,ISLR2,SLITRK1,GDF9,SULT2B1,NOG,MAFG,CDH3,XRCC6,KIT,COMP,NTN1,PTPRD,DCC,TYMP,IL2,SMOC2,DCN,LRP4,SFRP4,F2,SRSF6,ANGPTL3,ROBO2,ROBO1,CTSH,…
immune effector process	60	362	1.8	0.011	0.000119804	C1QC,LAG3,LGALS9,B2M,IFNL1,C9,LCP1,AZGP1,DDX58,TNFRSF1B,MPO,RBP4,DHX58,PGLYRP2,MDK,CD226,IL18R1,SERPING1,SEMA4A,CTSG,HMOX1,VSIG4,NPPA,NMI,CR1,CLEC7A,LBP,TREM1,HAVCR2,PRKCZ,C4A,CFP,CD74,CR2,IL12RB1,IFNA4,APOA1,CDH17,EPHB2,CD300A,A2M,IL1R1,KIT,IFNA7,IL2,IFNA1,F2,CTSH,FCN1,HPRT1,FCN3,CFHR1,RORC,UNG,KLK7,CRP,ELANE,ARG1,C1R,S100A13
cell surface receptor signaling pathway	179	1370	1.4	0.014	0.000157116	ISG15,MX1,ZBP1,GBP1,MAP2K4,LAG3,IFNL1,CXCL10,CDON,HSPA1A,CD14,TNFRSF1B,LILRA1,INHA,RELN,FLRT2,GHR,MDK,CSF1,CD226,VIM,BMP10,IL18R1,HRG,EPHA4,SEMA4A,CXCL11,ROR1,GFRA3,EPHA10,FCRL4,CTSG,HMOX1,MGAT5,NPPA,NMI,UNC5D,LILRA3,CR1,EFNB3,CLEC7A,MERTK,SIRT2,IGF1R,LBP,TNFRSF10B,CTHRC1,STAT1,IL15RA,BSG,RNF146,CCL17,CNTN1,EPHA6,INSR,IL22RA1,IGF2R,RUVBL1,VWC2,PRKCZ,DDR2,NTRK2,CD74,MMP2,CR2,DDR1,IL12RB1,FCGR1A,IF…
multicellular organism development	271	2215	1.4	0.016	0.000182558	ISG15,C1QC,MAP2K4,LAG3,LGALS9,B2M,CAT,IFNL1,CXCL10,CDON,WARS1,HSPA1A,LCP1,IFI16,CPB2,TNFRSF1B,RBP4,COL11A2,HEXB,LRRC4C,TRA2B,INHA,CDH20,RELN,FLRT2,TLL1,ANTXR1,PRTG,CDNF,GHR,PGLYRP2,UGP2,MDK,CRTAC1,CSF1,VIM,BMP10,IL18R1,CRABP2,CLSTN3,AGRN,HRG,EPHA4,SEMA4A,ROR1,RACGAP1,GFRA3,PRTN3,EPHA10,LRIG3,HMOX1,NPPA,CHAD,KLK8,UNC5D,CR1,EFNB3,TRAPPC6B,MERTK,SIRT2,IGF1R,NELFA,TNFRSF11B,CTHRC1,B4GALT6,STAT1,IL15R…
defense response to virus	27	127	2.4	0.016	0.000194953	ISG15,MX1,ZBP1,IFIT3,GBP1,IFNL1,CXCL10,IFI16,DDX58,DHX58,RTP4,STAT1,AIMP1,IL12RB1,IFNA4,IFNL3,ILF3,MICB,IFNA7,IFNA1,DEFA3,FCN3,ATG7,MMP12,DTX3L,NPLOC4,DEFA1
defense response to symbiont	27	127	2.4	0.016	0.000194953	ISG15,MX1,ZBP1,IFIT3,GBP1,IFNL1,CXCL10,IFI16,DDX58,DHX58,RTP4,STAT1,AIMP1,IL12RB1,IFNA4,IFNL3,ILF3,MICB,IFNA7,IFNA1,DEFA3,FCN3,ATG7,MMP12,DTX3L,NPLOC4,DEFA1
neutrophil mediated cytotoxicity	5	7	21.8	0.016	0.000207347	CTSG,TREM1,F2,ELANE,ARG1
neutrophil-mediated killing of symbiont cell	5	7	21.8	0.016	0.000207347	CTSG,TREM1,F2,ELANE,ARG1
biological process involved in interspecies interaction between organisms	119	857	1.5	0.019	0.000257056	ISG15,MX1,ZBP1,IFIT3,C1QC,GBP1,LAG3,LGALS9,B2M,IFNL1,CXCL10,HSPA1A,C9,IFI16,DDX58,CD14,TLR5,TNFRSF1B,MPO,H2BC21,H2BC12,DHX58,PSMA2,PGLYRP2,CSF1,HP,CD226,VIM,LRRC15,RTP4,SERPING1,HRG,PLA2G2A,CXCL11,PRTN3,CTSG,VSIG4,NMI,CR1,EFNB3,CLEC7A,SIRT2,LBP,STAT1,TREM1,BSG,HAVCR2,CCL17,AIMP1,INSR,COLEC12,IL22RA1,IGF2R,APOA4,C4A,CFP,CD74,CR2,IL12RB1,FCGR1A,IFNA4,IFNL3,DCLK1,ITGB7,LEAP2,EFNB2,ILF3,LILRB2,ITGAV,…
biological process involved in symbiotic interaction	33	171	2.1	0.02	0.000278087	LGALS9,HSPA1A,PGLYRP2,LRRC15,HRG,CTSG,CR1,EFNB3,TREM1,BSG,INSR,IGF2R,CD74,CR2,ITGB7,EFNB2,ITGAV,CCL8,F2,FCN1,HSPA8,FCN3,CFHR1,CAMP,SIGLEC1,CRP,ATG7,HSPA1B,ELANE,CTSB,ARG1,CHMP2B,DEFA1,INHBB
regulation of cell population proliferation	121	877	1.5	0.021	0.000296126	IFIT3,LGALS9,B2M,IFNL1,CXCL10,WARS1,RBBP4,HSPA1A,AZGP1,CPB2,TNFRSF1B,RBP4,INHA,CLEC11A,MDK,CSF1,BMP10,HRG,CXCL11,PRTN3,HMOX1,FOLR2,CDK2,VSIG4,NMI,FTH1,CR1,CLEC7A,SIRT2,IGF1R,CTHRC1,STAT1,HAVCR2,AIMP1,INSR,PRKCZ,DDR2,NTRK2,FTO,CD74,MMP2,DDR1,GLUL,IL12RB1,MATK,KITLG,TNFRSF8,EPHB2,APOH,EFNB2,SCGB3A1,LILRB2,TNFSF13B,CD300A,GDF9,SULT2B1,ITGAV,LST1,NOG,MAFG,CDH3,FGF19,XRCC6,SFRP5,FAP,KIT,COMP,NTN1,KLB,…
system development	255	2080	1.4	0.021	0.000300728	ISG15,C1QC,MAP2K4,LAG3,LGALS9,B2M,CAT,IFNL1,CXCL10,CDON,WARS1,HSPA1A,LCP1,IFI16,CPB2,TNFRSF1B,RBP4,COL11A2,HEXB,LRRC4C,TRA2B,INHA,RELN,FLRT2,TLL1,ANTXR1,PRTG,CDNF,GHR,PGLYRP2,UGP2,MDK,CRTAC1,CSF1,VIM,BMP10,IL18R1,CRABP2,CLSTN3,AGRN,HRG,EPHA4,SEMA4A,ROR1,RACGAP1,GFRA3,PRTN3,EPHA10,LRIG3,HMOX1,NPPA,CHAD,KLK8,UNC5D,CR1,EFNB3,TRAPPC6B,MERTK,SIRT2,TNFRSF11B,CTHRC1,B4GALT6,STAT1,IL15RA,BSG,HAVCR2,CBLN4…
complement activation	14	49	3.5	0.021	0.000307613	C1QC,C9,SERPING1,VSIG4,CR1,C4A,CFP,CR2,A2M,FCN1,FCN3,CFHR1,CRP,C1R
regulation of immune system process	107	761	1.5	0.023	0.000347132	ISG15,ZBP1,C1QC,GBP1,MAP2K4,LAG3,LGALS9,B2M,IFNL1,CXCL10,HSPA1A,C9,AZGP1,IFI16,DDX58,CD14,TLR5,TNFRSF1B,RBP4,INHA,DHX58,PGLYRP2,MDK,CSF1,PSMB4,CD226,IL18R1,SERPING1,HRG,PLA2G2A,CTSG,HMOX1,VSIG4,CD48,PLA2G7,NPPA,NMI,CR1,EFNB3,CLEC7A,MERTK,SIRT2,LBP,STAT1,IL15RA,HAVCR2,COLEC12,PRKCZ,C4A,CFP,CD74,CR2,IL12RB1,FCGR1A,APOA1,KITLG,IFNL3,PIGR,EPHB2,LILRB2,TNFSF13B,CD300A,LST1,FCGR3B,CCL7,XRCC6,MICB,A2M,I…
response to organic substance	192	1508	1.4	0.023	0.000368488	ISG15,MX1,ZBP1,IFIT3,GBP1,MAP2K4,LGALS9,B2M,CAT,NADK,CXCL10,HSPA1A,IFI16,DDX58,CD14,CPB2,TNFRSF1B,MPO,LILRA1,RBP4,TRA2B,FLRT2,UBE4A,GHR,SRSF7,MDK,CSF1,VIM,BMP10,IL18R1,AGRN,HRG,EPHA4,CXCL11,CTSG,HMOX1,FOLR2,NPPA,NMI,H2AZ1,DCPS,LILRA3,CLEC7A,SIRT2,IGF1R,LBP,TNFRSF11B,STAT1,IL15RA,BSG,KHSRP,HAVCR2,CCL17,INSR,TDO2,COLEC12,IL22RA1,IGF2R,APOA4,VWC2,PRKCZ,NTRK2,CALB1,CD74,MMP2,GLUL,IL12RB1,IFNA4,APOA1,…
response to chemical	241	1956	1.4	0.023	0.00036897	ISG15,MX1,ZBP1,IFIT3,GBP1,MAP2K4,LGALS9,B2M,CAT,NADK,NUCB1,CXCL10,HSPA1A,SAA1,AZGP1,IFI16,DDX58,CD14,CPB2,TNFRSF1B,MPO,LILRA1,RBP4,TRA2B,RELN,FLRT2,UBE4A,GHR,SRSF7,MDK,CSF1,HP,VIM,BMP10,IL18R1,RTP4,AGRN,HRG,EPHA4,SEMA4A,CXCL11,CLPSL1,GFRA3,EPHA10,CTSG,HMOX1,FOLR2,CDK2,PLA2G7,NPPA,NMI,H2AZ1,DCPS,UNC5D,LILRA3,EFNB3,CLEC7A,SIRT2,IGF1R,LBP,TNFRSF11B,STAT1,IL15RA,TREM1,BSG,KHSRP,HAVCR2,CCL17,EPHA6,INS…
zymogen activation	12	39	3.9	0.024	0.000388546	IFI16,CPB2,F9,KLKB1,HP,HGFAC,APOH,PLAT,FURIN,CTSH,VSIR,C1R
extracellular matrix disassembly	13	45	3.6	0.027	0.000446095	LCP1,CTSG,DDR2,MMP2,DDR1,CTSV,FAP,TPSAB1,FURIN,KLK7,FGFR4,MMP12,ELANE
negative regulation of innate immune response	12	40	3.8	0.03	0.000503696	ISG15,LGALS9,IFI16,DHX58,SERPING1,VSIG4,NMI,CR1,HAVCR2,A2M,MMP12,ARG1
cell morphogenesis involved in neuron differentiation	46	273	1.8	0.03	0.000521655	LRRC4C,RELN,FLRT2,CRABP2,EPHA4,SEMA4A,GFRA3,EPHA10,UNC5D,EFNB3,B4GALT6,BSG,EPHA6,NTRK2,NPTN,DCLK1,UNC5B,EPHB2,CNTN6,EFNB2,CNTN4,ISLR2,SLITRK1,BOC,SLITRK5,NOG,NTN1,PTPRD,DCC,NRXN3,CHL1,LRP4,ROBO2,ROBO1,HPRT1,L1CAM,SEMA6A,ROBO4,BMP7,EPHB6,SEMA4G,SOD1,CXCL12,VASP,ILK,SLITRK3
humoral immune response	33	177	2	0.031	0.000534406	C1QC,CXCL10,C9,H2BC21,H2BC12,SERPING1,HRG,CXCL11,PRTN3,CTSG,VSIG4,CR1,TREM1,C4A,CFP,CR2,IFNA4,LEAP2,A2M,IFNA7,IFNA1,F2,FCN1,DEFA3,FCN3,CFHR1,KLK7,CAMP,CRP,S100A9,ELANE,C1R,DEFA1
positive regulation of cell communication	117	859	1.4	0.035	0.000640124	ZBP1,LGALS9,CAT,NADK,IFNL1,HSPA1A,CD14,TLR5,RBP4,INHA,RELN,DHX58,MAP3K11,GHR,NPS,CSF1,CD226,BMP10,IL18R1,CLSTN3,EPHA4,PLA2G2A,ROR1,HMOX1,MGAT5,NPPA,NMI,CLEC7A,IGF1R,LBP,TNFRSF10B,RNF146,HAVCR2,CCL17,AIMP1,INSR,RUVBL1,PRKCZ,NTRK2,CALB1,CD74,GLUL,APOA1,NPTN,KITLG,UNC5B,EPHB2,CNTN6,LILRB2,CD300A,GDF9,SCGN,ITGAV,PCK2,CCL7,CDH3,FGF19,IL1R1,KIT,STAU1,VWF,KLB,CCL8,TIMP2,IGFBP5,IGF2,SMOC2,DCN,SFRP4,F2,PL…
regulation of fibrinolysis	6	12	8.7	0.035	0.000647718	CPB2,KLKB1,HRG,APOH,FAP,F2
cytokine production	66	433	1.6	0.035	0.000654288	ISG15,GBP1,LAG3,LGALS9,B2M,IFNL1,HSPA1A,SAA1,IFI16,DDX58,CD14,TLR5,TNFRSF1B,INHA,DHX58,PGLYRP2,MDK,CD226,IL18R1,HMOX1,VSIG4,NMI,CR1,CLEC7A,MERTK,LBP,STAT1,TREM1,HAVCR2,PRKCZ,CD74,IL12RB1,APOA1,NPTN,TNFRSF8,EPHB2,LILRB2,ITGAV,CDH3,LUM,IL1R1,KIT,IL2,FURIN,F2,FCN1,VSIR,IGF1,POMC,ACP5,C1QTNF4,PLA2R1,CSF1R,IL1RL1,POSTN,CRP,HSPA1B,MMP12,SOD1,ELANE,ARG1,FLT4,NPLOC4,INHBA,S100A13,INHBB,HOMER2
positive regulation of immune system process	75	507	1.6	0.037	0.000692016	ZBP1,C1QC,GBP1,LAG3,LGALS9,B2M,IFNL1,CXCL10,C9,AZGP1,IFI16,DDX58,RBP4,DHX58,MDK,CSF1,CD226,IL18R1,SERPING1,HRG,CTSG,HMOX1,VSIG4,PLA2G7,NPPA,NMI,CR1,EFNB3,CLEC7A,LBP,IL15RA,HAVCR2,PRKCZ,C4A,CFP,CD74,CR2,IL12RB1,KITLG,IFNL3,EPHB2,LILRB2,TNFSF13B,CD300A,CCL7,XRCC6,MICB,A2M,IL1R1,PSPC1,KIT,HSPH1,CCL8,IL2,IGF2,FCN1,VSIR,THBS4,IGF1,FCN3,CFHR1,ROR2,CSF1R,IL1RL1,KLK7,HAMP,CRP,MMP12,PRKCA,ELANE,ARG1,CXCL1…
positive regulation of multicellular organismal process	105	759	1.5	0.037	0.000729658	ISG15,LGALS9,B2M,IFNL1,HSPA1A,SAA1,IFI16,DDX58,CD14,TLR5,CPB2,TNFRSF1B,INHA,RELN,FLRT2,DHX58,GHR,NPS,MDK,CSF1,CD226,BMP10,IL18R1,CRABP2,CLSTN3,AGRN,HRG,EPHA4,SEMA4A,HMOX1,NPPA,CR1,CLEC7A,IGF1R,LBP,STAT1,IL15RA,HAVCR2,PRKCZ,NTRK2,CD74,MFAP2,IL12RB1,NPTN,KITLG,TNFRSF8,EPHB2,APOH,EFNB2,LILRB2,ISLR2,SLITRK1,NOG,LUM,XRCC6,IL1R1,KIT,NTN1,PTPRD,IL2,IGF2,SMOC2,FURIN,F2,ANGPTL3,ROBO2,ROBO1,CTSH,HYAL1,FCN1…
regulation of cytokine production	65	427	1.6	0.037	0.00074584	ISG15,GBP1,LAG3,LGALS9,B2M,IFNL1,HSPA1A,SAA1,IFI16,DDX58,CD14,TLR5,TNFRSF1B,INHA,DHX58,PGLYRP2,MDK,CD226,IL18R1,HMOX1,VSIG4,NMI,CR1,CLEC7A,MERTK,LBP,STAT1,HAVCR2,PRKCZ,CD74,IL12RB1,APOA1,NPTN,TNFRSF8,EPHB2,LILRB2,ITGAV,CDH3,LUM,IL1R1,KIT,IL2,FURIN,F2,FCN1,VSIR,IGF1,POMC,ACP5,C1QTNF4,PLA2R1,CSF1R,IL1RL1,POSTN,CRP,HSPA1B,MMP12,SOD1,ELANE,ARG1,FLT4,NPLOC4,INHBA,S100A13,INHBB,HOMER2
negative regulation of response to biotic stimulus	15	59	3	0.037	0.00074998	ISG15,LGALS9,IFI16,DHX58,SERPING1,VSIG4,NMI,CR1,SIRT2,HAVCR2,MICB,A2M,MMP12,ARG1,NPLOC4
negative regulation of cytokine production	30	159	2.1	0.037	0.00077142	GBP1,LAG3,LGALS9,IFNL1,INHA,DHX58,PGLYRP2,HMOX1,VSIG4,NMI,CR1,MERTK,LBP,HAVCR2,APOA1,NPTN,CDH3,FURIN,F2,VSIR,IGF1,POMC,ACP5,IL1RL1,ELANE,ARG1,NPLOC4,INHBA,INHBB,HOMER2
cytokine-mediated signaling pathway	49	301	1.7	0.037	0.00077469	ISG15,MX1,ZBP1,CXCL10,HSPA1A,TNFRSF1B,LILRA1,GHR,CSF1,IL18R1,CXCL11,CTSG,NMI,LILRA3,STAT1,IL15RA,CCL17,IL22RA1,CD74,IL12RB1,IFNA4,APOA1,IL1RN,IL22RA2,LILRB2,TNFSF13B,CCL7,IL1R1,KIT,IFNA7,CCL8,IFNA1,ROBO1,LIFR,TRADD,CNTFR,CCL22,C1QTNF4,CSF1R,IL1RL1,CPNE1,CCL14,HSPA1B,LILRA6,MMP12,THPO,ARG1,CXCL12,ILK,EPO
response to stress	223	1812	1.3	0.037	0.000786085	ISG15,MX1,ZBP1,IFIT3,C1QC,GBP1,MAP2K4,LAG3,LGALS9,B2M,CAT,IFNL1,CXCL10,CD300C,HSPA1A,SAA1,C9,IFI16,DDX58,CD14,TLR5,CPB2,TNFRSF1B,MPO,LILRA1,H2BC21,H2BC12,SAA2,TRA2B,F9,RELN,DHX58,UBE4A,MAP3K11,KLKB1,H2AW,SERPINA3,PGLYRP2,MDK,CSF1,HP,PSMB4,CD226,VIM,BMP10,IL18R1,RTP4,HGFAC,SERPING1,HRG,EPHA4,PLA2G2A,CXCL11,CTSG,HMOX1,FOLR2,CDK2,VSIG4,CD48,PLA2G7,NPPA,NMI,KLK8,CR1,CLEC7A,MERTK,SIRT2,IGF1R,LBP,TNFRS…
cell population proliferation	133	1003	1.4	0.037	0.000802554	IFIT3,LGALS9,B2M,IFNL1,CXCL10,WARS1,RBBP4,HSPA1A,AZGP1,CPB2,TNFRSF1B,RBP4,INHA,CLEC11A,MDK,CSF1,BMP10,HRG,CXCL11,RACGAP1,PRTN3,HMOX1,FOLR2,CDK2,VSIG4,NMI,FTH1,KLK8,CR1,CLEC7A,SIRT2,IGF1R,CTHRC1,STAT1,HAVCR2,AIMP1,INSR,PRKCZ,DDR2,NTRK2,FTO,CD74,MMP2,CR2,DDR1,GLUL,IL12RB1,MATK,IFNA4,APOA1,KITLG,TNFRSF8,EPHB2,APOH,EFNB2,SCGB3A1,LILRB2,TNFSF13B,CD300A,TEAD3,GDF9,SULT2B1,ITGAV,LST1,NOG,MAFG,CDH3,FGF19…
positive regulation of signaling	117	864	1.4	0.037	0.000803623	ZBP1,LGALS9,CAT,NADK,IFNL1,HSPA1A,CD14,TLR5,RBP4,INHA,RELN,DHX58,MAP3K11,GHR,NPS,CSF1,CD226,BMP10,IL18R1,CLSTN3,EPHA4,PLA2G2A,ROR1,HMOX1,MGAT5,NPPA,NMI,CLEC7A,IGF1R,LBP,TNFRSF10B,RNF146,HAVCR2,CCL17,AIMP1,INSR,RUVBL1,PRKCZ,NTRK2,CALB1,CD74,GLUL,APOA1,NPTN,KITLG,UNC5B,EPHB2,CNTN6,LILRB2,CD300A,GDF9,SCGN,ITGAV,PCK2,CCL7,CDH3,FGF19,IL1R1,KIT,STAU1,VWF,KLB,CCL8,TIMP2,IGFBP5,IGF2,SMOC2,DCN,SFRP4,F2,PL…
regulation of long-term synaptic potentiation	9	26	4.6	0.037	0.000805098	RELN,EPHA4,CALB1,NPTN,EPHB2,LILRB2,SCGN,STAU1,NRGN
negative regulation of hemostasis	12	42	3.5	0.037	0.000821166	CPB2,KLKB1,SERPING1,HRG,KNG1,APOH,PLAT,FAP,COMP,F2,PROC,UBASH3B
neuron projection morphogenesis	50	310	1.7	0.037	0.000850048	LRRC4C,RELN,FLRT2,CRABP2,EPHA4,SEMA4A,GFRA3,EPHA10,KLK8,UNC5D,EFNB3,B4GALT6,BSG,EPHA6,PRKCZ,NTRK2,DDR1,NPTN,DCLK1,UNC5B,EPHB2,CNTN6,EFNB2,CNTN4,ISLR2,SLITRK1,BOC,SLITRK5,NOG,NTN1,PTPRD,DCC,NRXN3,CHL1,LRP4,ROBO2,ROBO1,HPRT1,L1CAM,SEMA6A,ROBO4,BMP7,POSTN,CPNE1,EPHB6,SEMA4G,CXCL12,VASP,ILK,SLITRK3
cell morphogenesis	71	478	1.6	0.037	0.000861617	GBP1,HEXB,LRRC4C,CDH20,RELN,FLRT2,ANTXR1,MDK,CRABP2,EPHA4,SEMA4A,GFRA3,EPHA10,KLK8,UNC5D,EFNB3,MERTK,B4GALT6,BSG,EPHA6,PRKCZ,NTRK2,DDR1,APOA1,NPTN,DCLK1,ITGB7,UNC5B,EPHB2,CNTN6,EFNB2,CNTN4,ISLR2,SLITRK1,ITGAV,BOC,LST1,SLITRK5,NOG,CCL7,RASA1,STC1,KIT,NTN1,PTPRD,DCC,NRXN3,CHL1,LRP4,F2,ROBO2,ROBO1,COL15A1,HPRT1,L1CAM,CSF1R,SEMA6A,ROBO4,BMP7,OLFM4,POSTN,CPNE1,EPHB6,SEMA4G,SOD1,CXCL12,MYOC,VASP,ILK,SL…
cell projection morphogenesis	51	318	1.7	0.037	0.000862728	LRRC4C,RELN,FLRT2,MDK,CRABP2,EPHA4,SEMA4A,GFRA3,EPHA10,KLK8,UNC5D,EFNB3,B4GALT6,BSG,EPHA6,PRKCZ,NTRK2,DDR1,NPTN,DCLK1,UNC5B,EPHB2,CNTN6,EFNB2,CNTN4,ISLR2,SLITRK1,BOC,SLITRK5,NOG,NTN1,PTPRD,DCC,NRXN3,CHL1,LRP4,ROBO2,ROBO1,HPRT1,L1CAM,SEMA6A,ROBO4,BMP7,POSTN,CPNE1,EPHB6,SEMA4G,CXCL12,VASP,ILK,SLITRK3
killing of cells of other organism	13	48	3.3	0.037	0.000879976	H2BC12,HRG,CTSG,CLEC7A,TREM1,F2,DEFA3,CFHR1,CAMP,HAMP,ELANE,ARG1,DEFA1
response to wounding	53	334	1.7	0.037	0.000883465	MAP2K4,SAA1,CPB2,F9,KLKB1,MDK,HGFAC,SERPING1,HRG,EPHA4,HMOX1,KLK8,CLEC7A,MERTK,KNG1,DDR1,APOA1,EPHB2,APOH,PLAT,ENTPD1,NOG,CDH3,FAP,COMP,LYVE1,VWF,TREML1,F13A1,CHL1,SMOC2,DCN,F2,SRSF6,PLAUR,F13B,ANXA5,WFDC1,IGF1,PROC,CCN1,POSTN,ANXA6,TIMP1,MMP12,GP5,SOD1,PRKCA,UBASH3B,ARG1,ILK,EPO,INHBB
defense response to other organism	85	595	1.5	0.038	0.000928927	ISG15,MX1,ZBP1,IFIT3,C1QC,GBP1,LAG3,LGALS9,IFNL1,CXCL10,C9,IFI16,DDX58,CD14,TLR5,MPO,H2BC21,H2BC12,DHX58,PGLYRP2,CSF1,HP,CD226,VIM,RTP4,SERPING1,HRG,PLA2G2A,CTSG,VSIG4,NMI,CR1,CLEC7A,SIRT2,LBP,STAT1,TREM1,HAVCR2,CCL17,AIMP1,COLEC12,IL22RA1,APOA4,C4A,CFP,CD74,CR2,IL12RB1,FCGR1A,IFNA4,IFNL3,LEAP2,ILF3,CCL7,XRCC6,MICB,A2M,PSPC1,IFNA7,TREML1,CCL8,IFNA1,F2,FCN1,DEFA3,FCN3,CCL22,CFHR1,ACP5,CSF1R,KLK7,C…
regulation of nervous system development	40	236	1.8	0.043	0.00106308	B2M,TNFRSF1B,RELN,FLRT2,PRTG,MDK,CRABP2,CLSTN3,AGRN,EPHA4,SEMA4A,KLK8,EFNB3,SIRT2,NTRK2,NPTN,EPHB2,ISLR2,SLITRK1,NOG,KIT,NTN1,PTPRD,DCC,TYMP,LRP4,F2,ROBO2,ROBO1,L1CAM,DLL4,SEMA6A,BMP7,CBLN2,SEMA4G,CXCL12,THBS2,SPINT1,ILK,SLITRK3
response to stimulus	401	3523	1.3	0.043	0.00106532	ISG15,MX1,ZBP1,IFIT3,C1QC,GBP1,MAP2K4,LAG3,LGALS9,B2M,CAT,NADK,IFNL1,NUCB1,CXCL10,CD300C,CDON,HSPA1A,SAA1,C9,LCP1,AZGP1,IFI16,DDX58,CD14,TLR5,CPB2,TNFRSF1B,MPO,LILRA1,RBP4,H2BC21,H2BC12,SAA2,TRA2B,INHA,F9,CLEC11A,RELN,FLRT2,DHX58,UBE4A,MAP3K11,PSMA2,KLKB1,HSH2D,H2AW,SERPINA3,CDNF,GHR,PGLYRP2,NPS,SRSF7,MDK,CSF1,HP,PSMB4,CD226,VIM,BMP10,IL18R1,CRABP2,RTP4,HGFAC,SERPING1,AGRN,HRG,EPHA4,SEMA4A,PLA2G2…
negative regulation of follicle-stimulating hormone secretion	3	3	Inf	0.043	0.00110985	INHA,INHBA,INHBB
trans-synaptic signaling by trans-synaptic complex, modulating synaptic transmission	3	3	Inf	0.043	0.00110985	EFNB3,NPTN,EPHB2
locomotion	121	906	1.4	0.043	0.00110987	LGALS9,CXCL10,SAA1,LCP1,DDX58,HEXB,RELN,FLRT2,MDK,CSF1,BMP10,LRRC15,HRG,EPHA4,SEMA4A,CXCL11,GFRA3,PRTN3,EPHA10,HMOX1,MGAT5,PLA2G7,UNC5D,EFNB3,CLEC7A,MERTK,IGF1R,LBP,CTHRC1,TREM1,BSG,CCL17,EPHA6,AIMP1,INSR,PRKCZ,DDR2,NTRK2,CD74,DDR1,GLUL,APOA1,NPTN,KITLG,DCLK1,ITGB7,UNC5B,EPHB2,CNTN6,APOH,EFNB2,CNTN4,CD300A,PLAT,MSMP,DSTN,ITGAV,BOC,NOG,CCL7,LDLRAD4,FGF19,STC1,FAP,IL1R1,KIT,NTN1,DCC,CCL8,TYMP,NRXN3…
regulation of response to external stimulus	79	549	1.5	0.044	0.00114979	ISG15,ZBP1,LAG3,LGALS9,CXCL10,SAA1,IFI16,DDX58,CPB2,TNFRSF1B,DHX58,KLKB1,PGLYRP2,MDK,CSF1,PSMB4,CD226,SERPING1,HRG,EPHA4,SEMA4A,PLA2G2A,VSIG4,PLA2G7,NPPA,NMI,KLK8,CR1,CLEC7A,SIRT2,LBP,STAT1,HAVCR2,KNG1,CD74,IL12RB1,APOA1,EPHB2,APOH,EFNB2,IL22RA2,PLAT,CCL7,XRCC6,MICB,A2M,FAP,IL1R1,PSPC1,IL2,SMOC2,FURIN,F2,ROBO2,ROBO1,FCN1,WFDC1,THBS4,CDH13,IGF1,TRADD,ACP5,PROC,CSF1R,SEMA6A,IL1RL1,KLK7,HAMP,MMP12,D…
anatomical structure morphogenesis	157	1225	1.4	0.044	0.00118811	GBP1,CXCL10,CDON,WARS1,CPB2,TNFRSF1B,RBP4,HEXB,LRRC4C,CDH20,RELN,FLRT2,ANTXR1,GHR,MDK,CSF1,BMP10,CRABP2,AGRN,HRG,EPHA4,SEMA4A,ROR1,GFRA3,EPHA10,LRIG3,HMOX1,NPPA,CHAD,KLK8,UNC5D,EFNB3,MERTK,TNFRSF11B,CTHRC1,B4GALT6,STAT1,BSG,EPHA6,AIMP1,INSR,PRKCZ,NTRK2,CALB1,MMP2,DDR1,MFAP2,GLUL,APOA1,NPTN,DCLK1,IL1RN,ITGB7,UNC5B,EPHB2,CNTN6,APOH,EFNB2,SCGB3A1,CDSN,TNFSF13B,CNTN4,ISLR2,SLITRK1,ITGAV,BOC,LST1,SLIT…
acute-phase response	11	38	3.6	0.044	0.00119504	SAA1,SAA2,SERPINA3,HP,LBP,SAA4,F2,APOL2,HAMP,CRP,EPO
negative regulation of immune response	24	121	2.2	0.045	0.00124001	ISG15,LGALS9,IFNL1,IFI16,DHX58,PGLYRP2,PSMB4,SERPING1,HMOX1,VSIG4,NMI,CR1,SIRT2,HAVCR2,CR2,CD300A,MICB,A2M,IL2,FURIN,IL1RL1,MMP12,ARG1,NPLOC4
negative regulation of coagulation	12	44	3.3	0.046	0.00129041	CPB2,KLKB1,SERPING1,HRG,KNG1,APOH,PLAT,FAP,F2,ANXA5,PROC,UBASH3B
plasma membrane bounded cell projection morphogenesis	50	316	1.7	0.046	0.00131401	LRRC4C,RELN,FLRT2,CRABP2,EPHA4,SEMA4A,GFRA3,EPHA10,KLK8,UNC5D,EFNB3,B4GALT6,BSG,EPHA6,PRKCZ,NTRK2,DDR1,NPTN,DCLK1,UNC5B,EPHB2,CNTN6,EFNB2,CNTN4,ISLR2,SLITRK1,BOC,SLITRK5,NOG,NTN1,PTPRD,DCC,NRXN3,CHL1,LRP4,ROBO2,ROBO1,HPRT1,L1CAM,SEMA6A,ROBO4,BMP7,POSTN,CPNE1,EPHB6,SEMA4G,CXCL12,VASP,ILK,SLITRK3
positive regulation of signal transduction	104	763	1.4	0.046	0.00131453	ZBP1,LGALS9,CAT,IFNL1,HSPA1A,CD14,TLR5,INHA,RELN,DHX58,MAP3K11,GHR,CSF1,CD226,BMP10,IL18R1,EPHA4,PLA2G2A,ROR1,HMOX1,MGAT5,NPPA,NMI,CLEC7A,IGF1R,LBP,TNFRSF10B,RNF146,HAVCR2,CCL17,INSR,RUVBL1,PRKCZ,NTRK2,CD74,APOA1,NPTN,KITLG,UNC5B,CNTN6,CD300A,GDF9,ITGAV,CCL7,CDH3,FGF19,IL1R1,KIT,VWF,KLB,CCL8,TIMP2,IGFBP5,IGF2,SMOC2,DCN,SFRP4,F2,PLAUR,ROBO2,ROBO1,CTSH,CDH13,IGF1,PDGFC,POMC,TRADD,CCL22,C1QTNF4,ROR2…
interferon-gamma production	17	75	2.6	0.047	0.00139122	ISG15,LGALS9,IFNL1,CD14,INHA,PGLYRP2,CD226,IL18R1,CR1,CLEC7A,HAVCR2,IL12RB1,IL1R1,IL2,VSIR,IL1RL1,INHBA
regulation of interferon-gamma production	17	75	2.6	0.047	0.00139122	ISG15,LGALS9,IFNL1,CD14,INHA,PGLYRP2,CD226,IL18R1,CR1,CLEC7A,HAVCR2,IL12RB1,IL1R1,IL2,VSIR,IL1RL1,INHBA
cell part morphogenesis	51	325	1.7	0.047	0.00142082	LRRC4C,RELN,FLRT2,MDK,CRABP2,EPHA4,SEMA4A,GFRA3,EPHA10,KLK8,UNC5D,EFNB3,B4GALT6,BSG,EPHA6,PRKCZ,NTRK2,DDR1,NPTN,DCLK1,UNC5B,EPHB2,CNTN6,EFNB2,CNTN4,ISLR2,SLITRK1,BOC,SLITRK5,NOG,NTN1,PTPRD,DCC,NRXN3,CHL1,LRP4,ROBO2,ROBO1,HPRT1,L1CAM,SEMA6A,ROBO4,BMP7,POSTN,CPNE1,EPHB6,SEMA4G,CXCL12,VASP,ILK,SLITRK3
response to cytokine	76	528	1.5	0.047	0.00142131	ISG15,MX1,ZBP1,IFIT3,GBP1,LGALS9,CXCL10,HSPA1A,IFI16,DDX58,CD14,TNFRSF1B,LILRA1,GHR,SRSF7,CSF1,VIM,IL18R1,CXCL11,CTSG,NMI,LILRA3,STAT1,IL15RA,KHSRP,CCL17,IL22RA1,CD74,IL12RB1,IFNA4,APOA1,IL1RN,IL22RA2,LILRB2,TNFSF13B,ADAM23,PCK2,CCL7,NCL,IL1R1,KIT,IL18BP,IFNA7,CCL8,TIMP2,IFNA1,ROBO1,LIFR,HYAL1,ASAH2,TRADD,CNTFR,CCL22,ACP5,C1QTNF4,ALAD,ALDH1A2,CSF1R,IL1RL1,POSTN,CAMP,CPNE1,CCL14,HAMP,HSPA1B,TIMP1,…
collagen-activated tyrosine kinase receptor signaling pathway	4	6	17.4	0.047	0.00144731	DDR2,DDR1,MUSK,UBASH3B
neutrophil-mediated killing of bacterium	4	6	17.4	0.047	0.00144731	CTSG,TREM1,F2,ELANE
response to other organism	105	774	1.4	0.047	0.00146617	ISG15,MX1,ZBP1,IFIT3,C1QC,GBP1,LAG3,LGALS9,B2M,IFNL1,CXCL10,C9,IFI16,DDX58,CD14,TLR5,TNFRSF1B,MPO,H2BC21,H2BC12,DHX58,PSMA2,PGLYRP2,CSF1,HP,CD226,VIM,RTP4,SERPING1,HRG,PLA2G2A,CXCL11,PRTN3,CTSG,VSIG4,NMI,CR1,CLEC7A,SIRT2,LBP,STAT1,TREM1,HAVCR2,CCL17,AIMP1,COLEC12,IL22RA1,APOA4,C4A,CFP,CD74,CR2,IL12RB1,FCGR1A,IFNA4,IFNL3,DCLK1,LEAP2,ILF3,LILRB2,PCK2,CCL7,XRCC6,MICB,A2M,PSPC1,IL18BP,IFNA7,TREML1,CC…
positive regulation of biological process	306	2612	1.3	0.047	0.00151483	ISG15,ZBP1,C1QC,GBP1,MAP2K4,LAG3,LGALS9,B2M,CAT,NADK,IFNL1,CXCL10,CDON,WARS1,HSPA1A,SAA1,C9,LCP1,AZGP1,IFI16,DDX58,CD14,TLR5,CPB2,TNFRSF1B,RBP4,HEXB,TRA2B,INHA,CLEC11A,RELN,FLRT2,DHX58,ANTXR1,MAP3K11,KLKB1,GHR,NPS,PRSS8,MDK,CSF1,HP,CD226,VIM,BMP10,IL18R1,LRRC15,CTSD,CRABP2,CLSTN3,SERPING1,AGRN,HRG,EPHA4,SEMA4A,PLA2G2A,CXCL11,ROR1,RACGAP1,PRTN3,EPHA10,CTSG,HMOX1,FOLR2,MGAT5,CDK2,VSIG4,PLA2G7,NPPA,…
negative regulation of muscle cell apoptotic process	8	23	4.7	0.047	0.00151965	MDK,HMOX1,PPP1R10,APOH,IGF1,BMP7,HSPB6,ILK
fibrinolysis	8	23	4.7	0.047	0.00151965	CPB2,KLKB1,SERPING1,HRG,APOH,PLAT,FAP,F2
response to external biotic stimulus	105	775	1.4	0.047	0.00153334	ISG15,MX1,ZBP1,IFIT3,C1QC,GBP1,LAG3,LGALS9,B2M,IFNL1,CXCL10,C9,IFI16,DDX58,CD14,TLR5,TNFRSF1B,MPO,H2BC21,H2BC12,DHX58,PSMA2,PGLYRP2,CSF1,HP,CD226,VIM,RTP4,SERPING1,HRG,PLA2G2A,CXCL11,PRTN3,CTSG,VSIG4,NMI,CR1,CLEC7A,SIRT2,LBP,STAT1,TREM1,HAVCR2,CCL17,AIMP1,COLEC12,IL22RA1,APOA4,C4A,CFP,CD74,CR2,IL12RB1,FCGR1A,IFNA4,IFNL3,DCLK1,LEAP2,ILF3,LILRB2,PCK2,CCL7,XRCC6,MICB,A2M,PSPC1,IL18BP,IFNA7,TREML1,CC…
blood coagulation	27	144	2	0.047	0.001534	SAA1,CPB2,F9,KLKB1,HGFAC,SERPING1,HRG,MERTK,KNG1,EPHB2,APOH,PLAT,ENTPD1,FAP,COMP,VWF,TREML1,F13A1,F2,PLAUR,F13B,ANXA5,PROC,GP5,PRKCA,UBASH3B,ILK
regulation of hemostasis	13	51	3	0.049	0.00162258	CPB2,KLKB1,SERPING1,HRG,KNG1,EPHB2,APOH,PLAT,FAP,COMP,F2,PROC,UBASH3B
innate immune response in mucosa	6	14	6.5	0.053	0.00175486	H2BC21,H2BC12,APOA4,DEFA3,CAMP,DEFA1
regulation of developmental process	149	1165	1.4	0.054	0.0018104	ISG15,C1QC,GBP1,LAG3,LGALS9,B2M,IFNL1,CXCL10,CDON,WARS1,HSPA1A,TNFRSF1B,RBP4,HEXB,LRRC4C,INHA,RELN,FLRT2,PRTG,GHR,PGLYRP2,MDK,CSF1,BMP10,CRABP2,CLSTN3,AGRN,HRG,EPHA4,SEMA4A,PLA2G2A,ROR1,RACGAP1,HMOX1,CHAD,KLK8,CR1,EFNB3,CLEC7A,SIRT2,TNFRSF11B,CTHRC1,STAT1,IL15RA,CCL17,INSR,VWC2,PRKCZ,DDR2,NTRK2,FTO,CD74,GLUL,IL12RB1,APOA1,NPTN,KITLG,EPHB2,APOH,EFNB2,SCGB3A1,LILRB2,TNFSF13B,CNTN4,ISLR2,SLITRK1,GDF…
coagulation	27	146	2	0.054	0.00189299	SAA1,CPB2,F9,KLKB1,HGFAC,SERPING1,HRG,MERTK,KNG1,EPHB2,APOH,PLAT,ENTPD1,FAP,COMP,VWF,TREML1,F13A1,F2,PLAUR,F13B,ANXA5,PROC,GP5,PRKCA,UBASH3B,ILK
negative regulation of complement activation	5	10	8.7	0.054	0.00190541	SERPING1,VSIG4,CR1,CR2,A2M
dendrite self-avoidance	5	10	8.7	0.054	0.00190541	BSG,NPTN,CNTN6,CNTN4,ROBO4
collagen metabolic process	14	58	2.8	0.054	0.00191639	VIM,MRC2,PRTN3,MMP17,MMP2,TNXB,FAP,FURIN,F2,VSIR,RCN3,MMP12,CTSB,ARG1
collagen catabolic process	9	29	3.9	0.054	0.00194208	MRC2,PRTN3,MMP17,MMP2,FAP,FURIN,VSIR,MMP12,CTSB
anatomical structure development	285	2421	1.3	0.054	0.00194961	ISG15,C1QC,GBP1,MAP2K4,LAG3,LGALS9,B2M,CAT,IFNL1,CXCL10,CDON,WARS1,HSPA1A,LCP1,IFI16,CPB2,TNFRSF1B,RBP4,COL11A2,HEXB,LRRC4C,TRA2B,INHA,CDH20,RELN,FLRT2,TLL1,ANTXR1,PRTG,CDNF,GHR,PGLYRP2,UGP2,MDK,CRTAC1,CSF1,VIM,BMP10,IL18R1,CRABP2,CLSTN3,AGRN,HRG,EPHA4,SEMA4A,ROR1,RACGAP1,GFRA3,PRTN3,EPHA10,LRIG3,HMOX1,NPPA,CHAD,KLK8,UNC5D,CR1,EFNB3,CLEC7A,TRAPPC6B,MERTK,SIRT2,IGF1R,NELFA,TNFRSF11B,CTHRC1,B4GALT6…
regulation of coagulation	13	52	2.9	0.054	0.00196322	CPB2,KLKB1,SERPING1,HRG,KNG1,EPHB2,APOH,PLAT,FAP,F2,ANXA5,PROC,UBASH3B
biological process involved in interaction with symbiont	13	52	2.9	0.054	0.00196322	HRG,CTSG,TREM1,IGF2R,CCL8,F2,HSPA8,CFHR1,CAMP,CRP,ELANE,ARG1,DEFA1
cell migration	104	772	1.4	0.054	0.00196533	LGALS9,CXCL10,SAA1,LCP1,DDX58,HEXB,RELN,FLRT2,MDK,CSF1,BMP10,LRRC15,HRG,EPHA4,SEMA4A,CXCL11,GFRA3,PRTN3,HMOX1,MGAT5,PLA2G7,UNC5D,CLEC7A,MERTK,IGF1R,LBP,CTHRC1,TREM1,BSG,CCL17,AIMP1,INSR,PRKCZ,DDR2,NTRK2,CD74,DDR1,GLUL,APOA1,KITLG,DCLK1,ITGB7,EPHB2,APOH,EFNB2,CD300A,PLAT,MSMP,ITGAV,NOG,CCL7,LDLRAD4,FGF19,STC1,FAP,IL1R1,KIT,NTN1,DCC,CCL8,IGFBP5,SMOC2,DCN,SOD2,ANGPTL3,ROBO1,ADGRL3,CTSH,HYAL1,VSIR,TH…
regulation of regulatory T cell differentiation	7	19	5.1	0.056	0.00205575	LAG3,LGALS9,MDK,CR1,LILRB2,IL2,VSIR
regulation of cell differentiation	102	756	1.4	0.056	0.0020751	ISG15,C1QC,GBP1,LAG3,LGALS9,B2M,IFNL1,CXCL10,CDON,HSPA1A,TNFRSF1B,INHA,RELN,PRTG,GHR,PGLYRP2,MDK,CSF1,BMP10,CRABP2,EPHA4,SEMA4A,PLA2G2A,CR1,EFNB3,CLEC7A,SIRT2,CTHRC1,STAT1,IL15RA,CCL17,VWC2,PRKCZ,DDR2,NTRK2,FTO,CD74,IL12RB1,APOA1,NPTN,KITLG,EPHB2,EFNB2,LILRB2,CNTN4,ISLR2,SLITRK1,SULT2B1,ITGAV,BOC,NOG,MAFG,LDLRAD4,XRCC6,KIT,NTN1,PTPRD,DCC,MSR1,IL2,TIMP2,IGFBP5,IGF2,LRP4,SFRP4,F2,SOD2,SRSF6,ROBO2,R…
hemostasis	27	147	2	0.056	0.00209804	SAA1,CPB2,F9,KLKB1,HGFAC,SERPING1,HRG,MERTK,KNG1,EPHB2,APOH,PLAT,ENTPD1,FAP,COMP,VWF,TREML1,F13A1,F2,PLAUR,F13B,ANXA5,PROC,GP5,PRKCA,UBASH3B,ILK
response to biotic stimulus	106	791	1.4	0.056	0.00211784	ISG15,MX1,ZBP1,IFIT3,C1QC,GBP1,LAG3,LGALS9,B2M,IFNL1,CXCL10,C9,IFI16,DDX58,CD14,TLR5,TNFRSF1B,MPO,H2BC21,H2BC12,DHX58,PSMA2,PGLYRP2,CSF1,HP,CD226,VIM,RTP4,SERPING1,HRG,PLA2G2A,CXCL11,PRTN3,CTSG,VSIG4,NMI,CR1,CLEC7A,SIRT2,LBP,STAT1,TREM1,HAVCR2,CCL17,AIMP1,COLEC12,IL22RA1,APOA4,C4A,CFP,CD74,CR2,IL12RB1,FCGR1A,IFNA4,IFNL3,DCLK1,LEAP2,ILF3,LILRB2,PCK2,CCL7,XRCC6,MICB,A2M,FAP,PSPC1,IL18BP,IFNA7,TREML…
positive regulation of phosphatidylinositol 3-kinase signaling	15	65	2.6	0.056	0.00216538	CAT,RELN,ROR1,IGF1R,INSR,NTRK2,UNC5B,KIT,DCN,F2,IGF1,PDGFC,ROR2,MYOC,FLT1
negative regulation of response to wounding	15	65	2.6	0.056	0.00216538	CPB2,KLKB1,MDK,SERPING1,HRG,EPHA4,KLK8,KNG1,APOH,PLAT,FAP,F2,WFDC1,PROC,UBASH3B
negative regulation of blood coagulation	11	41	3.2	0.06	0.0023519	CPB2,KLKB1,SERPING1,HRG,KNG1,APOH,PLAT,FAP,F2,PROC,UBASH3B
positive regulation of cell population proliferation	76	538	1.5	0.061	0.00240269	LGALS9,CXCL10,CLEC11A,MDK,CSF1,BMP10,PRTN3,HMOX1,FOLR2,CDK2,CR1,CLEC7A,IGF1R,CTHRC1,STAT1,HAVCR2,INSR,PRKCZ,DDR2,NTRK2,CD74,MMP2,GLUL,IL12RB1,MATK,KITLG,EPHB2,EFNB2,LILRB2,TNFSF13B,GDF9,ITGAV,NOG,CDH3,FGF19,KIT,COMP,NTN1,KLB,IL2,IGFBP5,IGF2,F2,SRSF6,CTSH,LIFR,HYAL1,THBS4,CDH13,IGF1,PDGFC,CNTFR,DLL4,ALDH1A2,CSF1R,CCN1,CAMP,CCL14,NDUFS4,FGFR4,TIMP1,MMP12,DNAJA2,PRL,THPO,PRKCA,ELANE,ARG1,BTC,CXCL12,…
negative regulation of cell adhesion	31	178	1.9	0.061	0.00245298	GBP1,LAG3,LGALS9,IFNL1,MDK,HRG,VSIG4,CR1,HAVCR2,KNG1,CD74,APOA1,IL1RN,EPHB2,CDSN,LILRB2,CD300A,RASA1,IL2,FGL1,VSIR,ADAM22,CDH13,MUC1,SEMA6A,POSTN,MMP12,UBASH3B,ARG1,CXCL12,MYOC
wound healing	42	262	1.7	0.061	0.00245355	SAA1,CPB2,F9,KLKB1,HGFAC,SERPING1,HRG,HMOX1,CLEC7A,MERTK,KNG1,DDR1,EPHB2,APOH,PLAT,ENTPD1,NOG,CDH3,FAP,COMP,VWF,TREML1,F13A1,SMOC2,DCN,F2,SRSF6,PLAUR,F13B,ANXA5,WFDC1,IGF1,PROC,CCN1,POSTN,ANXA6,TIMP1,MMP12,GP5,PRKCA,UBASH3B,ILK
response to nutrient	20	99	2.2	0.061	0.00245386	CAT,CXCL10,HMOX1,FOLR2,DCPS,TNFRSF11B,STAT1,APOA1,STC1,BCHE,SOD2,ALAD,ALDH1A2,BMP7,POSTN,HAMP,ARG1,PENK,OTC,EPO
positive regulation of kinase activity	43	270	1.7	0.061	0.00248699	RELN,MAP3K11,GHR,CSF1,EPHA4,ROR1,EPHA10,MERTK,IGF1R,TNFRSF10B,EPHA6,INSR,PRKCZ,DDR2,NTRK2,CD74,DDR1,FCGR1A,KITLG,EPHB2,CD300A,MUSK,XRCC6,KIT,IL2,IGF2,F2,ROBO1,IGF1,PDGFC,ROR2,CSF1R,CCN1,EPHB6,FGFR4,ELANE,BTC,FLT1,PKD2,TNFRSF10A,ILK,FLT4,EPO
regulation of neurogenesis	32	186	1.8	0.062	0.00257083	B2M,TNFRSF1B,RELN,PRTG,MDK,CRABP2,EPHA4,SEMA4A,EFNB3,SIRT2,NTRK2,NPTN,EPHB2,ISLR2,SLITRK1,NOG,KIT,NTN1,PTPRD,DCC,LRP4,F2,ROBO2,ROBO1,L1CAM,DLL4,SEMA6A,BMP7,SEMA4G,CXCL12,SPINT1,ILK
positive regulation of intracellular signal transduction	72	506	1.5	0.062	0.0025884	LGALS9,CAT,HSPA1A,CD14,RELN,DHX58,MAP3K11,GHR,CSF1,IL18R1,EPHA4,PLA2G2A,ROR1,HMOX1,NPPA,NMI,CLEC7A,IGF1R,TNFRSF10B,HAVCR2,CCL17,INSR,PRKCZ,NTRK2,CD74,APOA1,NPTN,KITLG,UNC5B,ITGAV,CCL7,FGF19,KIT,VWF,KLB,CCL8,TIMP2,IGFBP5,IGF2,DCN,F2,ROBO1,CDH13,IGF1,PDGFC,POMC,TRADD,CCL22,C1QTNF4,ROR2,IAPP,PLA2R1,CSF1R,CPNE1,CCL14,ARL6IP5,FGFR4,HSPA1B,RPS7,SOD1,THPO,PRKCA,S100A9,ELANE,MYOC,FLT1,MCL1,NR3C2,ILK,PRKC…
inflammatory response	66	457	1.5	0.065	0.00270751	ZBP1,LGALS9,CXCL10,SAA1,IFI16,CD14,TLR5,TNFRSF1B,SAA2,KLKB1,SERPINA3,PGLYRP2,MDK,CSF1,HP,PSMB4,IL18R1,PLA2G2A,CXCL11,HMOX1,FOLR2,PLA2G7,NPPA,NMI,CLEC7A,LBP,TREM1,HAVCR2,CCL17,AIMP1,KNG1,PRKCZ,C4A,APOA1,IL1RN,IL22RA2,MSMP,CCL7,IL1R1,KIT,SAA4,CCL8,IL2,FURIN,F2,APOL2,HYAL1,WFDC1,IGF1,TRADD,CCL22,ACP5,PROC,CSF1R,TPST1,IL1RL1,OLR1,CCL14,SIGLEC1,HAMP,CRP,TIMP1,SOD1,S100A9,ELANE,EPO
cellular response to cytokine stimulus	68	474	1.5	0.065	0.00277066	ISG15,MX1,ZBP1,IFIT3,GBP1,LGALS9,CXCL10,HSPA1A,IFI16,TNFRSF1B,LILRA1,GHR,SRSF7,CSF1,VIM,IL18R1,CXCL11,CTSG,NMI,LILRA3,STAT1,IL15RA,KHSRP,CCL17,IL22RA1,CD74,IL12RB1,IFNA4,APOA1,IL1RN,IL22RA2,LILRB2,TNFSF13B,ADAM23,PCK2,CCL7,NCL,IL1R1,KIT,IL18BP,IFNA7,CCL8,IFNA1,ROBO1,LIFR,HYAL1,ASAH2,TRADD,CNTFR,CCL22,C1QTNF4,ALAD,CSF1R,IL1RL1,POSTN,CAMP,CPNE1,CCL14,HAMP,HSPA1B,LILRA6,MMP12,THPO,ARG1,CXCL12,PMM1,Y…
cytolysis	8	25	4.1	0.065	0.00278018	C9,HRG,PLA2G2A,CR1,LBP,MICB,F2,CFHR1
regulation of defense response	53	352	1.6	0.068	0.00292159	ISG15,ZBP1,LAG3,LGALS9,SAA1,IFI16,DDX58,TNFRSF1B,DHX58,KLKB1,PGLYRP2,MDK,PSMB4,CD226,SERPING1,PLA2G2A,VSIG4,PLA2G7,NPPA,NMI,CR1,CLEC7A,SIRT2,LBP,STAT1,HAVCR2,IL12RB1,APOA1,IL22RA2,XRCC6,MICB,A2M,IL1R1,PSPC1,IL2,FURIN,FCN1,WFDC1,IGF1,TRADD,ACP5,PROC,IL1RL1,KLK7,HAMP,MMP12,DTX3L,SOD1,S100A9,ELANE,ARG1,PENK,NPLOC4
regulation of axonogenesis	19	94	2.2	0.072	0.00309722	LRRC4C,CRABP2,EPHA4,SEMA4A,EFNB3,NTRK2,EPHB2,ISLR2,SLITRK1,NTN1,DCC,LRP4,ROBO2,ROBO1,L1CAM,SEMA6A,SEMA4G,CXCL12,ILK
positive regulation of immune response	47	305	1.6	0.072	0.00314349	ZBP1,C1QC,GBP1,LAG3,LGALS9,B2M,IFNL1,C9,AZGP1,IFI16,CD226,IL18R1,SERPING1,HRG,CTSG,VSIG4,NPPA,NMI,CR1,CLEC7A,LBP,HAVCR2,PRKCZ,C4A,CFP,CD74,CR2,IL12RB1,IFNL3,TNFSF13B,CD300A,XRCC6,MICB,A2M,IL1R1,PSPC1,IL2,FCN1,FCN3,CFHR1,KLK7,CRP,MMP12,ELANE,ARG1,C1R,PRKCB
positive regulation of transferase activity	48	313	1.6	0.072	0.00314735	RELN,MAP3K11,GHR,CSF1,EPHA4,ROR1,EPHA10,MERTK,IGF1R,TNFRSF10B,EPHA6,INSR,PRKCZ,DDR2,NTRK2,CD74,DDR1,FCGR1A,KITLG,PCNA,EPHB2,CD300A,MUSK,XRCC6,KIT,IL2,IGF2,F2,ROBO1,IGF1,PDGFC,ROR2,NEK7,CSF1R,CCN1,HNRNPA2B1,None,EPHB6,FGFR4,DTX3L,ELANE,BTC,FLT1,PKD2,TNFRSF10A,ILK,FLT4,EPO
central nervous system projection neuron axonogenesis	5	11	7.3	0.072	0.00319757	EPHA4,DCLK1,EPHB2,DCC,EPHB6
negative regulation of immune system process	41	258	1.7	0.073	0.00323719	ISG15,C1QC,GBP1,LAG3,LGALS9,IFNL1,IFI16,INHA,DHX58,PGLYRP2,MDK,PSMB4,SERPING1,HMOX1,VSIG4,NMI,CR1,MERTK,SIRT2,HAVCR2,CD74,CR2,APOA1,KITLG,LILRB2,CD300A,LST1,MICB,A2M,IL2,FURIN,FGL1,VSIR,IL1RL1,LILRA6,MMP12,UBASH3B,ARG1,CXCL12,NPLOC4,INHBA
adaptive immune response	43	274	1.7	0.074	0.00330088	C1QC,LAG3,B2M,C9,AZGP1,TNFRSF1B,LILRA1,CD226,IL18R1,SERPING1,SEMA4A,FCRL4,CD48,LILRA3,CR1,CLEC7A,TREM1,HAVCR2,PRKCZ,C4A,CD74,CR2,IL12RB1,IFNA4,LILRB2,TNFSF13B,MICB,IL1R1,IL18BP,IFNA7,IL2,IFNA1,FGL1,CTSH,HPRT1,RORC,UNG,IL1RL1,CRP,LILRA6,ARG1,C1R,PRKCB
regulation of response to stimulus	215	1784	1.3	0.074	0.00334147	ISG15,ZBP1,C1QC,GBP1,MAP2K4,LAG3,LGALS9,B2M,CAT,IFNL1,CXCL10,HSPA1A,SAA1,C9,AZGP1,IFI16,DDX58,CD14,TLR5,CPB2,TNFRSF1B,INHA,RELN,DHX58,MAP3K11,KLKB1,GHR,PGLYRP2,MDK,CSF1,PSMB4,CD226,BMP10,IL18R1,SERPING1,HRG,EPHA4,SEMA4A,PLA2G2A,ROR1,RACGAP1,CTSG,HMOX1,MGAT5,VSIG4,CD48,PLA2G7,NPPA,NMI,KLK8,CR1,CLEC7A,SIRT2,IGF1R,LBP,TNFRSF10B,PPP1R10,CTHRC1,STAT1,RNF146,HAVCR2,CCL17,INSR,COLEC12,KNG1,RUVBL1,VWC2,P…
immune system process	166	1336	1.3	0.074	0.0034079	ISG15,MX1,ZBP1,IFIT3,C1QC,GBP1,MAP2K4,LAG3,LGALS9,B2M,IFNL1,CXCL10,CD300C,HSPA1A,SAA1,C9,LCP1,AZGP1,IFI16,DDX58,CD14,TLR5,TNFRSF1B,MPO,LILRA1,RBP4,H2BC21,H2BC12,INHA,DHX58,PGLYRP2,MDK,CSF1,HP,PSMB4,CD226,VIM,IL18R1,CTSD,RTP4,SERPING1,HRG,SEMA4A,PLA2G2A,CXCL11,PRTN3,FCRL4,CTSG,HMOX1,VSIG4,CD48,PLA2G7,NPPA,NMI,FTH1,LILRA3,CR1,EFNB3,CLEC7A,MERTK,SIRT2,IGF1R,LBP,STAT1,IL15RA,TREM1,BSG,HAVCR2,CCL17,AI…
defense response to fungus	10	37	3.2	0.074	0.00346915	MPO,HRG,CTSG,CLEC7A,DEFA3,HAMP,S100A9,ELANE,ARG1,DEFA1
neuron projection development	70	495	1.5	0.074	0.00347411	B2M,LRRC4C,RELN,FLRT2,CDNF,MDK,CRTAC1,VIM,CRABP2,EPHA4,SEMA4A,ROR1,GFRA3,EPHA10,KLK8,UNC5D,EFNB3,CTHRC1,B4GALT6,BSG,CNTN1,EPHA6,PRKCZ,NTRK2,WDR5,DDR1,APOA1,NPTN,DCLK1,UNC5B,EPHB2,CNTN6,EFNB2,CNTN4,ISLR2,SLITRK1,BOC,LST1,SLITRK5,NOG,OMG,NTN1,PTPRD,DCC,NRXN3,IL2,CHL1,LRP4,ROBO2,ROBO1,HPRT1,ATP1B2,GPC2,ROR2,L1CAM,SEMA6A,ROBO4,BMP7,POSTN,CPNE1,EPHB6,SEMA4G,SOD1,S100A9,CXCL12,MYOC,VASP,ILK,SLITRK3,EPO
regulation of blood coagulation	12	49	2.8	0.074	0.00348353	CPB2,KLKB1,SERPING1,HRG,KNG1,EPHB2,APOH,PLAT,FAP,F2,PROC,UBASH3B
regulation of tissue remodeling	12	49	2.8	0.074	0.00348353	MDK,HRG,TNFRSF11B,DDR2,IL2,THBS4,IAPP,CSF1R,HAMP,PRKCA,UBASH3B,FLT4
peptidyl-tyrosine modification	42	267	1.7	0.074	0.00351042	MAP2K4,IFNL1,RELN,GHR,HRG,EPHA4,ROR1,EPHA10,CLEC7A,MERTK,IGF1R,CNTN1,EPHA6,INSR,PRKCZ,DDR2,NTRK2,CD74,DDR1,MATK,FCGR1A,KITLG,EPHB2,IL22RA2,CD300A,MUSK,KIT,IL2,IGF2,LRP4,THBS4,IGF1,PDGFC,ROR2,CSF1R,TPST1,EPHB6,FGFR4,BTC,FLT1,FLT4,EPO
positive regulation of cell differentiation	66	462	1.5	0.074	0.00354002	ISG15,LGALS9,CDON,HSPA1A,TNFRSF1B,RELN,GHR,MDK,CSF1,BMP10,CRABP2,EPHA4,PLA2G2A,CR1,CLEC7A,SIRT2,CTHRC1,STAT1,IL15RA,VWC2,PRKCZ,DDR2,NTRK2,CD74,IL12RB1,APOA1,NPTN,KITLG,EPHB2,EFNB2,LILRB2,ISLR2,SLITRK1,SULT2B1,BOC,XRCC6,KIT,NTN1,PTPRD,MSR1,IL2,TIMP2,SFRP4,SOD2,ROBO2,ROBO1,VSIR,IGF1,ROR2,L1CAM,PROC,BMP7,OLFM4,CCN1,CPNE1,HAMP,HSPA1B,THPO,PRKCA,BTC,CXCL12,MYOC,SPINT1,ILK,EPO,INHBA,ARPC2
developmental process	303	2615	1.3	0.076	0.00365889	ISG15,C1QC,GBP1,MAP2K4,LAG3,LGALS9,B2M,CAT,IFNL1,CXCL10,CDON,WARS1,HSPA1A,LCP1,IFI16,CPB2,TNFRSF1B,MPO,RBP4,COL11A2,HEXB,LRRC4C,TRA2B,INHA,CDH20,RELN,FLRT2,TLL1,ANTXR1,PRTG,CDNF,GHR,PGLYRP2,UGP2,MDK,CRTAC1,CSF1,VIM,BMP10,IL18R1,MRC2,CRABP2,CLSTN3,SERPING1,AGRN,HRG,EPHA4,SEMA4A,PLA2G2A,ROR1,RACGAP1,GFRA3,PRTN3,EPHA10,LRIG3,HMOX1,CDK2,NPPA,CHAD,KLK8,UNC5D,CR1,EFNB3,CLEC7A,TRAPPC6B,MERTK,SIRT2,IGF1R…
enzyme linked receptor protein signaling pathway	77	555	1.4	0.076	0.00367223	HSPA1A,INHA,FLRT2,GHR,CSF1,VIM,BMP10,HRG,EPHA4,GFRA3,EPHA10,NPPA,EFNB3,MERTK,SIRT2,IGF1R,EPHA6,INSR,IGF2R,VWC2,PRKCZ,DDR2,NTRK2,MMP2,DDR1,NPTN,PIGR,EPHB2,EFNB2,PLAT,GDF9,NOG,CDH3,LDLRAD4,RASA1,MUSK,FGF19,SFRP5,KIT,COMP,PTPRD,KLB,SUB1,IGFBP5,FMOD,IGF2,SMOC2,DCN,SFRP4,FURIN,PLAUR,ROBO1,LIFR,CDH13,IGF1,PDGFC,GFRA1,TRADD,ANGPTL1,ROR2,CSF1R,SEMA6A,BMP7,CCN1,EPHB6,FGFR4,HSPA1B,UBASH3B,BTC,MYOC,FLT1,LEF…
leukocyte mediated immunity	36	221	1.7	0.077	0.00372964	C1QC,LAG3,LGALS9,B2M,C9,AZGP1,DDX58,TNFRSF1B,CD226,IL18R1,SERPING1,CTSG,HMOX1,NPPA,CR1,CLEC7A,TREM1,HAVCR2,PRKCZ,C4A,CD74,CR2,IL12RB1,CD300A,IL1R1,KIT,IL2,F2,CTSH,HPRT1,UNG,CRP,ELANE,ARG1,C1R,S100A13
myelination in peripheral nervous system	6	16	5.2	0.079	0.00390428	SIRT2,NTRK2,ADAM22,SOD1,MYOC,ILK
peripheral nervous system axon ensheathment	6	16	5.2	0.079	0.00390428	SIRT2,NTRK2,ADAM22,SOD1,MYOC,ILK
mucosal immune response	7	21	4.4	0.079	0.00394564	H2BC21,H2BC12,APOA4,PIGR,DEFA3,CAMP,DEFA1
regulatory T cell differentiation	7	21	4.4	0.079	0.00394564	LAG3,LGALS9,MDK,CR1,LILRB2,IL2,VSIR
behavior	40	253	1.7	0.079	0.00396577	B2M,HEXB,RELN,SNCG,NPS,MDK,EPHA4,MYG1,KLK8,EFNB3,INSR,PRKCZ,NTRK2,CALB1,NPTN,EPHB2,LILRB2,VWA1,SLITRK1,PYY,MAFG,MUSK,KIT,NRXN3,BCHE,ADAM22,THBS4,HPRT1,ATP1B2,CNTFR,HPGDS,IAPP,REN,ARL6IP5,SOD1,CXCL12,PENK,NRGN,OBP2B,HOMER2
negative regulation of mast cell degranulation	3	4	26.1	0.079	0.00409568	LGALS9,HMOX1,CD300A
positive regulation of long-term neuronal synaptic plasticity	3	4	26.1	0.079	0.00409568	NPTN,EPHB2,KIT
synaptic assembly at neuromuscular junction	3	4	26.1	0.079	0.00409568	AGRN,MUSK,LRP4
neutrophil-mediated killing of gram-negative bacterium	3	4	26.1	0.079	0.00409568	TREM1,F2,ELANE
positive regulation of response to cytokine stimulus	9	32	3.4	0.079	0.00409801	ZBP1,HSPA1A,DDX58,CSF1,CD74,IL1R1,C1QTNF4,CPNE1,HSPA1B,MMP12
adaptive immune response based on somatic recombination of immune receptors built from immunoglobulin superfamily domains	29	169	1.8	0.079	0.00416586	C1QC,B2M,C9,AZGP1,TNFRSF1B,CD226,IL18R1,SERPING1,SEMA4A,CR1,CLEC7A,HAVCR2,PRKCZ,C4A,CD74,CR2,IL12RB1,TNFSF13B,IL1R1,IL18BP,IL2,CTSH,HPRT1,RORC,UNG,IL1RL1,CRP,ARG1,C1R
movement of cell or subcellular component	124	966	1.3	0.08	0.0042168	LGALS9,CXCL10,SAA1,LCP1,DDX58,HEXB,RELN,FLRT2,MDK,CSF1,BMP10,LRRC15,HRG,EPHA4,SEMA4A,CXCL11,GFRA3,PRTN3,EPHA10,HMOX1,MGAT5,PLA2G7,UNC5D,EFNB3,CLEC7A,MERTK,IGF1R,LBP,CTHRC1,TREM1,BSG,CCL17,EPHA6,AIMP1,INSR,DSC2,PRKCZ,DDR2,NTRK2,CD74,DDR1,GLUL,APOA1,NPTN,KITLG,DCLK1,KIF3A,ITGB7,UNC5B,EPHB2,CNTN6,APOH,EFNB2,CNTN4,CD300A,PLAT,MSMP,DSTN,ITGAV,BOC,NOG,CCL7,LDLRAD4,FGF19,STC1,FAP,IL1R1,KIT,NTN1,DCC,CCL8…
positive regulation of cellular process	278	2385	1.3	0.085	0.00451099	ISG15,ZBP1,MAP2K4,LAG3,LGALS9,B2M,CAT,NADK,IFNL1,CXCL10,CDON,WARS1,HSPA1A,SAA1,LCP1,AZGP1,IFI16,DDX58,CD14,TLR5,CPB2,TNFRSF1B,RBP4,HEXB,TRA2B,INHA,CLEC11A,RELN,FLRT2,DHX58,ANTXR1,MAP3K11,KLKB1,GHR,NPS,MDK,CSF1,HP,CD226,VIM,BMP10,IL18R1,LRRC15,CTSD,CRABP2,CLSTN3,AGRN,HRG,EPHA4,SEMA4A,PLA2G2A,CXCL11,ROR1,RACGAP1,PRTN3,EPHA10,HMOX1,FOLR2,MGAT5,CDK2,PLA2G7,NPPA,NMI,H2AZ1,DCPS,CR1,EFNB3,CLEC7A,MERTK,S…
response to extracellular stimulus	40	255	1.7	0.085	0.00456348	CAT,CXCL10,IFI16,MPO,GHR,CLPSL1,HMOX1,FOLR2,DCPS,SIRT2,TNFRSF11B,DCTPP1,STAT1,UPP1,GLUL,APOA1,PCK2,CTSV,STC1,BCHE,GABARAPL1,SOD2,ASGR1,GABARAP,HSPA8,POMC,ALAD,ALDH1A2,AOC1,BMP7,POSTN,HAMP,ATG7,PRL,SOD1,ARG1,PENK,OTC,EPO,INHBB
transmembrane receptor protein tyrosine kinase signaling pathway	55	376	1.5	0.086	0.00461532	FLRT2,GHR,CSF1,HRG,EPHA4,GFRA3,EPHA10,EFNB3,MERTK,SIRT2,IGF1R,EPHA6,INSR,IGF2R,PRKCZ,DDR2,NTRK2,MMP2,DDR1,NPTN,PIGR,EPHB2,EFNB2,PLAT,NOG,CDH3,RASA1,MUSK,FGF19,KIT,KLB,IGFBP5,IGF2,SMOC2,DCN,PLAUR,ROBO1,CDH13,IGF1,PDGFC,GFRA1,TRADD,ANGPTL1,ROR2,CSF1R,SEMA6A,EPHB6,FGFR4,UBASH3B,BTC,MYOC,FLT1,PRKCB,FLT4,ESM1
tube development	75	543	1.4	0.086	0.00464244	CAT,CXCL10,WARS1,RBP4,MDK,CSF1,HRG,EPHA4,SEMA4A,HMOX1,CTHRC1,STAT1,BSG,AIMP1,NTRK2,CALB1,MMP2,DDR1,GLUL,UNC5B,EPHB2,APOH,EFNB2,ITGAV,NOG,PYY,RASA1,NCL,SFRP5,FAP,KIT,COMP,NTN1,TYMP,IGFBP5,SMOC2,DCN,SRSF6,ANGPTL3,ROBO2,ROBO1,CTSH,HYAL1,COL15A1,THBS4,CDH13,PDGFC,POFUT1,DLL4,MFGE8,ALDH1A2,CSF1R,SEMA6A,ROBO4,BMP7,CCN1,CAMP,RCN3,RPS7,MMP12,PRL,HSPB6,PRKCA,ARG1,FLT1,CALD1,THBS2,PKD2,SPINT1,VASP,ILK,PRKC…
positive regulation of cytokine-mediated signaling pathway	8	27	3.7	0.087	0.00473575	ZBP1,HSPA1A,CSF1,CD74,IL1R1,C1QTNF4,CPNE1,HSPA1B,MMP12
positive regulation of developmental process	92	689	1.4	0.087	0.00474888	ISG15,LGALS9,B2M,CDON,HSPA1A,TNFRSF1B,RELN,FLRT2,GHR,MDK,CSF1,BMP10,CRABP2,CLSTN3,AGRN,EPHA4,SEMA4A,PLA2G2A,HMOX1,CR1,CLEC7A,SIRT2,CTHRC1,STAT1,IL15RA,INSR,VWC2,PRKCZ,DDR2,NTRK2,CD74,IL12RB1,APOA1,NPTN,KITLG,EPHB2,EFNB2,SCGB3A1,LILRB2,TNFSF13B,ISLR2,SLITRK1,SULT2B1,BOC,NOG,XRCC6,KIT,NTN1,PTPRD,MSR1,IL2,TIMP2,IGF2,SMOC2,DCN,SFRP4,SOD2,ANGPTL3,ROBO2,ROBO1,CTSH,HYAL1,VSIR,IGF1,TRADD,ROR2,L1CAM,PROC,…
peptidyl-tyrosine phosphorylation	41	264	1.6	0.088	0.00491793	MAP2K4,IFNL1,RELN,GHR,HRG,EPHA4,ROR1,EPHA10,CLEC7A,MERTK,IGF1R,CNTN1,EPHA6,INSR,PRKCZ,DDR2,NTRK2,CD74,DDR1,MATK,FCGR1A,KITLG,EPHB2,IL22RA2,CD300A,MUSK,KIT,IL2,IGF2,LRP4,THBS4,IGF1,PDGFC,ROR2,CSF1R,EPHB6,FGFR4,BTC,FLT1,FLT4,EPO
regulation of cell development	41	264	1.6	0.088	0.00491793	GBP1,B2M,TNFRSF1B,RELN,PRTG,MDK,CRABP2,EPHA4,SEMA4A,EFNB3,CLEC7A,SIRT2,NTRK2,APOA1,NPTN,EPHB2,ISLR2,SLITRK1,NOG,KIT,NTN1,PTPRD,DCC,LRP4,F2,ROBO2,ROBO1,IGF1,L1CAM,DLL4,PROC,SEMA6A,BMP7,OLFM4,POSTN,SEMA4G,CXCL12,MYOC,SPINT1,ILK,ARPC2
negative regulation of cell population proliferation	54	369	1.5	0.088	0.00494016	IFIT3,LGALS9,B2M,IFNL1,WARS1,RBBP4,HSPA1A,AZGP1,CPB2,RBP4,HRG,HMOX1,VSIG4,NMI,FTH1,CR1,SIRT2,STAT1,HAVCR2,AIMP1,DDR1,TNFRSF8,APOH,LILRB2,CD300A,SULT2B1,LST1,NOG,SFRP5,FAP,CCL8,IL2,BCHE,TIMP2,IGFBP5,SFRP4,SOD2,ROBO1,WFDC1,VSIR,CDH13,ROR2,DLL4,ALDH1A2,BMP7,CRP,HSPA1B,PRL,B4GALT7,ARG1,FLT1,PKD2,SPINT1,ILK,INHBA
negative regulation of lymphocyte activation	19	98	2.1	0.088	0.00501796	LAG3,LGALS9,IFNL1,INHA,PGLYRP2,MDK,VSIG4,CR1,MERTK,HAVCR2,CD74,LILRB2,CD300A,LST1,IL2,FGL1,VSIR,ARG1,INHBA
positive regulation of regulatory T cell differentiation	5	12	6.2	0.088	0.00501889	LGALS9,CR1,LILRB2,IL2,VSIR
regulation of vascular endothelial growth factor signaling pathway	5	12	6.2	0.088	0.00501889	HRG,SMOC2,DCN,ROBO1,SEMA6A
regulation of cellular response to vascular endothelial growth factor stimulus	5	12	6.2	0.088	0.00501889	HRG,SMOC2,DCN,ROBO1,SEMA6A
positive regulation of synapse assembly	11	45	2.8	0.089	0.00515186	FLRT2,CLSTN3,AGRN,SEMA4A,NTRK2,EPHB2,SLITRK1,PTPRD,CBLN2,THBS2,SLITRK3
cell killing	23	127	1.9	0.09	0.00521724	LAG3,LGALS9,B2M,C9,AZGP1,H2BC12,CD226,HRG,CTSG,CLEC7A,TREM1,HAVCR2,IL12RB1,F2,CTSH,HPRT1,DEFA3,CFHR1,CAMP,HAMP,ELANE,ARG1,DEFA1
cellular carbohydrate biosynthetic process	10	39	3	0.09	0.00523631	UGP2,INSR,PCK2,IGF2,B3GNT8,IGF1,PPP1R3B,FBP1,None,IMPA1
receptor signaling pathway via STAT	22	120	2	0.091	0.00535775	IFNL1,GHR,MGAT5,NMI,STAT1,IFNA4,IFNL3,IL22RA2,CD300A,KIT,PTPRD,IFNA7,IL2,IFNA1,F2,IGF1,CSF1R,HAMP,PRL,THPO,PKD2,EPO
viral process	36	226	1.7	0.092	0.00541627	ISG15,MX1,LGALS9,HSPA1A,IFI16,LRRC15,MGAT5,CR1,EFNB3,STAT1,BSG,INSR,IGF2R,CD74,CR2,IFNL3,ITGB7,EFNB2,ILF3,ITGAV,MGAT4B,STAU1,CCL8,FURIN,FCN1,HSPA8,FCN3,ST3GAL2,SIGLEC1,CRP,ATG7,HSPA1B,CTSB,CHMP2B,CHMP1A,CHMP1B,PCBP1
Schwann cell development	6	17	4.8	0.092	0.00551317	SIRT2,NTRK2,ADAM22,SOD1,MYOC,ILK
central nervous system neuron axonogenesis	6	17	4.8	0.092	0.00551317	EPHA4,B4GALT6,DCLK1,EPHB2,DCC,EPHB6
regulation of glycogen metabolic process	6	17	4.8	0.092	0.00551317	INSR,IGF2,IGF1,POMC,PPP1R3B,None
response to nutrient levels	38	242	1.7	0.092	0.00553313	CAT,CXCL10,IFI16,MPO,GHR,CLPSL1,HMOX1,FOLR2,DCPS,SIRT2,TNFRSF11B,STAT1,UPP1,GLUL,APOA1,PCK2,CTSV,STC1,BCHE,GABARAPL1,SOD2,GABARAP,HSPA8,POMC,ALAD,ALDH1A2,AOC1,BMP7,POSTN,HAMP,ATG7,PRL,SOD1,ARG1,PENK,OTC,EPO,INHBB
regulation of spindle assembly	4	8	8.7	0.093	0.00569545	HSPA1A,HSPA1B,CHMP2B,CHMP1A,CHMP1B
trans-synaptic signaling by trans-synaptic complex	4	8	8.7	0.093	0.00569545	EFNB3,NPTN,EPHB2,PTPRD
regulation of mitotic spindle assembly	4	8	8.7	0.093	0.00569545	HSPA1A,HSPA1B,CHMP2B,CHMP1A,CHMP1B
cell-substrate adhesion	33	204	1.7	0.097	0.0059893	GBP1,ANTXR1,MDK,CSF1,HRG,NID2,MERTK,VWC2,PRKCZ,NID1,DDR1,APOA1,ITGB7,TNXB,ITGAV,RASA1,LYVE1,VWF,THBS3,VIT,ANGPTL3,ATP1B2,CDH13,L1CAM,OLFM4,CCN1,POSTN,SIGLEC1,MMP12,EDIL3,MYOC,ILK,ARPC2
