# Supplementary material for: Pregnancy-specific responses to COVID-19 are revealed by high-throughput proteomics of human plasma
Source: Research Square preprint supplement (doi:10.21203/rs.3.rs-1906806/v1), 2022-08-22
Supplement: Supplementary file 2 [file 18e8d90a942a1838703c61a1.xlsx]

## Sheet: TableS1
Supplementary Table 1. Proteins differentially regulated by COVID-19 in pregnant women compared to non-infected pregnant controls.
ID	SYMBOL	Target	TargetFullName	logFC	P.Value	adj.P.Val	Direction
ISG15.14151.4	ISG15	UCRP	Ubiquitin-like protein ISG15	2.67575	1.83278e-19	1.33518e-15	UPinCases
ISG15.14148.2	ISG15	UCRP	Ubiquitin-like protein ISG15	1.93249	2.75809e-18	1.00464e-14	UPinCases
MX1.17460.51	MX1	Mx1	Interferon-induced GTP-binding protein Mx1	4.06225	4.08784e-17	9.92665e-14	UPinCases
ZBP1.22831.11	ZBP1	ZBP1	Z-DNA-binding protein 1	1.83301	6.811e-17	1.24045e-13	UPinCases
IFIT3.13642.90	IFIT3	CIG49	Interferon-induced protein with tetratricopeptide repeats 3	1.76163	2.4207e-12	3.52695e-09	UPinCases
C1QC.14100.63	C1QC	C1QC	Complement C1q subcomponent subunit C	3.73148	7.19298e-12	8.73348e-09	UPinCases
GBP1.15326.64	GBP1	GBP1	Guanylate-binding protein 1	1.24335	1.57886e-11	1.64314e-08	UPinCases
MAP2K4.5242.37	MAP2K4	MP2K4	Dual specificity mitogen-activated protein kinase kinase 4	-1.85074	4.51541e-11	4.09782e-08	DOWNinCases
LAG3.9950.229	LAG3	LAG-3	Lymphocyte activation gene 3 protein	1.29328	5.53374e-11	4.09782e-08	UPinCases
LGALS9.9197.4	LGALS9	LEG9	Galectin-9	0.604211	5.62501e-11	4.09782e-08	UPinCases
B2M.3485.28	B2M	b2-Microglobulin	Beta-2-microglobulin	0.807924	1.95435e-10	1.29431e-07	UPinCases
CAT.3488.64	CAT	Catalase	Catalase	1.09859	3.5109e-10	2.13141e-07	UPinCases
AFM.18196.8	AFM	Afamin	Afamin	-0.57472	4.21147e-10	2.36004e-07	DOWNinCases
AFM.4763.31	AFM	Afamin	Afamin	-0.502932	7.74452e-10	4.02992e-07	DOWNinCases
NADK.13624.17	NADK	NADK	NAD kinase	1.60913	9.12549e-10	4.43195e-07	UPinCases
ITIH2.9326.33	ITIH2	ITI heavy chain H2	Inter-alpha-trypsin inhibitor heavy chain H2	-0.377968	1.06935e-09	4.86888e-07	DOWNinCases
IFNL1.13734.22	IFNL1	IFN-lambda 1	Interferon lambda-1	1.13016	1.56183e-09	6.69288e-07	UPinCases
NUCB1.10451.11	NUCB1	NUCB1	Nucleobindin-1	0.856459	1.98682e-09	7.76494e-07	UPinCases
PCYOX1.6431.68	PCYOX1	PCYOX	Prenylcysteine oxidase 1	-0.95269	2.05617e-09	7.76494e-07	DOWNinCases
CXCL10.4141.79	CXCL10	IP-10	C-X-C motif chemokine 10	1.7913	2.13176e-09	7.76494e-07	UPinCases
CD300C.5066.134	CD300C	CLM6	CMRF35-like molecule 6	0.682468	2.34363e-09	7.81308e-07	UPinCases
CDON.4541.49	CDON	CDON	Cell adhesion molecule-related/down-regulated by oncogenes	-1.04284	2.35947e-09	7.81308e-07	DOWNinCases
WARS1.9870.17	WARS1	SYWC	Tryptophan--tRNA ligase, cytoplasmic	1.01713	5.24407e-09	1.661e-06	UPinCases
RBBP4.15331.47	RBBP4	RBBP4	Histone-binding protein RBBP4	0.983114	5.63302e-09	1.70986e-06	UPinCases
HSPA1A.14237.1	HSPA1A	HSP 70	Heat shock 70 kDa protein 1A	-0.590338	5.89585e-09	1.71805e-06	DOWNinCases
SAA1.15515.2	SAA1	SAA	Serum amyloid A-1 protein	2.21304	8.84225e-09	2.42924e-06	UPinCases
SERPINA4.14105.5	SERPINA4	Kallistatin	Kallistatin	-0.867485	9.00337e-09	2.42924e-06	DOWNinCases
C9.13722.105	C9	C9	Complement component C9	0.367527	1.24159e-08	3.23035e-06	UPinCases
LCP1.9749.190	LCP1	L-plastin	Plastin-2	0.685486	1.3271e-08	3.33376e-06	UPinCases
AZGP1.9312.8	AZGP1	AZGP1	Zinc-alpha-2-glycoprotein	-0.51512	1.48579e-08	3.60799e-06	DOWNinCases
IFI16.13940.19	IFI16	IP16	Gamma-interferon-inducible protein 16	1.13157	1.5522e-08	3.64767e-06	UPinCases
DDX58.12382.2	DDX58	DDX58	Probable ATP-dependent RNA helicase DDX58	1.09158	1.94812e-08	4.43501e-06	UPinCases
H2AC1.22402.12	H2AC1	H2A1A	Histone H2A type 1-A	1.87348	2.40529e-08	5.1537e-06	UPinCases
CD14.8969.49	CD14	CD14	Monocyte differentiation antigen CD14	0.489269	2.7759e-08	5.77783e-06	UPinCases
HID1.24488.8	HID1	HID1	Protein HID1	-0.774939	2.89525e-08	5.85885e-06	DOWNinCases
TLR5.18935.14	TLR5	TLR5	Toll-like receptor 5	0.645422	3.37353e-08	6.63317e-06	UPinCases
CPB2.3518.54	CPB2	TAFI	Carboxypeptidase B2	-0.529333	3.45999e-08	6.63317e-06	DOWNinCases
SERPINA4.3449.58	SERPINA4	Kallistatin	Kallistatin	-0.897973	4.07342e-08	7.60893e-06	DOWNinCases
H2BU1.18823.52	H2BU1	H2B3B	Histone H2B type 3-B	1.91173	4.87847e-08	8.88492e-06	UPinCases
TNFRSF1B.3152.57	TNFRSF1B	TNF sR-II	Tumor necrosis factor receptor superfamily member 1B	0.714387	5.69694e-08	1.01225e-05	UPinCases
MPO.2580.83	MPO	Myeloperoxidase	Myeloperoxidase	1.02309	6.00247e-08	1.04114e-05	UPinCases
LILRA1.21706.29	LILRA1	LIRA1	Leukocyte immunoglobulin-like receptor subfamily A member 1	1.18734	7.72633e-08	1.28742e-05	UPinCases
RBP4.7831.39	RBP4	RBP	Retinol-binding protein 4	-0.666651	7.77575e-08	1.28742e-05	DOWNinCases
H2BC21.22974.25	H2BC21	H2B2E	Histone H2B type 2-E	1.73599	9.74357e-08	1.57738e-05	UPinCases
COL11A2.11278.4	COL11A2	COL11A2	Collagen alpha-2(XI) chain	-1.09494	1.08182e-07	1.70627e-05	DOWNinCases
HEXB.6075.61	HEXB	Hexosaminidase B	Beta-hexosaminidase subunit beta	-0.673394	1.10082e-07	1.70627e-05	DOWNinCases
H2BC12.22403.13	H2BC12	H2B1K	Histone H2B type 1-K	1.86486	1.19379e-07	1.81182e-05	UPinCases
LRRC4C.9369.174	LRRC4C	NGL1	Leucine-rich repeat-containing protein 4C	-0.351974	1.43294e-07	2.1304e-05	DOWNinCases
SAA2.18832.65	SAA2	SAA2	Serum amyloid A-2 protein	2.25741	1.54553e-07	2.19783e-05	UPinCases
TRA2B.12373.73	TRA2B	TRA2B	Transformer-2 protein homolog beta	1.02675	1.54705e-07	2.19783e-05	UPinCases
INHA.25921.3	INHA	Inhibin a subunit	Inhibin a subunit	1.31374	1.5688e-07	2.19783e-05	UPinCases
BAGE3.6442.6	BAGE3	BAGE3	B melanoma antigen 3	-0.726202	1.66912e-07	2.26038e-05	DOWNinCases
SIGLEC7.2742.68	SIGLEC7	Siglec-7	Sialic acid-binding Ig-like lectin 7	0.525304	1.67551e-07	2.26038e-05	UPinCases
H2BC21.14143.8	H2BC21	H2B2E	Histone H2B type 2-E	1.51818	1.71868e-07	2.27648e-05	UPinCases
C9.3060.43	C9	C9	Complement component C9	0.322899	1.99078e-07	2.5898e-05	UPinCases
CDH20.21679.16	CDH20	CAD20	Cadherin-20	-0.335247	2.11856e-07	2.70767e-05	DOWNinCases
F9.5307.12	F9	Coagulation Factor IXab	Coagulation factor IXab	-0.459445	2.7272e-07	3.42546e-05	DOWNinCases
LMNB2.20217.26	LMNB2	Lamin-B2	Lamin-B2	0.970403	2.83229e-07	3.49716e-05	UPinCases
CLEC11A.4500.50	CLEC11A	SCGF-alpha	Stem cell growth factor-alpha	0.787511	3.01212e-07	3.65722e-05	UPinCases
CTAG1A.6931.10	CTAG1A	CTAG1A	Cancer/testis antigen 1	0.944912	3.22677e-07	3.85361e-05	UPinCases
RELN.21713.11	RELN	RELN	Reelin	-0.633339	3.49593e-07	4.09652e-05	DOWNinCases
FLRT2.13122.19	FLRT2	FLRT2	Leucine-rich repeat transmembrane protein FLRT2	-0.633818	3.557e-07	4.09652e-05	DOWNinCases
LAG3.5099.14	LAG3	LAG-3	Lymphocyte activation gene 3 protein	1.10979	3.59886e-07	4.09652e-05	UPinCases
PLAAT2.7822.11	PLAAT2	HRSL2	HRAS-like suppressor 2	0.618394	3.80711e-07	4.26689e-05	UPinCases
PUF60.10575.31	PUF60	PUF60	Poly(U)-binding-splicing factor PUF60	0.76661	3.89716e-07	4.28547e-05	UPinCases
H2AC11.22468.54	H2AC11	Histone H2A type 1	Histone H2A type 1	1.23662	3.94133e-07	4.28547e-05	UPinCases
KLK13.11152.46	KLK13	kallikrein 13	Kallikrein-13	-0.962971	4.04102e-07	4.32924e-05	DOWNinCases
DHX58.14012.17	DHX58	LGP2	Probable ATP-dependent RNA helicase DHX58	0.391203	4.16573e-07	4.37729e-05	UPinCases
TLL1.6383.90	TLL1	TLL1	Tolloid-like protein 1	-0.816419	4.20605e-07	4.37729e-05	DOWNinCases
ANTXR1.10464.6	ANTXR1	ANTR1	Anthrax toxin receptor 1	-0.38922	4.46843e-07	4.58486e-05	DOWNinCases
UBE4A.25073.13	UBE4A	UBE4A	Ubiquitin conjugation factor E4 A	-0.832438	4.74764e-07	4.80369e-05	DOWNinCases
F9.4876.32	F9	Coagulation Factor IX	Coagulation factor IX	-0.413551	4.86073e-07	4.85074e-05	DOWNinCases
PRTG.21397.21	PRTG	PRTG	Protogenin	-0.691207	4.94955e-07	4.87264e-05	DOWNinCases
CA4.14069.61	CA4	Carbonic Anhydrase IV	Carbonic anhydrase 4	-0.322404	5.31451e-07	5.16216e-05	DOWNinCases
MAP3K11.21406.25	MAP3K11	M3K11	Mitogen-activated protein kinase kinase kinase 11	-0.497537	5.71449e-07	5.47764e-05	DOWNinCases
LCP1.17231.1	LCP1	L-plastin	Plastin-2	0.53896	5.82145e-07	5.5077e-05	UPinCases
EWSR1.12988.49	EWSR1	EWS	RNA-binding protein EWS	0.711461	6.48665e-07	6.05836e-05	UPinCases
PSMA2.4280.47	PSMA2	PSA2	Proteasome subunit alpha type-2	0.489765	7.01276e-07	6.4189e-05	UPinCases
KLKB1.4152.58	KLKB1	Prekallikrein	Plasma kallikrein	-0.425233	7.13415e-07	6.4189e-05	DOWNinCases
SNCG.19630.2	SNCG	g-Synuclein	Gamma-synuclein	0.68118	7.13701e-07	6.4189e-05	UPinCases
HSH2D.23531.79	HSH2D	HSH2D	Hematopoietic SH2 domain-containing protein	0.324889	7.81522e-07	6.94316e-05	UPinCases
ITIH1.7955.195	ITIH1	ITI heavy chain H1	Inter-alpha-trypsin inhibitor heavy chain H1	-0.359845	8.02494e-07	7.04358e-05	DOWNinCases
H2AW.14144.3	H2AW	H2A3	Histone H2A type 3	1.80378	8.26589e-07	7.16869e-05	UPinCases
SERPINA3.4153.11	SERPINA3	alpha-1-antichymotrypsin complex	Alpha-1-antichymotrypsin complex	0.895973	9.45032e-07	8.09948e-05	UPinCases
CDNF.4962.52	CDNF	ARMEL	Cerebral dopamine neurotrophic factor	-0.336689	9.72166e-07	8.23515e-05	DOWNinCases
SAA1.4336.2	SAA1	SAA	Serum amyloid A-1 protein	2.81098	1.01588e-06	8.50651e-05	UPinCases
CLEC11A.2966.65	CLEC11A	SCGF-beta	Stem cell growth factor-beta	0.738843	1.04418e-06	8.59554e-05	UPinCases
GHR.2948.58	GHR	Growth hormone receptor	Growth hormone receptor	-0.617758	1.05011e-06	8.59554e-05	DOWNinCases
PGLYRP2.5601.2	PGLYRP2	PGRP-L	N-acetylmuramoyl-L-alanine amidase	-0.828375	1.08827e-06	8.80897e-05	DOWNinCases
NPS.6390.18	NPS	NPS	Neuropeptide S	-0.627981	1.12152e-06	8.97833e-05	DOWNinCases
SRSF7.12987.12	SRSF7	SRSF7	Serine/arginine-rich splicing factor 7	0.690867	1.16239e-06	9.20434e-05	UPinCases
PRSS8.6225.3	PRSS8	Prostasin	Prostasin	-0.57252	1.17922e-06	9.23722e-05	DOWNinCases
UGP2.13939.14	UGP2	UGPA1	UTP--glucose-1-phosphate uridylyltransferase	1.09272	1.23958e-06	9.54876e-05	UPinCases
MDK.2911.27	MDK	Midkine	Midkine	1.28706	1.24521e-06	9.54876e-05	UPinCases
CRTAC1.5632.6	CRTAC1	CRAC1	Cartilage acidic protein 1	-0.488738	1.26187e-06	9.57572e-05	DOWNinCases
CSF1.3738.54	CSF1	CSF-1	Macrophage colony-stimulating factor 1	0.568622	1.37462e-06	0.000103238	UPinCases
RBP4.15633.6	RBP4	RBP	Retinol-binding protein 4	-0.718931	1.478e-06	0.00010987	DOWNinCases
HP.7905.30	HP	HPT	Haptoglobin isoform 2	0.384956	1.53412e-06	0.00011289	UPinCases
HP.3054.3	HP	Haptoglobin, Mixed Type	Haptoglobin	0.566886	1.61221e-06	0.000117449	UPinCases
PSMB4.18340.2	PSMB4	Proteasome beta chain	Proteasome subunit beta type-4	0.586968	1.65939e-06	0.00011969	UPinCases
CD226.5062.60	CD226	CD226	CD226 antigen	0.577602	1.78131e-06	0.000127224	UPinCases
VIM.15540.6	VIM	Vimentin	Vimentin	1.18779	1.83174e-06	0.000129556	UPinCases
BMP10.3587.53	BMP10	BMP10	Bone morphogenetic protein 10	0.540746	1.87751e-06	0.000131516	UPinCases
IL18R1.14079.14	IL18R1	IL-18 Ra	Interleukin-18 receptor 1	1.06398	2.06131e-06	0.000143016	UPinCases
ST6GALNAC6.7228.2	ST6GALNAC6	SIA7F	Alpha-N-acetylgalactosaminide alpha-2,6-sialyltransferase 6	-0.463819	2.22172e-06	0.000152691	DOWNinCases
LRRC15.6557.50	LRRC15	LRC15	Leucine-rich repeat-containing protein 15	-0.948518	2.24687e-06	0.000152976	DOWNinCases
MRC2.3041.55	MRC2	MRC2	C-type mannose receptor 2	-0.700125	2.36074e-06	0.000159241	DOWNinCases
CTSD.5508.62	CTSD	Cathepsin D	Cathepsin D	0.774546	2.56609e-06	0.000171505	UPinCases
CRABP2.11696.7	CRABP2	RABP2	Cellular retinoic acid-binding protein 2	-0.908136	2.61573e-06	0.000173232	DOWNinCases
IGDCC4.9793.145	IGDCC4	IGDC4	Immunoglobulin superfamily DCC subclass member 4	-0.645467	2.67807e-06	0.000175763	DOWNinCases
DPY30.13943.38	DPY30	DPY30	Protein dpy-30 homolog	0.74267	2.96664e-06	0.000192964	UPinCases
TMPO.8265.225	TMPO	LAP2B	Lamina-associated polypeptide 2, isoforms beta/gamma	0.873063	3.19385e-06	0.000205513	UPinCases
DEPP1.7178.59	DEPP1	DEPP	Protein DEPP	-0.887324	3.21599e-06	0.000205513	DOWNinCases
RTP4.18315.38	RTP4	RTP4	Receptor-transporting protein 4	1.02041	3.30433e-06	0.000209322	UPinCases
CLSTN3.6291.55	CLSTN3	Alcadein-beta	Calsyntenin-3	0.875769	3.37644e-06	0.000212046	UPinCases
HGFAC.8385.248	HGFAC	HGFA	Hepatocyte growth factor activator	-1.09263	3.5476e-06	0.000220891	DOWNinCases
SERPING1.13710.6	SERPING1	C1-Esterase Inhibitor	Plasma protease C1 inhibitor	0.48315	3.73631e-06	0.00023067	UPinCases
AGRN.15483.377	AGRN	Agrin	Agrin	0.634867	3.82916e-06	0.000234415	UPinCases
TNFRSF1B.8368.102	TNFRSF1B	TNF sR-II	Tumor necrosis factor receptor superfamily member 1B	0.718916	4.32927e-06	0.000262823	UPinCases
HRG.4996.66	HRG	HRG	Histidine-rich glycoprotein	-1.32635	4.46674e-06	0.000268928	DOWNinCases
EPHA4.16288.17	EPHA4	EPHA4	Ephrin type-A receptor 4	-0.545133	4.54429e-06	0.000271354	DOWNinCases
SEMA4A.16915.153	SEMA4A	SEM4A	Semaphorin-4A	0.45845	4.63824e-06	0.000274712	UPinCases
PLA2G2A.2692.74	PLA2G2A	NPS-PLA2	Phospholipase A2, membrane associated	1.38873	4.82677e-06	0.000283573	UPinCases
CXCL11.3038.9	CXCL11	I-TAC	C-X-C motif chemokine 11	1.20991	5.19767e-06	0.00030292	UPinCases
ROR1.2590.69	ROR1	ROR1	Inactive tyrosine-protein kinase transmembrane receptor ROR1	-0.627459	5.87102e-06	0.000339447	DOWNinCases
CLPSL1.9526.3	CLPSL1	COLL1	Colipase-like protein 1	0.875404	5.97322e-06	0.000342637	UPinCases
RACGAP1.13587.10	RACGAP1	RGAP1	Rac GTPase-activating protein 1	-1.05582	6.17211e-06	0.000349955	DOWNinCases
GFRA3.2505.49	GFRA3	GFRa-3	GDNF family receptor alpha-3	0.432078	6.19686e-06	0.000349955	UPinCases
ERH.11614.29	ERH	ERH	Enhancer of rudimentary homolog	0.68724	6.74899e-06	0.000378203	UPinCases
PRTN3.13720.95	PRTN3	Proteinase-3	Myeloblastin	0.694954	6.92491e-06	0.000385099	UPinCases
HGFAC.3617.80	HGFAC	HGFA	Hepatocyte growth factor activator	-0.812418	7.07783e-06	0.000390621	DOWNinCases
IL18R1.3446.7	IL18R1	IL-18 Ra	Interleukin-18 receptor 1	0.878089	7.38678e-06	0.00040252	UPinCases
EPHA10.6036.78	EPHA10	EPHAA	Ephrin type-A receptor 10	0.850208	7.40394e-06	0.00040252	UPinCases
OGFR.24934.96	OGFR	OGFR	Opioid growth factor receptor	0.601531	7.61105e-06	0.000410715	UPinCases
TMEM132D.13416.8	TMEM132D	T132D	Transmembrane protein 132D	-0.552608	7.86569e-06	0.000418267	DOWNinCases
FAM20B.7198.197	FAM20B	FA20B	Glycosaminoglycan xylosylkinase	-0.391239	7.99278e-06	0.000419738	DOWNinCases
ROR1.8474.6	ROR1	ROR1	Inactive tyrosine-protein kinase transmembrane receptor ROR1	-0.735223	8.30068e-06	0.000431932	DOWNinCases
FCRL4.8973.23	FCRL4	FCRL4	Fc receptor-like protein 4	-0.660103	8.51278e-06	0.000439827	DOWNinCases
CTSG.2431.17	CTSG	Cathepsin G	Cathepsin G	0.460755	8.61868e-06	0.000442082	UPinCases
LRIG3.3322.52	LRIG3	LRIG3	Leucine-rich repeats and immunoglobulin-like domains protein 3	-0.628711	8.71139e-06	0.000442082	DOWNinCases
HMOX1.17398.55	HMOX1	HO-1	Heme oxygenase 1	0.518849	8.73848e-06	0.000442082	UPinCases
IFI16.12893.159	IFI16	IP16	Gamma-interferon-inducible protein 16	0.589358	9.06992e-06	0.000455685	UPinCases
MAT2B.18392.19	MAT2B	MAT2B	Methionine adenosyltransferase 2 subunit beta	0.438732	9.8149e-06	0.000486467	UPinCases
FOLR2.15587.20	FOLR2	FOLR2	Folate receptor beta	0.575332	9.81614e-06	0.000486467	UPinCases
MGAT5.21768.9	MGAT5	MGT5A	Alpha-1,6-mannosylglycoprotein 6-beta-N-acetylglucosaminyltransferase A	-0.416178	9.92526e-06	0.000488551	DOWNinCases
GIMAP4.24684.7	GIMAP4	GIMA4	GTPase IMAP family member 4	0.47269	1.0211e-05	0.000499241	UPinCases
PMEL.6472.40	PMEL	GP100	Melanocyte protein PMEL	-0.632288	1.0457e-05	0.000507859	DOWNinCases
CDK2.CCNA2.3357.67	CDK2	CDK2/cyclin A	Cyclin-dependent kinase 2:Cyclin-A2 complex	0.3707	1.06934e-05	0.000515901	UPinCases
VSIG4.17678.28	VSIG4	VSIG4	V-set and immunoglobulin domain-containing protein 4	0.849566	1.14099e-05	0.000542303	UPinCases
CELF2.7245.2	CELF2	CELF2	CUGBP Elav-like family member 2	0.976036	1.14499e-05	0.000542303	UPinCases
VOPP1.14618.26	VOPP1	ECOP	Vesicular, overexpressed in cancer, prosurvival protein 1	-0.3244	1.14934e-05	0.000542303	DOWNinCases
TRAPPC3.14337.1	TRAPPC3	TPPC3	Trafficking protein particle complex subunit 3	0.459869	1.15384e-05	0.000542303	UPinCases
CD48.3292.75	CD48	CD48	CD48 antigen	0.69952	1.2557e-05	0.000586398	UPinCases
PLA2G7.5015.15	PLA2G7	PAFAH	Platelet-activating factor acetylhydrolase	-0.603375	1.27964e-05	0.000593767	DOWNinCases
FTL.15324.58	FTL	Ferritin light chain	Ferritin light chain	1.55252	1.29844e-05	0.00059868	UPinCases
NPPA.5443.62	NPPA	ANP	Atrial natriuretic factor	0.372575	1.38653e-05	0.000633275	UPinCases
SHBG.4929.55	SHBG	SHBG	Sex hormone-binding globulin	-0.513095	1.39385e-05	0.000633275	DOWNinCases
OIT3.6296.36	OIT3	OIT3	Oncoprotein-induced transcript 3 protein	0.769019	1.40657e-05	0.000633275	UPinCases
ZNF230.22838.39	ZNF230	ZN230	Zinc finger protein 230	-0.380435	1.44806e-05	0.000647183	DOWNinCases
QPCT.7849.3	QPCT	Glutaminyl cyclase	Glutaminyl-peptide cyclotransferase	-0.677474	1.57796e-05	0.000690772	DOWNinCases
NMI.17512.2	NMI	NMI	N-myc-interactor	0.733216	1.60246e-05	0.000694876	UPinCases
FTH1.FTL.5934.1	FTH1	Ferritin	Ferritin	1.55848	1.65252e-05	0.000712343	UPinCases
NID2.3633.70	NID2	NID2	Nidogen-2	0.435953	1.70097e-05	0.000728914	UPinCases
H2AZ1.4163.5	H2AZ1	Histone H2A.z	Histone H2A.z	0.659184	1.75184e-05	0.000744591	UPinCases
MYG1.8303.102	MYG1	MYG1	UPF0160 protein MYG1, mitochondrial	0.803937	1.75799e-05	0.000744591	UPinCases
CHAD.13460.4	CHAD	CHAD	Chondroadherin	-0.921468	1.80108e-05	0.000758433	DOWNinCases
DCPS.20106.80	DCPS	DCPS	Scavenger mRNA-decapping enzyme DcpS	0.502119	1.83979e-05	0.00077028	UPinCases
KLK8.13708.56	KLK8	kallikrein 8	Kallikrein-8	-0.650646	1.85536e-05	0.000772362	DOWNinCases
C12orf65.24252.85	C12orf65	CL065	Probable peptide chain release factor C12orf65, mitochondrial	0.397843	1.91524e-05	0.00079015	UPinCases
EPHA4.7190.50	EPHA4	EPHA4	Ephrin type-A receptor 4	-0.559383	1.94997e-05	0.000790707	DOWNinCases
UNC5D.16307.22	UNC5D	UNC5H4	Netrin receptor UNC5D	-0.538097	1.9537e-05	0.000790707	DOWNinCases
LILRA3.6391.52	LILRA3	LIRA3	Leukocyte immunoglobulin-like receptor subfamily A member 3	1.82292	1.99854e-05	0.000803691	UPinCases
TMPRSS15.3189.61	TMPRSS15	Enterokinase	Enteropeptidase	0.328239	2.02133e-05	0.000803691	UPinCases
CR1.19556.12	CR1	Complement receptor type 1	Complement receptor type 1	-0.542973	2.02411e-05	0.000803691	DOWNinCases
EFNB3.2514.65	EFNB3	Ephrin-B3	Ephrin-B3	0.556521	2.02991e-05	0.000803691	UPinCases
MMP17.2838.53	MMP17	MMP-17	Matrix metalloproteinase-17	0.494108	2.06246e-05	0.000812165	UPinCases
CLEC7A.3603.60	CLEC7A	CLC7A	C-type lectin domain family 7 member A	0.401586	2.10121e-05	0.000822975	UPinCases
TRAPPC6B.22812.4	TRAPPC6B	TPC6B	Trafficking protein particle complex subunit 6B	-0.423073	2.15142e-05	0.000838134	DOWNinCases
CAPN13.24915.123	CAPN13	CAN13	Calpain-13	-0.718227	2.18288e-05	0.00084454	DOWNinCases
MERTK.19787.14	MERTK	MER	Proto-oncogene tyrosine-protein kinase MER	0.581274	2.19105e-05	0.00084454	UPinCases
SIRT2.5030.52	SIRT2	SIRT2	NAD-dependent protein deacetylase sirtuin-2	-0.600078	2.27751e-05	0.000864931	DOWNinCases
IGF1R.4232.19	IGF1R	IGF-I sR	Insulin-like growth factor 1 receptor	-0.495094	2.27957e-05	0.000864931	DOWNinCases
NELFA.24222.10	NELFA	NELFA	Negative elongation factor A	0.332994	2.30766e-05	0.000871053	UPinCases
GNPDA1.8909.77	GNPDA1	GNPI1	Glucosamine-6-phosphate isomerase 1	0.463221	2.51859e-05	0.000940919	UPinCases
LBP.3074.6	LBP	LBP	Lipopolysaccharide-binding protein	0.599676	2.60018e-05	0.000965874	UPinCases
TNFRSF10B.5534.49	TNFRSF10B	TRAIL R2	Tumor necrosis factor receptor superfamily member 10B	0.324613	2.6119e-05	0.000965874	UPinCases
TNFRSF11B.8304.50	TNFRSF11B	OPG	Tumor necrosis factor receptor superfamily member 11B	-0.774147	2.6253e-05	0.000965923	DOWNinCases
PPP1R10.22533.95	PPP1R10	PP1RA	Serine/threonine-protein phosphatase 1 regulatory subunit 10	0.592186	2.69301e-05	0.000985857	UPinCases
DCTPP1.4314.12	DCTPP1	XTP3A	dCTP pyrophosphatase 1	0.680527	2.76794e-05	0.00100822	UPinCases
CTHRC1.15467.10	CTHRC1	CTHR1	Collagen triple helix repeat-containing protein 1	-0.467981	2.88692e-05	0.00104028	DOWNinCases
B4GALT6.10832.24	B4GALT6	B4GT6	Beta-1,4-galactosyltransferase 6	-0.362182	2.93891e-05	0.00104951	DOWNinCases
STAT1.10370.21	STAT1	STAT1	Signal transducer and activator of transcription 1-alpha/beta	1.29624	3.09973e-05	0.00109619	UPinCases
TCN2.5584.21	TCN2	Holo-TC II	Holo-Transcobalamin-2	0.609614	3.22882e-05	0.00113086	UPinCases
IL15RA.3445.53	IL15RA	IL-15 Ra	Interleukin-15 receptor subunit alpha	0.369696	3.2474e-05	0.00113193	UPinCases
TREM1.9266.1	TREM1	sTREM-1	Triggering receptor expressed on myeloid cells 1	-0.421075	3.37383e-05	0.0011704	DOWNinCases
TPSB2.3403.1	TPSB2	TPSB2	Tryptase beta-2	-0.905683	3.51925e-05	0.00120365	DOWNinCases
BSG.3585.54	BSG	BASI	Basigin	0.342917	3.69475e-05	0.00125192	UPinCases
RNF146.11401.181	RNF146	RN146	E3 ubiquitin-protein ligase RNF146	-0.343154	3.86406e-05	0.00130322	DOWNinCases
KHSRP.24926.9	KHSRP	FUBP2	Far upstream element-binding protein 2	0.587264	4.14876e-05	0.00138641	UPinCases
HAVCR2.5134.52	HAVCR2	TIMD3	Hepatitis A virus cellular receptor 2	0.443759	4.19715e-05	0.00139618	UPinCases
CCL17.3519.3	CCL17	TARC	C-C motif chemokine 17	-0.347219	4.23906e-05	0.00140371	DOWNinCases
CBLN4.5688.65	CBLN4	CBLN4	Cerebellin-4	-0.494627	4.31966e-05	0.00142392	DOWNinCases
CNTN1.2974.61	CNTN1	contactin-1	Contactin-1	-0.568319	4.34312e-05	0.00142521	DOWNinCases
EPHA6.22587.37	EPHA6	EPHA6	Ephrin type-A receptor 6	-0.680816	4.4008e-05	0.0014304	DOWNinCases
AIMP1.2714.78	AIMP1	EMAP-2	Endothelial monocyte-activating polypeptide 2	-0.503499	4.43502e-05	0.0014304	DOWNinCases
INSR.3448.13	INSR	IR	Insulin receptor	-0.549576	4.43747e-05	0.0014304	DOWNinCases
TDO2.9880.33	TDO2	T23O	Tryptophan 2,3-dioxygenase	-0.680252	4.51562e-05	0.00144918	DOWNinCases
TMEM132C.7173.141	TMEM132C	T132C	Transmembrane protein 132C	-0.620113	4.82626e-05	0.00153534	DOWNinCases
FBLN7.21891.31	FBLN7	FBLN7	Fibulin-7	-0.567693	4.87254e-05	0.00154333	DOWNinCases
RAB38.23310.51	RAB38	RAB38	Ras-related protein Rab-38	-0.33957	5.01583e-05	0.00157693	DOWNinCases
COLEC12.5457.5	COLEC12	COLEC12	Collectin-12	-0.503231	5.10699e-05	0.00159676	DOWNinCases
KNG1.19631.13	KNG1	Kininostatin	Kininostatin	-1.21551	5.22768e-05	0.00162751	DOWNinCases
IL22RA1.3620.67	IL22RA1	IL22RA1	Interleukin-22 receptor subunit alpha-1	0.329576	5.31656e-05	0.00164813	UPinCases
ARFIP2.12630.8	ARFIP2	ARFP2	Arfaptin-2	-0.340889	5.36592e-05	0.00165639	DOWNinCases
IGF2R.3676.15	IGF2R	IGF-II receptor	Cation-independent mannose-6-phosphate receptor	-0.393209	5.41467e-05	0.00166438	DOWNinCases
UGT2B15.25080.16	UGT2B15	UDB15	UDP-glucuronosyltransferase 2B15	-0.517415	5.49213e-05	0.0016811	DOWNinCases
RUVBL1.12365.108	RUVBL1	RUVB1	RuvB-like 1	-0.392264	6.03239e-05	0.00181332	DOWNinCases
APOA4.17685.9	APOA4	Apo A-IV	Apolipoprotein A-IV	-0.606552	6.04855e-05	0.00181332	DOWNinCases
DSC2.13126.52	DSC2	DSC2	Desmocollin-2	-0.34795	6.50443e-05	0.00193407	DOWNinCases
VWC2.15308.108	VWC2	VWC2	Brorin	-0.508559	6.58202e-05	0.0019413	DOWNinCases
PRKCZ.2645.54	PRKCZ	PKC-Z	Protein kinase C zeta type	0.590353	6.86916e-05	0.00200971	UPinCases
C4A.C4B.18821.9	C4A	C4a	C4a anaphylatoxin	-0.743273	6.90521e-05	0.00201218	DOWNinCases
DDR2.15381.45	DDR2	Discoidin domain receptor 2	Discoidin domain-containing receptor 2	-0.407541	7.22306e-05	0.00209641	DOWNinCases
NTRK2.4866.59	NTRK2	TrkB	BDNF/NT-3 growth factors receptor	-0.625073	7.41238e-05	0.00214199	DOWNinCases
NID1.3213.65	NID1	Nidogen	Nidogen-1	0.416856	7.43888e-05	0.00214199	UPinCases
PRTN3.3514.49	PRTN3	Proteinase-3	Myeloblastin	1.00242	7.50227e-05	0.00215173	UPinCases
CALB1.9918.23	CALB1	Calbindin D28	Calbindin	-0.342841	7.75458e-05	0.00221538	DOWNinCases
UBC.6647.55	UBC	PolyUbiquitin K63	PolyUbiquitin K63-linked	0.437359	7.89091e-05	0.00223678	UPinCases
SERPINB8.19130.81	SERPINB8	SPB8	Serpin B8	0.414369	7.9846e-05	0.00225457	UPinCases
FTO.25051.104	FTO	FTO	Fat mass and obesity-associated protein	0.759343	8.05732e-05	0.00226632	UPinCases
MDGA2.19372.7	MDGA2	MDGA2	MAM domain-containing glycosylphosphatidylinositol anchor protein 2	-0.784957	8.15187e-05	0.00228409	DOWNinCases
CFP.2960.66	CFP	Properdin	Properdin	-0.431334	8.24456e-05	0.00230121	DOWNinCases
CD74.8748.45	CD74	HG2A	HLA class II histocompatibility antigen gamma chain	-0.553518	8.46518e-05	0.00235377	DOWNinCases
MMP2.4160.49	MMP2	MMP-2	72 kDa type IV collagenase	-0.567868	8.64249e-05	0.00238487	DOWNinCases
UPP1.19448.104	UPP1	UPP1	Uridine phosphorylase 1	0.529829	9.13033e-05	0.00250209	UPinCases
CR2.15570.99	CR2	Complement receptor type 2	Complement receptor type 2	-0.757848	9.13598e-05	0.00250209	DOWNinCases
WDR5.17760.128	WDR5	WDR5	WD repeat-containing protein 5	0.386208	9.2956e-05	0.00252681	UPinCases
HS6ST1.5465.32	HS6ST1	H6ST1	Heparan-sulfate 6-O-sulfotransferase 1	0.460187	9.79238e-05	0.00262971	UPinCases
DDR1.4122.12	DDR1	discoidin domain receptor 1	Epithelial discoidin domain-containing receptor 1	-0.492473	9.81101e-05	0.00262971	DOWNinCases
MFAP2.9294.45	MFAP2	MFAP2	Microfibrillar-associated protein 2	-0.446707	0.000100413	0.00266973	DOWNinCases
GLUL.19238.12	GLUL	GLNA	Glutamine synthetase	0.826077	0.000103288	0.00273093	UPinCases
IL12RB1.2632.5	IL12RB1	IL-12 Rb1	Interleukin-12 receptor subunit beta-1	0.32795	0.000103464	0.00273093	UPinCases
TMEM132A.7871.16	TMEM132A	T132A	Transmembrane protein 132A	-0.517941	0.000105895	0.002785	DOWNinCases
LGALS3BP.5000.52	LGALS3BP	LG3BP	Galectin-3-binding protein	0.694176	0.000106315	0.00278598	UPinCases
MATK.3823.9	MATK	MATK	Megakaryocyte-associated tyrosine-protein kinase	0.390604	0.000108699	0.00283824	UPinCases
SERPINA11.9002.36	SERPINA11	SPA11	Serpin A11	-0.402221	0.000112138	0.00291758	DOWNinCases
FCGR1A.3312.64	FCGR1A	FCGR1	High affinity immunoglobulin gamma Fc receptor I	0.582441	0.000114143	0.00295919	UPinCases
IFNA4.15405.23	IFNA4	IFNA4	Interferon alpha-4	0.3286	0.000118895	0.00306059	UPinCases
APOA1.2750.3	APOA1	Apo A-I	Apolipoprotein A-I	-0.388809	0.000123429	0.003144	DOWNinCases
HSPA1A.7219.152	HSPA1A	HSP 70	Heat shock 70 kDa protein 1A	0.384659	0.000125374	0.00317962	UPinCases
NPTN.7194.36	NPTN	NPTN	Neuroplastin	-0.457944	0.000126307	0.00317962	DOWNinCases
KITLG.9377.25	KITLG	SCF	Kit ligand	-0.370254	0.000126707	0.00317962	DOWNinCases
SERPINB13.18841.1	SERPINB13	SPB13	Serpin B13	-0.583806	0.00012701	0.00317962	DOWNinCases
IFNL3.5713.9	IFNL3	IFN-lambda 3	Interferon lambda-3	0.45314	0.000128103	0.003196	UPinCases
H3C1.14146.92	H3C1	H31	Histone H3.1	0.775594	0.000130174	0.00323657	UPinCases
DCLK1.17156.72	DCLK1	DCAK1	Serine/threonine-protein kinase DCLK1	-0.40599	0.000138599	0.00341113	DOWNinCases
IL1RN.5353.89	IL1RN	IL-1Ra	Interleukin-1 receptor antagonist protein	0.687201	0.000139632	0.00342497	UPinCases
KIF3A.13961.18	KIF3A	KIF3A	Kinesin-like protein KIF3A	0.40231	0.000140148	0.00342611	UPinCases
CDH17.16613.3	CDH17	CAD17	Cadherin-17	-0.741815	0.000140685	0.00342774	DOWNinCases
N6AMT1.11096.57	N6AMT1	HEMK2	HemK methyltransferase family member 2	-0.373893	0.000143825	0.00349254	DOWNinCases
RAB26.6997.32	RAB26	RAB26	Ras-related protein Rab-26	0.348487	0.000146477	0.00353339	UPinCases
ITGB7.11205.10	ITGB7	Integrin beta-7	Integrin beta-7	0.671302	0.000147489	0.00354606	UPinCases
PCSK7.4459.68	PCSK7	PCSK7	Proprotein convertase subtilisin/kexin type 7	0.404622	0.000148112	0.00354611	UPinCases
TLNRD1.21172.11	TLNRD1	MESD1	Mesoderm development candidate 1	-0.343506	0.000148828	0.00354611	DOWNinCases
PCNA.19364.163	PCNA	PCNA	Proliferating cell nuclear antigen	0.655303	0.000156024	0.0037024	UPinCases
PIGR.3216.2	PIGR	PIGR	Polymeric immunoglobulin receptor	1.08241	0.000157935	0.00373558	UPinCases
TNFRSF8.2605.49	TNFRSF8	CD30	Tumor necrosis factor receptor superfamily member 8	0.36272	0.000158698	0.00374147	UPinCases
RBM39.4284.18	RBM39	RBM39	RNA-binding protein 39	0.5211	0.000168995	0.00397138	UPinCases
DDR1.11836.144	DDR1	discoidin domain receptor 1	Epithelial discoidin domain-containing receptor 1	-0.450513	0.000171158	0.00399644	DOWNinCases
HEXB.15470.11	HEXB	Hexosaminidase B	Beta-hexosaminidase subunit beta	0.693769	0.000171841	0.00399955	UPinCases
UNC5B.15394.79	UNC5B	UNC5B	Netrin receptor UNC5B	-0.459561	0.00017349	0.00400895	DOWNinCases
GCHFR.21118.48	GCHFR	GFRP	GTP cyclohydrolase I feedback regulatory protein	0.931329	0.000173711	0.00400895	UPinCases
EPHB2.8225.86	EPHB2	EPHB2	Ephrin type-B receptor 2	0.411517	0.000173895	0.00400895	UPinCases
LEAP2.5708.1	LEAP2	LEAP2	Liver-expressed antimicrobial peptide 2	1.5872	0.00017716	0.00407133	UPinCases
C4A.C4B.4481.34	C4A	C4	Complement C4	0.32472	0.000179215	0.00409434	UPinCases
UNC5B.23038.63	UNC5B	UNC5B	Netrin receptor UNC5B	-0.430679	0.000179285	0.00409434	DOWNinCases
CNTN6.20561.15	CNTN6	CNTN6	Contactin-6	-0.673451	0.000182958	0.00415219	DOWNinCases
APOH.8288.27	APOH	b2-Glycoprotein I	Beta-2-glycoprotein 1	-0.348788	0.00018671	0.00420298	DOWNinCases
RPIA.12333.87	RPIA	RPIA	Ribose-5-phosphate isomerase	0.457009	0.000186928	0.00420298	UPinCases
EMILIN3.8773.172	EMILIN3	EMIL3	EMILIN-3	-0.350532	0.000202763	0.00453244	DOWNinCases
EFNB2.14131.37	EFNB2	EFNB2	Ephrin-B2	-0.527717	0.000202824	0.00453244	DOWNinCases
FAM118A.23358.42	FAM118A	F118A	Protein FAM118A	-0.32278	0.000204887	0.00456452	DOWNinCases
SCGB3A1.6252.62	SCGB3A1	Secretoglobin family 3A member 1	Secretoglobin family 3A member 1	-1.06643	0.000211844	0.00469083	DOWNinCases
ILF3.12759.47	ILF3	DRBP76	Interleukin enhancer-binding factor 3	0.410342	0.000213323	0.00470926	UPinCases
AMY1A.7918.114	AMY1A	Amylase, alpha 1A	Alpha-amylase 1	-0.783588	0.000216465	0.00474984	DOWNinCases
DYTN.22124.94	DYTN	DYTN	Dystrotelin	-0.501613	0.000225334	0.00490017	DOWNinCases
CDSN.7085.81	CDSN	CDSN	Corneodesmosin	-0.478071	0.000229781	0.00498201	DOWNinCases
IL22RA2.9456.34	IL22RA2	IL-22BP	Interleukin-22 receptor subunit alpha-2	-0.583172	0.000232631	0.00502401	DOWNinCases
LILRB2.5091.28	LILRB2	ILT-4	Leukocyte immunoglobulin-like receptor subfamily B member 2	0.485022	0.00023322	0.00502401	UPinCases
TNXB.5698.60	TNXB	Tenascin-X	Tenascin-X	-0.508158	0.00023429	0.00502401	DOWNinCases
TNFSF13B.3059.50	TNFSF13B	BAFF	Tumor necrosis factor ligand superfamily member 13B	0.407573	0.000234477	0.00502401	UPinCases
CNTN4.3298.52	CNTN4	Contactin-4	Contactin-4	-0.387662	0.000239887	0.00512485	DOWNinCases
CD300A.5630.48	CD300A	CM35H	CMRF35-like molecule 8	0.554859	0.000244095	0.00519952	UPinCases
PLAT.2212.69	PLAT	tPA	Tissue-type plasminogen activator	0.746866	0.000248021	0.00526773	UPinCases
ISLR2.8528.74	ISLR2	ISLR2	Immunoglobulin superfamily containing leucine-rich repeat protein 2	-0.339913	0.000248954	0.00527218	DOWNinCases
M1AP.23685.132	M1AP	M1AP	Meiosis 1 arrest protein	0.479064	0.000252893	0.0053093	UPinCases
ADAM23.7049.2	ADAM23	ADAM 23	Disintegrin and metalloproteinase domain-containing protein 23	-0.467057	0.000256896	0.00537784	DOWNinCases
VWA1.6385.63	VWA1	VWA1	von Willebrand factor A domain-containing protein 1	0.540316	0.000271058	0.0056258	UPinCases
SLITRK1.15539.15	SLITRK1	SLIK1	SLIT and NTRK-like protein 1	-0.449635	0.000274555	0.0056822	DOWNinCases
TEAD3.12854.3	TEAD3	TEAD3	Transcriptional enhancer factor TEF-5	-0.540324	0.000277359	0.00572396	DOWNinCases
RANBP3.14037.18	RANBP3	RANB3	Ran-binding protein 3	0.469557	0.000283639	0.00583225	UPinCases
SCARA5.10419.1	SCARA5	SCAR5	Scavenger receptor class A member 5	-0.587766	0.000284207	0.00583225	DOWNinCases
ANTXR2.15559.5	ANTXR2	ANTR2	Anthrax toxin receptor 2	-0.555611	0.000286917	0.00587132	DOWNinCases
CILP2.8841.65	CILP2	CILP2	Cartilage intermediate layer protein 2	-0.569021	0.00029731	0.00603315	DOWNinCases
GDF9.3067.67	GDF9	GDF-9	Growth/differentiation factor 9	0.356795	0.000308575	0.00619635	UPinCases
IL22RA2.5087.5	IL22RA2	IL-22BP	Interleukin-22 receptor subunit alpha-2	-0.489368	0.000309255	0.00619635	DOWNinCases
SULT2B1.17209.27	SULT2B1	ST2B1	Sulfotransferase family cytosolic 2B member 1	0.978738	0.000309605	0.00619635	UPinCases
MSMP.8080.24	MSMP	PSMP	Prostate-associated microseminoprotein	-0.517511	0.000313008	0.0062161	DOWNinCases
SCGN.15305.7	SCGN	Secretagogin	Secretagogin	-0.593919	0.000313151	0.0062161	DOWNinCases
DSTN.18883.4	DSTN	DEST	Destrin	-0.558349	0.000317405	0.00628342	DOWNinCases
ITGAV.ITGB3.20187.10	ITGAV	Integrin aVb3	Integrin alpha V beta 3	-0.498977	0.000332221	0.00654116	DOWNinCases
NETO2.10562.42	NETO2	NETO2	Neuropilin and tolloid-like protein 2	-0.426386	0.000378097	0.0072295	DOWNinCases
BOC.4328.2	BOC	BOC	Brother of CDO	-0.541363	0.000391025	0.00739901	DOWNinCases
PCOLCE.11237.49	PCOLCE	PCOC1	Procollagen C-endopeptidase enhancer 1	-0.343787	0.000409795	0.00766151	DOWNinCases
UNC5D.5140.56	UNC5D	UNC5H4	Netrin receptor UNC5D	-0.358876	0.000420189	0.00779008	DOWNinCases
LST1.9531.24	LST1	LST1	Leukocyte-specific transcript 1 protein	0.61949	0.000421317	0.00779008	UPinCases
SLITRK5.4568.17	SLITRK5	SLIK5	SLIT and NTRK-like protein 5	-0.544267	0.000436231	0.00804543	DOWNinCases
ENTPD1.7999.23	ENTPD1	CD39	Ectonucleoside triphosphate diphosphohydrolase 1	-0.67773	0.000440745	0.00810815	DOWNinCases
NOG.5846.24	NOG	Noggin	Noggin	-0.410069	0.000443763	0.00812264	DOWNinCases
PCK2.22405.61	PCK2	PCKGM	Phosphoenolpyruvate carboxykinase [GTP], mitochondrial	0.868064	0.000446723	0.00815634	UPinCases
PYY.3727.35	PYY	PYY	Peptide YY	-0.327324	0.000456214	0.0083088	DOWNinCases
MAFG.19281.86	MAFG	MAFG	Transcription factor MafG	0.419546	0.00045857	0.00831091	UPinCases
VWC2.11121.56	VWC2	VWC2	Brorin	-0.534396	0.000460481	0.00832407	DOWNinCases
CAPG.4968.50	CAPG	CAPG	Macrophage-capping protein	0.484059	0.000470127	0.00847741	UPinCases
MANSC1.9557.5	MANSC1	MANS1	MANSC domain-containing protein 1	0.410862	0.000473855	0.00852354	UPinCases
JPT1.19335.2	JPT1	HN1	Hematological and neurological expressed 1 protein	-0.456808	0.000480348	0.00861904	DOWNinCases
FCGR3B.3311.27	FCGR3B	FCG3B	Low affinity immunoglobulin gamma Fc region receptor III-B	0.471253	0.000484344	0.00865362	UPinCases
PCDH12.21704.8	PCDH12	PCD12	Protocadherin-12	-0.580883	0.00048465	0.00865362	DOWNinCases
CCL7.4886.3	CCL7	MCP-3	C-C motif chemokine 7	0.493902	0.000495016	0.00875358	UPinCases
CDH3.2643.57	CDH3	P-Cadherin	Cadherin-3	-0.417848	0.000495055	0.00875358	DOWNinCases
LDLRAD4.9004.24	LDLRAD4	CR001	Low-density lipoprotein receptor class A domain-containing protein 4	0.516337	0.000496618	0.00875995	UPinCases
OMG.16908.5	OMG	OMGP	Oligodendrocyte-myelin glycoprotein	-0.536216	0.000500756	0.00879039	DOWNinCases
RASA1.5481.16	RASA1	RASA1	Ras GTPase-activating protein 1	-0.387694	0.00052138	0.00906504	DOWNinCases
MUSK.11547.84	MUSK	MUSK	Muscle, skeletal receptor tyrosine-protein kinase	-0.672962	0.000526048	0.00906986	DOWNinCases
NCL.13655.34	NCL	Nucleolin	Nucleolin	0.438603	0.000528365	0.00906986	UPinCases
PPIC.18819.21	PPIC	PPIC	Peptidyl-prolyl cis-trans isomerase C	-0.468388	0.000531365	0.00906986	DOWNinCases
FGF19.2762.30	FGF19	FGF-19	Fibroblast growth factor 19	-0.794285	0.000531632	0.00906986	DOWNinCases
LUM.13114.50	LUM	Lumican	Lumican	-0.417161	0.000534107	0.00906986	DOWNinCases
CTSV.3364.76	CTSV	Cathepsin V	Cathepsin L2	-0.52242	0.000536629	0.00909053	DOWNinCases
PRSS57.8351.17	PRSS57	PRS57	Serine protease 57	0.647019	0.00053782	0.00909053	UPinCases
ICAM2.14756.29	ICAM2	sICAM-2	Intercellular adhesion molecule 2	-0.361987	0.000541852	0.00913749	DOWNinCases
XRCC6.2835.1	XRCC6	Ku70	X-ray repair cross-complementing protein 6	0.636661	0.000565112	0.00948581	UPinCases
MRTO4.21310.37	MRTO4	MRT4	mRNA turnover protein 4 homolog	0.485548	0.000569728	0.0095413	UPinCases
STC1.4930.21	STC1	Stanniocalcin-1	Stanniocalcin-1	0.728438	0.000577235	0.00962278	UPinCases
SFRP5.23296.29	SFRP5	SARP-3	SARP-3	0.957526	0.000585578	0.00971739	UPinCases
MICB.5102.55	MICB	MICB	MHC class I polypeptide-related sequence B	0.768165	0.00058938	0.00975825	UPinCases
A2M.3708.62	A2M	a2-Macroglobulin	Alpha-2-macroglobulin	-0.516715	0.000600407	0.00982913	DOWNinCases
PSMB1.12612.37	PSMB1	PSB1	Proteasome subunit beta type-1	0.407876	0.000612013	0.00995205	UPinCases
FAP.5029.3	FAP	SEPR	Prolyl endopeptidase FAP	-0.386205	0.000615895	0.00997066	DOWNinCases
ADA2.6077.63	ADA2	CECR1	Adenosine deaminase CECR1	0.598578	0.000633463	0.0101361	UPinCases
SLITRK1.10743.13	SLITRK1	SLIK1	SLIT and NTRK-like protein 1	-0.405707	0.000637371	0.0101361	DOWNinCases
IL1R1.2991.9	IL1R1	IL-1 sRI	Interleukin-1 receptor type 1	-0.542325	0.000638636	0.0101361	DOWNinCases
PSPC1.24948.79	PSPC1	PSPC1	Paraspeckle component 1	0.369398	0.000670008	0.0106109	UPinCases
KIT.2475.1	KIT	SCF sR	Mast/stem cell growth factor receptor Kit	-0.459833	0.000672056	0.0106202	DOWNinCases
COMP.8043.153	COMP	COMP	Cartilage oligomeric matrix protein	-0.525999	0.000697859	0.0109736	DOWNinCases
MGAT4B.7141.21	MGAT4B	MGT4B	Alpha-1,3-mannosyl-glycoprotein 4-beta-N-acetylglucosaminyltransferase B	-0.372731	0.000698936	0.0109736	DOWNinCases
HSPA1A.4124.24	HSPA1A	HSP 70	Heat shock 70 kDa protein 1A	0.471962	0.000729898	0.0113134	UPinCases
ASMTL.10089.7	ASMTL	ASML	N-acetylserotonin O-methyltransferase-like protein	-0.43929	0.00073578	0.0113804	DOWNinCases
FGF19.13724.27	FGF19	FGF-19	Fibroblast growth factor 19	-0.53476	0.000757528	0.0115452	DOWNinCases
CPXM1.6255.74	CPXM1	CPXM1	Probable carboxypeptidase X1	-0.608971	0.000763672	0.011599	DOWNinCases
IL18BP.3073.51	IL18BP	IL-18 BPa	Interleukin-18-binding protein	0.75028	0.000766271	0.0116056	UPinCases
TTC17.9550.153	TTC17	TTC17	Tetratricopeptide repeat protein 17	-0.475279	0.00077149	0.011647	DOWNinCases
DNASE1L2.6324.11	DNASE1L2	DNSL2	Deoxyribonuclease-1-like 2	0.473453	0.000772205	0.011647	UPinCases
ADAMTSL1.16890.37	ADAMTSL1	ATL1	ADAMTS-like protein 1	-0.464025	0.000780036	0.0117408	DOWNinCases
HSPA1A.6563.78	HSPA1A	HSP 70	Heat shock 70 kDa protein 1A	0.44503	0.000787352	0.0118265	UPinCases
NAGK.3894.15	NAGK	NAGK	N-acetyl-D-glucosamine kinase	0.56218	0.000796323	0.0119121	UPinCases
RAET1L.10589.7	RAET1L	RET1L	Retinoic acid early transcript 1L protein	-0.465091	0.000816475	0.0121886	DOWNinCases
STAU1.12471.47	STAU1	STAU1	Double-stranded RNA-binding protein Staufen homolog 1	0.369202	0.000825294	0.0122699	UPinCases
MICB.9328.55	MICB	MICB	MHC class I polypeptide-related sequence B	0.481186	0.000834326	0.0123593	UPinCases
SAA4.15516.12	SAA4	SAA-4	Serum amyloid A-4 protein	0.367757	0.000836396	0.0123593	UPinCases
HSPH1.17704.74	HSPH1	HS105	Heat shock protein 105 kDa	0.418524	0.000838958	0.0123721	UPinCases
NTN1.9013.60	NTN1	NET1	Netrin-1	0.335247	0.000848346	0.012435	UPinCases
LYVE1.3206.4	LYVE1	LYVE1	Lymphatic vessel endothelial hyaluronic acid receptor 1	-0.455798	0.000852289	0.0124665	DOWNinCases
CA6.3352.80	CA6	Carbonic anhydrase 6	Carbonic anhydrase 6	-1.29845	0.000853916	0.0124665	DOWNinCases
ALDH2.18381.16	ALDH2	ALDH-E2	Aldehyde dehydrogenase, mitochondrial	0.864711	0.000878306	0.0127969	UPinCases
HSPA1A.16780.6	HSPA1A	HSP 70	Heat shock 70 kDa protein 1A	0.445386	0.000882351	0.0128302	UPinCases
CA6.13747.9	CA6	Carbonic anhydrase 6	Carbonic anhydrase 6	-1.05088	0.000898577	0.0130209	DOWNinCases
PTPRD.9296.15	PTPRD	PTPRD	Receptor-type tyrosine-protein phosphatase delta	-0.398305	0.000909416	0.0131066	DOWNinCases
DCC.21685.29	DCC	DCC	DCC	-0.646549	0.000923075	0.0131597	DOWNinCases
MSR1.15533.97	MSR1	Macrophage scavenger receptor	Macrophage scavenger receptor types I and II	0.582345	0.000954436	0.0134489	UPinCases
LCT.9017.58	LCT	LPH	Lactase-phlorizin hydrolase	-0.442801	0.000957529	0.0134664	DOWNinCases
LAP3.15610.72	LAP3	LAP	Cytosol aminopeptidase	0.825251	0.000970189	0.013592	UPinCases
GXYLT1.8229.1	GXYLT1	GXLT1	Glucoside xylosyltransferase 1	-0.357872	0.000972206	0.0135941	DOWNinCases
VWF.3050.7	VWF	vWF	von Willebrand factor	0.480292	0.000989005	0.0137498	UPinCases
KLB.19557.3	KLB	KLOTB	Beta-klotho	0.43466	0.00100132	0.0138681	UPinCases
THBS3.8982.65	THBS3	TSP3	Thrombospondin-3	-0.677739	0.0010177	0.01397	DOWNinCases
IFNA7.14129.1	IFNA7	IFNA7	Interferon alpha-7	0.660222	0.00101964	0.01397	UPinCases
TXNL4A.21651.9	TXNL4A	TXN4A	Thioredoxin-like protein 4A	0.659312	0.00102072	0.01397	UPinCases
TREML1.11147.17	TREML1	TRML1	Trem-like transcript 1 protein	-0.464566	0.00103028	0.0140291	DOWNinCases
QPCTL.8866.53	QPCTL	QPCTL	Glutaminyl-peptide cyclotransferase-like protein	-0.349715	0.00103842	0.0141136	DOWNinCases
NNMT.19376.74	NNMT	NNMT	Nicotinamide N-methyltransferase	0.850429	0.00104402	0.0141633	UPinCases
F13A1.F13B.16927.9	F13A1	Coagulation factor XIII	Coagulation factor XIII	-0.425934	0.00105051	0.0142249	DOWNinCases
CCL8.13748.4	CCL8	MCP-2	C-C motif chemokine 8	0.717535	0.00107157	0.0144295	UPinCases
NXT1.9942.2	NXT1	NXT1	NTF2-related export protein 1	0.439723	0.00107712	0.0144775	UPinCases
HSPA6.20213.82	HSPA6	HSP76	Heat shock 70 kDa protein 6	0.466224	0.00109234	0.0146171	UPinCases
TYMP.11361.73	TYMP	TP	Thymidine phosphorylase	0.612889	0.00109352	0.0146171	UPinCases
NRXN3.16323.8	NRXN3	NRX3A	Neurexin-3	-0.326766	0.00110025	0.0146532	DOWNinCases
IL2.3070.1	IL2	IL-2	Interleukin-2	-0.634582	0.0011091	0.0147441	DOWNinCases
BCHE.8239.223	BCHE	Pseudocholinesterase	Cholinesterase	-0.45403	0.0011232	0.0148554	DOWNinCases
SUB1.19236.24	SUB1	TCP4	Activated RNA polymerase II transcriptional coactivator p15	0.795857	0.00113417	0.0149411	UPinCases
ENDOU.5656.53	ENDOU	PP11	Poly(U)-specific endoribonuclease	-0.350377	0.00114531	0.0150607	DOWNinCases
EDC4.13066.42	EDC4	EDC4	Enhancer of mRNA-decapping protein 4	0.33133	0.00116949	0.0153509	UPinCases
TIMP2.2278.61	TIMP2	TIMP-2	Metalloproteinase inhibitor 2	-0.374059	0.00118436	0.0155071	DOWNinCases
IGFBP5.2685.21	IGFBP5	IGFBP-5	Insulin-like growth factor-binding protein 5	-0.359643	0.00118687	0.0155071	DOWNinCases
GOLM1.17456.53	GOLM1	GOLM1	Golgi membrane protein 1	0.681968	0.00119101	0.0155071	UPinCases
CHL1.3601.54	CHL1	CHL1	Neural cell adhesion molecule L1-like protein	-0.333963	0.00119203	0.0155071	DOWNinCases
FMOD.6367.66	FMOD	fibromodulin	fibromodulin	-0.538345	0.00124147	0.015979	DOWNinCases
IGF2.6973.111	IGF2	IGF-II	Insulin-like growth factor II	-0.423612	0.00124581	0.0160065	DOWNinCases
MSMB.10620.21	MSMB	PSP-94	Beta-microseminoprotein	-0.650666	0.00125347	0.0160484	DOWNinCases
NDUFAF1.21107.5	NDUFAF1	CIA30	Complex I intermediate-associated protein 30, mitochondrial	-1.16703	0.00127507	0.0162678	DOWNinCases
SMOC2.15635.4	SMOC2	SMOC2	SPARC-related modular calcium-binding protein 2	-0.477711	0.00127824	0.0162797	DOWNinCases
VIT.6234.74	VIT	VITRN	Vitrin	-0.444317	0.00129167	0.0163934	DOWNinCases
PRKCSH.5687.5	PRKCSH	GLU2B	Glucosidase 2 subunit beta	-0.339025	0.00134604	0.016936	DOWNinCases
DCN.2666.53	DCN	Bone proteoglycan II	Decorin	0.350395	0.00136452	0.01708	UPinCases
IFNA1.18389.11	IFNA1	IFNA1	Interferon alpha-1/13	0.372091	0.00136932	0.0171106	UPinCases
LRP4.19558.10	LRP4	LRP4	Low-density lipoprotein receptor-related protein 4	-0.346032	0.00138042	0.0172198	DOWNinCases
GABARAPL1.12661.44	GABARAPL1	GBRL1	Gamma-aminobutyric acid receptor-associated protein-like 1	0.447666	0.00140362	0.0174478	UPinCases
SFRP4.9284.25	SFRP4	SFRP4	Secreted frizzled-related protein 4	-0.430812	0.0014125	0.0174497	DOWNinCases
PSME2.17694.32	PSME2	PSME2	Proteasome activator complex subunit 2	0.655897	0.00141285	0.0174497	UPinCases
TPSAB1.9409.11	TPSAB1	TRYB1	Tryptase beta-1	-0.673492	0.00141323	0.0174497	DOWNinCases
FURIN.6276.16	FURIN	Furin	Furin	0.328203	0.00146623	0.0179998	UPinCases
F2.4157.2	F2	Thrombin	Thrombin	-1.01436	0.00147764	0.0180918	DOWNinCases
SOD2.5008.51	SOD2	Mn SOD	Superoxide dismutase [Mn], mitochondrial	-0.354382	0.00148066	0.0180983	DOWNinCases
SRSF6.11573.3	SRSF6	SRSF6	Serine/arginine-rich splicing factor 6	0.507552	0.00149408	0.0182013	UPinCases
ASGR1.5452.71	ASGR1	ASGR1	Asialoglycoprotein receptor 1	0.567987	0.00161561	0.0192315	UPinCases
RBL2.13565.2	RBL2	p130	Retinoblastoma-like protein 2	0.476006	0.00167212	0.019775	UPinCases
ANGPTL3.10382.1	ANGPTL3	ANGL3	Angiopoietin-related protein 3	-0.333265	0.00175687	0.0206123	DOWNinCases
FTHL17.25225.14	FTHL17	FHL17	Ferritin heavy polypeptide-like 17	-0.453647	0.00175707	0.0206123	DOWNinCases
NAAA.3173.49	NAAA	ASAHL	N-acylethanolamine-hydrolyzing acid amidase	-0.713865	0.00176563	0.0206132	DOWNinCases
NUBP2.21863.11	NUBP2	NUBP2	Cytosolic Fe-S cluster assembly factor NUBP2	0.370788	0.00177418	0.0206798	UPinCases
COL10A1.15653.9	COL10A1	COAA1	Collagen alpha-1(X) chain	-0.417125	0.0017934	0.0208705	DOWNinCases
NRXN3.5111.15	NRXN3	NRX3B	Neurexin-3-beta	-0.344921	0.00179904	0.0209027	DOWNinCases
PLAUR.2652.15	PLAUR	suPAR	Urokinase plasminogen activator surface receptor	0.37392	0.00181034	0.0210006	UPinCases
ROBO2.22578.17	ROBO2	ROBO2	Roundabout homolog 2	-0.416018	0.00182664	0.0210957	DOWNinCases
F13B.5658.64	F13B	coagulation factor XIII B	Coagulation factor XIII B chain	-0.491957	0.00183293	0.0210957	DOWNinCases
ROBO1.5740.17	ROBO1	ROBO1	Roundabout homolog 1	-0.358565	0.00183303	0.0210957	DOWNinCases
B3GNT8.9297.12	B3GNT8	B3GN8	UDP-GlcNAc:betaGal beta-1,3-N-acetylglucosaminyltransferase 8	-0.377186	0.00184425	0.0211914	DOWNinCases
IMMP2L.20389.36	IMMP2L	IMP2L	Mitochondrial inner membrane protease subunit 2	0.38237	0.0018523	0.021217	UPinCases
ANXA5.14158.17	ANXA5	Annexin V	Annexin A5	-0.412582	0.00187383	0.0213629	DOWNinCases
APOL2.23566.6	APOL2	ApoL-II	Apolipoprotein-L2	0.812216	0.00188963	0.0214757	UPinCases
FGL1.5581.28	FGL1	FGL1	Fibrinogen-like protein 1	0.419984	0.00189572	0.0214779	UPinCases
ADGRL3.20578.10	ADGRL3	LPHN3	Latrophilin-3	0.368518	0.00191249	0.0216343	UPinCases
CARNMT1.23638.3	CARNMT1	CARME	Carnosine N-methyltransferase	0.34376	0.00194113	0.0219088	UPinCases
DLD.10025.1	DLD	DLDH	Dihydrolipoyl dehydrogenase, mitochondrial	0.460408	0.00197736	0.0221276	UPinCases
SARG.24950.21	SARG	SARG	Specifically androgen-regulated gene protein	-0.786082	0.00198781	0.0222105	DOWNinCases
GABARAP.22966.20	GABARAP	GBRAP	Gamma-aminobutyric acid receptor-associated protein	0.33877	0.00202459	0.0224722	UPinCases
CTSH.8465.52	CTSH	Cathepsin H	Cathepsin H	0.514735	0.002025	0.0224722	UPinCases
SPON1.5496.49	SPON1	Spondin-1	Spondin-1	-0.330026	0.00202975	0.0224722	DOWNinCases
GABARAP.17735.130	GABARAP	GBRAP	Gamma-aminobutyric acid receptor-associated protein	0.457602	0.00204334	0.0225541	UPinCases
LIFR.5837.49	LIFR	LIF sR	Leukemia inhibitory factor receptor	-0.456251	0.00209793	0.0230172	DOWNinCases
HYAL1.8309.12	HYAL1	HYAL1	Hyaluronidase-1	-0.437884	0.00211913	0.02318	DOWNinCases
FCN1.15582.25	FCN1	FCN1	Ficolin-1	-0.376296	0.00217186	0.0235508	DOWNinCases
WFDC1.9316.67	WFDC1	WFDC1	WAP four-disulfide core domain protein 1	-0.341381	0.00217397	0.0235508	DOWNinCases
SEPHS1.14083.25	SEPHS1	SPS1	Selenide, water dikinase 1	0.423046	0.00217889	0.0235508	UPinCases
CSRP2.12968.2	CSRP2	CSRP2	Cysteine and glycine-rich protein 2	-0.401521	0.00221487	0.0237804	DOWNinCases
RPN1.6458.6	RPN1	RPN1	Dolichyl-diphosphooligosaccharide--protein glycosyltransferase subunit 1	0.714972	0.00222091	0.0237804	UPinCases
ASAH2.3212.30	ASAH2	ASAH2	Neutral ceramidase	-0.419791	0.00222299	0.0237804	DOWNinCases
CEACAM7.7184.13	CEACAM7	CEAM7	Carcinoembryonic antigen-related cell adhesion molecule 7	-0.360656	0.00224215	0.0239503	DOWNinCases
VSIR.14123.34	VSIR	GI24	V-type immunoglobulin domain-containing suppressor of T-cell activation	-0.324748	0.00224903	0.0239885	DOWNinCases
ADAM22.7933.75	ADAM22	ADA22	Disintegrin and metalloproteinase domain-containing protein 22	-0.412262	0.00225632	0.0239961	DOWNinCases
NXPH1.4562.1	NXPH1	NXPH1	Neurexophilin-1	-0.426906	0.00228456	0.0242609	DOWNinCases
NTM.8428.102	NTM	NTRI	Neurotrimin	-0.376558	0.00230018	0.0243558	DOWNinCases
COL15A1.8974.172	COL15A1	COFA1	Collagen alpha-1(XV) chain	-0.371304	0.00230837	0.0243717	DOWNinCases
ARRDC5.23342.4	ARRDC5	ARRD5	Arrestin domain-containing protein 5	-0.620437	0.00236381	0.024921	DOWNinCases
PSMD6.23672.10	PSMD6	PSMD6	26S proteasome non-ATPase regulatory subunit 6	-0.349774	0.00241177	0.0252439	DOWNinCases
CRELD1.7628.40	CRELD1	CREL1	Cysteine-rich with EGF-like domain protein 1	0.531159	0.00242823	0.0253433	UPinCases
C1QTNF5.7810.20	C1QTNF5	C1QTNF5	Complement C1q tumor necrosis factor-related protein 5	-0.379486	0.00249403	0.0258082	DOWNinCases
CRIP1.18275.5	CRIP1	CRIP1	Cysteine-rich protein 1	-0.344414	0.00253472	0.0260811	DOWNinCases
KNG1.7784.1	KNG1	Kininogen, HMW	Kininogen-1	-0.335252	0.00255495	0.0262444	DOWNinCases
THBS4.3340.53	THBS4	TSP4	Thrombospondin-4	-0.640339	0.00257574	0.0262784	DOWNinCases
HPRT1.19290.5	HPRT1	HPRT	Hypoxanthine-guanine phosphoribosyltransferase	0.369803	0.00257868	0.0262784	UPinCases
ATP1B2.7218.87	ATP1B2	AT1B2	Sodium/potassium-transporting ATPase subunit beta-2	-0.414407	0.0025919	0.0263715	DOWNinCases
DEFA3.20539.4	DEFA3	HNP-3	Neutrophil defensin 3	0.808148	0.00259834	0.0264001	UPinCases
CDH13.21693.14	CDH13	CAD13	Cadherin-13	-0.372076	0.00261549	0.0265159	DOWNinCases
HSPA8.5903.91	HSPA8	HSP70 protein 8	Heat shock cognate 71 kDa protein	0.40418	0.00261989	0.0265159	UPinCases
IGF1.2952.75	IGF1	IGF-I	Insulin-like growth factor I	-0.375803	0.00262429	0.0265159	DOWNinCases
PDIA5.5593.11	PDIA5	PDIA5	Protein disulfide-isomerase A5	-0.76332	0.00265376	0.0267691	DOWNinCases
GPHN.24902.84	GPHN	GEPH	Gephyrin	0.441511	0.00266159	0.0267691	UPinCases
PDGFC.13658.31	PDGFC	PDGF-CC	Platelet-derived growth factor C	-0.435674	0.0026651	0.0267691	DOWNinCases
POMC.9204.33	POMC	Corticotropin-lipotropin	Pro-opiomelanocortin	-0.495949	0.0026799	0.0267691	DOWNinCases
GFRA1.3314.74	GFRA1	GFRa-1	GDNF family receptor alpha-1	0.601846	0.00268243	0.0267691	UPinCases
TRADD.13507.51	TRADD	TRADD	Tumor necrosis factor receptor type 1-associated DEATH domain protein	-0.333813	0.0027027	0.0268611	DOWNinCases
FOLH1.5478.50	FOLH1	PSMA	Glutamate carboxypeptidase 2	0.708324	0.00276538	0.0272368	UPinCases
SCGN.10894.25	SCGN	Secretagogin	Secretagogin	-0.952431	0.00276668	0.0272368	DOWNinCases
MUC1.10623.19	MUC1	MUC1	Mucin-1	0.426712	0.00278036	0.0272977	UPinCases
C1orf226.7989.5	C1orf226	CA226	Uncharacterized protein C1orf226	0.379976	0.00280004	0.0273803	UPinCases
TNFRSF10B.8529.1	TNFRSF10B	TRAIL R2	Tumor necrosis factor receptor superfamily member 10B	-0.454286	0.00282593	0.0275716	DOWNinCases
FCN3.5462.62	FCN3	Ficolin-3	Ficolin-3	0.558801	0.00283396	0.0276008	UPinCases
RBM23.11590.5	RBM23	RBM23	Probable RNA-binding protein 23	0.439704	0.00285077	0.0276904	UPinCases
ST3GAL2.6281.51	ST3GAL2	SIA4B	CMP-N-acetylneuraminate-beta-galactosamide-alpha-2,3-sialyltransferase 2	0.433312	0.00287658	0.0278669	UPinCases
CNTFR.2711.6	CNTFR	CNTFR alpha	Ciliary neurotrophic factor receptor subunit alpha	-0.329116	0.00293435	0.0283511	DOWNinCases
BIN2.21540.73	BIN2	BIN2	Bridging integrator 2	-0.596904	0.00295596	0.0284843	DOWNinCases
CCL22.3508.78	CCL22	MDC	C-C motif chemokine 22	-0.631415	0.00303483	0.0291288	DOWNinCases
ANGPTL1.11142.11	ANGPTL1	ANGL1	Angiopoietin-related protein 1	0.385041	0.00303883	0.0291288	UPinCases
HPGDS.12549.33	HPGDS	PTGD2	Hematopoietic prostaglandin D synthase	-0.397965	0.00305167	0.0291582	DOWNinCases
CFHR1.15468.14	CFHR1	FHR1	Complement factor H-related protein 1	-0.321993	0.0030539	0.0291582	DOWNinCases
ACP5.3232.28	ACP5	TrATPase	Tartrate-resistant acid phosphatase type 5	0.334104	0.00306589	0.0292343	UPinCases
GPC2.3315.15	GPC2	GPC2	Glypican-2	0.344784	0.0031489	0.0299188	UPinCases
STAT1.12351.25	STAT1	STAT1	Signal transducer and activator of transcription 1-alpha/beta	0.513753	0.00315215	0.0299188	UPinCases
C1QTNF4.23200.25	C1QTNF4	C1QT4	Complement C1q tumor necrosis factor-related protein 4	-0.494238	0.00315411	0.0299188	DOWNinCases
PCBD1.11313.100	PCBD1	PHS	Pterin-4-alpha-carbinolamine dehydratase	0.75917	0.0032789	0.0309014	UPinCases
ROR2.7861.9	ROR2	ROR2	Tyrosine-protein kinase transmembrane receptor ROR2	-0.325823	0.00334485	0.0313607	DOWNinCases
POFUT1.5634.39	POFUT1	OFUT1	GDP-fucose protein O-fucosyltransferase 1	-0.339276	0.00338642	0.0316283	DOWNinCases
GOLM1.8983.7	GOLM1	GOLM1	Golgi membrane protein 1	0.558998	0.00341692	0.0318315	UPinCases
L1CAM.4246.40	L1CAM	NCAM-L1	Neural cell adhesion molecule L1	-0.541824	0.00349078	0.0324781	DOWNinCases
LRIG1.18831.6	LRIG1	LRIG1	Leucine-rich repeats and immunoglobulin-like domains protein 1	0.361128	0.00361509	0.0334637	UPinCases
DLL4.3305.6	DLL4	DLL4	Delta-like protein 4	0.376911	0.00362502	0.033513	UPinCases
PPP1R3B.12768.3	PPP1R3B	PPR3B	Protein phosphatase 1 regulatory subunit 3B	-0.35548	0.00365138	0.033714	DOWNinCases
NOG.8778.3	NOG	Noggin	Noggin	-0.375663	0.00366179	0.0337673	DOWNinCases
BCHE.15514.26	BCHE	Pseudocholinesterase	Cholinesterase	-0.35269	0.00371782	0.0340255	DOWNinCases
REG4.11102.22	REG4	REG4	Regenerating islet-derived protein 4	-0.515466	0.00381982	0.0346543	DOWNinCases
RORC.11827.7	RORC	RORG	Nuclear receptor ROR-gamma	-0.376616	0.00382627	0.0346696	DOWNinCases
NT5C3B.19135.5	NT5C3B	Cytosolic 5'-nucleotidase III-like protein	7-methylguanosine phosphate-specific 5'-nucleotidase	-0.413493	0.003846	0.0347189	DOWNinCases
XPO5.25963.2	XPO5	XPO5	Exportin-5	-0.503213	0.00388265	0.034963	DOWNinCases
NEK7.12703.6	NEK7	NEK7	Serine/threonine-protein kinase Nek7	-0.683097	0.00391515	0.0351254	DOWNinCases
IAPP.19639.53	IAPP	IAPP	Islet amyloid polypeptide	-0.395234	0.00393846	0.0352911	DOWNinCases
FBP1.7206.20	FBP1	F16P1	Fructose-1,6-bisphosphatase 1	0.838577	0.00397204	0.0354611	UPinCases
UNC5B.7776.20	UNC5B	UNC5B	Netrin receptor UNC5B	-0.38591	0.00398636	0.0355158	DOWNinCases
ALAD.15523.9	ALAD	HEM2	Delta-aminolevulinic acid dehydratase	-0.542036	0.00399395	0.0355261	DOWNinCases
PLA2R1.10916.44	PLA2R1	PLA2R	Secretory phospholipase A2 receptor	-0.455994	0.00415605	0.0367437	DOWNinCases
PROC.3758.63	PROC	Activated Protein C	Activated Protein C	-0.371433	0.00427215	0.0373621	DOWNinCases
METTL2B.23558.33	METTL2B	MET2B	Methyltransferase-like protein 2B	-0.672657	0.00436655	0.03808	DOWNinCases
APLP1.7210.25	APLP1	Amyloid-like protein 1	Amyloid-like protein 1	-0.457381	0.00437515	0.03808	DOWNinCases
FCN3.14077.6	FCN3	Ficolin-3	Ficolin-3	0.392669	0.00439493	0.0381155	UPinCases
MFGE8.4455.89	MFGE8	MFGM	Lactadherin	0.5236	0.00443724	0.0383911	UPinCases
CSF1.10741.22	CSF1	CSF-1	Macrophage colony-stimulating factor 1	0.585791	0.00447515	0.0385417	UPinCases
ALDH1A2.20055.40	ALDH1A2	AL1A2	Retinal dehydrogenase 2	0.602128	0.00450825	0.0386614	UPinCases
SFRP4.17447.52	SFRP4	SFRP4	Secreted frizzled-related protein 4	-0.573039	0.00452549	0.038695	DOWNinCases
CSF1R.13682.47	CSF1R	M-CSF R	Macrophage colony-stimulating factor 1 receptor	-0.334302	0.00454557	0.0388212	DOWNinCases
SEMA6A.7945.10	SEMA6A	Semaphorin-6A	Semaphorin-6A	-0.498877	0.00471573	0.0398308	DOWNinCases
ROBO4.9232.1	ROBO4	ROBO4	Roundabout homolog 4	-0.362403	0.00474492	0.0399616	DOWNinCases
NTM.10907.116	NTM	NTRI	Neurotrimin	-0.437691	0.00477589	0.0400764	DOWNinCases
AOC1.15486.126	AOC1	ABP1	Amiloride-sensitive amine oxidase [copper-containing]	-0.48831	0.00480643	0.0402469	DOWNinCases
PLS3.25960.15	PLS3	T-plastin	Plastin-3	-0.597717	0.00483613	0.0403077	DOWNinCases
MIA.2687.2	MIA	MIA	Melanoma-derived growth regulatory protein	-0.434589	0.0049035	0.0406356	DOWNinCases
KNG1.15343.337	KNG1	Kininogen, HMW, Two Chain	Kininogen, HMW, Two Chain	-0.523651	0.00496437	0.041023	DOWNinCases
BMP7.2972.57	BMP7	BMP-7	Bone morphogenetic protein 7	-0.322225	0.00500048	0.0412087	DOWNinCases
TPST1.7928.183	TPST1	TPST1	Protein-tyrosine sulfotransferase 1	0.443628	0.00501751	0.0413023	UPinCases
UNG.22821.50	UNG	UNG	Uracil-DNA glycosylase	-0.4575	0.00506968	0.0414974	DOWNinCases
MGAT3.21771.47	MGAT3	MGAT3	Beta-1,4-mannosyl-glycoprotein 4-beta-N-acetylglucosaminyltransferase	-0.329506	0.00515475	0.0420991	DOWNinCases
OLFM4.4769.10	OLFM4	Olfactomedin-4	Olfactomedin-4	0.393457	0.00517547	0.042221	UPinCases
IL1RL1.4234.8	IL1RL1	IL-1 R4	Interleukin-1 receptor-like 1	0.7758	0.00521908	0.0424341	UPinCases
KLK7.3378.49	KLK7	Kallikrein 7	Kallikrein-7	-0.555079	0.0052432	0.0425827	DOWNinCases
CCN1.6264.9	CCN1	CYR61	Protein CYR61	0.38657	0.00526531	0.0426552	UPinCases
CBLN2.21887.2	CBLN2	CBLN2	Cerebellin-2	-0.339651	0.00527107	0.0426552	DOWNinCases
REN.3396.54	REN	Renin	Renin	-0.520974	0.00534851	0.0430718	DOWNinCases
EVA1C.7008.13	EVA1C	F176C	Protein eva-1 homolog C	-0.36874	0.00541969	0.0432922	DOWNinCases
B2M.10574.10	B2M	b2-Microglobulin	Beta-2-microglobulin	-0.49037	0.00549126	0.0437201	DOWNinCases
ENGASE.16781.2	ENGASE	ENASE	Cytosolic endo-beta-N-acetylglucosaminidase	0.455628	0.0055022	0.0437593	UPinCases
HNRNPA2B1.5351.52	HNRNPA2B1	hnRNP A2/B1	Heterogeneous nuclear ribonucleoproteins A2/B1	0.559921	0.00551226	0.0437915	UPinCases
HSPA1A.10803.22	HSPA1A	HSP 70	Heat shock 70 kDa protein 1A	0.425928	0.0055584	0.0440141	UPinCases
POSTN.6645.53	POSTN	Periostin	Periostin	-0.329665	0.00557357	0.0440408	DOWNinCases
OLR1.7893.19	OLR1	OLR1	Oxidized low-density lipoprotein receptor 1	-0.509818	0.0056298	0.0444345	DOWNinCases
NTM.20550.38	NTM	NTRI	Neurotrimin	-0.369068	0.00564534	0.0445089	DOWNinCases
CAMP.15481.45	CAMP	LL-37	Antibacterial protein LL-37	-0.389919	0.00568049	0.0447377	DOWNinCases
CPNE1.5346.24	CPNE1	CPNE1	Copine-1	-0.803196	0.00583271	0.045788	DOWNinCases
None.24423.9	None	PP13G	Protein phosphatase 1 regulatory subunit 3G	-0.336181	0.00594253	0.0464126	DOWNinCases
PSAPL1.8814.33	PSAPL1	SAPL1	Proactivator polypeptide-like 1	-0.484613	0.00594593	0.0464126	DOWNinCases
EPHB6.9261.14	EPHB6	EphB6	Ephrin type-B receptor 6	-0.376552	0.00607915	0.0470633	DOWNinCases
CCL14.2900.53	CCL14	HCC-1	C-C motif chemokine 14	-0.482755	0.00610508	0.0472139	DOWNinCases
ANXA6.5335.73	ANXA6	annexin VI	Annexin A6	-0.545935	0.00614391	0.0474136	DOWNinCases
RPS5.19195.85	RPS5	RS5	40S ribosomal protein S5	0.463947	0.00625319	0.0479016	UPinCases
MACROD2.25459.3	MACROD2	MACD2	O-acetyl-ADP-ribose deacetylase MACROD2	-0.327219	0.0063058	0.048254	DOWNinCases
GUSB.15562.24	GUSB	BGLR	Beta-glucuronidase	-0.416014	0.0063311	0.0483485	DOWNinCases
TRABD2A.9401.57	TRABD2A	CB089	Metalloprotease TIKI1	-0.421724	0.00642366	0.0488991	DOWNinCases
SIGLEC1.4464.10	SIGLEC1	Sialoadhesin	Sialoadhesin	0.328846	0.00652202	0.0495442	UPinCases
SIGLEC14.8248.222	SIGLEC14	SIG14	Sialic acid-binding Ig-like lectin 14	0.859246	0.0065628	0.0497503	UPinCases
NDUFS4.10584.7	NDUFS4	NDUS4	NADH dehydrogenase [ubiquinone] iron-sulfur protein 4, mitochondrial	-0.475087	0.00666752	0.0503346	DOWNinCases
CPM.9416.77	CPM	CBPM	Carboxypeptidase M	-0.358647	0.00675561	0.0508941	DOWNinCases
SMOC1.13118.5	SMOC1	SMOC1	SPARC-related modular calcium-binding protein 1	0.486262	0.00676959	0.0509468	UPinCases
HAMP.3504.58	HAMP	LEAP-1	Hepcidin	1.11046	0.00685498	0.0513243	UPinCases
ARL6IP5.13503.19	ARL6IP5	PRAF3	PRA1 family protein 3	-0.752031	0.00687393	0.0514133	DOWNinCases
SUMF2.6069.71	SUMF2	SUMF2	Sulfatase-modifying factor 2	0.336091	0.00691622	0.0516237	UPinCases
TTC9.24474.12	TTC9	TTC9A	Tetratricopeptide repeat protein 9A	-0.662779	0.00705686	0.0524049	DOWNinCases
DNM1.24435.1	DNM1	Dynamin	Dynamin-1	-0.706167	0.00707125	0.0524049	DOWNinCases
MATN4.7083.74	MATN4	MATN4	Matrilin-4	-0.475428	0.0071953	0.0530544	DOWNinCases
RPL12.19183.164	RPL12	RL12	60S ribosomal protein L12	0.486105	0.00723447	0.0532893	UPinCases
CPOX.18241.18	CPOX	HEM6	Oxygen-dependent coproporphyrinogen-III oxidase, mitochondrial	0.361633	0.00724457	0.0533073	UPinCases
FGFR4.4988.49	FGFR4	FGFR4	Fibroblast growth factor receptor 4	0.384787	0.00725886	0.0533073	UPinCases
RAB37.23282.19	RAB37	RAB37	Ras-related protein Rab-37	-0.390656	0.00731015	0.0535221	DOWNinCases
CRP.4337.49	CRP	CRP	C-reactive protein	0.378828	0.00743715	0.0543426	UPinCases
RCN3.16858.384	RCN3	RCN3	Reticulocalbin-3	-0.380942	0.00744476	0.0543437	DOWNinCases
ATG7.12627.97	ATG7	ATG7	Ubiquitin-like modifier-activating enzyme ATG7	-0.717983	0.00750213	0.0545439	DOWNinCases
HSPA1B.18901.26	HSPA1B	HS71B	Heat shock 70 kDa protein 1B	0.457132	0.0076006	0.0550949	UPinCases
TIMP1.23173.3	TIMP1	TIMP-1	Metalloproteinase inhibitor 1	0.352671	0.00766716	0.0552688	UPinCases
GRPEL1.7113.1	GRPEL1	GRPE1	GrpE protein homolog 1, mitochondrial	0.652119	0.00767424	0.0552688	UPinCases
RPS7.3864.5	RPS7	RS7	40S ribosomal protein S7	0.414603	0.0076777	0.0552688	UPinCases
LILRA6.7059.14	LILRA6	LIRA6	Leukocyte immunoglobulin-like receptor subfamily A member 6	0.818838	0.00771836	0.0555067	UPinCases
MMP12.4496.60	MMP12	MMP-12	Macrophage metalloelastase	-0.366291	0.00783395	0.0561716	DOWNinCases
FAM221A.24447.26	FAM221A	F221A	Protein FAM221A	-0.605852	0.00788764	0.0564454	DOWNinCases
SMC3.14324.52	SMC3	CSPG6	Structural maintenance of chromosomes protein 3	0.40224	0.00791102	0.0565308	UPinCases
TIMM8A.19148.58	TIMM8A	TIM8A	Mitochondrial import inner membrane translocase subunit Tim8 A	-0.418211	0.00791844	0.0565308	DOWNinCases
CAMP.9384.17	CAMP	Cathelicidin peptide	Cathelicidin antimicrobial peptide	-0.427863	0.00796507	0.0566656	DOWNinCases
ANKRD45.23413.38	ANKRD45	ANR45	Ankyrin repeat domain-containing protein 45	0.618787	0.00810391	0.0575409	UPinCases
FAH.11424.4	FAH	FAAA	Fumarylacetoacetase	0.507529	0.00816667	0.057875	UPinCases
DNAJA2.11582.63	DNAJA2	DNJA2	DnaJ homolog subfamily A member 2	-0.342682	0.00817784	0.0578966	DOWNinCases
DTX3L.11643.73	DTX3L	DTX3L	E3 ubiquitin-protein ligase DTX3L	0.365689	0.00820477	0.0580308	UPinCases
ALDH1A1.11265.8	ALDH1A1	Retinal dehydrogenase 1	Retinal dehydrogenase 1	0.829621	0.00838621	0.0588738	UPinCases
SEMA4G.20540.65	SEMA4G	SEM4G	Semaphorin-4G	0.336317	0.00840974	0.0589182	UPinCases
PRL.10967.12	PRL	PRL	Prolactin	-0.6219	0.00844341	0.0590876	DOWNinCases
GP5.7185.29	GP5	GPV	Platelet glycoprotein V	-0.471156	0.00848927	0.0592482	DOWNinCases
SOD1.2794.60	SOD1	SOD	Superoxide dismutase [Cu-Zn]	0.345288	0.00849271	0.0592482	UPinCases
PYGL.11441.11	PYGL	PYGL	Glycogen phosphorylase, liver form	0.543549	0.00849516	0.0592482	UPinCases
None.23424.4	None	ANR63	Ankyrin repeat domain-containing protein 63	-0.340867	0.00849889	0.0592482	DOWNinCases
EDIL3.9360.33	EDIL3	EDIL3	EGF-like repeat and discoidin I-like domain-containing protein 3	-0.361168	0.00852855	0.0593982	DOWNinCases
CPQ.9394.19	CPQ	Aminopeptidase	Carboxypeptidase Q	-0.386414	0.00864768	0.0599437	DOWNinCases
ACBD6.19341.36	ACBD6	ACBD6	Acyl-CoA-binding domain-containing protein 6	-0.331206	0.00864802	0.0599437	DOWNinCases
HSPB6.19127.1	HSPB6	HSPB6	Heat shock protein beta-6	-0.472449	0.00866127	0.0599785	DOWNinCases
AOC1.6209.2	AOC1	ABP1	Amiloride-sensitive amine oxidase [copper-containing]	-0.579588	0.00902847	0.0617581	DOWNinCases
THPO.5947.90	THPO	Tpo	Thrombopoietin	0.523643	0.0090745	0.0619566	UPinCases
PRKCA.2644.11	PRKCA	PKC-A	Protein kinase C alpha type	-0.654717	0.00920446	0.0626809	DOWNinCases
SNTA1.19274.80	SNTA1	Alpha-1-syntrophin	Alpha-1-syntrophin	-0.662576	0.00920639	0.0626809	DOWNinCases
FETUB.3367.8	FETUB	FETUB	Fetuin-B	-0.482344	0.00926271	0.0629467	DOWNinCases
FAM189A2.5699.19	FAM189A2	CI061	Protein FAM189A2	-0.400171	0.00931935	0.0630962	DOWNinCases
UBASH3B.12558.3	UBASH3B	UBS3B	Ubiquitin-associated and SH3 domain-containing protein B	-0.68768	0.00943045	0.0636708	DOWNinCases
S100A9.5339.49	S100A9	calgranulin B	Protein S100-A9	-0.429002	0.00944919	0.0637383	DOWNinCases
DTD1.19194.9	DTD1	Histidyl-tRNA synthetase-related	D-tyrosyl-tRNA(Tyr) deacylase 1	-0.616368	0.00947606	0.0638014	DOWNinCases
A2ML1.15482.12	A2ML1	A2ML1	Alpha-2-macroglobulin-like protein 1	-0.37302	0.00956967	0.0641943	DOWNinCases
B4GALT7.7806.33	B4GALT7	B4GT7	Beta-1,4-galactosyltransferase 7	-0.45599	0.00958776	0.0642565	DOWNinCases
ELANE.13671.40	ELANE	Elastase	Neutrophil elastase	0.386763	0.00985903	0.0655838	UPinCases
CTSB.8007.19	CTSB	Cathepsin B	Cathepsin B	-0.325153	0.0100371	0.0661123	DOWNinCases
CSF1R.2638.12	CSF1R	M-CSF R	Macrophage colony-stimulating factor 1 receptor	-0.34312	0.0100762	0.0663099	DOWNinCases
ARG1.5867.60	ARG1	ARGI1	Arginase-1	-0.366479	0.0101952	0.0669119	DOWNinCases
VIT.9627.15	VIT	VITRN	Vitrin	-0.353761	0.0104937	0.0682933	DOWNinCases
BTC.9242.11	BTC	BTC	Betacellulin	-0.345778	0.0104994	0.0682933	DOWNinCases
ME1.25060.18	ME1	MAOX	NADP-dependent malic enzyme	0.442351	0.0106046	0.0686791	UPinCases
CCL22.22993.9	CCL22	MDC	C-C motif chemokine 22	-0.457667	0.0106163	0.0686791	DOWNinCases
LILRB3.15615.8	LILRB3	LIRB3	Leukocyte immunoglobulin-like receptor subfamily B member 3	0.603881	0.0106233	0.0686791	UPinCases
IBSP.3415.61	IBSP	BSP	Bone sialoprotein 2	0.529975	0.0106248	0.0686791	UPinCases
CXCL12.3516.60	CXCL12	SDF-1	Stromal cell-derived factor 1	-0.333304	0.010693	0.0689107	DOWNinCases
MYOC.16558.2	MYOC	MYOC	Myocilin	-0.382901	0.0107385	0.0689592	DOWNinCases
BMP1.3348.49	BMP1	BMP-1	Bone morphogenetic protein 1	-0.430788	0.0108169	0.0693063	DOWNinCases
PRL.2585.2	PRL	PRL	Prolactin	-0.613379	0.0108351	0.0693618	DOWNinCases
FUBP1.20960.47	FUBP1	FUBP1	Far upstream element-binding protein 1	0.409099	0.0108843	0.0696156	UPinCases
CHMP2B.17350.13	CHMP2B	CHM2B	Charged multivesicular body protein 2b	-0.706439	0.0109105	0.0697219	DOWNinCases
C1R.3285.23	C1R	C1r	Complement C1r subcomponent	-0.339682	0.0109336	0.0697883	DOWNinCases
KLK14.8620.56	KLK14	kallikrein 14	Kallikrein-14	-0.389159	0.0110112	0.0701295	DOWNinCases
PENK.9076.25	PENK	PENK	Proenkephalin-A	-0.651477	0.0110345	0.0701295	DOWNinCases
PSAP.6207.10	PSAP	prosaposin	Prosaposin	-0.349095	0.0110427	0.0701295	DOWNinCases
SGSH.21766.50	SGSH	SPHM	N-sulphoglucosamine sulphohydrolase	-0.41105	0.0110972	0.0702372	DOWNinCases
CA13.3420.21	CA13	Carbonic anhydrase XIII	Carbonic anhydrase 13	-0.717852	0.0111681	0.0705636	DOWNinCases
FLT1.8231.122	FLT1	VEGF sR1	Vascular endothelial growth factor receptor 1	-0.693864	0.0111838	0.0706015	DOWNinCases
LEFTY2.15503.20	LEFTY2	Lefty-A	Left-right determination factor 2	-0.343972	0.0112492	0.0707689	DOWNinCases
ZNF174.11486.26	ZNF174	ZN174	Zinc finger protein 174	-0.412487	0.0113155	0.0710557	DOWNinCases
CALD1.25273.80	CALD1	Caldesmon	Caldesmon	-0.461398	0.0113338	0.0710557	DOWNinCases
MCL1.10396.6	MCL1	Mcl-1	Induced myeloid leukemia cell differentiation protein Mcl-1	0.323898	0.0113568	0.0710773	UPinCases
PSMA7.12460.18	PSMA7	PSA7	Proteasome subunit alpha type-7	0.428834	0.0113805	0.0711649	UPinCases
FAM3B.9177.6	FAM3B	FAM3B	Protein FAM3B	-0.463538	0.0113967	0.0712051	DOWNinCases
NDUFB6.23287.109	NDUFB6	NDUB6	NADH dehydrogenase	-0.377661	0.0114812	0.0714878	DOWNinCases
DPP7.8346.9	DPP7	DPP2	Dipeptidyl peptidase 2	-0.419224	0.01158	0.0719795	DOWNinCases
CPA4.9267.2	CPA4	CBPA4	Carboxypeptidase A4	-0.664783	0.0117897	0.073029	DOWNinCases
FLT1.16315.105	FLT1	VEGF sR1	Vascular endothelial growth factor receptor 1	-0.72763	0.0119247	0.0735798	DOWNinCases
ATG4A.21436.56	ATG4A	ATG4A	Cysteine protease ATG4A	-0.324061	0.0120319	0.0739347	DOWNinCases
THBS2.3339.33	THBS2	TSP2	Thrombospondin-2	0.581456	0.0120366	0.0739347	UPinCases
SNTB1.9078.207	SNTB1	SNTB1	Beta-1-syntrophin	-0.545981	0.0120955	0.0742338	DOWNinCases
IMPA1.17796.15	IMPA1	IMPA1	Inositol monophosphatase 1	0.534055	0.0122932	0.0753206	UPinCases
PKD2.13486.9	PKD2	PKD2	Polycystin-2	-0.463357	0.0126649	0.0768865	DOWNinCases
SPINT1.2828.82	SPINT1	HAI-1	Kunitz-type protease inhibitor 1	-0.391727	0.0127115	0.0769735	DOWNinCases
H12.2987.37	H1-2	Histone H1.2	Histone H1.2	0.67424	0.0127255	0.0769735	UPinCases
SLFNL1.23632.22	SLFNL1	SLNL1	Schlafen-like protein 1	-0.325419	0.0127662	0.0770361	DOWNinCases
PRG2.7258.5	PRG2	EMBP	Bone marrow proteoglycan	-0.619059	0.0128133	0.0770996	DOWNinCases
NR3C2.12931.16	NR3C2	MCR	Mineralocorticoid receptor	0.324289	0.0128164	0.0770996	UPinCases
CHMP1A.18224.11	CHMP1A	CHM1A	Charged multivesicular body protein 1a	-0.560308	0.0129253	0.0776266	DOWNinCases
PMM1.17408.2	PMM1	PMM1	Phosphomannomutase 1	-0.436779	0.0130682	0.0784202	DOWNinCases
C1QTNF4.25964.12	C1QTNF4	C1QT4	Complement C1q tumor necrosis factor-related protein 4	-0.389739	0.0131149	0.0785213	DOWNinCases
YBX1.9751.72	YBX1	NSEP1	Nuclease-sensitive element-binding protein 1	0.546985	0.0131324	0.0785465	UPinCases
VASP.9762.14	VASP	VASP	Vasodilator-stimulated phosphoprotein	-0.418773	0.0131673	0.0786261	DOWNinCases
NRGN.18303.39	NRGN	NEUG	Neurogranin	-0.421929	0.0132457	0.0789646	DOWNinCases
ST8SIA4.7038.45	ST8SIA4	SIA8D	CMP-N-acetylneuraminate-poly-alpha-2,8-sialyltransferase	-0.329329	0.0134379	0.0797842	DOWNinCases
IGSF3.9715.15	IGSF3	IGSF3	Immunoglobulin superfamily member 3	-0.467232	0.0136235	0.0806231	DOWNinCases
TNFRSF10A.4832.75	TNFRSF10A	TRAIL R1	Tumor necrosis factor receptor superfamily member 10A	0.407815	0.0136748	0.0807953	UPinCases
ILK.10053.5	ILK	ILK1	Integrin-linked protein kinase	-0.641678	0.0137824	0.081188	DOWNinCases
SERPINA12.6551.94	SERPINA12	Vaspin	Serpin A12	-0.825365	0.0138624	0.0815073	DOWNinCases
RNASE1.7211.2	RNASE1	RNase 1	Ribonuclease pancreatic	0.441171	0.0138745	0.0815126	UPinCases
OAT.20237.38	OAT	OAT	Ornithine aminotransferase, mitochondrial	0.390021	0.0139158	0.0816897	UPinCases
SCPEP1.23203.3	SCPEP1	RISC	Retinoid-inducible serine carboxypeptidase	0.354912	0.0139599	0.0818826	UPinCases
KLK14.15544.25	KLK14	kallikrein 14	Kallikrein-14	-0.384602	0.0140595	0.0822676	DOWNinCases
ACY3.21781.9	ACY3	ACY3	Aspartoacylase-2	0.481919	0.0142877	0.0830695	UPinCases
PRKCB.5475.10	PRKCB	PKC-B-II	Protein kinase C beta type (splice variant beta-II)	-0.496488	0.0143661	0.0833923	DOWNinCases
NDUFAF5.22509.9	NDUFAF5	NDUF5	Arginine-hydroxylase NDUFAF5, mitochondrial	0.345876	0.0144741	0.0838856	UPinCases
NTS.7857.22	NTS	NEUT	Neurotensin/neuromedin N	-0.598523	0.014835	0.0852991	DOWNinCases
FLT4.16035.8	FLT4	VEGF sR3	Vascular endothelial growth factor receptor 3	-0.353181	0.014997	0.0860773	DOWNinCases
PPP4R3A.10866.60	PPP4R3A	P4R3A	Serine/threonine-protein phosphatase 4 regulatory subunit 3A	0.401859	0.0151186	0.0863274	UPinCases
CHKB.7761.125	CHKB	CHKB	Choline/ethanolamine kinase	-0.479007	0.0151206	0.0863274	DOWNinCases
SLITRK3.10565.19	SLITRK3	SLIK3	SLIT and NTRK-like protein 3	-0.342918	0.0152919	0.0869643	DOWNinCases
LTA4H.3204.2	LTA4H	LKHA4	Leukotriene A-4 hydrolase	0.614661	0.015575	0.0883677	UPinCases
OTC.15431.31	OTC	OTCase	Ornithine carbamoyltransferase, mitochondrial	0.863376	0.0156655	0.088812	UPinCases
CHMP1B.18207.6	CHMP1B	CHM1B	Charged multivesicular body protein 1b	-0.628297	0.0159357	0.0898938	DOWNinCases
NPLOC4.12993.21	NPLOC4	NPL4	Nuclear protein localization protein 4 homolog	-0.6253	0.0162991	0.0912156	DOWNinCases
MAGOH.21008.113	MAGOH	MGN	Protein mago nashi homolog	0.343466	0.0163128	0.0912156	UPinCases
EPO.5813.58	EPO	Epo	Erythropoietin	-0.352485	0.0164099	0.0915359	DOWNinCases
GSTM3.9748.31	GSTM3	GSTM3-3	Glutathione S-transferase Mu 3	-0.359047	0.0166216	0.0922929	DOWNinCases
SNX8.6925.26	SNX8	SNX8	Sorting nexin-8	-0.605881	0.0167634	0.0928219	DOWNinCases
FCGR3A.15388.24	FCGR3A	FcRIIIa	Low affinity immunoglobulin gamma Fc region receptor III-A	-1.59335	0.0167755	0.0928219	DOWNinCases
MGP.6520.87	MGP	MGP	Matrix Gla protein	-0.365643	0.0168284	0.092888	DOWNinCases
INHBA.13738.8	INHBA	Inhibin bA chain	Inhibin beta A chain	-0.57507	0.0169271	0.09323	DOWNinCases
FAM3D.13102.1	FAM3D	FAM3D	Protein FAM3D	-0.409563	0.0170174	0.0936343	DOWNinCases
SIGLEC5.16792.4	SIGLEC5	Siglec-5	Sialic acid-binding Ig-like lectin 5	0.785705	0.0172818	0.0948575	UPinCases
ESM1.3805.16	ESM1	Endocan	Endothelial cell-specific molecule 1	0.331471	0.0173672	0.0951279	UPinCases
ANXA11.17513.11	ANXA11	ANX11	Annexin A11	-0.489489	0.0175406	0.0959332	DOWNinCases
PCBP1.11458.30	PCBP1	PCBP1	Poly(rC)-binding protein 1	-0.385452	0.0176029	0.0961158	DOWNinCases
ARPC2.23376.56	ARPC2	ARPC2	Actin-related protein 2/3 complex subunit 2	-0.575695	0.0179	0.0972809	DOWNinCases
S100A13.7223.60	S100A13	S100A13	Protein S100-A13	0.338438	0.0179072	0.0972809	UPinCases
DEFA1.9250.87	DEFA1	HNP-1	Neutrophil defensin 1	0.604976	0.0180055	0.0976979	UPinCases
OBP2B.5680.54	OBP2B	OBP2B	Odorant-binding protein 2b	-0.560401	0.0181125	0.0981736	DOWNinCases
INHBB.13676.46	INHBB	Inhibin bB chain	Inhibin beta B chain	-0.39712	0.0181254	0.0981736	DOWNinCases
HOMER2.12685.57	HOMER2	HOME2	Homer protein homolog 2	-0.573783	0.0184299	0.099186	DOWNinCases
HSPA1A.10749.18	HSPA1A	HSP 70	Heat shock 70 kDa protein 1A	0.392138	0.0185114	0.099451	UPinCases
