# Supplementary material for: Pregnancy-specific responses to COVID-19 are revealed by high-throughput proteomics of human plasma
Source: Research Square preprint supplement (doi:10.21203/rs.3.rs-1906806/v1), 2022-08-22
Supplement: Supplementary file 3 [file 6aaf46f75959c1179fbfec91.xlsx]

## Sheet: TableS2
Supplementary Table 2. Proteins differentially regulated with COVID-19 in non-pregnant patients compared to non-pregnant controls.
SomascanID	SYMBOL	Target	TargetFullName	logFC	P.Value	adj.P.Val	Direction	Concordant change with Covid19 in pregnant
H2BU1.18823.52	H2BU1	H2B3B	Histone H2B type 3-B	3.38614	1.11276e-25	8.10645e-22	UPinCases	1
H2AC1.22402.12	H2AC1	H2A1A	Histone H2A type 1-A	3.18224	3.81859e-25	1.39092e-21	UPinCases	1
H2BC21.22974.25	H2BC21	H2B2E	Histone H2B type 2-E	3.03576	1.39518e-24	3.38797e-21	UPinCases	1
H2AW.14144.3	H2AW	H2A3	Histone H2A type 3	3.29685	3.77846e-24	5.7975e-21	UPinCases	1
CELF2.7245.2	CELF2	CELF2	CUGBP Elav-like family member 2	1.86301	3.97907e-24	5.7975e-21	UPinCases	1
H2BC12.22403.13	H2BC12	H2B1K	Histone H2B type 1-K	3.30972	5.34369e-24	6.48813e-21	UPinCases	1
H2BC21.14143.8	H2BC21	H2B2E	Histone H2B type 2-E	2.69082	1.46968e-23	1.52952e-20	UPinCases	1
H2AC11.22468.54	H2AC11	Histone H2A type 1	Histone H2A type 1	2.26014	7.84049e-23	7.13975e-20	UPinCases	1
NADK.13624.17	NADK	NADK	NAD kinase	2.22702	1.44507e-22	1.1697e-19	UPinCases	1
ISG15.14148.2	ISG15	UCRP	Ubiquitin-like protein ISG15	1.91525	4.87797e-21	3.5536e-18	UPinCases	1
ISG15.14151.4	ISG15	UCRP	Ubiquitin-like protein ISG15	2.31769	8.20298e-21	5.43261e-18	UPinCases	1
MMP17.2838.53	MMP17	MMP-17	Matrix metalloproteinase-17	1.11571	2.35744e-20	1.43116e-17	UPinCases	1
CRTAC1.5632.6	CRTAC1	CRAC1	Cartilage acidic protein 1	-1.07273	2.64022e-20	1.47954e-17	DOWNinCases	1
CDON.4541.49	CDON	CDON	Cell adhesion molecule-related/down-regulated by oncogenes	-1.16194	5.6701e-20	2.95048e-17	DOWNinCases	1
SFRP5.23296.29	SFRP5	SARP-3	SARP-3	2.76804	8.18498e-20	3.97517e-17	UPinCases	1
IL22RA1.3620.67	IL22RA1	IL22RA1	Interleukin-22 receptor subunit alpha-1	0.92375	1.68534e-19	7.67356e-17	UPinCases	1
PRKCZ.2645.54	PRKCZ	PKC-Z	Protein kinase C zeta type	1.1044	2.53878e-19	1.06134e-16	UPinCases	1
CLEC7A.3603.60	CLEC7A	CLC7A	C-type lectin domain family 7 member A	0.906941	2.62239e-19	1.06134e-16	UPinCases	1
TCL1B.18276.34	TCL1B	TCL1B	T-cell leukemia/lymphoma protein 1B	0.714207	3.07212e-19	1.15247e-16	UPinCases	0
PSMA2.4280.47	PSMA2	PSA2	Proteasome subunit alpha type-2	0.877233	3.16397e-19	1.15247e-16	UPinCases	1
AP1AR.20445.29	AP1AR	AP1AR	AP-1 complex-associated regulatory protein	-1.02504	5.87951e-19	2.03963e-16	DOWNinCases	0
BSG.3585.54	BSG	BASI	Basigin	0.818102	6.89233e-19	2.2823e-16	UPinCases	1
CD4.3143.3	CD4	sCD4	T-cell surface glycoprotein CD4	0.693857	7.27148e-19	2.30316e-16	UPinCases	0
TNFSF10.8833.20	TNFSF10	TRAIL	Tumor necrosis factor ligand superfamily member 10	0.635926	1.27791e-18	3.879e-16	UPinCases	0
TGFB1.2333.72	TGFB1	TGF-b1	Transforming growth factor beta-1	0.6691	1.51443e-18	4.41305e-16	UPinCases	0
GFRA3.2505.49	GFRA3	GFRa-3	GDNF family receptor alpha-3	0.990406	1.61948e-18	4.53767e-16	UPinCases	1
NPPA.5443.62	NPPA	ANP	Atrial natriuretic factor	0.907234	2.42884e-18	6.55337e-16	UPinCases	1
ADAMDEC1.9115.78	ADAMDEC1	ADEC1	ADAM DEC1	0.853655	3.61187e-18	9.3973e-16	UPinCases	0
LST1.9531.24	LST1	LST1	Leukocyte-specific transcript 1 protein	1.30695	7.11169e-18	1.78651e-15	UPinCases	1
MX1.17460.51	MX1	Mx1	Interferon-induced GTP-binding protein Mx1	3.43816	7.40711e-18	1.79869e-15	UPinCases	1
EFNB3.2514.65	EFNB3	Ephrin-B3	Ephrin-B3	1.17349	7.94126e-18	1.8662e-15	UPinCases	1
VIM.15540.6	VIM	Vimentin	Vimentin	1.81916	8.49813e-18	1.93465e-15	UPinCases	1
SOD1.2794.60	SOD1	SOD	Superoxide dismutase [Cu-Zn]	0.942451	9.87062e-18	2.17901e-15	UPinCases	1
SIGLEC11.8913.22	SIGLEC11	SIG11	Sialic acid-binding Ig-like lectin 11	0.608334	1.73725e-17	3.72232e-15	UPinCases	0
SMOC1.13118.5	SMOC1	SMOC1	SPARC-related modular calcium-binding protein 1	1.99138	2.32093e-17	4.83084e-15	UPinCases	1
LEAP2.5708.1	LEAP2	LEAP2	Liver-expressed antimicrobial peptide 2	1.40566	2.42178e-17	4.90074e-15	UPinCases	1
TMPRSS15.3189.61	TMPRSS15	Enterokinase	Enteropeptidase	0.686606	3.68284e-17	7.25122e-15	UPinCases	1
H2AZ1.4163.5	H2AZ1	Histone H2A.z	Histone H2A.z	1.41443	4.51666e-17	8.65891e-15	UPinCases	1
ATF1.20926.31	ATF1	ATF1	Cyclic AMP-dependent transcription factor ATF-1	0.502822	6.61969e-17	1.23652e-14	UPinCases	0
RUVBL1.12365.108	RUVBL1	RUVB1	RuvB-like 1	-0.792105	8.64092e-17	1.55503e-14	DOWNinCases	1
MRPS14.22845.3	MRPS14	RT14	28S ribosomal protein S14, mitochondrial	0.632081	8.75169e-17	1.55503e-14	UPinCases	0
CCNA1.15319.226	CCNA1	CCNA1	Cyclin-A1	0.486382	9.57182e-17	1.66026e-14	UPinCases	0
ADCYAP1.4594.22	ADCYAP1	PACAP-38	Pituitary adenylate cyclase-activating polypeptide 38	0.598568	1.12655e-16	1.87767e-14	UPinCases	0
MDK.2911.27	MDK	Midkine	Midkine	2.52594	1.13408e-16	1.87767e-14	UPinCases	1
PLA2G5.2449.1	PLA2G5	GV	Calcium-dependent phospholipase A2	0.58796	1.4755e-16	2.38868e-14	UPinCases	0
C12orf65.24252.85	C12orf65	CL065	Probable peptide chain release factor C12orf65, mitochondrial	0.760084	1.60711e-16	2.54517e-14	UPinCases	1
CSF1.3738.54	CSF1	CSF-1	Macrophage colony-stimulating factor 1	0.901304	1.72945e-16	2.68064e-14	UPinCases	1
ARHGDIA.6454.38	ARHGDIA	Rho-GDIa	Rho GDP-dissociation inhibitor 1	0.536545	2.29942e-16	3.48986e-14	UPinCases	0
SPTLC2.7267.2	SPTLC2	LCB2	Serine palmitoyltransferase 2	0.632475	3.85378e-16	5.72955e-14	UPinCases	0
AHSG.3581.53	AHSG	a2-HS-Glycoprotein	Alpha-2-HS-glycoprotein	-0.737504	4.66835e-16	6.80178e-14	DOWNinCases	0
MPO.2580.83	MPO	Myeloperoxidase	Myeloperoxidase	1.13048	4.9935e-16	7.13287e-14	UPinCases	1
SULT4A1.8357.43	SULT4A1	ST4A1	Sulfotransferase 4A1	1.09988	5.13954e-16	7.20029e-14	UPinCases	0
MRC2.3041.55	MRC2	MRC2	C-type mannose receptor 2	-0.973625	5.7532e-16	7.90794e-14	DOWNinCases	1
UPP1.19448.104	UPP1	UPP1	Uridine phosphorylase 1	0.739777	6.8588e-16	9.17392e-14	UPinCases	1
ZBP1.22831.11	ZBP1	ZBP1	Z-DNA-binding protein 1	1.80371	6.92609e-16	9.17392e-14	UPinCases	1
TNFRSF8.2605.49	TNFRSF8	CD30	Tumor necrosis factor receptor superfamily member 8	0.77603	9.33273e-16	1.20549e-13	UPinCases	1
None.7143.9	None	GNT2C	N-acetyllactosaminide beta-1,6-N-acetylglucosaminyl-transferase, isoform C	0.525273	9.43209e-16	1.20549e-13	UPinCases	0
FGFBP3.11219.95	FGFBP3	FGFP3	Fibroblast growth factor-binding protein 3	0.791324	1.01387e-15	1.27346e-13	UPinCases	0
CTSG.2431.17	CTSG	Cathepsin G	Cathepsin G	0.98521	1.0362e-15	1.27944e-13	UPinCases	1
PTN.3045.72	PTN	PTN	Pleiotrophin	2.16922	1.10359e-15	1.33994e-13	UPinCases	0
HSD17B7.9929.16	HSD17B7	DHB7	3-keto-steroid reductase	-1.43628	1.28199e-15	1.53103e-13	DOWNinCases	0
RPP25L.24251.44	RPP25L	RP25L	Ribonuclease P protein subunit p25-like protein	0.441137	1.36358e-15	1.6022e-13	UPinCases	0
BMP10.3587.53	BMP10	BMP10	Bone morphogenetic protein 10	0.880047	1.5243e-15	1.76262e-13	UPinCases	1
SHC4.11692.21	SHC4	SHC4	SHC-transforming protein 4	0.589246	1.56802e-15	1.78485e-13	UPinCases	0
KNG1.19631.13	KNG1	Kininostatin	Kininostatin	-1.39865	1.6697e-15	1.87135e-13	DOWNinCases	1
MICAL1.25070.18	MICAL1	MICA1	Protein-methionine sulfoxide oxidase MICAL1	-1.74784	1.79733e-15	1.98387e-13	DOWNinCases	0
PRC1.15310.61	PRC1	PRC1	Protein regulator of cytokinesis 1	0.477395	1.93413e-15	2.10301e-13	UPinCases	0
CHMP1A.18224.11	CHMP1A	CHM1A	Charged multivesicular body protein 1a	-1.63074	2.03681e-15	2.18208e-13	DOWNinCases	1
EDA2R.3083.71	EDA2R	XEDAR	Tumor necrosis factor receptor superfamily member 27	0.721234	2.35884e-15	2.49045e-13	UPinCases	0
ULBP1.3081.70	ULBP1	ULBP-1	NKG2D ligand 1	0.577323	2.63252e-15	2.7397e-13	UPinCases	0
GALNT3.6593.5	GALNT3	GALT3	Polypeptide N-acetylgalactosaminyltransferase 3	0.482415	2.81965e-15	2.89312e-13	UPinCases	0
FCGR1A.3312.64	FCGR1A	FCGR1	High affinity immunoglobulin gamma Fc receptor I	0.817228	3.04371e-15	3.07964e-13	UPinCases	1
CLEC4G.19765.17	CLEC4G	CLC4G	C-type lectin domain family 4 member G	0.51722	3.38368e-15	3.34495e-13	UPinCases	0
RGS5.16850.5	RGS5	RGS5	Regulator of G-protein signaling 5	0.482982	3.39776e-15	3.34495e-13	UPinCases	0
COL11A2.11278.4	COL11A2	COL11A2	Collagen alpha-2(XI) chain	-1.56689	5.05278e-15	4.90794e-13	DOWNinCases	1
MMP16.5268.49	MMP16	MMP-16	Matrix metalloproteinase-16	0.494757	5.63595e-15	5.39918e-13	UPinCases	0
PRDX4.7789.182	PRDX4	PRDX4	Peroxiredoxin-4	0.538514	5.70675e-15	5.39918e-13	UPinCases	0
ASIC4.6951.26	ASIC4	ASIC4	Acid-sensing ion channel 4	0.34216	7.01583e-15	6.5526e-13	UPinCases	0
CTSF.8393.121	CTSF	CATF	Cathepsin F	0.467292	8.04653e-15	7.42013e-13	UPinCases	0
SNTB1.9078.207	SNTB1	SNTB1	Beta-1-syntrophin	-1.66406	8.32312e-15	7.57924e-13	DOWNinCases	1
JAK2.11816.84	JAK2	JAK2	Tyrosine-protein kinase JAK2	-1.68074	9.0307e-15	8.12206e-13	DOWNinCases	0
PLA2G10.2949.6	PLA2G10	GX	Group 10 secretory phospholipase A2	0.683888	9.88405e-15	8.78113e-13	UPinCases	0
PLA2G2C.8850.5	PLA2G2C	PA2GC	Putative inactive group IIC secretory phospholipase A2	0.534561	1.07578e-14	9.42547e-13	UPinCases	0
PON1.4261.55	PON1	paraoxonase 1	Serum paraoxonase/arylesterase 1	0.406256	1.08681e-14	9.42547e-13	UPinCases	0
WARS1.9870.17	WARS1	SYWC	Tryptophan--tRNA ligase, cytoplasmic	1.03524	1.1713e-14	1.00387e-12	UPinCases	1
BLNK.19225.11	BLNK	BLNK	B-cell linker protein	0.404432	1.19685e-14	1.01385e-12	UPinCases	0
KEL.7070.25	KEL	KELL	Kell blood group glycoprotein	0.580539	1.28747e-14	1.07807e-12	UPinCases	0
MAP2K4.5242.37	MAP2K4	MP2K4	Dual specificity mitogen-activated protein kinase kinase 4	-1.64144	1.35491e-14	1.12165e-12	DOWNinCases	1
ABHD12.7825.7	ABHD12	ABD12	Monoacylglycerol lipase ABHD12	0.362976	1.47734e-14	1.20926e-12	UPinCases	0
M1AP.23685.132	M1AP	M1AP	Meiosis 1 arrest protein	0.98271	1.50625e-14	1.21923e-12	UPinCases	1
EVPL.14019.73	EVPL	EVPL	Envoplakin	0.501252	1.77719e-14	1.42273e-12	UPinCases	0
HDAC6.25059.18	HDAC6	HDAC6	Histone deacetylase 6	-1.07366	2.55497e-14	2.02315e-12	DOWNinCases	0
NETO1.5639.49	NETO1	NETO1	Neuropilin and tolloid-like protein 1	0.686084	2.76551e-14	2.14884e-12	UPinCases	0
SAA1.15515.2	SAA1	SAA	Serum amyloid A-1 protein	2.71209	2.77269e-14	2.14884e-12	UPinCases	1
CCL27.2192.63	CCL27	CTACK	C-C motif chemokine 27	0.393924	3.57317e-14	2.72255e-12	UPinCases	0
CHST4.18876.77	CHST4	CHST4	Carbohydrate sulfotransferase 4	0.45769	3.58771e-14	2.72255e-12	UPinCases	0
ZNF10.11567.23	ZNF10	ZNF10	Zinc finger protein 10	0.451683	4.22062e-14	3.16981e-12	UPinCases	0
COMP.8043.153	COMP	COMP	Cartilage oligomeric matrix protein	-1.03324	4.50186e-14	3.34654e-12	DOWNinCases	1
BIN2.21540.73	BIN2	BIN2	Bridging integrator 2	-1.64808	5.0384e-14	3.70755e-12	DOWNinCases	1
CES3.25292.4	CES3	EST3	Carboxylesterase 3	-1.24878	5.1073e-14	3.72066e-12	DOWNinCases	0
FGFR3.3809.1	FGFR3	FGFR-3	Fibroblast growth factor receptor 3	0.544968	5.42057e-14	3.90979e-12	UPinCases	0
CCDC90B.7792.58	CCDC90B	CC90B	Coiled-coil domain-containing protein 90B, mitochondrial	0.479506	5.79072e-14	4.13582e-12	UPinCases	0
B4GALT3.6921.24	B4GALT3	B4GT3	Beta-1,4-galactosyltransferase 3	0.433129	6.08184e-14	4.30157e-12	UPinCases	0
LTA.4703.87	LTA	TNF-b	Lymphotoxin-alpha	0.447375	7.15878e-14	5.01458e-12	UPinCases	0
ABCF3.23700.42	ABCF3	ABCF3	ATP-binding cassette sub-family F member 3	-1.46391	7.29722e-14	5.06288e-12	DOWNinCases	0
FERMT3.12599.10	FERMT3	URP2	Fermitin family homolog 3	-1.48191	7.86571e-14	5.40582e-12	DOWNinCases	0
PLG.4150.75	PLG	Plasmin	Plasmin	0.464096	8.19424e-14	5.57897e-12	UPinCases	0
WFIKKN1.3191.50	WFIKKN1	WFKN1	WAP, kazal, immunoglobulin, kunitz and NTR domain-containing protein 1	0.565028	8.82108e-14	5.95014e-12	UPinCases	0
FGF22.9513.9	FGF22	FGF22	Fibroblast growth factor 22	0.547509	9.74187e-14	6.51096e-12	UPinCases	0
SPINT1.2828.82	SPINT1	HAI-1	Kunitz-type protease inhibitor 1	-0.822196	1.01711e-13	6.73606e-12	DOWNinCases	1
EDN1.6495.14	EDN1	Endothelin 1	Endothelin-1	0.371014	1.07111e-13	7.02977e-12	UPinCases	0
ROCK2.13654.1	ROCK2	ROCK2	Rho-associated protein kinase 2	-1.86868	1.14625e-13	7.45577e-12	DOWNinCases	0
SNTA1.19274.80	SNTA1	Alpha-1-syntrophin	Alpha-1-syntrophin	-1.9203	1.1883e-13	7.66087e-12	DOWNinCases	1
SVBP.20379.59	SVBP	SVBP	Small vasohibin-binding protein	0.52498	1.20295e-13	7.68725e-12	UPinCases	0
ITGA2B.ITGB3.3739.72	ITGA2B	gpIIbIIIa	Integrin alpha-IIb: beta-3 complex	-1.55106	1.21573e-13	7.70136e-12	DOWNinCases	0
ENO2.11083.23	ENO2	NSE	Gamma-enolase	-0.931391	1.33676e-13	8.39507e-12	DOWNinCases	0
PRKACA.3466.8	PRKACA	PRKACA	cAMP-dependent protein kinase catalytic subunit alpha	-1.53683	1.36672e-13	8.47667e-12	DOWNinCases	0
THBS4.3340.53	THBS4	TSP4	Thrombospondin-4	-1.32112	1.37302e-13	8.47667e-12	DOWNinCases	1
DAPP1.11615.16	DAPP1	DAPP1	Dual adapter for phosphotyrosine and 3-phosphotyrosine and 3-phosphoinositide	-1.77631	1.41686e-13	8.67383e-12	DOWNinCases	0
IL12RB1.2632.5	IL12RB1	IL-12 Rb1	Interleukin-12 receptor subunit beta-1	0.647792	1.45371e-13	8.82522e-12	UPinCases	1
PGLYRP2.5601.2	PGLYRP2	PGRP-L	N-acetylmuramoyl-L-alanine amidase	-0.871378	1.63953e-13	9.86871e-12	DOWNinCases	1
ILK.10053.5	ILK	ILK1	Integrin-linked protein kinase	-2.00954	1.65269e-13	9.86871e-12	DOWNinCases	1
RAB7A.23915.18	RAB7A	Rab-7	Ras-related protein Rab-7	-1.2935	1.71487e-13	1.01568e-11	DOWNinCases	0
KLHL3.25039.10	KLHL3	KLHL3	Kelch-like protein 3	0.45764	1.80236e-13	1.05889e-11	UPinCases	0
ITGAV.ITGB3.20187.10	ITGAV	Integrin aVb3	Integrin alpha V beta 3	-1.11628	1.85431e-13	1.08069e-11	DOWNinCases	1
MDH2.12649.80	MDH2	Malate dehydrogenase 2	Malate dehydrogenase, mitochondrial	-1.10929	1.87962e-13	1.08675e-11	DOWNinCases	0
EWSR1.12988.49	EWSR1	EWS	RNA-binding protein EWS	1.21465	1.90309e-13	1.09165e-11	UPinCases	1
SFRP1.14042.11	SFRP1	SARP-2	Secreted frizzled-related protein 1	2.32609	2.06802e-13	1.17667e-11	UPinCases	0
PRTFDC1.20950.159	PRTFDC1	PRDC1	Phosphoribosyltransferase domain-containing protein 1	-1.97671	2.08361e-13	1.17667e-11	DOWNinCases	0
PPIF.5248.68	PPIF	Cyclophilin F	Peptidyl-prolyl cis-trans isomerase F, mitochondrial	-1.577	2.26531e-13	1.26944e-11	DOWNinCases	0
ICAM3.2649.77	ICAM3	sICAM-3	Intercellular adhesion molecule 3	0.649407	2.33392e-13	1.29791e-11	UPinCases	0
CSK.3363.31	CSK	CSK	Tyrosine-protein kinase CSK	-1.3107	2.39008e-13	1.31907e-11	DOWNinCases	0
PDE5A.16805.5	PDE5A	PDE5A	cGMP-specific 3',5'-cyclic phosphodiesterase	-1.48628	2.48109e-13	1.359e-11	DOWNinCases	0
SMOC1.5694.57	SMOC1	SMOC1	SPARC-related modular calcium-binding protein 1	1.28709	2.58667e-13	1.40626e-11	UPinCases	0
SFRP1.3221.54	SFRP1	SARP-2	Secreted frizzled-related protein 1	2.70354	2.67809e-13	1.44518e-11	UPinCases	0
DBNL.9755.19	DBNL	DBNL	Drebrin-like protein	-1.21128	2.85946e-13	1.52934e-11	DOWNinCases	0
LRRFIP2.25479.8	LRRFIP2	LRRF2	Leucine-rich repeat flightless-interacting protein 2	-1.48988	2.87605e-13	1.52934e-11	DOWNinCases	0
PLXNA4.19560.23	PLXNA4	PLXA4	Plexin-A4	-1.18054	3.22056e-13	1.69558e-11	DOWNinCases	0
GPNMB.5080.131	GPNMB	GPNMB	Transmembrane glycoprotein NMB	-0.911199	3.23522e-13	1.69558e-11	DOWNinCases	0
LRRC15.6557.50	LRRC15	LRC15	Leucine-rich repeat-containing protein 15	-1.33327	3.31575e-13	1.72203e-11	DOWNinCases	1
LUM.13114.50	LUM	Lumican	Lumican	-0.778222	3.33296e-13	1.72203e-11	DOWNinCases	1
ZNF264.9993.11	ZNF264	ZN264	Zinc finger protein 264	0.565906	3.40323e-13	1.73977e-11	UPinCases	0
ANXA11.17513.11	ANXA11	ANX11	Annexin A11	-1.36493	3.41507e-13	1.73977e-11	DOWNinCases	1
NTRK2.4866.59	NTRK2	TrkB	BDNF/NT-3 growth factors receptor	-1.03642	3.45075e-13	1.74575e-11	DOWNinCases	1
VASP.9762.14	VASP	VASP	Vasodilator-stimulated phosphoprotein	-1.25203	3.70018e-13	1.85902e-11	DOWNinCases	1
CRIM1.8699.43	CRIM1	CRIM1	Cysteine-rich motor neuron 1 protein	0.710119	3.79774e-13	1.89497e-11	UPinCases	0
PCBP1.11458.30	PCBP1	PCBP1	Poly(rC)-binding protein 1	-1.00463	3.8788e-13	1.92225e-11	DOWNinCases	1
TGFB3.3520.58	TGFB3	TGF-b3	Transforming growth factor beta-3	0.568255	3.93393e-13	1.9364e-11	UPinCases	0
PRKCA.2644.11	PRKCA	PKC-A	Protein kinase C alpha type	-1.88306	4.01326e-13	1.96219e-11	DOWNinCases	1
BAP18.21153.5	BAP18	BAP18	Chromatin complexes subunit BAP18	-1.80153	4.45438e-13	2.16334e-11	DOWNinCases	0
FER.4220.39	FER	FER	Tyrosine-protein kinase Fer	-2.09205	4.57578e-13	2.20759e-11	DOWNinCases	0
VSIG4.17678.28	VSIG4	VSIG4	V-set and immunoglobulin domain-containing protein 4	1.53848	5.13136e-13	2.4456e-11	UPinCases	1
IGSF9B.9060.27	IGSF9B	TUTLB	Protein turtle homolog B	0.349508	5.13625e-13	2.4456e-11	UPinCases	0
RAB11A.17744.31	RAB11A	RB11A	Ras-related protein Rab-11A	-1.37382	5.2931e-13	2.49216e-11	DOWNinCases	0
AK2.11368.32	AK2	KAD2	Adenylate kinase 2, mitochondrial	-1.13632	5.30247e-13	2.49216e-11	DOWNinCases	0
FHOD1.25115.21	FHOD1	FHOD1	FH1/FH2 domain-containing protein 1	-1.56082	5.73627e-13	2.66981e-11	DOWNinCases	0
DCC.21685.29	DCC	DCC	DCC	-1.25139	5.78939e-13	2.66981e-11	DOWNinCases	1
LCP1.9749.190	LCP1	L-plastin	Plastin-2	0.686377	5.79039e-13	2.66981e-11	UPinCases	1
SNX5.18327.6	SNX5	SNX5	Sorting nexin-5	-1.33055	6.03377e-13	2.76453e-11	DOWNinCases	0
CALD1.25273.80	CALD1	Caldesmon	Caldesmon	-1.27888	6.11307e-13	2.78336e-11	DOWNinCases	1
WARS2.22792.21	WARS2	SYWM	Tryptophan--tRNA ligase, mitochondrial	0.486709	6.51499e-13	2.92974e-11	UPinCases	0
DTD1.19194.9	DTD1	Histidyl-tRNA synthetase-related	D-tyrosyl-tRNA(Tyr) deacylase 1	-1.6815	7.05957e-13	3.15515e-11	DOWNinCases	1
HPGDS.12549.33	HPGDS	PTGD2	Hematopoietic prostaglandin D synthase	-0.938445	7.18818e-13	3.19304e-11	DOWNinCases	1
ZFAND1.19173.5	ZFAND1	ZFAN1	AN1-type zinc finger protein 1	-1.51409	7.77527e-13	3.4329e-11	DOWNinCases	0
RBM18.20383.31	RBM18	RBM18	Probable RNA-binding protein 18	0.407826	7.93009e-13	3.46433e-11	UPinCases	0
ID2.15403.53	ID2	ID2	DNA-binding protein inhibitor ID-2	0.55558	7.94157e-13	3.46433e-11	UPinCases	0
ADAM23.7049.2	ADAM23	ADAM 23	Disintegrin and metalloproteinase domain-containing protein 23	-0.843305	8.01204e-13	3.47221e-11	DOWNinCases	1
MFRP.3685.53	MFRP	MFRP	Membrane frizzled-related protein	0.653652	8.05495e-13	3.47221e-11	UPinCases	0
PDLIM1.11428.31	PDLIM1	PDLI1	PDZ and LIM domain protein 1	-1.77871	8.32916e-13	3.56929e-11	DOWNinCases	0
DUSP28.9940.35	DUSP28	DUS28	Dual specificity phosphatase 28	-1.73755	8.59399e-13	3.66124e-11	DOWNinCases	0
OLFM4.4769.10	OLFM4	Olfactomedin-4	Olfactomedin-4	0.561085	9.30702e-13	3.94195e-11	UPinCases	1
ITGA2B.ITGB3.19574.5	ITGA2B	gpIIbIIIa	Integrin alpha-IIb: beta-3 complex	-1.87307	9.69856e-13	4.07874e-11	DOWNinCases	0
ANAPC7.11690.47	ANAPC7	APC7	Anaphase-promoting complex subunit 7	0.373797	9.74195e-13	4.07874e-11	UPinCases	0
DNM1.24435.1	DNM1	Dynamin	Dynamin-1	-2.07524	9.86314e-13	4.10588e-11	DOWNinCases	1
ANAPC10.12345.4	ANAPC10	APC10	Anaphase-promoting complex subunit 10	0.382306	1.00223e-12	4.14845e-11	UPinCases	0
GPNMB.8289.8	GPNMB	GPNMB	Transmembrane glycoprotein NMB	-0.779773	1.02859e-12	4.22306e-11	DOWNinCases	0
RSPO2.4566.24	RSPO2	RSPO2	R-spondin-2	0.440991	1.03185e-12	4.22306e-11	UPinCases	0
CSRP2.12968.2	CSRP2	CSRP2	Cysteine and glycine-rich protein 2	-1.08005	1.04905e-12	4.26944e-11	DOWNinCases	1
KIT.2475.1	KIT	SCF sR	Mast/stem cell growth factor receptor Kit	-0.76701	1.06565e-12	4.31291e-11	DOWNinCases	1
PYGB.24414.3	PYGB	Glycogen phosphorylase	Glycogen phosphorylase, brain form	-1.34623	1.10073e-12	4.43031e-11	DOWNinCases	0
MDGA2.19372.7	MDGA2	MDGA2	MAM domain-containing glycosylphosphatidylinositol anchor protein 2	-1.06005	1.12051e-12	4.48513e-11	DOWNinCases	1
CTDSP1.21166.1	CTDSP1	CTDS1	Carboxy-terminal domain RNA polymerase II polypeptide A small phosphatase 1	-1.72272	1.13439e-12	4.51587e-11	DOWNinCases	0
LTA.LTB.3505.6	LTA	Lymphotoxin a1/b2	Lymphotoxin alpha1:beta2	-0.721037	1.15049e-12	4.55508e-11	DOWNinCases	0
INPP5B.12641.3	INPP5B	I5P2	Type II inositol 1,4,5-trisphosphate 5-phosphatase	-2.28626	1.24174e-12	4.88976e-11	DOWNinCases	0
ZWINT.18286.3	ZWINT	ZWINT	ZW10 interactor	-0.533882	1.27746e-12	5.00338e-11	DOWNinCases	0
PTK2B.11395.5	PTK2B	FAK2	Protein-tyrosine kinase 2-beta	-1.29676	1.29015e-12	5.01983e-11	DOWNinCases	0
TAGLN2.11636.33	TAGLN2	Transgelin-2	Transgelin-2	-1.26666	1.29608e-12	5.01983e-11	DOWNinCases	0
UBASH3B.12558.3	UBASH3B	UBS3B	Ubiquitin-associated and SH3 domain-containing protein B	-1.98907	1.30233e-12	5.01983e-11	DOWNinCases	1
STK24.12617.2	STK24	STK24	Serine/threonine-protein kinase 24	-1.3978	1.31362e-12	5.03328e-11	DOWNinCases	0
DSTN.18883.4	DSTN	DEST	Destrin	-1.04745	1.31964e-12	5.03328e-11	DOWNinCases	1
IP6K2.22479.64	IP6K2	IP6K2	Inositol hexakisphosphate kinase 2	-1.07952	1.36052e-12	5.16217e-11	DOWNinCases	0
TNXB.5698.60	TNXB	Tenascin-X	Tenascin-X	-0.721979	1.53082e-12	5.77825e-11	DOWNinCases	1
FAM3A.21555.17	FAM3A	FAM3A	Protein FAM3A	-0.986495	1.54431e-12	5.79912e-11	DOWNinCases	0
INPP5A.25444.29	INPP5A	I5P1	Type I inositol 1,4,5-trisphosphate 5-phosphatase	-1.89659	1.59085e-12	5.92479e-11	DOWNinCases	0
PRKAR2B.25463.3	PRKAR2B	KAP3	cAMP-dependent protein kinase type II-beta regulatory subunit	-1.44591	1.59404e-12	5.92479e-11	DOWNinCases	0
RAB1A.19223.6	RAB1A	RAB1A	Ras-related protein Rab-1A	-1.27846	1.63993e-12	6.0644e-11	DOWNinCases	0
ARPC1B.12689.56	ARPC1B	ARC1B	Actin-related protein 2/3 complex subunit 1B	-1.56835	1.75049e-12	6.44058e-11	DOWNinCases	0
CEP43.21793.4	CEP43	FR1OP	FGFR1 oncogene partner	0.428815	1.76263e-12	6.45266e-11	UPinCases	0
UBA7.21933.7	UBA7	UBA7	Ubiquitin-like modifier-activating enzyme 7	-1.76143	1.79993e-12	6.55624e-11	DOWNinCases	0
PAX8.18314.88	PAX8	PAX-8	Paired box protein Pax-8	0.424101	1.82358e-12	6.60935e-11	UPinCases	0
VRK1.12553.5	VRK1	VRK1	Serine/threonine-protein kinase VRK1	0.373191	1.833e-12	6.6106e-11	UPinCases	0
RHOC.17764.108	RHOC	RHOC	Rho-related GTP-binding protein RhoC	-1.77738	1.86911e-12	6.7076e-11	DOWNinCases	0
CSRP1.15529.33	CSRP1	Cysteine-rich protein 1	Cysteine and glycine-rich protein 1	-1.72121	1.87996e-12	6.71347e-11	DOWNinCases	0
RAB21.17514.48	RAB21	RAB21	Ras-related protein Rab-21	-1.36462	1.89294e-12	6.72686e-11	DOWNinCases	0
NUCB1.10451.11	NUCB1	NUCB1	Nucleobindin-1	1.04165	1.92243e-12	6.78048e-11	UPinCases	1
IVD.17737.7	IVD	IVD	Isovaleryl-CoA dehydrogenase, mitochondrial	-1.98118	1.92664e-12	6.78048e-11	DOWNinCases	0
IFNL2.4397.26	IFNL2	IFN-lambda 2	Interferon lambda-2	0.623009	2.02409e-12	7.08919e-11	UPinCases	0
LYN.3381.24	LYN	LYNB	Tyrosine-protein kinase Lyn, isoform B	-1.63148	2.07867e-12	7.24551e-11	DOWNinCases	0
PDIA4.7146.16	PDIA4	PDIA4	Protein disulfide-isomerase A4	0.376836	2.29501e-12	7.95087e-11	UPinCases	0
CHMP2B.17350.13	CHMP2B	CHM2B	Charged multivesicular body protein 2b	-1.6693	2.30286e-12	7.95087e-11	DOWNinCases	1
BTK.19202.10	BTK	BTK	Tyrosine-protein kinase BTK	-1.54888	2.31721e-12	7.96268e-11	DOWNinCases	0
ADAM22.7933.75	ADAM22	ADA22	Disintegrin and metalloproteinase domain-containing protein 22	-0.872745	2.39677e-12	8.18257e-11	DOWNinCases	1
METAP1D.19752.197	METAP1D	AMP1D	Methionine aminopeptidase 1D, mitochondrial	0.406522	2.40367e-12	8.18257e-11	UPinCases	0
STAT6.10372.18	STAT6	STAT6	Signal transducer and activator of transcription 6	-1.16603	2.46798e-12	8.36243e-11	DOWNinCases	0
GPNMB.8240.207	GPNMB	GPNMB	Transmembrane glycoprotein NMB	-0.794109	2.54813e-12	8.59402e-11	DOWNinCases	0
FKBP3.18383.9	FKBP3	FKBP3	Peptidyl-prolyl cis-trans isomerase FKBP3	-1.0253	2.56598e-12	8.61436e-11	DOWNinCases	0
SERPINB3.21832.31	SERPINB3	SCCA1	Squamous cell carcinoma antigen 1	0.593683	2.58324e-12	8.62304e-11	UPinCases	0
MYL9.21817.5	MYL9	MYL9	Myosin, light chain 9, regulatory	-1.52266	2.59224e-12	8.62304e-11	DOWNinCases	0
ADAM12.4420.7	ADAM12	ADAM12	Disintegrin and metalloproteinase domain-containing protein 12	0.45708	2.66245e-12	8.81633e-11	UPinCases	0
NAP1L1.13636.20	NAP1L1	NP1L1	Nucleosome assembly protein 1-like 1	-1.22819	2.69515e-12	8.84423e-11	DOWNinCases	0
LGALSL.18236.3	LGALSL	LEGL	Galectin-related protein	-1.68084	2.95162e-12	9.6424e-11	DOWNinCases	0
NRGN.18303.39	NRGN	NEUG	Neurogranin	-0.956436	2.98482e-12	9.70732e-11	DOWNinCases	1
CHST14.7262.191	CHST14	CHSTE	Carbohydrate sulfotransferase 14	0.370887	3.02633e-12	9.7986e-11	UPinCases	0
CS.18309.18	CS	CISY	Citrate synthase, mitochondrial	-1.36689	3.28055e-12	1.05281e-10	DOWNinCases	0
AHCY.21393.62	AHCY	SAHH	Adenosylhomocysteinase	0.52642	3.4438e-12	1.08897e-10	UPinCases	0
AKT3.3392.68	AKT3	PKB gamma	Protein kinase B gamma	-1.24365	3.44599e-12	1.08897e-10	DOWNinCases	0
LSMEM1.24289.1	LSMEM1	CG053	Coiled-coil domain-containing transmembrane protein C7orf53	0.411929	3.4742e-12	1.08897e-10	UPinCases	0
XCL1.4143.74	XCL1	Lymphotactin	Lymphotactin	0.45654	3.47432e-12	1.08897e-10	UPinCases	0
PRKCB.5475.10	PRKCB	PKC-B-II	Protein kinase C beta type (splice variant beta-II)	-1.47278	3.48292e-12	1.08897e-10	DOWNinCases	1
CNTN4.3298.52	CNTN4	Contactin-4	Contactin-4	-0.627351	3.50757e-12	1.09199e-10	DOWNinCases	1
INPP5F.24971.2	INPP5F	SAC2	Phosphatidylinositide phosphatase SAC2	-0.696344	3.68186e-12	1.14138e-10	DOWNinCases	0
COPB2.24459.15	COPB2	COPB2	Coatomer subunit beta'	-1.49362	3.83227e-12	1.18297e-10	DOWNinCases	0
IL15RA.3445.53	IL15RA	IL-15 Ra	Interleukin-15 receptor subunit alpha	0.663496	3.89833e-12	1.19829e-10	UPinCases	1
LAYN.2635.61	LAYN	Layilin	Layilin	0.519097	3.99114e-12	1.22166e-10	UPinCases	0
FGF3.7894.155	FGF3	FGF-3	Fibroblast growth factor 3	0.425106	4.04696e-12	1.23356e-10	UPinCases	0
CAPZA1.11449.22	CAPZA1	CAZA1	F-actin-capping protein subunit alpha-1	-1.22065	4.23003e-12	1.28399e-10	DOWNinCases	0
ZDHHC4.22834.21	ZDHHC4	ZDHC4	Probable palmitoyltransferase ZDHHC4	-0.657118	4.36639e-12	1.31988e-10	DOWNinCases	0
MYCBP.19250.50	MYCBP	MYCBP	C-Myc-binding protein	-1.60007	4.45101e-12	1.3399e-10	DOWNinCases	0
MMP12.4496.60	MMP12	MMP-12	Macrophage metalloelastase	-1.37506	4.4833e-12	1.34407e-10	DOWNinCases	1
MAPRE3.16885.49	MAPRE3	MARE3	Microtubule-associated protein RP/EB family member 3	-0.994683	4.63166e-12	1.37758e-10	DOWNinCases	0
JAG1.7754.11	JAG1	JAG1	Protein jagged-1	0.512987	4.97019e-12	1.46996e-10	UPinCases	0
ANTXR1.10464.6	ANTXR1	ANTR1	Anthrax toxin receptor 1	-0.606831	4.98393e-12	1.46996e-10	DOWNinCases	1
HRG.4996.66	HRG	HRG	Histidine-rich glycoprotein	-1.09655	5.09892e-12	1.49781e-10	DOWNinCases	1
PIM1.5359.65	PIM1	PIM1	Serine/threonine-protein kinase pim-1	0.438053	5.27437e-12	1.54312e-10	UPinCases	0
NME2.4249.64	NME2	NDP kinase B	Nucleoside diphosphate kinase B	-1.34484	5.30804e-12	1.54676e-10	DOWNinCases	0
HAGHL.23546.9	HAGHL	HAGHL	Hydroxyacylglutathione hydrolase-like protein	0.494893	5.49238e-12	1.5941e-10	UPinCases	0
HGS.13644.30	HGS	HGS	Hepatocyte growth factor-regulated tyrosine kinase substrate	-1.404	5.80631e-12	1.67853e-10	DOWNinCases	0
CDK2.CCNA2.3357.67	CDK2	CDK2/cyclin A	Cyclin-dependent kinase 2:Cyclin-A2 complex	0.586845	5.86318e-12	1.68827e-10	UPinCases	1
NT5C.12560.9	NT5C	NT5C	5'(3')-deoxyribonucleotidase, cytosolic type	-0.978335	6.57377e-12	1.88543e-10	DOWNinCases	0
RILPL1.24496.26	RILPL1	RIPL1	RILP-like protein 1	-1.06039	6.61925e-12	1.88832e-10	DOWNinCases	0
CLSTN3.6291.55	CLSTN3	Alcadein-beta	Calsyntenin-3	1.33076	6.63568e-12	1.88832e-10	UPinCases	1
SEMA3B.5667.3	SEMA3B	SEM3B	Semaphorin-3B	0.414696	6.97264e-12	1.97649e-10	UPinCases	0
ICAM2.14756.29	ICAM2	sICAM-2	Intercellular adhesion molecule 2	-0.795149	7.10687e-12	2.00342e-10	DOWNinCases	1
OAS1.10361.25	OAS1	OAS1	2'-5'-oligoadenylate synthase 1	0.331741	7.12266e-12	2.00342e-10	UPinCases	0
ARL6IP5.13503.19	ARL6IP5	PRAF3	PRA1 family protein 3	-2.03465	7.2213e-12	2.02335e-10	DOWNinCases	1
AP1S2.18405.117	AP1S2	AP1S2	AP-1 complex subunit sigma-2	-0.648895	7.27076e-12	2.02941e-10	DOWNinCases	0
GABBR1.11279.42	GABBR1	GABR1	Gamma-aminobutyric acid type B receptor subunit 1	0.408132	7.60316e-12	2.10837e-10	UPinCases	0
HDGFL2.4553.65	HDGFL2	HDGR2	Hepatoma-derived growth factor-related protein 2	0.38915	7.61154e-12	2.10837e-10	UPinCases	0
IFNL1.13734.22	IFNL1	IFN-lambda 1	Interferon lambda-1	0.839724	7.75362e-12	2.13959e-10	UPinCases	1
NPLOC4.12993.21	NPLOC4	NPL4	Nuclear protein localization protein 4 homolog	-1.6593	7.82286e-12	2.15055e-10	DOWNinCases	1
LTB4R.13477.65	LTB4R	LT4R1	Leukotriene B4 receptor 1	-1.42987	7.90109e-12	2.16389e-10	DOWNinCases	0
PLEKHF2.20994.37	PLEKHF2	PKHF2	Pleckstrin homology domain-containing family F member 2	-1.67581	8.16824e-12	2.22683e-10	DOWNinCases	0
GZMH.3373.5	GZMH	Granzyme H	Granzyme H	0.489997	8.19205e-12	2.22683e-10	UPinCases	0
RRAS.17742.2	RRAS	RRAS	Ras-related protein R-Ras	-0.574468	8.56014e-12	2.31824e-10	DOWNinCases	0
NEK7.12703.6	NEK7	NEK7	Serine/threonine-protein kinase Nek7	-1.72956	8.6002e-12	2.32046e-10	DOWNinCases	1
DAB2.21963.48	DAB2	DAB2	Disabled homolog 2	-1.62662	8.74738e-12	2.35146e-10	DOWNinCases	0
EPHA10.6036.78	EPHA10	EPHAA	Ephrin type-A receptor 10	1.32532	8.98075e-12	2.40035e-10	UPinCases	1
RABIF.18483.36	RABIF	MSS4	Guanine nucleotide exchange factor MSS4	0.438367	8.99514e-12	2.40035e-10	UPinCases	0
ANGPTL4.3796.79	ANGPTL4	ANGL4	Angiopoietin-related protein 4	0.63067	9.08273e-12	2.41488e-10	UPinCases	0
CBLN2.21887.2	CBLN2	CBLN2	Cerebellin-2	-0.817022	9.2116e-12	2.43156e-10	DOWNinCases	1
THBS3.8982.65	THBS3	TSP3	Thrombospondin-3	-0.958518	9.21224e-12	2.43156e-10	DOWNinCases	1
KAT5.25879.6	KAT5	KAT5	Histone acetyltransferase KAT5	-1.55644	1.00334e-11	2.63344e-10	DOWNinCases	0
CA13.3420.21	CA13	Carbonic anhydrase XIII	Carbonic anhydrase 13	-1.5038	1.00494e-11	2.63344e-10	DOWNinCases	1
KATNAL1.24494.67	KATNAL1	KATL1	Katanin p60 ATPase-containing subunit A-like 1	-0.731239	1.01953e-11	2.66212e-10	DOWNinCases	0
RAB5C.14287.6	RAB5C	RAB5C	Ras-related protein Rab-5C	-1.23097	1.02328e-11	2.66235e-10	DOWNinCases	0
PTH1R.13470.43	PTH1R	PTH1R	Parathyroid hormone/parathyroid hormone-related peptide receptor	0.422963	1.02793e-11	2.66492e-10	UPinCases	0
TOLLIP.13963.7	TOLLIP	tollip	Toll-interacting protein	-1.48246	1.04385e-11	2.69662e-10	DOWNinCases	0
ENO2.10339.48	ENO2	NSE	Gamma-enolase	-1.18485	1.06142e-11	2.73232e-10	DOWNinCases	0
SCARB2.5100.53	SCARB2	LIMP II	Lysosome membrane protein 2	0.373856	1.06548e-11	2.73312e-10	UPinCases	0
RGS10.11634.32	RGS10	RGS10	Regulator of G-protein signaling 10	-1.25946	1.11377e-11	2.84695e-10	DOWNinCases	0
SCUBE3.16773.29	SCUBE3	SCUB3	Signal peptide, CUB and EGF-like domain-containing protein 3	1.98143	1.1554e-11	2.93715e-10	UPinCases	0
IL22RA2.9456.34	IL22RA2	IL-22BP	Interleukin-22 receptor subunit alpha-2	-0.843057	1.15712e-11	2.93715e-10	DOWNinCases	1
SCARF2.9925.56	SCARF2	SREC-II	Scavenger receptor class F member 2	0.502012	1.19819e-11	3.02045e-10	UPinCases	0
ARF5.18409.61	ARF5	ARF5	ADP-ribosylation factor 5	-0.4275	1.20029e-11	3.02045e-10	DOWNinCases	0
YWHAH.22049.24	YWHAH	14-3-3 eta	14-3-3 protein eta	-0.65663	1.20237e-11	3.02045e-10	DOWNinCases	0
PSMA1.3859.50	PSMA1	PSA1	Proteasome subunit alpha type-1	0.386473	1.25794e-11	3.14917e-10	UPinCases	0
VAC14.24951.3	VAC14	VAC14	Protein VAC14 homolog	-0.483413	1.31982e-11	3.28398e-10	DOWNinCases	0
CLEC3B.5701.81	CLEC3B	Tetranectin	Tetranectin	-0.571738	1.32122e-11	3.28398e-10	DOWNinCases	0
CAVIN1.24689.9	CAVIN1	PTRF	Polymerase I and transcript release factor	-1.20019	1.32531e-11	3.28398e-10	DOWNinCases	0
TBK1.3400.49	TBK1	TBK1	Serine/threonine-protein kinase TBK1	0.465258	1.33779e-11	3.30365e-10	UPinCases	0
TNKS.9907.216	TNKS	Tankyrase-1	Tankyrase-1	0.364675	1.35084e-11	3.32463e-10	UPinCases	0
KIR3DL2.5096.51	KIR3DL2	KI3L2	Killer cell immunoglobulin-like receptor 3DL2	0.475527	1.38982e-11	3.40903e-10	UPinCases	0
SERPINE2.3217.74	SERPINE2	Protease nexin I	Glia-derived nexin	0.696328	1.45932e-11	3.56751e-10	UPinCases	0
LYN.3453.87	LYN	LYN	Tyrosine-protein kinase Lyn	-1.74758	1.47182e-11	3.58603e-10	DOWNinCases	0
CXCL10.4141.79	CXCL10	IP-10	C-X-C motif chemokine 10	1.57642	1.50245e-11	3.64846e-10	UPinCases	1
GRAMD1C.8336.267	GRAMD1C	GRM1C	GRAM domain-containing protein 1C	0.418828	1.56178e-11	3.77991e-10	UPinCases	0
ARHGAP6.25278.41	ARHGAP6	RHG06	Rho GTPase-activating protein 6	-2.03724	1.58136e-11	3.81464e-10	DOWNinCases	0
OPHN1.12591.27	OPHN1	Oligophrenin-1	Oligophrenin-1	-1.61459	1.58799e-11	3.818e-10	DOWNinCases	0
FTL.15324.58	FTL	Ferritin light chain	Ferritin light chain	1.6695	1.59689e-11	3.82675e-10	UPinCases	1
RAB11FIP3.25500.6	RAB11FIP3	RFIP3	Rab11 family-interacting protein 3	-1.19013	1.70805e-11	4.07973e-10	DOWNinCases	0
TCEAL1.20924.85	TCEAL1	TCAL1	Transcription elongation factor A protein-like 1	0.38443	1.75325e-11	4.17401e-10	UPinCases	0
SRSF7.12987.12	SRSF7	SRSF7	Serine/arginine-rich splicing factor 7	0.937026	1.76211e-11	4.18142e-10	UPinCases	1
FLNA.11245.43	FLNA	filamin A	Filamin-A	-1.11669	1.7888e-11	4.22525e-10	DOWNinCases	0
FGFBP1.15494.11	FGFBP1	FGFP1	Fibroblast growth factor-binding protein 1	2.37165	1.79549e-11	4.22525e-10	UPinCases	0
SAA2.18832.65	SAA2	SAA2	Serum amyloid A-2 protein	2.83221	1.79798e-11	4.22525e-10	UPinCases	1
TYRP1.21441.20	TYRP1	gp75	gp75	-0.579719	1.82553e-11	4.27621e-10	DOWNinCases	0
PPP1CC.19295.32	PPP1CC	PP1G	Serine/threonine-protein phosphatase PP1-gamma catalytic subunit	-1.54321	1.88464e-11	4.40052e-10	DOWNinCases	0
ECM1.3366.51	ECM1	ECM1	Extracellular matrix protein 1	-0.460257	1.90122e-11	4.42296e-10	DOWNinCases	0
SLC9A3R1.24694.158	SLC9A3R1	NHERF	Ezrin-radixin-moesin-binding phosphoprotein 50	-1.20351	1.9064e-11	4.42296e-10	DOWNinCases	0
SYTL4.9090.9	SYTL4	SYTL4	Synaptotagmin-like protein 4	-1.41436	1.97899e-11	4.5768e-10	DOWNinCases	0
CNTN1.2974.61	CNTN1	contactin-1	Contactin-1	-0.720572	2.04997e-11	4.71672e-10	DOWNinCases	1
MYL12A.19373.3	MYL12A	MLRM	Myosin regulatory light chain 12A	-1.68979	2.06159e-11	4.72285e-10	DOWNinCases	0
L1CAM.4246.40	L1CAM	NCAM-L1	Neural cell adhesion molecule L1	-1.00799	2.10806e-11	4.81417e-10	DOWNinCases	1
AGRN.15483.377	AGRN	Agrin	Agrin	0.723334	2.14503e-11	4.87058e-10	UPinCases	1
RGS18.13982.33	RGS18	RGS18	Regulator of G-protein signaling 18	-0.84153	2.14613e-11	4.87058e-10	DOWNinCases	0
EIF4E.19263.147	EIF4E	IF4E	Eukaryotic translation initiation factor 4E	-0.849641	2.15532e-11	4.87625e-10	DOWNinCases	0
FABP6.6450.8	FABP6	FABP6	Gastrotropin	0.550169	2.21559e-11	4.99707e-10	UPinCases	0
GOLPH3L.23542.8	GOLPH3L	GLP3L	Golgi phosphoprotein 3-like	-1.57948	2.29561e-11	5.16158e-10	DOWNinCases	0
MATK.3823.9	MATK	MATK	Megakaryocyte-associated tyrosine-protein kinase	0.607907	2.30669e-11	5.17053e-10	UPinCases	1
NECTIN1.8803.61	NECTIN1	nectin-1 gamma	Nectin-1, isoform gamma	0.421189	2.38025e-11	5.30713e-10	UPinCases	0
VOPP1.14618.26	VOPP1	ECOP	Vesicular, overexpressed in cancer, prosurvival protein 1	-0.490165	2.3826e-11	5.30713e-10	DOWNinCases	1
RBM39.4284.18	RBM39	RBM39	RNA-binding protein 39	0.65855	2.38948e-11	5.30713e-10	UPinCases	1
HARS1.17450.51	HARS1	Histidyl-tRNA synthetase	Histidine--tRNA ligase, cytoplasmic	-1.15635	2.40614e-11	5.32788e-10	DOWNinCases	0
ATP6V1C2.22824.53	ATP6V1C2	VATC2	V-type proton ATPase subunit C 2	-1.50606	2.47241e-11	5.44543e-10	DOWNinCases	0
DDX19A.18813.15	DDX19A	DD19A	ATP-dependent RNA helicase DDX19A	-1.41812	2.47418e-11	5.44543e-10	DOWNinCases	0
ARFIP2.12630.8	ARFIP2	ARFP2	Arfaptin-2	-0.671117	2.61075e-11	5.72255e-10	DOWNinCases	1
DOK2.19578.19	DOK2	DOK2	Docking protein 2	-1.5841	2.6158e-11	5.72255e-10	DOWNinCases	0
TXNL1.21475.137	TXNL1	TXNL1	Thioredoxin-like protein 1	-0.705898	2.69174e-11	5.85353e-10	DOWNinCases	0
INHBB.16746.12	INHBB	Activin B	Activin B	0.41732	2.70933e-11	5.87425e-10	UPinCases	0
ISOC1.9816.37	ISOC1	ISOC1	Isochorismatase domain-containing protein 1	-0.973142	2.90215e-11	6.27365e-10	DOWNinCases	0
FTH1.FTL.5934.1	FTH1	Ferritin	Ferritin	1.64014	2.9363e-11	6.32868e-10	UPinCases	1
CTDSPL.20929.4	CTDSPL	CTDSL	CTD small phosphatase-like protein	-1.42459	3.03656e-11	6.52548e-10	DOWNinCases	0
CHMP1B.18207.6	CHMP1B	CHM1B	Charged multivesicular body protein 1b	-1.41448	3.08437e-11	6.60871e-10	DOWNinCases	1
ETNK1.8328.9	ETNK1	EKI1	Ethanolamine kinase 1	0.397525	3.10771e-11	6.6254e-10	UPinCases	0
PENK.9076.25	PENK	PENK	Proenkephalin-A	-1.46949	3.11035e-11	6.6254e-10	DOWNinCases	1
MAPK8.3825.18	MAPK8	MK08	Mitogen-activated protein kinase 8	-0.725171	3.13504e-11	6.65273e-10	DOWNinCases	0
SSPN.23275.9	SSPN	SSPN	Sarcospan	-1.1384	3.14144e-11	6.65273e-10	DOWNinCases	0
ITGA5.ITGB1.21909.2	ITGA5	Integrin a5b1	Integrin a5b1	0.340635	3.16602e-11	6.68e-10	UPinCases	0
CLEC2D.7054.87	CLEC2D	CLC2D	C-type lectin domain family 2 member D	0.443406	3.17328e-11	6.68e-10	UPinCases	0
ADAMTS1.3174.2	ADAMTS1	ATS1	A disintegrin and metalloproteinase with thrombospondin motifs 1	0.535559	3.19973e-11	6.68e-10	UPinCases	0
ANTXR2.15559.5	ANTXR2	ANTR2	Anthrax toxin receptor 2	-1.16486	3.20016e-11	6.68e-10	DOWNinCases	1
SMURF1.11557.3	SMURF1	SMUF1	E3 ubiquitin-protein ligase SMURF1	0.400899	3.43107e-11	7.14153e-10	UPinCases	0
DDX19B.5460.60	DDX19B	DEAD-box protein 19B	ATP-dependent RNA helicase DDX19B	-1.32919	3.47169e-11	7.18502e-10	DOWNinCases	0
MGMT.21437.77	MGMT	MGMT	Methylated-DNA--protein-cysteine methyltransferase	-1.5197	3.5067e-11	7.23692e-10	DOWNinCases	0
GLUL.19238.12	GLUL	GLNA	Glutamine synthetase	0.844083	3.52283e-11	7.24966e-10	UPinCases	1
MPIG6B.7065.1	MPIG6B	G6B	Protein G6b	-1.48323	3.54847e-11	7.28187e-10	DOWNinCases	0
SNCG.19630.2	SNCG	g-Synuclein	Gamma-synuclein	0.633767	3.81338e-11	7.80351e-10	UPinCases	1
MAPRE1.19371.18	MAPRE1	MARE1	Microtubule-associated protein RP/EB family member 1	-1.49832	3.90625e-11	7.97116e-10	DOWNinCases	0
DARS1.12675.14	DARS1	SYDC	Aspartate--tRNA ligase, cytoplasmic	-1.31454	3.94337e-11	8.02443e-10	DOWNinCases	0
RAB6B.14271.23	RAB6B	RAB6B	Ras-related protein Rab-6B	-1.66113	3.95595e-11	8.0276e-10	DOWNinCases	0
ATRN.15499.11	ATRN	Attractin	Attractin	-0.345511	4.08663e-11	8.26974e-10	DOWNinCases	0
RBP1.19279.42	RBP1	CRBP	Retinol-binding protein 1	0.509537	4.25795e-11	8.59256e-10	UPinCases	0
VIL1.24901.4	VIL1	VILI	Villin-1	-1.90114	4.39561e-11	8.84585e-10	DOWNinCases	0
TPD52L2.23265.15	TPD52L2	TPD54	Tumor protein D54	-1.34303	4.46869e-11	8.95058e-10	DOWNinCases	0
SMAD5.21478.20	SMAD5	SMAD5	SMAD5	-1.58048	4.47222e-11	8.95058e-10	DOWNinCases	0
SRSF6.11573.3	SRSF6	SRSF6	Serine/arginine-rich splicing factor 6	0.980451	4.75325e-11	9.45817e-10	UPinCases	1
ARPC3.13573.5	ARPC3	p21-ARC	Actin-related protein 2/3 complex subunit 3	-0.681756	4.76479e-11	9.45817e-10	DOWNinCases	0
MTHFS.14107.1	MTHFS	MTHFS	5-formyltetrahydrofolate cyclo-ligase	-1.44791	4.80567e-11	9.5134e-10	DOWNinCases	0
CSNK1G1.20130.144	CSNK1G1	KC1G1	Casein kinase I isoform gamma-1	-1.54992	4.85681e-11	9.58858e-10	DOWNinCases	0
C5orf46.9100.32	C5orf46	CE046	Uncharacterized protein C5orf46	-1.2701	5.09026e-11	1.00223e-09	DOWNinCases	0
ARHGAP45.13544.9	ARHGAP45	HMHA1	Rho GTPase-activating protein 45	-1.4919	5.27357e-11	1.03553e-09	DOWNinCases	0
FAM160B1.25081.6	FAM160B1	F16B1	Protein FAM160B1	-1.70084	5.32749e-11	1.0433e-09	DOWNinCases	0
TBCB.17686.27	TBCB	TBCB	Tubulin-folding cofactor B	-1.27347	5.34836e-11	1.04458e-09	DOWNinCases	0
XPNPEP1.3481.87	XPNPEP1	XPNPEP1	Xaa-Pro aminopeptidase 1	-1.25737	5.46247e-11	1.06401e-09	DOWNinCases	0
CRYL1.24643.21	CRYL1	CRYL1	Lambda-crystallin homolog	-1.19705	5.58462e-11	1.08491e-09	DOWNinCases	0
CLIC3.24693.5	CLIC3	CLIC3	Chloride intracellular channel protein 3	1.31071	5.6988e-11	1.10285e-09	UPinCases	0
ITGA11.ITGB1.21698.11	ITGA11	Integrin a11b1	Integrin a11b1	-0.775759	5.71993e-11	1.10285e-09	DOWNinCases	0
GALK1.11448.34	GALK1	GALK1	Galactokinase	-1.2548	5.7224e-11	1.10285e-09	DOWNinCases	0
PDE5A.5256.86	PDE5A	PDE5A	cGMP-specific 3',5'-cyclic phosphodiesterase	-1.60893	5.76568e-11	1.10826e-09	DOWNinCases	0
ARF4.18408.26	ARF4	ARF4	ADP-ribosylation factor 4	-1.34849	5.8624e-11	1.12388e-09	DOWNinCases	0
RTN4IP1.18180.58	RTN4IP1	RT4I1	Reticulon-4-interacting protein 1, mitochondrial	-1.16098	6.08443e-11	1.16076e-09	DOWNinCases	0
MDH2.15534.26	MDH2	Malate dehydrogenase 2	Malate dehydrogenase, mitochondrial	-1.35787	6.08661e-11	1.16076e-09	DOWNinCases	0
KLC1.12656.1	KLC1	KLC1	Kinesin light chain 1	-1.46459	6.11826e-11	1.16375e-09	DOWNinCases	0
NAA80.21241.1	NAA80	NAT6	N-acetyltransferase 6	-1.63312	6.19858e-11	1.17595e-09	DOWNinCases	0
IFNB1.7243.8	IFNB1	IFN-b	Interferon beta	0.369502	6.22154e-11	1.17725e-09	UPinCases	0
ME2.25042.3	ME2	MAOM	NAD-dependent malic enzyme, mitochondrial	-1.18409	6.256e-11	1.1807e-09	DOWNinCases	0
DEFB118.9306.7	DEFB118	DB118	Beta-defensin 118	0.341061	6.38815e-11	1.20252e-09	UPinCases	0
IL4.2906.55	IL4	IL-4	Interleukin-4	0.452865	6.45192e-11	1.21131e-09	UPinCases	0
GRB2.5464.52	GRB2	GRB2 adapter protein	Growth factor receptor-bound protein 2	-1.22878	6.4681e-11	1.21131e-09	DOWNinCases	0
BPGM.12020.39	BPGM	PMGE	Bisphosphoglycerate mutase	1.33124	6.59757e-11	1.22924e-09	UPinCases	0
OAF.6414.8	OAF	OAF	Out at first protein homolog	0.583424	6.61793e-11	1.22989e-09	UPinCases	0
NARS1.21383.37	NARS1	SYNC	Asparaginyl-tRNA synthetase, cytoplasmic	-1.27738	6.7594e-11	1.25298e-09	DOWNinCases	0
BMP2.15666.21	BMP2	BMP-2	Bone morphogenetic protein 2	0.355057	6.95126e-11	1.28343e-09	UPinCases	0
RPIA.12333.87	RPIA	RPIA	Ribose-5-phosphate isomerase	0.687264	6.95886e-11	1.28343e-09	UPinCases	1
SERPINA3.4153.11	SERPINA3	alpha-1-antichymotrypsin complex	Alpha-1-antichymotrypsin complex	0.894946	7.00918e-11	1.28771e-09	UPinCases	1
SMAP1.11649.3	SMAP1	SMAP1	Stromal membrane-associated protein 1	-1.36693	7.08023e-11	1.29597e-09	DOWNinCases	0
RASA1.5481.16	RASA1	RASA1	Ras GTPase-activating protein 1	-1.21579	7.10334e-11	1.29694e-09	DOWNinCases	1
GAGE2D.22968.9	GAGE2D	GGE2D	G antigen 2D	-0.966998	7.13103e-11	1.29874e-09	DOWNinCases	0
INSR.3448.13	INSR	IR	Insulin receptor	-0.856845	7.24732e-11	1.31079e-09	DOWNinCases	1
ATL3.21544.4	ATL3	ATLA3	Atlastin-3	-0.666275	7.25116e-11	1.31079e-09	DOWNinCases	0
VPS53.25103.45	VPS53	VPS53	Vacuolar protein sorting-associated protein 53 homolog	-1.29612	7.28142e-11	1.31089e-09	DOWNinCases	0
AASDHPPT.17320.19	AASDHPPT	ADPPT	L-aminoadipate-semialdehyde dehydrogenase-phosphopantetheinyl transferase	-1.07162	7.28773e-11	1.31089e-09	DOWNinCases	0
PAGR1.23967.8	PAGR1	PA1	PAXIP1-associated protein 1	-1.62489	7.33718e-11	1.3137e-09	DOWNinCases	0
AP1G2.12714.38	AP1G2	AP1G2	AP-1 complex subunit gamma-like 2	-1.3746	7.33941e-11	1.3137e-09	DOWNinCases	0
PGK1.5020.50	PGK1	phosphoglycerate kinase 1	Phosphoglycerate kinase 1	-0.78848	7.4042e-11	1.32205e-09	DOWNinCases	0
MAPK3.2855.49	MAPK3	ERK-1	Mitogen-activated protein kinase 3	-1.28098	7.49558e-11	1.33227e-09	DOWNinCases	0
GAP43.15325.14	GAP43	NEUM	Neuromodulin	-2.12261	7.5062e-11	1.33227e-09	DOWNinCases	0
NID2.3633.70	NID2	NID2	Nidogen-2	0.630895	7.51629e-11	1.33227e-09	UPinCases	1
IL17D.4136.40	IL17D	IL-17D	Interleukin-17D	0.453488	7.86504e-11	1.3907e-09	UPinCases	0
NUBP1.21189.9	NUBP1	NUBP1	Nucleotide-binding protein 1	-0.960629	8.00813e-11	1.41257e-09	DOWNinCases	0
ILF3.12759.47	ILF3	DRBP76	Interleukin enhancer-binding factor 3	0.732973	8.8054e-11	1.54945e-09	UPinCases	1
PWWP2B.24267.24	PWWP2B	PWP2B	PWWP domain-containing protein 2B	0.38068	8.91049e-11	1.56417e-09	UPinCases	0
GSK3A.3441.64	GSK3A	GSK-3 alpha	Glycogen synthase kinase-3 alpha	-1.30425	9.12875e-11	1.59544e-09	DOWNinCases	0
PTGFRN.12727.7	PTGFRN	FPRP	Prostaglandin F2 receptor negative regulator	-0.641913	9.13243e-11	1.59544e-09	DOWNinCases	0
FGF5.3065.65	FGF5	FGF-5	Fibroblast growth factor 5	0.582668	9.16245e-11	1.59685e-09	UPinCases	0
PPP2R5A.13622.16	PPP2R5A	2A5A	Serine/threonine-protein phosphatase 2A 56 kDa regulatory subunit alpha isoform	-1.18245	9.26386e-11	1.60658e-09	DOWNinCases	0
ITIH4.4811.33	ITIH4	ITI heavy chain H4	Inter-alpha-trypsin inhibitor heavy chain H4	0.404065	9.26526e-11	1.60658e-09	UPinCases	0
SNX4.3903.49	SNX4	Sorting nexin 4	Sorting nexin-4	-1.50931	9.28443e-11	1.60658e-09	DOWNinCases	0
BCL2.3412.7	BCL2	Bcl-2	Apoptosis regulator Bcl-2	0.554286	9.59516e-11	1.65642e-09	UPinCases	0
NCKIPSD.23677.30	NCKIPSD	SPN90	NCK-interacting protein with SH3 domain	-1.56718	9.63432e-11	1.65924e-09	DOWNinCases	0
ROBO2.22578.17	ROBO2	ROBO2	Roundabout homolog 2	-0.792584	9.66251e-11	1.66017e-09	DOWNinCases	1
PLEK.7875.86	PLEK	PLEK	Pleckstrin	-1.19901	9.69242e-11	1.6614e-09	DOWNinCases	0
IRF6.9999.1	IRF6	IRF6	Interferon regulatory factor 6	-1.11575	9.74955e-11	1.66726e-09	DOWNinCases	0
CMIP.25100.11	CMIP	CMIP	C-Maf-inducing protein	-1.09146	9.81491e-11	1.67451e-09	DOWNinCases	0
RAB5B.19222.124	RAB5B	RAB5B	Ras-related protein Rab-5B	-1.04543	9.89714e-11	1.6846e-09	DOWNinCases	0
DERL1.13393.46	DERL1	DERL1	Derlin-1	-1.16876	9.96457e-11	1.69212e-09	DOWNinCases	0
CR2.15570.99	CR2	Complement receptor type 2	Complement receptor type 2	-1.27595	1.01007e-10	1.70866e-09	DOWNinCases	1
GRIPAP1.24432.3	GRIPAP1	GRAP1	GRIP1-associated protein 1	-1.67416	1.01089e-10	1.70866e-09	DOWNinCases	0
APCS.2474.54	APCS	SAP	Serum amyloid P-component	0.443749	1.02329e-10	1.72562e-09	UPinCases	0
CMA1.3423.59	CMA1	Chymase	Chymase	0.504525	1.04181e-10	1.7528e-09	UPinCases	0
RAB3D.19808.26	RAB3D	RAB3D	Ras-related protein Rab-3D	-1.56965	1.05546e-10	1.77167e-09	DOWNinCases	0
SYK.10722.13	SYK	KSYK	Tyrosine-protein kinase SYK	-0.872629	1.09965e-10	1.8416e-09	DOWNinCases	0
OIT3.6296.36	OIT3	OIT3	Oncoprotein-induced transcript 3 protein	1.10563	1.10817e-10	1.85161e-09	UPinCases	1
CD36.2973.15	CD36	CD36 ANTIGEN	Platelet glycoprotein 4	-1.04402	1.11606e-10	1.86052e-09	DOWNinCases	0
FAP.5029.3	FAP	SEPR	Prolyl endopeptidase FAP	-0.544001	1.25538e-10	2.08324e-09	DOWNinCases	1
POFUT1.5634.39	POFUT1	OFUT1	GDP-fucose protein O-fucosyltransferase 1	-0.782913	1.2758e-10	2.11232e-09	DOWNinCases	1
USP4.21763.46	USP4	UBP4	Ubiquitin carboxyl-terminal hydrolase 4	-1.37573	1.28586e-10	2.12414e-09	DOWNinCases	0
MAGEA6.22991.9	MAGEA6	MAGE-6	Melanoma-associated antigen 6	-0.557983	1.33114e-10	2.19397e-09	DOWNinCases	0
RAB3C.19586.89	RAB3C	RAB3C	Ras-related protein Rab-3C	-1.64149	1.33588e-10	2.19682e-09	DOWNinCases	0
MITD1.23266.62	MITD1	MITD1	MIT domain-containing protein 1	-1.51347	1.35998e-10	2.2314e-09	DOWNinCases	0
DDX6.12869.68	DDX6	DDX6	Probable ATP-dependent RNA helicase DDX6	-1.26476	1.38364e-10	2.26513e-09	DOWNinCases	0
MBNL1.24408.30	MBNL1	MBNL1	Muscleblind-like protein 1	-2.15993	1.39007e-10	2.27055e-09	DOWNinCases	0
CTNNB1.8418.30	CTNNB1	b-Catenin	Catenin beta-1	-0.446972	1.41596e-10	2.30767e-09	DOWNinCases	0
AHCYL1.12652.37	AHCYL1	SAHH2	Adenosylhomocysteinase 2	-1.49674	1.45522e-10	2.36635e-09	DOWNinCases	0
CRAT.12637.7	CRAT	CACP	Carnitine O-acetyltransferase	-1.68092	1.46853e-10	2.37751e-09	DOWNinCases	0
PDIA5.5593.11	PDIA5	PDIA5	Protein disulfide-isomerase A5	-1.7949	1.4686e-10	2.37751e-09	DOWNinCases	1
SNF8.21834.8	SNF8	SNF8	Vacuolar-sorting protein SNF8	0.423924	1.47379e-10	2.38062e-09	UPinCases	0
MYL12B.19122.47	MYL12B	ML12B	Myosin regulatory light chain 12B	-1.58944	1.48358e-10	2.39113e-09	DOWNinCases	0
LDLRAP1.18183.3	LDLRAP1	ARH	Low density lipoprotein receptor adapter protein 1	-1.70019	1.50509e-10	2.42043e-09	DOWNinCases	0
SNX12.24475.45	SNX12	SNX12	Sorting nexin-12	-1.20082	1.56898e-10	2.51254e-09	DOWNinCases	0
TCN2.5584.21	TCN2	Holo-TC II	Holo-Transcobalamin-2	0.7092	1.56926e-10	2.51254e-09	UPinCases	1
ARL11.12433.8	ARL11	ARL11	ADP-ribosylation factor-like protein 11	-0.696764	1.62416e-10	2.59473e-09	DOWNinCases	0
RAC2.18950.13	RAC2	RAC2	Ras-related C3 botulinum toxin substrate 2	-1.36505	1.67932e-10	2.67115e-09	DOWNinCases	0
IFNW1.7196.21	IFNW1	IFN-w	Interferon omega-1	0.362687	1.6887e-10	2.68021e-09	UPinCases	0
RAB5A.17205.21	RAB5A	RAB5A	Ras-related protein Rab-5A	-1.23018	1.7307e-10	2.7409e-09	DOWNinCases	0
HGF.2681.23	HGF	HGF	Hepatocyte growth factor	1.49928	1.80965e-10	2.85972e-09	UPinCases	0
VAPA.7167.102	VAPA	VAPA	Vesicle-associated membrane protein-associated protein A	-1.12636	1.83582e-10	2.89151e-09	DOWNinCases	0
SSR2.21837.3	SSR2	SSRB	Translocon-associated protein subunit beta	0.350071	1.8377e-10	2.89151e-09	UPinCases	0
BZW2.23659.2	BZW2	BZW2	Basic leucine zipper and W2 domain-containing protein 2	-1.67095	1.85793e-10	2.91703e-09	DOWNinCases	0
CD22.2891.1	CD22	CD22	B-cell receptor CD22	0.378571	1.88781e-10	2.95757e-09	UPinCases	0
TLL1.6383.90	TLL1	TLL1	Tolloid-like protein 1	-0.811381	1.92251e-10	3.00547e-09	DOWNinCases	1
ACOX1.21552.9	ACOX1	ACOX1	Peroxisomal acyl-coenzyme A oxidase 1	-1.57608	1.93348e-10	3.01615e-09	DOWNinCases	0
STUB1.10336.3	STUB1	CHIP	E3 ubiquitin-protein ligase CHIP	-1.37299	1.9484e-10	3.02784e-09	DOWNinCases	0
PDPK1.4460.8	PDPK1	PDPK1	3-phosphoinositide-dependent protein kinase 1	-1.27948	1.94929e-10	3.02784e-09	DOWNinCases	0
LRRC4C.9369.174	LRRC4C	NGL1	Leucine-rich repeat-containing protein 4C	-0.48766	2.00141e-10	3.10218e-09	DOWNinCases	1
SSMEM1.8298.8	SSMEM1	CG045	Serine-rich single-pass membrane protein 1	-1.21248	2.08502e-10	3.22493e-09	DOWNinCases	0
UFC1.3405.6	UFC1	UFC1	Ubiquitin-fold modifier-conjugating enzyme 1	-0.908212	2.13875e-10	3.30102e-09	DOWNinCases	0
IER3.9786.310	IER3	IEX1	Radiation-inducible immediate-early gene IEX-1	0.356075	2.21207e-10	3.40697e-09	UPinCases	0
IKBKG.21976.4	IKBKG	IKK-gamma	I-kappa-B kinase gamma	-1.29661	2.22966e-10	3.42681e-09	DOWNinCases	0
HIKESHI.8686.342	HIKESHI	HIKES	Protein Hikeshi	0.399576	2.25544e-10	3.45913e-09	UPinCases	0
CST7.3302.58	CST7	CYTF	Cystatin-F	1.15217	2.26132e-10	3.46086e-09	UPinCases	0
RBBP5.13631.1	RBBP5	RB binding protein 5	Retinoblastoma-binding protein 5	0.377164	2.29073e-10	3.49853e-09	UPinCases	0
HSPA1A.6563.78	HSPA1A	HSP 70	Heat shock 70 kDa protein 1A	0.751316	2.30025e-10	3.50571e-09	UPinCases	1
FCAR.4987.17	FCAR	FCAR	Immunoglobulin alpha Fc receptor	0.353015	2.31365e-10	3.51877e-09	UPinCases	0
RBBP4.15331.47	RBBP4	RBBP4	Histone-binding protein RBBP4	1.05606	2.32328e-10	3.52606e-09	UPinCases	1
DOK2.14246.50	DOK2	DOK2	Docking protein 2	-1.61868	2.38748e-10	3.61597e-09	DOWNinCases	0
CHST2.4428.1	CHST2	CHST2	Carbohydrate sulfotransferase 2	0.511851	2.4031e-10	3.63207e-09	UPinCases	0
GNAI3.12650.43	GNAI3	GNAI3	Guanine nucleotide-binding protein G(k) subunit alpha	-0.460383	2.44668e-10	3.69028e-09	DOWNinCases	0
MINAR1.9075.121	MINAR1	K1024	UPF0258 protein KIAA1024	0.336905	2.50774e-10	3.77456e-09	UPinCases	0
EIF4A1.18829.4	EIF4A1	IF4A1	Eukaryotic initiation factor 4A-I	-1.11673	2.53917e-10	3.81399e-09	DOWNinCases	0
TRIP10.17676.13	TRIP10	CIP4	Cdc42-interacting protein 4	-1.62631	2.5651e-10	3.84502e-09	DOWNinCases	0
KLB.19557.3	KLB	KLOTB	Beta-klotho	0.882996	2.61051e-10	3.90505e-09	UPinCases	1
ZADH2.17345.12	ZADH2	ZADH2	Prostaglandin reductase 3	-1.85533	2.64308e-10	3.94567e-09	DOWNinCases	0
PAFAH2.18914.188	PAFAH2	PAFA2	Platelet-activating factor acetylhydrolase 2, cytoplasmic	-0.650052	2.64989e-10	3.94774e-09	DOWNinCases	0
RPN2.21828.6	RPN2	RPN2	Ribophorin II	-0.472616	2.67937e-10	3.98351e-09	DOWNinCases	0
MBNL2.24446.65	MBNL2	MBNL2	Muscleblind-like protein 2	-2.19472	2.7226e-10	4.03723e-09	DOWNinCases	0
CA6.13747.9	CA6	Carbonic anhydrase 6	Carbonic anhydrase 6	-1.36884	2.72659e-10	4.03723e-09	DOWNinCases	1
TANK.14013.11	TANK	TANK	TRAF family member-associated NF-kappa-B activator	-0.916374	2.80462e-10	4.14435e-09	DOWNinCases	0
SRC.5488.74	SRC	SRCN1	Proto-oncogene tyrosine-protein kinase Src isoform 2	-1.75992	2.89822e-10	4.27399e-09	DOWNinCases	0
ENAH.9757.29	ENAH	ENAH	Protein enabled homolog	-1.18644	2.91359e-10	4.28798e-09	DOWNinCases	0
WAS.22033.32	WAS	WASP	Wiskott-Aldrich syndrome protein	-1.21206	2.95473e-10	4.33121e-09	DOWNinCases	0
NCK2.13615.60	NCK2	NCK2	Cytoplasmic protein NCK2	-1.49134	2.95486e-10	4.33121e-09	DOWNinCases	0
STIM1.8916.32	STIM1	STIM1	Stromal interaction molecule 1	-1.11349	3.07294e-10	4.48358e-09	DOWNinCases	0
CDH5.2819.23	CDH5	Cadherin-5	Cadherin-5	-0.504393	3.07417e-10	4.48358e-09	DOWNinCases	0
RPS6KB1.11817.1	RPS6KB1	KS6B1	Ribosomal protein S6 kinase beta-1	-1.08411	3.07727e-10	4.48358e-09	DOWNinCases	0
EPHA6.22587.37	EPHA6	EPHA6	Ephrin type-A receptor 6	-0.90947	3.09071e-10	4.49417e-09	DOWNinCases	1
CCNE1.19767.20	CCNE1	Cyclin E	G1/S-specific cyclin-E1	0.487803	3.13251e-10	4.54589e-09	UPinCases	0
PACSIN2.25048.30	PACSIN2	PACN2	Protein kinase C and casein kinase substrate in neurons protein 2	-1.33774	3.15357e-10	4.56735e-09	DOWNinCases	0
ZYX.13632.10	ZYX	Zyxin	Zyxin	-1.27113	3.19038e-10	4.61149e-09	DOWNinCases	0
SPHK1.4294.16	SPHK1	Sphingosine kinase 1	Sphingosine kinase 1	-1.72696	3.21198e-10	4.63352e-09	DOWNinCases	0
CRADD.15322.35	CRADD	CRADD	Death domain-containing protein CRADD	-0.787697	3.26912e-10	4.70663e-09	DOWNinCases	0
CASS4.12855.16	CASS4	CT032	Cas scaffolding protein family member 4	-0.67703	3.28127e-10	4.70969e-09	DOWNinCases	0
HADH.17739.1	HADH	HCDH	Hydroxyacyl-coenzyme A dehydrogenase, mitochondrial	-1.61153	3.28418e-10	4.70969e-09	DOWNinCases	0
GFRA1.3314.74	GFRA1	GFRa-1	GDNF family receptor alpha-1	1.54586	3.39453e-10	4.84885e-09	UPinCases	1
GDF10.16749.79	GDF10	BMP-3b	Growth/differentiation factor 10	0.377532	3.44591e-10	4.91261e-09	UPinCases	0
FGF8.2443.10	FGF8	FGF-8B	Fibroblast growth factor 8 isoform B	0.528409	3.46514e-10	4.93039e-09	UPinCases	0
ERBB2.2616.23	ERBB2	ERBB2	Receptor tyrosine-protein kinase erbB-2	0.353014	3.49281e-10	4.96006e-09	UPinCases	0
UBE2D1.UBB.21926.24	UBE2D1	UB2D1/ PolyUbiquitin K48	UB2D1/ PolyUbiquitin K48	-1.31857	3.64766e-10	5.16988e-09	DOWNinCases	0
SERPING1.13710.6	SERPING1	C1-Esterase Inhibitor	Plasma protease C1 inhibitor	0.401282	3.67793e-10	5.20266e-09	UPinCases	1
CA1.4969.2	CA1	Carbonic anhydrase I	Carbonic anhydrase 1	1.20631	3.72747e-10	5.26253e-09	UPinCases	0
HES5.22466.27	HES5	HES5	Transcription factor HES-5	-0.465044	3.74635e-10	5.27894e-09	DOWNinCases	0
TRIM40.22815.4	TRIM40	TRI40	Tripartite motif-containing protein 40	-0.826822	3.75359e-10	5.27894e-09	DOWNinCases	0
OPRPN.6530.63	OPRPN	PROL1	Opiorphin prepropeptide	0.322999	3.77837e-10	5.30356e-09	UPinCases	0
ATE1.25108.6	ATE1	ATE1	Arginyl-tRNA--protein transferase 1	-1.42099	3.97294e-10	5.56594e-09	DOWNinCases	0
TRAPPC6B.22812.4	TRAPPC6B	TPC6B	Trafficking protein particle complex subunit 6B	-0.706091	3.99374e-10	5.58434e-09	DOWNinCases	1
AGT.3484.60	AGT	Angiotensinogen	Angiotensinogen	0.556142	4.05428e-10	5.65813e-09	UPinCases	0
CBL.12016.60	CBL	CBL	E3 ubiquitin-protein ligase CBL	-1.20803	4.0837e-10	5.68829e-09	DOWNinCases	0
CASP3.3593.72	CASP3	Caspase-3	Caspase-3	-1.48703	4.11409e-10	5.71229e-09	DOWNinCases	0
TMOD3.12861.13	TMOD3	TMOD3	Tropomodulin-3	-0.931474	4.11661e-10	5.71229e-09	DOWNinCases	0
NLRP10.12821.6	NLRP10	NAL10	NACHT, LRR and PYD domains-containing protein 10	-0.589955	4.20731e-10	5.82704e-09	DOWNinCases	0
YARS1.19270.26	YARS1	SYYC	Tyrosine--tRNA ligase, cytoplasmic	-1.57649	4.34577e-10	5.99602e-09	DOWNinCases	0
EIF2B1.10080.9	EIF2B1	EI2BA	Translation initiation factor eIF-2B subunit alpha	-1.51559	4.37051e-10	6.01875e-09	DOWNinCases	0
GMFG.13062.4	GMFG	GMFG	Glia maturation factor gamma	-1.24914	4.38749e-10	6.03073e-09	DOWNinCases	0
CHMP3.12508.9	CHMP3	CHMP3	Charged multivesicular body protein 3	-0.896911	4.42597e-10	6.06653e-09	DOWNinCases	0
MARS1.24425.8	MARS1	SYMC	Methionyl-tRNA synthetase, cytoplasmic	-1.62425	4.43019e-10	6.06653e-09	DOWNinCases	0
KIR2DL5A.7799.3	KIR2DL5A	KI2LA	Killer cell immunoglobulin-like receptor 2DL5A	-0.413976	4.47813e-10	6.12067e-09	DOWNinCases	0
MAP2K6.17175.5	MAP2K6	MP2K6	Dual specificity mitogen-activated protein kinase kinase 6	-0.340759	4.57477e-10	6.24105e-09	DOWNinCases	0
PLXNA1.9005.16	PLXNA1	PLXA1	Plexin-A1	-0.714197	4.63637e-10	6.31326e-09	DOWNinCases	0
FATE1.7740.33	FATE1	FATE1	Fetal and adult testis-expressed transcript protein	0.470439	4.67642e-10	6.35592e-09	UPinCases	0
RAB4B.23329.52	RAB4B	RAB4B	Ras-related protein Rab-4B	-1.553	4.71061e-10	6.39047e-09	DOWNinCases	0
SNX8.6925.26	SNX8	SNX8	Sorting nexin-8	-1.37098	4.73936e-10	6.41752e-09	DOWNinCases	1
CRABP2.11696.7	CRABP2	RABP2	Cellular retinoic acid-binding protein 2	-1.06318	4.76777e-10	6.44401e-09	DOWNinCases	1
GFPT2.23669.20	GFPT2	GFPT2	Glutamine--fructose-6-phosphate aminotransferase [isomerizing] 2	-0.457983	4.91069e-10	6.62489e-09	DOWNinCases	0
DEPP1.7178.59	DEPP1	DEPP	Protein DEPP	-1.00583	5.02191e-10	6.76209e-09	DOWNinCases	1
FLI1.21971.47	FLI1	FLI1	Friend leukemia integration 1 transcription factor	-1.78701	5.10624e-10	6.85064e-09	DOWNinCases	0
NTN1.9013.60	NTN1	NET1	Netrin-1	1.33512	5.34429e-10	7.15683e-09	UPinCases	1
ATP1B2.7218.87	ATP1B2	AT1B2	Sodium/potassium-transporting ATPase subunit beta-2	-0.821516	5.40051e-10	7.21885e-09	DOWNinCases	1
DNASE1L2.6324.11	DNASE1L2	DNSL2	Deoxyribonuclease-1-like 2	0.780681	5.42741e-10	7.24152e-09	UPinCases	1
NRXN1.22579.93	NRXN1	NRX1B	Neurexin-1-beta	0.490156	5.48317e-10	7.30254e-09	UPinCases	0
H12.2987.37	H1-2	Histone H1.2	Histone H1.2	1.00177	5.57895e-10	7.40962e-09	UPinCases	1
CCNYL1.22098.10	CCNYL1	CCYL1	Cyclin-Y-like protein 1	-0.348561	5.58391e-10	7.40962e-09	DOWNinCases	0
TGFB1.21925.15	TGFB1	TGF-b1	Transforming growth factor beta-1	0.478692	5.60179e-10	7.41983e-09	UPinCases	0
NFKBID.19123.6	NFKBID	IKBD	NF-kappa-B inhibitor delta	-0.351258	5.61483e-10	7.42361e-09	DOWNinCases	0
ZKSCAN7.23570.87	ZKSCAN7	ZKSC7	Zinc finger protein with KRAB and SCAN domains 7	0.445103	5.67512e-10	7.48972e-09	UPinCases	0
AMPD2.18403.25	AMPD2	AMPD2	AMP deaminase 2	-1.69092	5.72445e-10	7.54116e-09	DOWNinCases	0
HNRNPH1.14309.8	HNRNPH1	HNRH1	Heterogeneous nuclear ribonucleoprotein H	-0.383674	5.76048e-10	7.57493e-09	DOWNinCases	0
GJA1.9937.7	GJA1	CXA1	Gap junction alpha-1 protein	0.444007	5.82154e-10	7.64142e-09	UPinCases	0
PPIF.8095.213	PPIF	Cyclophilin F	Peptidyl-prolyl cis-trans isomerase F, mitochondrial	-1.96042	5.93979e-10	7.78262e-09	DOWNinCases	0
NAA10.17854.33	NAA10	NAA10	N-alpha-acetyltransferase 10	-1.01398	6.10944e-10	7.99054e-09	DOWNinCases	0
CIRBP.12724.81	CIRBP	CIRBP	Cold-inducible RNA-binding protein	-1.17405	6.16012e-10	8.03536e-09	DOWNinCases	0
TSG101.13044.5	TSG101	TS101	Tumor susceptibility gene 101 protein	-1.35488	6.16577e-10	8.03536e-09	DOWNinCases	0
NEFL.10082.251	NEFL	NFL	Neurofilament light polypeptide	0.878012	6.21197e-10	8.05766e-09	UPinCases	0
ARL6IP1.24699.20	ARL6IP1	AR6P1	ADP-ribosylation factor-like protein 6-interacting protein 1	-1.39238	6.21522e-10	8.05766e-09	DOWNinCases	0
IL10RA.9768.5	IL10RA	IL-10 Ra	Interleukin-10 receptor subunit alpha	0.367272	6.21606e-10	8.05766e-09	UPinCases	0
OVCA2.17697.2	OVCA2	OVCA2	Esterase OVCA2	-1.31102	6.28008e-10	8.12617e-09	DOWNinCases	0
PLEKHA3.23392.41	PLEKHA3	PKHA3	Pleckstrin homology domain-containing family A member 3	-0.963014	6.31221e-10	8.15327e-09	DOWNinCases	0
ARL2BP.18407.36	ARL2BP	AR2BP	ADP-ribosylation factor-like protein 2-binding protein	-0.826336	6.34881e-10	8.18364e-09	DOWNinCases	0
CSF1R.2638.12	CSF1R	M-CSF R	Macrophage colony-stimulating factor 1 receptor	-0.97454	6.35819e-10	8.18364e-09	DOWNinCases	1
DCN.2666.53	DCN	Bone proteoglycan II	Decorin	0.609585	6.39285e-10	8.21374e-09	UPinCases	1
CYTH3.21365.5	CYTH3	CYH3	Cytohesin-3	-0.895562	6.46719e-10	8.29463e-09	DOWNinCases	0
STUB1.11350.30	STUB1	CHIP	E3 ubiquitin-protein ligase CHIP	-0.892973	6.49397e-10	8.31433e-09	DOWNinCases	0
CPNE1.5346.24	CPNE1	CPNE1	Copine-1	-1.18657	6.75383e-10	8.63186e-09	DOWNinCases	1
ROBO3.5117.14	ROBO3	ROBO3	Roundabout homolog 3	0.355539	6.86039e-10	8.7527e-09	UPinCases	0
RER1.24677.106	RER1	RER1	Protein RER1	-1.10536	6.95907e-10	8.86308e-09	DOWNinCases	0
PTPN11.11830.48	PTPN11	SHP-2	Tyrosine-protein phosphatase non-receptor type 11	-1.0214	7.02788e-10	8.9351e-09	DOWNinCases	0
CAB39L.21154.8	CAB39L	CB39L	Calcium-binding protein 39-like	-1.07005	7.11665e-10	9.02451e-09	DOWNinCases	0
YWHAZ.5858.6	YWHAZ	14-3-3 protein zeta/delta	14-3-3 protein zeta/delta	-0.776663	7.12298e-10	9.02451e-09	DOWNinCases	0
PLA2G12A.21563.3	PLA2G12A	sPLA(2)-XII	sPLA(2)-XII	-0.978206	7.14543e-10	9.03723e-09	DOWNinCases	0
CLIC1.5013.2	CLIC1	NCC27	Chloride intracellular channel protein 1	-1.17897	7.2372e-10	9.13743e-09	DOWNinCases	0
HMOX2.2622.18	HMOX2	HO-2	Heme oxygenase 2	0.445962	7.30886e-10	9.21194e-09	UPinCases	0
GDF9.3067.67	GDF9	GDF-9	Growth/differentiation factor 9	0.856966	7.47631e-10	9.40672e-09	UPinCases	1
DLGAP4.24436.23	DLGAP4	DLGP4	Disks large-associated protein 4	-1.56866	7.55537e-10	9.4898e-09	DOWNinCases	0
IL1RL1.4234.8	IL1RL1	IL-1 R4	Interleukin-1 receptor-like 1	1.73993	7.75807e-10	9.7167e-09	UPinCases	1
PLXNC1.4564.2	PLXNC1	PLXC1	Plexin-C1	-0.720199	7.76269e-10	9.7167e-09	DOWNinCases	0
MRAP.7895.108	MRAP	MRAP	Melanocortin-2 receptor accessory protein	0.337896	7.782e-10	9.72416e-09	UPinCases	0
LCP1.17231.1	LCP1	L-plastin	Plastin-2	0.469594	7.9146e-10	9.87292e-09	UPinCases	1
IFT22.20451.126	IFT22	IFT22	Intraflagellar transport protein 22 homolog	-0.479265	7.9425e-10	9.87906e-09	DOWNinCases	0
SH3GL2.12499.108	SH3GL2	SH3G2	Endophilin-A1	-1.4572	7.94664e-10	9.87906e-09	DOWNinCases	0
RBPMS2.23300.3	RBPMS2	RBPS2	RNA-binding protein with multiple splicing 2	-1.49419	7.99187e-10	9.91837e-09	DOWNinCases	0
RBM3.12747.89	RBM3	RBM3	RNA-binding protein 3	-0.964022	8.11802e-10	1.00407e-08	DOWNinCases	0
CXCL3.22973.8	CXCL3	Gro-g	Gro-gamma	-1.68529	8.47561e-10	1.04475e-08	DOWNinCases	0
GDNF.5822.22	GDNF	GDNF	Glial cell line-derived neurotrophic factor	0.449572	8.54075e-10	1.051e-08	UPinCases	0
RAB22A.12408.333	RAB22A	RB22A	Ras-related protein Rab-22A	-1.11352	9.46781e-10	1.16312e-08	DOWNinCases	0
TEC.16079.2	TEC	TEC	Tyrosine-protein kinase Tec	-0.773258	9.48557e-10	1.16334e-08	DOWNinCases	0
PTGS2.3761.4	PTGS2	COX-2	Prostaglandin G/H synthase 2	0.427143	9.53408e-10	1.16732e-08	UPinCases	0
BDP1.8929.7	BDP1	BDP1	Transcription factor TFIIIB component B'' homolog	0.370304	9.74897e-10	1.18982e-08	UPinCases	0
AKT1.15627.83	AKT1	PKB	RAC-alpha serine/threonine-protein kinase	-1.3742	9.75052e-10	1.18982e-08	DOWNinCases	0
KIAA2013.6538.90	KIAA2013	K2013	Uncharacterized protein KIAA2013	0.568943	9.80445e-10	1.19441e-08	UPinCases	0
ALG2.23654.6	ALG2	ALG2	Alpha-1,3-mannosyltransferase ALG2	-1.02744	9.83635e-10	1.19629e-08	DOWNinCases	0
AARS1.12340.17	AARS1	SYAC	Alanine--tRNA ligase, cytoplasmic	-1.24381	9.86152e-10	1.19735e-08	DOWNinCases	0
IFNA4.15405.23	IFNA4	IFNA4	Interferon alpha-4	0.349612	1.00434e-09	1.21741e-08	UPinCases	1
PES1.4267.81	PES1	PESC	Pescadillo homolog	0.492555	1.01327e-09	1.22619e-08	UPinCases	0
CCL13.4144.13	CCL13	MCP-4	C-C motif chemokine 13	0.507505	1.02191e-09	1.2346e-08	UPinCases	0
DCTD.17756.69	DCTD	DCTD	Deoxycytidylate deaminase	-1.25103	1.02879e-09	1.23922e-08	DOWNinCases	0
MPL.3473.78	MPL	Thrombopoietin Receptor	Thrombopoietin Receptor	-0.434882	1.02914e-09	1.23922e-08	DOWNinCases	0
SLC27A2.9045.3	SLC27A2	S27A2	Very long-chain acyl-CoA synthetase	-0.604543	1.03975e-09	1.24993e-08	DOWNinCases	0
THOC1.9875.107	THOC1	THOC1	THO complex subunit 1	0.365046	1.08575e-09	1.30093e-08	UPinCases	0
ARFIP1.13488.3	ARFIP1	ARFP1	Arfaptin-1	-1.30895	1.10175e-09	1.31793e-08	DOWNinCases	0
FURIN.6276.16	FURIN	Furin	Furin	0.583315	1.10968e-09	1.32525e-08	UPinCases	1
NTM.8428.102	NTM	NTRI	Neurotrimin	-0.671348	1.11344e-09	1.32756e-08	DOWNinCases	1
HOPX.19196.73	HOPX	HOP	Homeodomain-only protein	0.860014	1.1521e-09	1.36918e-08	UPinCases	0
GRK2.3347.9	GRK2	BARK1	beta-adrenergic receptor kinase 1	-1.27997	1.17154e-09	1.38778e-08	DOWNinCases	0
UBXN4.9997.12	UBXN4	UBXN4	UBX domain-containing protein 4	-1.20083	1.17156e-09	1.38778e-08	DOWNinCases	0
ZC3H12A.23680.1	ZC3H12A	MCPIP	MCP-1 Induced Protein	-0.837632	1.1859e-09	1.40243e-08	DOWNinCases	0
DNM2.11572.4	DNM2	DYN2	Dynamin-2	-1.39013	1.18822e-09	1.40243e-08	DOWNinCases	0
C9.13722.105	C9	C9	Complement component C9	0.437919	1.18971e-09	1.40243e-08	UPinCases	1
MAPK9.9760.13	MAPK9	JNK2	Mitogen-activated protein kinase 9	-0.899801	1.19476e-09	1.40611e-08	DOWNinCases	0
POLR2K.19134.66	POLR2K	RPAB4	DNA-directed RNA polymerases I, II, and III subunit RPABC4	-1.02425	1.20518e-09	1.41608e-08	DOWNinCases	0
THEM4.23298.148	THEM4	THEM4	Acyl-coenzyme A thioesterase THEM4	-1.39238	1.21796e-09	1.4288e-08	DOWNinCases	0
GPCPD1.12786.61	GPCPD1	GDE5	Glycerophosphocholine phosphodiesterase GPCPD1	-0.748547	1.22421e-09	1.43382e-08	DOWNinCases	0
AKR7A2.4188.1	AKR7A2	Aflatoxin B1 aldehyde reductase	Aflatoxin B1 aldehyde reductase member 2	-1.27224	1.23607e-09	1.44538e-08	DOWNinCases	0
PTPN6.4318.12	PTPN6	PTP-1C	Tyrosine-protein phosphatase non-receptor type 6	-1.02433	1.24221e-09	1.45024e-08	DOWNinCases	0
DECR1.12687.2	DECR1	DECR	2,4-dienoyl-CoA reductase, mitochondrial	-1.57325	1.24641e-09	1.45099e-08	DOWNinCases	0
CDKN2D.12376.85	CDKN2D	p19-INK4d	Cyclin-dependent kinase 4 inhibitor D	-1.32907	1.24684e-09	1.45099e-08	DOWNinCases	0
MEIS2.23568.41	MEIS2	MEIS2	Homeobox protein Meis2	-1.3092	1.27607e-09	1.48264e-08	DOWNinCases	0
KDM4C.25298.53	KDM4C	KDM4C	Lysine-specific demethylase 4C	-1.49159	1.31542e-09	1.5235e-08	DOWNinCases	0
FAF2.9738.7	FAF2	FAF2	FAS-associated factor 2	-1.33222	1.338e-09	1.54719e-08	DOWNinCases	0
IL21R.9366.54	IL21R	IL-21 sR	Interleukin-21 receptor	0.523944	1.37012e-09	1.57932e-08	UPinCases	0
SIRT2.5030.52	SIRT2	SIRT2	NAD-dependent protein deacetylase sirtuin-2	-0.765886	1.4046e-09	1.61651e-08	DOWNinCases	1
ZNF580.24430.11	ZNF580	ZN580	Zinc finger protein 580	0.336028	1.40951e-09	1.61961e-08	UPinCases	0
TPM4.9863.1	TPM4	Tropomyosin 4	Tropomyosin alpha-4 chain	-1.14809	1.41181e-09	1.61969e-08	DOWNinCases	0
GGA1.13594.158	GGA1	GGA1	ADP-ribosylation factor-binding protein GGA1	-1.02684	1.43354e-09	1.64204e-08	DOWNinCases	0
PLA2G2A.2692.74	PLA2G2A	NPS-PLA2	Phospholipase A2, membrane associated	2.04311	1.44667e-09	1.65448e-08	UPinCases	1
DUSP21.21191.24	DUSP21	DUS21	Dual specificity protein phosphatase 21	-0.616626	1.45444e-09	1.66075e-08	DOWNinCases	0
SLMAP.7191.32	SLMAP	SLMAP	Sarcolemmal membrane-associated protein	-0.99335	1.46033e-09	1.66487e-08	DOWNinCases	0
TFCP2L1.25104.10	TFCP2L1	TF2L1	Transcription factor CP2-like protein 1	-1.51034	1.46948e-09	1.67268e-08	DOWNinCases	0
CDC42BPB.3629.60	CDC42BPB	MRCKB	Serine/threonine-protein kinase MRCK beta	0.457723	1.47804e-09	1.67904e-08	UPinCases	0
SPAST.10870.32	SPAST	Spastin	Spastin	-1.14555	1.47968e-09	1.67904e-08	DOWNinCases	0
IRF3.17151.84	IRF3	IRF-3	Interferon regulatory factor 3	-1.2067	1.48764e-09	1.68546e-08	DOWNinCases	0
F11R.20511.3	F11R	JAM-A	Junctional adhesion molecule A	-1.06113	1.50897e-09	1.70696e-08	DOWNinCases	0
CCL22.3508.78	CCL22	MDC	C-C motif chemokine 22	-1.17183	1.51336e-09	1.70928e-08	DOWNinCases	1
HPSE.5604.30	HPSE	HPSE	Heparanase	1.30475	1.52881e-09	1.72405e-08	UPinCases	0
QTRT2.21373.8	QTRT2	QTRD1	Queuine tRNA-ribosyltransferase subunit QTRTD1	-0.666177	1.53607e-09	1.7269e-08	DOWNinCases	0
NID1.3213.65	NID1	Nidogen	Nidogen-1	0.623292	1.54544e-09	1.73316e-08	UPinCases	1
SEMA4G.20540.65	SEMA4G	SEM4G	Semaphorin-4G	0.721774	1.5474e-09	1.73316e-08	UPinCases	1
TNFAIP3.14009.65	TNFAIP3	TNFAIP3	Tumor necrosis factor alpha-induced protein 3	-0.635967	1.54878e-09	1.73316e-08	DOWNinCases	0
CCL7.22969.12	CCL7	MCP-3	C-C motif chemokine 7	1.12338	1.56001e-09	1.74305e-08	UPinCases	0
NOP16.18228.30	NOP16	NOP16	Nucleolar protein 16	0.456146	1.58483e-09	1.76807e-08	UPinCases	0
RBFOX1.22074.35	RBFOX1	Ataxin-2-binding protein 1	Ataxin-2-binding protein 1	0.416757	1.58764e-09	1.76849e-08	UPinCases	0
COLGALT2.7234.12	COLGALT2	GT252	Procollagen galactosyltransferase 2	0.347266	1.62803e-09	1.81071e-08	UPinCases	0
CILP2.8841.65	CILP2	CILP2	Cartilage intermediate layer protein 2	-0.846193	1.63727e-09	1.81822e-08	DOWNinCases	1
MANBA.6382.17	MANBA	MANBA	Beta-mannosidase	-0.633148	1.66337e-09	1.84439e-08	DOWNinCases	0
NECTIN1.20584.4	NECTIN1	nectin-1 gamma	Nectin-1, isoform gamma	-0.417741	1.67642e-09	1.85603e-08	DOWNinCases	0
LIMD2.20991.2	LIMD2	LIMD2	LIM domain-containing protein 2	-1.34854	1.72945e-09	1.90757e-08	DOWNinCases	0
ACTN1.9843.5	ACTN1	ACTN1	Alpha-actinin-1	-1.85655	1.73082e-09	1.90757e-08	DOWNinCases	0
TBCE.11211.7	TBCE	TBCE	Tubulin-specific chaperone E	-1.46916	1.75089e-09	1.92505e-08	DOWNinCases	0
IGDCC4.9793.145	IGDCC4	IGDC4	Immunoglobulin superfamily DCC subclass member 4	-0.743295	1.79575e-09	1.97019e-08	DOWNinCases	1
HSPA1A.4124.24	HSPA1A	HSP 70	Heat shock 70 kDa protein 1A	0.672459	1.83542e-09	2.0087e-08	UPinCases	1
REEP2.23305.38	REEP2	REEP2	Receptor expression-enhancing protein 2	-0.629445	1.83637e-09	2.0087e-08	DOWNinCases	0
CHAD.13460.4	CHAD	CHAD	Chondroadherin	-1.29987	1.85514e-09	2.02619e-08	DOWNinCases	1
ZBTB33.12785.49	ZBTB33	KAISO	Transcriptional regulator Kaiso	0.372535	1.87014e-09	2.03952e-08	UPinCases	0
CNTN6.20561.15	CNTN6	CNTN6	Contactin-6	-0.729291	1.89163e-09	2.05767e-08	DOWNinCases	1
EIF3M.23410.46	EIF3M	EIF3M	Eukaryotic translation initiation factor 3 subunit M	-1.30335	1.89243e-09	2.05767e-08	DOWNinCases	0
HOMER1.19229.92	HOMER1	HOME1	Homer protein homolog 1	-1.51244	1.89709e-09	2.05966e-08	DOWNinCases	0
SYK.11378.37	SYK	KSYK	Tyrosine-protein kinase SYK	-1.51416	1.93456e-09	2.09721e-08	DOWNinCases	0
GET3.13620.10	GET3	ASNA	ATPase ASNA1	0.431123	1.99774e-09	2.16249e-08	UPinCases	0
GOLM2.8838.10	GOLM2	CASC4	Protein CASC4	0.35639	2.01037e-09	2.16921e-08	UPinCases	0
GPX1.15591.28	GPX1	Glutathione peroxidase	Glutathione peroxidase 1	-1.09226	2.01288e-09	2.16921e-08	DOWNinCases	0
TNS2.11667.29	TNS2	TENC1	Tensin-2	0.381535	2.04883e-09	2.20143e-08	UPinCases	0
PID1.23291.18	PID1	PCLI1	PTB-containing, cubilin and LRP1-interacting protein	-0.66554	2.08163e-09	2.2301e-08	DOWNinCases	0
CLINT1.11659.31	CLINT1	EPN4	Clathrin interactor 1	-1.33922	2.11551e-09	2.26306e-08	DOWNinCases	0
TADA1.22796.17	TADA1	TADA1	Transcriptional adapter 1	-0.502282	2.13453e-09	2.28007e-08	DOWNinCases	0
KHSRP.24926.9	KHSRP	FUBP2	Far upstream element-binding protein 2	0.842426	2.14812e-09	2.29123e-08	UPinCases	1
CPTP.20385.21	CPTP	CPTP	Ceramide-1-phosphate transfer protein	-0.582255	2.19072e-09	2.33324e-08	DOWNinCases	0
DARS2.12395.86	DARS2	SYDM	Aspartate--tRNA ligase, mitochondrial	-1.87035	2.19424e-09	2.33358e-08	DOWNinCases	0
PLCB1.11354.21	PLCB1	Phospholipase C-beta-1	1-phosphatidylinositol 4,5-bisphosphate phosphodiesterase beta-1	-1.04443	2.22739e-09	2.36538e-08	DOWNinCases	0
YWHAG.8901.40	YWHAG	14-3-3 protein gamma	14-3-3 protein gamma	-0.778758	2.24457e-09	2.38016e-08	DOWNinCases	0
MCAM.20512.2	MCAM	MUC18	Melanoma-associated antigen MUC18	-0.525658	2.2567e-09	2.38955e-08	DOWNinCases	0
MPP2.24265.6	MPP2	MPP2	MAGUK p55 subfamily member 2	0.333107	2.29374e-09	2.42524e-08	UPinCases	0
SOST.5729.27	SOST	SOST	Sclerostin	0.388167	2.32191e-09	2.45146e-08	UPinCases	0
GMFB.17784.23	GMFB	GMFB	Glia maturation factor beta	-0.927065	2.3738e-09	2.50262e-08	DOWNinCases	0
RWDD4.21188.38	RWDD4	RWDD4	RWD domain-containing protein 4	-1.3678	2.4138e-09	2.54111e-08	DOWNinCases	0
AKT2.5360.9	AKT2	PKB beta	RAC-beta serine/threonine-protein kinase	-1.24149	2.42764e-09	2.552e-08	DOWNinCases	0
CSF1R.13682.47	CSF1R	M-CSF R	Macrophage colony-stimulating factor 1 receptor	-0.757217	2.44588e-09	2.56747e-08	DOWNinCases	1
UBE2K.17380.2	UBE2K	UBE2K	Ubiquitin-conjugating enzyme E2 K	-0.808191	2.46779e-09	2.58674e-08	DOWNinCases	0
CR1.19556.12	CR1	Complement receptor type 1	Complement receptor type 1	-0.77654	2.49327e-09	2.6097e-08	DOWNinCases	1
WWP1.11307.33	WWP1	WWP1	NEDD4-like E3 ubiquitin-protein ligase WWP1	-1.04911	2.52522e-09	2.63934e-08	DOWNinCases	0
GSK3B.24050.26	GSK3B	GSK-3 beta	Glycogen synthase kinase-3 beta	-1.59754	2.53521e-09	2.64599e-08	DOWNinCases	0
EIF2S1.19259.176	EIF2S1	IF2A	Eukaryotic translation initiation factor 2 subunit 1	-1.06812	2.55707e-09	2.66494e-08	DOWNinCases	0
SARG.24950.21	SARG	SARG	Specifically androgen-regulated gene protein	-1.22279	2.56068e-09	2.66494e-08	DOWNinCases	1
TINAGL1.11192.168	TINAGL1	TINAL	Tubulointerstitial nephritis antigen-like	0.658207	2.56866e-09	2.66943e-08	UPinCases	0
BMP4.15667.39	BMP4	BMP-4	Bone morphogenetic protein 4	-0.721532	2.58598e-09	2.6836e-08	DOWNinCases	0
H3C1.14146.92	H3C1	H31	Histone H3.1	1.06423	2.68907e-09	2.78661e-08	UPinCases	1
HSPB1.11103.24	HSPB1	HSP 27	Heat shock protein beta-1	-1.52273	2.79167e-09	2.88882e-08	DOWNinCases	0
S100A5.15303.63	S100A5	S100A5	Protein S100-A5	-1.11087	2.8272e-09	2.92144e-08	DOWNinCases	0
PRKAA2.PRKAB2.PRKAG1.5245.40	PRKAA2	AMPK a2b2g1	AMP Kinase (alpha2beta2gamma1)	-1.34995	2.84932e-09	2.94012e-08	DOWNinCases	0
ABL2.5261.13	ABL2	ABL2	Abelson tyrosine-protein kinase 2	0.642912	2.85866e-09	2.94559e-08	UPinCases	0
ALB.18380.78	ALB	Albumin	Serum albumin	-0.434107	2.87055e-09	2.95366e-08	DOWNinCases	0
IBSP.3415.61	IBSP	BSP	Bone sialoprotein 2	1.34448	2.9532e-09	3.03015e-08	UPinCases	1
TNFRSF10B.5534.49	TNFRSF10B	TRAIL R2	Tumor necrosis factor receptor superfamily member 10B	0.706422	3.14241e-09	3.21072e-08	UPinCases	1
CA6.3352.80	CA6	Carbonic anhydrase 6	Carbonic anhydrase 6	-1.71225	3.1768e-09	3.24132e-08	DOWNinCases	1
PSMB4.18340.2	PSMB4	Proteasome beta chain	Proteasome subunit beta type-4	0.565652	3.23962e-09	3.30079e-08	UPinCases	1
POSTN.6645.53	POSTN	Periostin	Periostin	-0.704875	3.27902e-09	3.32766e-08	DOWNinCases	1
BTN3A1.7081.2	BTN3A1	BT3A1	Butyrophilin subfamily 3 member A1	0.456421	3.27969e-09	3.32766e-08	UPinCases	0
METAP1.3210.1	METAP1	METAP1	Methionine aminopeptidase 1	-0.851189	3.28751e-09	3.33095e-08	DOWNinCases	0
VAV1.5275.28	VAV1	VAV	Proto-oncogene vav	-1.14598	3.33651e-09	3.37261e-08	DOWNinCases	0
RBFOX2.11462.8	RBFOX2	RBM9	RNA binding protein fox-1 homolog 2	0.656076	3.33789e-09	3.37261e-08	UPinCases	0
DLX4.11910.27	DLX4	DLX4	Homeobox protein DLX-4	-1.26818	3.40721e-09	3.43788e-08	DOWNinCases	0
ROBO2.5116.62	ROBO2	ROBO2	Roundabout homolog 2	-0.454063	3.44314e-09	3.46934e-08	DOWNinCases	0
ACSF2.17466.72	ACSF2	ACSF2	Acyl-CoA synthetase family member 2, mitochondrial	-0.9196	3.45027e-09	3.47172e-08	DOWNinCases	0
LY75.16620.26	LY75	LY75	Lymphocyte antigen 75	-0.716473	3.45552e-09	3.4722e-08	DOWNinCases	0
TIMM10B.23241.27	TIMM10B	T10B	Mitochondrial import inner membrane translocase subunit Tim10 B	-1.12177	3.47775e-09	3.48973e-08	DOWNinCases	0
VWA2.7128.9	VWA2	VWA2	von Willebrand factor A domain-containing protein 2	-0.405926	3.49222e-09	3.49943e-08	DOWNinCases	0
ERC1.24983.119	ERC1	RB6I2	ELKS/RAB6-interacting/CAST family member 1	-1.68455	3.56602e-09	3.56847e-08	DOWNinCases	0
S100P.9926.4	S100P	S100P	Protein S100-P	-0.343682	3.57149e-09	3.56904e-08	DOWNinCases	0
CETP.7131.8	CETP	CETP	Cholesteryl ester transfer protein	0.803818	3.68766e-09	3.67505e-08	UPinCases	0
MAPKAPK2.3820.68	MAPKAPK2	MAPK2	MAP kinase-activated protein kinase 2	-1.32094	3.74399e-09	3.72609e-08	DOWNinCases	0
UBTD2.12875.28	UBTD2	UBTD2	Ubiquitin domain-containing protein 2	0.524622	3.76967e-09	3.74653e-08	UPinCases	0
PYCARD.24671.15	PYCARD	ASC	Apoptosis-associated speck-like protein containing a CARD	0.449646	3.78027e-09	3.75195e-08	UPinCases	0
PFN1.20243.26	PFN1	Profilin-1	Profilin-1	-0.935545	3.80257e-09	3.76894e-08	DOWNinCases	0
MAPKAPK3.3822.54	MAPKAPK3	MAPKAPK3	MAP kinase-activated protein kinase 3	-1.2956	3.84637e-09	3.80718e-08	DOWNinCases	0
ARHGAP26.24937.7	ARHGAP26	RHG26	Rho GTPase-activating protein 26	-0.329485	3.9909e-09	3.94488e-08	DOWNinCases	0
PPP1R9B.21991.79	PPP1R9B	NEB2	Neurabin-2	-1.52846	4.05091e-09	3.99876e-08	DOWNinCases	0
SCP2.24293.39	SCP2	NLTP	Nonspecific lipid-transfer protein	-1.08659	4.07711e-09	4.01918e-08	DOWNinCases	0
ARFGAP2.11664.32	ARFGAP2	ARFG2	ADP-ribosylation factor GTPase-activating protein 2	-1.42633	4.09893e-09	4.03523e-08	DOWNinCases	0
GSPT2.24253.5	GSPT2	ERF3B	Eukaryotic peptide chain release factor GTP-binding subunit ERF3B	-0.423757	4.10976e-09	4.03987e-08	DOWNinCases	0
UBE2N.3905.62	UBE2N	UBE2N	Ubiquitin-conjugating enzyme E2 N	-0.620985	4.11474e-09	4.03987e-08	DOWNinCases	0
SFRP4.17447.52	SFRP4	SFRP4	Secreted frizzled-related protein 4	-1.0103	4.15679e-09	4.07129e-08	DOWNinCases	1
FYN.3813.3	FYN	FYN	Tyrosine-protein kinase Fyn	-1.10002	4.15791e-09	4.07129e-08	DOWNinCases	0
UNC45A.13082.9	UNC45A	UN45A	Protein unc-45 homolog A	-1.61436	4.17014e-09	4.07778e-08	DOWNinCases	0
ATG4C.25078.13	ATG4C	ATG4C	Cysteine protease ATG4C	-0.881518	4.3085e-09	4.2018e-08	DOWNinCases	0
ACADSB.17403.14	ACADSB	acyl-Coenzyme A dehydrogenase	Short/branched chain specific acyl-CoA dehydrogenase, mitochondrial	-1.00029	4.33713e-09	4.22406e-08	DOWNinCases	0
STAC.25125.7	STAC	STAC	SH3 and cysteine-rich domain-containing protein	0.347687	4.35531e-09	4.2361e-08	UPinCases	0
KPNB1.3887.90	KPNB1	IMB1	Importin subunit beta-1	-1.19629	4.46473e-09	4.33674e-08	DOWNinCases	0
RAB18.12945.33	RAB18	RAB18	Ras-related protein Rab-18	-0.651524	4.50403e-09	4.36596e-08	DOWNinCases	0
PICK1.21876.266	PICK1	PICK1	PRKCA-binding protein	-0.657733	4.5068e-09	4.36596e-08	DOWNinCases	0
TXNDC12.19334.62	TXNDC12	TXD12	Thioredoxin domain-containing protein 12	-1.10595	4.51666e-09	4.3697e-08	DOWNinCases	0
LGALS7.9400.40	LGALS7	Galectin-7	Galectin-7	0.441942	4.59848e-09	4.44296e-08	UPinCases	0
EMILIN3.8773.172	EMILIN3	EMIL3	EMILIN-3	-0.51714	4.6713e-09	4.49573e-08	DOWNinCases	1
EIF4H.5885.55	EIF4H	eIF-4H	Eukaryotic translation initiation factor 4H	-1.37645	4.67161e-09	4.49573e-08	DOWNinCases	0
IMPACT.20463.315	IMPACT	IMPCT	Protein IMPACT	-1.10639	4.70883e-09	4.52083e-08	DOWNinCases	0
TIPRL.23387.18	TIPRL	TIPRL	TIP41-like protein	-0.72716	4.71981e-09	4.52083e-08	DOWNinCases	0
ATP5PO.9202.309	ATP5PO	ATPO	ATP synthase subunit O, mitochondrial	-1.60013	4.7217e-09	4.52083e-08	DOWNinCases	0
KLF9.22488.17	KLF9	KLF9	Krueppel-like factor 9	-1.22692	4.72252e-09	4.52083e-08	DOWNinCases	0
CLEC1B.4332.6	CLEC1B	CLC1B	C-type lectin domain family 1 member B	-1.13979	4.73219e-09	4.52415e-08	DOWNinCases	0
CCDC92.23418.66	CCDC92	CCD92	Coiled-coil domain-containing protein 92	-1.0531	4.79478e-09	4.57792e-08	DOWNinCases	0
PPCS.17843.30	PPCS	PPCS	Phosphopantothenate--cysteine ligase	-1.18506	4.80101e-09	4.57792e-08	DOWNinCases	0
FIBP.19169.88	FIBP	FIBP	Acidic fibroblast growth factor intracellular-binding protein	-1.29696	4.89348e-09	4.66e-08	DOWNinCases	0
TMA16.22811.5	TMA16	TMA16	Translation machinery-associated protein 16	-0.374692	4.91727e-09	4.67654e-08	DOWNinCases	0
PIK3CA.PIK3R1.3390.72	PIK3CA	PIK3CA/PIK3R1	PIK3CA/PIK3R1	-0.783769	5.00428e-09	4.75309e-08	DOWNinCases	0
SMAD2.10364.6	SMAD2	SMAD2	Mothers against decapentaplegic homolog 2	-1.2986	5.09423e-09	4.83222e-08	DOWNinCases	0
ATP6V1C1.23663.28	ATP6V1C1	VATC1	Vacuolar ATP synthase subunit C 1	-1.3722	5.12375e-09	4.85391e-08	DOWNinCases	0
TNFRSF6B.5070.76	TNFRSF6B	DcR3	Tumor necrosis factor receptor superfamily member 6B	0.403363	5.17092e-09	4.89223e-08	UPinCases	0
ISLR2.8528.74	ISLR2	ISLR2	Immunoglobulin superfamily containing leucine-rich repeat protein 2	-0.58196	5.18095e-09	4.89536e-08	DOWNinCases	1
POLR2M.23398.1	POLR2M	GRL1A	DNA-directed RNA polymerase II subunit GRINL1A	-0.87019	5.19789e-09	4.905e-08	DOWNinCases	0
NTM.20550.38	NTM	NTRI	Neurotrimin	-0.65335	5.2895e-09	4.97694e-08	DOWNinCases	1
FKBP1B.11568.2	FKBP1B	FKB1B	Peptidyl-prolyl cis-trans isomerase FKBP1B	-1.33815	5.29211e-09	4.97694e-08	DOWNinCases	0
NTN1.6649.51	NTN1	NET1	Netrin-1	1.34838	5.29462e-09	4.97694e-08	UPinCases	0
ACOT13.17675.17	ACOT13	ACO13	Acyl-coenzyme A thioesterase 13	-1.62928	5.31137e-09	4.98625e-08	DOWNinCases	0
SHMT2.12691.44	SHMT2	GLYM	Serine hydroxymethyltransferase, mitochondrial	-1.44632	5.34827e-09	5.01443e-08	DOWNinCases	0
PGLYRP4.19821.10	PGLYRP4	PGRP-I-beta	Peptidoglycan recognition protein I-beta	0.329991	5.39816e-09	5.05471e-08	UPinCases	0
DOK1.16831.7	DOK1	DOK1	Docking protein 1	-0.986582	5.42901e-09	5.07706e-08	DOWNinCases	0
SH3BGRL2.19113.66	SH3BGRL2	SH3L2	SH3 domain-binding glutamic acid-rich-like protein 2	-1.66407	5.46724e-09	5.10626e-08	DOWNinCases	0
DENND10.23535.3	DENND10	FA45A	Protein FAM45A	-1.21268	5.49975e-09	5.13005e-08	DOWNinCases	0
PLPBP.20439.14	PLPBP	PROSC	Proline synthase co-transcribed bacterial homolog protein	-0.943327	5.54269e-09	5.16349e-08	DOWNinCases	0
CAT.3488.64	CAT	Catalase	Catalase	1.05881	5.59355e-09	5.20318e-08	UPinCases	1
PFKFB3.12456.5	PFKFB3	F263	6-phosphofructo-2-kinase/fructose-2,6-bisphosphatase 3	-0.43179	5.59958e-09	5.20318e-08	DOWNinCases	0
UBA6.25284.47	UBA6	UBA6	Ubiquitin-like modifier-activating enzyme 6	-1.31187	5.64124e-09	5.23522e-08	DOWNinCases	0
NECAB3.23374.42	NECAB3	NECA3	N-terminal EF-hand calcium-binding protein 3	-0.785404	5.68009e-09	5.26456e-08	DOWNinCases	0
FAM221B.25493.11	FAM221B	F221B	Protein FAM221B	-0.530997	5.69036e-09	5.26738e-08	DOWNinCases	0
PDLIM5.23703.8	PDLIM5	PDLI5	PDZ and LIM domain protein 5	-0.909791	5.72768e-09	5.2952e-08	DOWNinCases	0
CEBPA.18874.66	CEBPA	CEBPA	CCAAT/enhancer-binding protein alpha	0.374542	5.75982e-09	5.316e-08	UPinCases	0
TPM4.7660.21	TPM4	Tropomyosin 4	Tropomyosin alpha-4 chain	-1.55579	5.769e-09	5.316e-08	DOWNinCases	0
SMAD4.12022.12	SMAD4	SMAD4	Mothers against decapentaplegic homolog 4	-0.826747	5.77207e-09	5.316e-08	DOWNinCases	0
PDP1.22005.8	PDP1	PDP1	[Pyruvate dehydrogenase [acetyl-transferring]]-phosphatase 1, mitochondrial	-0.514172	5.79459e-09	5.33e-08	DOWNinCases	0
LGALS1.8046.9	LGALS1	Galectin-1	Galectin-1	-0.462015	5.83206e-09	5.3577e-08	DOWNinCases	0
MTSS2.25252.29	MTSS2	MTSSL	MTSS1-like protein	-1.29669	5.8476e-09	5.36521e-08	DOWNinCases	0
MAP4K5.21989.12	MAP4K5	M4K5	Mitogen-activated protein kinase kinase kinase kinase 5	-1.34464	5.94903e-09	5.44591e-08	DOWNinCases	0
ADAM15.9956.7	ADAM15	ADA15	Disintegrin and metalloproteinase domain-containing protein 15	0.367539	5.95051e-09	5.44591e-08	UPinCases	0
SH3BGRL3.17490.4	SH3BGRL3	SH3BGRL3-like protein	SH3 domain-binding glutamic acid-rich-like protein 3	-1.20421	5.9666e-09	5.45058e-08	DOWNinCases	0
ITIH1.7955.195	ITIH1	ITI heavy chain H1	Inter-alpha-trypsin inhibitor heavy chain H1	-0.393351	5.97057e-09	5.45058e-08	DOWNinCases	1
IGF1R.4232.19	IGF1R	IGF-I sR	Insulin-like growth factor 1 receptor	-0.658739	6.14965e-09	5.60703e-08	DOWNinCases	1
FLT1.16315.105	FLT1	VEGF sR1	Vascular endothelial growth factor receptor 1	0.440635	6.2061e-09	5.6478e-08	UPinCases	0
RPRD1B.19126.4	RPRD1B	C20orf77	Regulation of nuclear pre-mRNA domain-containing protein 1B	0.335857	6.20987e-09	5.6478e-08	UPinCases	0
NUMB.25248.28	NUMB	NUMB	Protein numb homolog	-1.16658	6.24598e-09	5.67356e-08	DOWNinCases	0
SMAD3.10363.13	SMAD3	SMAD3	Mothers against decapentaplegic homolog 3	-1.07004	6.27278e-09	5.69081e-08	DOWNinCases	0
TPO.3873.51	TPO	TMA	Thyroid peroxidase	0.401701	6.28927e-09	5.69159e-08	UPinCases	0
PEAR1.8892.14	PEAR1	PEAR1	Platelet endothelial aggregation receptor 1	-1.29699	6.40967e-09	5.79336e-08	DOWNinCases	0
BCAR3.5262.57	BCAR3	BCAR3	Breast cancer anti-estrogen resistance protein 3	0.348336	6.42414e-09	5.79924e-08	UPinCases	0
PRTN3.3514.49	PRTN3	Proteinase-3	Myeloblastin	1.13513	6.59498e-09	5.94609e-08	UPinCases	1
POGLUT1.6467.65	POGLUT1	KTEL1	Protein O-glucosyltransferase 1	-1.50064	6.62073e-09	5.96193e-08	DOWNinCases	0
ADH5.11369.23	ADH5	ADHX	Alcohol dehydrogenase class-3	-1.03696	6.70368e-09	6.02231e-08	DOWNinCases	0
USP8.13450.49	USP8	UBP8	Ubiquitin carboxyl-terminal hydrolase 8	-1.3653	6.88139e-09	6.17376e-08	DOWNinCases	0
GOLPH3.24721.17	GOLPH3	GOLP3	Golgi phosphoprotein 3	-0.750252	6.90152e-09	6.18421e-08	DOWNinCases	0
NME4.16809.1	NME4	NDKM	Nucleoside diphosphate kinase, mitochondrial	-1.44623	7.26399e-09	6.49302e-08	DOWNinCases	0
PMEL.6472.40	PMEL	GP100	Melanocyte protein PMEL	-0.788619	7.32641e-09	6.53691e-08	DOWNinCases	1
PTP4A2.11699.16	PTP4A2	TP4A2	Protein tyrosine phosphatase type IVA 2	-1.11055	7.33103e-09	6.53691e-08	DOWNinCases	0
RWDD1.21323.2	RWDD1	RWDD1	RWD domain-containing protein 1	-1.05532	7.43029e-09	6.61732e-08	DOWNinCases	0
TRUB1.23543.92	TRUB1	TRUB1	Probable tRNA pseudouridine synthase 1	-0.946609	7.5419e-09	6.70852e-08	DOWNinCases	0
SH3GL3.18318.98	SH3GL3	SH3G3	Endophilin-A3	-1.44688	7.58848e-09	6.74171e-08	DOWNinCases	0
GALNT9.22152.162	GALNT9	GALT9	Polypeptide N-acetylgalactosaminyltransferase 9	-0.42743	7.76537e-09	6.8801e-08	DOWNinCases	0
ISLR2.13124.20	ISLR2	ISLR2	Immunoglobulin superfamily containing leucine-rich repeat protein 2	-0.413925	7.77474e-09	6.8801e-08	DOWNinCases	0
STK4.22847.18	STK4	STK4	Serine/threonine-protein kinase 4	-1.03383	7.77803e-09	6.8801e-08	DOWNinCases	0
TK2.19114.8	TK2	KITM	Thymidine kinase 2, mitochondrial	-0.439699	7.78581e-09	6.8801e-08	DOWNinCases	0
ANXA7.18244.1	ANXA7	ANXA7	Annexin A7	-0.986897	7.79147e-09	6.8801e-08	DOWNinCases	0
GBP1.15326.64	GBP1	GBP1	Guanylate-binding protein 1	0.90444	7.86596e-09	6.93747e-08	UPinCases	1
SERPINB13.18841.1	SERPINB13	SPB13	Serpin B13	-0.896285	7.89921e-09	6.95837e-08	DOWNinCases	1
HOMER2.12685.57	HOMER2	HOME2	Homer protein homolog 2	-1.29876	8.22701e-09	7.23838e-08	DOWNinCases	1
CEACAM16.24299.1	CEACAM16	CEA16	Carcinoembryonic antigen-related cell adhesion molecule 16	0.339268	8.38096e-09	7.36494e-08	UPinCases	0
RHOT1.21752.10	RHOT1	MIRO1	Mitochondrial Rho GTPase 1	-1.47406	8.41593e-09	7.38675e-08	DOWNinCases	0
RTN4RL1.20546.71	RTN4RL1	R4RL1	Reticulon-4 receptor-like 1	-0.530244	8.45183e-09	7.40933e-08	DOWNinCases	0
LRRC59.19163.26	LRRC59	LRC59	Leucine-rich repeat-containing protein 59	-1.56596	8.61306e-09	7.53676e-08	DOWNinCases	0
CROT.13929.27	CROT	OCTC	Peroxisomal carnitine O-octanoyltransferase	-0.992779	8.62396e-09	7.53676e-08	DOWNinCases	0
NAGPA.11208.15	NAGPA	NAGPA	N-acetylglucosamine-1-phosphodiester alpha-N-acetylglucosaminidase	-0.546244	8.62822e-09	7.53676e-08	DOWNinCases	0
UNC13D.24942.22	UNC13D	UN13D	Protein unc-13 homolog D	-1.30143	8.71467e-09	7.59406e-08	DOWNinCases	0
KLK8.13708.56	KLK8	kallikrein 8	Kallikrein-8	-0.835105	8.7323e-09	7.60033e-08	DOWNinCases	1
EIF4A2.18824.7	EIF4A2	IF4A2	Eukaryotic initiation factor 4A-II	-1.0435	8.97674e-09	7.79447e-08	DOWNinCases	0
RAB3D.19379.154	RAB3D	RAB3D	Ras-related protein Rab-3D	-1.37577	9.20872e-09	7.98638e-08	DOWNinCases	0
CSNK1G2.17436.193	CSNK1G2	CSNK1G2	Casein kinase I isoform gamma-2	-1.01242	9.24237e-09	8.00602e-08	DOWNinCases	0
TOP1.2876.74	TOP1	Topoisomerase I	DNA topoisomerase 1	0.45878	9.41464e-09	8.1359e-08	UPinCases	0
HSD17B4.23643.22	HSD17B4	DHB4	Peroxisomal multifunctional enzyme type 2	-1.35613	9.47887e-09	8.1817e-08	DOWNinCases	0
FLJ44635.22813.5	FLJ44635	TPT1L	TPT1-like protein	-0.351881	9.49095e-09	8.18244e-08	DOWNinCases	0
NTM.10907.116	NTM	NTRI	Neurotrimin	-0.789875	9.51306e-09	8.1918e-08	DOWNinCases	1
SYT17.9110.2	SYT17	SYT17	Synaptotagmin-17	0.370341	9.59509e-09	8.25094e-08	UPinCases	0
DEF6.14090.23	DEF6	DEFI6	Differentially expressed in FDCP 6 homolog	-0.768594	9.60439e-09	8.25094e-08	DOWNinCases	0
VCPIP1.23187.9	VCPIP1	VCIP1	Deubiquitinating protein VCIP135	-0.922119	9.6494e-09	8.27984e-08	DOWNinCases	0
B4GALT6.10832.24	B4GALT6	B4GT6	Beta-1,4-galactosyltransferase 6	-0.559015	9.68135e-09	8.29748e-08	DOWNinCases	1
MAN1C1.13427.66	MAN1C1	MA1C1	Mannosyl-oligosaccharide 1,2-alpha-mannosidase IC	0.408275	9.77044e-09	8.364e-08	UPinCases	0
DUSP3.3480.7	DUSP3	DUS3	Dual specificity protein phosphatase 3	-0.927756	9.90942e-09	8.47302e-08	DOWNinCases	0
SUGT1.17818.22	SUGT1	SUGT1	Protein SGT1 homolog	-0.797981	1.005e-08	8.56833e-08	DOWNinCases	0
PUF60.10575.31	PUF60	PUF60	Poly(U)-binding-splicing factor PUF60	0.805509	1.00559e-08	8.56833e-08	UPinCases	1
B4GALT1.13381.49	B4GALT1	B4GT1	Beta-1,4-galactosyltransferase 1	0.596182	1.00562e-08	8.56833e-08	UPinCases	0
PA2G4.4258.15	PA2G4	PA2G4	Proliferation-associated protein 2G4	-0.919536	1.01025e-08	8.59777e-08	DOWNinCases	0
CFP.2960.66	CFP	Properdin	Properdin	-0.531669	1.0246e-08	8.70968e-08	DOWNinCases	1
USP12.WDR48.21751.6	USP12	USP12/WDR48 Complex	USP12/WDR48 Complex	-0.622144	1.02819e-08	8.72506e-08	DOWNinCases	0
MICALL1.24973.11	MICALL1	MILK1	MICAL-like protein 1	-0.547483	1.0367e-08	8.78182e-08	DOWNinCases	0
COL13A1.6570.1	COL13A1	CODA1	Collagen alpha-1(XIII) chain	-0.483592	1.04607e-08	8.85086e-08	DOWNinCases	0
MAP1LC3B.11608.5	MAP1LC3B	MLP3B	Microtubule-associated proteins 1A/1B light chain 3B	-0.775882	1.05105e-08	8.88273e-08	DOWNinCases	0
CCL7.4886.3	CCL7	MCP-3	C-C motif chemokine 7	0.555778	1.06659e-08	9.0036e-08	UPinCases	1
DMTN.23650.2	DMTN	Dematin	Dematin	-0.830878	1.06847e-08	9.00475e-08	DOWNinCases	0
MXRA8.10521.10	MXRA8	MXRA8	Matrix-remodeling-associated protein 8	-0.517305	1.0692e-08	9.00475e-08	DOWNinCases	0
SIGLEC12.10037.98	SIGLEC12	SIG12	Sialic acid-binding Ig-like lectin 12	0.405066	1.07323e-08	9.02823e-08	UPinCases	0
FUT10.7156.2	FUT10	FUT10	Alpha-(1,3)-fucosyltransferase 10	-0.588809	1.07889e-08	9.06298e-08	DOWNinCases	0
AFM.18196.8	AFM	Afamin	Afamin	-0.617157	1.07984e-08	9.06298e-08	DOWNinCases	1
SEPTIN1.23381.8	SEPTIN1	2022-09-01	Septin-1	-0.517047	1.09773e-08	9.20251e-08	DOWNinCases	0
BTD.15644.1	BTD	Biotinidase	Biotinidase	-0.389056	1.12687e-08	9.42507e-08	DOWNinCases	0
ABR.21958.4	ABR	ABR	Active breakpoint cluster region-related protein	-0.906793	1.18209e-08	9.8643e-08	DOWNinCases	0
TFAM.9952.57	TFAM	TFAM	Transcription factor A, mitochondrial	-1.56055	1.21041e-08	1.00775e-07	DOWNinCases	0
ARHGAP25.11333.82	ARHGAP25	RHG25	Rho GTPase-activating protein 25	-0.900345	1.21201e-08	1.00793e-07	DOWNinCases	0
TMEM38B.9509.4	TMEM38B	TM38B	Trimeric intracellular cation channel type B	-0.721293	1.21494e-08	1.00922e-07	DOWNinCases	0
AGFG1.11681.8	AGFG1	NUPL	Arf-GAP domain and FG repeat-containing protein 1	-1.08552	1.21812e-08	1.01071e-07	DOWNinCases	0
RILPL2.24655.23	RILPL2	RIPL2	RILP-like protein 2	-1.38131	1.23277e-08	1.02054e-07	DOWNinCases	0
EXOSC1.7930.3	EXOSC1	EXOS1	Exosome complex component CSL4	0.380058	1.25588e-08	1.03731e-07	UPinCases	0
LMNB1.3889.64	LMNB1	Lamin-B1	Lamin-B1	0.378231	1.2655e-08	1.04334e-07	UPinCases	0
NDUFB6.23287.109	NDUFB6	NDUB6	NADH dehydrogenase	-1.00275	1.26605e-08	1.04334e-07	DOWNinCases	1
PECAM1.2695.25	PECAM1	PECAM-1	Platelet endothelial cell adhesion molecule	0.489876	1.26896e-08	1.04456e-07	UPinCases	0
BDNF.2421.7	BDNF	BDNF	Brain-derived neurotrophic factor	0.604907	1.28737e-08	1.05852e-07	UPinCases	0
DCTN6.18311.44	DCTN6	DCTN6	Dynactin subunit 6	-0.851487	1.29966e-08	1.06622e-07	DOWNinCases	0
UFD1.17411.55	UFD1	UFD1	Ubiquitin recognition factor in ER-associated degradation protein 1	-1.36501	1.30555e-08	1.06985e-07	DOWNinCases	0
ALOX5.25880.14	ALOX5	5-Lipoxygenase	5-Lipoxygenase	0.473814	1.32996e-08	1.08862e-07	UPinCases	0
SCP2.25049.8	SCP2	NLTP	Nonspecific lipid-transfer protein	-1.1392	1.41013e-08	1.15295e-07	DOWNinCases	0
KLK4.2833.20	KLK4	Kallikrein 4	Kallikrein-4	0.357406	1.4128e-08	1.15384e-07	UPinCases	0
TRAPPC2.20402.11	TRAPPC2	TPC2A	Trafficking protein particle complex subunit 2	-1.23696	1.4369e-08	1.1722e-07	DOWNinCases	0
RBM4.23361.20	RBM4	RBM4	RNA-binding protein 4	-1.07625	1.45183e-08	1.18306e-07	DOWNinCases	0
AGFG2.23597.11	AGFG2	AGFG2	Arf-GAP domain and FG repeat-containing protein 2	-1.31248	1.46908e-08	1.19578e-07	DOWNinCases	0
NAE1.UBA3.21939.6	NAE1	ULA1/ UBA3	ULA1/ UBA3	-0.849806	1.49143e-08	1.21262e-07	DOWNinCases	0
ARPC2.23376.56	ARPC2	ARPC2	Actin-related protein 2/3 complex subunit 2	-1.28594	1.50145e-08	1.2194e-07	DOWNinCases	1
EIF4G2.4230.1	EIF4G2	IF4G2	Eukaryotic translation initiation factor 4 gamma 2	-1.55463	1.52077e-08	1.23372e-07	DOWNinCases	0
MESD.15299.102	MESD	MESD2	LDLR chaperone MESD	-1.07365	1.52588e-08	1.23649e-07	DOWNinCases	0
TBC1D13.21163.21	TBC1D13	TBC13	TBC1 domain family member 13	-1.20419	1.52996e-08	1.23842e-07	DOWNinCases	0
EIF1AY.19224.5	EIF1AY	IF1AY	Eukaryotic translation initiation factor 1A, Y-chromosomal	-0.793054	1.53666e-08	1.24246e-07	DOWNinCases	0
MAMDC2.6119.14	MAMDC2	MAMC2	MAM domain-containing protein 2	0.334893	1.5387e-08	1.24273e-07	UPinCases	0
LGALS3BP.5000.52	LGALS3BP	LG3BP	Galectin-3-binding protein	0.935143	1.58408e-08	1.27797e-07	UPinCases	1
ASCC2.24476.18	ASCC2	ASC-1 complex subunit p100	Activating signal cointegrator 1 complex subunit 2	-0.944795	1.59219e-08	1.28309e-07	DOWNinCases	0
LZTFL1.20378.110	LZTFL1	LZTL1	Leucine zipper transcription factor-like protein 1	-0.876833	1.59803e-08	1.28495e-07	DOWNinCases	0
PPP3CA.PPP3R1.4903.72	PPP3CA	Calcineurin	Calcineurin	-1.14467	1.608e-08	1.29154e-07	DOWNinCases	0
ENSA.17734.13	ENSA	a-endosulfine	Alpha-endosulfine	-1.32118	1.62495e-08	1.30372e-07	DOWNinCases	0
MCL1.9819.110	MCL1	Mcl-1	Induced myeloid leukemia cell differentiation protein Mcl-1	0.341105	1.62717e-08	1.30406e-07	UPinCases	0
UGP2.13939.14	UGP2	UGPA1	UTP--glucose-1-phosphate uridylyltransferase	0.991212	1.63303e-08	1.30732e-07	UPinCases	1
TARS1.18186.15	TARS1	SYTC	Threonine--tRNA ligase, cytoplasmic	-1.22302	1.65375e-08	1.32245e-07	DOWNinCases	0
ANXA4.17164.15	ANXA4	annexin IV	Annexin A4	-0.869209	1.67086e-08	1.33468e-07	DOWNinCases	0
CGREF1.6257.56	CGREF1	CGRE1	Cell growth regulator with EF hand domain protein 1	0.470213	1.73759e-08	1.38595e-07	UPinCases	0
GIPC1.22970.8	GIPC1	GIPC1	PDZ domain-containing protein GIPC1	-0.948178	1.75243e-08	1.39372e-07	DOWNinCases	0
MAP3K11.21406.25	MAP3K11	M3K11	Mitogen-activated protein kinase kinase kinase 11	-0.574946	1.77029e-08	1.4057e-07	DOWNinCases	1
ITIH2.9326.33	ITIH2	ITI heavy chain H2	Inter-alpha-trypsin inhibitor heavy chain H2	-0.460554	1.77136e-08	1.4057e-07	DOWNinCases	1
CEP41.23560.154	CEP41	CEP41	Centrosomal protein of 41 kDa	-1.66975	1.80496e-08	1.43081e-07	DOWNinCases	0
PIN1.15474.7	PIN1	PIN1	Peptidyl-prolyl cis-trans isomerase NIMA-interacting 1	-1.00303	1.82458e-08	1.44479e-07	DOWNinCases	0
KIFBP.12956.40	KIFBP	KBP	KIF1-binding protein	-1.64791	1.82679e-08	1.44497e-07	DOWNinCases	0
URM1.21653.205	URM1	URM1	Ubiquitin-related modifier 1	-0.682988	1.82906e-08	1.44519e-07	DOWNinCases	0
C1QTNF3.7251.64	C1QTNF3	C1QT3	Complement C1q tumor necrosis factor-related protein 3	-0.399941	1.84629e-08	1.45723e-07	DOWNinCases	0
ST6GALNAC1.7867.154	ST6GALNAC1	SIA7A	Alpha-N-acetylgalactosaminide alpha-2,6-sialyltransferase 1	0.370391	1.86183e-08	1.4679e-07	UPinCases	0
DNAJC11.9783.75	DNAJC11	DJC11	DnaJ homolog subfamily C member 11	0.338597	1.87926e-08	1.48005e-07	UPinCases	0
RPS6KA3.3469.74	RPS6KA3	RPS6KA3	Ribosomal protein S6 kinase alpha-3	-1.07707	1.89148e-08	1.48806e-07	DOWNinCases	0
RNASE10.5602.62	RNASE10	RNS10	Inactive ribonuclease-like protein 10	0.468645	1.89433e-08	1.48869e-07	UPinCases	0
MAGEA10.13610.9	MAGEA10	MAGE-10	Melanoma-associated antigen 10	-0.557385	1.92314e-08	1.50971e-07	DOWNinCases	0
ARRB1.12643.4	ARRB1	ARRB1	Beta-arrestin-1	-1.52131	1.9312e-08	1.5144e-07	DOWNinCases	0
BLVRB.17148.7	BLVRB	BLVRB	Flavin reductase (NADPH)	0.875679	1.95107e-08	1.52834e-07	UPinCases	0
TBC1D20.23687.27	TBC1D20	TBC20	TBC1 domain family member 20	-1.25825	1.96458e-08	1.53727e-07	DOWNinCases	0
PIP4K2B.18232.42	PIP4K2B	PI42B	Phosphatidylinositol 5-phosphate 4-kinase type-2 beta	-1.13671	2.00904e-08	1.57037e-07	DOWNinCases	0
AGA.10435.2	AGA	ASPG	N(4)-(beta-N-acetylglucosaminyl)-L-asparaginase	-0.361528	2.02394e-08	1.58032e-07	DOWNinCases	0
LEFTY2.15503.15	LEFTY2	Lefty-A	Left-right determination factor 2	-0.783373	2.03436e-08	1.58676e-07	DOWNinCases	0
AKT1S1.23302.19	AKT1S1	AKTS1	Proline-rich AKT1 substrate 1	-1.07159	2.09522e-08	1.63248e-07	DOWNinCases	0
CHST6.4429.51	CHST6	CHST6	Carbohydrate sulfotransferase 6	0.472068	2.12774e-08	1.65604e-07	UPinCases	0
CST7.14038.130	CST7	CYTF	Cystatin-F	1.20369	2.15368e-08	1.67445e-07	UPinCases	0
MICU2.6226.69	MICU2	EFHA1	Calcium uptake protein 2, mitochondrial	-1.13373	2.16995e-08	1.68277e-07	DOWNinCases	0
PIP4K2A.12697.30	PIP4K2A	PI42A	Phosphatidylinositol 5-phosphate 4-kinase type-2 alpha	-1.31514	2.17132e-08	1.68277e-07	DOWNinCases	0
BLOC1S1.23246.67	BLOC1S1	BL1S1	Biogenesis of lysosome-related organelles complex 1 subunit 1	-0.715748	2.18836e-08	1.69418e-07	DOWNinCases	0
C9.3060.43	C9	C9	Complement component C9	0.351854	2.19291e-08	1.6959e-07	UPinCases	1
PLA2R1.10916.44	PLA2R1	PLA2R	Secretory phospholipase A2 receptor	-0.841768	2.21831e-08	1.71372e-07	DOWNinCases	1
ARHGAP5.14748.31	ARHGAP5	RHG05	Rho GTPase-activating protein 5	-1.13379	2.22424e-08	1.71648e-07	DOWNinCases	0
ACADM.17333.20	ACADM	ACADM	Medium-chain specific acyl-CoA dehydrogenase, mitochondrial	-1.82683	2.26178e-08	1.74361e-07	DOWNinCases	0
PSMD6.23672.10	PSMD6	PSMD6	26S proteasome non-ATPase regulatory subunit 6	-0.727278	2.2895e-08	1.76311e-07	DOWNinCases	1
ACHE.10980.11	ACHE	ACES	Acetylcholinesterase	-0.684997	2.32135e-08	1.78575e-07	DOWNinCases	0
SYF2.19438.68	SYF2	SYF2	Pre-mRNA-splicing factor SYF2	-0.781079	2.33335e-08	1.79308e-07	DOWNinCases	0
CPA4.9267.2	CPA4	CBPA4	Carboxypeptidase A4	-1.55884	2.35412e-08	1.80524e-07	DOWNinCases	1
RAB3A.17516.7	RAB3A	Rab3A	Ras-related protein Rab-3A	-0.383674	2.35664e-08	1.80527e-07	DOWNinCases	0
RABEP1.24417.22	RABEP1	RABE1	Rab GTPase-binding effector protein 1	-1.10413	2.36364e-08	1.80873e-07	DOWNinCases	0
IDH3G.19275.68	IDH3G	IDH3G	Isocitrate dehydrogenase [NAD] subunit gamma, mitochondrial	-1.16455	2.43369e-08	1.86038e-07	DOWNinCases	0
PLCG2.10070.22	PLCG2	PLCG2	1-phosphatidylinositol 4,5-bisphosphate phosphodiesterase gamma-2	-0.84969	2.4654e-08	1.88265e-07	DOWNinCases	0
C1QTNF1.6304.8	C1QTNF1	C1QT1	Complement C1q tumor necrosis factor-related protein 1	0.481401	2.50634e-08	1.91191e-07	UPinCases	0
BLOC1S3.24487.95	BLOC1S3	BL1S3	Biogenesis of lysosome-related organelles complex 1 subunit 3	0.478337	2.52092e-08	1.92101e-07	UPinCases	0
ASMTL.10089.7	ASMTL	ASML	N-acetylserotonin O-methyltransferase-like protein	-0.712797	2.53088e-08	1.92659e-07	DOWNinCases	1
TLN2.14082.56	TLN2	TLN2	Talin-2	-0.767108	2.54443e-08	1.93488e-07	DOWNinCases	0
IL22RA2.5087.5	IL22RA2	IL-22BP	Interleukin-22 receptor subunit alpha-2	-0.400249	2.6257e-08	1.9946e-07	DOWNinCases	1
PRTN3.13720.95	PRTN3	Proteinase-3	Myeloblastin	0.800903	2.70182e-08	2.04815e-07	UPinCases	1
AFM.4763.31	AFM	Afamin	Afamin	-0.62541	2.76864e-08	2.09663e-07	DOWNinCases	1
ANXA7.14203.3	ANXA7	ANXA7	Annexin A7	-0.985119	2.80511e-08	2.12204e-07	DOWNinCases	0
CA9.3798.71	CA9	Carbonic anhydrase 9	Carbonic anhydrase 9	0.442471	2.89858e-08	2.18673e-07	UPinCases	0
HAMP.3504.58	HAMP	LEAP-1	Hepcidin	1.48266	2.89963e-08	2.18673e-07	UPinCases	1
WDR48.21743.1	WDR48	WDR48	WD repeat-containing protein 48	-1.05806	2.93327e-08	2.20981e-07	DOWNinCases	0
MYCT1.13541.1	MYCT1	MYCT1	Myc target protein 1	0.342483	2.9561e-08	2.22471e-07	UPinCases	0
IRAG1.8255.34	IRAG1	MRVI1	Protein MRVI1	-1.32055	2.96558e-08	2.22954e-07	DOWNinCases	0
MBD4.3891.56	MBD4	MBD4	Methyl-CpG-binding domain protein 4	0.506163	2.97839e-08	2.23687e-07	UPinCases	0
PDE11A.5252.33	PDE11A	PDE11	Dual 3',5'-cyclic-AMP and -GMP phosphodiesterase 11A	-1.13188	3.04221e-08	2.28244e-07	DOWNinCases	0
CIB1.20423.40	CIB1	CIB1	Calcium and integrin-binding protein 1	-0.582215	3.08665e-08	2.3134e-07	DOWNinCases	0
KCTD10.23337.54	KCTD10	BACD3	BTB/POZ domain-containing adapter for CUL3-mediated RhoA degradation protein 3	-0.850079	3.09391e-08	2.31445e-07	DOWNinCases	0
PPP1R14A.19117.3	PPP1R14A	PP14A	Protein phosphatase 1 regulatory subunit 14A	-1.4622	3.09529e-08	2.31445e-07	DOWNinCases	0
SRC.15433.4	SRC	p60-Src	Proto-oncogene tyrosine-protein kinase Src	-1.73285	3.09758e-08	2.31445e-07	DOWNinCases	0
DNAJC16.10454.99	DNAJC16	DJC16	DnaJ homolog subfamily C member 16	-1.21529	3.10375e-08	2.31668e-07	DOWNinCases	0
CCM2.12347.29	CCM2	CCM2	Cerebral cavernous malformations 2 protein	-0.53327	3.1595e-08	2.35588e-07	DOWNinCases	0
ALDH6A1.19136.22	ALDH6A1	MMSA	Methylmalonate-semialdehyde dehydrogenase [acylating], mitochondrial	-1.47593	3.19597e-08	2.38064e-07	DOWNinCases	0
EIF4A2.22984.10	EIF4A2	IF4A2	Eukaryotic initiation factor 4A-II	-0.862539	3.24356e-08	2.41115e-07	DOWNinCases	0
TIMM10.25215.1	TIMM10	TIM10	Mitochondrial import inner membrane translocase subunit Tim10	-0.930843	3.26087e-08	2.42156e-07	DOWNinCases	0
NEDD8.21445.40	NEDD8	Neddylin	Ubiquitin-like protein Nedd8	-0.839462	3.32601e-08	2.46521e-07	DOWNinCases	0
LRIG1.18831.6	LRIG1	LRIG1	Leucine-rich repeats and immunoglobulin-like domains protein 1	0.641233	3.33629e-08	2.47001e-07	UPinCases	1
DYNC1LI2.25053.1	DYNC1LI2	DC1L2	Cytoplasmic dynein 1 light intermediate chain 2	-0.915405	3.35663e-08	2.48254e-07	DOWNinCases	0
SEMA6D.20530.2	SEMA6D	SEM6D	Semaphorin-6D	-0.479399	3.38742e-08	2.50277e-07	DOWNinCases	0
IFI16.13940.19	IFI16	IP16	Gamma-interferon-inducible protein 16	0.841816	3.45999e-08	2.54607e-07	UPinCases	1
CPD.7917.17	CPD	CBPD	Carboxypeptidase D	0.376236	3.50327e-08	2.57531e-07	UPinCases	0
CD209.22576.2	CD209	DC-SIGN	CD209 antigen	-0.502376	3.51023e-08	2.57782e-07	DOWNinCases	0
CCNA2.15574.37	CCNA2	Cyclin A	Cyclin-A2	0.435044	3.55372e-08	2.60713e-07	UPinCases	0
FCRL4.8973.23	FCRL4	FCRL4	Fc receptor-like protein 4	-0.703596	3.63017e-08	2.66054e-07	DOWNinCases	1
HNRNPDL.10852.114	HNRNPDL	HNRDL	Heterogeneous nuclear ribonucleoprotein D-like	-0.838524	3.63599e-08	2.66213e-07	DOWNinCases	0
BRD2.15372.43	BRD2	BRD2	Bromodomain-containing protein 2	0.377577	3.65644e-08	2.67442e-07	UPinCases	0
FLII.12677.164	FLII	FLII	Protein flightless-1 homolog	-0.803504	3.72311e-08	2.72045e-07	DOWNinCases	0
VCP.25033.194	VCP	TER ATPase	Transitional endoplasmic reticulum ATPase	-1.15377	3.74629e-08	2.73464e-07	DOWNinCases	0
C1QTNF4.25964.12	C1QTNF4	C1QT4	Complement C1q tumor necrosis factor-related protein 4	-0.693092	3.79482e-08	2.76729e-07	DOWNinCases	1
AIDA.17347.80	AIDA	CA080	Axin interactor, dorsalization-associated protein	-0.782832	3.81708e-08	2.78075e-07	DOWNinCases	0
EIF2A.25105.87	EIF2A	EIF2A	Eukaryotic translation initiation factor 2A	-1.22955	3.87861e-08	2.82274e-07	DOWNinCases	0
SAMD4B.23606.18	SAMD4B	SAM4B	Sterile alpha motif domain-containing protein 4B	-0.977384	4.01953e-08	2.92238e-07	DOWNinCases	0
ZNF329.12803.9	ZNF329	ZN329	Zinc finger protein 329	0.39252	4.05526e-08	2.94324e-07	UPinCases	0
NMT1.12448.246	NMT1	NMT1	Glycylpeptide N-tetradecanoyltransferase 1	-1.20663	4.0563e-08	2.94324e-07	DOWNinCases	0
COX19.23575.58	COX19	COX19	Cytochrome c oxidase assembly protein COX19	-1.25574	4.07404e-08	2.95317e-07	DOWNinCases	0
TNFRSF13B.2704.74	TNFRSF13B	TACI	Tumor necrosis factor receptor superfamily member 13B	0.385534	4.10355e-08	2.97161e-07	UPinCases	0
EIF2S2.24723.58	EIF2S2	eIF-2-beta	Eukaryotic translation initiation factor 2 subunit 2	-1.25655	4.15651e-08	3.00399e-07	DOWNinCases	0
PMF1.23306.37	PMF1	PMF1	Polyamine-modulated factor 1	-0.419361	4.16101e-08	3.00426e-07	DOWNinCases	0
NT5M.17856.23	NT5M	NT5M	5'(3')-deoxyribonucleotidase, mitochondrial	-1.25923	4.20411e-08	3.03237e-07	DOWNinCases	0
RAB13.19282.3	RAB13	RAB13	Ras-related protein Rab-13	-0.959233	4.25117e-08	3.06328e-07	DOWNinCases	0
SULT1A3.13944.3	SULT1A3	SULT 1A3	Sulfotransferase 1A3	-1.76604	4.30517e-08	3.09826e-07	DOWNinCases	0
UFM1.3836.51	UFM1	UFM1	Ubiquitin-fold modifier 1	-0.857333	4.31059e-08	3.09826e-07	DOWNinCases	0
TEF.20990.48	TEF	TEF	Thyrotroph embryonic factor	0.32494	4.31246e-08	3.09826e-07	UPinCases	0
H110.12709.63	H1-10	H1X	Histone H1x	0.844691	4.3315e-08	3.10887e-07	UPinCases	0
DNAJA2.11582.63	DNAJA2	DNJA2	DnaJ homolog subfamily A member 2	-0.599836	4.33594e-08	3.10899e-07	DOWNinCases	1
GGA3.11683.19	GGA3	GGA3	ADP-ribosylation factor-binding protein GGA3	-1.34555	4.35891e-08	3.12238e-07	DOWNinCases	0
KLK13.11152.46	KLK13	kallikrein 13	Kallikrein-13	-0.989056	4.48042e-08	3.19685e-07	DOWNinCases	1
SPATC1L.23245.5	SPATC1L	SPC1L	Speriolin-like protein	-0.389128	4.52376e-08	3.22462e-07	DOWNinCases	0
ROR1.8474.6	ROR1	ROR1	Inactive tyrosine-protein kinase transmembrane receptor ROR1	-0.964873	4.56769e-08	3.25275e-07	DOWNinCases	1
BTK.3416.2	BTK	BTK	Tyrosine-protein kinase BTK	-1.73972	4.62198e-08	3.28819e-07	DOWNinCases	0
GSK3B.3236.12	GSK3B	GSK-3 beta	Glycogen synthase kinase-3 beta	-1.41469	4.67105e-08	3.31986e-07	DOWNinCases	0
STX4.10668.5	STX4	STX4	Syntaxin-4	-0.87385	4.72176e-08	3.34937e-07	DOWNinCases	0
N6AMT1.11096.57	N6AMT1	HEMK2	HemK methyltransferase family member 2	-0.770653	4.72854e-08	3.35091e-07	DOWNinCases	1
PAK4.13719.19	PAK4	PAK4	Serine/threonine-protein kinase PAK 4	-1.19759	4.764e-08	3.37276e-07	DOWNinCases	0
UBA1.21760.22	UBA1	UBE1	Ubiquitin-activating enzyme E1	-1.02149	4.82439e-08	3.4122e-07	DOWNinCases	0
PAK6.3827.22	PAK6	PAK6	Serine/threonine-protein kinase PAK 6	-1.78322	4.84655e-08	3.42455e-07	DOWNinCases	0
LRIG3.3322.52	LRIG3	LRIG3	Leucine-rich repeats and immunoglobulin-like domains protein 3	-0.494755	4.89609e-08	3.45295e-07	DOWNinCases	1
TRADD.13507.51	TRADD	TRADD	Tumor necrosis factor receptor type 1-associated DEATH domain protein	-0.392417	4.89622e-08	3.45295e-07	DOWNinCases	1
CTNNA1.24426.15	CTNNA1	CTNA1	Catenin alpha-1	-0.882362	4.92074e-08	3.46688e-07	DOWNinCases	0
FGFR1.5532.53	FGFR1	bFGF-R	Fibroblast growth factor receptor 1	-0.433823	4.96992e-08	3.49815e-07	DOWNinCases	0
UBE2D4.13475.10	UBE2D4	UB2D4	Ubiquitin-conjugating enzyme E2 D4	-0.693776	5.05108e-08	3.54842e-07	DOWNinCases	0
RNF31.23183.6	RNF31	RNF31	E3 ubiquitin-protein ligase RNF31	-1.09508	5.09553e-08	3.57276e-07	DOWNinCases	0
FBLN7.21891.31	FBLN7	FBLN7	Fibulin-7	-0.627593	5.1624e-08	3.61616e-07	DOWNinCases	1
UBE2I.2877.3	UBE2I	UBC9	SUMO-conjugating enzyme UBC9	-0.67074	5.21451e-08	3.64915e-07	DOWNinCases	0
FRZB.13740.51	FRZB	sFRP-3	Secreted frizzled-related protein 3	1.23222	5.22597e-08	3.65367e-07	UPinCases	0
EDDM3A.9536.16	EDDM3A	EP3A	Epididymal secretory protein E3-alpha	-0.514366	5.28788e-08	3.69341e-07	DOWNinCases	0
IST1.12434.25	IST1	K0174	IST1 homolog	-0.919529	5.29908e-08	3.69768e-07	DOWNinCases	0
BMP4.6326.20	BMP4	BMP-4	Bone morphogenetic protein 4	0.481301	5.39779e-08	3.76218e-07	UPinCases	0
ELL2.11494.4	ELL2	ELL2	RNA polymerase II elongation factor ELL2	-0.481696	5.40184e-08	3.76218e-07	DOWNinCases	0
APRT.10088.37	APRT	APT	Adenine phosphoribosyltransferase	-1.74395	5.43954e-08	3.78482e-07	DOWNinCases	0
FLT4.16035.8	FLT4	VEGF sR3	Vascular endothelial growth factor receptor 3	-0.565428	5.47858e-08	3.80478e-07	DOWNinCases	1
RABL3.23312.16	RABL3	RABL3	Rab-like protein 3	-1.11767	5.52638e-08	3.83426e-07	DOWNinCases	0
NAA50.20943.14	NAA50	NAA50	N-alpha-acetyltransferase 50	-1.07015	5.56565e-08	3.85783e-07	DOWNinCases	0
MAD2L1BP.21129.95	MAD2L1BP	MD2BP	MAD2L1-binding protein	-0.625277	5.60984e-08	3.88476e-07	DOWNinCases	0
CHST15.14097.86	CHST15	ST4S6	Carbohydrate sulfotransferase 15	0.588988	5.73674e-08	3.96886e-07	UPinCases	0
STXBP6.18308.30	STXBP6	STXB6	Syntaxin-binding protein 6	-0.495647	5.82406e-08	4.02546e-07	DOWNinCases	0
CUL4B.13743.56	CUL4B	CUL4B	Cullin-4B	-0.583043	5.91433e-08	4.0801e-07	DOWNinCases	0
PIN4.12718.43	PIN4	PIN4	Peptidyl-prolyl cis-trans isomerase NIMA-interacting 4	-1.09232	6.02103e-08	4.14978e-07	DOWNinCases	0
EHD3.25232.4	EHD3	EHD3	EH domain-containing protein 3	-1.20401	6.21101e-08	4.2686e-07	DOWNinCases	0
APOA1.2750.3	APOA1	Apo A-I	Apolipoprotein A-I	-0.64954	6.25281e-08	4.29328e-07	DOWNinCases	1
KLRC3.11571.75	KLRC3	NKG2E	NKG2-E type II integral membrane protein	-0.557391	6.28802e-08	4.31339e-07	DOWNinCases	0
MRPL12.23278.13	MRPL12	39S ribosomal protein L12	39S ribosomal protein L12, mitochondrial	-1.17895	6.30223e-08	4.31908e-07	DOWNinCases	0
SNRPA1.21321.2	SNRPA1	RU2A	U2 small nuclear ribonucleoprotein AAE	0.322617	6.39427e-08	4.37803e-07	UPinCases	0
SAR1A.17726.3	SAR1A	SAR1A	GTP-binding protein SAR1a	-1.93544	6.43594e-08	4.40242e-07	DOWNinCases	0
RAC1.2870.29	RAC1	RAC1	Ras-related C3 botulinum toxin substrate 1	-1.22015	6.52565e-08	4.4596e-07	DOWNinCases	0
DRG1.17849.6	DRG1	DRG1	Developmentally-regulated GTP-binding protein 1	-1.31622	6.60499e-08	4.50959e-07	DOWNinCases	0
TIA1.21885.196	TIA1	TIA1	Nucleolysin TIA-1 isoform p40	-1.38408	6.69907e-08	4.56527e-07	DOWNinCases	0
SNUPN.17765.3	SNUPN	SPN1	Snurportin-1	-1.20241	6.70665e-08	4.56617e-07	DOWNinCases	0
GHR.2948.58	GHR	Growth hormone receptor	Growth hormone receptor	-0.534974	6.72809e-08	4.57648e-07	DOWNinCases	1
SUB1.19236.24	SUB1	TCP4	Activated RNA polymerase II transcriptional coactivator p15	0.928622	6.79066e-08	4.61043e-07	UPinCases	1
NKD2.22514.12	NKD2	NKD2	Protein naked cuticle homolog 2	-0.326074	6.82545e-08	4.62974e-07	DOWNinCases	0
VTA1.4209.60	VTA1	DRG-1	Vacuolar protein sorting-associated protein VTA1 homolog	-1.13741	6.88325e-08	4.6646e-07	DOWNinCases	0
ASPN.6451.64	ASPN	ASPN	Asporin	-0.479391	6.89576e-08	4.66874e-07	DOWNinCases	0
BICD1.25118.45	BICD1	BICD1	Protein bicaudal D homolog 1	-0.445424	6.96494e-08	4.7112e-07	DOWNinCases	0
PSMD11.13572.43	PSMD11	PSD11	26S proteasome non-ATPase regulatory subunit 11	-0.911396	7.15821e-08	4.83744e-07	DOWNinCases	0
HNRNPK.19333.4	HNRNPK	hnRNP K	Heterogeneous nuclear ribonucleoprotein K	-0.816728	7.1964e-08	4.85874e-07	DOWNinCases	0
MLEC.6285.71	MLEC	K0152	Malectin	-1.01279	7.21453e-08	4.86647e-07	DOWNinCases	0
NME7.23521.29	NME7	NDK7	Nucleoside diphosphate kinase 7	-1.33471	7.4024e-08	4.98396e-07	DOWNinCases	0
GSTK1.13474.40	GSTK1	GSTK1	Glutathione S-transferase kappa 1	-1.29127	7.45062e-08	5.00579e-07	DOWNinCases	0
MAPRE1.12469.19	MAPRE1	MARE1	Microtubule-associated protein RP/EB family member 1	-1.24586	7.59127e-08	5.08762e-07	DOWNinCases	0
PMVK.12450.42	PMVK	PMVK	Phosphomevalonate kinase	-0.933266	7.61514e-08	5.09414e-07	DOWNinCases	0
PREP.14273.19	PREP	PPCE	Prolyl endopeptidase	-0.95992	7.6201e-08	5.09414e-07	DOWNinCases	0
GPN1.16599.38	GPN1	GPN1	GPN-loop GTPase 1	-0.900331	7.62197e-08	5.09414e-07	DOWNinCases	0
GBA3.21592.8	GBA3	GBA3	Cytosolic beta-glucosidase	0.36209	7.63123e-08	5.09565e-07	UPinCases	0
PPP2R1A.12621.55	PPP2R1A	PP2AAA	Serine/threonine-protein phosphatase 2A 65 kDa regulatory subunit A alpha isoform	-0.853365	7.69835e-08	5.13106e-07	DOWNinCases	0
ATP1B1.13392.13	ATP1B1	AT1B1	Sodium/potassium-transporting ATPase subunit beta-1	-0.558801	7.71337e-08	5.13637e-07	DOWNinCases	0
TMEM132D.13416.8	TMEM132D	T132D	Transmembrane protein 132D	-0.630729	7.80611e-08	5.18864e-07	DOWNinCases	1
ABHD5.23393.56	ABHD5	ABHD5	1-acylglycerol-3-phosphate O-acyltransferase ABHD5	-1.08903	7.9588e-08	5.28531e-07	DOWNinCases	0
ESM1.3805.16	ESM1	Endocan	Endothelial cell-specific molecule 1	0.904035	7.98649e-08	5.29887e-07	UPinCases	1
SAMM50.22772.125	SAMM50	SAM50	Sorting and assembly machinery component 50 homolog	-0.372316	8.12752e-08	5.38753e-07	DOWNinCases	0
TGM2.18934.50	TGM2	Tissue transglutaminase	Protein-glutamine gamma-glutamyltransferase 2	0.897439	8.1903e-08	5.42421e-07	UPinCases	0
HMGA2.19516.10	HMGA2	HMGA2	High mobility group protein HMGI-C	0.438929	8.29172e-08	5.48512e-07	UPinCases	0
FEV.12740.55	FEV	FEV	Protein FEV	-0.649424	8.29733e-08	5.48512e-07	DOWNinCases	0
VPS4A.11476.43	VPS4A	VPS4A	Vacuolar protein sorting-associated protein 4A	-0.89706	8.43594e-08	5.5717e-07	DOWNinCases	0
EEF1E1.21628.6	EEF1E1	MCA3	Eukaryotic translation elongation factor 1 epsilon-1	-0.670366	8.53961e-08	5.62996e-07	DOWNinCases	0
MNDA.20076.7	MNDA	MNDA	Myeloid cell nuclear differentiation antigen	0.970721	8.70138e-08	5.72625e-07	UPinCases	0
AMIGO2.6914.15	AMIGO2	AMGO2	Amphoterin-induced protein 2	-0.461712	8.75441e-08	5.75128e-07	DOWNinCases	0
ELK4.22128.8	ELK4	ELK4	ETS domain-containing protein Elk-4	-0.375376	8.75522e-08	5.75128e-07	DOWNinCases	0
TAGLN2.9201.13	TAGLN2	Transgelin-2	Transgelin-2	-1.13195	8.87379e-08	5.81868e-07	DOWNinCases	0
ANGPTL1.11142.11	ANGPTL1	ANGL1	Angiopoietin-related protein 1	0.619752	8.90445e-08	5.83353e-07	UPinCases	1
CHKB.7761.125	CHKB	CHKB	Choline/ethanolamine kinase	-0.98789	8.92109e-08	5.83466e-07	DOWNinCases	1
TTC1.9864.38	TTC1	TTC1	Tetratricopeptide repeat protein 1	-1.35328	8.92218e-08	5.83466e-07	DOWNinCases	0
SETMAR.12462.20	SETMAR	SETMR	Histone-lysine N-methyltransferase SETMAR	0.34892	9.01273e-08	5.88859e-07	UPinCases	0
TXNL4B.15316.262	TXNL4B	TXN4B	Thioredoxin-like protein 4B	-1.43803	9.07541e-08	5.92422e-07	DOWNinCases	0
SH3GL2.20139.57	SH3GL2	SH3G2	Endophilin-A1	-1.41342	9.10913e-08	5.94091e-07	DOWNinCases	0
EPN1.24255.38	EPN1	EPN1	Epsin-1	-0.921688	9.25831e-08	6.03281e-07	DOWNinCases	0
POU2AF1.21839.3	POU2AF1	OBF1	POU domain class 2-associating factor 1	-0.945807	9.41069e-08	6.12374e-07	DOWNinCases	0
UBE2Q2.21717.44	UBE2Q2	UB2Q2	Ubiquitin-conjugating enzyme E2 Q2	-0.876477	9.42208e-08	6.12374e-07	DOWNinCases	0
AHSP.9025.5	AHSP	AHSP	Alpha-hemoglobin-stabilizing protein	-0.364843	9.42308e-08	6.12374e-07	DOWNinCases	0
RALB.18432.32	RALB	RALB	Ras-related protein Ral-B	-1.09392	9.48918e-08	6.1612e-07	DOWNinCases	0
SMPDL3A.4771.10	SMPDL3A	ASM3A	Acid sphingomyelinase-like phosphodiesterase 3a	0.468779	9.51645e-08	6.17341e-07	UPinCases	0
HSPA1A.14237.1	HSPA1A	HSP 70	Heat shock 70 kDa protein 1A	-0.509714	9.7547e-08	6.32233e-07	DOWNinCases	1
MKNK1.23693.4	MKNK1	MKNK1	MAP kinase-interacting serine/threonine-protein kinase 1	-0.988858	9.78559e-08	6.33671e-07	DOWNinCases	0
MGAT4B.7141.21	MGAT4B	MGT4B	Alpha-1,3-mannosyl-glycoprotein 4-beta-N-acetylglucosaminyltransferase B	-0.483204	9.80907e-08	6.34628e-07	DOWNinCases	1
BCL2L1.4423.77	BCL2L1	BCL2-like 1 protein	Bcl-2-like protein 1	-0.586894	9.9376e-08	6.42373e-07	DOWNinCases	0
MTIF3.7852.9	MTIF3	IF3M	Translation initiation factor IF-3, mitochondrial	-1.74995	9.96075e-08	6.43298e-07	DOWNinCases	0
CCT5.12569.25	CCT5	TCP-1-epsilon	T-complex protein 1 subunit epsilon	-1.1214	1.01779e-07	6.55746e-07	DOWNinCases	0
ARL3.12571.14	ARL3	ARL3	ADP-ribosylation factor-like protein 3	-1.0263	1.01805e-07	6.55746e-07	DOWNinCases	0
SETBP1.24471.2	SETBP1	SETBP	SET-binding protein	0.416233	1.01922e-07	6.55917e-07	UPinCases	0
UBL7.23366.15	UBL7	UBL7	Ubiquitin-like protein 7	-1.03857	1.03051e-07	6.62601e-07	DOWNinCases	0
ANOS1.6603.18	ANOS1	KALM	Anosmin-1	-0.392102	1.03277e-07	6.62886e-07	DOWNinCases	0
ITIH5.8233.2	ITIH5	ITIH5	Inter-alpha-trypsin inhibitor heavy chain H5	-0.526131	1.04337e-07	6.69096e-07	DOWNinCases	0
LECT2.16763.11	LECT2	LECT2	Leukocyte cell-derived chemotaxin-2	-1.12984	1.04544e-07	6.69837e-07	DOWNinCases	0
PPM1A.12619.14	PPM1A	Protein phophatase 2Ca	Protein phosphatase 1A	-0.668471	1.05012e-07	6.72245e-07	DOWNinCases	0
RAB32.17778.19	RAB32	RAB32	Ras-related protein Rab-32	-1.90254	1.05388e-07	6.73007e-07	DOWNinCases	0
AIMP1.2714.78	AIMP1	EMAP-2	Endothelial monocyte-activating polypeptide 2	-0.384947	1.05408e-07	6.73007e-07	DOWNinCases	1
CNOT9.8975.26	CNOT9	RCD1	Cell differentiation protein RCD1 homolog	-0.896046	1.05939e-07	6.758e-07	DOWNinCases	0
NANOG.2732.58	NANOG	NANOG	Homeobox protein NANOG	0.404825	1.06519e-07	6.78871e-07	UPinCases	0
DUSP16.14631.22	DUSP16	DUS16	Dual specificity protein phosphatase 16	-0.343012	1.06607e-07	6.78871e-07	DOWNinCases	0
NSDHL.8038.41	NSDHL	NSDHL	Sterol-4-alpha-carboxylate 3-dehydrogenase, decarboxylating	-0.51918	1.07136e-07	6.81649e-07	DOWNinCases	0
SLC30A5.9594.30	SLC30A5	ZNT5	Zinc transporter 5	-0.905069	1.0967e-07	6.95945e-07	DOWNinCases	0
PNKP.13657.2	PNKP	PNKP	Bifunctional polynucleotide phosphatase/kinase	-0.933803	1.1039e-07	6.99905e-07	DOWNinCases	0
C11orf68.8307.47	C11orf68	CK068	UPF0696 protein C11orf68	-1.06475	1.10882e-07	7.02416e-07	DOWNinCases	0
PLA2G7.5015.15	PLA2G7	PAFAH	Platelet-activating factor acetylhydrolase	-0.533455	1.16222e-07	7.35602e-07	DOWNinCases	1
CXCL2.3148.49	CXCL2	Gro-b	Gro-beta	-1.00726	1.16365e-07	7.35866e-07	DOWNinCases	0
WDR5.17760.128	WDR5	WDR5	WD repeat-containing protein 5	0.443048	1.17286e-07	7.41046e-07	UPinCases	1
SETD3.24260.4	SETD3	SETD3	Histone-lysine N-methyltransferase setd3	-1.22202	1.18787e-07	7.47592e-07	DOWNinCases	0
AIF1.2849.49	AIF1	AIF1	Allograft inflammatory factor 1	-0.529759	1.18835e-07	7.47592e-07	DOWNinCases	0
GALNT14.21767.129	GALNT14	GLT14	Polypeptide N-acetylgalactosaminyltransferase 14	-0.594714	1.2171e-07	7.65018e-07	DOWNinCases	0
GNAI1.19271.64	GNAI1	GNAI1	Guanine nucleotide-binding protein G(i) subunit alpha-1	-0.464425	1.22528e-07	7.69496e-07	DOWNinCases	0
TIMM8A.19148.58	TIMM8A	TIM8A	Mitochondrial import inner membrane translocase subunit Tim8 A	-0.880668	1.24913e-07	7.83125e-07	DOWNinCases	1
ACBD6.19341.36	ACBD6	ACBD6	Acyl-CoA-binding domain-containing protein 6	-0.469724	1.25087e-07	7.83542e-07	DOWNinCases	1
EHD1.24235.2	EHD1	EHD1	EH domain-containing protein 1	-1.07541	1.26127e-07	7.89375e-07	DOWNinCases	0
AMT.21240.6	AMT	GCST	Aminomethyltransferase, mitochondrial	-1.30379	1.26299e-07	7.89777e-07	DOWNinCases	0
CD1D.8749.194	CD1D	CD1D	Antigen-presenting glycoprotein CD1d	0.322192	1.27458e-07	7.9634e-07	UPinCases	0
OPCML.15622.13	OPCML	OBCAM	Opioid-binding protein/cell adhesion molecule	-0.516378	1.27813e-07	7.97747e-07	DOWNinCases	0
ITGAV.ITGB6.20189.4	ITGAV	Integrin aVb6	Integrin alpha V beta 6	-1.02314	1.28051e-07	7.97988e-07	DOWNinCases	0
ARPC5.18419.20	ARPC5	p16-ARC	Actin-related protein 2/3 complex subunit 5	-0.849013	1.29889e-07	8.08752e-07	DOWNinCases	0
CCDC97.23561.4	CCDC97	CCD97	Coiled-coil domain-containing protein 97	-0.453527	1.30031e-07	8.08947e-07	DOWNinCases	0
MAPK1.3115.64	MAPK1	MK01	Mitogen-activated protein kinase 1	-0.90185	1.30754e-07	8.12752e-07	DOWNinCases	0
LIMD1.25280.2	LIMD1	LIMD1	LIM domain-containing protein 1	-1.11429	1.31498e-07	8.1668e-07	DOWNinCases	0
CHL1.3601.54	CHL1	CHL1	Neural cell adhesion molecule L1-like protein	-0.505776	1.32457e-07	8.21235e-07	DOWNinCases	1
DNAJC10.8297.8	DNAJC10	DJC10	DnaJ homolog subfamily C member 10	-0.837563	1.32665e-07	8.21826e-07	DOWNinCases	0
AKT1.2867.52	AKT1	PKB	RAC-alpha serine/threonine-protein kinase	-1.1038	1.34181e-07	8.30506e-07	DOWNinCases	0
AP2A2.13621.31	AP2A2	AP2A2	AP-2 complex subunit alpha-2	-0.618699	1.35006e-07	8.34839e-07	DOWNinCases	0
NPTN.7194.36	NPTN	NPTN	Neuroplastin	-0.596485	1.3511e-07	8.34839e-07	DOWNinCases	1
TBL2.11227.31	TBL2	TBL2	Transducin beta-like protein 2	-1.31227	1.35495e-07	8.35799e-07	DOWNinCases	0
GSTM3.9748.31	GSTM3	GSTM3-3	Glutathione S-transferase Mu 3	-0.585047	1.37232e-07	8.45798e-07	DOWNinCases	1
TNNT2.5315.22	TNNT2	Troponin T	Troponin T, cardiac muscle	1.19711	1.42143e-07	8.75328e-07	UPinCases	0
STAT3.10346.5	STAT3	STAT3	Signal transducer and activator of transcription 3	-0.83272	1.45534e-07	8.93939e-07	DOWNinCases	0
MAPRE2.16856.79	MAPRE2	MARE2	Microtubule-associated protein RP/EB family member 2	-1.70925	1.46912e-07	9.01649e-07	DOWNinCases	0
FXR1.13076.4	FXR1	FXR1	Fragile X mental retardation syndrome-related protein 1	-0.958069	1.51209e-07	9.25996e-07	DOWNinCases	0
BMPER.3654.27	BMPER	BMPER	BMP-binding endothelial regulator protein	0.497075	1.51261e-07	9.25996e-07	UPinCases	0
VARS1.13083.18	VARS1	SYVC	Valine--tRNA ligase	-0.459083	1.52831e-07	9.34822e-07	DOWNinCases	0
GNPNAT1.13954.9	GNPNAT1	GNA1	Glucosamine 6-phosphate N-acetyltransferase	-1.24278	1.53216e-07	9.36394e-07	DOWNinCases	0
SNX1.6955.68	SNX1	SNX1	Sorting nexin-1	-0.688648	1.54206e-07	9.41651e-07	DOWNinCases	0
DPH2.23670.11	DPH2	DPH2	2-(3-amino-3-carboxypropyl)histidine synthase subunit 2	-0.394297	1.5468e-07	9.43755e-07	DOWNinCases	0
IFNAR1.9183.7	IFNAR1	IFN-a/b R1	Interferon alpha/beta receptor 1	-0.520558	1.56774e-07	9.5573e-07	DOWNinCases	0
ELAC1.21382.70	ELAC1	RNZ1	Zinc phosphodiesterase ELAC protein 1	-1.1928	1.57156e-07	9.57257e-07	DOWNinCases	0
SMURF2.13985.12	SMURF2	SMUF2	E3 ubiquitin-protein ligase SMURF2	0.44861	1.58277e-07	9.63281e-07	UPinCases	0
CLEC11A.4500.50	CLEC11A	SCGF-alpha	Stem cell growth factor-alpha	0.731768	1.6082e-07	9.77943e-07	UPinCases	1
UCHL5.17405.2	UCHL5	UCHL5	Ubiquitin carboxyl-terminal hydrolase isozyme L5	-0.785063	1.61705e-07	9.81841e-07	DOWNinCases	0
ARL8A.23281.29	ARL8A	ARL8A	ADP-ribosylation factor-like protein 8A	-1.72495	1.61731e-07	9.81841e-07	DOWNinCases	0
RAB2A.23008.4	RAB2A	RAB2A	Ras-related protein Rab-2A	-0.91184	1.63776e-07	9.92603e-07	DOWNinCases	0
NCOA7.25299.11	NCOA7	NCOA7	Nuclear receptor coactivator 7	-1.11607	1.64499e-07	9.96157e-07	DOWNinCases	0
SCMH1.12604.16	SCMH1	SCMH1	Polycomb protein SCMH1	-0.429632	1.67898e-07	1.01505e-06	DOWNinCases	0
EIF5A.5888.29	EIF5A	eIF-5A-1	Eukaryotic translation initiation factor 5A-1	-0.845376	1.71347e-07	1.03418e-06	DOWNinCases	0
CXCL13.3487.32	CXCL13	BLC	C-X-C motif chemokine 13	1.03556	1.72886e-07	1.04261e-06	UPinCases	0
GRHPR.18295.102	GRHPR	GRHPR	Glyoxylate reductase/hydroxypyruvate reductase	-0.841489	1.74124e-07	1.04921e-06	DOWNinCases	0
NUDT15.23584.2	NUDT15	NUD15	Nucleotide triphosphate diphosphatase NUDT15	-1.01951	1.79604e-07	1.07955e-06	DOWNinCases	0
SCO1.7853.19	SCO1	SCO1	Protein SCO1 homolog, mitochondrial	-0.386338	1.79888e-07	1.08037e-06	DOWNinCases	0
CCT7.13673.21	CCT7	TCPH	T-complex protein 1 subunit eta	-1.41557	1.81658e-07	1.0901e-06	DOWNinCases	0
GFPT1.21126.27	GFPT1	GFPT1	Glutamine--fructose-6-phosphate aminotransferase [isomerizing] 1	-0.926413	1.85922e-07	1.11477e-06	DOWNinCases	0
TPSAB1.9409.11	TPSAB1	TRYB1	Tryptase beta-1	-0.744339	1.86851e-07	1.1185e-06	DOWNinCases	1
EIF4B.14675.20	EIF4B	IF4B	Eukaryotic translation initiation factor 4B	-0.816463	1.8881e-07	1.12929e-06	DOWNinCases	0
NPW.9986.14	NPW	Neuropeptide W	Neuropeptide W	-1.07724	1.89108e-07	1.13015e-06	DOWNinCases	0
CLEC11A.2966.65	CLEC11A	SCGF-beta	Stem cell growth factor-beta	0.686006	1.89686e-07	1.13268e-06	UPinCases	1
QPCTL.8866.53	QPCTL	QPCTL	Glutaminyl-peptide cyclotransferase-like protein	-0.449878	1.94775e-07	1.16116e-06	DOWNinCases	1
DTYMK.19504.22	DTYMK	KTHY	Thymidylate kinase	-1.00565	1.98715e-07	1.18122e-06	DOWNinCases	0
N4BP2L2.22504.3	N4BP2L2	N42L2	NEDD4-binding protein 2-like 2	-0.932804	1.98859e-07	1.18122e-06	DOWNinCases	0
NACA.3854.24	NACA	NACA	Nascent polypeptide-associated complex subunit alpha	-0.99814	1.98892e-07	1.18122e-06	DOWNinCases	0
POSTN.3457.57	POSTN	Periostin	Periostin	-0.58275	1.9895e-07	1.18122e-06	DOWNinCases	0
NPTX2.6521.35	NPTX2	NPTX2	Neuronal pentraxin-2	0.455003	2.01388e-07	1.19472e-06	UPinCases	0
ASB13.21234.7	ASB13	ASB-13	Ankyrin repeat and SOCS box protein 13	-0.335714	2.07968e-07	1.23175e-06	DOWNinCases	0
CDH15.11215.6	CDH15	CAD15	Cadherin-15	0.465018	2.12283e-07	1.25628e-06	UPinCases	0
HEXIM1.15596.7	HEXIM1	HEXI1	Protein HEXIM1	-1.04129	2.12939e-07	1.25822e-06	DOWNinCases	0
COMTD1.23253.5	COMTD1	CMTD1	Catechol O-methyltransferase domain-containing protein 1	-0.388791	2.16522e-07	1.27825e-06	DOWNinCases	0
SLITRK5.4568.17	SLITRK5	SLIK5	SLIT and NTRK-like protein 5	-0.555798	2.19686e-07	1.29588e-06	DOWNinCases	1
ACO1.20054.28	ACO1	Aconitase 1	Cytoplasmic aconitate hydratase	-0.709543	2.20631e-07	1.3004e-06	DOWNinCases	0
RABGAP1L.25286.33	RABGAP1L	RBG1L	Rab GTPase-activating protein 1-like	-0.769675	2.22635e-07	1.3101e-06	DOWNinCases	0
SH3BGRL.12693.2	SH3BGRL	SH3L1	SH3 domain-binding glutamic acid-rich-like protein	-0.637037	2.25436e-07	1.32337e-06	DOWNinCases	0
TIMP1.23173.3	TIMP1	TIMP-1	Metalloproteinase inhibitor 1	0.655844	2.26893e-07	1.33085e-06	UPinCases	1
FGF12.4392.54	FGF12	FGF-12	Fibroblast growth factor 12	0.548611	2.33131e-07	1.36634e-06	UPinCases	0
INHBB.13676.46	INHBB	Inhibin bB chain	Inhibin beta B chain	-0.931282	2.34071e-07	1.36964e-06	DOWNinCases	1
RTCA.21369.15	RTCA	RTCA	RNA 3'-terminal phosphate cyclase	-0.878122	2.34551e-07	1.3706e-06	DOWNinCases	0
UBE2D3.UBB.21929.53	UBE2D3	UB2D3/ PolyUbiquitin K48	UB2D3/ PolyUbiquitin K48	-1.01295	2.34611e-07	1.3706e-06	DOWNinCases	0
C1QTNF4.23200.25	C1QTNF4	C1QT4	Complement C1q tumor necrosis factor-related protein 4	-0.74765	2.36297e-07	1.37935e-06	DOWNinCases	1
USP22.21757.49	USP22	UBP22	Ubiquitin carboxyl-terminal hydrolase 22	-0.795488	2.37373e-07	1.38452e-06	DOWNinCases	0
RHOA.9855.10	RHOA	Rho A	Transforming protein RhoA	-0.907966	2.38556e-07	1.39031e-06	DOWNinCases	0
LMNB2.20217.26	LMNB2	Lamin-B2	Lamin-B2	0.992191	2.42446e-07	1.41184e-06	UPinCases	1
HINT2.5612.16	HINT2	HINT2	Histidine triad nucleotide-binding protein 2, mitochondrial	-0.755906	2.45791e-07	1.4279e-06	DOWNinCases	0
MCCD1.8032.23	MCCD1	MCCD1	Mitochondrial coiled-coil domain protein 1	-0.3527	2.46376e-07	1.43016e-06	DOWNinCases	0
TTC9.24474.12	TTC9	TTC9A	Tetratricopeptide repeat protein 9A	-1.25124	2.4681e-07	1.43154e-06	DOWNinCases	1
MATN3.3208.2	MATN3	MATN3	Matrilin-3	0.501188	2.47849e-07	1.43642e-06	UPinCases	0
LASP1.21862.145	LASP1	LASP-1	LIM and SH3 domain protein 1	-1.11395	2.50019e-07	1.44784e-06	DOWNinCases	0
MRPL1.20433.19	MRPL1	RM01	39S ribosomal protein L1, mitochondrial	-1.56177	2.51e-07	1.45237e-06	DOWNinCases	0
EPHA4.7190.50	EPHA4	EPHA4	Ephrin type-A receptor 4	-0.591893	2.54661e-07	1.47122e-06	DOWNinCases	1
CPQ.9394.19	CPQ	Aminopeptidase	Carboxypeptidase Q	-0.706682	2.56476e-07	1.48053e-06	DOWNinCases	1
TWF2.23396.21	TWF2	TWF2	Twinfilin-2	-1.24777	2.61819e-07	1.51017e-06	DOWNinCases	0
CD109.3290.50	CD109	CD109	CD109 antigen	-0.448423	2.62999e-07	1.51458e-06	DOWNinCases	0
HSPA6.20213.82	HSPA6	HSP76	Heat shock 70 kDa protein 6	0.565307	2.63577e-07	1.51671e-06	UPinCases	1
TAF10.18270.10	TAF10	TAF10	Transcription initiation factor TFIID subunit 10	-0.359402	2.70836e-07	1.55725e-06	DOWNinCases	0
RPS12.21829.8	RPS12	RS12	40S ribosomal protein S12	-0.59927	2.71503e-07	1.55986e-06	DOWNinCases	0
ACSS2.25094.9	ACSS2	ACSA	Acetyl-coenzyme A synthetase, cytoplasmic	-0.439428	2.72838e-07	1.56629e-06	DOWNinCases	0
MDP1.20923.10	MDP1	MGDP1	Magnesium-dependent phosphatase 1	-0.937635	2.73985e-07	1.57164e-06	DOWNinCases	0
LMAN2L.8013.9	LMAN2L	LMA2L	VIP36-like protein	-1.00481	2.77427e-07	1.59013e-06	DOWNinCases	0
ARHGAP36.6289.78	ARHGAP36	RHG36	Rho GTPase-activating protein 36	0.57427	2.78756e-07	1.59649e-06	UPinCases	0
TGFB2.4156.74	TGFB2	TGF-b2	Transforming growth factor beta-2	0.392627	2.81507e-07	1.61098e-06	UPinCases	0
OBP2A.6526.77	OBP2A	OBP2A	Odorant-binding protein 2a	0.441123	2.83075e-07	1.61868e-06	UPinCases	0
CDK8.CCNC.3359.11	CDK8	CDK8/cyclin C	Cyclin-dependent kinase 8:Cyclin-C complex	-0.46347	2.85447e-07	1.63097e-06	DOWNinCases	0
RAB8B.20167.6	RAB8B	RAB8B	Ras-related protein Rab-8B	-1.6948	2.87133e-07	1.6381e-06	DOWNinCases	0
INPP4B.24427.33	INPP4B	INP4B	Type II inositol-3,4-bisphosphate 4-phosphatase	-0.632269	2.89034e-07	1.64759e-06	DOWNinCases	0
SRPK1.22432.83	SRPK1	SRPK1	Serine/threonine-protein kinase SRPK1	-0.699391	2.9084e-07	1.65659e-06	DOWNinCases	0
BAD.5870.23	BAD	BAD	Bcl2-associated agonist of cell death	-0.829128	2.91071e-07	1.6566e-06	DOWNinCases	0
LIPG.23148.100	LIPG	Endothelial lipase	Endothelial cell-derived lipase	0.514428	2.9433e-07	1.67385e-06	UPinCases	0
EPHA4.16288.17	EPHA4	EPHA4	Ephrin type-A receptor 4	-0.505428	2.95551e-07	1.67948e-06	DOWNinCases	1
CALCR.20542.47	CALCR	CALCR	Calcitonin receptor	-0.56835	2.95891e-07	1.6801e-06	DOWNinCases	0
LSAMP.2999.6	LSAMP	LSAMP	Limbic system-associated membrane protein	-0.394092	3.01517e-07	1.70805e-06	DOWNinCases	0
SPI1.22783.40	SPI1	SPI1	Transcription factor PU.1	0.68346	3.06078e-07	1.73254e-06	UPinCases	0
PDCL3.20935.4	PDCL3	PDCL3	Phosducin-like protein 3	-1.0372	3.14238e-07	1.77735e-06	DOWNinCases	0
CLIC4.15314.49	CLIC4	CLIC4	Chloride intracellular channel protein 4	-1.02056	3.17457e-07	1.79302e-06	DOWNinCases	0
DYTN.22124.94	DYTN	DYTN	Dystrotelin	-0.575571	3.17501e-07	1.79302e-06	DOWNinCases	1
THTPA.13595.20	THTPA	THTPA	Thiamine-triphosphatase	-0.450614	3.19015e-07	1.80017e-06	DOWNinCases	0
C2CD2L.23704.11	C2CD2L	TMM24	Transmembrane protein 24	-1.03877	3.19742e-07	1.80288e-06	DOWNinCases	0
CSNK2A1.CSNK2B.5225.50	CSNK2A1	CK2-A1:B	Casein kinase II 2-alpha:2-beta heterotetramer	-1.12419	3.20504e-07	1.80578e-06	DOWNinCases	0
B9D2.21356.6	B9D2	B9D2	B9 domain-containing protein 2	-0.460868	3.2176e-07	1.81145e-06	DOWNinCases	0
MASP1.9125.23	MASP1	MASP3	Mannan-binding lectin serine protease 1	0.412005	3.2614e-07	1.8347e-06	UPinCases	0
APAF1.13583.19	APAF1	Apaf-1	Apoptotic protease-activating factor 1	-0.546541	3.35534e-07	1.88463e-06	DOWNinCases	0
F8.13499.30	F8	Coagulation Factor VIII	Coagulation Factor VIII	0.503071	3.36018e-07	1.8859e-06	UPinCases	0
SAA1.4336.2	SAA1	SAA	Serum amyloid A-1 protein	2.57251	3.37923e-07	1.89513e-06	UPinCases	1
MPI.25233.2	MPI	MPI	Mannose-6-phosphate isomerase	-0.84756	3.43292e-07	1.92375e-06	DOWNinCases	0
PPFIA1.13975.56	PPFIA1	LIPA1	Liprin-alpha-1	-0.982673	3.44686e-07	1.93008e-06	DOWNinCases	0
PIP4K2B.23006.19	PIP4K2B	PI42B	Phosphatidylinositol 5-phosphate 4-kinase type-2 beta	-0.940652	3.4984e-07	1.95443e-06	DOWNinCases	0
CHST15.4469.78	CHST15	ST4S6	Carbohydrate sulfotransferase 15	0.562681	3.51908e-07	1.96448e-06	UPinCases	0
JOSD1.20449.72	JOSD1	JOS1	Josephin-1	0.449385	3.53494e-07	1.97164e-06	UPinCases	0
TIRAP.9839.148	TIRAP	Tirap	Toll/interleukin-1 receptor domain-containing adapter protein	-0.895514	3.53731e-07	1.97164e-06	DOWNinCases	0
NEIL1.21802.53	NEIL1	NEIL1	Endonuclease 8-like 1	-0.540473	3.56005e-07	1.9828e-06	DOWNinCases	0
GLS.24920.6	GLS	GLSK	Glutaminase kidney isoform, mitochondrial	-0.858753	3.56382e-07	1.98338e-06	DOWNinCases	0
CGA.TSHB.3521.16	CGA	TSH	Thyroid Stimulating Hormone	-1.0593	3.57164e-07	1.9847e-06	DOWNinCases	0
LRFN4.21696.80	LRFN4	LRFN4	Leucine-rich repeat and fibronectin type-III domain-containing protein 4	-0.425702	3.61562e-07	2.0076e-06	DOWNinCases	0
CCL22.22993.9	CCL22	MDC	C-C motif chemokine 22	-0.880392	3.65447e-07	2.02763e-06	DOWNinCases	1
RPS6KA6.12688.115	RPS6KA6	KS6A6	Ribosomal protein S6 kinase alpha-6	-0.762847	3.66909e-07	2.03419e-06	DOWNinCases	0
LBP.3074.6	LBP	LBP	Lipopolysaccharide-binding protein	0.750524	3.70325e-07	2.05001e-06	UPinCases	1
SF1.12777.11	SF1	SF01	Splicing factor 1	0.332547	3.71795e-07	2.05659e-06	UPinCases	0
FLRT2.13122.19	FLRT2	FLRT2	Leucine-rich repeat transmembrane protein FLRT2	-0.727797	3.73017e-07	2.06178e-06	DOWNinCases	1
ASPSCR1.25085.37	ASPSCR1	ASPC1	Tether containing UBX domain for GLUT4	-0.815153	3.7379e-07	2.06449e-06	DOWNinCases	0
MTHFD1.12575.30	MTHFD1	C1TC	C-1-tetrahydrofolate synthase, cytoplasmic	-0.952388	3.75808e-07	2.07406e-06	DOWNinCases	0
CTNNA1.24426.191	CTNNA1	CTNA1	Catenin alpha-1	-0.415083	3.78933e-07	2.08973e-06	DOWNinCases	0
DPH5.23373.77	DPH5	DPH5	Diphthine methyl ester synthase	-0.442797	3.79905e-07	2.0935e-06	DOWNinCases	0
GRB10.11358.15	GRB10	GRB10	Growth factor receptor-bound protein 10	-1.30601	3.89668e-07	2.14568e-06	DOWNinCases	0
EDAR.2977.7	EDAR	EDAR	Tumor necrosis factor receptor superfamily member EDAR	-0.555324	3.90303e-07	2.14593e-06	DOWNinCases	0
AAGAB.11926.23	AAGAB	P34	Alpha- and gamma-adaptin-binding protein p34	-0.80044	3.95255e-07	2.16988e-06	DOWNinCases	0
CXCL13.13701.2	CXCL13	BLC	C-X-C motif chemokine 13	1.1842	3.98846e-07	2.18795e-06	UPinCases	0
CDH4.20589.5	CDH4	CADH4	Cadherin-4	-0.806106	4.03115e-07	2.2097e-06	DOWNinCases	0
PACSIN1.12676.1	PACSIN1	PACN1	Protein kinase C and casein kinase substrate in neurons protein 1	-1.09154	4.03639e-07	2.21076e-06	DOWNinCases	0
FOXM1.10056.5	FOXM1	FOXM1	Forkhead box protein M1	-0.765055	4.03916e-07	2.21076e-06	DOWNinCases	0
ADAM11.6586.19	ADAM11	ADA11	Disintegrin and metalloproteinase domain-containing protein 11	-0.389762	4.05291e-07	2.21663e-06	DOWNinCases	0
UCK1.23364.3	UCK1	UCK1	Uridine-cytidine kinase 1	-1.28461	4.13447e-07	2.257e-06	DOWNinCases	0
STAT3.10354.57	STAT3	STAT3	Signal transducer and activator of transcription 3	-0.804281	4.13602e-07	2.257e-06	DOWNinCases	0
COMMD9.17683.2	COMMD9	COMD9	COMM domain-containing protein 9	-0.773018	4.25406e-07	2.31967e-06	DOWNinCases	0
OXCT1.25043.74	OXCT1	SCOT	Succinyl-CoA:3-ketoacid-coenzyme A transferase 1, mitochondrial	-0.915109	4.28435e-07	2.33444e-06	DOWNinCases	0
FAM20B.7198.197	FAM20B	FA20B	Glycosaminoglycan xylosylkinase	-0.385135	4.3085e-07	2.34585e-06	DOWNinCases	1
ADAMTSL2.6379.62	ADAMTSL2	ATL2	ADAMTS-like protein 2	0.512552	4.33993e-07	2.3612e-06	UPinCases	0
TFB1M.21344.31	TFB1M	TFB1M	Dimethyladenosine transferase 1, mitochondrial	-1.32261	4.42454e-07	2.40543e-06	DOWNinCases	0
GABARAPL1.12661.44	GABARAPL1	GBRL1	Gamma-aminobutyric acid receptor-associated protein-like 1	0.518787	4.49061e-07	2.43919e-06	UPinCases	1
KIF22.12734.112	KIF22	KIF22	Kinesin-like protein KIF22	0.395032	4.49333e-07	2.43919e-06	UPinCases	0
XRCC6.2835.1	XRCC6	Ku70	X-ray repair cross-complementing protein 6	0.596939	4.53054e-07	2.45756e-06	UPinCases	1
GOT2.18233.10	GOT2	GOT2	Aspartate aminotransferase, mitochondrial	-1.16606	4.54544e-07	2.46288e-06	DOWNinCases	0
SEPTIN6.17693.2	SEPTIN6	Septin-6	Septin-6	-0.712179	4.54712e-07	2.46288e-06	DOWNinCases	0
LAMTOR3.12490.92	LAMTOR3	LTOR3	Ragulator complex protein LAMTOR3	-0.373368	4.58313e-07	2.48054e-06	DOWNinCases	0
EIF3B.24979.17	EIF3B	EIF3B	Eukaryotic translation initiation factor 3 subunit B	-0.988164	4.68978e-07	2.53074e-06	DOWNinCases	0
PEAR1.8275.31	PEAR1	PEAR1	Platelet endothelial aggregation receptor 1	-0.420469	4.70466e-07	2.5369e-06	DOWNinCases	0
MSC.23322.2	MSC	MUSC	Musculin	-0.886444	4.76503e-07	2.56755e-06	DOWNinCases	0
NEO1.8900.28	NEO1	NEO1	Neogenin	-0.400057	4.80021e-07	2.58459e-06	DOWNinCases	0
CHMP2A.17728.61	CHMP2A	CHM2A	Charged multivesicular body protein 2a	-1.16389	4.80611e-07	2.58586e-06	DOWNinCases	0
SHH.2743.5	SHH	Sonic Hedgehog	Sonic hedgehog protein	-0.496547	4.82982e-07	2.5967e-06	DOWNinCases	0
MYL7.19296.51	MYL7	MLRA	Myosin regulatory light chain 2, atrial isoform	-0.41525	4.91049e-07	2.63812e-06	DOWNinCases	0
ABL1.3341.33	ABL1	ABL1	Tyrosine-protein kinase ABL1	0.324845	4.95589e-07	2.66055e-06	UPinCases	0
CCT8.12699.28	CCT8	TCP-1-theta	T-complex protein 1 subunit theta	-1.01318	4.99585e-07	2.67773e-06	DOWNinCases	0
TFPI.3336.50	TFPI	TFPI	Tissue factor pathway inhibitor	0.518191	4.99892e-07	2.67773e-06	UPinCases	0
C5.2851.63	C5	C5a	C5a anaphylatoxin	0.429268	5.0397e-07	2.69561e-06	UPinCases	0
MACROD2.25459.3	MACROD2	MACD2	O-acetyl-ADP-ribose deacetylase MACROD2	-0.443301	5.11091e-07	2.72969e-06	DOWNinCases	1
ACADVL.19262.219	ACADVL	ACADV	Very long-chain specific acyl-CoA dehydrogenase, mitochondrial	-1.38708	5.14845e-07	2.74772e-06	DOWNinCases	0
CTPS1.23705.42	CTPS1	PYRG1	CTP synthase 1	-0.848292	5.1669e-07	2.75555e-06	DOWNinCases	0
GDF11.MSTN.2765.4	GDF11	GDF-11/8	Growth/differentiation factor 11/8	-0.509028	5.22313e-07	2.77944e-06	DOWNinCases	0
ADH6.18206.18	ADH6	ADH6	Alcohol dehydrogenase 6	-1.0634	5.23191e-07	2.78208e-06	DOWNinCases	0
PKLR.11203.97	PKLR	KPYR	Pyruvate kinase PKLR	1.07012	5.32247e-07	2.82817e-06	UPinCases	0
ENO1.11105.171	ENO1	Alpha enolase	Alpha-enolase	-1.04923	5.33087e-07	2.83057e-06	DOWNinCases	0
ARHGDIB.9846.32	ARHGDIB	Rho-GDI beta	Rho GDP-dissociation inhibitor 2	-0.767667	5.33964e-07	2.83316e-06	DOWNinCases	0
CLUL1.21492.19	CLUL1	CLUL1	Clusterin-like protein 1	-0.433406	5.3815e-07	2.85329e-06	DOWNinCases	0
ELANE.13671.40	ELANE	Elastase	Neutrophil elastase	0.506788	5.39264e-07	2.85712e-06	UPinCases	1
DLG4.8070.88	DLG4	DLG4	Disks large homolog 4	-0.687612	5.41296e-07	2.8658e-06	DOWNinCases	0
ALOX15B.12422.143	ALOX15B	LX15B	Arachidonate 15-lipoxygenase B	0.702954	5.50971e-07	2.91279e-06	UPinCases	0
NIP7.12564.9	NIP7	NIP7	60S ribosome subunit biogenesis protein NIP7 homolog	-0.975107	5.59634e-07	2.95644e-06	DOWNinCases	0
EPDR1.9040.144	EPDR1	EPDR1	Mammalian ependymin-related protein 1	0.341491	5.60411e-07	2.9584e-06	UPinCases	0
PURB.18300.39	PURB	PURB	Transcriptional activator protein Pur-beta	-0.901862	5.61526e-07	2.96214e-06	DOWNinCases	0
HLA.G.19636.23	HLA-G	HLA-G	HLA class I histocompatibility antigen, alpha chain G	0.329511	5.66949e-07	2.98846e-06	UPinCases	0
MEPE.3209.69	MEPE	MEPE	Matrix extracellular phosphoglycoprotein	0.361045	5.67336e-07	2.98846e-06	UPinCases	0
PAWR.9565.6	PAWR	PAWR	PRKC apoptosis WT1 regulator protein	-0.970479	5.73405e-07	3.01825e-06	DOWNinCases	0
CCDC134.15300.66	CCDC134	CC134	Coiled-coil domain-containing protein 134	-0.898144	5.76616e-07	3.03296e-06	DOWNinCases	0
FAM163B.10880.38	FAM163B	F163B	Protein FAM163B	-0.465291	5.89046e-07	3.0961e-06	DOWNinCases	0
ACTN4.25057.2	ACTN4	ACTN4	Alpha-actinin-4	-0.571729	5.99504e-07	3.1488e-06	DOWNinCases	0
PTP4A3.19231.22	PTP4A3	PRL-3	Protein tyrosine phosphatase type IVA 3	-0.527331	6.06832e-07	3.18499e-06	DOWNinCases	0
TSEN34.22774.20	TSEN34	SEN34	tRNA-splicing endonuclease subunit Sen34	-0.655898	6.11353e-07	3.20641e-06	DOWNinCases	0
KPNA5.21235.11	KPNA5	IMA6	Importin subunit alpha-6	-0.97703	6.21339e-07	3.25644e-06	DOWNinCases	0
EED.21116.13	EED	EED	Polycomb protein EED	-0.624788	6.26081e-07	3.27658e-06	DOWNinCases	0
RIPK1.22549.73	RIPK1	RIP	RIP	-0.427273	6.26676e-07	3.27734e-06	DOWNinCases	0
FMOD.6367.66	FMOD	fibromodulin	fibromodulin	-0.648334	6.28467e-07	3.28435e-06	DOWNinCases	1
ROR1.2590.69	ROR1	ROR1	Inactive tyrosine-protein kinase transmembrane receptor ROR1	-0.750245	6.32715e-07	3.30051e-06	DOWNinCases	1
HAX1.21206.218	HAX1	HAX1	HCLS1-associated protein X-1	-0.428596	6.34691e-07	3.30738e-06	DOWNinCases	0
GSN.16607.78	GSN	Gelsolin	Gelsolin	-0.348402	6.38373e-07	3.32419e-06	DOWNinCases	0
VSIR.14123.34	VSIR	GI24	V-type immunoglobulin domain-containing suppressor of T-cell activation	-0.659961	6.40882e-07	3.33334e-06	DOWNinCases	1
FIS1.17746.77	FIS1	FIS1	Mitochondrial fission 1 protein	-0.550917	6.41329e-07	3.33334e-06	DOWNinCases	0
STX7.8274.64	STX7	Syntaxin-7	Syntaxin-7	-0.669376	6.41503e-07	3.33334e-06	DOWNinCases	0
ITGAV.ITGB5.4917.62	ITGAV	Integrin aVb5	Integrin alpha-V: beta-5 complex	-0.551751	6.49346e-07	3.37169e-06	DOWNinCases	0
PML.25270.3	PML	PML	Probable transcription factor PML	0.590902	6.51215e-07	3.37899e-06	UPinCases	0
MGAT3.21771.47	MGAT3	MGAT3	Beta-1,4-mannosyl-glycoprotein 4-beta-N-acetylglucosaminyltransferase	-0.628105	6.58482e-07	3.41426e-06	DOWNinCases	1
SHBG.4929.55	SHBG	SHBG	Sex hormone-binding globulin	-0.930595	6.63855e-07	3.43536e-06	DOWNinCases	1
CPM.9416.77	CPM	CBPM	Carboxypeptidase M	-0.517476	6.63966e-07	3.43536e-06	DOWNinCases	1
ARC.21343.3	ARC	ARC	Activity-regulated cytoskeleton-associated protein	-0.322225	6.70335e-07	3.46586e-06	DOWNinCases	0
TKFC.23644.19	TKFC	DAK	Dihydroxyacetone kinase	-0.776016	6.73167e-07	3.47803e-06	DOWNinCases	0
BTLA.16308.14	BTLA	BTLA	B- and T-lymphocyte attenuator	-0.447141	6.74192e-07	3.48085e-06	DOWNinCases	0
CDH17.16613.3	CDH17	CAD17	Cadherin-17	-0.962913	6.82956e-07	3.52112e-06	DOWNinCases	1
RGS1.18945.11	RGS1	RGS1	Regulator of G-protein signaling 1	0.329699	6.85684e-07	3.53268e-06	UPinCases	0
LPL.21987.76	LPL	LPL	Lipoprotein lipase	0.330939	6.87835e-07	3.54126e-06	UPinCases	0
EURL.23212.8	EURL	EURL	Protein EURL homolog	-0.478476	7.06379e-07	3.62903e-06	DOWNinCases	0
S100A12.5852.6	S100A12	S100A12	Protein S100-A12	1.02818	7.19481e-07	3.69374e-06	UPinCases	0
VPS28.17155.1	VPS28	VPS28 protein homolog	Vacuolar protein sorting-associated protein 28 homolog	-0.545975	7.22241e-07	3.70269e-06	DOWNinCases	0
IL7R.5089.11	IL7R	IL-7 Ra	Interleukin-7 receptor subunit alpha	0.405505	7.28431e-07	3.7318e-06	UPinCases	0
BCAT2.19365.11	BCAT2	BCAT2	Branched-chain-amino-acid aminotransferase, mitochondrial	-1.01722	7.30021e-07	3.73732e-06	DOWNinCases	0
ACE.10714.7	ACE	ACE	Angiotensin-converting enzyme	-0.441507	7.35744e-07	3.76171e-06	DOWNinCases	0
EIF3G.11454.87	EIF3G	EIF3G	Eukaryotic translation initiation factor 3 subunit G	-0.755335	7.35819e-07	3.76171e-06	DOWNinCases	0
GOLM1.17456.53	GOLM1	GOLM1	Golgi membrane protein 1	0.832068	7.38897e-07	3.7748e-06	UPinCases	1
CMPK1.18243.9	CMPK1	Cytidylate kinase	UMP-CMP kinase	-0.726202	7.39444e-07	3.77495e-06	DOWNinCases	0
ADAT2.20955.20	ADAT2	ADAT2	tRNA-specific adenosine deaminase 2	-0.375345	7.45323e-07	3.79708e-06	DOWNinCases	0
HNRNPA0.24697.48	HNRNPA0	ROA0	Heterogeneous nuclear ribonucleoprotein A0	-0.846876	7.45344e-07	3.79708e-06	DOWNinCases	0
DSTN.22958.6	DSTN	DEST	Destrin	-1.12223	7.5576e-07	3.84477e-06	DOWNinCases	0
TPSG1.14103.12	TPSG1	TPSG1	Tryptase gamma	0.374617	7.572e-07	3.84941e-06	UPinCases	0
ACBD6.10075.75	ACBD6	ACBD6	Acyl-CoA-binding domain-containing protein 6	-1.19882	7.60088e-07	3.8614e-06	DOWNinCases	0
ARHGEF1.13976.9	ARHGEF1	ARHG1	Rho guanine nucleotide exchange factor 1	-0.601911	7.65081e-07	3.88405e-06	DOWNinCases	0
MRI1.23340.37	MRI1	MTNA	Methylthioribose-1-phosphate isomerase	-0.496089	7.81508e-07	3.96192e-06	DOWNinCases	0
PDAP1.19240.265	PDAP1	HAP28	28 kDa heat- and acid-stable phosphoprotein	-1.11351	7.87467e-07	3.98658e-06	DOWNinCases	0
PDHA2.25249.33	PDHA2	ODPAT	Pyruvate dehydrogenase E1 component subunit alpha, testis-specific form, mitochondrial	-1.17132	7.99447e-07	4.04341e-06	DOWNinCases	0
CYB5R4.24959.20	CYB5R4	NB5R4	Cytochrome b5 reductase 4	-0.887064	7.99802e-07	4.04341e-06	DOWNinCases	0
IDS.3198.4	IDS	IDS	Iduronate 2-sulfatase	-0.456115	8.0286e-07	4.05606e-06	DOWNinCases	0
OSBP.25055.56	OSBP	OSBP1	Oxysterol-binding protein 1	-0.882882	8.17254e-07	4.12591e-06	DOWNinCases	0
ADD2.24468.36	ADD2	ADDB	Beta-adducin	-0.570174	8.30013e-07	4.18509e-06	DOWNinCases	0
C1QL2.6423.66	C1QL2	C1QL2	Complement C1q-like protein 2	-0.514773	8.30124e-07	4.18509e-06	DOWNinCases	0
CCN1.6264.9	CCN1	CYR61	Protein CYR61	0.553197	8.34699e-07	4.20524e-06	UPinCases	1
HGFAC.8385.248	HGFAC	HGFA	Hepatocyte growth factor activator	-0.943607	8.55683e-07	4.3062e-06	DOWNinCases	1
FUBP3.24952.28	FUBP3	FUBP3	Far upstream element-binding protein 3	-0.585269	8.63997e-07	4.34384e-06	DOWNinCases	0
BCHE.15514.26	BCHE	Pseudocholinesterase	Cholinesterase	-0.521245	8.67316e-07	4.35751e-06	DOWNinCases	1
FBLN5.15585.304	FBLN5	fibulin 5	Fibulin-5	0.492432	8.80243e-07	4.41333e-06	UPinCases	0
DNER.9769.48	DNER	DNER	Delta and Notch-like epidermal growth factor-related receptor	-0.405086	9.00245e-07	4.50122e-06	DOWNinCases	0
UBL4A.11490.42	UBL4A	UBL4A	Ubiquitin-like protein 4A	-0.670227	9.09296e-07	4.54336e-06	DOWNinCases	0
DHFR.9823.2	DHFR	DYR	Dihydrofolate reductase	0.385188	9.11834e-07	4.55292e-06	UPinCases	0
NCL.13655.34	NCL	Nucleolin	Nucleolin	0.565997	9.1465e-07	4.56073e-06	UPinCases	1
ANKRD2.25274.2	ANKRD2	ANKR2	Ankyrin repeat domain-containing protein 2	-0.918054	9.18852e-07	4.57855e-06	DOWNinCases	0
IL36RN.18375.28	IL36RN	IL-1F5	Interleukin-36 receptor antagonist protein	-0.614766	9.26032e-07	4.61117e-06	DOWNinCases	0
PCDH9.10558.26	PCDH9	PCDH9	Protocadherin-9	-0.543346	9.30018e-07	4.62786e-06	DOWNinCases	0
ITPRIPL1.9221.6	ITPRIPL1	IPIL1	Inositol 1,4,5-trisphosphate receptor-interacting protein-like 1	-0.528335	9.35397e-07	4.64922e-06	DOWNinCases	0
IP6K1.22404.4	IP6K1	IP6K1	Inositol hexakisphosphate kinase 1	-0.7539	9.35588e-07	4.64922e-06	DOWNinCases	0
LRRC4.21690.31	LRRC4	LRRC4	Leucine-rich repeat-containing protein 4	-0.522076	9.51485e-07	4.72499e-06	DOWNinCases	0
TBCC.21326.28	TBCC	TBCC	Tubulin-specific chaperone C	-0.673757	9.57447e-07	4.75136e-06	DOWNinCases	0
KYAT3.12682.5	KYAT3	KAT3	Kynurenine--oxoglutarate transaminase 3	-0.693997	9.76684e-07	4.84353e-06	DOWNinCases	0
SPG21.11122.97	SPG21	SPG21	Maspardin	-0.755414	9.94457e-07	4.92496e-06	DOWNinCases	0
TRA2B.12373.73	TRA2B	TRA2B	Transformer-2 protein homolog beta	0.861759	9.952e-07	4.92529e-06	UPinCases	1
CDC42.9840.2	CDC42	Cdc42Hs	Cell division control protein 42 homolog	-1.23142	1.00139e-06	4.95258e-06	DOWNinCases	0
STX6.10945.11	STX6	Syntaxin-6	Syntaxin-6	-0.342339	1.01175e-06	4.99703e-06	DOWNinCases	0
MCEE.9388.18	MCEE	MCEE	Methylmalonyl-CoA epimerase, mitochondrial	-0.924648	1.02085e-06	5.03853e-06	DOWNinCases	0
IGLL1.6485.59	IGLL1	IGLL1	Immunoglobulin lambda-like polypeptide 1	-0.957806	1.0248e-06	5.0546e-06	DOWNinCases	0
SLC25A18.5280.68	SLC25A18	GHC2	Mitochondrial glutamate carrier 2	0.411271	1.02715e-06	5.06278e-06	UPinCases	0
GSN.4775.34	GSN	Gelsolin	Gelsolin	-0.409664	1.03008e-06	5.07379e-06	DOWNinCases	0
PAPLN.11254.13	PAPLN	PPN	Papilin	0.369771	1.06091e-06	5.2186e-06	UPinCases	0
VPS4B.12668.7	VPS4B	VPS4B	Vacuolar protein sorting-associated protein 4B	-0.49716	1.06232e-06	5.22198e-06	DOWNinCases	0
MLX.23294.19	MLX	MLX	Max-like protein X	-0.657377	1.07057e-06	5.25902e-06	DOWNinCases	0
CLPSL1.9526.3	CLPSL1	COLL1	Colipase-like protein 1	0.960615	1.08375e-06	5.31656e-06	UPinCases	1
EXD1.23591.9	EXD1	EXD1	piRNA biogenesis protein EXD1	-0.780171	1.08448e-06	5.31656e-06	DOWNinCases	0
KARS1.19249.18	KARS1	SYK	Lysine--tRNA ligase	-0.929965	1.09442e-06	5.36172e-06	DOWNinCases	0
PSG9.9335.28	PSG9	PSG9	Pregnancy-specific beta-1-glycoprotein 9	-0.639014	1.10317e-06	5.40094e-06	DOWNinCases	0
LGMN.7840.64	LGMN	LGMN	Legumain	-0.864383	1.10491e-06	5.40581e-06	DOWNinCases	0
TMOD2.12853.112	TMOD2	TMOD2	Tropomodulin-2	-0.955781	1.11248e-06	5.43919e-06	DOWNinCases	0
TMPO.8265.225	TMPO	LAP2B	Lamina-associated polypeptide 2, isoforms beta/gamma	0.817183	1.11525e-06	5.44909e-06	UPinCases	1
NTAN1.23524.2	NTAN1	NTAN1	Protein N-terminal asparagine amidohydrolase	-0.479401	1.13207e-06	5.52016e-06	DOWNinCases	0
PPIH.12449.16	PPIH	PPIH	Peptidyl-prolyl cis-trans isomerase H	-0.856427	1.13749e-06	5.54287e-06	DOWNinCases	0
FNTA.25473.62	FNTA	FNTA	Protein farnesyltransferase/geranylgeranyltransferase type-1 subunit alpha	-0.501596	1.16051e-06	5.64748e-06	DOWNinCases	0
RAB6A.20083.1	RAB6A	RAB6A	Ras-related protein Rab-6A	-1.34311	1.16347e-06	5.65815e-06	DOWNinCases	0
YWHAG.4179.57	YWHAG	14-3-3 protein gamma	14-3-3 protein gamma	-0.416432	1.17865e-06	5.72811e-06	DOWNinCases	0
CSF1.10741.22	CSF1	CSF-1	Macrophage colony-stimulating factor 1	0.720489	1.18137e-06	5.73754e-06	UPinCases	1
SMAD1.9838.4	SMAD1	SMAD1	Mothers against decapentaplegic homolog 1	-0.538255	1.18675e-06	5.75979e-06	DOWNinCases	0
DDR1.11836.144	DDR1	discoidin domain receptor 1	Epithelial discoidin domain-containing receptor 1	-0.322857	1.21047e-06	5.87102e-06	DOWNinCases	1
SUMF2.6069.71	SUMF2	SUMF2	Sulfatase-modifying factor 2	0.50592	1.21982e-06	5.9085e-06	UPinCases	1
CFAP36.21109.1	CFAP36	CFA36	Cilia- and flagella-associated protein 36	-0.647771	1.22104e-06	5.91047e-06	DOWNinCases	0
CCL26.9168.31	CCL26	Eotaxin-3	C-C motif chemokine 26	0.461768	1.24877e-06	6.03271e-06	UPinCases	0
HSPD1.2682.68	HSPD1	HSP 60	60 kDa heat shock protein, mitochondrial	-0.966746	1.25013e-06	6.03524e-06	DOWNinCases	0
DNAJC5B.24669.12	DNAJC5B	DNJ5B	DnaJ homolog subfamily C member 5B	-0.571905	1.26375e-06	6.09293e-06	DOWNinCases	0
VEGFA.19437.61	VEGFA	L-VEGF165	Isoform L-VEGF165	0.649432	1.27667e-06	6.15114e-06	UPinCases	0
PRDX3.8358.30	PRDX3	Peroxiredoxin-3	Thioredoxin-dependent peroxide reductase, mitochondrial	-1.03626	1.29685e-06	6.23192e-06	DOWNinCases	0
VPS25.18189.12	VPS25	VPS25	Vacuolar protein-sorting-associated protein 25	-0.895961	1.34389e-06	6.45369e-06	DOWNinCases	0
DPP7.8346.9	DPP7	DPP2	Dipeptidyl peptidase 2	-0.679003	1.35259e-06	6.49118e-06	DOWNinCases	1
SNAP29.12357.41	SNAP29	SNP29	Synaptosomal-associated protein 29	-0.438814	1.35452e-06	6.49617e-06	DOWNinCases	0
MRTO4.21310.37	MRTO4	MRT4	mRNA turnover protein 4 homolog	0.457609	1.36486e-06	6.54146e-06	UPinCases	1
CYLD.21765.10	CYLD	CYLD	Ubiquitin carboxyl-terminal hydrolase CYLD	-0.7717	1.36892e-06	6.55659e-06	DOWNinCases	0
UBE2Q1.21727.15	UBE2Q1	UB2Q1	Ubiquitin-conjugating enzyme E2 Q1	-0.884652	1.37529e-06	6.5828e-06	DOWNinCases	0
PPIA.3844.2	PPIA	Cyclophilin A	Peptidyl-prolyl cis-trans isomerase A	-0.577338	1.38446e-06	6.62233e-06	DOWNinCases	0
ANXA10.13605.16	ANXA10	ANX10	Annexin A10	-0.436397	1.40647e-06	6.72317e-06	DOWNinCases	0
RANBP1.18191.23	RANBP1	RANG	Ran-specific GTPase-activating protein	-0.658164	1.42271e-06	6.79637e-06	DOWNinCases	0
TSEN15.21182.8	TSEN15	SEN15	tRNA-splicing endonuclease subunit Sen15	0.497321	1.43106e-06	6.83174e-06	UPinCases	0
NAP1L4.19188.21	NAP1L4	NAP2L	nucleosome assembly protein 1-like 4	-1.15725	1.43381e-06	6.84043e-06	DOWNinCases	0
PLA2G4A.21430.4	PLA2G4A	cPLA2-alpha	Cytosolic phospholipase A2 alpha	-1.09341	1.44381e-06	6.88362e-06	DOWNinCases	0
TACO1.9257.14	TACO1	TACO1	Translational activator of cytochrome c oxidase 1	-1.11313	1.46473e-06	6.96667e-06	DOWNinCases	0
SCFD1.24898.39	SCFD1	SCFD1	Sec1 family domain-containing protein 1	-0.667638	1.46506e-06	6.96667e-06	DOWNinCases	0
NT5C2.11288.26	NT5C2	5NTC	Cytosolic purine 5'-nucleotidase	-0.697114	1.47327e-06	7.00083e-06	DOWNinCases	0
CUTA.21604.2	CUTA	CUTA	Protein CutA	0.375247	1.47416e-06	7.00083e-06	UPinCases	0
DAPK1.13955.33	DAPK1	DAPK1	Death-associated protein kinase 1	-0.47955	1.48916e-06	7.06746e-06	DOWNinCases	0
FAM118B.23350.66	FAM118B	F118B	Protein FAM118B	-0.949952	1.51407e-06	7.17631e-06	DOWNinCases	0
FKBP2.9339.204	FKBP2	FKBP2	Peptidyl-prolyl cis-trans isomerase FKBP2	-0.851015	1.53614e-06	7.26675e-06	DOWNinCases	0
TTC27.24444.10	TTC27	TTC27	Tetratricopeptide repeat protein 27	-0.59878	1.53913e-06	7.27616e-06	DOWNinCases	0
CXCL2.22972.26	CXCL2	Gro-b	Gro-beta	-1.16133	1.54204e-06	7.28519e-06	DOWNinCases	0
TNFRSF9.2598.9	TNFRSF9	4-1BB	Tumor necrosis factor receptor superfamily member 9	0.372152	1.57053e-06	7.40538e-06	UPinCases	0
CNTFR.2711.6	CNTFR	CNTFR alpha	Ciliary neurotrophic factor receptor subunit alpha	-0.608363	1.57295e-06	7.41201e-06	DOWNinCases	1
EEF1D.17826.341	EEF1D	EF1D	Elongation factor 1-delta	-0.703887	1.60259e-06	7.54369e-06	DOWNinCases	0
C11orf49.23767.1	C11orf49	CK049	UPF0705 protein C11orf49	-0.420809	1.60394e-06	7.54369e-06	DOWNinCases	0
ALKBH2.18400.52	ALKBH2	ALKB2	DNA oxidative demethylase ALKBH2	0.35697	1.604e-06	7.54369e-06	UPinCases	0
ADAMTSL1.16890.37	ADAMTSL1	ATL1	ADAMTS-like protein 1	-0.58942	1.61834e-06	7.60621e-06	DOWNinCases	1
RAB1B.19278.19	RAB1B	RAB1B	Ras-related protein Rab-1B	-1.37328	1.63272e-06	7.66885e-06	DOWNinCases	0
FGL1.5581.28	FGL1	FGL1	Fibrinogen-like protein 1	0.884122	1.63746e-06	7.68282e-06	UPinCases	1
TXNRD3NB.21361.8	TXNRD3NB	TR3N	Protein TXNRD3NB	-0.388455	1.63781e-06	7.68282e-06	DOWNinCases	0
MAP2K5.22041.26	MAP2K5	MP2K5	Dual specificity mitogen-activated protein kinase kinase 5	-1.00041	1.64169e-06	7.69609e-06	DOWNinCases	0
PTPN11.3397.7	PTPN11	SHP-2	Tyrosine-protein phosphatase non-receptor type 11	-0.663898	1.65077e-06	7.72871e-06	DOWNinCases	0
LACTB2.22381.1	LACTB2	LACB2	Endoribonuclease LACTB2	-0.820904	1.66971e-06	7.81235e-06	DOWNinCases	0
NAPG.17773.26	NAPG	SNAG	Gamma-soluble NSF attachment protein	-0.843181	1.72332e-06	8.05286e-06	DOWNinCases	0
TBC1D25.24424.25	TBC1D25	TBC25	TBC1 domain family member 25	-0.68115	1.77306e-06	8.27464e-06	DOWNinCases	0
CD27.5412.53	CD27	CD27	CD27 antigen	-0.374422	1.77973e-06	8.30045e-06	DOWNinCases	0
CNTN3.20586.18	CNTN3	CNTN3	Contactin-3	-0.412924	1.8297e-06	8.52808e-06	DOWNinCases	0
DDRGK1.23559.10	DDRGK1	DDRGK	DDRGK domain-containing protein 1	-0.788255	1.83986e-06	8.56918e-06	DOWNinCases	0
HSPA1A.16780.6	HSPA1A	HSP 70	Heat shock 70 kDa protein 1A	0.601788	1.84087e-06	8.56918e-06	UPinCases	1
TRAF1.17747.45	TRAF1	TRAF1	TNF receptor-associated factor 1	-0.469452	1.84725e-06	8.59338e-06	DOWNinCases	0
TLNRD1.21172.11	TLNRD1	MESD1	Mesoderm development candidate 1	-0.599874	1.85785e-06	8.63716e-06	DOWNinCases	1
F9.5307.12	F9	Coagulation Factor IXab	Coagulation factor IXab	0.325317	1.86671e-06	8.67284e-06	UPinCases	0
GPNMB.8606.39	GPNMB	GPNMB	Transmembrane glycoprotein NMB	-0.479861	1.87007e-06	8.68289e-06	DOWNinCases	0
CLEC4C.9094.5	CLEC4C	CLC4C	C-type lectin domain family 4 member C	-0.777979	1.90812e-06	8.84827e-06	DOWNinCases	0
ETV7.24679.35	ETV7	ETV7	Transcription factor ETV7	-0.756646	1.92328e-06	8.91291e-06	DOWNinCases	0
GZMA.3440.7	GZMA	granzyme A	Granzyme A	-0.517082	1.92796e-06	8.9289e-06	DOWNinCases	0
NUB1.21996.28	NUB1	NUB1	NEDD8 ultimate buster 1	-0.717957	1.96603e-06	9.09368e-06	DOWNinCases	0
PDIA3.7832.181	PDIA3	Protein disulfide isomerase A3	Protein disulfide-isomerase A3	-1.14962	1.99326e-06	9.21375e-06	DOWNinCases	0
KITLG.9377.25	KITLG	SCF	Kit ligand	-0.463718	2.01386e-06	9.29603e-06	DOWNinCases	1
LY9.3324.51	LY9	LY9	T-lymphocyte surface antigen Ly-9	-0.604397	2.01411e-06	9.29603e-06	DOWNinCases	0
PSPC1.24948.79	PSPC1	PSPC1	Paraspeckle component 1	0.49162	2.01488e-06	9.29603e-06	UPinCases	1
UBL5.21104.37	UBL5	UBL5	Ubiquitin-like protein 5	-0.63644	2.02146e-06	9.32047e-06	DOWNinCases	0
ZNF483.23414.12	ZNF483	ZN483	Zinc finger protein 483	-0.482168	2.02985e-06	9.35323e-06	DOWNinCases	0
ENG.4908.6	ENG	Endoglin	Endoglin	-0.488526	2.05711e-06	9.47286e-06	DOWNinCases	0
ITGAL.11617.1	ITGAL	LFA-1 alpha-L chain	Integrin alpha-L	0.371835	2.06275e-06	9.4928e-06	UPinCases	0
RAF1.10001.7	RAF1	c-Raf	RAF proto-oncogene serine/threonine-protein kinase	-0.342878	2.08104e-06	9.56544e-06	DOWNinCases	0
HMOX1.17398.55	HMOX1	HO-1	Heme oxygenase 1	0.625568	2.08116e-06	9.56544e-06	UPinCases	1
PLXDC1.9235.3	PLXDC1	PXDC1	Plexin domain-containing protein 1	0.334294	2.08457e-06	9.56945e-06	UPinCases	0
GRAP.12820.1	GRAP	GRAP	GRB2-related adapter protein	-0.520728	2.08466e-06	9.56945e-06	DOWNinCases	0
NELFA.24222.10	NELFA	NELFA	Negative elongation factor A	0.458796	2.09141e-06	9.59439e-06	UPinCases	1
UGT1A1.17702.53	UGT1A1	UGT 1A1	UDP-glucuronosyltransferase 1-1	-0.365899	2.09593e-06	9.60544e-06	DOWNinCases	0
YBX1.9751.72	YBX1	NSEP1	Nuclease-sensitive element-binding protein 1	0.738742	2.09645e-06	9.60544e-06	UPinCases	1
PIH1D1.24670.1	PIH1D1	PIHD1	PIH1 domain-containing protein 1	-1.19487	2.11021e-06	9.66241e-06	DOWNinCases	0
KLK7.3378.49	KLK7	Kallikrein 7	Kallikrein-7	-0.682823	2.14144e-06	9.79923e-06	DOWNinCases	1
MMRN2.9723.105	MMRN2	EMILIN-3	Multimerin-2	-0.35497	2.17376e-06	9.93775e-06	DOWNinCases	0
LMO4.23284.5	LMO4	LMO4	LIM domain only transcription factor protein 4	-0.441793	2.17444e-06	9.93775e-06	DOWNinCases	0
DHX8.11601.26	DHX8	DHX8	ATP-dependent RNA helicase DHX8	0.371862	2.24863e-06	1.0264e-05	UPinCases	0
NTF4.4146.58	NTF4	Neurotrophin-5	Neurotrophin-4	0.45209	2.25747e-06	1.02914e-05	UPinCases	0
COMMD7.2823.7	COMMD7	COMMD7	COMM domain-containing protein 7	-0.414072	2.28486e-06	1.04098e-05	DOWNinCases	0
TYMSOS.8263.64	TYMSOS	CR056	TYMS opposite strand protein	0.332978	2.29299e-06	1.04403e-05	UPinCases	0
PMM2.17794.6	PMM2	Phosphomannomutase 2	Phosphomannomutase 2	-1.30181	2.31747e-06	1.05451e-05	DOWNinCases	0
SHBG.7909.37	SHBG	SHBG	Sex hormone-binding globulin	-0.782251	2.32005e-06	1.05464e-05	DOWNinCases	0
COX5A.18226.148	COX5A	COX5A	Cytochrome c oxidase subunit 5A, mitochondrial	-1.09925	2.32064e-06	1.05464e-05	DOWNinCases	0
OLFM2.19377.14	OLFM2	NOE2	Noelin-2	-0.481202	2.32558e-06	1.05623e-05	DOWNinCases	0
ANKRD40.23367.8	ANKRD40	ANR40	Ankyrin repeat domain-containing protein 40	-0.321964	2.35422e-06	1.0662e-05	DOWNinCases	0
LILRA5.7787.25	LILRA5	LIRA5	Leukocyte immunoglobulin-like receptor subfamily A member 5	0.553752	2.37248e-06	1.07351e-05	UPinCases	0
ARAF.12583.77	ARAF	ARAF	Serine/threonine-protein kinase A-Raf	-0.697867	2.4614e-06	1.11306e-05	DOWNinCases	0
CAPN2.14684.17	CAPN2	CAN2	Calpain-2 catalytic subunit	0.58506	2.47411e-06	1.11811e-05	UPinCases	0
HSPA1A.10803.22	HSPA1A	HSP 70	Heat shock 70 kDa protein 1A	0.612749	2.47647e-06	1.11848e-05	UPinCases	1
CDH20.21679.16	CDH20	CAD20	Cadherin-20	-0.592963	2.49415e-06	1.12577e-05	DOWNinCases	1
PRKCQ.3817.18	PRKCQ	KPCT	Protein kinase C theta type	-0.664089	2.49672e-06	1.12623e-05	DOWNinCases	0
KPNA6.13969.24	KPNA6	IMA7	Importin subunit alpha-7	-0.996556	2.54789e-06	1.1486e-05	DOWNinCases	0
RHOQ.21827.7	RHOQ	RHOQ	Rho-related GTP-binding protein RhoQ	-0.704319	2.56184e-06	1.15346e-05	DOWNinCases	0
TPSB2.3403.1	TPSB2	TPSB2	Tryptase beta-2	-0.997556	2.57196e-06	1.1573e-05	DOWNinCases	1
RDH12.21345.93	RDH12	RDH12	Retinol dehydrogenase 12	-0.638001	2.58554e-06	1.16198e-05	DOWNinCases	0
YWHAH.4707.50	YWHAH	14-3-3 eta	14-3-3 protein eta	-1.16355	2.59407e-06	1.16438e-05	DOWNinCases	0
RAB2A.16857.2	RAB2A	RAB2A	Ras-related protein Rab-2A	-0.638242	2.61841e-06	1.17458e-05	DOWNinCases	0
PRMT1.23351.59	PRMT1	ANM1	Protein arginine N-methyltransferase 1	-0.484197	2.63257e-06	1.1802e-05	DOWNinCases	0
TIMM50.7743.5	TIMM50	TIM50	Mitochondrial import inner membrane translocase subunit TIM50	-0.644199	2.63452e-06	1.18035e-05	DOWNinCases	0
ECHS1.17787.1	ECHS1	Enoyl-CoA hydratase	Enoyl-CoA hydratase, mitochondrial	-1.14799	2.69072e-06	1.20331e-05	DOWNinCases	0
DLG2.19620.16	DLG2	DLG2	Disks large homolog 2	-0.830317	2.72171e-06	1.21573e-05	DOWNinCases	0
TMCC3.8922.4	TMCC3	TMCC3	Transmembrane and coiled-coil domains protein 3	0.482672	2.72184e-06	1.21573e-05	UPinCases	0
GABARAP.17735.130	GABARAP	GBRAP	Gamma-aminobutyric acid receptor-associated protein	0.504641	2.72813e-06	1.2178e-05	UPinCases	1
HSF1.11616.9	HSF1	HSF1	Heat shock factor protein 1	0.324702	2.74307e-06	1.22297e-05	UPinCases	0
CNN2.18877.15	CNN2	CNN2	Calponin-2	-0.863596	2.7477e-06	1.22428e-05	DOWNinCases	0
TBPL1.18434.141	TBPL1	TBPL1	TATA box-binding protein-like protein 1	-0.454136	2.81594e-06	1.25392e-05	DOWNinCases	0
DDOST.17161.1	DDOST	OST48	Dolichyl-diphosphooligosaccharide--protein glycosyltransferase 48 kDa subunit	-0.558249	2.82656e-06	1.25788e-05	DOWNinCases	0
OTUD7B.21742.43	OTUD7B	OTU7B	OTU domain-containing protein 7B	-0.868097	2.83002e-06	1.25865e-05	DOWNinCases	0
ACOT8.17400.71	ACOT8	ACOT8	Acyl-coenzyme A thioesterase 8	-0.875099	2.83512e-06	1.26004e-05	DOWNinCases	0
MOB1B.19177.7	MOB1B	MOL1A	MOB kinase activator 1B	-1.18765	2.83659e-06	1.26004e-05	DOWNinCases	0
PTGES3.17154.2	PTGES3	TEBP	Prostaglandin E synthase 3	-0.415949	2.91448e-06	1.29384e-05	DOWNinCases	0
ITGA2B.ITGB3.8488.33	ITGA2B	gpIIbIIIa	Integrin alpha-IIb: beta-3 complex	-0.778058	2.95753e-06	1.31216e-05	DOWNinCases	0
TMEM70.8074.32	TMEM70	TMM70	Transmembrane protein 70, mitochondrial	0.667558	2.95947e-06	1.31222e-05	UPinCases	0
CADM1.3326.58	CADM1	Nectin-like protein 2	Cell adhesion molecule 1	-0.424976	2.967e-06	1.31476e-05	DOWNinCases	0
RAB4A.16883.57	RAB4A	RAB4A	Ras-related protein Rab-4A	-0.737801	2.98781e-06	1.32236e-05	DOWNinCases	0
RAB11B.20086.5	RAB11B	RB11B	Ras-related protein Rab-11B	-0.999482	3.00808e-06	1.32973e-05	DOWNinCases	0
GSTM5.18212.43	GSTM5	GSTM5-5	Glutathione S-transferase Mu 5	-0.330056	3.02201e-06	1.33507e-05	DOWNinCases	0
HIBCH.12396.19	HIBCH	HIBCH	3-hydroxyisobutyryl-CoA hydrolase, mitochondrial	-1.15117	3.04041e-06	1.34239e-05	DOWNinCases	0
RDH16.12881.17	RDH16	RDH16	Retinol dehydrogenase 16	-0.346201	3.04599e-06	1.34365e-05	DOWNinCases	0
TYW5.21131.109	TYW5	TYW5	tRNA wybutosine-synthesizing protein 5	-0.864426	3.04696e-06	1.34365e-05	DOWNinCases	0
TRMT112.23615.4	TRMT112	TR112	TRM112-like protein	-0.632744	3.05069e-06	1.34448e-05	DOWNinCases	0
OLFM2.8295.16	OLFM2	NOE2	Noelin-2	-0.524559	3.10317e-06	1.36479e-05	DOWNinCases	0
CD28.20521.83	CD28	CD28	CD28	-0.354211	3.10427e-06	1.36479e-05	DOWNinCases	0
MYL6.20105.7	MYL6	Myosin light polypeptide 6	Myosin light polypeptide 6	-0.606958	3.17985e-06	1.39718e-05	DOWNinCases	0
OTX2.22521.13	OTX2	OTX2	Homeobox protein OTX2	0.427742	3.19122e-06	1.40133e-05	UPinCases	0
AKR1B1.9854.36	AKR1B1	Aldose reductase	Aldose reductase	-0.905343	3.1994e-06	1.40407e-05	DOWNinCases	0
HYPK.23617.15	HYPK	HYPK	Huntingtin-interacting protein K	-0.522095	3.21266e-06	1.40905e-05	DOWNinCases	0
CACNA2D3.8885.6	CACNA2D3	CA2D3	Voltage-dependent calcium channel subunit alpha-2/delta-3	-0.358715	3.26525e-06	1.43039e-05	DOWNinCases	0
IL11RA.3814.63	IL11RA	IL-11 RA	Interleukin-11 receptor subunit alpha	-0.444417	3.28906e-06	1.43909e-05	DOWNinCases	0
BAG4.12844.10	BAG4	BAG4	BAG family molecular chaperone regulator 4	0.336677	3.30485e-06	1.44513e-05	UPinCases	0
A4GALT.8759.29	A4GALT	a1,4-Galactosyltransferase	Lactosylceramide 4-alpha-galactosyltransferase	-0.575912	3.33208e-06	1.45529e-05	DOWNinCases	0
ATP5F1B.4965.27	ATP5F1B	ATP synthase beta chain	ATP synthase subunit beta, mitochondrial	-0.467937	3.3689e-06	1.47049e-05	DOWNinCases	0
MKX.22503.24	MKX	MKX	Homeobox protein Mohawk	0.328332	3.40231e-06	1.48329e-05	UPinCases	0
RP2.23391.20	RP2	XRP2	Protein XRP2	-0.469582	3.43877e-06	1.49561e-05	DOWNinCases	0
PTX3.6447.73	PTX3	PTX3	Pentraxin-related protein PTX3	0.327162	3.46246e-06	1.50501e-05	UPinCases	0
ATP13A1.13659.36	ATP13A1	AT131	Manganese-transporting ATPase 13A1	0.332896	3.62688e-06	1.5746e-05	UPinCases	0
GOT2.23903.3	GOT2	GOT2	Aspartate aminotransferase, mitochondrial	-1.1241	3.66449e-06	1.58998e-05	DOWNinCases	0
APOM.10445.20	APOM	ApoM	Apolipoprotein M	-0.363609	3.6769e-06	1.59442e-05	DOWNinCases	0
SHARPIN.24472.28	SHARPIN	SHRPN	Sharpin	-0.793976	3.68767e-06	1.59814e-05	DOWNinCases	0
MOB1A.12426.19	MOB1A	MOL1B	MOB kinase activator 1A	-0.448966	3.74423e-06	1.62168e-05	DOWNinCases	0
COPS5.24725.4	COPS5	CSN5	COP9 signalosome complex subunit 5	-0.737244	3.7525e-06	1.6243e-05	DOWNinCases	0
MANF.9223.11	MANF	ARMET	Mesencephalic astrocyte-derived neurotrophic factor	-1.24486	3.76124e-06	1.62712e-05	DOWNinCases	0
VWF.3050.7	VWF	vWF	von Willebrand factor	0.592297	3.81354e-06	1.64779e-05	UPinCases	1
CLUAP1.23307.7	CLUAP1	CLUA1	Clusterin-associated protein 1	-0.62787	3.83237e-06	1.65494e-05	DOWNinCases	0
ABHD10.17370.186	ABHD10	ABHDA	Mycophenolic acid acyl-glucuronide esterase, mitochondrial	-1.06325	3.84883e-06	1.66106e-05	DOWNinCases	0
CIAO1.21178.8	CIAO1	CIAO1	Probable cytosolic iron-sulfur protein assembly protein CIAO1	-0.916687	3.85536e-06	1.6629e-05	DOWNinCases	0
OSBPL1A.25266.14	OSBPL1A	OSBL1	Oxysterol-binding protein-related protein 1	-0.785245	3.92031e-06	1.68991e-05	DOWNinCases	0
VSIR.11531.24	VSIR	GI24	V-type immunoglobulin domain-containing suppressor of T-cell activation	-0.875141	3.9392e-06	1.69705e-05	DOWNinCases	0
TPT1.3872.2	TPT1	TCTP	Translationally-controlled tumor protein	-1.04634	3.95668e-06	1.70357e-05	DOWNinCases	0
CACYBP.12432.23	CACYBP	CYBP	Calcyclin-binding protein	-1.14654	3.99136e-06	1.71647e-05	DOWNinCases	0
HMGCL.24211.25	HMGCL	HMGCL	Hydroxymethylglutaryl-CoA lyase, mitochondrial	-1.22965	4.01025e-06	1.72358e-05	DOWNinCases	0
PLBD1.6315.58	PLBD1	PLBL1	Phospholipase B-like 1	-0.332438	4.03572e-06	1.7335e-05	DOWNinCases	0
VEGFA.14032.2	VEGFA	VEGF121	Vascular endothelial growth factor A, isoform 121	0.667552	4.04439e-06	1.73621e-05	UPinCases	0
PCDH10.8780.2	PCDH10	PCD10	Protocadherin-10	-0.633843	4.06696e-06	1.74486e-05	DOWNinCases	0
UBE4A.25073.13	UBE4A	UBE4A	Ubiquitin conjugation factor E4 A	-0.619856	4.08653e-06	1.75223e-05	DOWNinCases	1
PKM.4240.31	PKM	M2-PK	Pyruvate kinase PKM	-1.1079	4.11071e-06	1.76156e-05	DOWNinCases	0
TIMP1.25967.34	TIMP1	TIMP-1	Metalloproteinase inhibitor 1	0.382842	4.16301e-06	1.78276e-05	UPinCases	0
SMTN.12546.1	SMTN	SMTN	Smoothelin	-0.882092	4.16508e-06	1.78276e-05	DOWNinCases	0
DUSP6.12341.8	DUSP6	DUS6	Dual specificity protein phosphatase 6	-0.35286	4.18439e-06	1.78997e-05	DOWNinCases	0
PSMC5.25456.73	PSMC5	PRS8	26S protease regulatory subunit 8	-0.669985	4.20805e-06	1.79782e-05	DOWNinCases	0
STX1A.19553.14	STX1A	STX1a	Syntaxin-1A	-0.537199	4.21014e-06	1.79782e-05	DOWNinCases	0
BMP7.2972.57	BMP7	BMP-7	Bone morphogenetic protein 7	-0.489003	4.25045e-06	1.81346e-05	DOWNinCases	1
SNRPE.21260.74	SNRPE	RUXE	Small nuclear ribonucleoprotein E	-0.391274	4.27273e-06	1.82135e-05	DOWNinCases	0
CSTL1.6368.9	CSTL1	CST1L	Cystatin-like 1	-0.981989	4.30016e-06	1.83197e-05	DOWNinCases	0
TBC1D5.9960.2	TBC1D5	TBCD5	TBC1 domain family member 5	-0.614805	4.34533e-06	1.85013e-05	DOWNinCases	0
POGLUT3.8296.117	POGLUT3	KDEL2	KDEL motif-containing protein 2	-0.935999	4.36641e-06	1.85802e-05	DOWNinCases	0
PIAS4.10342.55	PIAS4	PIAS4	E3 SUMO-protein ligase PIAS4	0.342559	4.40128e-06	1.87177e-05	UPinCases	0
HDHD2.13472.35	HDHD2	HDHD2	Haloacid dehalogenase-like hydrolase domain-containing protein 2	-0.842446	4.42984e-06	1.88281e-05	DOWNinCases	0
QSOX2.8397.147	QSOX2	QSOX2	Sulfhydryl oxidase 2	-0.399967	4.51888e-06	1.91954e-05	DOWNinCases	0
HNRNPA2B1.5351.52	HNRNPA2B1	hnRNP A2/B1	Heterogeneous nuclear ribonucleoproteins A2/B1	0.630696	4.59926e-06	1.95254e-05	UPinCases	1
PDIA6.5650.9	PDIA6	PDIA6	Protein disulfide-isomerase A6	-1.03777	4.6449e-06	1.9697e-05	DOWNinCases	0
MEP1A.19786.26	MEP1A	MEP1A	Meprin A subunit alpha	0.39271	4.68972e-06	1.98632e-05	UPinCases	0
VTI1B.8963.8	VTI1B	Vti1-rp1	Vesicle transport through interaction with t-SNAREs homolog 1B	-0.860616	4.69729e-06	1.9875e-05	DOWNinCases	0
NUDT3.12796.44	NUDT3	NUDT3	Diphosphoinositol polyphosphate phosphohydrolase 1	-0.668205	4.7007e-06	1.9875e-05	DOWNinCases	0
UNC119B.21105.23	UNC119B	U119B	Protein unc-119 homolog B	-1.25574	4.75592e-06	2.00968e-05	DOWNinCases	0
GOLM2.10613.33	GOLM2	CASC4	Protein CASC4	0.440229	4.77385e-06	2.01608e-05	UPinCases	0
SGSH.21766.50	SGSH	SPHM	N-sulphoglucosamine sulphohydrolase	-0.5495	4.86724e-06	2.05315e-05	DOWNinCases	1
TXLNA.15698.6	TXLNA	TXLNA	Alpha-taxilin	-0.706135	4.88073e-06	2.05765e-05	DOWNinCases	0
CRISPLD2.5691.2	CRISPLD2	CRLD2	Cysteine-rich secretory protein LCCL domain-containing 2	1.12446	4.91259e-06	2.06988e-05	UPinCases	0
ENPP2.16892.23	ENPP2	ENPP2	Ectonucleotide pyrophosphatase/phosphodiesterase family member 2	-0.530692	4.94297e-06	2.08148e-05	DOWNinCases	0
G3BP1.19266.35	G3BP1	G3BP1	Ras GTPase-activating protein-binding protein 1	-0.575035	4.99035e-06	2.10021e-05	DOWNinCases	0
MEMO1.19110.6	MEMO1	MEMO1	Protein MEMO1	-0.637756	5.02199e-06	2.11231e-05	DOWNinCases	0
ITGAV.ITGB6.20189.28	ITGAV	Integrin aVb6	Integrin alpha V beta 6	0.577676	5.03672e-06	2.11606e-05	UPinCases	0
TKT.4306.4	TKT	Transketolase	Transketolase	-0.633117	5.09102e-06	2.13764e-05	DOWNinCases	0
TXNDC9.23303.131	TXNDC9	TXND9	Thioredoxin domain-containing protein 9	-0.920739	5.20754e-06	2.18264e-05	DOWNinCases	0
NOTCH3.5108.72	NOTCH3	Notch-3	Neurogenic locus notch homolog protein 3	-0.42214	5.23897e-06	2.19344e-05	DOWNinCases	0
SFRP4.9284.25	SFRP4	SFRP4	Secreted frizzled-related protein 4	-0.456867	5.249e-06	2.19638e-05	DOWNinCases	1
NUDT2.16583.8	NUDT2	AP4A	Bis(5'-nucleosyl)-tetraphosphatase [asymmetrical]	-1.07229	5.2665e-06	2.20244e-05	DOWNinCases	0
GALNT16.8923.94	GALNT16	GLTL1	Polypeptide N-acetylgalactosaminyltransferase 16	-0.725322	5.27389e-06	2.20426e-05	DOWNinCases	0
IRAK4.18162.167	IRAK4	IRAK4	Interleukin-1 receptor-associated kinase 4	-0.624904	5.27801e-06	2.20472e-05	DOWNinCases	0
GSTM4.18895.54	GSTM4	GSTM4	Glutathione S-transferase Mu 4	-1.12695	5.35865e-06	2.23712e-05	DOWNinCases	0
CBX7.13027.20	CBX7	CBX7	Chromobox protein homolog 7	0.331743	5.3794e-06	2.2445e-05	UPinCases	0
IGSF3.9715.15	IGSF3	IGSF3	Immunoglobulin superfamily member 3	-0.525931	5.49083e-06	2.28968e-05	DOWNinCases	1
MED1.3892.21	MED1	MED-1	Mediator of RNA polymerase II transcription subunit 1	0.500144	5.62439e-06	2.34269e-05	UPinCases	0
DIABLO.3122.6	DIABLO	SMAC	Diablo homolog, mitochondrial	-0.371347	5.65248e-06	2.35305e-05	DOWNinCases	0
SIRT2.23031.6	SIRT2	SIRT2	NAD-dependent protein deacetylase sirtuin-2	-0.593233	5.80139e-06	2.4109e-05	DOWNinCases	0
GNS.3616.3	GNS	GNS	N-acetylglucosamine-6-sulfatase	0.411695	5.86721e-06	2.43687e-05	UPinCases	0
HRK.8008.28	HRK	HRK	Activator of apoptosis harakiri	0.384314	5.8976e-06	2.44809e-05	UPinCases	0
HEXB.15470.11	HEXB	Hexosaminidase B	Beta-hexosaminidase subunit beta	0.525367	5.91065e-06	2.45211e-05	UPinCases	1
NR0B2.22776.40	NR0B2	SHP	Nuclear receptor 0B2	-0.733296	5.9416e-06	2.46355e-05	DOWNinCases	0
FKBP14.9340.17	FKBP14	FKB14	Peptidyl-prolyl cis-trans isomerase FKBP14	-0.779785	6.28867e-06	2.60449e-05	DOWNinCases	0
TMEM132A.7871.16	TMEM132A	T132A	Transmembrane protein 132A	-0.408042	6.30169e-06	2.6084e-05	DOWNinCases	1
MSI2.21366.7	MSI2	MSI2H	RNA-binding protein Musashi homolog 2	-0.59675	6.31867e-06	2.61174e-05	DOWNinCases	0
PCSK9.8246.9	PCSK9	PCSK9	Proprotein convertase subtilisin/kexin type 9	0.516102	6.32007e-06	2.61174e-05	UPinCases	0
PROCR.24023.35	PROCR	sEPCR	soluble Endothelial protein C receptor	-0.388179	6.36823e-06	2.6288e-05	DOWNinCases	0
EMC2.20435.41	EMC2	EMC2	ER membrane protein complex subunit 2	-0.409861	6.37208e-06	2.6288e-05	DOWNinCases	0
NANS.17802.4	NANS	SIAS	Sialic acid synthase	-0.543619	6.46112e-06	2.66279e-05	DOWNinCases	0
HSPA1B.18901.26	HSPA1B	HS71B	Heat shock 70 kDa protein 1B	0.624847	6.54441e-06	2.69356e-05	UPinCases	1
TIAL1.19131.184	TIAL1	TIAR	Nucleolysin TIAR	-0.604394	6.60113e-06	2.71537e-05	DOWNinCases	0
NFKB1.9869.28	NFKB1	NF-kappa-B p105	Nuclear factor NF-kappa-B p105 subunit	-0.785456	6.6179e-06	2.72074e-05	DOWNinCases	0
MYOC.16558.2	MYOC	MYOC	Myocilin	-0.688839	6.74958e-06	2.77018e-05	DOWNinCases	1
TOMM20.20408.11	TOMM20	TOM20	Mitochondrial import receptor subunit TOM20 homolog	-0.785422	6.78365e-06	2.78259e-05	DOWNinCases	0
CREBBP.13614.6	CREBBP	CREB-binding protein	CREB-binding protein	0.402418	6.96789e-06	2.85495e-05	UPinCases	0
CAMK2D.3419.49	CAMK2D	CAMK2D	Calcium/calmodulin-dependent protein kinase type II subunit delta	-0.590167	6.9728e-06	2.85536e-05	DOWNinCases	0
PLXDC2.11342.59	PLXDC2	PXDC2	Plexin domain-containing protein 2	-0.798842	6.97817e-06	2.85595e-05	DOWNinCases	0
CAB39.17757.86	CAB39	CAB39	Calcium-binding protein 39	-1.02303	6.98233e-06	2.85605e-05	DOWNinCases	0
NSL1.22518.54	NSL1	NSL1	Kinetochore-associated protein NSL1 homolog	-0.512755	7.0042e-06	2.86339e-05	DOWNinCases	0
ADPRH.18395.5	ADPRH	ADPRH	[Protein ADP-ribosylarginine] hydrolase	0.384677	7.06746e-06	2.88601e-05	UPinCases	0
CCL23.2913.1	CCL23	MPIF-1	C-C motif chemokine 23	0.728611	7.09906e-06	2.89729e-05	UPinCases	0
PDHX.18319.7	PDHX	ODPX	Pyruvate dehydrogenase protein X component, mitochondrial	-1.08771	7.11496e-06	2.90216e-05	DOWNinCases	0
SGTA.3868.8	SGTA	SGTA	Small glutamine-rich tetratricopeptide repeat-containing protein alpha	-0.970872	7.12453e-06	2.90376e-05	DOWNinCases	0
SERPINH1.10800.15	SERPINH1	Collagen-binding protein	Serpin H1	-1.06267	7.12688e-06	2.90376e-05	DOWNinCases	0
HSPA1A.7219.152	HSPA1A	HSP 70	Heat shock 70 kDa protein 1A	0.503589	7.22159e-06	2.94071e-05	UPinCases	1
KCTD7.22485.1	KCTD7	KCTD7	BTB/POZ domain-containing protein KCTD7	-0.369068	7.25093e-06	2.95101e-05	DOWNinCases	0
JPT2.20110.25	JPT2	HN1L	Hematological and neurological expressed 1-like protein	-0.519548	7.26014e-06	2.9531e-05	DOWNinCases	0
RNASE2.8394.56	RNASE2	RNase 2	Non-secretory ribonuclease	0.479368	7.28398e-06	2.96115e-05	UPinCases	0
RPS27A.2846.24	RPS27A	Ubiquitin+1	Ubiquitin+1, truncated mutation for UbB	0.64566	7.39055e-06	3.00112e-05	UPinCases	0
ROBO1.5740.17	ROBO1	ROBO1	Roundabout homolog 1	-0.4681	7.56122e-06	3.06872e-05	DOWNinCases	1
IL1RN.5353.89	IL1RN	IL-1Ra	Interleukin-1 receptor antagonist protein	0.674822	7.6261e-06	3.09161e-05	UPinCases	1
HSD17B10.4217.49	HSD17B10	ERAB	3-hydroxyacyl-CoA dehydrogenase type-2	-1.16406	7.72805e-06	3.13119e-05	DOWNinCases	0
CXCL6.3495.15	CXCL6	GCP-2	C-X-C motif chemokine 6	-0.729195	7.74302e-06	3.13551e-05	DOWNinCases	0
FLNA.11171.25	FLNA	filamin A	Filamin-A	-0.837932	7.76533e-06	3.13983e-05	DOWNinCases	0
ACOT12.23601.43	ACOT12	ACO12	Acyl-coenzyme A thioesterase 12	-0.326412	7.76661e-06	3.13983e-05	DOWNinCases	0
DMRTC2.22369.12	DMRTC2	DMRTD	Doublesex- and mab-3-related transcription factor C2	-0.417996	7.80206e-06	3.15241e-05	DOWNinCases	0
ELMO2.25061.8	ELMO2	ELMO2	Engulfment and cell motility protein 2	-0.63279	7.82509e-06	3.15996e-05	DOWNinCases	0
KCNRG.23336.2	KCNRG	KCNRG	Putative potassium channel regulatory protein	-0.447677	7.88426e-06	3.1821e-05	DOWNinCases	0
PCYOX1.6431.68	PCYOX1	PCYOX	Prenylcysteine oxidase 1	-0.498126	7.90872e-06	3.1902e-05	DOWNinCases	1
F11.2190.55	F11	Coagulation Factor XI	Coagulation Factor XI	0.373507	8.02119e-06	3.23199e-05	UPinCases	0
KPNA1.19587.12	KPNA1	IMA5	Importin subunit alpha-5	-0.511663	8.08255e-06	3.25491e-05	DOWNinCases	0
KLK10.6227.1	KLK10	kallikrein 10	Kallikrein-10	-0.785936	8.11598e-06	3.26657e-05	DOWNinCases	0
CRP.4337.49	CRP	CRP	C-reactive protein	0.833942	8.24304e-06	3.31588e-05	UPinCases	1
MRPL10.22554.101	MRPL10	RM10	39S ribosomal protein L10, mitochondrial	-0.863662	8.24813e-06	3.31609e-05	DOWNinCases	0
ASL.11241.8	ASL	ARLY	Argininosuccinate lyase	0.888034	8.35275e-06	3.35261e-05	UPinCases	0
FOXP4.24259.24	FOXP4	FOXP4	Forkhead box protein P4	-0.684983	8.47118e-06	3.39827e-05	DOWNinCases	0
PEX14.8300.82	PEX14	PEX14	Peroxisomal membrane protein PEX14	-0.724841	8.54432e-06	3.42572e-05	DOWNinCases	0
A2M.3708.62	A2M	a2-Macroglobulin	Alpha-2-macroglobulin	-0.447658	8.6123e-06	3.44729e-05	DOWNinCases	1
ATP5PF.7788.1	ATP5PF	CF6	ATP synthase-coupling factor 6, mitochondrial	-0.921653	8.62324e-06	3.44977e-05	DOWNinCases	0
HSPE1.17150.8	HSPE1	HSP 10	10 kDa heat shock protein, mitochondrial	-0.931418	8.6546e-06	3.45777e-05	DOWNinCases	0
F3.4931.59	F3	TF	Tissue Factor	0.468277	8.65748e-06	3.45777e-05	UPinCases	0
RAD23B.12522.6	RAD23B	RD23B	UV excision repair protein RAD23 homolog B	-0.592395	8.73732e-06	3.48775e-05	DOWNinCases	0
DDX1.25092.32	DDX1	DDX1	ATP-dependent RNA helicase DDX1	-0.971412	8.74949e-06	3.48958e-05	DOWNinCases	0
SERPINA1.3580.25	SERPINA1	a1-Antitrypsin	Alpha-1-antitrypsin	0.37302	8.75149e-06	3.48958e-05	UPinCases	0
HGFAC.3617.80	HGFAC	HGFA	Hepatocyte growth factor activator	-0.816184	8.76875e-06	3.49455e-05	DOWNinCases	1
SYNCRIP.4224.7	SYNCRIP	HNRPQ	Heterogeneous nuclear ribonucleoprotein Q	-0.57176	8.93656e-06	3.55559e-05	DOWNinCases	0
TWF1.12871.10	TWF1	TWF1	Twinfilin-1	-0.564393	8.94811e-06	3.55824e-05	DOWNinCases	0
PLAC8L1.22532.59	PLAC8L1	PL8L1	PLAC8-like protein 1	-0.43281	8.97645e-06	3.56756e-05	DOWNinCases	0
EGF.11949.25	EGF	EGF	Epidermal growth factor	-0.433494	9.0626e-06	3.59592e-05	DOWNinCases	0
PPIL1.9884.8	PPIL1	PPIL1	Peptidyl-prolyl cis-trans isomerase-like 1	-0.524818	9.30052e-06	3.6863e-05	DOWNinCases	0
WWP2.21670.52	WWP2	WWP2	NEDD4-like E3 ubiquitin-protein ligase WWP2	-0.355916	9.32393e-06	3.69358e-05	DOWNinCases	0
HSPA1A.10749.18	HSPA1A	HSP 70	Heat shock 70 kDa protein 1A	0.602825	9.50158e-06	3.7619e-05	UPinCases	1
GRAMD1C.8842.16	GRAMD1C	GRM1C	GRAM domain-containing protein 1C	0.404729	9.5855e-06	3.79307e-05	UPinCases	0
ZRANB1.21754.5	ZRANB1	ZRAN1	Ubiquitin thioesterase ZRANB1	-0.561789	9.83591e-06	3.88944e-05	DOWNinCases	0
CBLN1.9313.27	CBLN1	CBLN1	Cerebellin-1	-0.589249	9.83973e-06	3.88944e-05	DOWNinCases	0
ABRAXAS2.8945.7	ABRAXAS2	F175B	BRISC complex subunit Abro1	-0.343445	9.89114e-06	3.90586e-05	DOWNinCases	0
MVP.24911.57	MVP	LRP	LRP	-0.925384	9.89198e-06	3.90586e-05	DOWNinCases	0
SERPINB8.19130.81	SERPINB8	SPB8	Serpin B8	0.457009	1.0338e-05	4.07314e-05	UPinCases	1
SERPINA10.6583.67	SERPINA10	protein Z inhibitor	Protein Z-dependent protease inhibitor	0.356962	1.05478e-05	4.14461e-05	UPinCases	0
LCK.4560.34	LCK	LCK	Tyrosine-protein kinase Lck	-0.458586	1.06203e-05	4.1686e-05	DOWNinCases	0
MAX.12411.60	MAX	MAX	Protein max	-1.05388	1.06391e-05	4.17372e-05	DOWNinCases	0
RAN.4282.3	RAN	RAN	GTP-binding nuclear protein Ran	-1.10379	1.06852e-05	4.18709e-05	DOWNinCases	0
IL18R1.3446.7	IL18R1	IL-18 Ra	Interleukin-18 receptor 1	0.521422	1.06904e-05	4.18709e-05	UPinCases	1
NONO.24910.18	NONO	NonO protein	Non-POU domain-containing octamer-binding protein	-0.545625	1.07642e-05	4.21145e-05	DOWNinCases	0
SKIL.14670.1	SKIL	SKIL	Ski-like protein	-0.477886	1.09581e-05	4.28272e-05	DOWNinCases	0
CAMK2B.3351.1	CAMK2B	CAMK2B	Calcium/calmodulin-dependent protein kinase type II subunit beta	-0.71151	1.11003e-05	4.33365e-05	DOWNinCases	0
MUC1.10623.19	MUC1	MUC1	Mucin-1	0.865112	1.11427e-05	4.34786e-05	UPinCases	1
CSNK2A2.CSNK2B.5226.36	CSNK2A2	CK2-A2:B	Casein kinase II 2-alpha':2-beta heterotetramer	-0.932362	1.13189e-05	4.40953e-05	DOWNinCases	0
LANCL1.13986.6	LANCL1	LANC1	LanC-like protein 1	-0.733219	1.13419e-05	4.41614e-05	DOWNinCases	0
RAP1GAP.13735.1	RAP1GAP	RPGP1	Rap1 GTPase-activating protein 1	-0.433836	1.13557e-05	4.41913e-05	DOWNinCases	0
YWHAB.14156.33	YWHAB	14-3-3 protein beta/alpha	14-3-3 protein beta/alpha	-0.970782	1.14189e-05	4.44137e-05	DOWNinCases	0
MAPK10.15418.25	MAPK10	MK10	Mitogen-activated protein kinase 10	-1.17933	1.15208e-05	4.47862e-05	DOWNinCases	0
BCHE.8239.223	BCHE	Pseudocholinesterase	Cholinesterase	-0.487759	1.16288e-05	4.51819e-05	DOWNinCases	1
CLIC4.12491.23	CLIC4	CLIC4	Chloride intracellular channel protein 4	-1.08423	1.16705e-05	4.52956e-05	DOWNinCases	0
SMPD1.10818.36	SMPD1	ASM	Sphingomyelin phosphodiesterase	0.513292	1.18613e-05	4.59871e-05	UPinCases	0
STAMBP.19187.21	STAMBP	STABP	STAM-binding protein	-0.453647	1.19325e-05	4.62384e-05	DOWNinCases	0
HS6ST1.5465.32	HS6ST1	H6ST1	Heparan-sulfate 6-O-sulfotransferase 1	0.340945	1.21698e-05	4.7083e-05	UPinCases	1
HS2ST1.21736.60	HS2ST1	HS2ST	Heparan sulfate 2-O-sulfotransferase 1	-0.524795	1.21772e-05	4.70866e-05	DOWNinCases	0
TFB2M.21193.1	TFB2M	TFB2M	Dimethyladenosine transferase 2, mitochondrial	-0.671871	1.22541e-05	4.73336e-05	DOWNinCases	0
NMS.9503.1	NMS	NMS	Neuromedin-S	-0.436426	1.2317e-05	4.75513e-05	DOWNinCases	0
QPCT.7849.3	QPCT	Glutaminyl cyclase	Glutaminyl-peptide cyclotransferase	-0.536837	1.24908e-05	4.81966e-05	DOWNinCases	1
NCAM2.6507.16	NCAM2	NCAM2	Neural cell adhesion molecule 2	-0.464402	1.26259e-05	4.86533e-05	DOWNinCases	0
None.23424.4	None	ANR63	Ankyrin repeat domain-containing protein 63	-0.688706	1.26291e-05	4.86533e-05	DOWNinCases	1
ITIH3.7145.1	ITIH3	ITIH3	Inter-alpha-trypsin inhibitor heavy chain H3	0.509376	1.26633e-05	4.87592e-05	UPinCases	0
THAP11.22805.18	THAP11	THA11	THAP domain-containing protein 11	-0.412924	1.28164e-05	4.93224e-05	DOWNinCases	0
NEGR1.13109.82	NEGR1	NEGR1	Neuronal growth regulator 1	-0.377297	1.29584e-05	4.98162e-05	DOWNinCases	0
TNFRSF13C.5383.14	TNFRSF13C	BAFF Receptor	Tumor necrosis factor receptor superfamily member 13C	-0.573516	1.29781e-05	4.98525e-05	DOWNinCases	0
CCL5.2523.31	CCL5	RANTES	C-C motif chemokine 5	-0.63495	1.29883e-05	4.98525e-05	DOWNinCases	0
PAPOLG.8343.224	PAPOLG	PAPOG	Poly(A) polymerase gamma	-0.575711	1.30156e-05	4.99161e-05	DOWNinCases	0
PLTP.6263.77	PLTP	PLTP	Phospholipid transfer protein	0.33677	1.30203e-05	4.99161e-05	UPinCases	0
GP5.7185.29	GP5	GPV	Platelet glycoprotein V	-0.56407	1.30255e-05	4.99161e-05	DOWNinCases	1
AKR1B1.16606.85	AKR1B1	Aldose reductase	Aldose reductase	-0.620384	1.30435e-05	4.99588e-05	DOWNinCases	0
SCGB3A1.6252.62	SCGB3A1	Secretoglobin family 3A member 1	Secretoglobin family 3A member 1	-1.16879	1.30721e-05	5.00423e-05	DOWNinCases	1
DCTPP1.4314.12	DCTPP1	XTP3A	dCTP pyrophosphatase 1	0.527386	1.31918e-05	5.04208e-05	UPinCases	1
RMDN1.7096.30	RMDN1	RMD1	Regulator of microtubule dynamics protein 1	-0.789069	1.33041e-05	5.08234e-05	DOWNinCases	0
RAB14.14283.12	RAB14	RAB14	Ras-related protein Rab-14	-0.385671	1.33442e-05	5.09501e-05	DOWNinCases	0
SUMO3.14623.26	SUMO3	SUMO3	Small ubiquitin-related modifier 3	-0.648168	1.36577e-05	5.21197e-05	DOWNinCases	0
PPID.5202.4	PPID	PPID	Peptidyl-prolyl cis-trans isomerase D	-1.21774	1.37e-05	5.22538e-05	DOWNinCases	0
CNOT1.13482.14	CNOT1	CNOT1	CCR4-NOT transcription complex subunit 1	-0.649564	1.37389e-05	5.23474e-05	DOWNinCases	0
INPP4A.25064.34	INPP4A	INP4A	Type I inositol-3,4-bisphosphate 4-phosphatase	-0.759266	1.38215e-05	5.26068e-05	DOWNinCases	0
MSMP.8080.24	MSMP	PSMP	Prostate-associated microseminoprotein	-0.803146	1.38307e-05	5.26146e-05	DOWNinCases	1
POLR1C.12939.1	POLR1C	RPAC1	DNA-directed RNA polymerases I and III subunit RPAC1	-0.327972	1.39251e-05	5.29461e-05	DOWNinCases	0
MIF.8221.19	MIF	MIF	Macrophage migration inhibitory factor	-0.800242	1.40894e-05	5.35146e-05	DOWNinCases	0
MITF.22383.21	MITF	MITF	MITF	-0.774609	1.40978e-05	5.35188e-05	DOWNinCases	0
PTPRD.9296.15	PTPRD	PTPRD	Receptor-type tyrosine-protein phosphatase delta	-0.479561	1.43429e-05	5.4421e-05	DOWNinCases	1
OXSM.18271.43	OXSM	OXSM	3-oxoacyl-[acyl-carrier-protein] synthase, mitochondrial	-1.00522	1.43945e-05	5.45882e-05	DOWNinCases	0
SNX11.24685.12	SNX11	SNX11	Sorting nexin-11	-0.79469	1.44725e-05	5.48271e-05	DOWNinCases	0
TMEM132C.7173.141	TMEM132C	T132C	Transmembrane protein 132C	-0.531304	1.45781e-05	5.51982e-05	DOWNinCases	1
BIRC2.21464.2	BIRC2	cIAP-1	Baculoviral IAP repeat-containing protein 2	-0.416237	1.46239e-05	5.53427e-05	DOWNinCases	0
APOD.4712.28	APOD	Apo D	Apolipoprotein D	0.416377	1.47484e-05	5.57851e-05	UPinCases	0
STX1A.3766.51	STX1A	STX1a	Syntaxin-1A	0.416026	1.47727e-05	5.58482e-05	UPinCases	0
IGLON5.6478.2	IGLON5	IGLO5	IgLON family member 5	-0.409813	1.48168e-05	5.59857e-05	DOWNinCases	0
PGRMC1.7863.50	PGRMC1	PGRC1	Membrane-associated progesterone receptor component 1	-0.566067	1.48851e-05	5.62146e-05	DOWNinCases	0
KRT1.9931.20	KRT1	Keratin-1	Keratin, type II cytoskeletal 1	0.641091	1.49578e-05	5.646e-05	UPinCases	0
PRR16.10621.26	PRR16	PRR16	Protein Largen	-0.492532	1.50851e-05	5.69107e-05	DOWNinCases	0
TPP1.17691.1	TPP1	TPP1	Tripeptidyl-peptidase 1	0.390053	1.51694e-05	5.71994e-05	UPinCases	0
MRRF.12355.223	MRRF	RRFM	Ribosome-recycling factor, mitochondrial	-0.418552	1.5558e-05	5.86343e-05	DOWNinCases	0
ENPP5.6556.5	ENPP5	ENPP5	Ectonucleotide pyrophosphatase/phosphodiesterase family member 5	-0.386493	1.56048e-05	5.87802e-05	DOWNinCases	0
S100A13.7223.60	S100A13	S100A13	Protein S100-A13	0.811595	1.59946e-05	6.01863e-05	UPinCases	1
ICOSLG.5061.27	ICOSLG	B7-H2	ICOS ligand	-0.663415	1.60354e-05	6.03087e-05	DOWNinCases	0
IAPP.19639.53	IAPP	IAPP	Islet amyloid polypeptide	-0.455216	1.62043e-05	6.08498e-05	DOWNinCases	1
ERN1.11229.16	ERN1	ERN1	Serine/threonine-protein kinase/endoribonuclease IRE1	-0.484709	1.63013e-05	6.11822e-05	DOWNinCases	0
REG3A.9277.16	REG3A	PAP1	Regenerating islet-derived protein 3-alpha	-0.468197	1.63436e-05	6.1278e-05	DOWNinCases	0
SIRT3.17495.141	SIRT3	SIR3	NAD-dependent protein deacetylase sirtuin-3, mitochondrial	-0.398869	1.641e-05	6.14955e-05	DOWNinCases	0
PRG3.9015.1	PRG3	PRG3	Proteoglycan 3	-0.388605	1.66208e-05	6.22241e-05	DOWNinCases	0
DBT.23673.9	DBT	ODB2	Lipoamide acyltransferase component of branched-chain alpha-keto acid dehydrogenase complex, mitochondrial	-0.937107	1.66498e-05	6.22977e-05	DOWNinCases	0
OAT.20237.38	OAT	OAT	Ornithine aminotransferase, mitochondrial	0.398506	1.67086e-05	6.24858e-05	UPinCases	1
PTGES2.18458.4	PTGES2	PGES2	Prostaglandin E synthase 2	-0.67759	1.67913e-05	6.27629e-05	DOWNinCases	0
ASNS.23694.3	ASNS	ASNS	Asparagine synthetase	-0.419889	1.69139e-05	6.31238e-05	DOWNinCases	0
GSTP1.4911.49	GSTP1	Glutathione S-transferase Pi	Glutathione S-transferase P	-0.461779	1.69647e-05	6.32811e-05	DOWNinCases	0
STX10.12842.43	STX10	STX10	Syntaxin-10	-0.37747	1.711e-05	6.37577e-05	DOWNinCases	0
TBCA.12501.10	TBCA	TBCA	Tubulin-specific chaperone A	0.555946	1.72509e-05	6.42172e-05	UPinCases	0
FCRL1.5728.60	FCRL1	FCRL1	Fc receptor-like protein 1	-0.540425	1.74119e-05	6.47835e-05	DOWNinCases	0
HNRNPR.13504.147	HNRNPR	HNRPR	Heterogeneous nuclear ribonucleoprotein R	-0.685472	1.75253e-05	6.51388e-05	DOWNinCases	0
GCH1.11185.145	GCH1	GCH1	GTP cyclohydrolase 1	0.402432	1.78051e-05	6.61448e-05	UPinCases	0
COLEC12.5457.5	COLEC12	COLEC12	Collectin-12	-0.454831	1.79151e-05	6.65198e-05	DOWNinCases	1
F2.4157.2	F2	Thrombin	Thrombin	-0.65075	1.79312e-05	6.65455e-05	DOWNinCases	1
MARK3.9747.48	MARK3	MARK3	MAP/microtubule affinity-regulating kinase 3	-0.437615	1.81994e-05	6.75066e-05	DOWNinCases	0
PPIE.5238.26	PPIE	PPIE	Peptidyl-prolyl cis-trans isomerase E	-0.734608	1.83351e-05	6.79752e-05	DOWNinCases	0
NAE1.18177.49	NAE1	ULA1	NEDD8-activating enzyme E1 regulatory subunit	-0.343864	1.83904e-05	6.81455e-05	DOWNinCases	0
USO1.13639.101	USO1	USO1	General vesicular transport factor p115	-0.694239	1.84135e-05	6.81963e-05	DOWNinCases	0
PHF11.22528.1	PHF11	PHF11	PHD finger protein 11	-0.347976	1.87551e-05	6.93558e-05	DOWNinCases	0
ECI2.12859.33	ECI2	PECI	Enoyl-CoA delta isomerase 2, mitochondrial	-0.911999	1.87677e-05	6.93671e-05	DOWNinCases	0
SARS2.12348.46	SARS2	SYSM	Serine--tRNA ligase, mitochondrial	-0.819132	1.87821e-05	6.93853e-05	DOWNinCases	0
CD209.3029.52	CD209	DC-SIGN	CD209 antigen	-0.589666	1.91656e-05	7.06946e-05	DOWNinCases	0
HDGF.16758.96	HDGF	HDGF	Hepatoma-derived growth factor	0.522886	1.91857e-05	7.07327e-05	UPinCases	0
IL18R1.14079.14	IL18R1	IL-18 Ra	Interleukin-18 receptor 1	0.56609	1.93494e-05	7.13003e-05	UPinCases	1
ANKRD16.24720.10	ANKRD16	ANR16	Ankyrin repeat domain-containing protein 16	-0.540569	1.94227e-05	7.15339e-05	DOWNinCases	0
KIR2DS2.10428.1	KIR2DS2	KI2S2	Killer cell immunoglobulin-like receptor 2DS2	-0.760914	1.94593e-05	7.1597e-05	DOWNinCases	0
LYRM1.22496.21	LYRM1	LYRM1	LYR motif-containing protein 1	-0.389613	1.94595e-05	7.1597e-05	DOWNinCases	0
STAT5A.20225.119	STAT5A	STA5A	Signal transducer and activator of transcription 5A	-0.443923	1.95727e-05	7.19497e-05	DOWNinCases	0
PTEN.3831.21	PTEN	pTEN	Phosphatidylinositol 3,4,5-trisphosphate 3-phosphatase and dual-specificity protein phosphatase PTEN	-0.5746	1.95799e-05	7.19497e-05	DOWNinCases	0
NAIF1.18301.10	NAIF1	NAIF1	Nuclear apoptosis-inducing factor 1	-0.715405	1.95849e-05	7.19497e-05	DOWNinCases	0
EVL.11656.110	EVL	EVL	Ena/VASP-like protein	-0.394892	1.96618e-05	7.21958e-05	DOWNinCases	0
CDC37.3879.50	CDC37	CDC37	Hsp90 co-chaperone Cdc37	-0.624165	1.9691e-05	7.22665e-05	DOWNinCases	0
POLR2I.19809.47	POLR2I	RPB9	DNA-directed RNA polymerase II subunit RPB9	0.391548	1.97913e-05	7.25613e-05	UPinCases	0
MRAS.18297.8	MRAS	RASM	Ras-related protein M-Ras	0.357821	1.99009e-05	7.289e-05	UPinCases	0
USP46.WDR48.21748.36	USP46	UBP46/WDR48 Complex	UBP46/WDR48 Complex	-0.50956	1.99706e-05	7.31085e-05	DOWNinCases	0
LPO.4801.13	LPO	PERL	Lactoperoxidase	0.559483	2.00413e-05	7.33306e-05	UPinCases	0
ARF1.19239.5	ARF1	ARF1	ADP-ribosylation factor 1	-0.418711	2.02891e-05	7.41998e-05	DOWNinCases	0
PLAT.2212.69	PLAT	tPA	Tissue-type plasminogen activator	0.594904	2.0371e-05	7.44622e-05	UPinCases	1
UBA2.12500.88	UBA2	SAE2	SUMO-activating enzyme subunit 2	-0.435513	2.07075e-05	7.55782e-05	DOWNinCases	0
CLMP.9585.80	CLMP	ACAM	CXADR-like membrane protein	0.401388	2.09788e-05	7.64533e-05	UPinCases	0
MRAP2.10889.2	MRAP2	MRAP2	Melanocortin-2 receptor accessory protein 2	-0.759046	2.12189e-05	7.72897e-05	DOWNinCases	0
CAPN1.CAPNS1.2668.70	CAPN1	Calpain I	Calpain I	-0.584262	2.16973e-05	7.89347e-05	DOWNinCases	0
BRAF.15669.7	BRAF	BRAF1	Serine/threonine-protein kinase B-raf	-0.536879	2.1703e-05	7.89347e-05	DOWNinCases	0
AGO1.15312.14	AGO1	AGO1	Protein argonaute-1	-0.871059	2.17942e-05	7.91481e-05	DOWNinCases	0
GUK1.17325.10	GUK1	KGUA	Guanylate kinase	-0.632655	2.18197e-05	7.91858e-05	DOWNinCases	0
C1orf226.7989.5	C1orf226	CA226	Uncharacterized protein C1orf226	0.524399	2.18314e-05	7.91858e-05	UPinCases	1
PIK3CG.3391.10	PIK3CG	PK3CG	Phosphatidylinositol 4,5-bisphosphate 3-kinase catalytic subunit gamma isoform	-0.378255	2.18372e-05	7.91858e-05	DOWNinCases	0
LRFN2.7200.4	LRFN2	LRFN2	Leucine-rich repeat and fibronectin type-III domain-containing protein 2	-0.735075	2.19356e-05	7.94889e-05	DOWNinCases	0
CD177.13116.25	CD177	CD177	CD177 antigen	1.03078	2.19426e-05	7.94889e-05	UPinCases	0
AIFM1.9522.3	AIFM1	AIF	Apoptosis-inducing factor 1, mitochondrial	-0.56651	2.20088e-05	7.96891e-05	DOWNinCases	0
HSPA1A.10721.76	HSPA1A	HSP 70	Heat shock 70 kDa protein 1A	0.483888	2.2037e-05	7.97514e-05	UPinCases	0
MBD1.14294.61	MBD1	MBD1	Methyl-CpG-binding domain protein 1	-0.610345	2.21227e-05	8.00218e-05	DOWNinCases	0
SHC1.16043.30	SHC1	SHC1	SHC-transforming protein 1	-0.718569	2.2179e-05	8.01858e-05	DOWNinCases	0
DUSP13.6525.17	DUSP13	DUSP13	Dual specificity protein phosphatase 13 isoform A	-0.563596	2.22806e-05	8.05132e-05	DOWNinCases	0
LILRB5.7015.8	LILRB5	LIRB5	Leukocyte immunoglobulin-like receptor subfamily B member 5	-0.57667	2.23851e-05	8.08506e-05	DOWNinCases	0
CHMP6.21160.4	CHMP6	CHMP6	Charged multivesicular body protein 6	-0.618794	2.24528e-05	8.10147e-05	DOWNinCases	0
PPM1F.23923.26	PPM1F	PPM1F	Protein phosphatase 1F	-0.917657	2.26353e-05	8.15924e-05	DOWNinCases	0
TPP2.25050.82	TPP2	TPP2	Tripeptidyl-peptidase 2	-0.854192	2.28506e-05	8.23278e-05	DOWNinCases	0
QTRT1.21380.77	QTRT1	TGT	Queuine tRNA-ribosyltransferase	-0.327195	2.29066e-05	8.24887e-05	DOWNinCases	0
POLR2E.20441.35	POLR2E	RPAB1	DNA-directed RNA polymerases I, II, and III subunit RPABC1	-0.617847	2.32325e-05	8.35385e-05	DOWNinCases	0
USP21.12681.63	USP21	UBP21	Ubiquitin carboxyl-terminal hydrolase 21	-0.429304	2.35421e-05	8.45681e-05	DOWNinCases	0
DDX46.14216.35	DDX46	DDX46	Probable ATP-dependent RNA helicase DDX46	-0.343771	2.35796e-05	8.46131e-05	DOWNinCases	0
NMES1.6406.3	NMES1	NMES1	Normal mucosa of esophagus-specific gene 1 protein	-0.448947	2.35895e-05	8.46131e-05	DOWNinCases	0
PCSK9.5231.79	PCSK9	PCSK9	Proprotein convertase subtilisin/kexin type 9	0.390281	2.36445e-05	8.47687e-05	UPinCases	0
GARS1.21351.8	GARS1	Glycyl t-RNA synthetase	Glycyl t-RNA synthetase	-1.00283	2.36565e-05	8.47703e-05	DOWNinCases	0
DEFB132.9022.49	DEFB132	DB132	Beta-defensin 132	-0.430131	2.40489e-05	8.60916e-05	DOWNinCases	0
KLK3.8468.19	KLK3	PSA	Prostate-specific antigen	0.458949	2.41942e-05	8.65692e-05	UPinCases	0
TNFAIP8.12563.2	TNFAIP8	TFIP8	Tumor necrosis factor alpha-induced protein 8	-0.731995	2.43262e-05	8.69986e-05	DOWNinCases	0
EIF3J.13497.34	EIF3J	EIF3J	Eukaryotic translation initiation factor 3 subunit J	-0.711472	2.45477e-05	8.77477e-05	DOWNinCases	0
GPX7.8345.27	GPX7	GPX7	Glutathione peroxidase 7	-0.571004	2.51094e-05	8.95799e-05	DOWNinCases	0
CAMLG.21140.19	CAMLG	CAMLG	Calcium signal-modulating cyclophilin ligand	-0.754939	2.53831e-05	9.04234e-05	DOWNinCases	0
C15orf40.24247.13	C15orf40	CO040	UPF0235 protein C15orf40	-0.532282	2.60413e-05	9.27229e-05	DOWNinCases	0
FAM219B.25260.62	FAM219B	CO017	Uncharacterized protein C15orf17	-0.376738	2.63111e-05	9.35921e-05	DOWNinCases	0
ARL5B.17404.5	ARL5B	ARL5B	ADP-ribosylation factor-like protein 5B	0.389407	2.65767e-05	9.44444e-05	UPinCases	0
MTHFSD.19129.15	MTHFSD	MTHFSD	Methenyltetrahydrofolate synthase domain-containing protein	-0.474904	2.6595e-05	9.44636e-05	DOWNinCases	0
FKBP7.9288.7	FKBP7	FKBP7	Peptidyl-prolyl cis-trans isomerase FKBP7	-0.66077	2.66393e-05	9.45749e-05	DOWNinCases	0
SPINK5.8028.22	SPINK5	SPINK5	Serine protease inhibitor Kazal-type 5	-0.436006	2.66572e-05	9.4592e-05	DOWNinCases	0
PIK3C3.25947.116	PIK3C3	PK3C3	Phosphatidylinositol 3-kinase catalytic subunit type 3	-0.395281	2.67743e-05	9.49154e-05	DOWNinCases	0
CHCHD10.11270.17	CHCHD10	CHC10	Coiled-coil-helix-coiled-coil-helix domain-containing protein 10, mitochondrial	0.488283	2.67877e-05	9.49167e-05	UPinCases	0
NPPC.20430.8	NPPC	Natriuretic Peptide C-Type	C-type natriuretic peptide	0.326753	2.68789e-05	9.51935e-05	UPinCases	0
GP6.3194.36	GP6	GPVI	Platelet glycoprotein VI	-0.778527	2.71253e-05	9.60193e-05	DOWNinCases	0
HSPA8.5903.91	HSPA8	HSP70 protein 8	Heat shock cognate 71 kDa protein	0.445439	2.74726e-05	9.71543e-05	UPinCases	1
DECR2.18343.10	DECR2	DECR2	Peroxisomal 2,4-dienoyl-CoA reductase	-0.655317	2.77319e-05	9.80236e-05	DOWNinCases	0
HAVCR2.5134.52	HAVCR2	TIMD3	Hepatitis A virus cellular receptor 2	0.447103	2.78413e-05	9.83628e-05	UPinCases	1
BAG6.21955.36	BAG6	BAT3	Large proline-rich protein BAT3	-0.461467	2.80029e-05	9.88855e-05	DOWNinCases	0
FAM118A.23358.42	FAM118A	F118A	Protein FAM118A	-0.41023	2.80629e-05	9.90495e-05	DOWNinCases	1
SLPI.4413.3	SLPI	SLPI	Antileukoproteinase	0.364349	2.81018e-05	9.91388e-05	UPinCases	0
CRK.4976.57	CRK	CRK	Adapter molecule crk	-0.582524	2.8148e-05	9.92539e-05	DOWNinCases	0
SSU72.13566.2	SSU72	SSU72	RNA polymerase II subunit A C-terminal domain phosphatase SSU72	-0.543543	2.8302e-05	9.97485e-05	DOWNinCases	0
C4BPA.9449.150	C4BPA	C4b-binding protein alpha chain	C4b-binding protein alpha chain	0.331844	2.83442e-05	9.98053e-05	UPinCases	0
CYB5D2.10924.258	CYB5D2	NEUFC	Neuferricin	-0.37562	2.83947e-05	9.99079e-05	DOWNinCases	0
NDUFAF2.21120.3	NDUFAF2	MIMIT	Mimitin, mitochondrial	-1.14411	2.84021e-05	9.99079e-05	DOWNinCases	0
TPM2.4472.5	TPM2	Tropomyosin 2	Tropomyosin beta chain	-0.484157	2.85127e-05	0.000100249	DOWNinCases	0
S100A6.13090.17	S100A6	S100A6	Protein S100-A6	0.560612	2.92571e-05	0.000102816	UPinCases	0
CXCL3.2986.49	CXCL3	Gro-g	Gro-gamma	-0.942384	2.94772e-05	0.00010354	DOWNinCases	0
PDK1.5227.60	PDK1	PDK1	[Pyruvate dehydrogenase (acetyl-transferring)] kinase isozyme 1, mitochondrial	-0.7352	2.97977e-05	0.000104514	DOWNinCases	0
NRBF2.21367.63	NRBF2	NRBF2	Nuclear receptor-binding factor 2	-0.594363	3.00228e-05	0.000105253	DOWNinCases	0
ALDH7A1.21498.3	ALDH7A1	AL7A1	Alpha-aminoadipic semialdehyde dehydrogenase	0.438086	3.02972e-05	0.000106164	UPinCases	0
PCTP.23318.60	PCTP	PPCT	Phosphatidylcholine transfer protein	-0.638907	3.05737e-05	0.000107081	DOWNinCases	0
MMP9.2579.17	MMP9	MMP-9	Matrix metalloproteinase-9	0.913488	3.05923e-05	0.000107095	UPinCases	0
LGALS9.9197.4	LGALS9	LEG9	Galectin-9	0.406259	3.08744e-05	0.000107979	UPinCases	1
MMAB.17783.9	MMAB	MMAB	Cob(I)yrinic acid a,c-diamide adenosyltransferase, mitochondrial	-0.869325	3.12748e-05	0.000109327	DOWNinCases	0
GZMB.4133.54	GZMB	Granzyme B	Granzyme B	0.334571	3.15052e-05	0.000110079	UPinCases	0
MRPL55.11135.5	MRPL55	RM55	39S ribosomal protein L55, mitochondrial	-1.07399	3.19378e-05	0.00011143	DOWNinCases	0
SLC26A7.13979.3	SLC26A7	S26A7	Anion exchange transporter	0.345494	3.23273e-05	0.000112628	UPinCases	0
FAM221A.24447.26	FAM221A	F221A	Protein FAM221A	-0.766141	3.29811e-05	0.000114686	DOWNinCases	1
CTNNB1.9842.2	CTNNB1	b-Catenin	Catenin beta-1	-0.676018	3.41725e-05	0.000118546	DOWNinCases	0
TREM2.16300.4	TREM2	TREM2	Triggering receptor expressed on myeloid cells 2	-0.53796	3.46806e-05	0.000120194	DOWNinCases	0
NLGN4X.5357.60	NLGN4X	NLGNX	Neuroligin-4, X-linked	0.345157	3.50313e-05	0.000121294	UPinCases	0
MAEA.21477.105	MAEA	MAEA	Macrophage erythroblast attacher	-0.322163	3.5258e-05	0.000121963	DOWNinCases	0
SPINT2.2843.13	SPINT2	SPINT2	Kunitz-type protease inhibitor 2	-0.598509	3.56036e-05	0.000123042	DOWNinCases	0
IGBP1.12358.6	IGBP1	IGBP1	Immunoglobulin-binding protein 1	-0.680276	3.59823e-05	0.000124292	DOWNinCases	0
WIF1.16070.7	WIF1	WIF-1	Wnt inhibitory factor 1	-0.384924	3.62316e-05	0.000125034	DOWNinCases	0
TMOD1.12595.11	TMOD1	TMOD1	Tropomodulin-1	0.593351	3.68243e-05	0.000126959	UPinCases	0
PDIA3.4719.58	PDIA3	Protein disulfide isomerase A3	Protein disulfide-isomerase A3	-0.824509	3.69429e-05	0.000127308	DOWNinCases	0
CA11.8859.51	CA11	CAH11	Carbonic anhydrase-related protein 11	-0.721201	3.7271e-05	0.000128317	DOWNinCases	0
SERPINA10.13119.26	SERPINA10	protein Z inhibitor	Protein Z-dependent protease inhibitor	0.405277	3.74101e-05	0.000128674	UPinCases	0
HMBS.11530.37	HMBS	HEM3	Porphobilinogen deaminase	0.889751	3.77106e-05	0.000129586	UPinCases	0
HABP2.20067.26	HABP2	FSAP	Factor seven-activating protease	0.362007	3.77726e-05	0.000129738	UPinCases	0
HEXIM2.14205.6	HEXIM2	HEXI2	Protein HEXIM2	-0.433125	3.79416e-05	0.000130257	DOWNinCases	0
DEFB1.6629.3	DEFB1	HBD-1	Beta-defensin 1	0.435674	3.84188e-05	0.000131833	UPinCases	0
ST3GAL2.6281.51	ST3GAL2	SIA4B	CMP-N-acetylneuraminate-beta-galactosamide-alpha-2,3-sialyltransferase 2	0.473852	3.86139e-05	0.00013244	UPinCases	1
UBE2V2.18165.181	UBE2V2	UB2V2	Ubiquitin-conjugating enzyme E2 variant 2	-0.588737	3.86827e-05	0.000132553	DOWNinCases	0
UNC45A.11712.207	UNC45A	UN45A	Protein unc-45 homolog A	-0.557881	3.86834e-05	0.000132553	DOWNinCases	0
DDHD2.25499.37	DDHD2	DDHD2	Phospholipase DDHD2	-0.426083	3.90016e-05	0.000133518	DOWNinCases	0
TAX1BP3.12498.12	TAX1BP3	TX1B3	Tax1-binding protein 3	-0.545706	3.90845e-05	0.000133739	DOWNinCases	0
IL18.5661.15	IL18	IL-18	Interleukin-18	0.467084	3.97604e-05	0.000135988	UPinCases	0
LYZL2.6377.54	LYZL2	LYZL2	Lysozyme-like protein 2	-0.369726	3.99504e-05	0.000136574	DOWNinCases	0
ICOSLG.9303.9	ICOSLG	B7-H2	ICOS ligand	-0.354478	4.01999e-05	0.000137362	DOWNinCases	0
CRIPT.19294.26	CRIPT	CRIPT	Cysteine-rich PDZ-binding protein	0.329708	4.08238e-05	0.000139298	UPinCases	0
NMRAL1.13988.67	NMRAL1	NMRL1	NmrA-like family domain-containing protein 1	-0.571256	4.16412e-05	0.000142021	DOWNinCases	0
GNPDA1.8909.77	GNPDA1	GNPI1	Glucosamine-6-phosphate isomerase 1	0.502297	4.19171e-05	0.000142895	UPinCases	1
PRTG.21397.21	PRTG	PRTG	Protogenin	-0.485483	4.23289e-05	0.000144096	DOWNinCases	1
BAG1.17195.43	BAG1	BAG-1	BAG family molecular chaperone regulator 1	-0.442773	4.26319e-05	0.00014506	DOWNinCases	0
UBE2F.18213.30	UBE2F	UBE2F	NEDD8-conjugating enzyme UBE2F	-0.540236	4.27971e-05	0.000145554	DOWNinCases	0
CCL1.2770.51	CCL1	I-309	C-C motif chemokine 1	-0.390778	4.30527e-05	0.000146355	DOWNinCases	0
UBB.6641.60	UBB	PolyUbiquitin K48	PolyUbiquitin K48-linked	0.516512	4.32501e-05	0.000146958	UPinCases	0
TPI1.4309.59	TPI1	Triosephosphate isomerase	Triosephosphate isomerase	-0.738467	4.34362e-05	0.000147521	DOWNinCases	0
CBR3.14091.42	CBR3	Carbonyl reductase 3	Carbonyl reductase [NADPH] 3	-0.683203	4.34573e-05	0.000147524	DOWNinCases	0
DAPK3.24261.202	DAPK3	DAPK3	Death-associated protein kinase 3	-0.520831	4.3498e-05	0.000147593	DOWNinCases	0
OMG.16908.5	OMG	OMGP	Oligodendrocyte-myelin glycoprotein	-0.646985	4.42303e-05	0.000149938	DOWNinCases	1
ACP1.3858.5	ACP1	PPAC	Low molecular weight phosphotyrosine protein phosphatase	-0.819126	4.44415e-05	0.000150584	DOWNinCases	0
SCO2.16851.50	SCO2	SCO2	Protein SCO2 homolog, mitochondrial	-0.634763	4.49268e-05	0.000152087	DOWNinCases	0
FAM20A.6433.57	FAM20A	FA20A	Pseudokinase FAM20A	0.433925	4.55868e-05	0.000154107	UPinCases	0
EIF4G1.25287.7	EIF4G1	IF4G1	Eukaryotic translation initiation factor 4 gamma 1	-0.853869	4.61263e-05	0.000155858	DOWNinCases	0
RAB31.13597.20	RAB31	RAB31	Ras-related protein Rab-31	-0.773285	4.756e-05	0.000160479	DOWNinCases	0
S100A9.5339.49	S100A9	calgranulin B	Protein S100-A9	0.626507	4.78139e-05	0.000161261	UPinCases	0
CD2AP.21961.14	CD2AP	CD2AP	CD2-associated protein	-0.443745	4.82407e-05	0.00016255	DOWNinCases	0
STX17.21649.12	STX17	STX17	Syntaxin-17	-0.543462	4.83014e-05	0.00016268	DOWNinCases	0
ETV5.13403.5	ETV5	ETV5	ETS translocation variant 5	0.360142	4.84284e-05	0.000163032	UPinCases	0
CNN1.15566.10	CNN1	Calponin-1	Calponin-1	-0.443117	4.89148e-05	0.000164441	DOWNinCases	0
MIEF1.23668.281	MIEF1	MID51	Mitochondrial dynamics protein MID51	-0.425204	4.93085e-05	0.000165688	DOWNinCases	0
SEC22A.13713.164	SEC22A	SC22A	Vesicle-trafficking protein SEC22a	-0.629319	4.95897e-05	0.00016638	DOWNinCases	0
KMO.25466.84	KMO	KMO	Kynurenine 3-monooxygenase	-0.362675	5.03252e-05	0.000168638	DOWNinCases	0
CA3.3799.11	CA3	Carbonic anhydrase III	Carbonic anhydrase 3	1.01753	5.11468e-05	0.000171234	UPinCases	0
NDUFB4.10677.9	NDUFB4	NDUB4	NADH dehydrogenase [ubiquinone] 1 beta subcomplex subunit 4	-0.473993	5.16369e-05	0.000172795	DOWNinCases	0
GSS.15526.33	GSS	GSHB	Glutathione synthetase	0.417344	5.21044e-05	0.000174279	UPinCases	0
FAM110A.22371.46	FAM110A	F110A	Protein FAM110A	-0.423479	5.23206e-05	0.000174922	DOWNinCases	0
ABLIM3.13578.98	ABLIM3	ABLM3	Actin-binding LIM protein 3	-0.593075	5.32668e-05	0.000178004	DOWNinCases	0
FSTL3.3438.10	FSTL3	FSTL3	Follistatin-related protein 3	0.603834	5.48406e-05	0.000183095	UPinCases	0
SERPINA4.14105.5	SERPINA4	Kallistatin	Kallistatin	-0.537556	5.51755e-05	0.000184129	DOWNinCases	1
EFCAB14.9514.46	EFCAB14	K0494	EF-hand calcium-binding domain-containing protein 14	-0.453463	5.57384e-05	0.000185752	DOWNinCases	0
PRKAR1A.21483.155	PRKAR1A	KAP0	cAMP-dependent protein kinase type I-alpha regulatory subunit	-0.57921	5.6226e-05	0.000187206	DOWNinCases	0
GRN.4992.49	GRN	GRN	Granulins	0.394993	5.68142e-05	0.000188973	UPinCases	0
ERP44.6064.4	ERP44	TXNDC4	Endoplasmic reticulum resident protein 44	0.545358	5.68211e-05	0.000188973	UPinCases	0
PTRHD1.20386.15	PTRHD1	PTRD1	Putative peptidyl-tRNA hydrolase PTRHD1	-0.847576	5.68345e-05	0.000188973	DOWNinCases	0
CXCL11.3038.9	CXCL11	I-TAC	C-X-C motif chemokine 11	0.830244	5.69748e-05	0.000189353	UPinCases	1
DDI2.25446.34	DDI2	DDI2	Protein DDI1 homolog 2	0.714721	5.70068e-05	0.000189373	UPinCases	0
TNC.7131.207	TNC	Tenascin	Tenascin	0.483801	5.7186e-05	0.000189882	UPinCases	0
RARRES1.8398.277	RARRES1	RAR-responsive protein TIG1	Retinoic acid receptor responder protein 1	0.614544	5.73032e-05	0.000190184	UPinCases	0
SNCA.8458.111	SNCA	a-Synuclein	Alpha-synuclein	-0.649745	5.74031e-05	0.000190429	DOWNinCases	0
SERPINA4.3449.58	SERPINA4	Kallistatin	Kallistatin	-0.582262	5.89874e-05	0.000195418	DOWNinCases	1
PRSS57.8351.17	PRSS57	PRS57	Serine protease 57	0.898921	5.98158e-05	0.000197892	UPinCases	1
DDR1.4122.12	DDR1	discoidin domain receptor 1	Epithelial discoidin domain-containing receptor 1	-0.423813	6.11712e-05	0.000202193	DOWNinCases	1
VPS26A.19293.6	VPS26A	VP26A	Vacuolar protein sorting-associated protein 26A	-0.553062	6.19268e-05	0.000204504	DOWNinCases	0
GPD1L.12420.10	GPD1L	GPD1L	Glycerol-3-phosphate dehydrogenase 1-like protein	-0.496959	6.2133e-05	0.000205092	DOWNinCases	0
CAP1.12034.28	CAP1	CAP 1	Adenylyl cyclase-associated protein 1	-1.04146	6.2473e-05	0.000205982	DOWNinCases	0
LTO1.18195.3	LTO1	ORAV1	Oral cancer-overexpressed protein 1	-0.512987	6.2481e-05	0.000205982	DOWNinCases	0
NFE2L1.11154.3	NFE2L1	NF2L1	Nuclear factor erythroid 2-related factor 1	-0.690065	6.24874e-05	0.000205982	DOWNinCases	0
SULT1A1.21227.18	SULT1A1	SULT 1A1*2	SULT 1A1*2	-1.07767	6.28065e-05	0.00020694	DOWNinCases	0
CARS1.14098.28	CARS1	SYCC	Cysteine--tRNA ligase, cytoplasmic	-0.557162	6.35452e-05	0.000209185	DOWNinCases	0
GOLM1.8983.7	GOLM1	GOLM1	Golgi membrane protein 1	0.60862	6.4393e-05	0.00021188	UPinCases	1
ERP29.13728.19	ERP29	ERP29	Endoplasmic reticulum resident protein 29	-1.07757	6.46314e-05	0.000212569	DOWNinCases	0
GABARAPL2.12494.99	GABARAPL2	GBRL2	Gamma-aminobutyric acid receptor-associated protein-like 2	-0.716467	6.48637e-05	0.000213237	DOWNinCases	0
PLD3.10948.14	PLD3	PLD3	Phospholipase D3	-0.876918	6.51093e-05	0.000213947	DOWNinCases	0
CRKL.9877.28	CRKL	CRKL	Crk-like protein	-0.843077	6.51963e-05	0.000214137	DOWNinCases	0
MAFG.19281.86	MAFG	MAFG	Transcription factor MafG	0.401459	6.53594e-05	0.000214576	UPinCases	1
IL2RG.2634.2	IL2RG	IL-2 sRg	Cytokine receptor common subunit gamma	-0.555317	6.56289e-05	0.000215363	DOWNinCases	0
UBC.6172.7	UBC	PolyUbiquitin K63	PolyUbiquitin K63-linked	0.332956	6.58693e-05	0.000216055	UPinCases	0
DCPS.20106.80	DCPS	DCPS	Scavenger mRNA-decapping enzyme DcpS	0.351842	6.60761e-05	0.000216636	UPinCases	1
DPP10.7890.68	DPP10	DPP10	Inactive dipeptidyl peptidase 10	0.345489	6.65366e-05	0.000218047	UPinCases	0
LEFTY2.15503.20	LEFTY2	Lefty-A	Left-right determination factor 2	-0.538675	6.69256e-05	0.000219223	DOWNinCases	1
FAHD1.17819.30	FAHD1	FAHD1	Acylpyruvase FAHD1, mitochondrial	-1.00568	6.81415e-05	0.000222906	DOWNinCases	0
CDC42BPA.12706.2	CDC42BPA	MRCKA	Serine/threonine-protein kinase MRCK alpha	-0.438616	6.90773e-05	0.000225865	DOWNinCases	0
USP14.19189.2	USP14	UBP14	Ubiquitin carboxyl-terminal hydrolase 14	-0.5322	7.029e-05	0.000229727	DOWNinCases	0
NMT2.17821.20	NMT2	NMT2	Glycylpeptide N-tetradecanoyltransferase 2	-0.744392	7.07292e-05	0.000231059	DOWNinCases	0
POU6F1.21194.39	POU6F1	PO6F1	POU domain, class 6, transcription factor 1	-0.50292	7.12432e-05	0.000232634	DOWNinCases	0
BOC.4328.2	BOC	BOC	Brother of CDO	-0.594987	7.18494e-05	0.000234508	DOWNinCases	1
B3GLCT.5727.35	B3GLCT	B3GLT	Beta-1,3-glucosyltransferase	-0.492872	7.23771e-05	0.000236125	DOWNinCases	0
SBDS.3866.7	SBDS	SBDS	Ribosome maturation protein SBDS	-0.512772	7.3571e-05	0.000239805	DOWNinCases	0
APOL2.23566.6	APOL2	ApoL-II	Apolipoprotein-L2	0.724067	7.39489e-05	0.000240929	UPinCases	1
YJU2.23571.93	YJU2	CCD94	Coiled-coil domain-containing protein 94	-0.504933	7.41797e-05	0.000241573	DOWNinCases	0
ALPG.6715.63	ALPG	PPBN	Alkaline phosphatase, placental-like	0.322003	7.49466e-05	0.000243853	UPinCases	0
SMIM9.8888.33	SMIM9	CX068	Small integral membrane protein 9	-0.394641	7.5955e-05	0.000246913	DOWNinCases	0
OGFR.24934.96	OGFR	OGFR	Opioid growth factor receptor	0.512664	7.61254e-05	0.000247357	UPinCases	1
KNG1.15343.337	KNG1	Kininogen, HMW, Two Chain	Kininogen, HMW, Two Chain	-0.463868	7.6973e-05	0.000249776	DOWNinCases	1
MMP2.4160.49	MMP2	MMP-2	72 kDa type IV collagenase	-0.369299	7.81011e-05	0.000253212	DOWNinCases	1
NUDC.8887.21	NUDC	NUDC	Nuclear migration protein nudC	-0.597934	8.0809e-05	0.000261525	DOWNinCases	0
IL1B.3037.62	IL1B	IL-1b	Interleukin-1 beta	0.325446	8.15607e-05	0.000263841	UPinCases	0
MIF.5356.2	MIF	MIF	Macrophage migration inhibitory factor	-0.378283	8.20455e-05	0.000265221	DOWNinCases	0
EIF1B.12701.1	EIF1B	EIF1B	Eukaryotic translation initiation factor 1b	-0.873894	8.38897e-05	0.000270654	DOWNinCases	0
GZMA.13712.104	GZMA	granzyme A	Granzyme A	-0.412855	8.46766e-05	0.000273072	DOWNinCases	0
PSAPL1.8814.33	PSAPL1	SAPL1	Proactivator polypeptide-like 1	-0.571708	8.49456e-05	0.000273818	DOWNinCases	1
TNFRSF10A.4832.75	TNFRSF10A	TRAIL R1	Tumor necrosis factor receptor superfamily member 10A	0.381381	8.52046e-05	0.000274531	UPinCases	1
FGFRL1.6237.11	FGFRL1	FGRL1	Fibroblast growth factor receptor-like 1	0.685175	8.59424e-05	0.000276786	UPinCases	0
LGMN.3622.33	LGMN	LGMN	Legumain	0.346841	8.59964e-05	0.000276838	UPinCases	0
NUDT21.20972.37	NUDT21	CPSF5	Cleavage and polyadenylation specificity factor subunit 5	-0.549757	8.62585e-05	0.000277559	DOWNinCases	0
SCN2B.8353.15	SCN2B	SCN2B	Sodium channel subunit beta-2	-0.336745	8.63381e-05	0.000277692	DOWNinCases	0
RRM1.11360.39	RRM1	RRM1	Ribonucleoside-diphosphate reductase large subunit	0.965554	8.64392e-05	0.000277733	UPinCases	0
DPYSL3.12707.26	DPYSL3	DPYL3	Dihydropyrimidinase-related protein 3	-0.53678	8.64894e-05	0.000277733	DOWNinCases	0
CAPG.4968.50	CAPG	CAPG	Macrophage-capping protein	0.586825	8.68362e-05	0.000278679	UPinCases	1
NT5C3A.19615.213	NT5C3A	5NT3	Cytosolic 5'-nucleotidase 3A	-0.883481	8.81252e-05	0.000282691	DOWNinCases	0
RNASE6.5646.20	RNASE6	RNAS6	Ribonuclease K6	0.626537	9.1275e-05	0.000292152	UPinCases	0
PCBP2.23363.41	PCBP2	PCBP2	Poly(rC)-binding protein 2	-0.940441	9.20145e-05	0.00029439	DOWNinCases	0
MTHFD2L.24454.27	MTHFD2L	MTD2L	Probable bifunctional methylenetetrahydrofolate dehydrogenase/cyclohydrolase 2	-0.626766	9.22693e-05	0.000295075	DOWNinCases	0
UNG.22821.50	UNG	UNG	Uracil-DNA glycosylase	-0.506609	9.40663e-05	0.000300408	DOWNinCases	1
TOR1AIP1.10606.34	TOR1AIP1	TOIP1	Torsin-1A-interacting protein 1	-0.566602	9.41018e-05	0.000300408	DOWNinCases	0
PSMB1.12612.37	PSMB1	PSB1	Proteasome subunit beta type-1	0.370094	9.55054e-05	0.000304756	UPinCases	1
ACYP2.12812.25	ACYP2	ACYP2	Acylphosphatase-2	-0.572225	9.65511e-05	0.000307957	DOWNinCases	0
TNFRSF17.2665.26	TNFRSF17	BCMA	Tumor necrosis factor receptor superfamily member 17	-0.374425	9.857e-05	0.000313984	DOWNinCases	0
LANCL2.12628.31	LANCL2	LANC2	LanC-like protein 2	-0.670767	9.92446e-05	0.000315857	DOWNinCases	0
SCGB1D2.6508.68	SCGB1D2	SG1D2	Secretoglobin family 1D member 2	-0.33219	9.96104e-05	0.000316883	DOWNinCases	0
TREML1.9329.28	TREML1	TRML1	Trem-like transcript 1 protein	-0.724141	0.000102431	0.000324947	DOWNinCases	0
RAB33A.23255.7	RAB33A	Rab-33A	Ras-related protein Rab-33A	-0.721619	0.000102469	0.000324947	DOWNinCases	0
DLK1.6496.60	DLK1	DLK1	Protein delta homolog 1	-0.531459	0.000102887	0.000326027	DOWNinCases	0
PLAAT2.7822.11	PLAAT2	HRSL2	HRAS-like suppressor 2	0.677793	0.000102981	0.000326181	UPinCases	1
TIMP2.2278.61	TIMP2	TIMP-2	Metalloproteinase inhibitor 2	-0.322352	0.000103194	0.000326713	DOWNinCases	1
PNPT1.21378.7	PNPT1	PNPT1	Polyribonucleotide nucleotidyltransferase 1, mitochondrial	-1.09389	0.000103263	0.000326789	DOWNinCases	0
TESC.12831.21	TESC	TESC	Calcineurin B homologous protein 3	-0.408254	0.000104226	0.000329696	DOWNinCases	0
EIF1.20913.27	EIF1	EIF1	Eukaryotic translation initiation factor 1	-0.568206	0.000104986	0.000331954	DOWNinCases	0
IL15.19568.17	IL15	IL-15	Interleukin-15	-0.43312	0.000105244	0.000332483	DOWNinCases	0
DDX58.12382.2	DDX58	DDX58	Probable ATP-dependent RNA helicase DDX58	0.657708	0.0001056	0.000333461	UPinCases	1
STYX.21349.2	STYX	STYX	Serine/threonine/tyrosine-interacting protein	-0.342821	0.000109278	0.000344777	DOWNinCases	0
THRB.22808.59	THRB	THB	Thyroid hormone receptor beta	-0.427347	0.000110772	0.000349036	DOWNinCases	0
CDH3.2643.57	CDH3	P-Cadherin	Cadherin-3	-0.420649	0.000110827	0.00034906	DOWNinCases	1
RTN4R.5105.2	RTN4R	Nogo Receptor	Reticulon-4 receptor	-0.359975	0.000111627	0.000351427	DOWNinCases	0
TYK2.5260.80	TYK2	TYK2	Non-receptor tyrosine-protein kinase TYK2	-0.329122	0.000112187	0.000353038	DOWNinCases	0
KLK14.8620.56	KLK14	kallikrein 14	Kallikrein-14	-0.579004	0.000114569	0.000360377	DOWNinCases	1
SYAP1.23409.83	SYAP1	SYAP1	Synapse-associated protein 1	-0.745097	0.000115619	0.000363368	DOWNinCases	0
NIT2.17808.37	NIT2	NIT2	Omega-amidase NIT2	-0.900504	0.000116021	0.000364474	DOWNinCases	0
SPON1.4297.62	SPON1	Spondin-1	Spondin-1	0.497985	0.000116705	0.000366462	UPinCases	0
PTGR1.19617.5	PTGR1	LTB4DH	Prostaglandin reductase 1	-0.623002	0.0001186	0.000372254	DOWNinCases	0
APOBEC3G.13930.3	APOBEC3G	ABC3G	DNA dC->dU-editing enzyme APOBEC-3G	-0.832542	0.000119201	0.000373978	DOWNinCases	0
CLYBL.23541.61	CLYBL	CLYBL	Citrate lyase subunit beta-like protein, mitochondrial	-1.0677	0.000119671	0.000375292	DOWNinCases	0
HES1.22465.43	HES1	HES1	Transcription factor HES-1	-0.371752	0.000119767	0.000375432	DOWNinCases	0
HAGH.19267.14	HAGH	GLO2	Hydroxyacylglutathione hydrolase, mitochondrial	-0.56554	0.000120671	0.000377945	DOWNinCases	0
RBM41.23690.228	RBM41	RBM41	RNA-binding protein 41	-0.366235	0.000121747	0.000380948	DOWNinCases	0
WSCD2.6274.15	WSCD2	WSCD2	WSC domain-containing protein 2	-0.435549	0.000121979	0.00038138	DOWNinCases	0
TCP1.19265.9	TCP1	TCPA	T-complex protein 1 subunit alpha	-0.838015	0.000123099	0.000384717	DOWNinCases	0
TNFRSF21.9259.35	TNFRSF21	DR6	Tumor necrosis factor receptor superfamily member 21	-0.522217	0.000127712	0.000398452	DOWNinCases	0
DEFA3.20539.4	DEFA3	HNP-3	Neutrophil defensin 3	1.30756	0.00012782	0.000398615	UPinCases	1
RBM23.11590.5	RBM23	RBM23	Probable RNA-binding protein 23	0.371172	0.000129028	0.00040204	UPinCases	1
HNRNPF.9764.79	HNRNPF	HNRPF	Heterogeneous nuclear ribonucleoprotein F	-0.45285	0.000130701	0.000406905	DOWNinCases	0
POMGNT2.6359.50	POMGNT2	AGO61	Protein O-linked-mannose beta-1,4-N-acetylglucosaminyltransferase 2	-0.5561	0.000130998	0.000407654	DOWNinCases	0
ARHGAP1.9815.5	ARHGAP1	RHG01	Rho GTPase-activating protein 1	-0.370781	0.000133749	0.000414974	DOWNinCases	0
PDYN.19638.9	PDYN	Dynorphin A (1-17)	Dynorphin A (1-17)	-0.452293	0.000134134	0.000415993	DOWNinCases	0
IL27RA.5132.71	IL27RA	TCCR	Interleukin-27 receptor subunit alpha	-0.431143	0.000134744	0.000417707	DOWNinCases	0
BPNT1.17814.8	BPNT1	BPNT1	3'(2'),5'-bisphosphate nucleotidase 1	-0.524026	0.000138695	0.00042977	DOWNinCases	0
CHAC1.23293.15	CHAC1	CHAC1	Glutathione-specific gamma-glutamylcyclotransferase 1	-0.358876	0.00013958	0.000432146	DOWNinCases	0
UBE2C.12556.7	UBE2C	UBE2C	Ubiquitin-conjugating enzyme E2 C	-0.459552	0.000140104	0.000433401	DOWNinCases	0
UBE3A.11226.16	UBE3A	UBE3A	Ubiquitin-protein ligase E3A	-0.48336	0.000140543	0.000434574	DOWNinCases	0
IL3RA.13744.37	IL3RA	IL-3 Ra	Interleukin-3 receptor subunit alpha	-0.496823	0.000142962	0.000441866	DOWNinCases	0
CATIP.25242.12	CATIP	CATIP	Ciliogenesis-associated TTC17-interacting protein	-0.364577	0.000143174	0.000442334	DOWNinCases	0
MDGA1.16900.29	MDGA1	MDGA1	MAM domain-containing glycosylphosphatidylinositol anchor protein 1	-0.541411	0.000144588	0.000446325	DOWNinCases	0
SERPINA11.9002.36	SERPINA11	SPA11	Serpin A11	-0.475291	0.000146868	0.000452976	DOWNinCases	1
PCLAF.19158.1	PCLAF	PAF	PCNA-associated factor	0.438506	0.000147203	0.000453819	UPinCases	0
FHIT.9826.135	FHIT	Fragile histidine triad protein	Bis(5'-adenosyl)-triphosphatase	-0.782863	0.000147368	0.000454137	DOWNinCases	0
CTNNBIP1.21600.10	CTNNBIP1	CNBP1	Beta-catenin-interacting protein 1	-0.579365	0.000149952	0.000461512	DOWNinCases	0
LIN7A.22989.24	LIN7A	LIN7A	Protein lin-7 homolog A	0.398885	0.000150032	0.000461564	UPinCases	0
KAT2A.19369.17	KAT2A	GCNL2	Histone acetyltransferase KAT2A	-0.323751	0.000150651	0.000463274	DOWNinCases	0
PDCD6IP.18174.79	PDCD6IP	PDC6I	Programmed cell death 6-interacting protein	-0.723897	0.000152332	0.000467848	DOWNinCases	0
CTSB.8007.19	CTSB	Cathepsin B	Cathepsin B	-0.542941	0.000152678	0.000468715	DOWNinCases	1
KL.15384.15	KL	KLOTHO	Klotho	-0.513209	0.000156127	0.000479101	DOWNinCases	0
KTI12.23526.25	KTI12	KTI12	Protein KTI12 homolog	-0.632449	0.000157428	0.000482891	DOWNinCases	0
ACP5.3232.28	ACP5	TrATPase	Tartrate-resistant acid phosphatase type 5	0.373335	0.000157742	0.000483649	UPinCases	1
IL1RAP.14048.7	IL1RAP	IL-1 R AcP	Interleukin-1 Receptor accessory protein	-0.323801	0.000158635	0.000485977	DOWNinCases	0
TNFSF15.2968.61	TNFSF15	TNFSF15	Tumor necrosis factor ligand superfamily member 15	0.345209	0.000159527	0.000488095	UPinCases	0
FGFBP1.9507.55	FGFBP1	FGFP1	Fibroblast growth factor-binding protein 1	0.831841	0.000160322	0.000490322	UPinCases	0
FAIM.16594.44	FAIM	FAIM1	Fas apoptotic inhibitory molecule 1	-0.56243	0.000160907	0.000491905	DOWNinCases	0
C2.3186.2	C2	C2	Complement C2	0.346723	0.000161301	0.000492903	UPinCases	0
FGF19.2762.30	FGF19	FGF-19	Fibroblast growth factor 19	-0.843147	0.000163344	0.000498725	DOWNinCases	1
FMR1.7713.102	FMR1	FMR1	Fragile X mental retardation protein 1	-0.36436	0.000163613	0.000499337	DOWNinCases	0
FXYD6.25412.53	FXYD6	FXYD6	FXYD domain-containing ion transport regulator 6	-0.34408	0.000166228	0.000506895	DOWNinCases	0
CCDC9.25116.11	CCDC9	CCDC9	Coiled-coil domain-containing protein 9	-0.668793	0.000167014	0.000509078	DOWNinCases	0
KLK6.3450.4	KLK6	Kallikrein 6	Kallikrein-6	-0.337556	0.00016746	0.000510224	DOWNinCases	0
VSNL1.13522.20	VSNL1	VISL1	Visinin-like protein 1	-0.662687	0.000167817	0.0005111	DOWNinCases	0
CD68.18922.27	CD68	CD68	Macrosialin	-0.460558	0.000169328	0.000515484	DOWNinCases	0
IFNA7.14129.1	IFNA7	IFNA7	Interferon alpha-7	0.377226	0.000172493	0.000524024	UPinCases	1
MFAP2.9294.45	MFAP2	MFAP2	Microfibrillar-associated protein 2	-0.405506	0.000173703	0.000527261	DOWNinCases	1
SNCA.8458.16	SNCA	a-Synuclein	Alpha-synuclein	-0.765963	0.00017425	0.000528701	DOWNinCases	0
LYVE1.3206.4	LYVE1	LYVE1	Lymphatic vessel endothelial hyaluronic acid receptor 1	-0.487701	0.000174773	0.000530067	DOWNinCases	1
GHRL.6518.85	GHRL	ghrelin	Appetite-regulating hormone	-0.915447	0.000178478	0.000540854	DOWNinCases	0
CNTFR.14101.2	CNTFR	CNTFR alpha	Ciliary neurotrophic factor receptor subunit alpha	-0.366211	0.000178757	0.000541475	DOWNinCases	0
HSPH1.17704.74	HSPH1	HS105	Heat shock protein 105 kDa	0.346842	0.000180962	0.000547926	UPinCases	1
KDM8.24307.22	KDM8	KDM8	Lysine-specific demethylase 8	0.436648	0.000181186	0.000548376	UPinCases	0
DLK1.6373.54	DLK1	DLK1	Protein delta homolog 1	-0.53376	0.0001819	0.000550309	DOWNinCases	0
L3MBTL2.12708.91	L3MBTL2	LMBL2	Lethal(3)malignant brain tumor-like protein 2	-0.390356	0.000182653	0.000551669	DOWNinCases	0
SAR1A.23024.25	SAR1A	SAR1A	GTP-binding protein SAR1a	-0.337307	0.000187233	0.000564802	DOWNinCases	0
G6PD.19297.4	G6PD	G6PD	Glucose-6-phosphate 1-dehydrogenase	-1.1313	0.000187664	0.000565867	DOWNinCases	0
RALA.14332.3	RALA	RALA	Ras-related protein Ral-A	-0.62913	0.000191275	0.000575801	DOWNinCases	0
MRM1.21319.196	MRM1	MRM1	rRNA methyltransferase 1, mitochondrial	-0.362769	0.000193076	0.000580656	DOWNinCases	0
DHRS4.21308.44	DHRS4	DHRS4	Dehydrogenase/reductase SDR family member 4	-0.471991	0.000193127	0.000580656	DOWNinCases	0
EEF1G.24111.10	EEF1G	EF1G	Elongation factor 1-gamma	-0.437487	0.000194314	0.000583983	DOWNinCases	0
DYNLL2.11493.169	DYNLL2	DYL2	Dynein light chain 2, cytoplasmic	-0.705614	0.000194859	0.000585139	DOWNinCases	0
HOXC11.22474.28	HOXC11	HXC11	Homeobox protein Hox-C11	-0.440454	0.000195171	0.0005856	DOWNinCases	0
CSGALNACT2.10772.21	CSGALNACT2	CGAT2	Chondroitin sulfate N-acetylgalactosaminyltransferase 2	-0.337074	0.000195173	0.0005856	DOWNinCases	0
IFI16.12893.159	IFI16	IP16	Gamma-interferon-inducible protein 16	0.413895	0.000195788	0.000587203	UPinCases	1
DTD2.18280.29	DTD2	DTD2	Putative D-tyrosyl-tRNA(Tyr) deacylase 2	-0.53482	0.000199018	0.00059591	DOWNinCases	0
PPME1.17852.5	PPME1	PPME1	Protein phosphatase methylesterase 1	-0.539666	0.000202023	0.00060416	DOWNinCases	0
ARG2.17752.24	ARG2	Arginase	Arginase-2, mitochondrial	-0.342896	0.000204259	0.000610571	DOWNinCases	0
MANSC1.9557.5	MANSC1	MANS1	MANSC domain-containing protein 1	0.3918	0.000204334	0.000610571	UPinCases	1
METAP2.3170.6	METAP2	AMPM2	Methionine aminopeptidase 2	-0.558326	0.000205211	0.000612688	DOWNinCases	0
EIF5A2.11355.10	EIF5A2	IF5A2	Eukaryotic translation initiation factor 5A-2	-0.6394	0.000207514	0.000618806	DOWNinCases	0
STC1.4930.21	STC1	Stanniocalcin-1	Stanniocalcin-1	0.553416	0.000207704	0.000619116	UPinCases	1
PPIG.18449.33	PPIG	PPIG	Peptidyl-prolyl cis-trans isomerase G	-0.439036	0.000208043	0.000619822	DOWNinCases	0
MAP2K1.2864.2	MAP2K1	MEK1	Dual specificity mitogen-activated protein kinase kinase 1	-0.408102	0.00020811	0.000619822	DOWNinCases	0
FASN.8403.18	FASN	Fatty acid synthase	Fatty acid synthase	-0.65735	0.000210184	0.000625485	DOWNinCases	0
MSN.5009.11	MSN	Moesin	Moesin	-0.538038	0.000212208	0.000630993	DOWNinCases	0
LSM3.20976.19	LSM3	LSM3	U6 snRNA-associated Sm-like protein LSm3	-0.521251	0.000215279	0.000639603	DOWNinCases	0
SELP.4154.57	SELP	P-Selectin	P-selectin	-0.475033	0.000215562	0.000639923	DOWNinCases	0
TYMP.11361.73	TYMP	TP	Thymidine phosphorylase	-0.622638	0.000215758	0.000640242	DOWNinCases	0
[truncated: 607 more rows]
