# Supplementary material for: Pregnancy-specific responses to COVID-19 are revealed by high-throughput proteomics of human plasma
Source: Research Square preprint supplement (doi:10.21203/rs.3.rs-1906806/v1), 2022-08-22
Supplement: Supplementary file 4 [file 80e7e189380ae2f59da300ef.xlsx]

## Sheet: TableS6_
Supplementary Table 5. C2 pathways enriched among differentially regulated proteins in pregnant COVID-19 patients.
Name	Count	Size	OddsRatio	q	Pvalue	Genes
NABA_MATRISOME	139	708	2.6	4.40226e-14	1.62385e-17	C1QC;LGALS9;ITIH2;CXCL10;SERPINA4;SERPINA4;COL11A2;INHA;F9;CLEC11A;RELN;TLL1;F9;ITIH1;SERPINA3;CLEC11A;MDK;CSF1;BMP10;CTSD;HGFAC;SERPING1;AGRN;HRG;SEMA4A;CXCL11;HGFAC;FAM20B;CTSG;OIT3;NID2;CHAD;TMPRSS15;MMP17;CLEC7A;CTHRC1;CCL17;CBLN4;FBLN7;COLEC12;KNG1;VWC2;NID1;SERPINB8;MMP2;MFAP2;SERPINA11;IFNA4;KITLG;SERPINB13;IL1RN;EMILIN3;TNXB;TNFSF13B;PLAT;ADAM23;VWA1;CILP2;GDF9;PCOLCE;VWC2;CCL7;FGF19;LUM;…
CAIRO_LIVER_DEVELOPMENT_DN	41	134	4.3	1.13521e-08	8.37487e-12	LGALS9;AFM;AFM;ITIH2;C9;LCP1;CPB2;MPO;C9;LCP1;KLKB1;ITIH1;HP;HP;HGFAC;SERPING1;PRTN3;HGFAC;HMOX1;LBP;KNG1;NID1;PRTN3;CFP;IL1RN;PCSK7;PCK2;A2M;SAA4;F2;ANGPTL3;CTSH;KNG1;PDIA5;PROC;KNG1;OLFM4;CAMP;CRP;CAMP;FAH;SEMA4G;PYGL;CPQ;S100A9;ELANE;ARG1;PSAP;PRG2;GSTM3
SCHUETZ_BREAST_CANCER_DUCTAL_INVASIVE_UP	50	194	3.4	4.53158e-08	5.01466e-11	GBP1;C9;IFI16;C9;CLEC11A;CLEC11A;LRRC15;MRC2;SERPING1;ROR1;ROR1;HMOX1;IFI16;GIMAP4;CELF2;FTL;NID2;CLEC7A;MERTK;TDO2;COLEC12;NID1;CD74;MMP2;MFAP2;FCGR1A;ENTPD1;FCGR3B;LDLRAD4;PPIC;LUM;FAP;IL1R1;COMP;MSR1;NNMT;DCN;COL10A1;PLAUR;ROBO1;SPON1;COL15A1;HPGDS;PLS3;CCN1;POSTN;OLR1;CPQ;C1R;CALD1;THBS2;PKD2;INHBA;ESM1
HSIAO_LIVER_SPECIFIC_GENES	44	168	3.4	2.44277e-07	4.31481e-10	CAT;AFM;AFM;ITIH2;SAA1;C9;AZGP1;CPB2;RBP4;C9;F9;F9;KLKB1;ITIH1;SERPINA3;SAA1;GHR;RBP4;HP;HP;HGFAC;SERPING1;HRG;HGFAC;TDO2;KNG1;UGT2B15;C4A;APOA1;C4A;APOH;PCK2;SAA4;ALDH2;NNMT;FURIN;F2;ASGR1;F13B;FGL1;KNG1;PCBD1;FBP1;PROC;KNG1;FGFR4;CRP;FAH;ALDH1A1;SOD1;PYGL;ARG1;C1R;OTC
HECKER_IFNB1_TARGETS	21	47	7.7	2.44277e-07	4.5053e-10	ISG15;ISG15;MX1;ZBP1;IFIT3;C1QC;GBP1;CXCL10;DDX58;DHX58;RTP4;SERPING1;LILRA3;STAT1;LGALS3BP;LAP3;TREML1;CCL8;TYMP;STAT1;SIGLEC1;DTX3L;ARG1
NABA_MATRISOME_ASSOCIATED	97	545	2.2	3.85991e-07	9.24209e-10	C1QC;LGALS9;ITIH2;CXCL10;SERPINA4;SERPINA4;INHA;F9;CLEC11A;TLL1;F9;ITIH1;SERPINA3;CLEC11A;MDK;CSF1;BMP10;CTSD;HGFAC;SERPING1;HRG;SEMA4A;CXCL11;HGFAC;FAM20B;CTSG;TMPRSS15;MMP17;CLEC7A;CCL17;CBLN4;COLEC12;KNG1;VWC2;SERPINB8;MMP2;SERPINA11;IFNA4;KITLG;SERPINB13;IL1RN;TNFSF13B;PLAT;ADAM23;GDF9;VWC2;CCL7;FGF19;CTSV;SFRP5;A2M;FGF19;ADAMTSL1;IFNA7;F13A1;CCL8;IL2;TIMP2;IGF2;IFNA1;SFRP4;F2;ANGPTL3;F13B;AN…
MCLACHLAN_DENTAL_CARIES_UP	43	166	3.4	3.85991e-07	9.96657e-10	WARS1;SAA1;LCP1;CD14;TNFRSF1B;LCP1;SERPINA3;SAA1;LRRC15;DEPP1;TNFRSF1B;CD48;PLA2G7;CLEC7A;LBP;TREM1;C4A;CD74;IL1RN;C4A;CAPG;FCGR3B;ADA2;MSR1;NNMT;F13A1;CCL8;TYMP;CHL1;SFRP4;SOD2;PLAUR;CTSH;FCN1;COL15A1;THBS4;ACP5;SFRP4;CSF1R;TIMP1;S100A9;CTSB;CSF1R;IBSP;CXCL12;MCL1;RNASE1;MGP;INHBA
NABA_CORE_MATRISOME	42	163	3.4	6.33083e-07	1.86819e-09	COL11A2;RELN;AGRN;OIT3;NID2;CHAD;CTHRC1;FBLN7;NID1;MFAP2;EMILIN3;TNXB;VWA1;CILP2;PCOLCE;LUM;COMP;NTN1;VWF;THBS3;IGFBP5;FMOD;SMOC2;VIT;DCN;COL10A1;FGL1;SPON1;COL15A1;CRELD1;THBS4;MFGE8;CCN1;POSTN;SMOC1;MATN4;EDIL3;VIT;IBSP;THBS2;PRG2;MGP;ESM1
NABA_ECM_GLYCOPROTEINS	33	119	3.7	4.51173e-06	1.49781e-08	RELN;AGRN;OIT3;NID2;CTHRC1;FBLN7;NID1;MFAP2;EMILIN3;TNXB;VWA1;CILP2;PCOLCE;COMP;NTN1;VWF;THBS3;IGFBP5;SMOC2;VIT;FGL1;SPON1;CRELD1;THBS4;MFGE8;CCN1;POSTN;SMOC1;MATN4;EDIL3;VIT;IBSP;THBS2;MGP
BLANCO_MELO_RESPIRATORY_SYNCYTIAL_VIRUS_INFECTION_A594_CELLS_UP	40	162	3.2	4.63684e-06	1.71038e-08	MX1;IFIT3;GBP1;B2M;IFNL1;CXCL10;WARS1;LCP1;IFI16;DDX58;TNFRSF1B;SAA2;DHX58;LCP1;CRTAC1;CSF1;SERPING1;TNFRSF1B;CXCL11;IFI16;NID2;STAT1;IL15RA;SERPINB8;IFNL3;DCLK1;EFNB2;TNFSF13B;ANTXR2;CDH3;STC1;MICB;RAET1L;MICB;LAP3;HSPA6;SOD2;PLAUR;APOL2;COL15A1;STAT1;CSF1;B2M;CPM;DTX3L;CA13;TNFRSF10A
REACTOME_EXTRACELLULAR_MATRIX_ORGANIZATION	46	202	2.9	5.407e-06	2.19392e-08	COL11A2;TLL1;KLKB1;BMP10;CTSD;AGRN;CTSG;NID2;MMP17;CAPN13;BSG;DDR2;NID1;MMP2;DDR1;MFAP2;ITGB7;DDR1;EMILIN3;TNXB;ITGAV;PCOLCE;MUSK;LUM;CTSV;ICAM2;A2M;COMP;VWF;TIMP2;FMOD;DCN;LRP4;TPSAB1;FURIN;COL10A1;COL15A1;BMP7;KLK7;MATN4;TIMP1;MMP12;PRKCA;ELANE;CTSB;IBSP;BMP1
BLANCO_MELO_COVID19_SARS_COV_2_INFECTION_CALU3_CELLS_UP	37	151	3.1	1.6361e-05	7.35564e-08	ISG15;ISG15;MX1;ZBP1;IFIT3;GBP1;LGALS9;IFNL1;CXCL10;IFI16;DDX58;PLAAT2;DHX58;HSH2D;PGLYRP2;CSF1;DEPP1;RTP4;CXCL11;IFI16;TNFRSF11B;STAT1;IL15RA;IFNL3;TNFSF13B;CNTN4;PLAT;LST1;PCK2;FGF19;FAP;KIT;FGF19;RAET1L;SAA4;LIFR;CCL22;STAT1;CSF1;DTX3L;CCL22;C1R;INHBA
BLANCO_MELO_HUMAN_PARAINFLUENZA_VIRUS_3_INFECTION_A594_CELLS_UP	29	103	3.8	1.6361e-05	7.84555e-08	MX1;IFIT3;GBP1;B2M;IFNL1;CXCL10;WARS1;IFI16;DDX58;PLAAT2;DHX58;RTP4;SERPING1;EPHA4;CXCL11;IFI16;NMI;EPHA4;STAT1;IL15RA;IFNL3;DCLK1;EFNB2;TNFSF13B;STC1;RAET1L;LAP3;PLAUR;LIFR;STAT1;B2M;DTX3L;MCL1
NABA_ECM_REGULATORS	37	157	3	4.16696e-05	2.15188e-07	ITIH2;SERPINA4;SERPINA4;F9;TLL1;F9;ITIH1;SERPINA3;CTSD;SERPING1;HRG;FAM20B;CTSG;TMPRSS15;MMP17;KNG1;SERPINB8;MMP2;SERPINA11;SERPINB13;PLAT;ADAM23;CTSV;A2M;ADAMTSL1;F13A1;TIMP2;F2;F13B;CTSH;HYAL1;ADAM22;KNG1;KNG1;TIMP1;MMP12;A2ML1;ELANE;CTSB;BMP1;SERPINA12
KEGG_SYSTEMIC_LUPUS_ERYTHEMATOSUS	17	44	6	5.09014e-05	2.81638e-07	C1QC;C9;H2AC1;H2BU1;H2BC21;H2BC12;H2BC21;C9;H2AC11;H2AW;CTSG;H2AZ1;C4A;FCGR1A;H3C1;C4A;FCGR3B;ELANE;C1R;FCGR3A
BENNETT_SYSTEMIC_LUPUS_ERYTHEMATOSUS	10	16	15.7	5.57369e-05	3.28953e-07	ISG15;ISG15;MX1;IFIT3;SERPING1;AGRN;STAT1;LGALS3BP;DEFA3;STAT1;CAMP;CAMP;DEFA1
REACTOME_AMYLOID_FIBER_FORMATION	16	40	6.3	5.75557e-05	3.60917e-07	B2M;SAA1;H2BU1;H2BC21;H2BC12;H2BC21;SAA1;NPPA;H2AZ1;APOA4;CALB1;UBC;APOA1;H3C1;FURIN;IAPP;MFGE8;B2M;PRL;PRL
REACTOME_NEUTROPHIL_DEGRANULATION	58	309	2.2	6.90157e-05	4.79595e-07	B2M;CAT;HSPA1A;CD14;TNFRSF1B;MPO;HEXB;PSMA2;SERPINA3;HP;HP;CTSD;TNFRSF1B;PRTN3;CTSG;FTL;QPCT;FTH1;LILRA3;CR1;IGF2R;PRTN3;CFP;HSPA1A;PIGR;HEXB;LILRB2;CD300A;ITGAV;FCGR3B;XRCC6;PSMB1;ADA2;HSPA1A;HSPA1A;HSPA1A;HSPA6;TIMP2;PLAUR;CTSH;FCN1;PSMD6;HSPA8;BIN2;ALAD;AOC1;OLFM4;B2M;HSPA1A;OLR1;CAMP;CPNE1;GUSB;SIGLEC14;RAB37;ATG7;HSPA1B;LILRA6;CAMP;PYGL;AOC1;S100A9;ELANE;CTSB;ARG1;PSAP;DPP7;PRG2;LTA4H;SIGLEC…
KEGG_COMPLEMENT_AND_COAGULATION_CASCADES	19	58	4.6	0.000152491	1.12498e-06	C1QC;C9;CPB2;C9;F9;F9;KLKB1;SERPING1;CR1;KNG1;C4A;CR2;C4A;PLAT;A2M;VWF;F13A1;F2;PLAUR;F13B;KNG1;PROC;KNG1;C1R
SANA_RESPONSE_TO_IFNG_UP	16	44	5.4	0.000212767	1.64814e-06	MX1;GBP1;LGALS9;CXCL10;WARS1;SERPING1;CXCL11;STAT1;CD74;LGALS3BP;IL18BP;LAP3;GOLM1;APOL2;STAT1;GOLM1;DTX3L;ST8SIA4
HOSHIDA_LIVER_CANCER_SUBCLASS_S3	37	170	2.7	0.000214952	1.74435e-06	ISG15;ISG15;CAT;AZGP1;CD14;CPB2;KLKB1;ITIH1;SERPINA3;GHR;SERPING1;HRG;PLA2G2A;INSR;TDO2;KNG1;C4A;APOA1;GCHFR;C4A;APOH;PCK2;ADA2;ALDH2;NNMT;F2;SOD2;ASGR1;KNG1;IGF1;AOC1;KNG1;ANXA6;FAH;ALDH1A1;SOD1;AOC1;ARG1;C1R;CPA4;IMPA1;FLT4
DESERT_PERIPORTAL_HEPATOCELLULAR_CARCINOMA_SUBCLASS_UP	22	78	3.7	0.000333968	2.83337e-06	AFM;AFM;C9;AZGP1;CD14;C9;F9;F9;KLKB1;GHR;HRG;TDO2;APOA1;SCGN;PCK2;SAA4;ALDH2;IGF1;SCGN;FBP1;HAMP;FAH;FETUB;ARG1;C1R;OTC
REACTOME_DEGRADATION_OF_THE_EXTRACELLULAR_MATRIX	24	90	3.5	0.000340796	3.01701e-06	COL11A2;TLL1;KLKB1;CTSD;CTSG;MMP17;CAPN13;BSG;NID1;MMP2;CTSV;A2M;TIMP2;DCN;TPSAB1;FURIN;COL10A1;COL15A1;KLK7;TIMP1;MMP12;ELANE;CTSB;BMP1
VERHAAK_AML_WITH_NPM1_MUTATED_UP	27	110	3.1	0.00045318	4.17908e-06	CAT;CXCL10;CD300C;WARS1;CD14;LILRA1;H2BC21;H2BC21;CTSD;CTSG;HMOX1;LILRA3;TREM1;IGF2R;FTO;MMP2;LGALS3BP;LILRB2;FCGR3B;TYMP;SOD2;PLAUR;FCN1;FBP1;LILRA6;H1-2;SCPEP1;FCGR3A
ICHIBA_GRAFT_VERSUS_HOST_DISEASE_D7_UP	19	63	4.1	0.000461005	4.55734e-06	ISG15;ISG15;IFIT3;C1QC;CXCL10;WARS1;IFI16;CD14;SERPINA3;IL18R1;IL18R1;IFI16;GIMAP4;LBP;STAT1;CD74;LGALS3BP;IL1RN;CCL7;IL18BP;MSR1;PSME2;STAT1
GRAESSMANN_RESPONSE_TO_MC_AND_SERUM_DEPRIVATION_UP	24	92	3.4	0.000461005	4.59134e-06	ISG15;ISG15;MX1;ZBP1;IFIT3;CXCL10;CDON;GHR;CSF1;TMPO;RTP4;PPP1R10;STAT1;KNG1;LGALS3BP;BOC;CCL7;NCL;NNMT;SOD2;LIFR;KNG1;STAT1;IAPP;CSF1;KNG1;MYOC;FCGR3A;INHBB
BOQUEST_STEM_CELL_UP	34	158	2.6	0.000578812	5.97814e-06	FLRT2;SERPINA3;MRC2;CRABP2;PLA2G2A;ROR1;ROR1;CELF2;COLEC12;DDR2;NTRK2;MMP2;MFAP2;DCLK1;PCOLCE;LUM;FAP;PTPRD;CHL1;FMOD;DCN;SFRP4;ROBO1;CRIP1;IGF1;SFRP4;RCN3;TIMP1;ALDH1A1;CXCL12;MYOC;C1R;THBS2;GSTM3;MGP;INHBA
RUTELLA_RESPONSE_TO_CSF2RB_AND_IL4_DN	33	153	2.6	0.000726619	7.77276e-06	CXCL10;C9;CD14;HEXB;C9;CTSD;VSIG4;CD48;PLA2G7;STAT1;TREM1;CFP;FCGR1A;HEXB;AMY1A;LILRB2;CD300A;ENTPD1;PCK2;ICAM2;TIMP2;SOD2;ANXA5;FCN1;PDIA5;STAT1;FBP1;CPM;GRPEL1;FAH;S100A9;CTSB;MCL1;SNTB1;PRKCB;LTA4H
WP_COMPLEMENT_AND_COAGULATION_CASCADES	16	49	4.6	0.000746428	8.31487e-06	C1QC;C9;CPB2;C9;F9;F9;KLKB1;SERPING1;CR1;KNG1;CR2;PLAT;VWF;F2;PLAUR;F13B;KNG1;PROC;KNG1;C1R
VECCHI_GASTRIC_CANCER_ADVANCED_VS_EARLY_UP	23	89	3.3	0.000746428	8.58478e-06	ANTXR1;EPHA4;PLA2G7;NID2;EPHA4;CTHRC1;HAVCR2;DDR2;TMEM132A;FAP;MSR1;SFRP4;SOD2;COL10A1;NTM;COL15A1;THBS4;PDGFC;SFRP4;NTM;NTM;IBSP;CALD1;THBS2;MGP;INHBA;ESM1
FLECHNER_BIOPSY_KIDNEY_TRANSPLANT_REJECTED_VS_OK_UP	18	60	4.1	0.000746428	8.81066e-06	LGALS9;WARS1;LCP1;CD14;TNFRSF1B;LCP1;TNFRSF1B;VSIG4;CELF2;CD48;STAT1;UBC;GLUL;FCGR1A;LST1;ENTPD1;TYMP;FCN1;STAT1;PRKCB;FCGR3A
WANG_SMARCE1_TARGETS_UP	32	148	2.6	0.000829937	1.01025e-05	IFIT3;NUCB1;PCYOX1;WARS1;ANTXR1;CA4;GHR;ROR1;ROR1;NID2;CTHRC1;TDO2;NTRK2;NID1;MMP2;UNC5B;UNC5B;PLAT;BOC;LUM;FAP;IL1R1;TIMP2;IGFBP5;DCN;LIFR;COL15A1;PPP1R3B;UNC5B;POSTN;EDIL3;ME1;CALD1;MGP;INHBB
HOLLERN_EMT_BREAST_TUMOR_UP	21	78	3.5	0.000845713	1.06065e-05	CSF1;VIM;IL18R1;MRC2;IL18R1;FOLR2;VSIG4;DDR2;CFP;PLAT;PCOLCE;F13A1;CCL8;TIMP2;DCN;NAAA;CDH13;ST3GAL2;CSF1;CSF1R;ARL6IP5;DNM1;CSF1R;ST8SIA4
ANASTASSIOU_MULTICANCER_INVASIVENESS_SIGNATURE	15	45	4.7	0.000920398	1.19945e-05	LRRC15;NID2;MMP2;PCOLCE;LUM;FAP;COMP;DCN;SFRP4;COL10A1;NTM;SFRP4;NTM;POSTN;NTM;RCN3;THBS2;INHBA
JINESH_BLEBBISHIELD_TO_IMMUNE_CELL_FUSION_PBSHMS_DN	37	184	2.4	0.000920398	1.22222e-05	ISG15;ISG15;MX1;IFIT3;CAT;AFM;AFM;CXCL10;IFI16;ANTXR1;PRSS8;CRABP2;DPY30;DEPP1;IFI16;FTL;MYG1;GNPDA1;STAT1;RAB38;SERPINB8;CD74;IL1RN;N6AMT1;PIGR;GCHFR;ANTXR2;ICAM2;KIT;VWF;SOD2;ANXA5;APOL2;CSRP2;STAT1;FBP1;DTX3L;S100A9;FAM3B;SCPEP1;PRKCB
PICCALUGA_ANGIOIMMUNOBLASTIC_LYMPHOMA_UP	27	117	2.9	0.00102171	1.43213e-05	C1QC;CXCL10;FLRT2;ANTXR1;DEPP1;SERPING1;CTHRC1;TDO2;C4A;DDR2;DCLK1;C4A;PCOLCE;PPIC;LUM;A2M;NAGK;VWF;NNMT;IGFBP5;SMOC2;LIFR;CSRP2;COL15A1;CCL14;CXCL12;C1R;CALD1
REACTOME_DEPOSITION_OF_NEW_CENPA_CONTAINING_NUCLEOSOMES_AT_THE_CENTROMERE	6	8	28.1	0.00132021	1.94794e-05	RBBP4;H2BU1;H2BC21;H2BC12;H2BC21;H2AZ1;RUVBL1
JINESH_BLEBBISHIELD_VS_LIVE_CONTROL_DN	31	147	2.5	0.0015501	2.34431e-05	MX1;IFIT3;CAT;CXCL10;ANTXR1;SRSF7;PRSS8;PSMB4;QPCT;IGF1R;SERPINB8;CD74;ILF3;ITGAV;KIT;SUB1;SOD2;IMMP2L;SARG;CSRP2;HPRT1;GPHN;REG4;TIMP1;RPS7;DTX3L;PYGL;S100A9;CTSB;CHMP2B;CALD1
RODWELL_AGING_KIDNEY_NO_BLOOD_UP	26	114	2.8	0.00165583	2.56529e-05	C1QC;HEXB;ANTXR1;SERPING1;TNFRSF11B;CTHRC1;C4A;PIGR;HEXB;C4A;ANTXR2;LDLRAD4;LUM;A2M;MSR1;NNMT;TIMP2;TPSAB1;SPON1;RPN1;COL15A1;PDGFC;GFRA1;MFGE8;RPL12;TIMP1;C1R;INHBA
MOSERLE_IFNA_RESPONSE	8	15	10.7	0.00166978	2.64849e-05	MX1;IFIT3;GBP1;CXCL10;IFI16;DDX58;RTP4;IFI16;STAT1;STAT1
DELYS_THYROID_CANCER_DN	27	122	2.7	0.00196928	3.19618e-05	RELN;FLRT2;CA4;GHR;PLA2G7;TNFRSF11B;TNXB;KIT;ALDH2;FMOD;IGF2;DCN;ASGR1;LIFR;CSRP2;ROR2;PLA2R1;ALDH1A2;CCN1;CCL14;ALDH1A1;CPQ;SNTA1;CXCL12;MYOC;GSTM3;MGP
WP_FOLATE_METABOLISM	16	54	4	0.00198348	3.29239e-05	CAT;SAA1;MPO;SAA2;SERPINA3;SAA1;CSF1;FOLR2;INSR;APOA1;PLAT;SAA4;IL2;F2;SOD2;CSF1;CRP;SOD1
WP_COMPLEMENT_SYSTEM	20	78	3.3	0.00219697	3.7278e-05	C9;C9;KLKB1;SERPING1;VSIG4;CR1;C4A;CFP;CR2;APOA1;C4A;ICAM2;F13A1;DCN;PLAUR;FCN1;CRP;PRKCA;ELANE;IBSP;C1R;FCGR3A
REACTOME_DNA_METHYLATION	5	6	46.7	0.00272405	4.72263e-05	H2BU1;H2BC21;H2BC12;H2BC21;H2AZ1;H3C1
REACTOME_HDACS_DEACETYLATE_HISTONES	8	16	9.4	0.00273785	4.84755e-05	RBBP4;H2AC1;H2BU1;H2BC21;H2BC12;H2BC21;H2AC11;H2AW;H3C1
SATO_SILENCED_BY_METHYLATION_IN_PANCREATIC_CANCER_1	37	196	2.2	0.00281505	5.2354e-05	MX1;SAA1;RBP4;CLEC11A;DHX58;SAA1;CLEC11A;CSF1;RBP4;MRC2;CRABP2;DEPP1;QPCT;B4GALT6;CCL17;RAB38;CD74;UPP1;CDH17;PLAT;NETO2;CDH3;STC1;IL1R1;IGF2;SOD2;PLAUR;SPON1;HYAL1;CCL22;HPGDS;CSF1;MIA;TPST1;MGAT3;RCN3;CCL22;CXCL12;SNTB1;SPINT1;NRGN;OBP2B
REACTOME_PRC2_METHYLATES_HISTONES_AND_DNA	6	9	18.7	0.00281505	5.36245e-05	RBBP4;H2BU1;H2BC21;H2BC12;H2BC21;H2AZ1;H3C1
REACTOME_ERCC6_CSB_AND_EHMT2_G9A_POSITIVELY_REGULATE_RRNA_EXPRESSION	6	9	18.7	0.00281505	5.36245e-05	RBBP4;H2BU1;H2BC21;H2BC12;H2BC21;H2AZ1;H3C1
NAKAYAMA_SOFT_TISSUE_TUMORS_PCA1_UP	16	56	3.8	0.00281505	5.39957e-05	CXCL10;CD14;VSIG4;FCGR1A;LUM;FAP;NNMT;F13A1;HSPA6;DCN;BIN2;CSF1R;SIGLEC1;TIMP1;CSF1R;THBS2;FCGR3A
HOSHIDA_LIVER_CANCER_SUBCLASS_S1	29	140	2.5	0.00309022	6.04137e-05	LGALS9;LCP1;IFI16;TNFRSF1B;LCP1;CRABP2;TNFRSF1B;IFI16;CELF2;CD48;IL15RA;DDR2;CD74;DDR1;LGALS3BP;DDR1;PPIC;LUM;F13A1;TIMP2;IGFBP5;PLAUR;ANXA5;COL15A1;ACP5;CCN1;POSTN;ME1;PKD2;RNASE1;MGP;ARPC2;S100A13
ROY_WOUND_BLOOD_VESSEL_UP	11	30	5.4	0.00317976	6.54799e-05	GBP1;NID2;LUM;STC1;HYAL1;CCN1;POSTN;ANXA6;TIMP1;BMP1;ATG4A
CASTELLANO_NRAS_TARGETS_UP	11	30	5.4	0.00317976	6.54799e-05	ISG15;ISG15;B2M;ITIH2;IFI16;CLEC11A;CLEC11A;CRABP2;IFI16;LBP;STAT1;IL1RN;STAT1;B2M;PENK;MGP
REACTOME_FORMATION_OF_FIBRIN_CLOT_CLOTTING_CASCADE	12	35	4.9	0.00317976	6.5683e-05	F9;F9;KLKB1;SERPING1;PRTN3;KNG1;PRTN3;A2M;VWF;F13A1;F2;F13B;KNG1;PROC;KNG1;GP5
SMITH_TERT_TARGETS_DN	16	57	3.7	0.00317986	6.84206e-05	CAT;SAA1;SAA1;UGP2;SERPING1;NID2;MMP2;IL1RN;PCNA;CDSN;A2M;TRADD;L1CAM;CPOX;FAH;CHMP1A;OAT
BOYLAN_MULTIPLE_MYELOMA_C_D_DN	29	141	2.5	0.00317986	6.92038e-05	ZBP1;IFI16;HID1;MPO;SERPINA3;HP;HP;CD226;IL18R1;RTP4;SEMA4A;PRTN3;IL18R1;CTSG;IFI16;GIMAP4;IGF1R;PRTN3;CFP;UPP1;ENTPD1;KIT;F13A1;TPSAB1;APOL2;SPON1;OLFM4;CAMP;CAMP;PYGL;S100A9;ELANE;SNTB1;PRG2
LIAN_NEUTROPHIL_GRANULE_CONSTITUENTS	9	21	7	0.00318899	7.37493e-05	MPO;CTSD;CTSG;CTSV;CTSH;CAMP;GUSB;CAMP;ELANE;CTSB
REACTOME_INTRINSIC_PATHWAY_OF_FIBRIN_CLOT_FORMATION	9	21	7	0.00318899	7.37493e-05	F9;F9;KLKB1;SERPING1;KNG1;A2M;VWF;F2;KNG1;PROC;KNG1;GP5
DAUER_STAT3_TARGETS_DN	9	21	7	0.00318899	7.37493e-05	ISG15;ISG15;MX1;IFIT3;HSPA1A;DDX58;STAT1;HSPA1A;HSPA1A;HSPA1A;HSPA1A;LAP3;HSPA6;STAT1;HSPA1A;HSPA1B;ST8SIA4;HSPA1A
KEGG_CYTOKINE_CYTOKINE_RECEPTOR_INTERACTION	41	229	2.1	0.00318899	7.41078e-05	IFNL1;CXCL10;TNFRSF1B;GHR;CSF1;IL18R1;TNFRSF1B;CXCL11;IL18R1;TNFRSF10B;TNFRSF11B;IL15RA;CCL17;IL22RA1;IL12RB1;IFNA4;KITLG;IFNL3;TNFRSF8;IL22RA2;TNFSF13B;IL22RA2;CCL7;IL1R1;KIT;IFNA7;CCL8;IL2;IFNA1;LIFR;PDGFC;TNFRSF10B;CNTFR;CCL22;CSF1;CSF1R;BMP7;CCL14;PRL;CSF1R;CCL22;CXCL12;PRL;FLT1;FLT1;TNFRSF10A;FLT4;EPO;INHBA;INHBB
RUTELLA_RESPONSE_TO_HGF_VS_CSF2RB_AND_IL4_UP	38	207	2.2	0.00329979	7.80827e-05	CXCL10;C9;CD14;HEXB;C9;CTSD;VSIG4;CD48;PLA2G7;FTH1;STAT1;TREM1;MMP2;MATK;FCGR1A;HEXB;AMY1A;LILRB2;CD300A;ENTPD1;PCK2;ICAM2;CCL8;TIMP2;SOD2;ANXA5;FCN1;PDIA5;ACP5;STAT1;FBP1;TPST1;CPM;GRPEL1;FAH;S100A9;CTSB;ME1;SNTB1;PRKCB;LTA4H
REACTOME_DEFECTS_OF_CONTACT_ACTIVATION_SYSTEM_CAS_AND_KALLIKREIN_KININ_SYSTEM_KKS	7	13	10.9	0.00329979	8.08125e-05	F9;F9;KLKB1;SERPING1;VWF;F2;TPST1;GP5
REACTOME_COMPLEMENT_CASCADE	15	52	3.8	0.00329979	8.15513e-05	C1QC;C9;CPB2;C9;SERPING1;CR1;C4A;CFP;CR2;C4A;F2;FCN1;FCN3;CFHR1;FCN3;CRP;ELANE;C1R
JECHLINGER_EPITHELIAL_TO_MESENCHYMAL_TRANSITION_UP	15	52	3.8	0.00329979	8.15513e-05	ISG15;ISG15;IFIT3;B2M;VIM;PLA2G7;STAT1;DDR2;MMP2;UPP1;TNXB;PCOLCE;PPIC;DCN;STAT1;B2M;MMP12;INHBA
BROWNE_INTERFERON_RESPONSIVE_GENES	11	31	5.2	0.00369519	9.26865e-05	ISG15;ISG15;MX1;IFIT3;GBP1;CXCL10;WARS1;NMI;STAT1;IL15RA;CCL8;TYMP;STAT1
REACTOME_REGULATION_OF_INSULIN_LIKE_GROWTH_FACTOR_IGF_TRANSPORT_AND_UPTAKE_BY_INSULIN_LIKE_GROWTH_FACTOR_BINDING_PROTEINS_IGFBPS	22	96	2.8	0.00386412	9.83491e-05	ITIH2;NUCB1;KLK13;CSF1;CTSG;KNG1;C4A;MMP2;TMEM132A;APOA1;C4A;VWA1;IGFBP5;GOLM1;IGF2;PRKCSH;F2;KNG1;IGF1;GOLM1;PROC;MFGE8;CSF1;KNG1;CCN1;TIMP1;PENK
SENGUPTA_NASOPHARYNGEAL_CARCINOMA_UP	27	130	2.5	0.00394167	0.000102687	GBP1;CXCL10;CD14;TMPO;CXCL11;RACGAP1;PLA2G7;TNFRSF10B;B4GALT6;STAT1;HAVCR2;NID1;FCGR1A;KITLG;PCNA;EFNB2;ADAM23;ITGAV;FCGR3B;ROBO1;ADAM22;COL15A1;TNFRSF10B;STAT1;UNG;HNRNPA2B1;POSTN;CALD1;INHBA
KAAB_HEART_ATRIUM_VS_VENTRICLE_UP	28	137	2.4	0.00394167	0.000103231	NUCB1;RELN;FLRT2;MDK;VIM;EPHA4;PLA2G2A;MGAT5;NPPA;EPHA4;KHSRP;DDR2;NTRK2;SERPINB8;DDR1;DDR1;UNC5B;EPHB2;UNC5B;IL1R1;COMP;CHL1;FMOD;CRIP1;ROR2;UNC5B;ALDH1A2;IL1RL1;CCL14;ME1;C1R;S100A13
WP_VITAMIN_B12_METABOLISM	13	42	4.2	0.0041207	0.000109439	SAA1;MPO;SAA2;SERPINA3;SAA1;TCN2;INSR;APOA1;PLAT;SAA4;F2;SOD2;CRP;SOD1
REACTOME_HCMV_LATE_EVENTS	9	22	6.5	0.00423858	0.000114134	H2AC1;H2BU1;H2BC21;H2BC12;H2BC21;H2AC11;H2AW;H3C1;CHMP2B;CHMP1A
TAKEDA_TARGETS_OF_NUP98_HOXA9_FUSION_8D_DN	23	104	2.7	0.00449987	0.000122829	C1QC;C9;CD14;C9;ANTXR1;PLA2G7;CR1;CLEC7A;TDO2;COLEC12;IGF2R;GLUL;ENTPD1;ALDH2;SRSF6;FCN1;AOC1;MMP12;PYGL;AOC1;S100A9;CTSB;ME1;RNASE1;DEFA1
SERVITJA_LIVER_HNF1A_TARGETS_DN	21	91	2.8	0.0045798	0.000126701	AFM;AFM;C9;LCP1;CPB2;SAA2;C9;LCP1;ITIH1;SERPING1;HRG;ROR1;ROR1;PIGR;SCARA5;IL1R1;SAA4;F13B;LIFR;IGF1;PDGFC;FGFR4;CRP;C1R;SERPINA12
WESTON_VEGFA_TARGETS_6HR	11	32	4.9	0.0046012	0.00012899	NID2;MMP2;CCL7;FAP;NNMT;CFHR1;ROR2;FBP1;UNG;POSTN;MGP
REACTOME_SIRT1_NEGATIVELY_REGULATES_RRNA_EXPRESSION	5	7	23.4	0.00528376	0.000152022	H2BU1;H2BC21;H2BC12;H2BC21;H2AZ1;H3C1
MIKKELSEN_MCV6_LCP_WITH_H3K4ME3	17	67	3.2	0.00552247	0.000162303	ZBP1;LGALS9;WARS1;LBP;SERPINB8;LGALS3BP;SCARA5;PCOLCE;LST1;MUC1;RORC;ROBO4;AOC1;ALDH1A1;AOC1;BTC;RNASE1;ACY3
TARTE_PLASMA_CELL_VS_PLASMABLAST_UP	36	199	2.1	0.00552247	0.000162965	MX1;LGALS9;B2M;MPO;SERPINA3;MDK;CSF1;HP;HP;CRABP2;SERPING1;FTL;QPCT;CR1;MERTK;TCN2;C4A;DDR2;DDR1;DDR1;C4A;CDSN;TNXB;PCOLCE;LST1;FCGR3B;ALDH2;FMOD;FCN1;CCL22;FBP1;CSF1;B2M;ALDH1A1;S100A9;ELANE;CCL22;CXCL12;PSAP;SGSH;RNASE1;FLT4
ZHAN_MULTIPLE_MYELOMA_DN	11	33	4.7	0.00591466	0.00017672	PLA2G7;LST1;A2M;CTSH;ALDH1A1;GP5;PYGL;S100A9;ELANE;CXCL12;DEFA1
KAAB_FAILED_HEART_VENTRICLE_DN	8	19	6.8	0.00713159	0.000218341	ISG15;ISG15;WARS1;CD14;SERPINA3;F13A1;PSME2;CSRP2;FCN3;FCN3
UROSEVIC_RESPONSE_TO_IMIQUIMOD	6	11	11.2	0.00791122	0.000248471	ISG15;ISG15;MX1;CXCL11;STAT1;MICB;MICB;CCL8;STAT1
CUI_TCF21_TARGETS_UP	9	24	5.6	0.00791122	0.000250965	MDK;IGDCC4;EPHA4;EPHA4;LBP;LUM;FAP;DCN;PENK;HOMER2
REACTOME_ACTIVATION_OF_MATRIX_METALLOPROTEINASES	10	29	4.9	0.00791498	0.000254003	KLKB1;CTSG;MMP17;MMP2;CTSV;TIMP2;TPSAB1;FURIN;TIMP1;ELANE
HOWLIN_PUBERTAL_MAMMARY_GLAND	12	40	4	0.00849204	0.000278787	IFI16;IFI16;CCL7;CPXM1;MSR1;CCL8;SFRP4;SFRP4;S100A9;CTSB;CXCL12;PENK;THBS2;INHBB
WP_HIPPO_SIGNALING_REGULATION_PATHWAYS	16	64	3.1	0.00909728	0.000302012	CDH20;IGF1R;INSR;PRKCZ;NTRK2;CDH17;TEAD3;CDH3;KIT;CDH13;CSF1R;FGFR4;PRKCA;CSF1R;FLT1;FLT1;PRKCB;FLT4
MARKEY_RB1_ACUTE_LOF_DN	29	153	2.2	0.00920761	0.000309139	ISG15;ISG15;IFIT3;C1QC;CXCL10;CD300C;LCP1;IFI16;LCP1;HP;HP;CRABP2;SERPING1;AGRN;IFI16;PLA2G7;STAT1;CFP;LGALS3BP;FCGR1A;LST1;CCL7;CPXM1;IL18BP;CCL8;IGFBP5;PSME2;SOD2;CTSH;STAT1;ALDH1A2;CSF1R;CTSB;CSF1R;H1-2
KEGG_ECM_RECEPTOR_INTERACTION	14	52	3.5	0.00920761	0.000312468	COL11A2;RELN;AGRN;CHAD;ITGB7;TNXB;ITGAV;COMP;VWF;THBS3;THBS4;GP5;IBSP;THBS2
TAKEDA_TARGETS_OF_NUP98_HOXA9_FUSION_3D_UP	17	71	3	0.0100323	0.000344155	ISG15;ISG15;MX1;IFIT3;GBP1;CXCL10;IFI16;DDX58;CLSTN3;SERPING1;FCRL4;CTSG;IFI16;STAT1;LGALS3BP;PTPRD;STAT1;REN;DTX3L;ALDH1A1
ZHENG_IL22_SIGNALING_UP	12	41	3.9	0.0102697	0.000359877	CD14;HP;HP;DSC2;PLAT;SLITRK1;SLITRK1;CCL8;OLR1;TTC9;TIMP1;S100A9;ARG1;INHBA
MOREAUX_MULTIPLE_MYELOMA_BY_TACI_UP	30	162	2.2	0.0103509	0.000372065	AZGP1;COL11A2;SIGLEC7;FLRT2;KLK13;LRRC15;MRC2;NPPA;CR1;KHSRP;IL22RA1;DDR1;TNFRSF8;DDR1;GCHFR;IL18BP;SAA4;HSPA6;FMOD;FURIN;PLAUR;ROBO4;EPHB6;HAMP;SEMA4G;PYGL;SNTA1;FAM189A2;ARG1;VASP;RNASE1
SABATES_COLORECTAL_ADENOMA_DN	30	162	2.2	0.0103509	0.000372065	FLRT2;PLAAT2;CA4;GHR;GFRA3;CTSG;CD48;CHAD;COLEC12;KNG1;UGT2B15;CR2;CNTN4;SCARA5;SCGN;PYY;LYVE1;F13A1;CCL8;BCHE;LIFR;CEACAM7;KNG1;IGF1;SCGN;ANGPTL1;L1CAM;BCHE;KNG1;SIGLEC1;CPM;EDIL3;CXCL12;PRKCB
VART_KSHV_INFECTION_ANGIOGENIC_MARKERS_UP	26	133	2.3	0.0103509	0.000379221	CXCL10;EPHA4;CXCL11;EPHA10;HMOX1;EPHA4;EPHA6;MMP2;EFNB2;PLAT;ITGAV;TIMP2;IFNA1;SFRP4;PLAUR;COL15A1;IGF1;ANGPTL1;DLL4;SFRP4;ROBO4;CCN1;TIMP1;PRL;CXCL12;PRL;FLT1;FLT1;THBS2;FLT4
KIM_GLIS2_TARGETS_UP	15	59	3.2	0.0103509	0.000380689	ISG15;ISG15;CXCL10;VIM;NID1;CD74;MFAP2;TNFSF13B;LUM;CCL8;DCN;SPON1;COL15A1;POSTN;CXCL12;MGP
REACTOME_DNA_REPLICATION_PRE_INITIATION	13	47	3.6	0.0103509	0.00038181	H2BU1;H2BC21;H2BC12;H2BC21;PSMA2;PSMB4;CDK2;H2AZ1;UBC;H3C1;PSMB1;PSME2;PSMD6;PSMA7
REACTOME_RMTS_METHYLATE_HISTONE_ARGININES	6	12	9.4	0.0117796	0.000456237	H2AC1;H2AC11;H2AW;H2AZ1;WDR5;H3C1
REACTOME_MEIOTIC_RECOMBINATION	6	12	9.4	0.0117796	0.000456237	H2BU1;H2BC21;H2BC12;H2BC21;CDK2;H2AZ1;H3C1
NAKAMURA_ADIPOGENESIS_LATE_DN	9	26	5	0.0128361	0.000501889	AIMP1;ITGAV;COL15A1;CCN1;POSTN;EDIL3;CXCL12;CALD1;THBS2
WIELAND_UP_BY_HBV_INFECTION	15	61	3.1	0.0140475	0.000559965	GBP1;B2M;CXCL10;WARS1;IFI16;IFI16;VSIG4;CD48;STAT1;CD74;FCGR1A;ADA2;LAP3;PSME2;SOD2;STAT1;B2M;CTSB
CAIRO_HEPATOBLASTOMA_DN	28	151	2.2	0.0140475	0.0005648	C9;AZGP1;CD14;C9;F9;F9;GHR;UGP2;HP;HP;HGFAC;SERPING1;HRG;HGFAC;VSIG4;SHBG;DCPS;TDO2;SERPINB8;CFP;PCK2;SAA4;LYVE1;NNMT;IGF1;FCN3;FBP1;FCN3;CRP;FETUB;C1R;MCL1;INHBB
LINDSTEDT_DENDRITIC_CELL_MATURATION_A	13	49	3.4	0.0146337	0.000593771	ISG15;ISG15;GBP1;CXCL10;CXCL11;CD48;PLA2G7;STAT1;IL1RN;PLAT;ENTPD1;CCL8;SOD2;STAT1;INHBA
IGLESIAS_E2F_TARGETS_UP	19	88	2.6	0.0156982	0.000642753	C1QC;B2M;LCP1;LCP1;NID2;CD74;MFAP2;NPTN;KITLG;PCNA;DSTN;LUM;IGFBP5;DCN;COL15A1;CRIP1;B2M;HNRNPA2B1;POSTN;PKD2;S100A13
LENAOUR_DENDRITIC_CELL_MATURATION_UP	17	75	2.8	0.0163356	0.0006809	CAT;CSF1;CRABP2;CR1;CCL17;CD74;LGALS3BP;PPIC;A2M;F13A1;CCL22;PCBD1;CSF1;MMP12;CCL22;PKD2;RNASE1;OAT;INHBA
MISSIAGLIA_REGULATED_BY_METHYLATION_UP	17	75	2.8	0.0163356	0.0006809	ISG15;ISG15;LGALS9;H2BC12;PRSS8;PMEL;STAT1;PLAT;IGF2;SOD2;PLAUR;HYAL1;STAT1;MFGE8;ARL6IP5;TIMP1;CTSB;PSAP;SPINT1
APPEL_IMATINIB_RESPONSE	9	27	4.7	0.0163801	0.000688797	HEXB;CTSD;HEXB;CD300A;MSR1;CTSH;ACP5;GUSB;LILRA6;CTSB
LEE_LIVER_CANCER_MYC_E2F1_DN	11	38	3.8	0.0164824	0.000699179	GHR;TDO2;NETO2;IGF1;CFHR1;ALAD;CPOX;ELANE;ME1;OAT;OTC
YAGI_AML_WITH_T_9_11_TRANSLOCATION	14	56	3.1	0.0166069	0.000710585	WARS1;RUVBL1;FCGR1A;EFNB2;ADAM23;DSTN;LDLRAD4;MUSK;LUM;F2;GFRA1;FCN3;FCN3;PENK;FLT1;FLT1
JISON_SICKLE_CELL_DISEASE_UP	22	110	2.4	0.0175649	0.000758058	MX1;IFIT3;GBP1;NUCB1;CXCL10;MPO;SERPING1;CTSG;HMOX1;VSIG4;GNPDA1;STAT1;TCN2;FCGR1A;EPHB2;PCK2;MICB;MICB;F13A1;TYMP;PSME2;STAT1;TIMP1;ELANE
MARTINELLI_IMMATURE_NEUTROPHIL_UP	5	9	11.7	0.017577	0.000772057	MPO;CTSG;CAMP;CAMP;ELANE;DEFA1
REACTOME_ASSEMBLY_OF_THE_ORC_COMPLEX_AT_THE_ORIGIN_OF_REPLICATION	5	9	11.7	0.017577	0.000772057	H2BU1;H2BC21;H2BC12;H2BC21;H2AZ1;H3C1
LY_AGING_MIDDLE_UP	6	13	8	0.017577	0.000778029	TNFRSF11B;COMP;FMOD;COL15A1;MMP12;THBS2
BLANCO_MELO_COVID19_SARS_COV_2_POS_PATIENT_LUNG_TISSUE_UP	18	83	2.6	0.0187595	0.000837291	ISG15;ISG15;MX1;ZBP1;IFIT3;CXCL10;LCP1;RBP4;H2BC21;H2BC21;LCP1;HSH2D;RBP4;RTP4;TREM1;TPSB2;IL1RN;TNFSF13B;CCL7;CCL8;OLR1;HAMP
CAIRO_HEPATOBLASTOMA_CLASSES_DN	22	111	2.3	0.0191363	0.000861169	B2M;CAT;AFM;AFM;GHR;SERPING1;GLUL;IL1R1;ALDH2;DCN;GABARAPL1;PSME2;SPON1;WFDC1;CSRP2;IGF1;TRADD;B2M;ARL6IP5;TTC9;HSPB6;FAM189A2;C1R;HOMER2
GRAHAM_CML_QUIESCENT_VS_NORMAL_DIVIDING_UP	11	39	3.7	0.0194554	0.000889884	GBP1;CXCL10;TRA2B;CXCL11;IL1RN;CCL8;TPSAB1;SOD2;SMC3;H1-2;INHBA
LEE_LIVER_CANCER_MYC_DN	11	39	3.7	0.0194554	0.000889884	SERPINA3;TDO2;NETO2;PCOLCE;IL1R1;HSPH1;IGF2;IGF1;CFHR1;ELANE;OTC
WU_APOPTOSIS_BY_CDKN1A_NOT_VIA_TP53	3	3	Inf	0.0196746	0.000914424	F9;F9;AIMP1;CCN1
VERHAAK_GLIOBLASTOMA_MESENCHYMAL	24	126	2.2	0.0197613	0.000925743	LCP1;CD14;TNFRSF1B;HEXB;SIGLEC7;LCP1;MRC2;TNFRSF1B;FOLR2;IL15RA;DSC2;HEXB;LILRB2;IL1R1;MSR1;TYMP;FURIN;PLAUR;TRADD;PLS3;TIMP1;LILRA6;PYGL;CPQ;CTSB;SCPEP1;S100A13
BOYLAN_MULTIPLE_MYELOMA_PCA1_UP	15	64	2.9	0.0202304	0.000961217	ZBP1;IFI16;MPO;SERPINA3;HP;HP;IL18R1;PRTN3;IL18R1;CTSG;IFI16;GIMAP4;PRTN3;APOL2;SPON1;CAMP;CAMP;S100A9;ELANE;PRG2
HAN_JNK_SINGALING_UP	7	18	6	0.0202304	0.000970104	ISG15;ISG15;IFIT3;CXCL10;EFNB2;IL1RL1;CCN1;PRL;PRL
KIM_LRRC3B_TARGETS	7	18	6	0.0202304	0.000970104	ISG15;ISG15;B2M;C9;IFI16;C9;IFI16;FTH1;CD74;PSME2;B2M
REACTOME_TRANSCRIPTIONAL_REGULATION_BY_RUNX1	20	98	2.4	0.020471	0.000996743	H2BU1;H2BC21;H2BC12;H2BC21;PSMA2;PSMB4;DPY30;H2AZ1;CR1;UBC;WDR5;SERPINB13;H3C1;CTSV;PSMB1;IL2;PSME2;LIFR;PSMD6;PSMA7;PRKCB
KORKOLA_YOLK_SAC_TUMOR	10	34	3.9	0.0214862	0.00106202	PRTG;MDK;NMI;APOA1;LUM;CTSV;DCN;ROR2;C1R;MGP
LIAN_LIPA_TARGETS_3M	10	34	3.9	0.0214862	0.00106202	C1QC;HMOX1;PLA2G7;CFP;MSR1;ACP5;CAMP;MMP12;CAMP;S100A9;CTSB
REACTOME_RUNX1_REGULATES_TRANSCRIPTION_OF_GENES_INVOLVED_IN_DIFFERENTIATION_OF_HSCS	12	46	3.3	0.0225405	0.00112615	H2BU1;H2BC21;H2BC12;H2BC21;PSMA2;PSMB4;H2AZ1;UBC;H3C1;PSMB1;PSME2;PSMD6;PSMA7
XU_HGF_TARGETS_INDUCED_BY_AKT1_6HR	4	6	18.7	0.0225405	0.00113077	ISG15;ISG15;MX1;PLAUR;CCN1
YAUCH_HEDGEHOG_SIGNALING_PARACRINE_UP	15	65	2.8	0.0225587	0.00114	HSPA1A;RELN;PRTN3;KNG1;NTRK2;PRTN3;HSPA1A;SCARA5;NOG;HSPA1A;HSPA1A;HSPA1A;BCHE;IGFBP5;COL10A1;SPON1;KNG1;CCL22;NOG;BCHE;KNG1;BMP7;HSPA1A;SUMF2;HSPA1B;CCL22;PENK;HSPA1A
MIKKELSEN_MEF_LCP_WITH_H3K4ME3	14	59	2.9	0.0235417	0.00123724	LGALS9;WARS1;SERPINB8;DDR1;LGALS3BP;IL1RN;DDR1;PCOLCE;CAPG;CCL7;LUM;NNMT;POSTN;BTC;INHBA
SANA_TNF_SIGNALING_UP	14	59	2.9	0.0235417	0.00123724	MX1;GBP1;LGALS9;CXCL10;CSF1;CXCL11;FTH1;CTHRC1;LGALS3BP;ITGAV;CCL7;CCL8;SOD2;CSF1;INHBA
BROWN_MYELOID_CELL_DEVELOPMENT_DN	14	59	2.9	0.0235417	0.00123724	F9;F9;SERPINA3;SRSF7;ERH;MGAT5;CD48;CDH17;NCL;HSPH1;PDIA5;NT5C3B;TIMM8A;SOD1;NRGN
ACEVEDO_LIVER_TUMOR_VS_NORMAL_ADJACENT_TISSUE_DN	22	114	2.3	0.0235417	0.00124639	AFM;AFM;C9;AZGP1;C9;F9;RELN;F9;KLKB1;GHR;CTSD;DEPP1;HGFAC;HGFAC;SHBG;DCPS;RAB26;A2M;SAA4;IGF2;FGL1;FCN3;FBP1;PROC;FCN3;HAMP;ARG1
CHIANG_LIVER_CANCER_SUBCLASS_INTERFERON_UP	6	14	7	0.0235417	0.00125046	ISG15;ISG15;PLA2G2A;STAT1;TDO2;NNMT;STAT1;FCGR3A
TURASHVILI_BREAST_LOBULAR_CARCINOMA_VS_LOBULAR_NORMAL_DN	10	35	3.8	0.0254213	0.00135968	LRRC15;CTHRC1;MMP2;RAB26;COMP;SFRP4;COL10A1;THBS4;SFRP4;POSTN;THBS2
LIAN_LIPA_TARGETS_6M	11	41	3.4	0.0258621	0.00140101	C1QC;HMOX1;PLA2G7;CFP;MSR1;ACP5;CAMP;MMP12;CAMP;S100A9;CTSB;FCGR3A
VANASSE_BCL2_TARGETS_UP	7	19	5.5	0.0258621	0.00140863	HSPA1A;RELN;SERPING1;KNG1;HSPA1A;IL1RN;HSPA1A;HSPA1A;HSPA1A;LIFR;KNG1;KNG1;HSPA1A;HSPA1B;H1-2;HSPA1A
REACTOME_CONDENSATION_OF_PROPHASE_CHROMOSOMES	5	10	9.3	0.0258621	0.00142107	H2BU1;H2BC21;H2BC12;H2BC21;H2AZ1;H3C1
CHIARADONNA_NEOPLASTIC_TRANSFORMATION_CDC25_UP	16	73	2.6	0.0258621	0.00142142	IFI16;CSF1;IFI16;NID1;EFNB2;IL1R1;PSPC1;IGF2;SMOC2;SRSF6;PLA2R1;CSF1;TPST1;IL1RL1;PRL;CTSB;PRL;THBS2;MGP
YAMAZAKI_TCEB3_TARGETS_UP	18	87	2.5	0.0269069	0.00148876	B2M;WARS1;GHR;SERPING1;NID2;NID1;GLUL;TLNRD1;PLAT;CTSV;KIT;FURIN;MFGE8;SEMA6A;CCN1;B2M;FAM189A2;PSAP;TNFRSF10A
WP_COMPLEMENT_SYSTEM_IN_NEURONAL_DEVELOPMENT_AND_PLASTICITY	15	67	2.7	0.0280907	0.00158234	C1QC;C9;C9;SERPING1;CR1;MERTK;COLEC12;PRKCZ;C4A;CFP;CR2;C4A;ITGAV;FCN1;FCN3;FCN3;MFGE8;C1R
JAATINEN_HEMATOPOIETIC_STEM_CELL_DN	25	139	2.1	0.0299929	0.00171483	CD14;EPHA4;GIMAP4;QPCT;EPHA4;CLEC7A;FBLN7;IGF2R;NID1;UPP1;IL1RN;FCGR3B;F13A1;GABARAPL1;CTSH;FCN1;OLFM4;TRABD2A;PRKCA;S100A9;CTSB;ARG1;PSAP;SGSH;CALD1;DEFA1
MOREAUX_B_LYMPHOCYTE_MATURATION_BY_TACI_UP	11	42	3.3	0.0301493	0.00173489	AZGP1;COL11A2;MRC2;NPPA;KHSRP;DDR1;DDR1;FMOD;PLAUR;EPHB6;PYGL;SNTA1
MCGARVEY_SILENCED_BY_METHYLATION_IN_COLON_CANCER	8	25	4.4	0.0307098	0.00184374	INHA;EPHA4;EPHA4;SFRP5;CHL1;SFRP4;POMC;SFRP4;GSTM3;INHBB
YAO_TEMPORAL_RESPONSE_TO_PROGESTERONE_CLUSTER_2	8	25	4.4	0.0307098	0.00184374	CDON;SRSF7;RBM39;TNXB;PLA2R1;MMP12;FUBP1;THBS2
NAKAMURA_ADIPOGENESIS_EARLY_DN	8	25	4.4	0.0307098	0.00184374	TNFRSF11B;ITGAV;COL15A1;CCN1;POSTN;EDIL3;CALD1;THBS2
REACTOME_SIGNALING_BY_NOTCH	20	103	2.3	0.0307098	0.00188864	H2BU1;H2BC21;H2BC12;H2BC21;PSMA2;MDK;PSMB4;H2AZ1;STAT1;CNTN1;UBC;H3C1;PSMB1;PSME2;FURIN;PSMD6;STAT1;POFUT1;DLL4;PSMA7;YBX1;FLT4
REACTOME_RESPONSE_TO_ELEVATED_PLATELET_CYTOSOLIC_CA2	20	103	2.3	0.0307098	0.00188864	SERPINA4;SERPINA4;SERPINA3;SERPING1;HRG;KNG1;LGALS3BP;APOA1;APOH;A2M;VWF;F13A1;IGF2;ANXA5;KNG1;IGF1;KNG1;TIMP1;SOD1;PRKCA;PSAP;LEFTY2;PRKCB
DER_IFN_BETA_RESPONSE_UP	13	55	2.9	0.0307098	0.00190032	ISG15;ISG15;MX1;IFIT3;GBP1;B2M;RBBP4;IFI16;IFI16;NMI;STAT1;XRCC6;PLAUR;STAT1;B2M;FUBP1;CALD1
REACTOME_SCAVENGING_BY_CLASS_A_RECEPTORS	6	15	6.2	0.0307098	0.00191441	FTL;FTH1;COLEC12;APOA1;SCARA5;MSR1
BIOCARTA_INTRINSIC_PATHWAY	6	15	6.2	0.0307098	0.00191441	F9;F9;KLKB1;SERPING1;KNG1;F2;KNG1;PROC;KNG1
BIOCARTA_LONGEVITY_PATHWAY	6	15	6.2	0.0307098	0.00191441	CAT;GHR;IGF1R;SOD2;IGF1;SOD1
TONKS_TARGETS_OF_RUNX1_RUNX1T1_FUSION_ERYTHROCYTE_UP	17	82	2.5	0.0309164	0.00194858	IFI16;LILRA1;IFI16;VSIG4;STAT1;TREM1;UPP1;DDR1;FCGR1A;IL1RN;DDR1;PLAT;NETO2;CCL7;STAT1;ALDH1A2;OLR1;CPM;ELANE;NTS
ICHIBA_GRAFT_VERSUS_HOST_DISEASE_35D_UP	18	89	2.4	0.0309164	0.00195009	C1QC;WARS1;CD14;SERPINA3;PRTN3;LBP;STAT1;PRTN3;CFP;CD74;FCGR1A;IL18BP;MSR1;NNMT;SMOC2;STAT1;CSF1R;CAMP;MMP12;CAMP;S100A9;CSF1R
WP_TRYPTOPHAN_METABOLISM	7	20	5	0.0309697	0.00198772	CAT;WARS1;TDO2;ALDH2;ALDH1A2;AOC1;ALDH1A1;AOC1
LI_WILMS_TUMOR_VS_FETAL_KIDNEY_2_UP	7	20	5	0.0309697	0.00198772	HEXB;CRABP2;H2AZ1;EFNB3;HEXB;IGF2;IGF1;ROR2
REACTOME_MITOTIC_PROPHASE	9	31	3.8	0.0318338	0.00207841	H2BU1;H2BC21;H2BC12;H2BC21;TMPO;H2AZ1;H3C1;NEK7;PRKCA;PRKCB
TURASHVILI_BREAST_DUCTAL_CARCINOMA_VS_LOBULAR_NORMAL_UP	9	31	3.8	0.0318338	0.00207841	IFIT3;LRRC15;RACGAP1;VOPP1;CTHRC1;UNC5B;UNC5B;SFRP4;COL10A1;UNC5B;SFRP4;INHBA
WP_SPINAL_CORD_INJURY	18	90	2.4	0.0338501	0.00222254	CXCL10;VIM;EPHA4;PLA2G2A;CDK2;KLK8;EPHA4;EFNB2;LILRB2;TNFSF13B;OMG;IL1R1;NTN1;IL2;SEMA6A;LILRA6;MMP12;PRKCA;ARG1
REACTOME_ACTIVATED_PKN1_STIMULATES_TRANSCRIPTION_OF_AR_ANDROGEN_RECEPTOR_REGULATED_GENES_KLK2_AND_KLK3	5	11	7.8	0.0354765	0.00239824	H2BU1;H2BC21;H2BC12;H2BC21;H2AZ1;H3C1
BOWIE_RESPONSE_TO_EXTRACELLULAR_MATRIX	5	11	7.8	0.0354765	0.00239824	ISG15;ISG15;MX1;IFIT3;IFI16;IFI16;STAT1;STAT1
BOWIE_RESPONSE_TO_TAMOXIFEN	5	11	7.8	0.0354765	0.00239824	ISG15;ISG15;MX1;IFIT3;IFI16;IFI16;STAT1;STAT1
REACTOME_DEFECTIVE_FACTOR_VIII_CAUSES_HEMOPHILIA_A	4	7	12.4	0.0354765	0.00243576	F9;F9;VWF;F2;TPST1
SANCHEZ_MDM2_TARGETS	4	7	12.4	0.0354765	0.00243576	H2BC21;H2BC21;IL1RN;TIMP1;INHBB
REACTOME_HCMV_EARLY_EVENTS	8	26	4.2	0.0354765	0.00244012	RBBP4;H2AC1;H2BU1;H2BC21;H2BC12;H2BC21;H2AC11;H2AW;H3C1
LIU_SMARCA4_TARGETS	8	26	4.2	0.0354765	0.00244012	LGALS9;CSF1;MMP2;UPP1;LGALS3BP;VSIR;IGF1;CSF1;S100A13
LEE_AGING_CEREBELLUM_UP	12	50	3	0.0354765	0.0024471	C1QC;B2M;HEXB;CTSD;HMOX1;LGALS3BP;HEXB;F2;CTSH;HSPA8;B2M;SNTA1;THBS2;IMPA1
XIE_ST_HSC_S1PR3_OE_UP	17	84	2.4	0.0368493	0.00255539	ISG15;ISG15;MX1;IFIT3;GBP1;CXCL10;DDX58;DHX58;RTP4;CXCL11;ROR1;ROR1;STAT1;LGALS3BP;IL1RN;SARG;STAT1;ANKRD45;DTX3L;UBASH3B
ANDERSEN_LIVER_CANCER_KRT19_DN	11	44	3.1	0.0368661	0.00259735	AFM;AFM;PCYOX1;ITIH1;SERPINA3;SERPING1;UGT2B15;LEAP2;SAA4;ALAD;ALDH1A1;CPQ
BAELDE_DIABETIC_NEPHROPATHY_UP	11	44	3.1	0.0368661	0.00259735	FTL;C4A;UNC5B;C4A;UNC5B;ICAM2;IGFBP5;CTSH;HYAL1;CRIP1;FBP1;UNC5B;SEMA6A;AOC1;AOC1
REACTOME_HATS_ACETYLATE_HISTONES	9	32	3.7	0.0372474	0.00264715	H2AC1;H2BU1;H2BC21;H2BC12;H2BC21;H2AC11;H2AW;RUVBL1;WDR5;H3C1
INGRAM_SHH_TARGETS_UP	13	57	2.8	0.0372474	0.00267378	FTL;IGF1R;NID1;NOG;KLB;SMOC2;DCN;POMC;CFHR1;NOG;PENK;OAT;FLT4;MGP
RICKMAN_HEAD_AND_NECK_CANCER_E	10	38	3.4	0.0372474	0.00267917	KLK13;NTRK2;SERPINB13;IL1RN;ENDOU;CEACAM7;ALDH1A1;A2ML1;FAM3B;NTS
REACTOME_HCMV_INFECTION	10	38	3.4	0.0372474	0.00267917	RBBP4;H2AC1;H2BU1;H2BC21;H2BC12;H2BC21;H2AC11;H2AW;H3C1;CHMP2B;CHMP1A
FOSTER_KDM1A_TARGETS_UP	20	106	2.2	0.0372822	0.00269543	MX1;RELN;KLK13;HSH2D;PMEL;QPCT;DDR2;NTRK2;CD74;MMP2;LGALS3BP;SULT2B1;MANSC1;CDH3;FGL1;TIMM8A;FETUB;FAM3B;GSTM3;DEFA1
REACTOME_MEIOSIS	7	21	4.7	0.0376399	0.00273517	H2BU1;H2BC21;H2BC12;H2BC21;CDK2;H2AZ1;H3C1;SMC3
DACOSTA_ERCC3_ALLELE_XPCS_VS_TTD_UP	6	16	5.6	0.0380542	0.00281416	MDK;EFNB2;NNMT;CTSH;CXCL12;IGSF3
REACTOME_DNA_REPLICATION	14	64	2.6	0.0380542	0.00282143	H2BU1;H2BC21;H2BC12;H2BC21;PSMA2;PSMB4;CDK2;H2AZ1;UBC;H3C1;PCNA;PSMB1;PSME2;PSMD6;PSMA7
LIU_VAV3_PROSTATE_CARCINOGENESIS_UP	14	64	2.6	0.0380542	0.00282143	IFIT3;SERPINA3;EPHA4;PLA2G7;EPHA4;STAT1;NID1;CD74;TNFSF13B;PLAT;TIMP2;IGF1;STAT1;LILRA6;ARG1;IBSP
OHGUCHI_LIVER_HNF4A_TARGETS_DN	15	71	2.5	0.0388568	0.00290256	C9;C9;SERPINA3;PGLYRP2;HRG;APOA4;GCHFR;SAA4;ASGR1;F13B;CTSH;LIFR;CFHR1;ACP5;SERPINA12;OTC
IBRAHIM_NRF1_DOWN	12	51	2.9	0.0388568	0.00292394	VIM;ST6GALNAC6;AGRN;EPHA4;EPHA4;PLAT;NOG;ADGRL3;PDGFC;NOG;CCN1;SMOC1;DPP7;PMM1
ABBUD_LIF_SIGNALING_1_UP	8	27	3.9	0.0416147	0.00317752	MPO;NMI;LBP;KNG1;UPP1;IL1R1;VWF;KNG1;FBP1;KNG1
ZHONG_SECRETOME_OF_LUNG_CANCER_AND_FIBROBLAST	21	115	2.1	0.0420048	0.00322411	ITIH2;NUCB1;PSMB4;CTSD;HGFAC;AGRN;HGFAC;LGALS3BP;CDH17;APOH;TNXB;CAPG;PPIC;PSMB1;LAP3;TIMP2;HPRT1;PRL;CTSB;ME1;PRL;PSMA7;IMPA1
MEBARKI_HCC_PROGENITOR_WNT_UP	18	93	2.3	0.0420048	0.00323829	GBP1;LCP1;LCP1;LRRC15;MRC2;CTHRC1;MMP2;EPHB2;NOG;LUM;FAP;IL1R1;IGFBP5;DCN;PLAUR;NOG;CSF1R;CCN1;CSF1R;BMP1;THBS2
JOSEPH_RESPONSE_TO_SODIUM_BUTYRATE_DN	10	39	3.2	0.042552	0.00329617	NUCB1;CD300C;CSF1;NCL;A2M;THBS4;ALAD;CSF1;ALDH1A1;PYGL;ELANE
GOERING_BLOOD_HDL_CHOLESTEROL_QTL_TRANS	3	4	28	0.0427721	0.00339211	MPO;LDLRAD4;FLT4
SCIAN_INVERSED_TARGETS_OF_TP53_AND_TP73_UP	3	4	28	0.0427721	0.00339211	FTL;MMP17;PCNA
REACTOME_HDL_ASSEMBLY	3	4	28	0.0427721	0.00339211	APOA1;A2M;BMP1
WP_KININKALLIKREIN_PATHWAY	3	4	28	0.0427721	0.00339211	KLKB1;SERPING1;KNG1;KNG1;KNG1
KARLSSON_TGFB1_TARGETS_DN	19	101	2.2	0.044243	0.00352508	WARS1;MAT2B;FTH1;NID2;BSG;GLUL;TMEM132A;PCNA;PLAT;TIMP2;GOLM1;DCN;GABARAPL1;PSME2;GABARAP;GABARAP;CRIP1;GOLM1;ALAD;MGAT3;CTSB
ZHAN_MULTIPLE_MYELOMA_MF_UP	7	22	4.4	0.0452327	0.00368062	MGAT5;TMPRSS15;NTRK2;MFAP2;ITGB7;TYMP;CXCL12
ALONSO_METASTASIS_EMT_UP	7	22	4.4	0.0452327	0.00368062	SERPINA3;MMP2;ITGAV;LUM;L1CAM;PRKCA;CTSB
REACTOME_INITIAL_TRIGGERING_OF_COMPLEMENT	7	22	4.4	0.0452327	0.00368062	C1QC;C4A;CFP;C4A;FCN1;FCN3;FCN3;CRP;C1R
STAMBOLSKY_TARGETS_OF_MUTATED_TP53_DN	7	22	4.4	0.0452327	0.00368062	ISG15;ISG15;MX1;DDX58;LBP;STAT1;STAT1;UNG;DTX3L
BLANCO_MELO_BRONCHIAL_EPITHELIAL_CELLS_INFLUENZA_A_INFECTION_UP	13	59	2.7	0.0452327	0.00368736	GBP1;CXCL10;DHX58;CSF1;CXCL11;IGF2R;PLAT;ITGAV;HSPA6;LIFR;CSF1;POSTN;DTX3L;EDIL3
MAHADEVAN_IMATINIB_RESISTANCE_DN	5	12	6.7	0.0458134	0.00378539	KIT;BCHE;BCHE;ALDH1A2;CXCL12;MYOC
CHEOK_RESPONSE_TO_HD_MTX_UP	5	12	6.7	0.0458134	0.00378539	MPO;CTSG;OLFM4;S100A9;DEFA1
GAUSSMANN_MLL_AF4_FUSION_TARGETS_D_UP	6	17	5.1	0.047729	0.00399649	PLA2G7;QPCT;CD74;VSIR;EPHB6;CA13
REACTOME_FORMATION_OF_THE_BETA_CATENIN_TCF_TRANSACTIVATING_COMPLEX	6	17	5.1	0.047729	0.00399649	H2BU1;H2BC21;H2BC12;H2BC21;H2AZ1;RUVBL1;H3C1
REACTOME_POSITIVE_EPIGENETIC_REGULATION_OF_RRNA_EXPRESSION	6	17	5.1	0.047729	0.00399649	RBBP4;H2BU1;H2BC21;H2BC12;H2BC21;H2AZ1;H3C1
LINDSTEDT_DENDRITIC_CELL_MATURATION_C	10	40	3.1	0.0478111	0.004021	LGALS9;DEPP1;IGF1R;TNFRSF11B;NID1;CAPG;ALDH2;TRADD;MUC1;AOC1;AOC1
WP_ENDOCHONDRAL_OSSIFICATION_WITH_SKELETAL_DYSPLASIAS	12	53	2.7	0.0479699	0.00410323	GHR;IGF1R;STAT1;DDR2;KIF3A;PLAT;CTSV;IGF2;COL10A1;IGF1;STAT1;BMP7;MGP
WP_ENDOCHONDRAL_OSSIFICATION	12	53	2.7	0.0479699	0.00410323	GHR;IGF1R;STAT1;DDR2;KIF3A;PLAT;CTSV;IGF2;COL10A1;IGF1;STAT1;BMP7;MGP
DIAZ_CHRONIC_MYELOGENOUS_LEUKEMIA_DN	12	53	2.7	0.0479699	0.00410323	MPO;INSR;FCGR1A;ADA2;F13A1;ANXA5;CSF1R;LILRA6;S100A9;ELANE;CSF1R;ME1;MCL1
REACTOME_SIGNALING_BY_ROBO_RECEPTORS	18	95	2.2	0.0479699	0.00410967	PSMA2;PSMB4;UBC;PSMB1;NTN1;DCC;PSME2;ROBO2;ROBO1;PSMD6;RPS5;RPL12;RPS7;PRKCA;CXCL12;PSMA7;VASP;MAGOH
KIM_WT1_TARGETS_12HR_DN	20	110	2.1	0.0487115	0.00420454	NADK;TRA2B;FLRT2;SRSF7;TMPO;OGFR;AIMP1;KITLG;JPT1;NNMT;SOD2;CEACAM7;CCN1;OLR1;CALD1;MCL1;IGSF3;MAGOH;INHBA;ESM1
WP_SELENIUM_MICRONUTRIENT_NETWORK	13	60	2.6	0.049604	0.00429987	CAT;SAA1;MPO;SAA2;SERPINA3;SAA1;INSR;APOA1;PLAT;SAA4;F2;SOD2;CRP;SOD1
WP_HIPPOMERLIN_SIGNALING_DYSREGULATION	16	81	2.3	0.0498885	0.00434668	CXCL10;CDH20;IGF1R;INSR;NTRK2;CDH17;ITGB7;TEAD3;ITGAV;CDH3;KIT;CDH13;CSF1R;FGFR4;CSF1R;FLT1;FLT1;FLT4
KEGG_AXON_GUIDANCE	19	103	2.1	0.0498885	0.00441594	LRRC4C;EPHA4;SEMA4A;EPHA4;UNC5D;EFNB3;EPHA6;UNC5B;EPHB2;UNC5B;EFNB2;UNC5D;RASA1;NTN1;DCC;ROBO2;ROBO1;L1CAM;UNC5B;SEMA6A;EPHB6;SEMA4G;CXCL12
RUAN_RESPONSE_TO_TNF_UP	4	8	9.3	0.0498885	0.00449858	SERPINA3;HP;HP;STAT1;DCN;STAT1
REACTOME_HYALURONAN_METABOLISM	4	8	9.3	0.0498885	0.00449858	HEXB;HEXB;LYVE1;HYAL1;GUSB
REACTOME_HYALURONAN_UPTAKE_AND_DEGRADATION	4	8	9.3	0.0498885	0.00449858	HEXB;HEXB;LYVE1;HYAL1;GUSB
REACTOME_NETRIN_MEDIATED_REPULSION_SIGNALS	4	8	9.3	0.0498885	0.00449858	UNC5D;UNC5B;UNC5B;UNC5D;NTN1;DCC;UNC5B
GRANDVAUX_IRF3_TARGETS_UP	4	8	9.3	0.0498885	0.00449858	ISG15;ISG15;IFIT3;GBP1;F13B
WENG_POR_TARGETS_LIVER_DN	4	8	9.3	0.0498885	0.00449858	SERPINA3;APOA4;HSPH1;IGF1
WP_SARSCOV2_INNATE_IMMUNITY_EVASION_AND_CELLSPECIFIC_IMMUNE_RESPONSE	11	47	2.9	0.0498885	0.00450855	MX1;LAG3;CXCL10;DDX58;LAG3;DHX58;CXCL11;STAT1;BSG;HAVCR2;TRADD;STAT1;CXCL12
BURTON_ADIPOGENESIS_9	11	47	2.9	0.0498885	0.00450855	LGALS9;CSF1;SIRT2;PLAT;CCL7;CSF1;CCN1;DNM1;CXCL12;DPP7;THBS2;ANXA11
TONKS_TARGETS_OF_RUNX1_RUNX1T1_FUSION_MONOCYTE_UP	18	96	2.2	0.0508371	0.00461303	ISG15;ISG15;MX1;GBP1;LGALS9;CXCL10;CSF1;TREM1;KHSRP;DDR1;DDR1;ICAM2;CCL8;HPGDS;L1CAM;CSF1;ALDH1A2;PLS3;UNG;OLR1;INHBA
VILIMAS_NOTCH1_TARGETS_DN	7	23	4.1	0.0528606	0.00485514	MPO;CTSG;MATK;TREML1;CSF1R;CAMP;CAMP;ELANE;CSF1R
REACTOME_RUNX1_REGULATES_GENES_INVOLVED_IN_MEGAKARYOCYTE_DIFFERENTIATION_AND_PLATELET_FUNCTION	7	23	4.1	0.0528606	0.00485514	H2BU1;H2BC21;H2BC12;H2BC21;DPY30;H2AZ1;WDR5;H3C1
KRASNOSELSKAYA_ILF3_TARGETS_UP	7	23	4.1	0.0528606	0.00485514	ISG15;ISG15;MX1;IFIT3;IFI16;IFI16;STAT1;FAP;STAT1;H1-2
KEGG_LYSOSOME	13	61	2.5	0.053916	0.00499186	HEXB;CTSD;CTSG;IGF2R;HEXB;CTSV;CTSH;HYAL1;ACP5;PSAPL1;GUSB;CTSB;PSAP;SGSH
NAKAJIMA_MAST_CELL	8	29	3.6	0.0552982	0.00516062	CTSG;PLAT;CAPG;KIT;TPSAB1;HPGDS;TIMP1;PRG2
STEGER_ADIPOGENESIS_DN	6	18	4.7	0.0581197	0.00550969	PLA2G7;MMP2;PLAT;TIMP2;POSTN;THBS2
ZHENG_IL22_SIGNALING_DN	5	13	5.8	0.0581735	0.00566499	PRTG;GHR;RACGAP1;OLFM4;IL1RL1
PYEON_CANCER_HEAD_AND_NECK_VS_CERVICAL_DN	5	13	5.8	0.0581735	0.00566499	LRRC15;KLK8;CDSN;DCN;KLK7
REACTOME_MEIOTIC_SYNAPSIS	5	13	5.8	0.0581735	0.00566499	H2BU1;H2BC21;H2BC12;H2BC21;H2AZ1;SMC3
REACTOME_B_WICH_COMPLEX_POSITIVELY_REGULATES_RRNA_EXPRESSION	5	13	5.8	0.0581735	0.00566499	H2BU1;H2BC21;H2BC12;H2BC21;H2AZ1;H3C1
REACTOME_RNA_POLYMERASE_I_PROMOTER_ESCAPE	5	13	5.8	0.0581735	0.00566499	H2BU1;H2BC21;H2BC12;H2BC21;H2AZ1;H3C1
REACTOME_BASE_EXCISION_REPAIR_AP_SITE_FORMATION	5	13	5.8	0.0581735	0.00566499	H2BU1;H2BC21;H2BC12;H2BC21;H2AZ1;UNG
ZHANG_INTERFERON_RESPONSE	5	13	5.8	0.0581735	0.00566499	ISG15;ISG15;MX1;IFI16;RTP4;IFI16;STAT1;STAT1
WESTON_VEGFA_TARGETS	13	62	2.5	0.0590326	0.00577043	NID2;MMP2;GCHFR;CCL7;FAP;VWF;NNMT;CFHR1;ROR2;FBP1;UNG;POSTN;MGP
LEE_LIVER_CANCER_E2F1_DN	10	42	2.9	0.0595674	0.00584468	GHR;TDO2;NETO2;IGF1;CFHR1;ALDH1A1;ELANE;ME1;OAT;OTC
REACTOME_BINDING_AND_UPTAKE_OF_LIGANDS_BY_SCAVENGER_RECEPTORS	9	36	3.1	0.0631901	0.00624675	SAA1;SAA1;HP;HP;FTL;FTH1;COLEC12;APOA1;SCARA5;HSPH1;MSR1
REACTOME_AUF1_HNRNP_D0_BINDS_AND_DESTABILIZES_MRNA	9	36	3.1	0.0631901	0.00624675	HSPA1A;PSMA2;PSMB4;UBC;HSPA1A;PSMB1;HSPA1A;HSPA1A;HSPA1A;PSME2;PSMD6;HSPA8;HSPA1A;HSPA1B;PSMA7;HSPA1A
REACTOME_UCH_PROTEINASES	11	49	2.7	0.063335	0.0063078	H2AC1;H2AC11;PSMA2;H2AW;PSMB4;RUVBL1;UBC;PSMB1;PSME2;PSMD6;PSMA7
PID_AVB3_INTEGRIN_PATHWAY	11	49	2.7	0.063335	0.0063078	COL11A2;CSF1;IGF1R;ITGAV;ANGPTL3;COL10A1;COL15A1;MFGE8;CSF1;CSF1R;EDIL3;CSF1R;ILK
LEE_LIVER_CANCER_CIPROFIBRATE_UP	8	30	3.4	0.0642988	0.00645123	PLA2G7;QPCT;BSG;PLAT;MFGE8;S100A9;PMM1;CHKB
REACTOME_CHROMOSOME_MAINTENANCE	8	30	3.4	0.0642988	0.00645123	RBBP4;H2BU1;H2BC21;H2BC12;H2BC21;CDK2;H2AZ1;RUVBL1;PCNA
ALTEMEIER_RESPONSE_TO_LPS_WITH_MECHANICAL_VENTILATION	15	77	2.3	0.0643017	0.00647523	ISG15;ISG15;MX1;CXCL10;CD14;PLA2G7;STAT1;CCL17;UPP1;FCGR1A;IL1RN;LST1;F13A1;SOD2;PLAUR;STAT1;TIMP1
BOSCO_TH1_CYTOTOXIC_MODULE	12	56	2.6	0.064873	0.00655767	ISG15;ISG15;CXCL10;RTP4;CXCL11;GIMAP4;MERTK;IL15RA;CCL7;F13A1;CCL8;HAMP;PRKCA
REACTOME_ANTIGEN_PROCESSING_CROSS_PRESENTATION	14	70	2.3	0.064873	0.00660456	B2M;CD14;PSMA2;PSMB4;MRC2;UBC;FCGR1A;ITGAV;CTSV;PSMB1;PSME2;PSMD6;B2M;S100A9;PSMA7
TAKEDA_TARGETS_OF_NUP98_HOXA9_FUSION_8D_UP	14	70	2.3	0.064873	0.00660456	ISG15;ISG15;MX1;IFIT3;GBP1;DDX58;CTSG;STAT1;CALB1;LGALS3BP;IL22RA2;IL22RA2;NOG;TPSAB1;STAT1;NOG;REN;ALDH1A1
LINDVALL_IMMORTALIZED_BY_TERT_DN	10	43	2.8	0.0672449	0.00697006	CDON;ANTXR1;LRRC15;CELF2;LGALS3BP;FAP;NNMT;FMOD;CRIP1;CCN1
TAKEDA_TARGETS_OF_NUP98_HOXA9_FUSION_10D_DN	15	78	2.2	0.0692073	0.00731945	C1QC;C9;C9;PLA2G7;GLUL;CCL7;A2M;IL1R1;F13A1;ACP5;AOC1;MMP12;AOC1;CTSB;ME1;RNASE1;DEFA1
REACTOME_PEPTIDE_HORMONE_METABOLISM	11	50	2.6	0.0692073	0.00739671	CPB2;INHA;CTSD;CTSG;PLA2G7;BCHE;IGF1;POMC;BCHE;REN;INHBA;INHBB
HAHTOLA_MYCOSIS_FUNGOIDES_SKIN_DN	6	19	4.3	0.0692073	0.00740248	CAT;DSC2;LGALS3BP;DSTN;KLK7;SMC3
WP_IL1_AND_MEGAKARYOCYTES_IN_OBESITY	6	19	4.3	0.0692073	0.00740248	PLA2G7;IL1R1;TIMP2;F2;TIMP1;S100A9
VALK_AML_CLUSTER_5	6	19	4.3	0.0692073	0.00740248	LILRA1;SIGLEC7;LILRB2;TYMP;LILRA6;PSAP
OLSSON_E2F3_TARGETS_DN	6	19	4.3	0.0692073	0.00740248	H2AW;VIM;PCNA;IGF2;H1-2;INHBA
REACTOME_RECOGNITION_AND_ASSOCIATION_OF_DNA_GLYCOSYLASE_WITH_SITE_CONTAINING_AN_AFFECTED_PURINE	4	9	7.5	0.0692073	0.0074798	H2BU1;H2BC21;H2BC12;H2BC21;H2AZ1
REACTOME_REMOVAL_OF_AMINOTERMINAL_PROPEPTIDES_FROM_GAMMA_CARBOXYLATED_PROTEINS	4	9	7.5	0.0692073	0.0074798	F9;F9;FURIN;F2;PROC
REACTOME_GAMMA_CARBOXYLATION_TRANSPORT_AND_AMINO_TERMINAL_CLEAVAGE_OF_PROTEINS	4	9	7.5	0.0692073	0.0074798	F9;F9;FURIN;F2;PROC
REACTOME_UPTAKE_AND_FUNCTION_OF_ANTHRAX_TOXINS	4	9	7.5	0.0692073	0.0074798	MAP2K4;ANTXR1;ANTXR2;FURIN
MARKEY_RB1_CHRONIC_LOF_DN	14	71	2.3	0.0692492	0.00751382	C1QC;LGALS9;CD300C;IFI16;CD14;HMOX1;IFI16;PLA2G7;CFP;MSR1;DCN;GABARAPL1;CSF1R;MMP12;PRL;CSF1R;PRL
FURUKAWA_DUSP6_TARGETS_PCI35_UP	9	37	3	0.0692492	0.00756096	SAA1;LRRC4C;PLAAT2;SAA1;MDK;RTP4;HMOX1;TNFSF13B;RCN3;RNASE1
CHEBOTAEV_GR_TARGETS_DN	12	57	2.5	0.0693119	0.00759337	CLEC11A;FLRT2;CLEC11A;IGDCC4;TNFRSF11B;CNTN1;PLAT;VWA1;NRXN3;IGFBP5;LRP4;NRXN3;CXCL12;THBS2
MATZUK_PREOVULATORY_FOLLICLE	3	5	14	0.0706266	0.00786766	INHA;IMMP2L;SOD1
LY_AGING_OLD_UP	3	5	14	0.0706266	0.00786766	COMP;FMOD;MMP12
BIOCARTA_SLRP_PATHWAY	3	5	14	0.0706266	0.00786766	LUM;FMOD;DCN
WHITESIDE_CISPLATIN_RESISTANCE_DN	3	5	14	0.0706266	0.00786766	RPS5;TIMP1;SOD1
JINESH_BLEBBISHIELD_TRANSFORMED_STEM_CELL_SPHERES_UP	16	86	2.1	0.0708501	0.00791869	MX1;WARS1;HSPA1A;SRSF7;HMOX1;FTL;FTH1;SERPINB8;HSPA1A;HSPA1A;HSPA1A;HSPA1A;SOD2;APOL2;HSPA8;HSPA1A;OLR1;HSPA1B;ALDH1A1;S100A9;CTSB;CHMP1B;HSPA1A
KENNY_CTNNB1_TARGETS_UP	7	25	3.6	0.0709889	0.00802021	CD14;SRSF7;CELF2;MMP2;UPP1;IGFBP5;CCN1
TSAI_RESPONSE_TO_RADIATION_THERAPY	7	25	3.6	0.0709889	0.00802021	ISG15;ISG15;TNFRSF11B;LGALS3BP;PLAT;A2M;IGFBP5;CCN1
DOANE_BREAST_CANCER_CLASSES_DN	5	14	5.2	0.0709889	0.00811751	DSC2;CTSV;TIMP2;PLAUR;PYGL
DING_LUNG_CANCER_BY_MUTATION_RATE	5	14	5.2	0.0709889	0.00811751	NTRK2;DDR1;DDR1;PTPRD;ROBO2;FGFR4
PID_INTEGRIN5_PATHWAY	5	14	5.2	0.0709889	0.00811751	ITGB7;ITGAV;PLAUR;CCN1;EDIL3
JI_CARCINOGENESIS_BY_KRAS_AND_STK11_DN	5	14	5.2	0.0709889	0.00811751	MMP2;LUM;DCN;TIMP1;THBS2
BILANGES_SERUM_RESPONSE_TRANSLATION	5	14	5.2	0.0709889	0.00811751	KHSRP;FTHL17;RPS5;DNM1;RPS7
COATES_MACROPHAGE_M1_VS_M2_DN	10	44	2.8	0.0717385	0.00825615	C1QC;CD300C;HSPA1A;FLRT2;LBP;IGF2R;HS6ST1;HSPA1A;HSPA1A;IL18BP;HSPA1A;HSPA1A;MFGE8;HSPA1A;HSPA1B;ARG1;HSPA1A
DER_IFN_ALPHA_RESPONSE_UP	10	44	2.8	0.0717385	0.00825615	ISG15;ISG15;MX1;IFIT3;GBP1;B2M;RBBP4;IFI16;IFI16;NMI;STAT1;XRCC6;STAT1;B2M
CHIANG_LIVER_CANCER_SUBCLASS_CTNNB1_DN	17	94	2.1	0.0726099	0.00841	C9;C9;PGLYRP2;DCPS;CTHRC1;TNFSF13B;CAPG;LUM;TIMP2;FURIN;ACP5;FBP1;SEMA6A;TPST1;CRP;TIMP1;CXCL12;THBS2
TAKEDA_TARGETS_OF_NUP98_HOXA9_FUSION_10D_UP	17	94	2.1	0.0726099	0.00841	ISG15;ISG15;MX1;IFIT3;GBP1;CXCL10;DDX58;RTP4;STAT1;CALB1;CFP;LGALS3BP;ITGB7;IL22RA2;IL22RA2;KIT;TPSAB1;STAT1;REN;ALDH1A1
REACTOME_ECM_PROTEOGLYCANS	11	51	2.6	0.0742446	0.00862673	AGRN;TNXB;ITGAV;MUSK;LUM;COMP;FMOD;DCN;LRP4;MATN4;IBSP
REACTOME_REGULATION_OF_EXPRESSION_OF_SLITS_AND_ROBOS	13	65	2.3	0.0746436	0.00870062	PSMA2;PSMB4;UBC;PSMB1;PSME2;ROBO2;ROBO1;PSMD6;RPS5;RPL12;RPS7;PSMA7;MAGOH
HERNANDEZ_ABERRANT_MITOSIS_BY_DOCETACEL_2NM_UP	9	38	2.9	0.0768907	0.00907599	LCP1;IFI16;H2BC21;H2BC21;LCP1;HMOX1;IFI16;IGF1R;TIMP2;FOLH1;PLA2R1;THBS2
REACTOME_EPH_EPHRIN_MEDIATED_REPULSION_OF_CELLS	9	38	2.9	0.0768907	0.00907599	EPHA4;EPHA10;EPHA4;EFNB3;EPHA6;MMP2;EPHB2;EFNB2;EPHB6;DNM1
REACTOME_DECTIN_1_MEDIATED_NONCANONICAL_NF_KB_SIGNALING	9	38	2.9	0.0768907	0.00907599	PSMA2;PSMB4;CCL17;UBC;PSMB1;PSME2;PSMD6;CCL22;CCL22;PSMA7
BURTON_ADIPOGENESIS_8	9	38	2.9	0.0768907	0.00907599	PLA2G7;DSTN;ITGAV;CAPG;ANXA5;MATN4;CPQ;PSAP;SCPEP1
MEISSNER_NPC_HCP_WITH_H3K27ME3	6	20	4	0.0795925	0.00972309	PRKCZ;PYY;SFRP5;COL15A1;C1QTNF4;CBLN2;C1QTNF4
REACTOME_RNA_POLYMERASE_I_TRANSCRIPTION	6	20	4	0.0795925	0.00972309	RBBP4;H2BU1;H2BC21;H2BC12;H2BC21;H2AZ1;H3C1
WP_BLOOD_CLOTTING_CASCADE	6	20	4	0.0795925	0.00972309	F9;F9;KLKB1;PLAT;VWF;F2;F13B
WP_MATRIX_METALLOPROTEINASES	6	20	4	0.0795925	0.00972309	MMP17;BSG;MMP2;TIMP2;TIMP1;MMP12
TURASHVILI_BREAST_DUCTAL_CARCINOMA_VS_DUCTAL_NORMAL_UP	6	20	4	0.0795925	0.00972309	LRRC15;DCLK1;UNC5B;UNC5B;LUM;COL10A1;UNC5B;POSTN
KEGG_PORPHYRIN_AND_CHLOROPHYLL_METABOLISM	6	20	4	0.0795925	0.00972309	HMOX1;FTH1;UGT2B15;ALAD;GUSB;CPOX
REACTOME_CROSS_PRESENTATION_OF_SOLUBLE_EXOGENOUS_ANTIGENS_ENDOSOMES	8	32	3.1	0.0795925	0.00974722	PSMA2;PSMB4;MRC2;FCGR1A;PSMB1;PSME2;PSMD6;PSMA7
REACTOME_ASSEMBLY_OF_COLLAGEN_FIBRILS_AND_OTHER_MULTIMERIC_STRUCTURES	8	32	3.1	0.0795925	0.00974722	COL11A2;TLL1;PCOLCE;CTSV;COL10A1;COL15A1;CTSB;BMP1
REACTOME_DISEASES_OF_PROGRAMMED_CELL_DEATH	8	32	3.1	0.0795925	0.00974722	RBBP4;H2BU1;H2BC21;H2BC12;H2BC21;H2AZ1;H3C1;SOD2;TRADD
BLANCO_MELO_MERS_COV_INFECTION_MCR5_CELLS_UP	13	66	2.3	0.0801287	0.00990155	LAG3;HSPA1A;LAG3;NPPA;OIT3;HSPA1A;ITGB7;LEAP2;TNXB;LDLRAD4;HSPA1A;HSPA1A;HSPA1A;HSPA6;ENDOU;CSF1R;IL1RL1;ENGASE;HSPA1A;HSPA1B;CSF1R;HSPA1A
BAKKER_FOXO3_TARGETS_UP	7	26	3.4	0.081298	0.010076	VOPP1;CR2;DSTN;KIT;DCN;RBL2;ARG1
REACTOME_POST_TRANSLATIONAL_MODIFICATION_SYNTHESIS_OF_GPI_ANCHORED_PROTEINS	9	39	2.8	0.0864476	0.0108099	FOLR2;MDGA2;CNTN4;FCGR3B;RAET1L;PLAUR;CEACAM7;NTM;NTM;NTM;CPM
ANDERSEN_CHOLANGIOCARCINOMA_CLASS2	14	74	2.2	0.0865076	0.0108493	HSH2D;QPCT;CTHRC1;CDH17;CAPG;CDH3;CTSV;PLAUR;SARG;REG4;OLFM4;KLK7;OLR1;MMP12
CASORELLI_APL_SECONDARY_VS_DE_NOVO_UP	5	15	4.7	0.087651	0.0112191	HP;HP;NID1;ENTPD1;ANXA5;CPQ
BERENJENO_ROCK_SIGNALING_NOT_VIA_RHOA_UP	5	15	4.7	0.087651	0.0112191	ITGB7;CDSN;TNXB;CA6;ALDH2;CA6
NGUYEN_NOTCH1_TARGETS_UP	5	15	4.7	0.087651	0.0112191	CNTN1;ITGAV;ANXA6;ARL6IP5;S100A13
REACTOME_CREATION_OF_C4_AND_C2_ACTIVATORS	5	15	4.7	0.087651	0.0112191	C1QC;FCN1;FCN3;FCN3;CRP;C1R
VANHARANTA_UTERINE_FIBROID_UP	5	15	4.7	0.087651	0.0112191	MFAP2;EFNB2;IGF2;IGSF3;PRKCB
MEBARKI_HCC_PROGENITOR_WNT_UP_CTNNB1_DEPENDENT	10	46	2.6	0.0877556	0.0113672	GBP1;LCP1;LCP1;CTHRC1;EPHB2;NOG;LUM;IL1R1;IGFBP5;NOG;CSF1R;CCN1;CSF1R
DER_IFN_GAMMA_RESPONSE_UP	10	46	2.6	0.0877556	0.0113672	ISG15;ISG15;IFIT3;GBP1;B2M;RBBP4;IFI16;IFI16;NMI;STAT1;IL15RA;XRCC6;STAT1;B2M
RICKMAN_HEAD_AND_NECK_CANCER_C	12	60	2.3	0.0877556	0.0114832	FLRT2;SERPINA3;CXCL11;CNTN1;TDO2;DSC2;CALB1;CDSN;SOD2;IL1RL1;KLK7;OLR1
BACOLOD_RESISTANCE_TO_ALKYLATING_AGENTS_UP	4	10	6.2	0.0877556	0.011519	MDK;HSPA6;IGF1;CCN1
REACTOME_PEPTIDE_HORMONE_BIOSYNTHESIS	4	10	6.2	0.0877556	0.011519	INHA;POMC;INHBA;INHBB
REACTOME_REGULATION_OF_COMMISSURAL_AXON_PATHFINDING_BY_SLIT_AND_ROBO	4	10	6.2	0.0877556	0.011519	NTN1;DCC;ROBO2;ROBO1
WP_ACE_INHIBITOR_PATHWAY	4	10	6.2	0.0877556	0.011519	CTSG;KNG1;KNG1;KNG1;REN;NR3C2
WENG_POR_DOSAGE	4	10	6.2	0.0877556	0.011519	HMOX1;ANTXR2;ANXA5;FGL1
ZHU_CMV_24_HR_DN	11	53	2.5	0.0877556	0.0115562	FTL;IGF1R;DDR2;MATK;IGFBP5;IGF2;POSTN;CXCL12;C1R;THBS2;EPO
LEIN_CHOROID_PLEXUS_MARKERS	11	53	2.5	0.0877556	0.0115562	NID2;LBP;TCN2;LGALS3BP;PCOLCE;CDH3;LUM;F13A1;CSRP2;CPQ;MGP
CHIARADONNA_NEOPLASTIC_TRANSFORMATION_KRAS_UP	15	82	2.1	0.0879408	0.011613	ERH;IGF2R;ITGB7;PCNA;EFNB2;RASA1;LUM;CTSV;HPRT1;IL1RL1;TIMP1;PRL;CTSB;PRL;THBS2;PRKCB
GRAHAM_NORMAL_QUIESCENT_VS_NORMAL_DIVIDING_UP	8	33	3	0.0888603	0.0118	CXCL10;H2BC21;H2BC21;IL18R1;CXCL11;IL18R1;FTH1;SOD2;ALDH1A1;INHBA
LEE_LIVER_CANCER_MYC_UP	7	27	3.3	0.0909839	0.0124905	GLUL;PLAT;CSRP2;PDGFC;CCN1;RPL12;SNTB1
REACTOME_REPRODUCTION	7	27	3.3	0.0909839	0.0124905	H2BU1;H2BC21;H2BC12;H2BC21;CDK2;H2AZ1;H3C1;SMC3
REACTOME_TELOMERE_MAINTENANCE	7	27	3.3	0.0909839	0.0124905	H2BU1;H2BC21;H2BC12;H2BC21;CDK2;H2AZ1;RUVBL1;PCNA
HOUSTIS_ROS	7	27	3.3	0.0909839	0.0124905	CAT;HP;HP;HMOX1;FTL;FTH1;SOD2;SOD1
KEGG_REGULATION_OF_AUTOPHAGY	7	27	3.3	0.0909839	0.0124905	IFNA4;IFNA7;IFNA1;GABARAPL1;GABARAP;GABARAP;ATG7;ATG4A
ASTON_MAJOR_DEPRESSIVE_DISORDER_UP	6	21	3.7	0.0909839	0.0125183	CELF2;COMP;ADAM22;PENK;CALD1;GSTM3
REACTOME_DNA_DAMAGE_TELOMERE_STRESS_INDUCED_SENESCENCE	6	21	3.7	0.0909839	0.0125183	H2BU1;H2BC21;H2BC12;H2BC21;CDK2;H2AZ1;H1-2
REACTOME_CASPASE_ACTIVATION_VIA_EXTRINSIC_APOPTOTIC_SIGNALLING_PATHWAY	6	21	3.7	0.0909839	0.0125183	CD14;TNFRSF10B;UNC5B;UNC5B;DCC;TRADD;TNFRSF10B;UNC5B;TNFRSF10A
REACTOME_DISEASES_OF_CARBOHYDRATE_METABOLISM	6	21	3.7	0.0909839	0.0125183	UBC;RPIA;LCT;HYAL1;GUSB;SGSH
REACTOME_TRANSCRIPTIONAL_REGULATION_OF_GRANULOPOIESIS	6	21	3.7	0.0909839	0.0125183	H2BU1;H2BC21;H2BC12;H2BC21;CDK2;H2AZ1;H3C1
REACTOME_COLLAGEN_DEGRADATION	9	40	2.7	0.0923975	0.0127809	COL11A2;CTSD;MMP2;FURIN;COL10A1;COL15A1;MMP12;ELANE;CTSB
FRASOR_RESPONSE_TO_ESTRADIOL_DN	9	40	2.7	0.0923975	0.0127809	SNCG;STC1;IL1R1;RBL2;CTSH;FOLH1;MUC1;TTC9;INHBB
LAIHO_COLORECTAL_CANCER_SERRATED_UP	12	61	2.3	0.0940073	0.013073	GBP1;B2M;NPTN;PPIC;ANXA5;CSRP2;HSPA8;PDGFC;B2M;POSTN;CTSB;CHMP2B;ARPC2
REACTOME_REGULATION_OF_MRNA_STABILITY_BY_PROTEINS_THAT_BIND_AU_RICH_ELEMENTS	11	54	2.4	0.0952362	0.013279	HSPA1A;PSMA2;PSMB4;KHSRP;UBC;HSPA1A;PSMB1;HSPA1A;HSPA1A;HSPA1A;PSME2;PSMD6;HSPA8;HSPA1A;HSPA1B;PRKCA;PSMA7;HSPA1A
