# Supplementary material for: Pregnancy-specific responses to COVID-19 are revealed by high-throughput proteomics of human plasma
Source: Research Square preprint supplement (doi:10.21203/rs.3.rs-1906806/v1), 2022-08-22
Supplement: Supplementary file 5 [file a84a7ca7461000b7f75ec63e.xlsx]

## Sheet: TableS5_
Supplementary Table 4. Biological processes enriched among differentially regulated proteins in non-pregnant COVID-19 patients.
Biological process	Count	Size	OddsRatio	q	Pvalue	Genes
establishment of protein localization	356	697	1.8	0	2.12062e-12	NADK,PRKCZ,AP1AR,TGFB1,ADCYAP1,CHMP1A,JAK2,HDAC6,SAA1,COMP,SVBP,PRKACA,RAB7A,SFRP1,CSK,TGFB3,RAB11A,LCP1,SNX5,ZFAND1,RAB1A,RAB21,NUCB1,PDIA4,CHMP2B,PRKCB,COPB2,ZDHHC4,MMP12,HGS,RILPL1,ARL6IP5,AP1S2,NPLOC4,PLEKHF2,DAB2,RABIF,RAB5C,SCARB2,ARF5,YWHAH,CAVIN1,TNKS,RAB11FIP3,FLNA,SYTL4,GOLPH3L,ARFIP2,INHBB,CHMP1B,MAPK8,SMURF1,GLUL,SNCG,RAB6B,ARF4,VPS53,AP1G2,GSK3A,SNX4,PLEK,RAB5B,DERL1,GRIPAP1,RAB3D,SY…
protein transport	337	656	1.8	0	3.57958e-12	NADK,PRKCZ,AP1AR,TGFB1,ADCYAP1,CHMP1A,JAK2,HDAC6,SAA1,COMP,SVBP,PRKACA,RAB7A,SFRP1,CSK,TGFB3,RAB11A,LCP1,SNX5,ZFAND1,RAB1A,RAB21,NUCB1,PDIA4,CHMP2B,PRKCB,COPB2,ZDHHC4,MMP12,HGS,RILPL1,ARL6IP5,AP1S2,NPLOC4,PLEKHF2,DAB2,RABIF,RAB5C,SCARB2,ARF5,YWHAH,CAVIN1,TNKS,RAB11FIP3,FLNA,SYTL4,GOLPH3L,ARFIP2,INHBB,CHMP1B,MAPK8,SMURF1,GLUL,SNCG,RAB6B,ARF4,VPS53,AP1G2,GSK3A,SNX4,PLEK,RAB5B,DERL1,GRIPAP1,RAB3D,SY…
cellular protein localization	353	703	1.7	0	4.81998e-11	ISG15,PRKCZ,AP1AR,BSG,CD4,TGFB1,PTN,JAK2,HDAC6,ROCK2,PRKACA,RAB7A,CSK,LRRC15,RAB11A,LCP1,SNX5,ZFAND1,RAB1A,RAB21,NUCB1,ADAM22,COPB2,ZDHHC4,MMP12,MAPRE3,HGS,RILPL1,ARL6IP5,AP1S2,NPLOC4,DAB2,RAB5C,TOLLIP,SCARB2,ARF5,YWHAH,TNKS,RAB11FIP3,FLNA,SLC9A3R1,SYTL4,MYL12A,AGRN,GOLPH3L,ARFIP2,MAPK8,SMURF1,GLUL,MAPRE1,RAB6B,VIL1,ARF4,AP1G2,NUBP1,GSK3A,PPP2R5A,RAB5B,DERL1,GRIPAP1,RAB3D,SYK,CD36,USP4,RAB3C,CTNN…
protein localization	472	981	1.6	0	6.60405e-11	NADK,ISG15,PRKCZ,AP1AR,BSG,CD4,TGFB1,ADCYAP1,ARHGDIA,PTN,CHMP1A,JAK2,HDAC6,SAA1,COMP,ROCK2,SVBP,PRKACA,RAB7A,SFRP1,CSK,LRRC15,TGFB3,RAB11A,LCP1,SNX5,ZFAND1,RAB1A,RAB21,NUCB1,PDIA4,CHMP2B,ADAM22,PRKCB,COPB2,ZDHHC4,MMP12,MAPRE3,HGS,RILPL1,CLSTN3,ARL6IP5,AP1S2,NPLOC4,PLEKHF2,DAB2,RABIF,RAB5C,TOLLIP,SCARB2,ARF5,YWHAH,CAVIN1,TNKS,RAB11FIP3,FLNA,SLC9A3R1,SYTL4,MYL12A,AGRN,GOLPH3L,NECTIN1,ARFIP2,INHBB,C…
cellular macromolecule localization	353	707	1.7	0	1.21384e-10	ISG15,PRKCZ,AP1AR,BSG,CD4,TGFB1,PTN,JAK2,HDAC6,ROCK2,PRKACA,RAB7A,CSK,LRRC15,RAB11A,LCP1,SNX5,ZFAND1,RAB1A,RAB21,NUCB1,ADAM22,COPB2,ZDHHC4,MMP12,MAPRE3,HGS,RILPL1,ARL6IP5,AP1S2,NPLOC4,DAB2,RAB5C,TOLLIP,SCARB2,ARF5,YWHAH,TNKS,RAB11FIP3,FLNA,SLC9A3R1,SYTL4,MYL12A,AGRN,GOLPH3L,ARFIP2,MAPK8,SMURF1,GLUL,MAPRE1,RAB6B,VIL1,ARF4,AP1G2,NUBP1,GSK3A,PPP2R5A,RAB5B,DERL1,GRIPAP1,RAB3D,SYK,CD36,USP4,RAB3C,CTNN…
macromolecule localization	538	1145	1.5	0	2.67426e-10	NADK,ISG15,PRKCZ,AP1AR,BSG,CD4,TGFB1,RUVBL1,ADCYAP1,PLA2G5,ARHGDIA,PTN,CHMP1A,JAK2,PLA2G10,PLA2G2C,PON1,HDAC6,SAA1,COMP,EDN1,ROCK2,SVBP,PRKACA,RAB7A,ITGAV,SFRP1,CSK,LRRC15,TGFB3,RAB11A,LCP1,SNX5,ZFAND1,RAB1A,RAB21,NUCB1,PDIA4,CHMP2B,ADAM22,PRKCB,COPB2,ZDHHC4,MMP12,MAPRE3,HGS,RILPL1,CLSTN3,ARL6IP5,AP1S2,NPLOC4,PLEKHF2,DAB2,RABIF,RAB5C,TOLLIP,SCARB2,ARF5,YWHAH,CAVIN1,TNKS,GRAMD1C,RAB11FIP3,SRSF7,FL…
peptide biosynthetic process	139	239	2.3	0	5.6821e-10	VIM,MRPS14,C12orf65,WARS1,ROCK2,WARS2,PTK2B,EIF4E,HARS1,DARS1,NARS1,MAPK3,ILF3,DDX6,EIF4A1,NCK2,RPS6KB1,ERBB2,YARS1,EIF2B1,MARS1,CIRBP,RBM3,AKT1,AARS1,FURIN,ZC3H12A,EIF3M,KHSRP,DARS2,AKT2,EIF2S1,HSPB1,METAP1,GSPT2,EIF4H,IMPACT,SHMT2,RWDD1,EIF4A2,PA2G4,RBM4,EIF4G2,EIF1AY,ASCC2,TARS1,RPS6KA3,EIF2A,SAMD4B,EIF2S2,MRPL12,DRG1,TIA1,EEF1E1,MKNK1,MTIF3,AIMP1,CNOT9,MAPK1,STAT3,FXR1,VARS1,DPH2,EIF5A,EIF4B,…
intracellular protein transport	196	361	2	0	6.33346e-10	TGFB1,JAK2,HDAC6,PRKACA,RAB7A,RAB11A,LCP1,SNX5,ZFAND1,RAB1A,RAB21,NUCB1,COPB2,ZDHHC4,MMP12,HGS,RILPL1,AP1S2,NPLOC4,RAB5C,SCARB2,ARF5,YWHAH,FLNA,SYTL4,ARFIP2,MAPK8,SMURF1,RAB6B,ARF4,AP1G2,GSK3A,RAB5B,DERL1,GRIPAP1,SYK,CD36,AHCYL1,SNF8,ARL11,RAC2,RAB5A,SSR2,HIKESHI,ERBB2,AGT,SNX8,ARL6IP1,PTPN11,YWHAZ,IFT22,RAB22A,PTGS2,AKT1,ARFIP1,ZC3H12A,FAF2,GGA1,REEP2,GET3,YWHAG,AKT2,GSK3B,BMP4,HSPB1,TIMM10B,FYN…
translation	133	229	2.3	0	1.54119e-09	VIM,MRPS14,C12orf65,WARS1,ROCK2,WARS2,PTK2B,EIF4E,HARS1,DARS1,NARS1,MAPK3,ILF3,DDX6,EIF4A1,NCK2,RPS6KB1,ERBB2,YARS1,EIF2B1,MARS1,CIRBP,RBM3,AKT1,AARS1,ZC3H12A,EIF3M,KHSRP,DARS2,AKT2,EIF2S1,HSPB1,METAP1,GSPT2,EIF4H,IMPACT,SHMT2,RWDD1,EIF4A2,PA2G4,RBM4,EIF4G2,EIF1AY,ASCC2,TARS1,RPS6KA3,EIF2A,SAMD4B,EIF2S2,MRPL12,DRG1,TIA1,EEF1E1,MKNK1,MTIF3,AIMP1,CNOT9,MAPK1,STAT3,FXR1,VARS1,DPH2,EIF5A,EIF4B,ACO1,R…
nitrogen compound transport	379	779	1.6	0	1.54893e-09	NADK,PRKCZ,AP1AR,TGFB1,NPPA,ADCYAP1,CHMP1A,JAK2,HDAC6,SAA1,COMP,EDN1,SVBP,PRKACA,RAB7A,SFRP1,CSK,NTRK2,TGFB3,RAB11A,LCP1,SNX5,ZFAND1,RAB1A,PAX8,RAB21,NUCB1,LYN,PDIA4,CHMP2B,BTK,PRKCB,COPB2,ZDHHC4,MMP12,HRG,HGS,RILPL1,ARL6IP5,AP1S2,NPLOC4,PLEKHF2,DAB2,RABIF,RAB5C,SCARB2,ARF5,YWHAH,CAVIN1,TNKS,RAB11FIP3,SRSF7,FLNA,SLC9A3R1,SYTL4,GOLPH3L,DDX19A,ARFIP2,INHBB,CHMP1B,MAPK8,SMURF1,DDX19B,GLUL,SNCG,RAB6B…
organic substance transport	436	916	1.5	0	2.9165e-09	NADK,PRKCZ,AP1AR,TGFB1,NPPA,ADCYAP1,PLA2G5,CHMP1A,JAK2,PLA2G10,PLA2G2C,PON1,HDAC6,SAA1,COMP,EDN1,SVBP,PRKACA,RAB7A,ITGAV,SFRP1,CSK,NTRK2,TGFB3,RAB11A,LCP1,SNX5,ZFAND1,RAB1A,PAX8,RAB21,NUCB1,LYN,PDIA4,CHMP2B,BTK,PRKCB,COPB2,ZDHHC4,MMP12,HRG,HGS,RILPL1,ARL6IP5,AP1S2,NPLOC4,PLEKHF2,DAB2,RABIF,RAB5C,SCARB2,ARF5,YWHAH,CAVIN1,TNKS,GRAMD1C,RAB11FIP3,SRSF7,FLNA,SLC9A3R1,SYTL4,FABP6,GOLPH3L,DDX19A,ARFIP2,…
intracellular transport	280	555	1.7	0	3.77901e-09	PRKCZ,AP1AR,TGFB1,SOD1,CHMP1A,JAK2,HDAC6,PRKACA,RAB7A,RAB11A,FHOD1,LCP1,SNX5,ZFAND1,RAB1A,RAB21,NUCB1,CHMP2B,INPP5F,COPB2,ZDHHC4,MMP12,HGS,RILPL1,AP1S2,NPLOC4,DAB2,RAB5C,SCARB2,ARF5,YWHAH,RAB11FIP3,FLNA,PPP1CC,SLC9A3R1,SYTL4,DDX19A,ARFIP2,CHMP1B,MAPK8,SMURF1,DDX19B,RAB6B,ARF4,VPS53,AP1G2,MAPK3,GSK3A,SNX4,RAB5B,DERL1,GRIPAP1,SYK,CD36,AHCYL1,SNF8,LDLRAP1,SNX12,ARL11,RAC2,RAB5A,VAPA,SSR2,HIKESHI,SRC…
organonitrogen compound metabolic process	1174	2743	1.4	0	4.24557e-09	NADK,ISG15,MMP17,PRKCZ,CLEC7A,TCL1B,PSMA2,CD4,TNFSF10,TGFB1,NPPA,ADAMDEC1,VIM,SOD1,TMPRSS15,RUVBL1,MRPS14,CCNA1,ADCYAP1,PLA2G5,C12orf65,CSF1,SPTLC2,AHSG,UPP1,None,CTSG,BMP10,KNG1,MICAL1,CHMP1A,GALNT3,FCGR1A,MMP16,PRDX4,CTSF,JAK2,PLA2G10,PON1,WARS1,KEL,MAP2K4,ABHD12,EVPL,HDAC6,CHST4,COMP,FGFR3,B4GALT3,PLG,WFIKKN1,FGF22,SPINT1,EDN1,ROCK2,SNTA1,SVBP,ENO2,PRKACA,THBS4,DAPP1,PGLYRP2,ILK,RAB7A,KLHL3,IT…
cellular localization	496	1061	1.5	0	4.52968e-09	NADK,ISG15,PRKCZ,AP1AR,BSG,CD4,TGFB1,NPPA,SOD1,PTN,CHMP1A,JAK2,HDAC6,ROCK2,SNTA1,PRKACA,RAB7A,CSK,LRRC15,FER,RAB11A,FHOD1,LCP1,SNX5,ZFAND1,DNM1,KIT,ZWINT,PTK2B,UBASH3B,RAB1A,RAB21,NUCB1,LYN,CHMP2B,BTK,ADAM22,XCL1,PRKCB,INPP5F,COPB2,ZDHHC4,MMP12,MAPRE3,HGS,RILPL1,ARL6IP5,AP1S2,NPLOC4,DAB2,RAB5C,TOLLIP,SCARB2,ARF5,YWHAH,TNKS,CXCL10,OPHN1,FTL,RAB11FIP3,FLNA,PPP1CC,SLC9A3R1,SYTL4,MYL12A,AGRN,GOLPH3L,…
cellular component organization or biogenesis	995	2289	1.4	0	4.5793e-09	H2BU1,H2BC21,H2AW,CELF2,H2BC12,ISG15,MMP17,CRTAC1,PRKCZ,CLEC7A,AP1AR,BSG,TNFSF10,TGFB1,GFRA3,NPPA,LST1,EFNB3,VIM,SOD1,SMOC1,ATF1,RUVBL1,CCNA1,ADCYAP1,MDK,PLA2G5,C12orf65,ARHGDIA,MPO,SULT4A1,CTSG,PTN,BMP10,MICAL1,PRC1,CHMP1A,FCGR1A,COL11A2,MMP16,PRDX4,JAK2,PLA2G10,WARS1,KEL,M1AP,EVPL,HDAC6,CCL27,COMP,BIN2,FERMT3,PLG,SPINT1,EDN1,ROCK2,SNTA1,SVBP,PRKACA,ILK,RAB7A,ITGAV,SFRP1,PPIF,CSK,DBNL,PLXNA4,LUM…
cellular component organization	977	2246	1.4	0	6.17853e-09	H2BU1,H2BC21,H2AW,CELF2,H2BC12,ISG15,MMP17,CRTAC1,PRKCZ,CLEC7A,AP1AR,BSG,TNFSF10,TGFB1,GFRA3,NPPA,LST1,EFNB3,VIM,SOD1,SMOC1,ATF1,RUVBL1,CCNA1,ADCYAP1,MDK,PLA2G5,C12orf65,ARHGDIA,MPO,SULT4A1,CTSG,PTN,BMP10,MICAL1,PRC1,CHMP1A,FCGR1A,COL11A2,MMP16,PRDX4,JAK2,PLA2G10,WARS1,KEL,M1AP,EVPL,HDAC6,CCL27,COMP,BIN2,FERMT3,PLG,SPINT1,EDN1,ROCK2,SNTA1,SVBP,PRKACA,ILK,RAB7A,ITGAV,SFRP1,PPIF,CSK,DBNL,PLXNA4,LUM…
peptide metabolic process	177	335	1.8	0	6.48423e-08	VIM,SOD1,MRPS14,C12orf65,CTSG,WARS1,ROCK2,PGLYRP2,NTRK2,WARS2,HPGDS,PTK2B,ARL6IP5,EIF4E,HARS1,DARS1,XPNPEP1,CLIC3,NARS1,MAPK3,ILF3,GSK3A,CMA1,DDX6,EIF4A1,NCK2,RPS6KB1,ERBB2,CASP3,YARS1,EIF2B1,MARS1,CIRBP,CLIC1,RBM3,AKT1,AARS1,FURIN,ZC3H12A,EIF3M,GPX1,KHSRP,DARS2,AKT2,EIF2S1,HSPB1,METAP1,GSPT2,EIF4H,IMPACT,SHMT2,RWDD1,EIF4A2,PA2G4,RBM4,EIF4G2,EIF1AY,ASCC2,TARS1,PIN1,RPS6KA3,CPD,EIF2A,SAMD4B,EIF2S2…
amide biosynthetic process	159	296	1.9	0	7.59951e-08	VIM,MRPS14,C12orf65,SPTLC2,WARS1,B4GALT3,ROCK2,WARS2,PTK2B,EIF4E,HARS1,DARS1,NARS1,MAPK3,ILF3,DDX6,EIF4A1,NCK2,RPS6KB1,SPHK1,ERBB2,YARS1,EIF2B1,MARS1,CIRBP,RBM3,AKT1,AARS1,FURIN,ZC3H12A,EIF3M,KHSRP,DARS2,AKT2,EIF2S1,HSPB1,METAP1,GSPT2,EIF4H,IMPACT,PPCS,SHMT2,CEBPA,RWDD1,EIF4A2,B4GALT6,PA2G4,RBM4,EIF4G2,EIF1AY,ASCC2,TARS1,RPS6KA3,EIF2A,SAMD4B,EIF2S2,MRPL12,DRG1,TIA1,EEF1E1,MKNK1,MTIF3,AIMP1,CNOT9,…
positive regulation of cellular component organization	266	537	1.6	0	8.7374e-08	ISG15,CLEC7A,AP1AR,TNFSF10,TGFB1,ATF1,ADCYAP1,MDK,PLA2G5,PTN,BMP10,WARS1,CCL27,EDN1,ROCK2,ILK,SFRP1,PPIF,DBNL,PLXNA4,NTRK2,VASP,TGFB3,FER,RAB11A,FHOD1,LCP1,ANAPC7,DNM1,KIT,PTK2B,DSTN,ARPC1B,RHOC,RAB21,LYN,HRG,NME2,CLSTN3,NEK7,DAB2,CBLN2,SCARB2,TNKS,FLNA,CNTN1,L1CAM,AGRN,ARFIP2,MAPK8,MAPRE1,VIL1,ARPC3,IL4,GRB2,BMP2,INSR,ATL3,MAPK3,GSK3A,NCKIPSD,ROBO2,PLEK,SYK,CD36,CTNNB1,LDLRAP1,RAC2,HGF,STUB1,HSP…
multivesicular body assembly	17	17	Inf	0	1.00854e-07	CHMP1A,RAB11A,CHMP2B,HGS,CHMP1B,SNF8,TSG101,IST1,VTA1,VPS4A,CHMP2A,VPS28,VPS4B,VPS25,CHMP6,PDCD6IP,CHMP4A
transport	713	1611	1.4	0	1.19516e-07	NADK,PRKCZ,CLEC7A,AP1AR,CD4,TGFB1,NPPA,SOD1,TMPRSS15,ADCYAP1,PLA2G5,AHSG,MRC2,MICAL1,CHMP1A,FCGR1A,ASIC4,JAK2,PLA2G10,PLA2G2C,PON1,KEL,HDAC6,NETO1,SAA1,COMP,BIN2,EDN1,SNTA1,SVBP,PRKACA,RAB7A,KLHL3,ITGAV,SFRP1,PPIF,ICAM3,CSK,DBNL,ANXA11,NTRK2,TGFB3,FER,RAB11A,FHOD1,LCP1,SNX5,ZFAND1,DNM1,KIT,PTK2B,UBASH3B,IP6K2,RAB1A,PAX8,RAB21,NUCB1,LYN,PDIA4,CHMP2B,BTK,XCL1,PRKCB,INPP5F,COPB2,IL15RA,ZDHHC4,MMP12,…
regulation of protein metabolic process	566	1252	1.4	0	1.41897e-07	ISG15,PRKCZ,CLEC7A,TCL1B,CD4,TNFSF10,TGFB1,NPPA,VIM,SOD1,CCNA1,ADCYAP1,C12orf65,CSF1,AHSG,BMP10,KNG1,MICAL1,FCGR1A,JAK2,PLA2G10,WARS1,MAP2K4,HDAC6,FGFR3,WFIKKN1,FGF22,SPINT1,EDN1,ROCK2,SNTA1,SVBP,PRKACA,THBS4,ILK,RAB7A,ITGAV,SFRP1,CSK,GPNMB,NTRK2,CRIM1,TGFB3,FER,KIT,CTDSP1,INPP5B,PTK2B,UBASH3B,TNXB,PRKAR2B,RAB1A,CEP43,LYN,SERPINB3,INPP5F,FGF3,MAPRE3,ANTXR1,HRG,HGS,CDK2,ARL6IP5,IFNL1,DAB2,KAT5,TOL…
regulation of cellular localization	204	399	1.7	0	1.73992e-07	NADK,PRKCZ,TGFB1,NPPA,PTN,JAK2,ROCK2,PRKACA,CSK,LRRC15,FER,RAB11A,LCP1,ZFAND1,PTK2B,UBASH3B,RAB21,NUCB1,LYN,XCL1,INPP5F,DAB2,CXCL10,FLNA,PPP1CC,MAPK8,GLUL,VIL1,IL4,MAPK3,GSK3A,PPP2R5A,SNX4,BCL2,GRIPAP1,SYK,CD36,CTNNB1,LDLRAP1,SNX12,RAC2,PDPK1,SRC,CCNE1,ERBB2,TRIM40,TSG101,RER1,PTPN11,MRAP,PTGS2,AKT1,ARFIP1,ZC3H12A,PTPN6,REEP2,PID1,AKT2,GSK3B,BMP4,PRKAA2,PPP1R9B,SCP2,FYN,STAC,FKBP1B,DENND10,NUMB,S…
establishment of localization	728	1653	1.3	0	2.2282e-07	NADK,PRKCZ,CLEC7A,AP1AR,CD4,TGFB1,NPPA,SOD1,TMPRSS15,ADCYAP1,PLA2G5,AHSG,MRC2,MICAL1,CHMP1A,FCGR1A,ASIC4,JAK2,PLA2G10,PLA2G2C,PON1,KEL,HDAC6,NETO1,SAA1,COMP,BIN2,EDN1,SNTA1,SVBP,PRKACA,RAB7A,KLHL3,ITGAV,SFRP1,PPIF,ICAM3,CSK,DBNL,ANXA11,NTRK2,TGFB3,FER,RAB11A,FHOD1,LCP1,SNX5,ZFAND1,DNM1,KIT,ZWINT,PTK2B,UBASH3B,IP6K2,RAB1A,PAX8,RAB21,NUCB1,LYN,PDIA4,CHMP2B,BTK,XCL1,PRKCB,INPP5F,COPB2,IL15RA,ZDHHC4,…
regulation of cellular protein metabolic process	530	1168	1.4	0	2.29719e-07	ISG15,PRKCZ,CLEC7A,TCL1B,CD4,TNFSF10,TGFB1,NPPA,VIM,SOD1,CCNA1,ADCYAP1,C12orf65,CSF1,AHSG,BMP10,KNG1,MICAL1,FCGR1A,JAK2,PLA2G10,WARS1,MAP2K4,HDAC6,FGFR3,WFIKKN1,FGF22,SPINT1,EDN1,ROCK2,SNTA1,SVBP,PRKACA,THBS4,ILK,SFRP1,CSK,GPNMB,NTRK2,CRIM1,TGFB3,FER,KIT,CTDSP1,PTK2B,UBASH3B,TNXB,PRKAR2B,CEP43,LYN,SERPINB3,INPP5F,FGF3,MAPRE3,ANTXR1,HRG,HGS,CDK2,ARL6IP5,IFNL1,DAB2,KAT5,TOLLIP,IL22RA2,CLEC3B,TBK1,S…
cellular amide metabolic process	228	456	1.6	0	3.1991e-07	VIM,SOD1,MRPS14,C12orf65,SPTLC2,CTSG,WARS1,B4GALT3,ROCK2,PGLYRP2,NTRK2,WARS2,HPGDS,PTK2B,NT5C,ARL6IP5,EIF4E,HARS1,DARS1,MTHFS,XPNPEP1,CLIC3,NARS1,AASDHPPT,MAPK3,ILF3,GSK3A,CMA1,DDX6,EIF4A1,NCK2,RPS6KB1,SPHK1,ERBB2,CASP3,YARS1,EIF2B1,MARS1,CIRBP,CLIC1,RBM3,AKT1,AARS1,FURIN,ZC3H12A,EIF3M,GPX1,KHSRP,DARS2,AKT2,EIF2S1,HSPB1,METAP1,ACSF2,GSPT2,EIF4H,IMPACT,PPCS,SHMT2,CEBPA,RWDD1,EIF4A2,HSD17B4,B4GALT6…
posttranscriptional regulation of gene expression	111	197	2.1	0	3.26561e-07	TGFB1,VIM,C12orf65,None,ROCK2,PRKCA,PTK2B,EIF4E,MAPK3,ILF3,DDX6,NCK2,RPS6KB1,ERBB2,CIRBP,RBM3,GDNF,AKT1,AARS1,ZC3H12A,KHSRP,AKT2,EIF2S1,BMP4,HSPB1,METAP1,MAPKAPK2,EIF4H,IMPACT,SMAD2,SHMT2,SMAD3,EIF4A2,PA2G4,RBM4,EIF4G2,ASCC2,PPP3CA,RPS6KA3,EIF2A,SAMD4B,TIA1,MKNK1,CNOT9,MAPK1,LIMD1,STAT3,FXR1,DPH2,EIF5A,EIF4B,ACO1,RHOA,TIRAP,DPH5,EIF3B,RIPK1,ACE,HNRNPA0,DHFR,NCL,SMAD1,TACO1,DAPK1,YBX1,CD28,PKM,HNR…
establishment of localization in cell	365	775	1.5	0	3.3292e-07	NADK,PRKCZ,AP1AR,TGFB1,NPPA,SOD1,CHMP1A,JAK2,HDAC6,SNTA1,PRKACA,RAB7A,FER,RAB11A,FHOD1,LCP1,SNX5,ZFAND1,DNM1,KIT,ZWINT,PTK2B,UBASH3B,RAB1A,RAB21,NUCB1,LYN,CHMP2B,BTK,XCL1,PRKCB,INPP5F,COPB2,ZDHHC4,MMP12,HGS,RILPL1,AP1S2,NPLOC4,DAB2,RAB5C,SCARB2,ARF5,YWHAH,CXCL10,OPHN1,RAB11FIP3,FLNA,PPP1CC,SLC9A3R1,SYTL4,DDX19A,ARFIP2,CHMP1B,MAPK8,SMURF1,DDX19B,SNCG,RAB6B,ARF4,IL4,VPS53,AP1G2,MAPK3,GSK3A,SNX4,BCL…
regulation of protein localization	208	411	1.7	0	3.53912e-07	NADK,PRKCZ,TGFB1,ADCYAP1,ARHGDIA,PTN,JAK2,HDAC6,SAA1,ROCK2,PRKACA,SFRP1,CSK,LRRC15,TGFB3,RAB11A,LCP1,ZFAND1,NUCB1,CLSTN3,DAB2,RAB11FIP3,FLNA,SYTL4,GOLPH3L,INHBB,MAPK8,GLUL,VIL1,GSK3A,PPP2R5A,BCL2,GRIPAP1,CD36,CTNNB1,LDLRAP1,SNX12,RAC2,PDPK1,SRC,CCNE1,HADH,ERBB2,TRIM40,GJA1,TSG101,RER1,PTPN11,MRAP,PTGS2,AKT1,ARFIP1,ZC3H12A,PID1,AKT2,GSK3B,BMP4,PRKAA2,PPP1R9B,FYN,STAC,PICK1,FKBP1B,NUMB,SMAD3,USP8,G…
regulation of localization	572	1278	1.4	0	6.7085e-07	NADK,PRKCZ,CLEC7A,AP1AR,CD4,TGFB1,NPPA,SOD1,RUVBL1,ADCYAP1,MDK,PLA2G5,CSF1,ARHGDIA,AHSG,None,PTN,BMP10,MICAL1,JAK2,PLA2G10,PON1,KEL,HDAC6,NETO1,SAA1,CCL27,CHST4,FERMT3,FGF22,EDN1,ROCK2,SNTA1,SVBP,ITGA2B,PRKACA,THBS4,ILK,RAB7A,ITGAV,SFRP1,PPIF,CSK,PLXNA4,GPNMB,LRRC15,TGFB3,PRKCA,FER,RAB11A,LCP1,SNX5,ZFAND1,DNM1,KIT,PTK2B,UBASH3B,STK24,CEP43,PAX8,RHOC,RAB21,NUCB1,LYN,SERPINB3,AKT3,XCL1,PRKCB,INPP5F…
viral budding	15	15	Inf	0	6.73793e-07	CHMP1A,CHMP2B,CHMP1B,SNF8,TSG101,VTA1,VPS4A,CHMP2A,VPS28,VPS4B,CHMP6,PDCD6IP,LRSAM1,MVB12B,CHMP4A
cellular protein metabolic process	862	1997	1.3	0	7.32753e-07	ISG15,PRKCZ,CLEC7A,TCL1B,PSMA2,CD4,TNFSF10,TGFB1,NPPA,VIM,SOD1,RUVBL1,MRPS14,CCNA1,ADCYAP1,C12orf65,CSF1,AHSG,None,CTSG,BMP10,KNG1,MICAL1,GALNT3,FCGR1A,PRDX4,CTSF,JAK2,PLA2G10,WARS1,MAP2K4,ABHD12,EVPL,HDAC6,CHST4,FGFR3,B4GALT3,WFIKKN1,FGF22,SPINT1,EDN1,ROCK2,SNTA1,SVBP,PRKACA,THBS4,DAPP1,ILK,RAB7A,KLHL3,SFRP1,PPIF,CSK,GPNMB,NTRK2,CRIM1,TGFB3,PRKCA,FER,SNX5,WARS2,DUSP28,ANAPC7,ANAPC10,KIT,CTDSP1,P…
regulation of cellular protein localization	141	265	1.8	0	8.8862e-07	PRKCZ,TGFB1,PTN,JAK2,ROCK2,PRKACA,CSK,LRRC15,RAB11A,LCP1,ZFAND1,NUCB1,DAB2,FLNA,MAPK8,GLUL,VIL1,GSK3A,PPP2R5A,GRIPAP1,CD36,CTNNB1,LDLRAP1,RAC2,PDPK1,SRC,CCNE1,ERBB2,TRIM40,TSG101,RER1,PTPN11,MRAP,PTGS2,AKT1,ZC3H12A,PID1,AKT2,GSK3B,BMP4,PRKAA2,PPP1R9B,FYN,STAC,NUMB,SMAD3,GBP1,VCPIP1,DMTN,BDNF,MESD,LZTFL1,PIN1,CIB1,VCP,NMT1,UFM1,STX4,CTNNA1,RNF31,SAR1A,NKD2,BICD1,VPS4A,RALB,BCL2L1,CCT5,GNAI1,MAPK1,…
organelle organization	550	1227	1.4	0	9.56743e-07	H2BU1,H2BC21,H2AW,H2BC12,PRKCZ,AP1AR,TNFSF10,VIM,SOD1,RUVBL1,CCNA1,MDK,PLA2G5,ARHGDIA,BMP10,MICAL1,PRC1,CHMP1A,JAK2,M1AP,EVPL,HDAC6,CCL27,BIN2,EDN1,ROCK2,ILK,RAB7A,SFRP1,PPIF,DBNL,VASP,TGFB3,PRKCA,BAP18,FER,RAB11A,FHOD1,LCP1,CALD1,ZFAND1,PDLIM1,ANAPC7,DNM1,CSRP2,KIT,ZWINT,PTK2B,DSTN,TNXB,RAB1A,ARPC1B,CEP43,VRK1,RHOC,CSRP1,CHMP2B,NAP1L1,AKT3,PRKCB,CAPZA1,MAPRE3,ANTXR1,HRG,HGS,CDK2,RILPL1,NPLOC4,NE…
protein metabolic process	983	2305	1.3	0	1.03394e-06	ISG15,MMP17,PRKCZ,CLEC7A,TCL1B,PSMA2,CD4,TNFSF10,TGFB1,NPPA,ADAMDEC1,VIM,SOD1,TMPRSS15,RUVBL1,MRPS14,CCNA1,ADCYAP1,C12orf65,CSF1,AHSG,None,CTSG,BMP10,KNG1,MICAL1,CHMP1A,GALNT3,FCGR1A,MMP16,PRDX4,CTSF,JAK2,PLA2G10,WARS1,KEL,MAP2K4,ABHD12,EVPL,HDAC6,CHST4,COMP,FGFR3,B4GALT3,PLG,WFIKKN1,FGF22,SPINT1,EDN1,ROCK2,SNTA1,SVBP,PRKACA,THBS4,DAPP1,ILK,RAB7A,KLHL3,ITGAV,SFRP1,PPIF,CSK,GPNMB,NTRK2,CRIM1,TGFB3…
multivesicular body organization	17	18	27	0	1.15232e-06	CHMP1A,RAB11A,CHMP2B,HGS,CHMP1B,SNF8,TSG101,IST1,VTA1,VPS4A,CHMP2A,VPS28,VPS4B,VPS25,CHMP6,PDCD6IP,CHMP4A
organonitrogen compound biosynthetic process	309	651	1.5	0	1.32675e-06	NADK,TGFB1,NPPA,VIM,MRPS14,C12orf65,SPTLC2,UPP1,None,GALNT3,WARS1,CHST4,B4GALT3,ROCK2,PRTFDC1,AK2,WARS2,PTK2B,CHST14,ZDHHC4,NME2,EIF4E,HARS1,GLUL,DARS1,MTHFS,IL4,NARS1,AASDHPPT,MAPK3,ILF3,BCL2,POFUT1,DDX6,CTNNB1,CHST2,EIF4A1,RPN2,NCK2,RPS6KB1,SPHK1,ERBB2,YARS1,EIF2B1,MARS1,GFPT2,AMPD2,CIRBP,RBM3,AKT1,ALG2,AARS1,DCTD,FURIN,ZC3H12A,EIF3M,PID1,KHSRP,DARS2,PLCB1,AKT2,EIF2S1,HSPB1,METAP1,GSPT2,EIF4H,I…
localization within membrane	155	299	1.7	0	2.01339e-06	PRKCZ,BSG,TGFB1,PTN,ROCK2,RAB7A,CSK,LRRC15,RAB11A,ADAM22,INPP5F,ZDHHC4,HGS,RILPL1,ARL6IP5,DAB2,RAB11FIP3,FLNA,SLC9A3R1,MYL12A,AGRN,GOLPH3L,MAPK8,SMURF1,VIL1,VPS53,PPP2R5A,SNX4,GRIPAP1,RAB3D,RAB3C,SNF8,LDLRAP1,SNX12,SSR2,PDPK1,ERBB2,NRXN1,ARL6IP1,RER1,MRAP,AKT1,DNM2,GGA1,SLMAP,F11R,REEP2,GET3,PID1,AKT2,TIMM10B,PPP1R9B,FYN,STAC,PICK1,NUMB,GOLPH3,GBP1,MICALL1,DMTN,RILPL2,MESD,LZTFL1,RAB3A,RABEP1,CIB…
localization	972	2286	1.3	0	2.60311e-06	NADK,ISG15,PRKCZ,CLEC7A,AP1AR,BSG,CD4,TGFB1,GFRA3,NPPA,SOD1,TMPRSS15,RUVBL1,ADCYAP1,MDK,PLA2G5,CSF1,ARHGDIA,AHSG,MRC2,None,PTN,BMP10,MICAL1,CHMP1A,FCGR1A,ASIC4,JAK2,PLA2G10,PLA2G2C,PON1,KEL,HDAC6,NETO1,SAA1,CCL27,CHST4,COMP,BIN2,FERMT3,FGF22,EDN1,ROCK2,SNTA1,SVBP,ITGA2B,PRKACA,THBS4,ILK,RAB7A,KLHL3,ITGAV,SFRP1,PPIF,ICAM3,CSK,DBNL,PLXNA4,GPNMB,LRRC15,ANXA11,NTRK2,TGFB3,PRKCA,FER,RAB11A,FHOD1,DCC,L…
regulation of translation	85	148	2.2	0	2.78473e-06	VIM,C12orf65,ROCK2,PTK2B,EIF4E,MAPK3,ILF3,DDX6,NCK2,RPS6KB1,ERBB2,CIRBP,RBM3,AKT1,AARS1,ZC3H12A,KHSRP,AKT2,EIF2S1,HSPB1,METAP1,EIF4H,IMPACT,SHMT2,EIF4A2,PA2G4,RBM4,EIF4G2,ASCC2,RPS6KA3,EIF2A,SAMD4B,TIA1,MKNK1,CNOT9,MAPK1,STAT3,FXR1,DPH2,EIF5A,EIF4B,ACO1,RHOA,DPH5,EIF3B,DHFR,NCL,TACO1,DAPK1,YBX1,CD28,PKM,DDX1,SYNCRIP,CCL5,CNOT1,PRR16,PRG3,HNRNPR,AGO1,GZMB,DAPK3,EIF4G1,DCPS,EIF1B,PNPT1,EIF1,FMR1,EI…
cellular catabolic process	431	948	1.4	0.001	3.51868e-06	ISG15,PSMA2,TGFB1,VIM,PLA2G5,SPTLC2,MPO,UPP1,PRDX4,CTSF,PLA2G10,PON1,ABHD12,HDAC6,ROCK2,PRKACA,RAB7A,KLHL3,PDE5A,PRKCA,SNX5,ANAPC7,ANAPC10,PYGB,PTK2B,RAB1A,UBA7,IVD,CHMP2B,AHCY,INPP5F,MMP12,HGS,CDK2,NT5C,NPLOC4,DAB2,KAT5,TOLLIP,SCARB2,PSMA1,TBK1,OPHN1,ATP6V1C2,ARFIP2,MAPK8,SMURF1,GLUL,MTHFS,XPNPEP1,IL4,INSR,MAPK3,GSK3A,BCL2,DERL1,CD36,FAP,USP4,MAGEA6,CTNNB1,CRAT,SNF8,RAB5A,HGF,ACOX1,STUB1,UFC1,IK…
positive regulation of organelle organization	124	233	1.8	0.001	4.05242e-06	AP1AR,TNFSF10,PLA2G5,BMP10,CCL27,EDN1,ROCK2,SFRP1,PPIF,VASP,TGFB3,FER,FHOD1,LCP1,ANAPC7,PTK2B,DSTN,ARPC1B,RHOC,NEK7,TNKS,FLNA,ARFIP2,MAPK8,MAPRE1,VIL1,ARPC3,GRB2,INSR,ATL3,MAPK3,GSK3A,PLEK,CTNNB1,HSPA1A,SRC,WAS,NCK2,SPHK1,FGF8,GMFG,DCN,ARFIP1,MAPK9,SIRT2,SPAST,PLCB1,GMFB,AKT2,GSK3B,PYCARD,PFN1,PICK1,SMAD3,ARPC2,PIP4K2B,PIP4K2A,NMT1,MAD2L1BP,APOA1,RAC1,DRG1,RALB,CCT5,ARL3,PNKP,ARPC5,MAPK1,CCT7,RHO…
platelet activation	50	78	2.9	0.001	4.95466e-06	JAK2,SAA1,COMP,FERMT3,ITGA2B,ILK,PRKCA,UBASH3B,CSRP1,LYN,MYL9,HRG,SERPINE2,FLNA,MYL12A,PLEK,SYK,SRC,CLIC1,TEC,MPL,PTPN6,F11R,HSPB1,METAP1,VAV1,FIBP,PIK3CA,PEAR1,DMTN,PLCG2,C1QTNF1,BLOC1S3,PPIA,PLA2G4A,PRKCQ,VWF,LCK,F2,PIK3CG,GP6,TREML1,SELP,MERTK,MAPK14,FN1,GP1BB,IL6,VCL,TLR4
protein localization to membrane	139	268	1.7	0.001	6.65868e-06	PRKCZ,BSG,TGFB1,PTN,ROCK2,RAB7A,CSK,LRRC15,RAB11A,ADAM22,ZDHHC4,HGS,RILPL1,ARL6IP5,DAB2,FLNA,SLC9A3R1,MYL12A,AGRN,GOLPH3L,MAPK8,SMURF1,VIL1,PPP2R5A,GRIPAP1,RAB3D,RAB3C,LDLRAP1,SSR2,PDPK1,ERBB2,NRXN1,ARL6IP1,RER1,MRAP,AKT1,GGA1,SLMAP,F11R,REEP2,GET3,PID1,AKT2,TIMM10B,PPP1R9B,FYN,STAC,PICK1,NUMB,GOLPH3,GBP1,MICALL1,DMTN,RILPL2,MESD,LZTFL1,RAB3A,RABEP1,CIB1,TIMM10,NMT1,RAB13,GGA3,STX4,EHD3,NKD2,ATP1…
regulation of cellular amide metabolic process	99	181	1.9	0.001	8.40162e-06	VIM,C12orf65,ROCK2,NTRK2,PTK2B,EIF4E,MAPK3,ILF3,GSK3A,DDX6,NCK2,RPS6KB1,SPHK1,ERBB2,CASP3,CIRBP,RBM3,AKT1,AARS1,ZC3H12A,KHSRP,AKT2,EIF2S1,HSPB1,METAP1,EIF4H,IMPACT,SHMT2,EIF4A2,PA2G4,RBM4,EIF4G2,ASCC2,PIN1,RPS6KA3,EIF2A,SAMD4B,GGA3,TIA1,MKNK1,CNOT9,MAPK1,STAT3,FXR1,DPH2,EIF5A,EIF4B,ACO1,RHOA,EPHA4,DPH5,EIF3B,CCN1,DHFR,NCL,TACO1,DAPK1,YBX1,CD28,PKM,DDX1,SYNCRIP,CCL5,CNOT1,PRR16,SIRT3,PRG3,HNRNPR,A…
vesicle-mediated transport	327	705	1.4	0.001	8.64585e-06	CLEC7A,AP1AR,NPPA,SOD1,TMPRSS15,PLA2G5,AHSG,MRC2,MICAL1,CHMP1A,FCGR1A,BIN2,RAB7A,ITGAV,ICAM3,CSK,DBNL,ANXA11,FER,RAB11A,SNX5,DNM1,KIT,RAB1A,RAB21,LYN,CHMP2B,BTK,PRKCB,INPP5F,COPB2,IL15RA,HGS,AP1S2,DAB2,RABIF,RAB5C,SCARB2,SCARF2,ARF5,OPHN1,RAB11FIP3,FLNA,SYTL4,GOLPH3L,CHMP1B,SNCG,RAB6B,CSNK1G1,ARF4,IL4,GRB2,SMAP1,INSR,VPS53,AP1G2,MAPK3,SNX4,NCKIPSD,PLEK,RAB5B,GRIPAP1,RAB3D,SYK,CD36,RAB3C,CTNNB1,SN…
negative regulation of protein metabolic process	262	552	1.5	0.001	9.51387e-06	ISG15,PRKCZ,TGFB1,NPPA,AHSG,KNG1,MICAL1,WARS1,HDAC6,WFIKKN1,SPINT1,EDN1,ROCK2,SNTA1,SVBP,ILK,ITGAV,SFRP1,NTRK2,CRIM1,CTDSP1,UBASH3B,PRKAR2B,CEP43,LYN,SERPINB3,INPP5F,HRG,SERPINE2,OPHN1,FLNA,ECM1,EIF4E,INHBB,CTDSPL,VIL1,BMP2,SERPINA3,ILF3,ITIH4,APCS,USP4,DDX6,CTNNB1,SNX12,HGF,PDPK1,CST7,HSPA1A,MINAR1,SRC,NCK2,SERPING1,TRIM40,OPRPN,AGT,CBL,CASP3,CIRBP,TSG101,ARL6IP1,SH3GL2,PTGS2,AKT1,FURIN,ZC3H12A,…
viral budding via host ESCRT complex	12	12	Inf	0.001	1.16119e-05	CHMP1A,CHMP2B,CHMP1B,SNF8,TSG101,VPS4A,CHMP2A,VPS28,VPS4B,CHMP6,PDCD6IP,CHMP4A
mitotic cytokinetic process	12	12	Inf	0.001	1.16119e-05	CHMP1A,CHMP2B,CHMP1B,MITD1,VPS4A,RHOA,CHMP2A,VPS4B,ARF1,CHMP6,PDCD6IP,CHMP4A
catabolic process	503	1132	1.3	0.001	1.17208e-05	ISG15,MMP17,PSMA2,TGFB1,VIM,PLA2G5,SPTLC2,MPO,MRC2,UPP1,MMP16,PRDX4,CTSF,PLA2G10,PLA2G2C,PON1,ABHD12,HDAC6,ROCK2,ENO2,PRKACA,PGLYRP2,RAB7A,KLHL3,PDE5A,PRKCA,SNX5,ANAPC7,ANAPC10,PYGB,INPP5B,PTK2B,INPP5A,RAB1A,UBA7,IVD,CHMP2B,AHCY,INPP5F,MMP12,HGS,CDK2,NT5C,NPLOC4,DAB2,KAT5,TOLLIP,SCARB2,YWHAH,PSMA1,TBK1,SERPINE2,OPHN1,FLNA,ATP6V1C2,ARFIP2,MAPK8,SMURF1,GLUL,MTHFS,XPNPEP1,GALK1,IL4,BPGM,INSR,PGK1,MA…
organelle assembly	133	257	1.7	0.001	1.22138e-05	PLA2G5,BMP10,PRC1,CHMP1A,HDAC6,BIN2,EDN1,RAB7A,DBNL,RAB11A,LCP1,CSRP2,RAB1A,CSRP1,CHMP2B,MAPRE3,HGS,CDK2,RILPL1,NEK7,TNKS,FLNA,CHMP1B,SMURF1,MAPRE1,VIL1,ARF4,GAP43,DDX6,SNF8,RAB5A,HSPA1A,SRC,TMOD3,NRXN1,CIRBP,TSG101,DNM2,MAPK9,EIF2S1,PRKAA2,KPNB1,SMAD4,MAP1LC3B,SEPTIN1,RILPL2,CEP41,TBC1D20,PIP4K2B,PIP4K2A,FLII,EIF2A,IST1,EHD3,DRG1,VTA1,BICD1,VPS4A,RALB,ARL3,RAB32,EHD1,LIMD1,TNNT2,MAPRE2,RHOA,B9D2…
protein-containing complex subunit organization	322	696	1.4	0.002	1.34533e-05	H2BU1,H2BC21,H2AW,CELF2,H2BC12,ISG15,PRKCZ,CLEC7A,AP1AR,TGFB1,ATF1,RUVBL1,PLA2G5,C12orf65,MPO,MICAL1,CHMP1A,JAK2,PLA2G10,WARS1,HDAC6,BIN2,FERMT3,PRKACA,DBNL,VASP,FER,LCP1,ZFAND1,PTK2B,DSTN,ARPC1B,RHOC,CHMP2B,NAP1L1,CAPZA1,MAPRE3,HRG,ARHGAP6,SLC9A3R1,ARFIP2,CHMP1B,MAPRE1,DARS1,VIL1,SRSF6,ARPC3,KLC1,GRB2,RASA1,INSR,ATL3,MAPK3,PLEK,APCS,SYK,CD36,USP4,STUB1,IKBKG,HSPA1A,RBBP4,SRC,WAS,NCK2,CDH5,HES5,A…
regulation of cellular component organization	473	1060	1.3	0.002	1.35406e-05	ISG15,PRKCZ,CLEC7A,AP1AR,TNFSF10,TGFB1,NPPA,EFNB3,VIM,ATF1,ADCYAP1,MDK,PLA2G5,ARHGDIA,PTN,BMP10,CHMP1A,WARS1,KEL,HDAC6,CCL27,EDN1,ROCK2,PRKACA,ILK,RAB7A,ITGAV,SFRP1,PPIF,DBNL,PLXNA4,NTRK2,VASP,TGFB3,FER,RAB11A,FHOD1,DCC,LCP1,ANAPC7,DNM1,KIT,ZWINT,PTK2B,STK24,DSTN,IP6K2,ARPC1B,CEP43,RHOC,RAB21,LYN,CHMP2B,INPP5F,CAPZA1,MAPRE3,ANTXR1,HRG,NME2,CLSTN3,SEMA3B,HDGFL2,NEK7,DAB2,CBLN2,RAB5C,SCARB2,YWHAH,T…
macroautophagy	68	117	2.2	0.002	1.59587e-05	SPTLC2,HDAC6,PRKACA,RAB7A,KLHL3,SNX5,RAB1A,CHMP2B,HGS,TBK1,ATP6V1C2,MAPK8,SMURF1,IL4,MAPK3,SNF8,RAB5A,UFC1,IKBKG,GNAI3,SRC,CASP3,TSG101,DCN,AKT1,PRKAA2,PIK3CA,ATP6V1C1,MAP1LC3B,PIP4K2B,PIP4K2A,VCP,UFM1,VTA1,VPS4A,RALB,GABARAPL1,CHMP2A,VPS28,VPS4B,VPS25,SNAP29,SCFD1,RAB1B,TBC1D25,DDRGK1,HMOX1,GABARAP,TBC1D5,VTI1B,ADPRH,ERN1,CDC37,CAPN1,CHMP6,PIK3C3,STX17,VPS26A,GABARAPL2,NSFL1C,RAB23,LRSAM1,ATG5,V…
autophagy	114	216	1.8	0.002	1.64376e-05	SPTLC2,HDAC6,PRKACA,RAB7A,KLHL3,SNX5,RAB1A,CHMP2B,HGS,KAT5,TOLLIP,TBK1,ATP6V1C2,ARFIP2,MAPK8,SMURF1,IL4,MAPK3,GSK3A,BCL2,MAGEA6,SNF8,RAB5A,HGF,STUB1,UFC1,IKBKG,GNAI3,SRC,CASP3,DEPP1,TSG101,IL10RA,DCN,AKT1,ZC3H12A,SIRT2,CPTP,GSK3B,HSPB1,PRKAA2,ABL2,PYCARD,ATG4C,PIK3CA,ATP6V1C1,ANXA7,MAP1LC3B,EIF4G2,MCL1,PIP4K2B,PIP4K2A,IFI16,VCP,UFM1,VTA1,VPS4A,RALB,STAT3,BAD,GABARAPL1,CHMP2A,ABL1,HAX1,FIS1,VPS28,…
process utilizing autophagic mechanism	114	216	1.8	0.002	1.64376e-05	SPTLC2,HDAC6,PRKACA,RAB7A,KLHL3,SNX5,RAB1A,CHMP2B,HGS,KAT5,TOLLIP,TBK1,ATP6V1C2,ARFIP2,MAPK8,SMURF1,IL4,MAPK3,GSK3A,BCL2,MAGEA6,SNF8,RAB5A,HGF,STUB1,UFC1,IKBKG,GNAI3,SRC,CASP3,DEPP1,TSG101,IL10RA,DCN,AKT1,ZC3H12A,SIRT2,CPTP,GSK3B,HSPB1,PRKAA2,ABL2,PYCARD,ATG4C,PIK3CA,ATP6V1C1,ANXA7,MAP1LC3B,EIF4G2,MCL1,PIP4K2B,PIP4K2A,IFI16,VCP,UFM1,VTA1,VPS4A,RALB,STAT3,BAD,GABARAPL1,CHMP2A,ABL1,HAX1,FIS1,VPS28,…
regulation of cellular component size	98	181	1.9	0.002	1.64675e-05	AP1AR,KEL,EDN1,ILK,DBNL,PLXNA4,VASP,FER,RAB11A,DCC,PTK2B,DSTN,ARPC1B,RAB21,AKT3,CAPZA1,SEMA3B,SLC9A3R1,L1CAM,ARFIP2,VIL1,ARPC3,NAA80,GRB2,RASA1,PLEK,RAB5A,WAS,NCK2,TMOD3,GMFG,CRABP2,NTN1,NEFL,RAB22A,AKT1,ARFIP1,DNM2,SEMA4G,GMFB,GSK3B,VAV1,PYCARD,PFN1,PICK1,PIK3CA,ISLR2,DMTN,BDNF,ARPC2,EIF4G2,AKT1S1,SEMA6D,FLII,IST1,RAC1,ARPC5,RHOA,TWF2,CDH4,ABL1,HAX1,GSN,IL7R,ADD2,TMOD2,CCL26,VEGFA,BAG4,TWF1,PRR1…
endosome transport via multivesicular body sorting pathway	14	15	22.2	0.002	1.668e-05	CHMP1A,CHMP2B,CHMP1B,SNF8,DENND10,VCP,VTA1,CHMP2A,VPS28,VPS4B,VPS25,CHMP6,RILP,CHMP4A
regulation of transport	360	790	1.4	0.002	2.11265e-05	NADK,PRKCZ,CLEC7A,CD4,TGFB1,NPPA,SOD1,ADCYAP1,PLA2G5,AHSG,MICAL1,JAK2,PLA2G10,PON1,KEL,NETO1,SAA1,EDN1,SNTA1,PRKACA,RAB7A,ITGAV,SFRP1,PPIF,CSK,TGFB3,FER,RAB11A,LCP1,SNX5,ZFAND1,DNM1,PTK2B,UBASH3B,PAX8,RAB21,NUCB1,LYN,XCL1,PRKCB,INPP5F,IL15RA,PIM1,HGS,ARL6IP5,DAB2,RAB5C,YWHAH,SERPINE2,CXCL10,OPHN1,RAB11FIP3,FLNA,PPP1CC,SLC9A3R1,SYTL4,CNTN1,GOLPH3L,INHBB,MAPK8,GLUL,SNCG,CLIC3,IL4,BMP2,SMAP1,INSR,MA…
virion assembly	19	23	7.5	0.002	2.15126e-05	CHMP1A,RAB1A,CHMP2B,CHMP1B,DDX6,SNF8,TSG101,TBC1D20,VTA1,VPS4A,CHMP2A,VPS28,VPS4B,RAB1B,CHMP6,PDCD6IP,LRSAM1,MVB12B,CHMP4A
response to wounding	166	334	1.6	0.002	2.19905e-05	CLEC7A,TGFB1,SOD1,MDK,PTN,KNG1,JAK2,MAP2K4,EVPL,SAA1,COMP,FERMT3,PLG,EDN1,ITGA2B,ILK,TGFB3,PRKCA,UBASH3B,STK24,RHOC,CSRP1,LYN,MYL9,INPP5F,MMP12,HRG,SERPINE2,FLNA,SYTL4,MYL12A,INHBB,ITGA5,MPIG6B,VIL1,SRSF6,ARF4,GAP43,BCL2,PLEK,APCS,SYK,CD36,FAP,PAFAH2,SRC,WAS,ERBB2,SERPING1,CASP3,GJA1,NEFL,DCN,CLIC1,TEC,MPL,PTPN6,F11R,HPSE,TNFAIP3,GPX1,MCAM,HSPB1,POSTN,METAP1,VAV1,FIBP,PIK3CA,SMAD2,FKBP1B,LGALS1,S…
establishment of protein localization to organelle	92	169	1.9	0.002	2.24435e-05	TGFB1,JAK2,RAB7A,RAB11A,MMP12,HGS,SCARB2,FLNA,MAPK8,SMURF1,GSK3A,SYK,CD36,SNF8,RAC2,HIKESHI,AGT,TSG101,IL10RA,PTGS2,AKT1,ZC3H12A,TNFAIP3,GET3,BMP4,TIMM10B,KPNB1,SMAD3,NAGPA,PPP3CA,TIMM10,NMT1,UFM1,GGA3,RNF31,SNUPN,SAMM50,VPS4A,CCT5,TIMM8A,MAPK1,STAT3,CCT7,UBE2D3,RAB8B,SHH,CCT8,KPNA5,HAX1,FIS1,PML,VPS28,HSPD1,VPS25,UBL5,PIH1D1,KPNA6,TIMM50,BAG4,MED1,TOMM20,SGTA,KPNA1,PEX14,RAN,CSNK2A2,APOD,AIFM1,H…
endomembrane system organization	107	202	1.8	0.002	2.43115e-05	SOD1,CHMP1A,BIN2,RAB7A,PRKCA,RAB11A,DNM1,RAB1A,VRK1,CHMP2B,PRKCB,HGS,NPLOC4,SCARB2,SERPINE2,SLC9A3R1,SYTL4,GOLPH3L,CHMP1B,ATL3,MAPK3,SNF8,HIKESHI,PACSIN2,TSG101,ARL6IP1,YWHAZ,SH3GL2,RAB22A,AKT1,DNM2,SIRT2,SPAST,REEP2,GET3,AKT2,CR1,RAB18,POLR2M,MTSS2,USP8,GOLPH3,VCPIP1,MICALL1,TMEM38B,TBC1D20,BLOC1S1,RAB3A,BLOC1S3,STX4,UBE2I,IST1,EHD3,VTA1,VPS4A,MAPK1,RAB2A,LMAN2L,TGFB2,PACSIN1,CHMP2A,GSN,VPS28,OS…
phosphorus metabolic process	579	1325	1.3	0.002	2.46419e-05	NADK,PRKCZ,CLEC7A,TCL1B,CD4,TGFB1,NPPA,SOD1,CCNA1,ADCYAP1,PLA2G5,CSF1,SPTLC2,UPP1,CTSG,BMP10,MICAL1,FCGR1A,PRDX4,JAK2,PLA2G10,PLA2G2C,PON1,WARS1,MAP2K4,ABHD12,HDAC6,FGFR3,FGF22,EDN1,ROCK2,ENO2,PRKACA,THBS4,DAPP1,ILK,SFRP1,CSK,PDE5A,GPNMB,NTRK2,TGFB3,PRKCA,FER,AK2,DUSP28,KIT,CTDSP1,INPP5B,PTK2B,UBASH3B,STK24,IP6K2,TNXB,INPP5A,PRKAR2B,CEP43,VRK1,LYN,BTK,SERPINB3,AKT3,PRKCB,INPP5F,FGF3,MAPRE3,HRG,PI…
cellular response to chemical stress	99	185	1.8	0.003	2.83465e-05	SOD1,MPO,JAK2,HDAC6,PPIF,FER,STK24,BTK,STAT6,NME2,ARL6IP5,PENK,MAPK8,MGMT,MAPK3,BCL2,CD36,CTNNB1,HGF,HSPA1A,SRC,SPHK1,CASP3,PTPN11,PTGS2,AKT1,ZC3H12A,MAPK9,SIRT2,ZNF580,TNFAIP3,GPX1,EIF2S1,HSPB1,PRKAA2,FYN,IMPACT,PIK3CA,ALOX5,MCL1,PLA2R1,STX4,AIF1,MAPK1,NCOA7,BAD,XRCC6,ABL1,PAWR,RIPK1,PML,MGAT3,FBLN5,DHFR,ANKRD2,PRDX3,PPIA,DAPK1,HMOX1,HSF1,AKR1B1,BMP7,NUDT2,DIABLO,HSPA1B,CAB39,NONO,LANCL1,MAPK10,…
cellular component biogenesis	504	1142	1.3	0.003	2.87949e-05	H2BU1,H2BC21,CELF2,H2BC12,ISG15,PRKCZ,CLEC7A,AP1AR,TGFB1,ATF1,RUVBL1,PLA2G5,BMP10,MICAL1,PRC1,CHMP1A,JAK2,WARS1,M1AP,HDAC6,BIN2,FERMT3,EDN1,ROCK2,PRKACA,ILK,RAB7A,SFRP1,DBNL,NTRK2,VASP,TGFB3,PRKCA,FER,RAB11A,FHOD1,LCP1,CALD1,PDLIM1,CSRP2,KIT,PTK2B,TNXB,RAB1A,ARPC1B,RHOC,CSRP1,CHMP2B,NAP1L1,CAPZA1,MAPRE3,ANTXR1,HRG,HGS,CDK2,RILPL1,CLSTN3,NEK7,CBLN2,TNKS,ARHGAP6,OPHN1,FLNA,SLC9A3R1,AGRN,NECTIN1,ARF…
protein localization to organelle	165	333	1.6	0.003	2.88797e-05	ISG15,PRKCZ,TGFB1,JAK2,ROCK2,PRKACA,RAB7A,RAB11A,ADAM22,MMP12,MAPRE3,HGS,TOLLIP,SCARB2,TNKS,RAB11FIP3,FLNA,MAPK8,SMURF1,GLUL,MAPRE1,ARF4,GSK3A,SYK,CD36,SNF8,RAC2,VAPA,HIKESHI,SRC,PACSIN2,TRIM40,AGT,GJA1,TSG101,IL10RA,ARL2BP,RER1,PTGS2,AKT1,ZC3H12A,GGA1,TNFAIP3,GET3,GSK3B,BMP4,TIMM10B,PPP1R9B,FYN,KPNB1,SMAD3,GOLPH3,GBP1,NAGPA,VCPIP1,MICALL1,LZTFL1,PPP3CA,PIN1,RABEP1,TIMM10,VCP,NMT1,UFM1,GGA3,CTNNA…
blood coagulation	80	144	2	0.003	2.92318e-05	KNG1,JAK2,SAA1,COMP,FERMT3,PLG,EDN1,ITGA2B,ILK,PRKCA,UBASH3B,CSRP1,LYN,MYL9,HRG,SERPINE2,FLNA,MYL12A,MPIG6B,PLEK,SYK,CD36,FAP,PAFAH2,SRC,WAS,SERPING1,CLIC1,TEC,MPL,PTPN6,F11R,HPSE,HSPB1,METAP1,VAV1,FIBP,PIK3CA,PEAR1,DMTN,PLCG2,C1QTNF1,BLOC1S3,F8,SHH,TFPI,HGFAC,PPIA,PLA2G4A,F9,PRKCQ,VWF,PROCR,F11,F3,SERPINA1,SERPINA10,LCK,GP5,KRT1,F2,PLAT,PIK3CG,GP6,TREML1,SELP,MERTK,SCUBE1,ITPK1,MAPK14,ENTPD1,FN1…
negative regulation of cellular protein metabolic process	243	514	1.5	0.003	2.92696e-05	ISG15,PRKCZ,TGFB1,NPPA,AHSG,KNG1,MICAL1,WARS1,HDAC6,WFIKKN1,SPINT1,EDN1,ROCK2,SNTA1,SVBP,ILK,SFRP1,CRIM1,CTDSP1,UBASH3B,PRKAR2B,CEP43,LYN,SERPINB3,INPP5F,HRG,SERPINE2,OPHN1,ECM1,EIF4E,CTDSPL,VIL1,BMP2,SERPINA3,ILF3,ITIH4,USP4,DDX6,CTNNB1,SNX12,HGF,PDPK1,CST7,HSPA1A,MINAR1,SRC,NCK2,SERPING1,OPRPN,AGT,CBL,CASP3,CIRBP,TSG101,ARL6IP1,SH3GL2,PTGS2,AKT1,FURIN,ZC3H12A,PTPN6,CDKN2D,SIRT2,TNFAIP3,GPX1,PID…
response to organic substance	652	1508	1.3	0.003	3.14862e-05	NADK,ISG15,SFRP5,IL22RA1,PRKCZ,CLEC7A,BSG,CD4,TNFSF10,TGFB1,NPPA,MX1,VIM,SOD1,H2AZ1,ATF1,ADCYAP1,MDK,CSF1,ARHGDIA,AHSG,MPO,ZBP1,None,FGFBP3,CTSG,PTN,BMP10,EDA2R,GALNT3,JAK2,PON1,MAP2K4,HDAC6,COMP,FGFR3,LTA,WFIKKN1,FGF22,SPINT1,EDN1,ROCK2,PRKACA,THBS4,IL12RB1,ILK,SFRP1,CSK,LUM,NTRK2,CRIM1,TGFB3,PRKCA,FER,SNX5,ADAM23,DNM1,KIT,PTK2B,IP6K2,PRKAR2B,ARPC1B,PAX8,LYN,BTK,STAT6,XCL1,PRKCB,IL15RA,FGF3,MMP1…
regulation of proteolysis	206	428	1.5	0.003	3.17075e-05	CLEC7A,TNFSF10,AHSG,KNG1,MICAL1,JAK2,HDAC6,WFIKKN1,SPINT1,ROCK2,SVBP,PRKACA,CRIM1,INPP5B,PTK2B,LYN,SERPINB3,ANTXR1,HRG,CDK2,ARL6IP5,DAB2,CLEC3B,SERPINE2,OPHN1,ECM1,SMURF1,MGMT,VIL1,SERPINA3,GSK3A,ITIH4,SYK,SNX12,HGF,STUB1,CST7,HSPA1A,TANK,SRC,CRADD,SERPING1,OPRPN,AGT,ARL6IP1,PTGS2,AKT1,FURIN,ZC3H12A,MAPK9,CDKN2D,SIRT2,GPX1,UBE2K,CR1,GSK3B,PYCARD,FYN,CEBPA,ITIH1,SMAD3,SERPINB13,GIPC1,ITIH2,RPS6KA3…
cellular component assembly	481	1087	1.3	0.003	3.34673e-05	H2BU1,H2BC21,CELF2,H2BC12,ISG15,PRKCZ,CLEC7A,AP1AR,TGFB1,ATF1,RUVBL1,PLA2G5,BMP10,MICAL1,PRC1,CHMP1A,JAK2,WARS1,M1AP,HDAC6,BIN2,FERMT3,EDN1,ROCK2,PRKACA,ILK,RAB7A,SFRP1,DBNL,NTRK2,VASP,TGFB3,PRKCA,FER,RAB11A,FHOD1,LCP1,CALD1,PDLIM1,CSRP2,KIT,PTK2B,TNXB,RAB1A,ARPC1B,RHOC,CSRP1,CHMP2B,NAP1L1,CAPZA1,MAPRE3,ANTXR1,HRG,HGS,CDK2,RILPL1,CLSTN3,NEK7,CBLN2,TNKS,ARHGAP6,OPHN1,FLNA,SLC9A3R1,AGRN,NECTIN1,ARF…
phosphate-containing compound metabolic process	573	1313	1.3	0.003	3.34751e-05	NADK,PRKCZ,CLEC7A,TCL1B,CD4,TGFB1,NPPA,SOD1,CCNA1,ADCYAP1,PLA2G5,CSF1,SPTLC2,UPP1,CTSG,BMP10,MICAL1,FCGR1A,PRDX4,JAK2,PLA2G10,PLA2G2C,PON1,WARS1,MAP2K4,ABHD12,HDAC6,FGFR3,FGF22,EDN1,ROCK2,ENO2,PRKACA,THBS4,DAPP1,ILK,SFRP1,CSK,PDE5A,GPNMB,NTRK2,TGFB3,PRKCA,FER,AK2,DUSP28,KIT,CTDSP1,INPP5B,PTK2B,UBASH3B,STK24,IP6K2,TNXB,INPP5A,PRKAR2B,CEP43,VRK1,LYN,BTK,SERPINB3,AKT3,PRKCB,INPP5F,FGF3,MAPRE3,HRG,PI…
hemostasis	81	147	2	0.003	3.88108e-05	KNG1,JAK2,SAA1,COMP,FERMT3,PLG,EDN1,ITGA2B,ILK,PRKCA,UBASH3B,CSRP1,LYN,MYL9,HRG,SERPINE2,FLNA,MYL12A,MPIG6B,PLEK,SYK,CD36,FAP,PAFAH2,SRC,WAS,SERPING1,FLI1,CLIC1,TEC,MPL,PTPN6,F11R,HPSE,HSPB1,METAP1,VAV1,FIBP,PIK3CA,PEAR1,DMTN,PLCG2,C1QTNF1,BLOC1S3,F8,SHH,TFPI,HGFAC,PPIA,PLA2G4A,F9,PRKCQ,VWF,PROCR,F11,F3,SERPINA1,SERPINA10,LCK,GP5,KRT1,F2,PLAT,PIK3CG,GP6,TREML1,SELP,MERTK,SCUBE1,ITPK1,MAPK14,ENTPD…
cellular component disassembly	112	215	1.7	0.003	4.12547e-05	H2AW,TGFB1,C12orf65,CTSG,MICAL1,CHMP1A,HDAC6,PLG,TGFB3,PRKCA,LCP1,ZFAND1,DSTN,VRK1,CHMP2B,PRKCB,CAPZA1,MMP12,CHMP1B,VIL1,KLC1,INSR,GSK3A,PLEK,CMA1,FAP,UFC1,TMOD3,TSG101,FURIN,SPAST,GSK3B,PPP1R9B,GSPT2,PIK3CA,ADAM15,IGF1R,DUSP3,MAP1LC3B,DMTN,KLK4,CIB1,FLII,VCP,UFM1,IST1,VTA1,VPS4A,MTIF3,MAPRE2,EIF5A,TPSAB1,EPHA4,TWF2,GABARAPL1,CHMP2A,ELANE,HAX1,GSN,FIS1,ADD2,VPS4B,TMOD2,DDR1,SNAP29,TBC1D25,DDRGK1,…
membrane organization	169	344	1.6	0.003	4.22233e-05	SOD1,PLA2G5,PTN,CHMP1A,FCGR1A,BIN2,RAB7A,PPIF,PRKCA,DNM1,RAB1A,VRK1,CHMP2B,PRKCB,HGS,RILPL1,RABIF,GRAMD1C,SLC9A3R1,SYTL4,AGRN,GOLPH3L,CHMP1B,MAPK8,SMURF1,GSK3A,BCL2,CD36,MITD1,RAC2,VAPA,HSPA1A,GNAI3,PACSIN2,SPHK1,NRXN1,ARL6IP1,PLEKHA3,RER1,SH3GL2,GDNF,AKT1,DNM2,THEM4,SIRT2,SPAST,REEP2,GET3,CPTP,AKT2,CR1,GSK3B,TIMM10B,CETP,ARFGAP2,PICK1,MTSS2,GOLPH3,ANXA7,RHOT1,VCPIP1,MICALL1,ARHGAP25,RILPL2,MESD,…
response to oxidative stress	128	251	1.7	0.003	4.40351e-05	SOD1,MPO,PRDX4,JAK2,HDAC6,EDN1,PPIF,FER,PDLIM1,PTK2B,STK24,BTK,STAT6,NME2,ARL6IP5,PENK,MAPK8,MGMT,ATRN,MAPK3,BCL2,CD36,CTNNB1,HGF,HSPA1A,SRC,SPHK1,FGF8,CASP3,PTPN11,HMOX2,PTGS2,AKT1,ZC3H12A,MAPK9,SIRT2,ZNF580,TNFAIP3,GPX1,EIF2S1,HSPB1,PRKAA2,FYN,IMPACT,FKBP1B,CAT,TPO,ALOX5,MCL1,PLA2R1,STX4,PNKP,AIF1,MAPK1,NCOA7,NUDT15,BAD,NEIL1,ABL1,PAWR,RIPK1,PML,MGAT3,FBLN5,DHFR,ANKRD2,TRA2B,HSPD1,PRDX3,PPIA,DA…
cellular response to oxygen-containing compound	265	569	1.4	0.004	4.83931e-05	NADK,PRKCZ,CLEC7A,TGFB1,VIM,SOD1,H2AZ1,AHSG,MPO,CTSG,PTN,JAK2,MAP2K4,HDAC6,EDN1,ROCK2,PRKACA,SFRP1,PPIF,CSK,NTRK2,PRKCA,FER,SNX5,ZFAND1,PTK2B,IP6K2,LYN,BTK,STAT6,PRKCB,PIM1,NME2,CDK2,KAT5,RGS10,CXCL10,GRAMD1C,FLNA,SLC9A3R1,AGRN,EIF4E,INHBB,PENK,MAPK8,GRB2,INSR,MAPK3,GSK3A,CMA1,CD36,CTNNB1,AHCYL1,HGF,PDPK1,GNAI3,SRC,RPS6KB1,SPHK1,AGT,MARS1,MAP2K6,GJA1,PTPN11,CXCL3,PTGS2,AKT1,GRK2,ZC3H12A,DNM2,MAPK…
regulation of protein-containing complex assembly	109	209	1.8	0.004	4.90065e-05	ISG15,PRKCZ,CLEC7A,AP1AR,TGFB1,WARS1,HDAC6,DBNL,VASP,FER,LCP1,PTK2B,ARPC1B,RHOC,CAPZA1,MAPRE3,HRG,ARFIP2,MAPRE1,VIL1,ARPC3,GRB2,RASA1,PLEK,SYK,CD36,STUB1,HSPA1A,SRC,WAS,NCK2,CDH5,TMOD3,GMFG,PTPN11,ARFIP1,MAPK9,CPTP,SOST,GMFB,GSK3B,PYCARD,PFN1,PICK1,IMPACT,DMTN,ARPC2,RAB3A,PLCG2,FLII,VCP,AIDA,STXBP6,SAR1A,RAC1,DRG1,RALB,ARL3,PPM1A,ARPC5,CXCL13,RHOA,TWF2,TIRAP,ABL1,HAX1,GSN,CDH17,ADD2,CDC42,TMOD2,C…
mitotic cytokinesis	22	29	5	0.004	5.45308e-05	CHMP1A,ROCK2,RHOC,CHMP2B,CHMP1B,RASA1,MITD1,SPAST,USP8,VPS4A,ARL3,RHOA,SEPTIN6,CHMP2A,VPS4B,STAMBP,ARF1,CHMP6,PDCD6IP,KIF23,RACGAP1,CHMP4A
regulation of establishment of protein localization	132	261	1.6	0.004	5.55873e-05	NADK,PRKCZ,TGFB1,JAK2,HDAC6,SAA1,PRKACA,SFRP1,CSK,TGFB3,RAB11A,LCP1,ZFAND1,NUCB1,RAB11FIP3,FLNA,SYTL4,GOLPH3L,INHBB,MAPK8,GLUL,GSK3A,GRIPAP1,CD36,SNX12,RAC2,SRC,HADH,ERBB2,GJA1,TSG101,PTPN11,PTGS2,ARFIP1,ZC3H12A,AKT2,GSK3B,BMP4,FYN,PICK1,FKBP1B,SMAD3,GOLPH3,DMTN,ALOX5,PPP3CA,ENSA,C1QTNF3,ACHE,CIB1,NMT1,UFM1,STX4,RNF31,SAR1A,RAC1,CCT5,MAPK1,CCT7,UBE2D3,TGFB2,BAD,C2CD2L,OXCT1,SHH,CCT8,PTP4A3,HAX1,F…
coagulation	80	146	1.9	0.004	5.62774e-05	KNG1,JAK2,SAA1,COMP,FERMT3,PLG,EDN1,ITGA2B,ILK,PRKCA,UBASH3B,CSRP1,LYN,MYL9,HRG,SERPINE2,FLNA,MYL12A,MPIG6B,PLEK,SYK,CD36,FAP,PAFAH2,SRC,WAS,SERPING1,CLIC1,TEC,MPL,PTPN6,F11R,HPSE,HSPB1,METAP1,VAV1,FIBP,PIK3CA,PEAR1,DMTN,PLCG2,C1QTNF1,BLOC1S3,F8,SHH,TFPI,HGFAC,PPIA,PLA2G4A,F9,PRKCQ,VWF,PROCR,F11,F3,SERPINA1,SERPINA10,LCK,GP5,KRT1,F2,PLAT,PIK3CG,GP6,TREML1,SELP,MERTK,SCUBE1,ITPK1,MAPK14,ENTPD1,FN1…
protein localization to plasma membrane	77	140	2	0.005	6.52288e-05	PRKCZ,BSG,TGFB1,ROCK2,RAB7A,CSK,LRRC15,RAB11A,RILPL1,ARL6IP5,DAB2,FLNA,SLC9A3R1,MYL12A,GOLPH3L,SMURF1,VIL1,PPP2R5A,GRIPAP1,RAB3D,RAB3C,LDLRAP1,PDPK1,RER1,MRAP,AKT1,GGA1,SLMAP,F11R,PID1,AKT2,PPP1R9B,STAC,NUMB,GOLPH3,GBP1,RILPL2,RAB3A,CIB1,RAB13,GGA3,STX4,EHD3,NKD2,ATP1B1,VPS4A,BCL2L1,EHD1,RAB8B,PPFIA1,PACSIN1,STX7,RHOQ,BAG4,VTI1B,MRAP2,TREM2,RAB31,DPP10,TESC,CSRP3,CACNB3,WNK3,IKBKB,EZR,CNPY4,ADIPO…
cellular response to organic substance	525	1201	1.3	0.005	6.62065e-05	NADK,ISG15,SFRP5,IL22RA1,PRKCZ,CLEC7A,CD4,TGFB1,MX1,VIM,SOD1,H2AZ1,ADCYAP1,CSF1,ARHGDIA,AHSG,ZBP1,None,FGFBP3,CTSG,PTN,BMP10,EDA2R,GALNT3,JAK2,MAP2K4,HDAC6,COMP,FGFR3,WFIKKN1,FGF22,SPINT1,EDN1,ROCK2,PRKACA,IL12RB1,ILK,SFRP1,CSK,NTRK2,CRIM1,TGFB3,PRKCA,FER,SNX5,ADAM23,KIT,PTK2B,PAX8,LYN,BTK,STAT6,XCL1,PRKCB,IL15RA,FGF3,MMP12,HRG,PIM1,NME2,HGS,OAS1,ARL6IP5,DAB2,KAT5,TOLLIP,IL22RA2,YWHAH,CLEC3B,TBK1…
muscle system process	98	186	1.8	0.005	6.99626e-05	NPPA,SOD1,BMP10,SNTB1,MAP2K4,COMP,EDN1,ROCK2,SNTA1,PRKACA,PRKCA,CALD1,KIT,MYL9,INPP5F,LTB4R,FLNA,SSPN,SMAD5,GSK3A,SPHK1,AGT,TMOD3,MAP2K6,GJA1,GDNF,PTGS2,GRK2,ZC3H12A,TPM4,SLMAP,HOMER1,STAC,PIK3CA,FKBP1B,PDLIM5,SMAD4,SMAD3,TMEM38B,PPP3CA,PIN1,HAMP,EHD3,ATP1B1,SETD3,AIF1,TNNT2,FGF12,RHOA,ENO1,GSN,ANKRD2,TMOD2,HMOX1,MYL6,SMTN,MYOC,CAMK2D,TWF1,CAMK2B,PIK3CG,TPM2,TMOD1,DAPK3,SCO2,CNN1,GPD1L,IL1B,SCN2B…
midbody abscission	10	10	Inf	0.006	7.73704e-05	CHMP1A,CHMP2B,CHMP1B,MITD1,VPS4A,CHMP2A,VPS4B,CHMP6,PDCD6IP,CHMP4A
regulation of intracellular transport	85	158	1.9	0.006	8.05899e-05	TGFB1,JAK2,PRKACA,LCP1,ZFAND1,RAB21,NUCB1,INPP5F,DAB2,FLNA,PPP1CC,MAPK8,MAPK3,GSK3A,GRIPAP1,CD36,LDLRAP1,SNX12,RAC2,SRC,ERBB2,PTPN11,PTGS2,ARFIP1,ZC3H12A,REEP2,AKT2,GSK3B,BMP4,SCP2,FYN,DENND10,SMAD3,RHOT1,DMTN,RBM4,TBC1D20,CIB1,NMT1,UFM1,RNF31,SAR1A,EHD1,MAPK1,TNNT2,UBE2D3,SHH,HAX1,FIS1,CDC42,SCFD1,UBL5,RAB11B,BAG4,PCSK9,RAN,CSNK2A2,APOD,ARF1,GZMB,MIEF1,ABLIM3,IL1B,ARHGAP1,MAP2K1,MSN,NDEL1,CACNB3…
platelet aggregation	32	48	3.2	0.006	8.34703e-05	JAK2,COMP,FERMT3,ITGA2B,ILK,PRKCA,UBASH3B,CSRP1,LYN,MYL9,SERPINE2,FLNA,MYL12A,PLEK,SYK,CLIC1,MPL,PTPN6,F11R,HSPB1,METAP1,FIBP,PEAR1,DMTN,C1QTNF1,PPIA,PRKCQ,PIK3CG,GP6,FN1,IL6,VCL
regulation of protein catabolic process	104	200	1.7	0.006	8.48122e-05	PRKACA,RAB7A,PTK2B,HGS,CDK2,DAB2,SERPINE2,OPHN1,FLNA,SMURF1,GSK3A,SNF8,SNX12,STUB1,HSPA1A,TRIM40,GJA1,AKT1,FURIN,MAPK9,SIRT2,GGA1,TNFAIP3,GPX1,UBE2K,WWP1,GSK3B,FYN,CEBPA,SMAD3,USP8,GIPC1,PIN1,HAMP,VCP,GGA3,NKD2,SNX1,SMURF2,UCHL5,NUDT15,TIMP1,EPHA4,PDCL3,CSNK2A1,SHH,PML,MGAT3,VPS28,DDRGK1,NUB1,ARAF,GABARAP,PSMC5,PCSK9,HSPA1B,SGTA,RAD23B,EGF,WWP2,CSNK2A2,PTEN,CHMP6,CAMLG,BAG6,C4BPA,TREM2,UBE2V2,UBB…
mitochondrial RNA metabolic process	14	16	11.1	0.006	8.53508e-05	WARS2,DARS2,TFAM,MRPL12,TFB1M,HSD17B10,TFB2M,SARS2,GARS1,CHCHD10,PNPT1,PUS1,FOXO3,TRMT61B
cytoplasmic translational initiation	14	16	11.1	0.006	8.53508e-05	EIF4A1,EIF3M,EIF4H,EIF4A2,RBM4,EIF2S2,EIF4B,EIF3B,EIF3G,EIF3J,EIF4G1,MCTS1,DENR,EIF5
protein-containing complex assembly	283	616	1.4	0.006	9.07816e-05	H2BU1,H2BC21,CELF2,H2BC12,ISG15,PRKCZ,CLEC7A,AP1AR,TGFB1,ATF1,RUVBL1,JAK2,WARS1,HDAC6,BIN2,FERMT3,PRKACA,DBNL,VASP,FER,LCP1,PTK2B,ARPC1B,RHOC,NAP1L1,CAPZA1,MAPRE3,HRG,ARHGAP6,SLC9A3R1,ARFIP2,MAPRE1,DARS1,VIL1,SRSF6,ARPC3,GRB2,RASA1,ATL3,MAPK3,PLEK,APCS,SYK,CD36,USP4,STUB1,IKBKG,HSPA1A,RBBP4,SRC,WAS,NCK2,CDH5,HES5,TMOD3,GMFG,H1-2,NEFL,PTPN11,SH3GL2,BDP1,ARFIP1,HOPX,ZC3H12A,C9,MAPK9,SPAST,TBCE,EIF3…
endosome organization	25	35	4	0.006	9.10044e-05	CHMP1A,RAB7A,RAB11A,DNM1,CHMP2B,HGS,SCARB2,CHMP1B,SNF8,TSG101,RAB22A,USP8,IST1,VTA1,VPS4A,CHMP2A,VPS28,STX6,VPS4B,VPS25,CHMP6,PIK3C3,PDCD6IP,RILP,CHMP4A
vacuolar transport	35	54	2.9	0.006	9.40792e-05	CHMP1A,RAB7A,CHMP2B,HGS,SCARB2,CHMP1B,SMURF1,VPS53,AP1G2,SNF8,HSPA1A,TSG101,NAGPA,VCP,GGA3,EHD3,VTA1,VPS4A,CHMP2A,VPS28,VPS4B,VPS25,VTI1B,PCSK9,HSPA1B,ARF1,CHMP6,HSPA8,GRN,SNX27,RILP,VTI1A,RNF215,STX8,LRP1,CHMP4A
positive regulation of cellular protein localization	76	139	1.9	0.006	9.44137e-05	TGFB1,PTN,JAK2,ROCK2,RAB11A,FLNA,MAPK8,VIL1,GSK3A,RAC2,PDPK1,SRC,ERBB2,TSG101,RER1,PTGS2,AKT1,ZC3H12A,AKT2,GSK3B,PRKAA2,PPP1R9B,FYN,STAC,SMAD3,MESD,CIB1,NMT1,STX4,RNF31,NKD2,BICD1,CCT5,GNAI1,MAPK1,NPTN,CCT7,UBE2D3,SHH,CCT8,FIS1,MGAT3,VPS28,DDRGK1,UBL5,EGF,RAN,CSNK2A2,F2,GZMB,TREM2,CD2AP,MIEF1,ABLIM3,GPD1L,DPP10,TCP1,MSN,CACNB3,MAPK14,WNK3,YAP1,EZR,AP2B1,CNPY4,HTRA2,CD81,PRKCI,PARK7,HCLS1,RACK1,RD…
regulation of cellular protein catabolic process	69	124	2	0.006	9.53754e-05	PRKACA,PTK2B,CDK2,DAB2,OPHN1,SMURF1,GSK3A,STUB1,HSPA1A,AKT1,FURIN,MAPK9,SIRT2,TNFAIP3,GPX1,UBE2K,GSK3B,CEBPA,GIPC1,HAMP,VCP,NKD2,UCHL5,NUDT15,EPHA4,PDCL3,CSNK2A1,SHH,PML,MGAT3,DDRGK1,NUB1,ARAF,GABARAP,PSMC5,PCSK9,HSPA1B,SGTA,RAD23B,EGF,CSNK2A2,PTEN,CAMLG,BAG6,TREM2,UBE2V2,UBB,GABARAPL2,USP14,STYX,UBE3A,FHIT,FMR1,MSN,PSMC3,ATP5IF1,ALAD,PSME2,EZR,ANXA2,CD81,PARK7,RACK1,UBQLN4,RDX,RPL5,EFNA1,LRP1,CO…
regulation of early endosome to late endosome transport	12	13	19	0.006	9.69943e-05	RAB21,DAB2,MAPK3,SNX12,SRC,DENND10,MAPK1,MAP2K1,MSN,EZR,MAP2K2,RDX
negative regulation of cellular process	856	2031	1.2	0.006	9.82494e-05	ISG15,SFRP5,PRKCZ,AP1AR,TGFB1,NPPA,ADAMDEC1,LST1,EFNB3,VIM,SOD1,ADCYAP1,MDK,CSF1,ARHGDIA,AHSG,MPO,TNFRSF8,None,PTN,BMP10,KNG1,MICAL1,CHMP1A,CLEC4G,RGS5,PRDX4,JAK2,WARS1,KEL,MAP2K4,HDAC6,ZNF10,COMP,LTA,PLG,WFIKKN1,SPINT1,EDN1,ROCK2,SNTA1,SVBP,PRKACA,PGLYRP2,ILK,RAB7A,ITGAV,SFRP1,PPIF,CSK,PLXNA4,GPNMB,LRRC15,NTRK2,CRIM1,TGFB3,PRKCA,FER,VSIG4,DCC,SNX5,ID2,DNM1,KIT,CTDSP1,ZWINT,PTK2B,UBASH3B,STK24,IP…
viral genome replication	39	62	2.7	0.006	0.000100811	ISG15,MX1,ROCK2,PCBP1,OAS1,IFNB1,ILF3,BCL2,RAB5A,VAPA,GRK2,ZC3H12A,TBC1D20,IFI16,CD209,VCP,HMGA2,SRPK1,CDC42,PPIH,PPIA,KPNA6,CD28,CCL5,PPID,PPIE,HSPA8,SLPI,PCBP2,APOBEC3G,FMR1,PPARA,CCL8,CTBP1,ATG5,IFNL3,PPIB,SRPK2,PKN2
actin polymerization or depolymerization	59	103	2.1	0.006	0.000101984	AP1AR,MICAL1,JAK2,DBNL,VASP,FER,PTK2B,DSTN,ARPC1B,CAPZA1,ARHGAP6,ARFIP2,VIL1,ARPC3,NAA80,GRB2,RASA1,PLEK,ENAH,WAS,NCK2,TMOD3,GMFG,ARFIP1,GMFB,PYCARD,PFN1,PPP1R9B,PICK1,PIK3CA,DMTN,ARPC2,FLII,SPATC1L,RAC1,AIF1,ARPC5,RHOA,TWF2,HAX1,GSN,ADD2,TMOD2,CCL26,BAG4,TWF1,EVL,ARF1,TMOD1,CAPG,CATIP,GHRL,PDXP,ESAM,SLIT2,HCLS1,RDX,DIAPH1,CSF3
fatty acid beta-oxidation	26	37	3.8	0.006	0.000102364	IVD,CRAT,ACOX1,HADH,AKT1,SLC27A2,DECR1,AKT2,SCP2,CROT,HSD17B4,ACADM,ACADVL,ECHS1,ACOT8,HSD17B10,ECI2,DECR2,ECH1,PPARA,GCDH,ADIPOQ,ECHDC1,ACAT1,ECI1,LEP
regulation of anatomical structure size	117	230	1.7	0.006	0.000106976	AP1AR,NPPA,SOD1,ADCYAP1,KNG1,KEL,COMP,EDN1,ROCK2,SNTA1,ILK,DBNL,PLXNA4,VASP,FER,RAB11A,DCC,PTK2B,DSTN,ARPC1B,RAB21,AKT3,CAPZA1,SEMA3B,SLC9A3R1,L1CAM,ARFIP2,VIL1,ARPC3,NAA80,GRB2,RASA1,PLEK,RAB5A,WAS,NCK2,AGT,TMOD3,GMFG,CRABP2,NTN1,GJA1,NEFL,RAB22A,PTGS2,AKT1,ARFIP1,DNM2,SEMA4G,GPX1,GMFB,GSK3B,VAV1,PYCARD,PFN1,PICK1,PIK3CA,ISLR2,DMTN,BDNF,ARPC2,EIF4G2,AKT1S1,SEMA6D,FLII,IST1,RAC1,ARPC5,RHOA,TWF2,C…
positive regulation of cell development	85	159	1.8	0.006	0.000108153	CLEC7A,TGFB1,MDK,PTN,LTA,SPINT1,ILK,DBNL,PLXNA4,NTRK2,RAB11A,ID2,OLFM4,KIT,RAB21,LYN,NAP1L1,SERPINE2,FLNA,PPP1CC,L1CAM,BMP2,BCL2,ROBO2,CTNNB1,CDH5,CASS4,PLXNA1,CRABP2,NTN1,NEFL,PLXNC1,MPL,DNM2,SIRT2,F11R,BMP4,ISLR2,NUMB,UNC13D,DMTN,BDNF,ARPC2,EIF4G2,CIB1,IST1,APOA1,RAC1,TGM2,NPTN,EPHA4,TWF2,BAD,CDH4,SHH,ABL1,CDC42,VEGFA,MYOC,ROBO1,SKIL,CAMK2B,PTPRD,CRK,ETV5,CRKL,IL1B,HES1,FAIM,MAP2K1,NDEL1,TNFRSF…
wound healing	131	262	1.6	0.007	0.000115907	CLEC7A,TGFB1,KNG1,JAK2,EVPL,SAA1,COMP,FERMT3,PLG,EDN1,ITGA2B,ILK,TGFB3,PRKCA,UBASH3B,RHOC,CSRP1,LYN,MYL9,MMP12,HRG,SERPINE2,FLNA,SYTL4,MYL12A,ITGA5,MPIG6B,VIL1,SRSF6,PLEK,APCS,SYK,CD36,FAP,PAFAH2,SRC,WAS,ERBB2,SERPING1,CASP3,GJA1,DCN,CLIC1,TEC,MPL,PTPN6,F11R,HPSE,TNFAIP3,GPX1,MCAM,HSPB1,POSTN,METAP1,VAV1,FIBP,PIK3CA,SMAD2,SMAD3,PEAR1,B4GALT1,DMTN,FUT10,ALOX5,PPP3CA,RAB3A,PLCG2,C1QTNF1,BLOC1S3,TIM…
regulation of biological quality	672	1571	1.2	0.007	0.000116073	NADK,ISG15,PRKCZ,AP1AR,TGFB1,NPPA,LST1,VIM,SOD1,ADCYAP1,CSF1,ARHGDIA,None,FGFBP3,CTSG,PTN,HSD17B7,KNG1,PRDX4,JAK2,PLA2G10,KEL,HDAC6,NETO1,SAA1,COMP,FERMT3,PLG,EDN1,ROCK2,SNTA1,ITGA2B,PRKACA,ILK,RAB7A,KLHL3,ITGAV,SFRP1,PPIF,CSK,DBNL,PLXNA4,NTRK2,VASP,PRKCA,FER,RAB11A,DCC,SNX5,DTD1,ID2,KIT,PTK2B,UBASH3B,DSTN,RAB1A,ARPC1B,PAX8,RHOC,CSRP1,RAB21,LYN,CHMP2B,BTK,ADAM22,STAT6,MYL9,NRGN,AKT3,XCL1,PRKCB,CN…
cellular response to oxidative stress	88	166	1.8	0.007	0.000122145	SOD1,MPO,JAK2,HDAC6,PPIF,FER,STK24,BTK,STAT6,NME2,ARL6IP5,PENK,MAPK8,MGMT,MAPK3,BCL2,CD36,CTNNB1,HGF,HSPA1A,SRC,SPHK1,PTPN11,AKT1,ZC3H12A,MAPK9,SIRT2,ZNF580,TNFAIP3,GPX1,EIF2S1,HSPB1,PRKAA2,FYN,IMPACT,ALOX5,MCL1,PLA2R1,STX4,AIF1,MAPK1,NCOA7,ABL1,PAWR,RIPK1,PML,MGAT3,FBLN5,DHFR,ANKRD2,PRDX3,PPIA,DAPK1,HMOX1,HSF1,BMP7,NUDT2,DIABLO,HSPA1B,NONO,LANCL1,ERN1,GCH1,AIFM1,GPX7,PDK1,MMP9,TREM2,ETV5,SNCA,NF…
cytokinetic process	15	18	7.9	0.008	0.000142793	CHMP1A,ANXA11,CHMP2B,CHMP1B,MITD1,SPAST,VPS4A,RHOA,CHMP2A,VPS4B,ARF1,CHMP6,PDCD6IP,RACGAP1,CHMP4A
multivesicular body sorting pathway	15	18	7.9	0.008	0.000142793	CHMP1A,CHMP2B,SYTL4,CHMP1B,SNF8,DENND10,VCP,VTA1,CHMP2A,VPS28,VPS4B,VPS25,CHMP6,RILP,CHMP4A
cellular response to nitrogen compound	151	309	1.5	0.008	0.000150849	PRKCZ,VIM,SOD1,AHSG,JAK2,EDN1,ROCK2,PRKACA,SFRP1,CSK,NTRK2,FER,SNX5,LYN,STAT6,PRKCB,CDK2,RGS10,FLNA,SLC9A3R1,AGRN,INHBB,PENK,IFNB1,GRB2,INSR,MAPK3,GSK3A,CD36,CTNNB1,AHCYL1,PDPK1,GNAI3,SRC,RPS6KB1,AGT,CASP3,MARS1,GJA1,PTPN11,PTGS2,AKT1,GRK2,DNM2,SIRT2,IRF3,TNS2,PID1,PLCB1,YWHAG,AKT2,GSK3B,VWA2,PPP1R9B,FYN,IMPACT,PIK3CA,IGF1R,BCAR3,GOLPH3,DMTN,TMEM38B,PIP4K2B,PIP4K2A,ACHE,CCNA2,RAB13,SULT1A3,CTNNA1…
regulation of protein transport	126	252	1.6	0.009	0.000156062	NADK,PRKCZ,TGFB1,JAK2,SAA1,PRKACA,SFRP1,CSK,TGFB3,RAB11A,LCP1,ZFAND1,NUCB1,RAB11FIP3,FLNA,SYTL4,GOLPH3L,INHBB,MAPK8,GLUL,GSK3A,GRIPAP1,CD36,SNX12,RAC2,SRC,HADH,ERBB2,GJA1,TSG101,PTPN11,PTGS2,ARFIP1,ZC3H12A,AKT2,GSK3B,BMP4,FYN,PICK1,FKBP1B,SMAD3,GOLPH3,DMTN,ALOX5,PPP3CA,ENSA,C1QTNF3,ACHE,CIB1,NMT1,UFM1,STX4,RNF31,SAR1A,RAC1,MAPK1,UBE2D3,TGFB2,BAD,C2CD2L,OXCT1,SHH,HAX1,FIS1,VPS28,OSBP,CDC42,PPIA,SC…
regulation of molecular function	612	1425	1.3	0.009	0.000160943	MMP17,SFRP5,PRKCZ,CLEC7A,TCL1B,CD4,TNFSF10,TGFB1,NPPA,SOD1,CCNA1,ADCYAP1,PLA2G5,CSF1,ARHGDIA,AHSG,PTN,KNG1,MICAL1,EDA2R,FCGR1A,RGS5,MMP16,JAK2,PLA2G10,PON1,WARS1,HDAC6,NETO1,FGFR3,WFIKKN1,SPINT1,EDN1,ROCK2,SVBP,PRKACA,ILK,ITGAV,SFRP1,PPIF,CSK,DBNL,PLXNA4,NTRK2,CRIM1,FER,ID2,KIT,PTK2B,UBASH3B,TNXB,PRKAR2B,CEP43,RHOC,NUCB1,LYN,BTK,SERPINB3,XCL1,PRKCB,MAPRE3,ANTXR1,HRG,PIM1,HGS,OAS1,ARL6IP5,NEK7,DAB…
tRNA metabolic process	40	65	2.5	0.009	0.000165531	RPP25L,WARS1,WARS2,DTD1,HARS1,DARS1,NARS1,YARS1,MARS1,AARS1,QTRT2,DARS2,TRUB1,TARS1,URM1,VARS1,ELAC1,TSEN34,ADAT2,KARS1,TSEN15,TYW5,TRMT112,HSD17B10,DDX1,SARS2,ANKRD16,QTRT1,GARS1,CARS1,KTI12,DTD2,PUS1,EXOSC8,BCDIN3D,NSUN6,SARS1,RPP25,TRMT61B,METTL2B
early endosome to late endosome transport	19	25	5	0.009	0.000173581	RAB7A,RAB21,DAB2,FLNA,MAPK3,SNF8,SNX12,RAB5A,SRC,DENND10,MAPK1,PIK3C3,MAP2K1,MSN,RILP,EZR,MAP2K2,STX8,RDX
vesicle-mediated transport between endosomal compartments	19	25	5	0.009	0.000173581	RAB7A,RAB21,DAB2,FLNA,MAPK3,SNF8,SNX12,RAB5A,SRC,DENND10,MAPK1,PIK3C3,MAP2K1,MSN,RILP,EZR,MAP2K2,STX8,RDX
cell morphogenesis	223	478	1.4	0.009	0.000177033	PRKCZ,AP1AR,BSG,GFRA3,LST1,EFNB3,SOD1,MDK,ARHGDIA,SULT4A1,PTN,PLA2G10,KEL,HDAC6,FERMT3,ILK,ITGAV,DBNL,PLXNA4,NTRK2,VASP,FER,RAB11A,DCC,OLFM4,KIT,PTK2B,RAB1A,RHOC,RAB21,CNTN4,ANTXR1,RILPL1,SEMA3B,EPHA10,YWHAH,OPHN1,FLNA,SLC9A3R1,MYL12A,L1CAM,NECTIN1,SMURF1,MPIG6B,ATRN,VIL1,RASA1,GAP43,BCL2,ROBO2,CTNNB1,MYL12B,RAC2,HGF,LRRC4C,SRC,ENAH,CDH5,EPHA6,PACSIN2,CASS4,FGF8,ERBB2,CASP3,PLXNA1,CRABP2,NTN1,NRX…
regulation of reactive oxygen species metabolic process	53	92	2.2	0.01	0.000185839	CLEC7A,TGFB1,SOD1,HDAC6,PTK2B,ARF4,GRB2,BCL2,SYK,CD36,RAC2,GNAI3,AGT,AKT1,ZC3H12A,SIRT2,PID1,FYN,ALOX5,PLCG2,RAC1,STAT3,RHOA,FOXM1,RIPK1,FBLN5,DHFR,HSPD1,BMP7,CRP,BIRC2,SIRT3,GSTP1,GCH1,F2,CD177,SNCA,ACP5,G6PD,DHRS4,ARG2,PPARA,MAPK14,ATG5,FOXO3,PARK7,CFLAR,HK2,HP,MMP8,TLR4,LEP,ADGRB1
cytoskeleton organization	241	521	1.4	0.01	0.000187243	PRKCZ,AP1AR,VIM,SOD1,MDK,ARHGDIA,BMP10,MICAL1,PRC1,CHMP1A,JAK2,EVPL,HDAC6,CCL27,EDN1,ROCK2,ILK,SFRP1,DBNL,VASP,TGFB3,FER,RAB11A,FHOD1,LCP1,CALD1,PDLIM1,CSRP2,KIT,PTK2B,DSTN,TNXB,ARPC1B,CEP43,RHOC,CSRP1,CHMP2B,CAPZA1,MAPRE3,ANTXR1,HRG,CDK2,NEK7,KATNAL1,TNKS,ARHGAP6,OPHN1,FLNA,SLC9A3R1,AGRN,ARFIP2,CHMP1B,MAPRE1,VIL1,ARPC3,NAA80,GRB2,RASA1,MAPK3,NUBP1,BCL2,NCKIPSD,PLEK,CTNNB1,RAC2,PDPK1,HSPA1A,TRIP1…
response to interleukin-7	13	15	10.3	0.01	0.000193997	BTK,GIPC1,IL7R,HSPD1,PDIA3,YBX1,RAD23B,HDGF,CRKL,IL2RG,LSP1,STIP1,ATIC
cellular response to interleukin-7	13	15	10.3	0.01	0.000193997	BTK,GIPC1,IL7R,HSPD1,PDIA3,YBX1,RAD23B,HDGF,CRKL,IL2RG,LSP1,STIP1,ATIC
positive regulation of telomere maintenance via telomere lengthening	13	15	10.3	0.01	0.000193997	NEK7,TNKS,MAPK3,CTNNB1,CCT5,PNKP,MAPK1,CCT7,CCT8,PRKCQ,HNRNPA2B1,TCP1,MAPKAPK5
regulation of cellular catabolic process	166	345	1.5	0.01	0.000194311	VIM,SPTLC2,HDAC6,ROCK2,PRKACA,PRKCA,SNX5,PTK2B,CDK2,DAB2,KAT5,SCARB2,TBK1,OPHN1,ATP6V1C2,MAPK8,SMURF1,IL4,INSR,MAPK3,GSK3A,BCL2,MAGEA6,HGF,STUB1,IKBKG,HSPA1A,GNAI3,CASP3,DEPP1,CIRBP,IL10RA,DCN,GDNF,AKT1,FURIN,ZC3H12A,MAPK9,SIRT2,TNFAIP3,GPX1,KHSRP,CPTP,AKT2,UBE2K,GSK3B,HSPB1,PRKAA2,ABL2,MAPKAPK2,PYCARD,PIK3CA,ATP6V1C1,CEBPA,EIF4G2,MCL1,GIPC1,PIP4K2B,PIP4K2A,HAMP,IFI16,VCP,SAMD4B,APOA1,NKD2,ABHD5,…
tRNA aminoacylation for protein translation	16	20	6.3	0.01	0.000207929	WARS1,WARS2,HARS1,DARS1,NARS1,YARS1,MARS1,AARS1,DARS2,TARS1,VARS1,KARS1,SARS2,GARS1,CARS1,SARS1
amino acid activation	16	20	6.3	0.01	0.000207929	WARS1,WARS2,HARS1,DARS1,NARS1,YARS1,MARS1,AARS1,DARS2,TARS1,VARS1,KARS1,SARS2,GARS1,CARS1,SARS1
tRNA aminoacylation	16	20	6.3	0.01	0.000207929	WARS1,WARS2,HARS1,DARS1,NARS1,YARS1,MARS1,AARS1,DARS2,TARS1,VARS1,KARS1,SARS2,GARS1,CARS1,SARS1
negative regulation of protein localization to membrane	16	20	6.3	0.01	0.000207929	TGFB1,CSK,LRRC15,DAB2,PPP2R5A,MRAP,PID1,NUMB,GBP1,DMTN,LZTFL1,BCL2L1,PPFIA1,RHOQ,MRAP2,GDI1
regulation of hydrolase activity	260	567	1.4	0.01	0.000209594	PRKCZ,CLEC7A,TNFSF10,SOD1,ADCYAP1,PLA2G5,AHSG,KNG1,MICAL1,JAK2,FGFR3,WFIKKN1,SPINT1,ROCK2,SVBP,SFRP1,PPIF,PLXNA4,NTRK2,CRIM1,KIT,PTK2B,RHOC,LYN,SERPINB3,XCL1,ANTXR1,HRG,OAS1,ARL6IP5,ANGPTL4,SCARB2,RGS10,SERPINE2,ARHGAP6,ECM1,AGRN,MAPK8,MGMT,VIL1,ARHGAP45,ARF4,BMP2,SERPINA3,RASA1,ITIH4,PLEK,APCS,SYK,HGF,PDPK1,CST7,HSPA1A,TANK,SRC,CRADD,ERBB2,SERPING1,OPRPN,TRAPPC6B,AGT,PLXNA1,ATP1B2,ARL6IP1,PLXNC1…
regulation of catalytic activity	500	1151	1.3	0.011	0.00022361	MMP17,PRKCZ,CLEC7A,TCL1B,CD4,TNFSF10,TGFB1,NPPA,SOD1,CCNA1,ADCYAP1,PLA2G5,CSF1,ARHGDIA,AHSG,PTN,KNG1,MICAL1,FCGR1A,RGS5,MMP16,JAK2,WARS1,HDAC6,FGFR3,WFIKKN1,SPINT1,EDN1,ROCK2,SVBP,ILK,SFRP1,PPIF,CSK,DBNL,PLXNA4,NTRK2,CRIM1,KIT,PTK2B,UBASH3B,TNXB,PRKAR2B,CEP43,RHOC,NUCB1,LYN,BTK,SERPINB3,XCL1,MAPRE3,ANTXR1,HRG,HGS,OAS1,ARL6IP5,NEK7,EPHA10,RABIF,ANGPTL4,SCARB2,RGS10,VAC14,TNKS,SERPINE2,CXCL10,ARHGA…
regulation of organelle organization	224	482	1.4	0.011	0.000227725	AP1AR,TNFSF10,MDK,PLA2G5,ARHGDIA,BMP10,CHMP1A,HDAC6,CCL27,EDN1,ROCK2,ILK,RAB7A,SFRP1,PPIF,DBNL,VASP,TGFB3,FER,FHOD1,LCP1,ANAPC7,ZWINT,PTK2B,DSTN,ARPC1B,RHOC,CHMP2B,CAPZA1,MAPRE3,HRG,NEK7,SCARB2,TNKS,ARHGAP6,FLNA,ARFIP2,CHMP1B,MAPK8,MAPRE1,VIL1,ARPC3,NAA80,GRB2,RASA1,INSR,ATL3,MAPK3,GAP43,NUBP1,GSK3A,PLEK,CTNNB1,RAC2,RAB5A,HGF,HSPA1A,SRC,WAS,NCK2,CDH5,SPHK1,FGF8,TMOD3,GMFG,NAA10,TSG101,ARL6IP1,CSF…
cell-substrate adhesion	104	204	1.7	0.011	0.000230017	PRKCZ,AP1AR,MDK,CSF1,None,PTN,JAK2,FERMT3,PLG,ROCK2,ITGA2B,ILK,ITGAV,SFRP1,FER,OLFM4,PTK2B,TNXB,RAB1A,MMP12,JAG1,ANTXR1,HRG,RRAS,THBS3,ARHGAP6,FLNA,L1CAM,ITGA5,ATRN,ITGA11,DEFB118,RASA1,NID2,BCL2,CD36,CTNNB1,RAC2,PDPK1,SRC,ZYX,CASS4,ATP1B2,PTPN11,DNM2,HPSE,NID1,ACTN1,GSK3B,POSTN,TIMM10B,VWA2,LGALS1,ADAM15,SMAD3,STK4,GBP1,UNC13D,DUSP3,COL13A1,DMTN,ARPC2,CIB1,APOA1,RAC1,RHOA,PPFIA1,ABL1,EPDR1,ACTN4…
proteolysis	393	889	1.3	0.011	0.000234173	ISG15,MMP17,CLEC7A,PSMA2,TNFSF10,TGFB1,ADAMDEC1,TMPRSS15,AHSG,CTSG,KNG1,MICAL1,CHMP1A,MMP16,CTSF,JAK2,KEL,HDAC6,COMP,PLG,WFIKKN1,SPINT1,ROCK2,SVBP,PRKACA,KLHL3,SFRP1,CRIM1,ADAM23,ANAPC7,ANAPC10,INPP5B,PTK2B,UBA7,LYN,ADAM22,METAP1D,SERPINB3,ADAM12,MMP12,ANTXR1,HRG,CDK2,ARL6IP5,NPLOC4,GZMH,DAB2,KAT5,TOLLIP,PSMA1,CLEC3B,SERPINE2,OPHN1,ECM1,ADAMTS1,SMURF1,MGMT,VIL1,XPNPEP1,SERPINA3,PGK1,GSK3A,ITIH4,D…
protein localization to cell periphery	86	164	1.8	0.011	0.000236906	PRKCZ,BSG,TGFB1,ROCK2,RAB7A,CSK,LRRC15,RAB11A,ADAM22,RILPL1,ARL6IP5,DAB2,FLNA,SLC9A3R1,MYL12A,GOLPH3L,SMURF1,VIL1,NUBP1,PPP2R5A,GRIPAP1,RAB3D,RAB3C,LDLRAP1,PDPK1,RER1,MRAP,AKT1,GGA1,SLMAP,F11R,PID1,AKT2,PPP1R9B,STAC,NUMB,GOLPH3,GBP1,RILPL2,LZTFL1,RAB3A,RABEP1,CIB1,RAB13,GGA3,STX4,EHD3,NKD2,ATP1B1,VPS4A,BCL2L1,ARL3,GNAI1,EHD1,RAB8B,PPFIA1,PACSIN1,DLG4,STX7,RHOQ,BAG4,VTI1B,MAPK10,MRAP2,TREM2,RAB31,…
regulation of actin filament polymerization	43	72	2.4	0.011	0.000249938	AP1AR,DBNL,VASP,FER,PTK2B,ARPC1B,CAPZA1,ARFIP2,VIL1,ARPC3,GRB2,RASA1,WAS,NCK2,TMOD3,GMFG,ARFIP1,GMFB,PYCARD,PFN1,PICK1,DMTN,ARPC2,FLII,ARPC5,RHOA,TWF2,HAX1,GSN,ADD2,TMOD2,CCL26,BAG4,TWF1,EVL,ARF1,TMOD1,CAPG,ESAM,SLIT2,HCLS1,RDX,CSF3
regulation of organelle assembly	43	72	2.4	0.011	0.000249938	CHMP1A,LCP1,CHMP2B,CHMP1B,GAP43,RAB5A,HSPA1A,SRC,TSG101,DNM2,MAPK9,PRKAA2,SMAD4,PIP4K2B,PIP4K2A,DRG1,RALB,RHOA,LRFN4,CHMP2A,GSN,VPS4B,CYLD,SCFD1,RAB1B,G3BP1,HSPA1B,ADPRH,CBLN1,CNOT1,PTPRD,KAT2A,PDCD6IP,IL1RAP,MSN,IL5,LRSAM1,ATG5,YAP1,EZR,GRID2,G3BP2,RDX,CHMP4A
positive regulation of axonogenesis	30	46	3	0.012	0.000252326	ILK,DBNL,PLXNA4,NTRK2,RAB11A,L1CAM,ROBO2,PLXNA1,CRABP2,NTN1,NEFL,PLXNC1,ISLR2,BDNF,EIF4G2,IST1,TWF2,CDH4,VEGFA,ROBO1,SKIL,MAP2K1,NDEL1,FN1,ZFYVE27,GDI1,SLIT2,SLITRK1,PLXNB2,LRP1
negative regulation of protein catabolic process	42	70	2.4	0.012	0.000255143	SERPINE2,OPHN1,FLNA,SNX12,TRIM40,FURIN,SIRT2,FYN,SMAD3,GIPC1,PIN1,UCHL5,TIMP1,EPHA4,PDCL3,CSNK2A1,SHH,PML,MGAT3,DDRGK1,SGTA,CSNK2A2,CAMLG,BAG6,SNCA,GABARAPL2,USP14,TIMP2,STYX,FHIT,RILP,ALAD,AGAP2,TIMP4,ANXA2,PARK7,CST3,CTSA,RPL5,EFNA1,ADGRB1,TIMP3
reactive oxygen species metabolic process	74	138	1.8	0.012	0.000262086	CLEC7A,TGFB1,SOD1,MPO,PRDX4,HDAC6,EDN1,PTK2B,ARF4,GRB2,BCL2,SYK,CD36,RAC2,ACOX1,GNAI3,AGT,AKT1,ZC3H12A,SIRT2,GPX1,PID1,VAV1,FYN,CAT,TPO,ALOX5,PLA2R1,PLCG2,RAC1,STAT3,RHOA,FOXM1,RIPK1,CYB5R4,CCN1,FBLN5,DHFR,HSPD1,PRDX3,BMP7,CRP,BIRC2,SIRT3,PRG3,GSTP1,GCH1,F2,LPO,CD177,SNCA,ACP5,G6PD,DHRS4,ARG2,IMMP2L,PPARA,SH3PXD2B,SFTPD,MAPK14,ATG5,FOXO3,ATP5IF1,PRDX6,PARK7,NCF1,CFLAR,APOA4,HK2,HP,MMP8,TLR4,LEP,A…
endosomal transport	53	93	2.1	0.012	0.000270785	CHMP1A,RAB7A,RAB11A,SNX5,CHMP2B,INPP5F,HGS,RAB11FIP3,CHMP1B,RAB6B,VPS53,SNX4,GRIPAP1,SNF8,SNX12,WAS,SNX8,ARFIP1,GGA1,TINAGL1,ERC1,DENND10,MICALL1,BLOC1S1,VCP,RAB13,GGA3,EHD3,VTA1,VPS4A,EHD1,SNX1,CHMP2A,VPS28,STX6,VPS4B,RAB6A,VPS25,RAB11B,TBC1D5,VTI1B,RAB14,STX10,CHMP6,VPS26A,ARHGAP1,DPY30,SNX27,EPS15L1,RILP,VTI1A,AGAP2,CHMP4A
negative regulation of biological process	918	2200	1.2	0.012	0.000271796	ISG15,SFRP5,PRKCZ,AP1AR,TGFB1,NPPA,ADAMDEC1,LST1,MX1,EFNB3,VIM,SOD1,ADCYAP1,MDK,CSF1,ARHGDIA,AHSG,MPO,TNFRSF8,None,PTN,BMP10,KNG1,MICAL1,CHMP1A,CLEC4G,RGS5,PRDX4,JAK2,PLA2G10,WARS1,KEL,MAP2K4,HDAC6,SAA1,ZNF10,COMP,FGFR3,LTA,PLG,WFIKKN1,SPINT1,EDN1,ROCK2,SNTA1,SVBP,PRKACA,THBS4,PGLYRP2,ILK,RAB7A,ITGAV,SFRP1,PPIF,CSK,PLXNA4,GPNMB,LRRC15,NTRK2,CRIM1,TGFB3,PRKCA,FER,VSIG4,DCC,SNX5,ID2,DNM1,RSPO2,KIT,…
positive regulation of establishment of protein localization	87	167	1.7	0.013	0.000291945	NADK,PRKCZ,TGFB1,JAK2,PRKACA,TGFB3,ZFAND1,FLNA,SYTL4,GOLPH3L,MAPK8,GLUL,GSK3A,RAC2,SRC,ERBB2,GJA1,TSG101,PTGS2,ZC3H12A,AKT2,GSK3B,FYN,SMAD3,GOLPH3,C1QTNF3,ACHE,CIB1,NMT1,STX4,RNF31,SAR1A,RAC1,CCT5,MAPK1,CCT7,UBE2D3,TGFB2,BAD,C2CD2L,OXCT1,SHH,CCT8,PTP4A3,FIS1,VPS28,OSBP,CDC42,PPIA,UBL5,NR0B2,RAN,CSNK2A2,PPID,SIRT3,ARF1,GZMB,TREM2,CD2AP,MIEF1,ABLIM3,IL1B,TCP1,VSNL1,GHRL,ADAM9,GLUD1,CACNB3,MAPK14,TT…
regulation of peptidase activity	143	294	1.5	0.013	0.000294296	CLEC7A,TNFSF10,AHSG,KNG1,MICAL1,JAK2,WFIKKN1,SPINT1,ROCK2,SVBP,CRIM1,LYN,SERPINB3,ANTXR1,HRG,ARL6IP5,SERPINE2,ECM1,MGMT,VIL1,SERPINA3,ITIH4,SYK,HGF,CST7,TANK,SRC,CRADD,SERPING1,OPRPN,AGT,ARL6IP1,PTGS2,AKT1,FURIN,CDKN2D,GPX1,CR1,PYCARD,FYN,ITIH1,SMAD3,SERPINB13,ITIH2,RPS6KA3,ARRB1,IFI16,VCP,ANOS1,ITIH5,STAT3,UCHL5,TIMP1,RHOA,EPHA4,CD109,BAD,CSNK2A1,APAF1,TFPI,C5,GSN,VSIR,FIS1,PML,CCN1,PAPLN,LGMN,H…
positive regulation of transport	216	465	1.4	0.013	0.000305701	NADK,PRKCZ,CLEC7A,TGFB1,NPPA,SOD1,ADCYAP1,PLA2G5,AHSG,JAK2,PLA2G10,PON1,EDN1,PRKACA,RAB7A,TGFB3,SNX5,ZFAND1,DNM1,RAB21,XCL1,IL15RA,HGS,DAB2,CXCL10,FLNA,SLC9A3R1,SYTL4,CNTN1,GOLPH3L,INHBB,MAPK8,GLUL,IL4,BMP2,INSR,GSK3A,SNX4,RAB3D,SYK,CD36,AHCYL1,SNF8,LDLRAP1,RAC2,RAB5A,PDPK1,SRC,STIM1,ERBB2,AGT,CBL,MAP2K6,ATP1B2,GJA1,TSG101,ARL6IP1,PTPN11,GDNF,PTGS2,AKT1,GRK2,ZC3H12A,DNM2,HOMER1,AKT2,GSK3B,CETP,PY…
negative regulation of protein localization to cell periphery	14	17	7.4	0.013	0.000309795	TGFB1,CSK,LRRC15,DAB2,PPP2R5A,MRAP,PID1,NUMB,GBP1,LZTFL1,BCL2L1,PPFIA1,RHOQ,MRAP2
regulation of actin polymerization or depolymerization	48	83	2.2	0.014	0.000326286	AP1AR,DBNL,VASP,FER,PTK2B,DSTN,ARPC1B,CAPZA1,ARFIP2,VIL1,ARPC3,NAA80,GRB2,RASA1,PLEK,WAS,NCK2,TMOD3,GMFG,ARFIP1,GMFB,PYCARD,PFN1,PICK1,PIK3CA,DMTN,ARPC2,FLII,ARPC5,RHOA,TWF2,HAX1,GSN,ADD2,TMOD2,CCL26,BAG4,TWF1,EVL,ARF1,TMOD1,CAPG,PDXP,ESAM,SLIT2,HCLS1,RDX,CSF3
regulation of actin filament length	48	83	2.2	0.014	0.000326286	AP1AR,DBNL,VASP,FER,PTK2B,DSTN,ARPC1B,CAPZA1,ARFIP2,VIL1,ARPC3,NAA80,GRB2,RASA1,PLEK,WAS,NCK2,TMOD3,GMFG,ARFIP1,GMFB,PYCARD,PFN1,PICK1,PIK3CA,DMTN,ARPC2,FLII,ARPC5,RHOA,TWF2,HAX1,GSN,ADD2,TMOD2,CCL26,BAG4,TWF1,EVL,ARF1,TMOD1,CAPG,PDXP,ESAM,SLIT2,HCLS1,RDX,CSF3
actin cytoskeleton organization	154	320	1.5	0.014	0.00032678	AP1AR,MDK,ARHGDIA,BMP10,MICAL1,JAK2,CCL27,EDN1,ROCK2,ILK,SFRP1,DBNL,VASP,TGFB3,FER,FHOD1,LCP1,CALD1,PDLIM1,CSRP2,KIT,PTK2B,DSTN,TNXB,ARPC1B,RHOC,CSRP1,CAPZA1,ANTXR1,HRG,ARHGAP6,OPHN1,FLNA,SLC9A3R1,ARFIP2,VIL1,ARPC3,NAA80,GRB2,RASA1,BCL2,PLEK,RAC2,PDPK1,TRIP10,SRC,ENAH,WAS,NCK2,PACSIN2,ZYX,CASS4,TMOD3,GMFG,CSF1R,ARFIP1,TPM4,CDC42BPB,F11R,ACTN1,GMFB,ABL2,PYCARD,PFN1,ARHGAP26,PPP1R9B,PICK1,PIK3CA,PD…
positive regulation of signal transduction	340	763	1.3	0.014	0.000327609	PRKCZ,CLEC7A,CD4,TNFSF10,TGFB1,NPPA,SOD1,RUVBL1,ADCYAP1,PLA2G5,CSF1,ZBP1,None,FGFBP3,BMP10,EDA2R,JAK2,NETO1,FGFR3,EDN1,ROCK2,ILK,ITGAV,SFRP1,CSK,GPNMB,NTRK2,TGFB3,PRKCA,SNX5,RSPO2,KIT,PTK2B,RHOC,LYN,AKT3,XCL1,PRKCB,MMP12,JAG1,ARL6IP5,IFNL1,DAB2,TBK1,TNKS,FLNA,FGFBP1,ECM1,SLC9A3R1,ATP6V1C2,INHBB,ITGA5,CSNK1G1,IFNB1,IL4,BMP2,INSR,PAGR1,MAPK3,GSK3A,ROBO2,SYK,CD36,CTNNB1,HGF,VAPA,IKBKG,HSPA1A,KLB,SRC…
actin filament-based process	165	346	1.5	0.015	0.000352054	AP1AR,MDK,ARHGDIA,BMP10,MICAL1,JAK2,CCL27,EDN1,ROCK2,SNTA1,ILK,SFRP1,DBNL,VASP,TGFB3,FER,FHOD1,LCP1,CALD1,PDLIM1,CSRP2,KIT,PTK2B,DSTN,TNXB,ARPC1B,RHOC,CSRP1,CAPZA1,ANTXR1,HRG,ARHGAP6,OPHN1,FLNA,SLC9A3R1,ARFIP2,VIL1,ARPC3,NAA80,GRB2,RASA1,BCL2,PLEK,RAC2,PDPK1,TRIP10,SRC,ENAH,WAS,NCK2,PACSIN2,ZYX,CASS4,TMOD3,GMFG,GJA1,CSF1R,ARFIP1,TPM4,CDC42BPB,F11R,ACTN1,GMFB,ABL2,PYCARD,PFN1,ARHGAP26,PPP1R9B,PICK…
cellular response to chemical stimulus	643	1511	1.2	0.015	0.000360196	NADK,ISG15,SFRP5,IL22RA1,PRKCZ,CLEC7A,BSG,CD4,TGFB1,MX1,VIM,SOD1,H2AZ1,ADCYAP1,MDK,CSF1,ARHGDIA,AHSG,MPO,ZBP1,None,FGFBP3,CTSG,PTN,BMP10,EDA2R,GALNT3,PRDX4,JAK2,MAP2K4,HDAC6,SAA1,CCL27,COMP,BIN2,CES3,FGFR3,WFIKKN1,FGF22,SPINT1,EDN1,ROCK2,PRKACA,THBS4,IL12RB1,ILK,SFRP1,PPIF,CSK,PLXNA4,NTRK2,CRIM1,TGFB3,PRKCA,FER,SNX5,ZFAND1,ADAM23,KIT,PTK2B,STK24,IP6K2,PAX8,LYN,BTK,STAT6,XCL1,PRKCB,IL15RA,FGF3,MMP…
extrinsic apoptotic signaling pathway	73	137	1.8	0.015	0.000370159	TNFSF10,TGFB1,JAK2,FGFR3,ITGAV,SFRP1,IL4,GSK3A,BCL2,HGF,PDPK1,HSPA1A,SRC,CRADD,AGT,GDNF,AKT1,TNFAIP3,GPX1,GSK3B,BMP4,TNFRSF10B,PYCARD,FYN,SMAD3,STK4,MCL1,CIB1,STX4,TRADD,CTNNA1,FGFR1,BCL2L1,TGFB2,BAD,SPI1,RIPK1,PML,CYLD,MAP2K5,CD27,TRAF1,PDIA3,KITLG,RAF1,HMOX1,GABARAP,DIABLO,HSPA1B,SKIL,GSTP1,PTEN,DAPK3,IL1B,TNFRSF10A,FAIM,BMP5,TNFRSF1B,BID,RFFL,FOXO3,UNC5B,STK3,YAP1,COL2A1,LTBR,HTRA2,PARK7,CFLAR…
fatty acid metabolic process	78	148	1.8	0.015	0.000371768	PLA2G5,PLA2G10,ABHD12,EDN1,HPGDS,TNXB,PRKAR2B,IVD,TYRP1,CRYL1,MAPK3,CD36,CRAT,ACOX1,ZADH2,HADH,PTGS2,AKT1,SLC27A2,THEM4,DECR1,GPX1,AKT2,PRKAA2,ACSF2,SCP2,ACADSB,ADH5,CROT,HSD17B4,ALOX5,ACADM,APOA1,ABHD5,ACSS2,LIPG,ACADVL,ALOX15B,LPL,MCEE,PLA2G4A,ECHS1,ACOT8,PTGES3,AKR1B1,GSTM4,HSD17B10,ACOT12,MIF,OXSM,PTGES2,GSTP1,ECI2,DECR2,PDK1,SNCA,IL1B,PTGR1,FASN,LPIN1,ECH1,PPARA,MAPK14,GCDH,FABP3,ADIPOQ,ECHD…
protein-containing complex disassembly	53	94	2.1	0.016	0.000389168	H2AW,C12orf65,MICAL1,CHMP1A,HDAC6,ZFAND1,DSTN,CHMP2B,CAPZA1,CHMP1B,VIL1,KLC1,INSR,PLEK,TMOD3,TSG101,SPAST,GSK3B,PPP1R9B,GSPT2,PIK3CA,IGF1R,MAP1LC3B,DMTN,CIB1,FLII,VCP,IST1,VTA1,VPS4A,EIF5A,TWF2,CHMP2A,GSN,ADD2,VPS4B,TMOD2,SNAP29,TBC1D25,DHX8,PEX14,TWF1,HSPA8,TMOD1,STX17,CAPG,EIF5A2,HDGFL3,PDXP,MAP1LC3A,NAPA,UBQLN4,RDX
regulation of vesicle-mediated transport	144	298	1.5	0.016	0.000405539	CLEC7A,NPPA,SOD1,PLA2G5,AHSG,MICAL1,RAB7A,ITGAV,CSK,FER,RAB11A,DNM1,RAB21,LYN,PRKCB,INPP5F,IL15RA,HGS,DAB2,RAB5C,OPHN1,SYTL4,IL4,SMAP1,INSR,MAPK3,SNX4,RAB5B,GRIPAP1,RAB3D,SYK,CD36,RAB3C,SNF8,LDLRAP1,SNX12,RAC2,RAB5A,CD22,PDPK1,SRC,PACSIN2,SPHK1,CBL,RAB4B,TSG101,SH3GL2,ARFIP1,DNM2,AKT2,GSK3B,ABL2,PYCARD,SFRP4,PICK1,DENND10,NUMB,PRTN3,SH3GL3,UNC13D,SYT17,SEPTIN1,PPP3CA,GIPC1,ARRB1,TBC1D20,RAB3A,PLC…
regulation of extrinsic apoptotic signaling pathway	52	92	2.1	0.016	0.000406073	TNFSF10,ITGAV,SFRP1,IL4,BCL2,HGF,HSPA1A,SRC,AGT,GDNF,AKT1,TNFAIP3,GPX1,GSK3B,BMP4,PYCARD,FYN,STK4,MCL1,STX4,CTNNA1,FGFR1,BCL2L1,RIPK1,PML,CYLD,MAP2K5,TRAF1,PDIA3,RAF1,HMOX1,HSPA1B,SKIL,GSTP1,PTEN,DAPK3,IL1B,FAIM,BMP5,BID,RFFL,UNC5B,STK3,YAP1,COL2A1,LTBR,HTRA2,PARK7,CFLAR,SERPINE1,INHBA,TIMP3,GCLM
ribonucleoside triphosphate metabolic process	28	43	3	0.017	0.000420709	TGFB1,NME2,IL4,GNAI3,PID1,ATP5PO,NME4,VCP,NME7,STAT3,RHOA,UCK1,CTPS1,PKLR,ENO1,RHOQ,ATP5F1B,NUDT2,ATP5PF,RAN,TREM2,PPARA,RAB23,ITPA,NME1,IMPDH1,VPS9D1,ALDOA
regulation of proteolysis involved in cellular protein catabolic process	58	105	2	0.017	0.00043632	PRKACA,PTK2B,CDK2,DAB2,OPHN1,SMURF1,GSK3A,STUB1,HSPA1A,AKT1,MAPK9,SIRT2,GPX1,UBE2K,GSK3B,CEBPA,GIPC1,VCP,NKD2,UCHL5,NUDT15,EPHA4,PDCL3,CSNK2A1,SHH,PML,DDRGK1,NUB1,ARAF,GABARAP,PSMC5,HSPA1B,SGTA,RAD23B,EGF,CSNK2A2,PTEN,CAMLG,BAG6,TREM2,UBE2V2,UBB,GABARAPL2,USP14,STYX,UBE3A,FHIT,FMR1,PSMC3,ATP5IF1,ALAD,PSME2,PARK7,RACK1,UBQLN4,RPL5,EFNA1,COMMD1,BCAP31
positive regulation of telomere maintenance via telomerase	12	14	9.5	0.017	0.000437026	NEK7,TNKS,MAPK3,CTNNB1,CCT5,PNKP,MAPK1,CCT7,CCT8,PRKCQ,TCP1,MAPKAPK5
response to axon injury	35	57	2.5	0.017	0.00044575	SOD1,PTN,JAK2,STK24,LYN,INPP5F,FLNA,ARF4,GAP43,BCL2,NEFL,FKBP1B,LGALS1,RTN4RL1,KLK8,PLCG2,CTNNA1,APOA1,AIF1,CHL1,EPHA4,DHFR,MAX,APOD,PTEN,TREM2,GRN,TNC,DPYSL3,RTN4R,MAP2K1,NDEL1,SPP1,GIP,LRP1
translational initiation	34	55	2.6	0.017	0.000448631	EIF4E,EIF4A1,NCK2,RPS6KB1,EIF2B1,EIF3M,EIF2S1,HSPB1,EIF4H,IMPACT,EIF4A2,RBM4,EIF4G2,EIF1AY,EIF2A,EIF2S2,MTIF3,EIF4B,EIF3B,EIF3G,COPS5,DDX1,CCL5,EIF3J,EIF4G1,LTO1,EIF1B,EIF1,FMR1,MCTS1,DENR,EIF1AD,EIF5,AGO2
actin filament polymerization	49	86	2.1	0.018	0.000459293	AP1AR,JAK2,DBNL,VASP,FER,PTK2B,ARPC1B,CAPZA1,ARHGAP6,ARFIP2,VIL1,ARPC3,GRB2,RASA1,WAS,NCK2,TMOD3,GMFG,ARFIP1,GMFB,PYCARD,PFN1,PICK1,DMTN,ARPC2,FLII,RAC1,AIF1,ARPC5,RHOA,TWF2,HAX1,GSN,ADD2,TMOD2,CCL26,BAG4,TWF1,EVL,ARF1,TMOD1,CAPG,CATIP,ESAM,SLIT2,HCLS1,RDX,DIAPH1,CSF3
reactive oxygen species biosynthetic process	20	28	4	0.018	0.00047088	SOD1,MPO,CD36,ACOX1,FYN,ALOX5,PLCG2,STAT3,RHOA,HSPD1,SNCA,ARG2,PPARA,FOXO3,PARK7,NCF1,CFLAR,MMP8,TLR4,ADGRB1
supramolecular fiber organization	159	334	1.5	0.019	0.0004979	AP1AR,VIM,BMP10,MICAL1,COL11A2,JAK2,HDAC6,COMP,EDN1,ROCK2,ILK,SFRP1,DBNL,LUM,VASP,TGFB3,FER,RAB11A,FHOD1,LCP1,CALD1,PDLIM1,CSRP2,PTK2B,DSTN,TNXB,ARPC1B,RHOC,CSRP1,CAPZA1,MAPRE3,ARHGAP6,FLNA,ARFIP2,MAPRE1,VIL1,ARPC3,NAA80,GRB2,RASA1,BCL2,PLEK,CD36,RAC2,TLL1,HSPA1A,SRC,ENAH,WAS,NCK2,CDH5,ZYX,CASS4,TMOD3,GMFG,NEFL,ARFIP1,FURIN,TPM4,SPAST,F11R,COLGALT2,ACTN1,GPX1,GMFB,PYCARD,PFN1,PPP1R9B,KPNB1,PICK1,…
response to cytokine	241	528	1.4	0.019	0.000508488	ISG15,IL22RA1,CD4,MX1,VIM,CSF1,ZBP1,CTSG,EDA2R,JAK2,EDN1,PRKACA,IL12RB1,ILK,SFRP1,PRKCA,FER,ADAM23,KIT,PTK2B,BTK,STAT6,XCL1,IL15RA,MMP12,OAS1,TOLLIP,IL22RA2,TBK1,CXCL10,SRSF7,ECM1,IFNB1,MAPK3,GSK3A,ITIH4,BCL2,SYK,LDLRAP1,IFNW1,HSPA1A,TANK,SRC,WAS,ZYX,SPHK1,CBL,CASP3,GFPT2,IL10RA,CSF1R,CPNE1,PTPN11,IL1RL1,CXCL3,PTGS2,AKT1,IFNA4,CCL13,MPL,ZC3H12A,PTPN6,IL21R,IRF3,CCL22,TNFAIP3,CCL7,PID1,KHSRP,PLCB1…
ESCRT complex disassembly	8	8	Inf	0.019	0.000514972	CHMP1A,CHMP2B,CHMP1B,IST1,VTA1,VPS4A,CHMP2A,VPS4B
ESCRT III complex disassembly	8	8	Inf	0.019	0.000514972	CHMP1A,CHMP2B,CHMP1B,IST1,VTA1,VPS4A,CHMP2A,VPS4B
regulation of metallopeptidase activity	8	8	Inf	0.019	0.000514972	SVBP,ANTXR1,STAT3,TIMP1,DDRGK1,TIMP2,LRP1,TIMP3
establishment of protein localization to extracellular region	90	176	1.7	0.019	0.000523067	NADK,TGFB1,ADCYAP1,JAK2,SAA1,COMP,SVBP,SFRP1,TGFB3,PDIA4,CAVIN1,RAB11FIP3,SYTL4,GOLPH3L,INHBB,GLUL,SNCG,PLEK,RAB3D,RAB3C,HADH,GJA1,PTPN11,ARFIP1,PICK1,SMAD2,FKBP1B,NECAB3,GOLPH3,NAGPA,DMTN,AFM,ALOX5,PPP3CA,ENSA,C1QTNF3,ACHE,RAB3A,BLOC1S3,RAB13,STX4,RAC1,TGFB2,RAB8B,BAD,C2CD2L,OXCT1,CYB5R4,OSBP,UBE2Q1,PPIA,RAF1,OLFM2,RAB11B,STX1A,NR0B2,IL1RN,CBLN1,CCL5,PPID,SIRT3,ARF1,PIK3C3,NDUFAF2,TREM2,CD2AP,ER…
negative regulation of gene expression	198	426	1.4	0.019	0.000527192	TGFB1,VIM,CHMP1A,EDN1,ROCK2,PGLYRP2,SFRP1,CSK,GPNMB,TGFB3,PRKCA,VSIG4,ID2,BTK,XCL1,CDK2,OAS1,IFNL1,NPLOC4,KAT5,TBK1,SERPINE2,SRSF7,EIF4E,INHBB,SRSF6,IFNB1,IL4,BMP2,ILF3,CD36,DDX6,CTNNB1,SNX12,HGF,CD22,CST7,HSPA1A,CIRBP,CPNE1,IL1RL1,SH3GL2,GDNF,AKT1,THOC1,FURIN,ZC3H12A,PTPN6,SIRT2,TNFAIP3,KHSRP,CPTP,CR1,EIF2S1,BMP4,H3C1,PRKAA2,MAPKAPK2,PYCARD,GSPT2,FYN,SMAD2,SHMT2,SMAD3,ANXA7,GBP1,HOMER2,UFD1,RBM4…
organic acid metabolic process	200	431	1.4	0.02	0.000549004	PLA2G5,MPO,PLA2G10,PON1,WARS1,ABHD12,EDN1,ENO2,MDH2,WARS2,HPGDS,KIT,TNXB,PRKAR2B,IVD,CS,AHCY,TYRP1,HARS1,GLUL,DARS1,RBP1,MTHFS,CRYL1,GALK1,ME2,BPGM,NARS1,INSR,AASDHPPT,PGK1,MAPK3,SYK,CD36,CRAT,ACOX1,ZADH2,HADH,YARS1,MARS1,CRABP2,GFPT2,PTGS2,AKT1,AARS1,SLC27A2,THEM4,DECR1,GPX1,DARS2,AKT2,PRKAA2,ACSF2,MAPKAPK2,SCP2,ACADSB,SHMT2,ADH5,CROT,HSD17B4,BTD,ALOX5,TARS1,ACADM,IDH3G,ALDH6A1,SULT1A3,N6AMT1,AP…
actin filament organization	101	201	1.6	0.02	0.000550734	AP1AR,MICAL1,JAK2,ROCK2,SFRP1,DBNL,VASP,TGFB3,FER,FHOD1,LCP1,CALD1,PDLIM1,PTK2B,DSTN,ARPC1B,RHOC,CAPZA1,ARHGAP6,FLNA,ARFIP2,VIL1,ARPC3,NAA80,GRB2,RASA1,BCL2,PLEK,RAC2,SRC,ENAH,WAS,NCK2,ZYX,CASS4,TMOD3,GMFG,ARFIP1,TPM4,F11R,ACTN1,GMFB,PYCARD,PFN1,PPP1R9B,PICK1,PIK3CA,SMAD3,DMTN,ARHGAP25,ARPC2,ARRB1,FLII,SPATC1L,CTNNA1,APOA1,RAC1,AIF1,ARPC5,TNNT2,RHOA,TWF2,PPFIA1,PACSIN1,ABL1,PAWR,HAX1,GSN,ADD2,CDC…
late endosome to vacuole transport	10	11	15.8	0.02	0.000551298	CHMP1A,CHMP2B,CHMP1B,SNF8,VTA1,CHMP2A,VPS28,VPS25,CHMP6,CHMP4A
negative regulation of signaling	284	632	1.3	0.02	0.000561461	ISG15,SFRP5,PRKCZ,AP1AR,NPPA,MDK,AHSG,RGS5,WFIKKN1,EDN1,PRKACA,RAB7A,ITGAV,SFRP1,PPIF,CSK,CRIM1,TGFB3,SNX5,DNM1,PTK2B,UBASH3B,LYN,SERPINB3,PRKCB,INPP5F,MMP12,HRG,HGS,OAS1,NPLOC4,DAB2,RGS10,SERPINE2,RAB11FIP3,ECM1,SLC9A3R1,SYTL4,RGS18,INHBB,SMURF1,MPIG6B,IL4,BMP2,RASA1,GSK3A,BCL2,PLEK,CTNNB1,HGF,CD22,STUB1,PDPK1,HSPA1A,GNAI3,MINAR1,TANK,SRC,NCK2,RPS6KB1,HADH,UBE2D1,TRIM40,AGT,CBL,GJA1,TSG101,DCN,C…
response to chemical	818	1956	1.2	0.02	0.000561857	NADK,ISG15,SFRP5,IL22RA1,PRKCZ,CLEC7A,BSG,CD4,TNFSF10,TGFB1,GFRA3,NPPA,MX1,EFNB3,VIM,SOD1,H2AZ1,ATF1,ADCYAP1,MDK,CSF1,ARHGDIA,AHSG,MPO,ZBP1,None,FGFBP3,CTSG,PTN,BMP10,EDA2R,GALNT3,PRDX4,JAK2,PLA2G10,PON1,MAP2K4,HDAC6,SAA1,CCL27,COMP,BIN2,CES3,FGFR3,LTA,WFIKKN1,FGF22,SPINT1,EDN1,ROCK2,PRKACA,THBS4,IL12RB1,ILK,ITGAV,SFRP1,PPIF,CSK,PLXNA4,GPNMB,LUM,ANXA11,NTRK2,VASP,CRIM1,TGFB3,PRKCA,FER,DCC,SNX5,ZF…
protein phosphorylation	350	792	1.3	0.02	0.000563185	PRKCZ,CLEC7A,TCL1B,CD4,TGFB1,NPPA,SOD1,CCNA1,ADCYAP1,CSF1,CTSG,BMP10,MICAL1,FCGR1A,PRDX4,JAK2,WARS1,MAP2K4,HDAC6,FGFR3,FGF22,EDN1,ROCK2,PRKACA,THBS4,ILK,SFRP1,CSK,GPNMB,NTRK2,TGFB3,PRKCA,FER,KIT,CTDSP1,PTK2B,UBASH3B,STK24,TNXB,PRKAR2B,CEP43,VRK1,LYN,BTK,SERPINB3,AKT3,PRKCB,INPP5F,FGF3,MAPRE3,HRG,PIM1,NME2,HGS,CDK2,IFNL1,NEK7,DAB2,EPHA10,IL22RA2,TBK1,TNKS,SLC9A3R1,CNTN1,MATK,INHBB,CTDSPL,MAPK8,ITG…
cell projection organization	290	647	1.3	0.021	0.000598852	CRTAC1,PRKCZ,BSG,GFRA3,LST1,EFNB3,VIM,SOD1,ATF1,ADCYAP1,MDK,SULT4A1,PTN,JAK2,PLA2G10,KEL,HDAC6,SVBP,ILK,SFRP1,DBNL,PLXNA4,NTRK2,VASP,TGFB3,FER,RAB11A,DCC,KIT,PTK2B,STK24,CEP43,RAB21,LYN,CNTN4,INPP5F,HRG,NME2,RILPL1,SEMA3B,EPHA10,SCARB2,YWHAH,OPHN1,FLNA,SLC9A3R1,CNTN1,L1CAM,AGRN,NECTIN1,ARFIP2,SMURF1,MAPRE1,VIL1,ARF4,RTN4IP1,INSR,GAP43,NUBP1,GSK3A,BCL2,NCKIPSD,ROBO2,PLEK,CTNNB1,RAC2,RAB5A,HGF,VAPA…
cellular response to insulin stimulus	58	106	1.9	0.021	0.00060373	PRKCZ,AHSG,FER,SNX5,PRKCB,INHBB,GRB2,INSR,GSK3A,PDPK1,SRC,RPS6KB1,AGT,MARS1,PTPN11,AKT1,TNS2,PID1,YWHAG,AKT2,GSK3B,VWA2,PIK3CA,IGF1R,BCAR3,PIP4K2B,PIP4K2A,RAB13,APRT,GHR,RAB8B,GRB10,PKLR,LPL,PRKCQ,RHOQ,PKM,PCSK9,GSTP1,USO1,PTEN,SHC1,RAB31,IL1B,SYAP1,KL,CSRP3,LPIN1,SELENOS,NDEL1,GPT,GAB1,ADIPOQ,PRKCI,TRIM72,CFLAR,PLA2G1B,LEP
regulation of protein localization to membrane	58	106	1.9	0.021	0.00060373	PRKCZ,TGFB1,PTN,CSK,LRRC15,RAB11A,DAB2,MAPK8,VIL1,PPP2R5A,GRIPAP1,LDLRAP1,PDPK1,ERBB2,RER1,MRAP,AKT1,PID1,AKT2,PPP1R9B,FYN,STAC,NUMB,GBP1,DMTN,MESD,LZTFL1,CIB1,NMT1,STX4,NKD2,VPS4A,BCL2L1,PPFIA1,GSN,FIS1,STX7,RHOQ,VTI1B,MRAP2,GZMB,TREM2,CRIPT,MIEF1,CRKL,DPP10,CSRP3,CACNB3,WNK3,EZR,AP2B1,CNPY4,CD81,PRKCI,GDI1,RACK1,STX8,LRP1
regulation of endopeptidase activity	134	277	1.5	0.021	0.000604224	CLEC7A,TNFSF10,AHSG,KNG1,MICAL1,JAK2,WFIKKN1,SPINT1,ROCK2,CRIM1,LYN,SERPINB3,HRG,ARL6IP5,SERPINE2,MGMT,VIL1,SERPINA3,ITIH4,SYK,HGF,CST7,SRC,CRADD,SERPING1,OPRPN,AGT,ARL6IP1,PTGS2,AKT1,FURIN,CDKN2D,GPX1,CR1,PYCARD,FYN,ITIH1,SMAD3,SERPINB13,ITIH2,RPS6KA3,ARRB1,IFI16,VCP,ANOS1,ITIH5,STAT3,UCHL5,TIMP1,RHOA,EPHA4,CD109,BAD,CSNK2A1,APAF1,TFPI,C5,GSN,VSIR,FIS1,PML,CCN1,PAPLN,LGMN,HSPD1,VEGFA,PRDX3,DAPK1…
cytosolic transport	39	66	2.3	0.022	0.000646919	AP1AR,RAB7A,SNX5,RAB21,DAB2,FLNA,RAB6B,VPS53,MAPK3,SNF8,SNX12,RAB5A,SRC,SNX8,ARFIP1,GGA1,ERC1,DENND10,PIP4K2A,EHD3,MAPK1,SNX1,STX6,RAB6A,TBC1D5,VTI1B,RAB14,STX10,PIK3C3,VPS26A,MAP2K1,MSN,KIF1C,RILP,VTI1A,EZR,MAP2K2,STX8,RDX
negative regulation of protein localization to plasma membrane	13	16	6.9	0.023	0.000664798	TGFB1,CSK,LRRC15,DAB2,PPP2R5A,MRAP,PID1,NUMB,GBP1,BCL2L1,PPFIA1,RHOQ,MRAP2
regulation of cytoplasmic transport	13	16	6.9	0.023	0.000664798	RAB21,DAB2,MAPK3,SNX12,SRC,ARFIP1,DENND10,MAPK1,MAP2K1,MSN,EZR,MAP2K2,RDX
regulation of cellular component biogenesis	207	449	1.4	0.023	0.00067533	ISG15,PRKCZ,CLEC7A,AP1AR,TGFB1,CHMP1A,WARS1,HDAC6,ROCK2,PRKACA,RAB7A,SFRP1,DBNL,NTRK2,VASP,TGFB3,PRKCA,FER,FHOD1,LCP1,KIT,PTK2B,ARPC1B,RHOC,CHMP2B,CAPZA1,MAPRE3,ANTXR1,HRG,HGS,CLSTN3,CBLN2,ARHGAP6,FLNA,AGRN,NECTIN1,ARFIP2,CHMP1B,MAPRE1,VIL1,ARPC3,GRB2,RASA1,GAP43,ROBO2,PLEK,SYK,CD36,SNF8,RAC2,RAB5A,STUB1,HSPA1A,SRC,WAS,NCK2,CDH5,SPHK1,AGT,TMOD3,GMFG,NTN1,NRXN1,GJA1,TSG101,PTPN11,ARFIP1,DNM2,MAPK9…
axon regeneration	25	38	3	0.023	0.000679945	PTN,JAK2,STK24,INPP5F,FLNA,GAP43,BCL2,NEFL,FKBP1B,RTN4RL1,KLK8,CTNNA1,APOA1,CHL1,EPHA4,DHFR,APOD,PTEN,GRN,TNC,RTN4R,MAP2K1,NDEL1,SPP1,LRP1
homotypic cell-cell adhesion	37	62	2.4	0.023	0.000679987	JAK2,COMP,FERMT3,ITGA2B,ILK,PRKCA,UBASH3B,CSRP1,LYN,MYL9,SERPINE2,FLNA,MYL12A,PLEK,SYK,CLIC1,MPL,PTPN6,F11R,HSPB1,METAP1,FIBP,LGALS1,PEAR1,DMTN,C1QTNF1,PPIA,PRKCQ,CCL5,PIK3CG,GP6,FN1,IL6,PTPRU,VCL,RDX,XG
regulation of cell-substrate adhesion	67	126	1.8	0.023	0.000685183	PRKCZ,AP1AR,MDK,CSF1,None,PTN,JAK2,PLG,ROCK2,ILK,SFRP1,OLFM4,PTK2B,MMP12,JAG1,HRG,RRAS,ARHGAP6,FLNA,RASA1,BCL2,CD36,RAC2,SRC,CASS4,PTPN11,DNM2,NID1,GSK3B,POSTN,LGALS1,ADAM15,SMAD3,STK4,GBP1,UNC13D,DUSP3,DMTN,ARPC2,CIB1,APOA1,RAC1,RHOA,ABL1,ACTN4,CCN1,CDC42,DDR1,VEGFA,MYOC,APOD,PTEN,PPM1F,CRK,DAPK3,CRKL,VIT,FN1,EGFL6,BCL6,RAC3,VWC2,EPHA1,VCL,SERPINE1,ANGPT2,LRP1
cellular response to organonitrogen compound	135	280	1.5	0.023	0.000686559	PRKCZ,VIM,SOD1,AHSG,JAK2,EDN1,ROCK2,PRKACA,SFRP1,CSK,NTRK2,FER,SNX5,LYN,STAT6,PRKCB,FLNA,SLC9A3R1,INHBB,PENK,GRB2,INSR,MAPK3,GSK3A,CD36,CTNNB1,AHCYL1,PDPK1,GNAI3,SRC,RPS6KB1,AGT,CASP3,MARS1,GJA1,PTPN11,PTGS2,AKT1,DNM2,SIRT2,TNS2,PID1,YWHAG,AKT2,GSK3B,VWA2,PPP1R9B,FYN,IMPACT,PIK3CA,IGF1R,BCAR3,GOLPH3,DMTN,TMEM38B,PIP4K2B,PIP4K2A,CCNA2,RAB13,SULT1A3,CTNNA1,APRT,GHR,TGM2,BCL2L1,AIF1,MAPK1,STAT3,EPHA…
regulation of catabolic process	193	416	1.4	0.023	0.00069516	VIM,SPTLC2,HDAC6,ROCK2,PRKACA,RAB7A,PRKCA,SNX5,PTK2B,HGS,CDK2,DAB2,KAT5,SCARB2,TBK1,SERPINE2,OPHN1,FLNA,ATP6V1C2,MAPK8,SMURF1,IL4,INSR,MAPK3,GSK3A,BCL2,FAP,MAGEA6,SNF8,SNX12,HGF,STUB1,IKBKG,HSPA1A,GNAI3,TRIM40,CASP3,DEPP1,GJA1,CIRBP,IL10RA,DCN,GDNF,AKT1,FURIN,ZC3H12A,MAPK9,SIRT2,GGA1,TNFAIP3,GPX1,KHSRP,CPTP,AKT2,UBE2K,WWP1,GSK3B,HSPB1,PRKAA2,ABL2,MAPKAPK2,PYCARD,FYN,PIK3CA,ATP6V1C1,CEBPA,SMAD3,US…
purine ribonucleoside triphosphate metabolic process	26	40	2.9	0.023	0.000702544	TGFB1,NME2,IL4,GNAI3,PID1,ATP5PO,NME4,VCP,NME7,STAT3,RHOA,PKLR,ENO1,RHOQ,ATP5F1B,NUDT2,ATP5PF,RAN,TREM2,PPARA,RAB23,ITPA,NME1,IMPDH1,VPS9D1,ALDOA
negative regulation of cell communication	282	629	1.3	0.023	0.000703459	ISG15,SFRP5,PRKCZ,NPPA,MDK,AHSG,RGS5,WFIKKN1,EDN1,PRKACA,RAB7A,ITGAV,SFRP1,PPIF,CSK,CRIM1,TGFB3,SNX5,DNM1,PTK2B,UBASH3B,LYN,SERPINB3,PRKCB,INPP5F,MMP12,HRG,HGS,OAS1,NPLOC4,DAB2,RGS10,SERPINE2,RAB11FIP3,ECM1,SLC9A3R1,SYTL4,RGS18,INHBB,SMURF1,MPIG6B,IL4,BMP2,RASA1,GSK3A,BCL2,PLEK,CTNNB1,HGF,CD22,STUB1,PDPK1,HSPA1A,GNAI3,MINAR1,TANK,SRC,NCK2,RPS6KB1,HADH,UBE2D1,TRIM40,AGT,CBL,GJA1,TSG101,DCN,CPNE1,P…
protein secretion	89	175	1.7	0.023	0.000705238	NADK,TGFB1,ADCYAP1,JAK2,SAA1,COMP,SVBP,SFRP1,TGFB3,PDIA4,CAVIN1,RAB11FIP3,SYTL4,GOLPH3L,INHBB,GLUL,SNCG,PLEK,RAB3D,RAB3C,HADH,GJA1,PTPN11,ARFIP1,PICK1,SMAD2,FKBP1B,NECAB3,GOLPH3,NAGPA,DMTN,ALOX5,PPP3CA,ENSA,C1QTNF3,ACHE,RAB3A,BLOC1S3,RAB13,STX4,RAC1,TGFB2,RAB8B,BAD,C2CD2L,OXCT1,CYB5R4,OSBP,UBE2Q1,PPIA,RAF1,OLFM2,RAB11B,STX1A,NR0B2,IL1RN,CBLN1,CCL5,PPID,SIRT3,ARF1,PIK3C3,NDUFAF2,TREM2,CD2AP,ERP29,…
regulation of cell development	128	264	1.5	0.023	0.000711095	CLEC7A,AP1AR,TGFB1,EFNB3,ADCYAP1,MDK,PTN,LTA,SPINT1,ROCK2,ILK,DBNL,PLXNA4,NTRK2,RAB11A,DCC,ID2,OLFM4,KIT,CTDSP1,RAB21,LYN,NAP1L1,SEMA3B,YWHAH,SERPINE2,FLNA,PPP1CC,L1CAM,BMP2,GSK3A,BCL2,ROBO2,CTNNB1,CDH5,CASS4,HES5,PLXNA1,CRABP2,NTN1,NEFL,PLXNC1,AKT1,MPL,DNM2,SIRT2,F11R,SEMA4G,PLCB1,GSK3B,BMP4,POSTN,ISLR2,SMAD4,NUMB,GBP1,UNC13D,DMTN,BDNF,ARPC2,EIF4G2,PPP3CA,CIB1,SEMA6D,CTNNA1,FRZB,IST1,APOA1,RAC1,…
lipid oxidation	33	54	2.5	0.023	0.000729194	IVD,CRAT,ACOX1,HADH,AKT1,SLC27A2,DECR1,AKT2,SCP2,ADH5,CROT,HSD17B4,ALOX5,ACADM,PLA2G7,ACADVL,ALOX15B,ECHS1,ACOT8,HSD17B10,APOD,ECI2,DECR2,ECH1,PPARA,MAPK14,GCDH,FABP3,ADIPOQ,ECHDC1,ACAT1,ECI1,LEP
movement of cell or subcellular component	420	966	1.3	0.024	0.000748069	PRKCZ,CLEC7A,AP1AR,BSG,TGFB1,GFRA3,EFNB3,SOD1,MDK,CSF1,ARHGDIA,None,PTN,BMP10,JAK2,PLA2G10,HDAC6,SAA1,CCL27,CHST4,BIN2,FERMT3,FGF22,EDN1,ROCK2,SNTA1,SVBP,ITGA2B,THBS4,ILK,ITGAV,SFRP1,PLXNA4,GPNMB,LRRC15,NTRK2,VASP,PRKCA,FER,RAB11A,DCC,LCP1,PDLIM1,KIT,INPP5B,PTK2B,STK24,DSTN,RAB1A,CEP43,RHOC,RAB21,LYN,SERPINB3,AKT3,XCL1,CNTN4,INPP5F,FGF3,MMP12,JAG1,HRG,SEMA3B,RRAS,DAB2,EPHA10,CAVIN1,SERPINE2,CXCL1…
organic substance catabolic process	413	949	1.3	0.024	0.00076355	ISG15,PSMA2,TGFB1,VIM,PLA2G5,UPP1,CTSF,PLA2G10,PLA2G2C,PON1,ABHD12,HDAC6,ROCK2,ENO2,PRKACA,PGLYRP2,RAB7A,KLHL3,PDE5A,PRKCA,SNX5,ANAPC7,ANAPC10,PYGB,INPP5B,PTK2B,INPP5A,UBA7,IVD,AHCY,INPP5F,MMP12,HGS,CDK2,NT5C,NPLOC4,DAB2,KAT5,TOLLIP,SCARB2,YWHAH,PSMA1,SERPINE2,OPHN1,FLNA,SMURF1,GLUL,MTHFS,XPNPEP1,GALK1,BPGM,INSR,PGK1,GSK3A,DERL1,FAP,USP4,CTNNB1,CRAT,SNF8,SNX12,ACOX1,STUB1,HSPA1A,PAFAH2,SPHK1,HADH…
cell surface receptor signaling pathway	583	1370	1.2	0.024	0.00077099	ISG15,CDON,SFRP5,IL22RA1,PRKCZ,CLEC7A,BSG,CD4,TNFSF10,TGFB1,GFRA3,NPPA,MX1,EFNB3,VIM,RUVBL1,MDK,CSF1,ARHGDIA,AHSG,ZBP1,None,FGFBP3,CTSG,PTN,BMP10,SHC4,EDA2R,GALNT3,FCGR1A,JAK2,BLNK,MAP2K4,NETO1,COMP,FGFR3,FERMT3,WFIKKN1,FGF22,EDN1,ITGA2B,PRKACA,IL12RB1,ILK,RAB7A,ITGAV,SFRP1,CSK,LRRFIP2,PLXNA4,NTRK2,CRIM1,TGFB3,PRKCA,FER,DCC,SNX5,RSPO2,KIT,PTK2B,UBASH3B,IFNL2,LYN,BTK,STAT6,XCL1,PRKCB,INPP5F,IL15RA…
intracellular signal transduction	492	1144	1.2	0.024	0.000775049	SFRP5,PRKCZ,CLEC7A,CD4,TNFSF10,TGFB1,NPPA,SOD1,ADCYAP1,PLA2G5,CSF1,ARHGDIA,None,SHC4,EDA2R,PRDX4,JAK2,BLNK,MAP2K4,FGFR3,EDN1,ROCK2,PRKACA,ILK,ITGAV,SFRP1,PPIF,CSK,DBNL,GPNMB,NTRK2,PRKCA,FER,LCP1,KIT,ZWINT,PTK2B,STK24,INPP5A,PRKAR2B,RHOC,RAB21,NUCB1,LYN,BTK,SERPINB3,AKT3,XCL1,PRKCB,INPP5F,CDK2,ARL6IP5,NPLOC4,RRAS,RABIF,KAT5,TBK1,SERPINE2,ARHGAP6,OPHN1,FLNA,PPP1CC,ECM1,SLC9A3R1,ARFIP2,DOK2,MAPK8,AR…
positive regulation of cell differentiation	212	462	1.4	0.025	0.000791349	ISG15,CDON,PRKCZ,CLEC7A,CD4,TGFB1,MDK,PLA2G5,CSF1,None,PTN,BMP10,JAK2,PLA2G10,LTA,SPINT1,EDN1,IL12RB1,ILK,SFRP1,DBNL,PLXNA4,NTRK2,TGFB3,PRKCA,RAB11A,ID2,OLFM4,KIT,PAX8,RAB21,LYN,BTK,SERPINB3,NAP1L1,IL15RA,JAG1,PIM1,NME2,RRAS,DAB2,SERPINE2,FLNA,PPP1CC,L1CAM,SMAD5,IL4,BMP2,SMAP1,BCL2,ROBO2,SYK,CD36,CTNNB1,HGF,HSPA1A,CDH5,CASS4,FGF8,AGT,PLXNA1,CRABP2,NTN1,NFKBID,GJA1,NEFL,CPNE1,CLIC1,PLXNC1,GDNF,PTG…
small molecule metabolic process	365	832	1.3	0.025	0.000816075	NADK,TGFB1,NPPA,SOD1,PLA2G5,SPTLC2,MPO,UPP1,HSD17B7,PLA2G10,PON1,WARS1,ABHD12,EDN1,ENO2,MDH2,PRTFDC1,PDE5A,AK2,WARS2,HPGDS,KIT,INPP5B,PTK2B,IP6K2,TNXB,FAM3A,INPP5A,PRKAR2B,IVD,CS,AHCY,NME2,NT5C,OAS1,CA13,PTH1R,TYRP1,HARS1,GLUL,DARS1,RBP1,MTHFS,CRYL1,GALK1,ME2,IL4,BPGM,NARS1,BMP2,RPIA,INSR,AASDHPPT,PGK1,MAPK3,GSK3A,PLEK,SYK,CD36,POFUT1,AHCYL1,CRAT,LDLRAP1,ACOX1,GNAI3,ZADH2,CA6,SRC,SPHK1,HADH,CA1,Y…
oxoacid metabolic process	195	422	1.4	0.026	0.000838518	PLA2G5,MPO,PLA2G10,PON1,WARS1,ABHD12,EDN1,ENO2,MDH2,WARS2,HPGDS,KIT,TNXB,PRKAR2B,IVD,CS,AHCY,TYRP1,HARS1,GLUL,DARS1,RBP1,MTHFS,CRYL1,GALK1,ME2,BPGM,NARS1,INSR,AASDHPPT,PGK1,MAPK3,SYK,CD36,CRAT,ACOX1,ZADH2,HADH,YARS1,MARS1,CRABP2,GFPT2,PTGS2,AKT1,AARS1,SLC27A2,THEM4,DECR1,GPX1,DARS2,AKT2,PRKAA2,ACSF2,MAPKAPK2,SCP2,ACADSB,SHMT2,ADH5,CROT,HSD17B4,BTD,ALOX5,TARS1,ACADM,IDH3G,ALDH6A1,SULT1A3,APOA1,ABH…
response to growth factor	195	422	1.4	0.026	0.000838518	SFRP5,TGFB1,None,FGFBP3,PTN,BMP10,GALNT3,HDAC6,COMP,FGFR3,WFIKKN1,FGF22,SPINT1,EDN1,ROCK2,ILK,SFRP1,LUM,NTRK2,CRIM1,TGFB3,FER,XCL1,PRKCB,FGF3,HRG,HGS,DAB2,CLEC3B,FGFBP1,PENK,ITGA5,SMURF1,VIL1,SMAD5,ARPC3,IL4,BMP2,MAPK3,FGF5,CTNNB1,HGF,STUB1,PDPK1,HSPA1A,KLB,SRC,CDH5,RPS6KB1,ZYX,SPHK1,GDF10,FGF8,ERBB2,UBE2D1,HES5,AGT,CBL,CASP3,MARS1,DCN,PTPN11,GDF9,SH3GL2,RBPMS2,AKT1,FURIN,DNM2,MEIS2,SIRT2,SOST,BM…
protein localization to extracellular region	90	178	1.6	0.026	0.000840442	NADK,TGFB1,ADCYAP1,JAK2,SAA1,COMP,SVBP,SFRP1,TGFB3,PDIA4,CAVIN1,RAB11FIP3,SYTL4,GOLPH3L,INHBB,GLUL,SNCG,PLEK,RAB3D,RAB3C,HADH,GJA1,PTPN11,ARFIP1,PICK1,SMAD2,FKBP1B,NECAB3,GOLPH3,NAGPA,DMTN,AFM,ALOX5,PPP3CA,ENSA,C1QTNF3,ACHE,RAB3A,BLOC1S3,RAB13,STX4,RAC1,TGFB2,RAB8B,BAD,C2CD2L,OXCT1,CYB5R4,OSBP,UBE2Q1,PPIA,RAF1,OLFM2,RAB11B,STX1A,NR0B2,IL1RN,CBLN1,CCL5,PPID,SIRT3,ARF1,PIK3C3,NDUFAF2,TREM2,CD2AP,ER…
carboxylic acid metabolic process	189	408	1.4	0.026	0.000866291	PLA2G5,PLA2G10,PON1,WARS1,ABHD12,EDN1,ENO2,MDH2,WARS2,HPGDS,KIT,TNXB,PRKAR2B,IVD,CS,AHCY,TYRP1,HARS1,GLUL,DARS1,RBP1,MTHFS,CRYL1,GALK1,ME2,BPGM,NARS1,INSR,AASDHPPT,PGK1,MAPK3,SYK,CD36,CRAT,ACOX1,ZADH2,HADH,YARS1,MARS1,CRABP2,GFPT2,PTGS2,AKT1,AARS1,SLC27A2,THEM4,DECR1,GPX1,DARS2,AKT2,PRKAA2,ACSF2,MAPKAPK2,SCP2,ACADSB,SHMT2,ADH5,CROT,HSD17B4,BTD,ALOX5,TARS1,ACADM,IDH3G,ALDH6A1,APOA1,ABHD5,AMT,STAT3…
plasma membrane bounded cell projection organization	282	631	1.3	0.027	0.000896442	CRTAC1,PRKCZ,BSG,GFRA3,LST1,EFNB3,VIM,SOD1,ATF1,ADCYAP1,MDK,SULT4A1,PTN,JAK2,PLA2G10,KEL,HDAC6,SVBP,ILK,SFRP1,DBNL,PLXNA4,NTRK2,VASP,TGFB3,FER,RAB11A,DCC,KIT,PTK2B,STK24,RAB21,LYN,CNTN4,INPP5F,HRG,NME2,RILPL1,SEMA3B,EPHA10,SCARB2,YWHAH,OPHN1,FLNA,SLC9A3R1,CNTN1,L1CAM,AGRN,NECTIN1,ARFIP2,SMURF1,MAPRE1,VIL1,ARF4,RTN4IP1,INSR,GAP43,GSK3A,BCL2,NCKIPSD,ROBO2,PLEK,CTNNB1,RAC2,RAB5A,HGF,VAPA,LRRC4C,MINA…
negative regulation of response to stimulus	349	794	1.3	0.028	0.000916605	ISG15,SFRP5,PRKCZ,NPPA,SOD1,ADCYAP1,MDK,AHSG,KNG1,CLEC4G,RGS5,SAA1,PLG,WFIKKN1,EDN1,PRKACA,PGLYRP2,RAB7A,ITGAV,SFRP1,PPIF,CSK,CRIM1,TGFB3,FER,VSIG4,SNX5,DNM1,UBASH3B,FAM3A,LYN,STAT6,SERPINB3,AKT3,XCL1,PRKCB,INPP5F,MMP12,HRG,HGS,SEMA3B,OAS1,IFNL1,NPLOC4,DAB2,RGS10,IL22RA2,SERPINE2,ECM1,SLC9A3R1,RGS18,SMURF1,MPIG6B,IFNB1,IL4,BMP2,RASA1,GSK3A,BCL2,ROBO2,PLEK,CR2,APCS,SYK,FAP,CTNNB1,HGF,CD22,STUB1,PD…
cellular macromolecule catabolic process	209	456	1.4	0.028	0.000929629	ISG15,PSMA2,VIM,CTSF,HDAC6,ROCK2,PRKACA,RAB7A,KLHL3,PRKCA,SNX5,ANAPC7,ANAPC10,PTK2B,UBA7,MMP12,CDK2,NPLOC4,DAB2,KAT5,TOLLIP,PSMA1,OPHN1,SMURF1,GSK3A,DERL1,FAP,USP4,CTNNB1,SNF8,STUB1,HSPA1A,UBE2D1,ATE1,CBL,DNASE1L2,CIRBP,TSG101,GDNF,AKT1,FURIN,UBXN4,ZC3H12A,MAPK9,FAF2,SIRT2,HPSE,TNFAIP3,MANBA,GPX1,KHSRP,UBE2K,WWP1,GSK3B,PSMB4,MAPKAPK2,GSPT2,UBE2N,UBA6,CEBPA,USP8,USP12,UFD1,ASCC2,GIPC1,ARRB1,PSMD6,…
interleukin-1-mediated signaling pathway	11	13	8.7	0.029	0.000974533	ZBP1,TOLLIP,MAPK3,PLCB1,IRAK4,IL1RN,IL1B,IL1R1,IL1R2,IKBKB,IL6
Golgi vesicle transport	60	112	1.8	0.03	0.00100427	AP1AR,CSK,RAB1A,COPB2,RABIF,ARF5,GOLPH3L,RAB6B,ARF4,AP1G2,SNX12,VAPA,TRAPPC6B,SNX8,CYTH3,RER1,DNM2,GGA1,SPAST,ARFGAP2,PICK1,GOLPH3,TRAPPC2,TBC1D20,RABEP1,VCP,RAB13,GGA3,STXBP6,EHD3,SAR1A,NKD2,ARL3,SNX1,LMAN2L,RAB8B,STX6,RAB6A,SCFD1,RAB1B,NAPG,RP2,VTI1B,RAB14,USO1,ARF1,RAB31,STX17,SEC22A,GABARAPL2,KIF1C,CUL3,VTI1A,NAPA,PRKCI,RNF215,RACK1,TMED10,COMMD1,BCAP31
negative regulation of hydrolase activity	115	236	1.5	0.031	0.00103882	PRKCZ,ADCYAP1,AHSG,KNG1,MICAL1,WFIKKN1,SPINT1,ROCK2,PPIF,CRIM1,SERPINB3,HRG,ANGPTL4,SERPINE2,ECM1,VIL1,SERPINA3,ITIH4,APCS,HGF,CST7,SRC,SERPING1,OPRPN,AGT,ARL6IP1,PTGS2,AKT1,FURIN,CDKN2D,F11R,GPX1,CR1,GSK3B,PPP1R9B,TIPRL,FKBP1B,ITIH1,SERPINB13,ITIH2,RPS6KA3,ARRB1,PLA2R1,IFI16,APOA1,BICD1,ANOS1,ITIH5,TNNT2,UCHL5,TIMP1,CD109,TGFB2,CSNK2A1,NEIL1,ABL1,TFPI,C5,PAPLN,VEGFA,PRDX3,MAP2K5,CD27,GZMA,RAF1,P…
cellular metabolic process	1500	3716	1.2	0.031	0.00104099	H2AW,CELF2,NADK,ISG15,SFRP5,PRKCZ,CLEC7A,TCL1B,PSMA2,AP1AR,CD4,TNFSF10,TGFB1,NPPA,VIM,SOD1,H2AZ1,ATF1,RUVBL1,MRPS14,CCNA1,ADCYAP1,MDK,PLA2G5,C12orf65,CSF1,SPTLC2,AHSG,MPO,SULT4A1,UPP1,None,CTSG,HSD17B7,RPP25L,BMP10,KNG1,MICAL1,CHMP1A,EDA2R,GALNT3,FCGR1A,PRDX4,CTSF,JAK2,PLA2G10,PLA2G2C,PON1,WARS1,MAP2K4,ABHD12,M1AP,EVPL,HDAC6,CHST4,ZNF10,CES3,FGFR3,B4GALT3,WFIKKN1,FGF22,SPINT1,EDN1,ROCK2,SNTA1,SVB…
cytokinesis	36	61	2.3	0.031	0.00106817	PRC1,CHMP1A,ROCK2,ANXA11,RAB11A,RHOC,CHMP2B,RAB11FIP3,CHMP1B,RASA1,MITD1,SPAST,USP8,SEPTIN1,GIPC1,PIN1,IST1,VPS4A,BCL2L1,ARL3,RHOA,SEPTIN6,CHMP2A,CDC42,VPS4B,STAMBP,ARF1,CHMP6,PIK3C3,PDCD6IP,PDXP,CUL3,KIF23,RACGAP1,PKN2,CHMP4A
nucleoside triphosphate metabolic process	36	61	2.3	0.031	0.00106817	TGFB1,NME2,IL4,GNAI3,PID1,ATP5PO,NME4,VCP,NME7,SMPDL3A,STAT3,NUDT15,DTYMK,RHOA,UCK1,CTPS1,PKLR,ENO1,CMPK1,RHOQ,TBPL1,ATP5F1B,NUDT2,ATP5PF,RAN,DCTPP1,GUK1,TREM2,PPARA,RAB23,RRM2B,ITPA,NME1,IMPDH1,VPS9D1,ALDOA
cellular response to growth factor stimulus	186	403	1.4	0.034	0.00118262	SFRP5,TGFB1,None,FGFBP3,PTN,BMP10,GALNT3,COMP,FGFR3,WFIKKN1,FGF22,SPINT1,EDN1,ILK,SFRP1,NTRK2,CRIM1,TGFB3,XCL1,PRKCB,FGF3,HRG,HGS,DAB2,CLEC3B,FGFBP1,PENK,ITGA5,SMURF1,VIL1,SMAD5,ARPC3,IL4,BMP2,MAPK3,FGF5,CTNNB1,HGF,STUB1,PDPK1,HSPA1A,KLB,SRC,CDH5,RPS6KB1,ZYX,SPHK1,GDF10,FGF8,ERBB2,UBE2D1,HES5,AGT,CBL,CASP3,MARS1,DCN,PTPN11,GDF9,SH3GL2,RBPMS2,AKT1,FURIN,DNM2,SIRT2,SOST,BMP4,HSPB1,IBSP,POSTN,MAPKAP…
nitrogen compound metabolic process	1412	3489	1.2	0.035	0.00120333	H2AW,CELF2,NADK,ISG15,MMP17,SFRP5,PRKCZ,CLEC7A,TCL1B,PSMA2,CD4,TNFSF10,TGFB1,NPPA,ADAMDEC1,VIM,SOD1,TMPRSS15,H2AZ1,ATF1,RUVBL1,MRPS14,CCNA1,ADCYAP1,MDK,PLA2G5,C12orf65,CSF1,SPTLC2,AHSG,UPP1,None,CTSG,RPP25L,BMP10,KNG1,MICAL1,CHMP1A,EDA2R,GALNT3,FCGR1A,MMP16,PRDX4,CTSF,JAK2,PLA2G10,PON1,WARS1,KEL,MAP2K4,ABHD12,M1AP,EVPL,HDAC6,CHST4,ZNF10,COMP,FGFR3,B4GALT3,PLG,WFIKKN1,FGF22,SPINT1,EDN1,ROCK2,SNTA1…
phosphorylation	403	929	1.2	0.035	0.00120366	NADK,PRKCZ,CLEC7A,TCL1B,CD4,TGFB1,NPPA,SOD1,CCNA1,ADCYAP1,CSF1,CTSG,BMP10,MICAL1,FCGR1A,PRDX4,JAK2,WARS1,MAP2K4,HDAC6,FGFR3,FGF22,EDN1,ROCK2,ENO2,PRKACA,THBS4,ILK,SFRP1,CSK,GPNMB,NTRK2,TGFB3,PRKCA,FER,AK2,KIT,CTDSP1,PTK2B,UBASH3B,STK24,IP6K2,TNXB,PRKAR2B,CEP43,VRK1,LYN,BTK,SERPINB3,AKT3,PRKCB,INPP5F,FGF3,MAPRE3,HRG,PIM1,NME2,HGS,CDK2,IFNL1,NEK7,DAB2,EPHA10,TOLLIP,IL22RA2,VAC14,TBK1,TNKS,SLC9A3R1,…
fatty acid transport	26	41	2.7	0.035	0.001216	PLA2G5,PLA2G10,PLA2G2C,EDN1,SYK,CD36,RPS6KB1,MAP2K6,PLA2G12A,AKT1,SLC27A2,PLA2G2A,AKT2,CROT,PLA2R1,GOT2,FIS1,ACE,PLA2G4A,ATP5PF,IL1B,PPARA,FABP3,FABP4,PLA2G12B,PLA2G1B
fatty acid catabolic process	29	47	2.6	0.035	0.00121861	IVD,CRAT,ACOX1,HADH,AKT1,SLC27A2,DECR1,AKT2,SCP2,CROT,HSD17B4,ACADM,ACADVL,MCEE,ECHS1,ACOT8,HSD17B10,ECI2,DECR2,LPIN1,ECH1,PPARA,GCDH,ADIPOQ,ECHDC1,ACAT1,ECI1,CEL,LEP
striated muscle hypertrophy	28	45	2.6	0.035	0.00122424	NPPA,BMP10,MAP2K4,EDN1,ROCK2,PRKCA,INPP5F,GSK3A,AGT,PDLIM5,SMAD4,SMAD3,PPP3CA,PIN1,HAMP,MYOC,CAMK2D,TWF1,G6PD,CSRP3,TNFRSF1B,IGFBP5,PPARA,HDAC2,TTN,GLRX3,LEP,TNFRSF1A
mitotic cell cycle	149	316	1.4	0.035	0.00123583	TGFB1,CCNA1,PRC1,CHMP1A,EDN1,ROCK2,GPNMB,PRKCA,RAB11A,ID2,ANAPC7,CTDSP1,ZWINT,VRK1,RHOC,CHMP2B,PRKCB,CDK2,NEK7,TNKS,FLNA,SLC9A3R1,EIF4E,CTDSPL,CHMP1B,ADAMTS1,RASA1,INSR,BCL2,MITD1,CTNNB1,HGF,HSPA1A,RPS6KB1,CCNE1,SPHK1,CRADD,FGF8,TMOD3,GJA1,NAA10,PTPN11,AKT1,DNM2,PTPN6,CDKN2D,MEIS2,SIRT2,SPAST,TBCE,PLCB1,BMP4,PPP1R9B,KPNB1,SMAD3,USP8,VCPIP1,DUSP3,SUGT1,DCTN6,NAE1,PPP3CA,ENSA,PIN1,SYF2,CIB1,CCNA2,V…
negative regulation of proteolysis	112	230	1.5	0.035	0.00123933	AHSG,KNG1,MICAL1,HDAC6,WFIKKN1,SPINT1,CRIM1,SERPINB3,HRG,SERPINE2,OPHN1,ECM1,VIL1,SERPINA3,ITIH4,SNX12,HGF,CST7,SRC,SERPING1,OPRPN,AGT,ARL6IP1,PTGS2,AKT1,FURIN,CDKN2D,GPX1,CR1,ITIH1,SERPINB13,GIPC1,ITIH2,RPS6KA3,IFI16,ANOS1,ITIH5,UCHL5,TIMP1,EPHA4,CD109,PDCL3,CSNK2A1,SHH,TFPI,C5,PML,PAPLN,VEGFA,PRDX3,MAP2K5,CD27,DDRGK1,RAF1,PIH1D1,CSTL1,SGTA,SERPINH1,A2M,SERPINA1,SERPINB8,SERPINA10,CSNK2A2,ITIH3,…
positive regulation of intracellular signal transduction	229	506	1.3	0.035	0.00124722	PRKCZ,CLEC7A,CD4,TNFSF10,TGFB1,NPPA,SOD1,ADCYAP1,PLA2G5,CSF1,None,EDA2R,JAK2,FGFR3,EDN1,ROCK2,ILK,ITGAV,CSK,GPNMB,NTRK2,PRKCA,KIT,PTK2B,RHOC,LYN,AKT3,XCL1,PRKCB,ARL6IP5,TBK1,FLNA,ECM1,SLC9A3R1,BMP2,INSR,MAPK3,SYK,CD36,CTNNB1,HGF,VAPA,IKBKG,HSPA1A,KLB,SRC,NCK2,SPHK1,CASS4,FGF8,ERBB2,AGT,CBL,MAP2K6,GJA1,CSF1R,DCN,CPNE1,PTPN11,CCL13,ZC3H12A,PTPN6,PLA2G2A,IRF3,F11R,CCL22,HPSE,CCL7,GPX1,PLCB1,BMP4,TNF…
cellular response to peptide hormone stimulus	75	146	1.7	0.035	0.00125865	PRKCZ,AHSG,JAK2,EDN1,ROCK2,CSK,FER,SNX5,LYN,STAT6,PRKCB,INHBB,GRB2,INSR,GSK3A,AHCYL1,PDPK1,SRC,RPS6KB1,AGT,MARS1,PTPN11,AKT1,TNS2,PID1,YWHAG,AKT2,GSK3B,VWA2,FYN,PIK3CA,IGF1R,BCAR3,PIP4K2B,PIP4K2A,CCNA2,RAB13,APRT,GHR,STAT3,RAB8B,GRB10,PKLR,LPL,PRKCQ,RHOQ,HSF1,PKM,PCSK9,NFKB1,MAX,GSTP1,USO1,STAT5A,PTEN,SHC1,CRK,RAB31,IL1B,SYAP1,KL,GHRL,CSRP3,LPIN1,SELENOS,NDEL1,GLP1R,GPT,GAB1,ADIPOQ,PRKCI,TRIM72,C…
positive regulation of cellular component biogenesis	124	258	1.5	0.036	0.00130298	ISG15,CLEC7A,AP1AR,TGFB1,WARS1,ROCK2,RAB7A,SFRP1,NTRK2,VASP,TGFB3,PRKCA,FER,FHOD1,LCP1,KIT,PTK2B,ARPC1B,RHOC,HRG,HGS,CLSTN3,CBLN2,FLNA,AGRN,ARFIP2,MAPRE1,VIL1,ARPC3,GRB2,PLEK,SYK,CD36,SNF8,RAC2,STUB1,HSPA1A,SRC,WAS,NCK2,CDH5,AGT,GMFG,NRXN1,TSG101,PTPN11,ARFIP1,DNM2,MAPK9,GMFB,GSK3B,PYCARD,PFN1,PICK1,PIK3CA,SMAD3,BDNF,ARPC2,PIP4K2B,PIP4K2A,PLCG2,VCP,APOA1,RAC1,DRG1,VPS4A,AMIGO2,RALB,ARL3,ARPC5,CXC…
protein catabolic process	200	437	1.4	0.036	0.00130756	ISG15,PSMA2,CTSF,ABHD12,HDAC6,PRKACA,RAB7A,KLHL3,SNX5,ANAPC7,ANAPC10,PTK2B,UBA7,MMP12,HGS,CDK2,NPLOC4,DAB2,KAT5,TOLLIP,PSMA1,SERPINE2,OPHN1,FLNA,SMURF1,GSK3A,DERL1,FAP,USP4,CTNNB1,SNF8,SNX12,STUB1,HSPA1A,UBE2D1,TRIM40,ATE1,CBL,GJA1,TSG101,AKT1,FURIN,UBXN4,MAPK9,FAF2,SIRT2,GGA1,HPSE,TNFAIP3,MANBA,GPX1,UBE2K,WWP1,GSK3B,PSMB4,UBE2N,FYN,UBA6,CEBPA,SMAD3,USP8,USP12,UFD1,ASCC2,GIPC1,PIN1,ARRB1,PSMD6,HA…
protein localization to vacuole	16	22	4.2	0.036	0.00130857	ROCK2,RAB7A,HGS,SCARB2,SMURF1,SNF8,TNFAIP3,GBP1,NAGPA,GGA3,VPS4A,VPS28,VPS25,HSPA8,CD81,RNF215
regulation of actin filament organization	65	124	1.8	0.036	0.00133705	AP1AR,ROCK2,SFRP1,DBNL,VASP,TGFB3,FER,FHOD1,PTK2B,DSTN,ARPC1B,RHOC,CAPZA1,ARHGAP6,FLNA,ARFIP2,VIL1,ARPC3,NAA80,GRB2,RASA1,PLEK,WAS,NCK2,TMOD3,GMFG,ARFIP1,F11R,GMFB,PYCARD,PFN1,PICK1,PIK3CA,SMAD3,DMTN,ARPC2,FLII,APOA1,RAC1,ARPC5,RHOA,TWF2,PPFIA1,ABL1,HAX1,GSN,ADD2,CDC42,TMOD2,CCL26,BAG4,MYOC,TWF1,EVL,ARF1,PPM1F,TMOD1,CAPG,PDXP,ESAM,SLIT2,HCLS1,EPHA1,RDX,CSF3
positive regulation of protein transport	82	162	1.6	0.037	0.00134854	NADK,PRKCZ,TGFB1,JAK2,PRKACA,TGFB3,ZFAND1,FLNA,SYTL4,GOLPH3L,MAPK8,GLUL,GSK3A,RAC2,SRC,ERBB2,GJA1,TSG101,PTGS2,ZC3H12A,AKT2,GSK3B,FYN,SMAD3,GOLPH3,C1QTNF3,ACHE,CIB1,NMT1,STX4,RNF31,SAR1A,RAC1,MAPK1,UBE2D3,TGFB2,BAD,C2CD2L,OXCT1,SHH,FIS1,VPS28,OSBP,CDC42,PPIA,UBL5,NR0B2,RAN,CSNK2A2,PPID,SIRT3,ARF1,GZMB,TREM2,CD2AP,MIEF1,ABLIM3,IL1B,VSNL1,GHRL,ADAM9,GLUD1,CACNB3,MAPK14,TTN,EZR,HTRA2,CD81,CFTR,SRI,C…
regulation of developmental process	498	1165	1.2	0.037	0.00134935	ISG15,CDON,SFRP5,PRKCZ,CLEC7A,AP1AR,CD4,TGFB1,LST1,EFNB3,SOD1,SMOC1,ADCYAP1,MDK,PLA2G5,CSF1,ARHGDIA,AHSG,None,PTN,BMP10,JAK2,PLA2G10,WARS1,KEL,HDAC6,COMP,FGFR3,LTA,SPINT1,EDN1,ROCK2,PRKACA,THBS4,IL12RB1,PGLYRP2,ILK,ITGAV,SFRP1,DBNL,PLXNA4,GPNMB,NTRK2,CRIM1,TGFB3,PRKCA,RAB11A,DCC,ID2,OLFM4,RSPO2,KIT,CTDSP1,PTK2B,UBASH3B,STK24,PAX8,RHOC,RAB21,LYN,BTK,STAT6,SERPINB3,ADAM12,NAP1L1,AKT3,PRKCB,CNTN4,IN…
cell morphogenesis involved in differentiation	161	345	1.4	0.038	0.00140188	AP1AR,BSG,GFRA3,EFNB3,SOD1,MDK,SULT4A1,PTN,PLA2G10,KEL,HDAC6,FERMT3,ILK,ITGAV,DBNL,PLXNA4,NTRK2,VASP,FER,RAB11A,DCC,OLFM4,RAB1A,RAB21,CNTN4,ANTXR1,RILPL1,SEMA3B,EPHA10,YWHAH,OPHN1,FLNA,SLC9A3R1,L1CAM,NECTIN1,MPIG6B,ATRN,GAP43,BCL2,ROBO2,CTNNB1,RAC2,LRRC4C,SRC,ENAH,EPHA6,CASS4,FGF8,ERBB2,CASP3,PLXNA1,CRABP2,NTN1,NRXN1,NEFL,ROBO3,PTPN11,PLXNC1,GDNF,MPL,DNM2,PTPN6,SPAST,SEMA4G,ACTN1,CNTN6,GSK3B,POST…
locomotion	393	906	1.2	0.038	0.0014064	PRKCZ,CLEC7A,AP1AR,BSG,TGFB1,GFRA3,EFNB3,MDK,CSF1,ARHGDIA,None,PTN,BMP10,JAK2,PLA2G10,HDAC6,SAA1,CCL27,CHST4,BIN2,FERMT3,FGF22,EDN1,ROCK2,SVBP,ITGA2B,THBS4,ILK,ITGAV,SFRP1,PLXNA4,GPNMB,LRRC15,NTRK2,VASP,PRKCA,FER,RAB11A,DCC,LCP1,PDLIM1,KIT,INPP5B,PTK2B,STK24,DSTN,RAB1A,CEP43,RHOC,LYN,SERPINB3,AKT3,XCL1,CNTN4,INPP5F,FGF3,MMP12,JAG1,HRG,SEMA3B,RRAS,DAB2,EPHA10,CAVIN1,SERPINE2,CXCL10,OPHN1,FLNA,FGFB…
nuclear membrane organization	12	15	6.3	0.038	0.00140914	PRKCA,VRK1,PRKCB,SIRT2,SPAST,UBE2I,VPS4A,CHMP2A,TOR1AIP1,NSFL1C,LPIN1,NDEL1
negative regulation of metabolic process	509	1193	1.2	0.038	0.00143249	ISG15,PRKCZ,AP1AR,TGFB1,NPPA,VIM,SOD1,AHSG,KNG1,MICAL1,CHMP1A,WARS1,HDAC6,ZNF10,WFIKKN1,SPINT1,EDN1,ROCK2,SNTA1,SVBP,PGLYRP2,ILK,ITGAV,SFRP1,PPIF,CSK,GPNMB,NTRK2,CRIM1,TGFB3,PRKCA,VSIG4,ID2,CTDSP1,UBASH3B,FAM3A,PRKAR2B,CEP43,LYN,BTK,STAT6,SERPINB3,XCL1,INPP5F,MMP12,HRG,CDK2,OAS1,IFNL1,NPLOC4,DAB2,KAT5,TBK1,TNKS,SERPINE2,OPHN1,SRSF7,FLNA,ECM1,EIF4E,INHBB,CTDSPL,VIL1,SMAD5,SRSF6,IFNB1,IL4,BMP2,SERP…
integrin-mediated signaling pathway	39	68	2.1	0.038	0.00143834	ISG15,PTN,FERMT3,ITGA2B,ILK,ITGAV,PTK2B,NME2,FLNA,ITGA5,ADAMTS1,MPIG6B,ITGA11,PLEK,SYK,SRC,ZYX,PTPN11,TEC,VAV1,ADAM15,DMTN,CCM2,CTNNA1,APOA1,TIMP1,ADAM11,ABL1,CDH17,CDC42,ITGAL,CD177,ADAM9,CUL3,FN1,ITGB7,ITGA1,FGR,LOXL3
ERBB signaling pathway	39	68	2.1	0.038	0.00143834	TGFB1,RAB7A,FER,SNX5,PTK2B,VIL1,ARF4,GRB2,STUB1,PDPK1,SRC,NCK2,AGT,CBL,TSG101,PTPN11,AKT1,PIK3CA,BCAR3,DUSP3,CNOT9,MAPK1,ABL1,LGMN,VPS25,MYOC,EGF,MVP,BRAF,SHC1,CHMP6,MMP9,AREG,MVB12B,GAB1,BTC,NCF1,PIGR,ITGA1
establishment of protein localization to membrane	53	98	1.9	0.038	0.00146071	RAB7A,CSK,RAB11A,ZDHHC4,RILPL1,GOLPH3L,MAPK8,GRIPAP1,SSR2,ERBB2,ARL6IP1,GGA1,REEP2,GET3,AKT2,TIMM10B,FYN,GOLPH3,MICALL1,DMTN,RILPL2,CIB1,TIMM10,NMT1,GGA3,ATP1B1,SAMM50,TIMM8A,NACA,RAB8B,FIS1,UBL4A,RAB11B,ATP13A1,EMC2,SGTA,MAPK10,BRAF,CAMLG,BAG6,GZMB,RAB31,MIEF1,BID,CACNB3,HSPA5,PRKCI,NCF1,GDI1,EMC8,RACK1,SRP19,CHMP4A
apoptotic signaling pathway	146	310	1.4	0.038	0.00146431	TNFSF10,TGFB1,SOD1,EDA2R,JAK2,FGFR3,ITGAV,SFRP1,PPIF,PRKCA,STK24,BTK,ARL6IP5,SLC9A3R1,INHBB,MAPK8,IFNB1,IL4,GSK3A,BCL2,CTNNB1,HGF,PDPK1,HSPA1A,GNAI3,SRC,NCK2,CRADD,AGT,CASP3,GDNF,PTGS2,AKT1,MAPK9,CDKN2D,TNFAIP3,GPX1,UBE2K,GSK3B,BMP4,HSPB1,TNFRSF10B,PYCARD,FYN,TXNDC12,SMAD3,STK4,RHOT1,BDNF,MCL1,CIB1,IFI16,NMT1,STX4,TRADD,CTNNA1,FGFR1,HNRNPK,BCL2L1,DNAJC10,EIF5A,TGFB2,BAD,SPI1,CSNK2A1,APAF1,SHH,ABL…
viral life cycle	88	176	1.6	0.039	0.00148694	ISG15,BSG,CD4,MX1,EFNB3,CHMP1A,CLEC4G,ROCK2,RAB7A,ITGAV,LRRC15,PCBP1,RAB1A,CHMP2B,SERPINB3,OAS1,SCARB2,NECTIN1,CHMP1B,ITGA5,IFNB1,ILF3,BCL2,CR2,APCS,DDX6,SNF8,RAB5A,VAPA,HSPA1A,TSG101,FURIN,GRK2,ZC3H12A,F11R,CR1,WWP1,LGALS1,TBC1D20,IFI16,CD209,VCP,IST1,VTA1,HMGA2,VPS4A,SRPK1,CHMP2A,GSN,PML,VPS28,CDC42,VPS4B,PPIH,PPIA,RAB1B,KPNA6,CD28,PTX3,HSPA1B,WWP2,SMPD1,CCL5,PPID,PPIE,CHMP6,HSPA8,SLPI,LGALS9,N…
negative regulation of translation	38	66	2.2	0.039	0.00149405	ROCK2,EIF4E,ILF3,DDX6,CIRBP,ZC3H12A,KHSRP,EIF2S1,SHMT2,RBM4,SAMD4B,TIA1,CNOT9,STAT3,FXR1,DHFR,NCL,DAPK1,YBX1,SYNCRIP,CNOT1,PRG3,HNRNPR,AGO1,GZMB,DAPK3,EIF4G1,DCPS,PNPT1,FMR1,EXOSC8,IGFBP5,FTO,PURA,RACK1,SHMT1,LSM1,AGO2
non-membrane-bounded organelle assembly	63	120	1.8	0.039	0.00149818	BMP10,PRC1,CHMP1A,BIN2,EDN1,DBNL,RAB11A,LCP1,CSRP2,CSRP1,CHMP2B,MAPRE3,CDK2,NEK7,TNKS,FLNA,CHMP1B,MAPRE1,VIL1,DDX6,HSPA1A,SRC,TMOD3,CIRBP,MAPK9,EIF2S1,PRKAA2,KPNB1,SMAD4,SEPTIN1,FLII,EIF2A,DRG1,BICD1,LIMD1,TNNT2,MAPRE2,RHOA,CHMP2A,NIP7,GSN,VPS4B,TMOD2,MRTO4,G3BP1,HSPA1B,ABRAXAS2,CNOT1,TMOD1,PRKAR1A,SBDS,KAT2A,MSN,LSM3,CSRP3,IL5,SH3PXD2B,TTN,EZR,KIF23,CFLAR,G3BP2,RPL5,RACGAP1
secretion	205	450	1.3	0.039	0.00151314	NADK,TGFB1,NPPA,ADCYAP1,PLA2G5,MICAL1,JAK2,PLA2G10,PLA2G2C,SAA1,COMP,EDN1,SVBP,RAB7A,SFRP1,NTRK2,TGFB3,FER,RAB11A,SNX5,KIT,RAB1A,PAX8,RAB21,LYN,PDIA4,BTK,PRKCB,HGS,CAVIN1,SERPINE2,RAB11FIP3,SLC9A3R1,SYTL4,GOLPH3L,INHBB,GLUL,SNCG,IL4,BMP2,SNX4,PLEK,RAB3D,SYK,RAB3C,SNF8,RAC2,RAB5A,PDPK1,HADH,AGT,CBL,MAP2K6,NRXN1,GJA1,TSG101,PTPN11,PLA2G12A,GDF9,GDNF,ARFIP1,FURIN,GRK2,PLA2G2A,GSK3B,PICK1,SMAD2,FKBP1…
regulation of anatomical structure morphogenesis	220	486	1.3	0.039	0.00153192	AP1AR,TGFB1,LST1,EFNB3,MDK,CSF1,ARHGDIA,PTN,WARS1,KEL,EDN1,ROCK2,THBS4,ILK,SFRP1,DBNL,PLXNA4,GPNMB,NTRK2,PRKCA,RAB11A,DCC,OLFM4,RSPO2,KIT,PTK2B,PAX8,RHOC,RAB21,ADAM12,AKT3,PRKCB,HRG,HGS,SEMA3B,RRAS,DAB2,ANGPTL4,YWHAH,CXCL10,FLNA,ECM1,SLC9A3R1,MYL12A,L1CAM,ITGA5,ADAMTS1,SMURF1,GLUL,VIL1,BMP2,RASA1,PGK1,ROBO2,CMA1,CTNNB1,MYL12B,RAC2,HGF,PDPK1,LRRC4C,MINAR1,SRC,STIM1,CDH5,SPHK1,CASS4,FGF8,ERBB2,AGT,…
cellular modified amino acid metabolic process	52	96	1.9	0.039	0.00153977	SOD1,PLA2G10,ABHD12,HPGDS,PAX8,AHCY,ARL6IP5,MTHFS,CLIC3,AASDHPPT,CRAT,CLIC1,GPX1,SHMT2,TPO,CROT,ACADM,GSTK1,GSTM3,CPQ,CGA,MTHFD1,GOT2,DHFR,GSTM5,GSTM4,MED1,PCYOX1,PTGES2,GSTP1,GCH1,ALDH7A1,GSS,MTHFD2L,HAGH,CHAC1,CTSB,G6PD,EEF1G,GATM,IDH1,PARK7,GSTA1,ATIC,PLOD2,VNN2,GLO1,SHMT1,GSTZ1,MTHFD2,CKMT1A,GCLM
response to oxygen-containing compound	353	809	1.3	0.04	0.00158116	NADK,PRKCZ,CLEC7A,BSG,TNFSF10,TGFB1,NPPA,VIM,SOD1,H2AZ1,ADCYAP1,AHSG,MPO,CTSG,PTN,JAK2,PON1,MAP2K4,HDAC6,LTA,EDN1,ROCK2,PRKACA,SFRP1,PPIF,CSK,NTRK2,TGFB3,PRKCA,FER,SNX5,ZFAND1,DNM1,PTK2B,STK24,IP6K2,ARPC1B,LYN,BTK,STAT6,PRKCB,MMP12,JAG1,PIM1,NME2,CDK2,KAT5,RGS10,CXCL10,GRAMD1C,FLNA,SLC9A3R1,AGRN,EIF4E,INHBB,PENK,MAPK8,MGMT,GLUL,SRSF6,GRB2,INSR,MAPK3,GSK3A,BCL2,CMA1,CD36,CTNNB1,AHCYL1,HGF,PDPK1,GN…
substrate adhesion-dependent cell spreading	36	62	2.2	0.041	0.00160565	AP1AR,MDK,FERMT3,ILK,ITGAV,FER,OLFM4,RAB1A,ANTXR1,FLNA,ATRN,SRC,CASS4,DNM2,POSTN,GBP1,UNC13D,DMTN,ARPC2,CIB1,APOA1,RAC1,RHOA,ABL1,ACTN4,CDC42,MYOC,CRK,CRKL,MERTK,FN1,RAC3,NTN4,ITGB7,EPHA1,EFNA1
positive regulation of response to stimulus	458	1068	1.2	0.041	0.0016337	PRKCZ,CLEC7A,CD4,TNFSF10,TGFB1,NPPA,SOD1,RUVBL1,ADCYAP1,MDK,PLA2G5,CSF1,ZBP1,None,FGFBP3,CTSG,PTN,BMP10,EDA2R,JAK2,BLNK,HDAC6,NETO1,CCL27,FGFR3,LTA,PLG,EDN1,ROCK2,THBS4,IL12RB1,ILK,ITGAV,SFRP1,CSK,GPNMB,NTRK2,TGFB3,PRKCA,VSIG4,SNX5,RSPO2,KIT,PTK2B,RHOC,IFNL2,LYN,BTK,STAT6,AKT3,XCL1,PRKCB,MMP12,JAG1,HRG,ARL6IP5,IFNL1,DAB2,TBK1,TNKS,CXCL10,FLNA,FGFBP1,ECM1,SLC9A3R1,ATP6V1C2,INHBB,PENK,ITGA5,MGMT,CS…
organonitrogen compound catabolic process	279	629	1.3	0.042	0.00165755	ISG15,PSMA2,TGFB1,PLA2G5,UPP1,CTSF,PLA2G10,ABHD12,HDAC6,PRKACA,PGLYRP2,RAB7A,KLHL3,PDE5A,SNX5,ANAPC7,ANAPC10,PTK2B,UBA7,IVD,AHCY,MMP12,HGS,CDK2,NT5C,NPLOC4,DAB2,KAT5,TOLLIP,PSMA1,SERPINE2,OPHN1,FLNA,SMURF1,GLUL,MTHFS,XPNPEP1,GSK3A,DERL1,FAP,USP4,CTNNB1,SNF8,SNX12,STUB1,HSPA1A,SPHK1,UBE2D1,TRIM40,ATE1,CBL,GJA1,TSG101,HMOX2,AKT1,FURIN,UBXN4,MAPK9,FAF2,SIRT2,GGA1,HPSE,TNFAIP3,MANBA,GPX1,UBE2K,WWP1,G…
positive regulation of cell migration	155	332	1.4	0.042	0.00167453	CLEC7A,TGFB1,MDK,CSF1,None,PTN,JAK2,HDAC6,CCL27,FERMT3,EDN1,ROCK2,ITGA2B,THBS4,ILK,ITGAV,GPNMB,LRRC15,PRKCA,FER,RAB11A,KIT,PTK2B,CEP43,RHOC,LYN,SERPINB3,AKT3,XCL1,SEMA3B,RRAS,DAB2,CXCL10,FLNA,FGFBP1,ADAMTS1,VIL1,IL4,BMP2,INSR,MAPK3,BCL2,RAC2,HGF,PDPK1,SRC,CDH5,SPHK1,CASS4,AGT,CSF1R,PTGS2,AKT1,ZC3H12A,ZNF580,SEMA4G,CCL7,MCAM,AKT2,BMP4,HSPB1,POSTN,PYCARD,PFN1,IGF1R,FLT1,NUMB,SMAD3,STK4,DMTN,PECAM1,…
negative regulation of cellular catabolic process	61	116	1.8	0.042	0.00167835	OPHN1,GSK3A,BCL2,MAGEA6,HGF,CIRBP,IL10RA,GDNF,AKT1,FURIN,SIRT2,CPTP,MAPKAPK2,PIK3CA,EIF4G2,MCL1,GIPC1,STAT3,UCHL5,TIMP1,EPHA4,PDCL3,CSNK2A1,TIRAP,SHH,PML,MGAT3,HNRNPA0,SCFD1,DDRGK1,HMOX1,YBX1,SGTA,SYNCRIP,CSNK2A2,PIK3CG,CAMLG,BAG6,TREM2,EIF4G1,SNCA,GABARAPL2,USP14,TIMP2,STYX,FHIT,FMR1,MAPK14,ALAD,TIMP4,ANXA2,PARK7,CST3,HP,CTSA,UBQLN4,RPL5,EFNA1,LEP,TIMP3,CHMP4A
cellular protein catabolic process	163	351	1.4	0.042	0.00170546	ISG15,PSMA2,CTSF,HDAC6,PRKACA,RAB7A,KLHL3,SNX5,ANAPC7,ANAPC10,PTK2B,UBA7,CDK2,NPLOC4,DAB2,KAT5,TOLLIP,PSMA1,OPHN1,SMURF1,GSK3A,DERL1,FAP,USP4,CTNNB1,SNF8,STUB1,HSPA1A,UBE2D1,ATE1,CBL,TSG101,AKT1,FURIN,UBXN4,MAPK9,FAF2,SIRT2,TNFAIP3,GPX1,UBE2K,WWP1,GSK3B,PSMB4,UBE2N,UBA6,CEBPA,USP8,USP12,UFD1,ASCC2,GIPC1,ARRB1,PSMD6,HAMP,KCTD10,NEDD8,VCP,UBA1,UBE2D4,UBE2I,CUL4B,NKD2,PSMD11,VPS4A,UBL7,DNAJC10,SMURF…
regulation of response to stimulus	744	1784	1.2	0.043	0.00173266	ISG15,SFRP5,PRKCZ,CLEC7A,CD4,TNFSF10,TGFB1,NPPA,SOD1,RUVBL1,ADCYAP1,MDK,PLA2G5,CSF1,ARHGDIA,AHSG,ZBP1,None,FGFBP3,CTSG,PTN,BMP10,KNG1,EDA2R,FCGR1A,CLEC4G,RGS5,JAK2,BLNK,MAP2K4,ABHD12,HDAC6,NETO1,SAA1,CCL27,FGFR3,LTA,PLG,WFIKKN1,EDN1,ROCK2,PRKACA,THBS4,IL12RB1,PGLYRP2,ILK,RAB7A,ITGAV,SFRP1,PPIF,CSK,PLXNA4,GPNMB,NTRK2,CRIM1,TGFB3,PRKCA,FER,VSIG4,SNX5,DNM1,RSPO2,KIT,PTK2B,UBASH3B,STK24,FAM3A,RHOC,IF…
peptidyl-serine phosphorylation	89	179	1.6	0.043	0.00174232	PRKCZ,TCL1B,TGFB1,HDAC6,ROCK2,PRKACA,ILK,NTRK2,PRKCA,VRK1,AKT3,PRKCB,INPP5F,CDK2,TBK1,TNKS,MAPK8,CSNK1G1,IFNB1,MAPK3,GSK3A,BCL2,SYK,IFNW1,HGF,PDPK1,SRC,NCK2,RPS6KB1,PTGS2,AKT1,IFNA4,GRK2,MAPK9,AKT2,GSK3B,PRKAA2,MAPKAPK2,MAPKAPK3,PIK3CA,BCAR3,STK4,CSNK1G2,TOP1,DMTN,BDNF,RPS6KA3,HMGA2,MKNK1,CNOT9,MAPK1,CALCR,CSNK2A1,RPS6KA6,RIPK1,HAX1,VEGFA,RAF1,NTF4,ARAF,PRKCQ,BAG4,CAMK2D,CAB39,CSNK2A2,MIF,ERN1,MA…
mitochondrial gene expression	19	28	3.3	0.043	0.00174788	MRPS14,WARS2,HARS1,DARS2,SHMT2,TFAM,MRPL12,MTIF3,TFB1M,TACO1,HSD17B10,TFB2M,SARS2,GARS1,CHCHD10,PNPT1,PUS1,FOXO3,TRMT61B
mitotic cell cycle process	122	255	1.5	0.043	0.00175166	CCNA1,PRC1,CHMP1A,EDN1,ROCK2,GPNMB,PRKCA,RAB11A,ID2,ANAPC7,CTDSP1,ZWINT,VRK1,RHOC,CHMP2B,PRKCB,CDK2,TNKS,FLNA,EIF4E,CTDSPL,CHMP1B,ADAMTS1,RASA1,INSR,BCL2,MITD1,HSPA1A,RPS6KB1,CCNE1,SPHK1,CRADD,FGF8,TMOD3,GJA1,NAA10,AKT1,DNM2,PTPN6,CDKN2D,SIRT2,SPAST,TBCE,PLCB1,BMP4,PPP1R9B,KPNB1,USP8,DCTN6,NAE1,PPP3CA,ENSA,PIN1,SYF2,CCNA2,VCP,UBE2I,NAA50,MAD2L1BP,CUL4B,DRG1,HMGA2,VPS4A,SETMAR,ARL3,AIF1,GNAI1,RHOA…
cellular lipid catabolic process	55	103	1.8	0.043	0.00176868	PLA2G5,PLA2G10,ABHD12,IVD,INPP5F,CRAT,ACOX1,SPHK1,HADH,AKT1,SLC27A2,GPCPD1,DECR1,SIRT2,AKT2,SCP2,CROT,HSD17B4,ACADM,PLCG2,APOA1,GBA3,ABHD5,PLA2G7,LIPG,ACADVL,LPL,MCEE,PLA2G4A,ECHS1,ACOT8,PLBD1,ENPP2,HEXB,HSD17B10,SMPD1,ECI2,PIK3CG,DECR2,DDHD2,LPIN1,AKR1B10,ECH1,PPARA,GCDH,IDH1,ADIPOQ,PRDX6,ECHDC1,ACAT1,APOA4,ECI1,CEL,LEP,LRP1
establishment of protein localization to vacuole	13	17	5.1	0.044	0.00181856	RAB7A,HGS,SCARB2,SMURF1,SNF8,TNFAIP3,NAGPA,GGA3,VPS4A,VPS28,VPS25,HSPA8,RNF215
regulation of fatty acid transport	13	17	5.1	0.044	0.00181856	PLA2G10,EDN1,SYK,MAP2K6,AKT1,AKT2,PLA2R1,FIS1,PLA2G4A,ATP5PF,IL1B,PPARA,FABP3
regulation of signal transduction	570	1348	1.2	0.044	0.00184593	ISG15,SFRP5,PRKCZ,CLEC7A,CD4,TNFSF10,TGFB1,NPPA,SOD1,RUVBL1,ADCYAP1,MDK,PLA2G5,CSF1,ARHGDIA,AHSG,ZBP1,None,FGFBP3,BMP10,EDA2R,RGS5,JAK2,HDAC6,NETO1,FGFR3,WFIKKN1,EDN1,ROCK2,PRKACA,ILK,RAB7A,ITGAV,SFRP1,PPIF,CSK,GPNMB,NTRK2,CRIM1,TGFB3,PRKCA,FER,SNX5,DNM1,RSPO2,KIT,PTK2B,UBASH3B,RHOC,LYN,SERPINB3,AKT3,XCL1,PRKCB,INPP5F,MMP12,JAG1,HRG,HGS,OAS1,ARL6IP5,IFNL1,NPLOC4,RRAS,DAB2,RGS10,TBK1,TNKS,SERPINE2…
protein targeting	63	121	1.7	0.046	0.00195886	RAB7A,NUCB1,ZDHHC4,HGS,SCARB2,SMURF1,GSK3A,RAC2,SSR2,ERBB2,ARL6IP1,YWHAZ,GET3,YWHAG,AKT2,TIMM10B,FYN,NAGPA,MICALL1,DMTN,FUT10,GIPC1,CIB1,TIMM10,GGA3,RNF31,SAMM50,VPS4A,TIMM8A,NACA,UBE2D3,RAB8B,HAX1,FIS1,HSPD1,UBL5,TIMM50,GABARAP,BAG4,TOMM20,SGTA,PEX14,CSNK2A2,YWHAB,CDC37,AIFM1,HSPA8,MIEF1,ABLIM3,BID,CACNB3,IMMP2L,ATP5IF1,HSPA5,HTRA2,PRKCI,NCF1,GDI1,RNF215,SRP19,CHMP4A,BCAP31,HSPA1L
ribonucleoside triphosphate biosynthetic process	22	34	2.9	0.046	0.00197068	TGFB1,NME2,IL4,PID1,ATP5PO,NME4,VCP,NME7,STAT3,UCK1,CTPS1,PKLR,ENO1,ATP5F1B,NUDT2,ATP5PF,TREM2,PPARA,NME1,IMPDH1,VPS9D1,ALDOA
regulation of protein polymerization	53	99	1.8	0.046	0.00197336	AP1AR,DBNL,VASP,FER,PTK2B,ARPC1B,CAPZA1,MAPRE3,ARFIP2,MAPRE1,VIL1,ARPC3,GRB2,RASA1,HSPA1A,WAS,NCK2,CDH5,TMOD3,GMFG,ARFIP1,GMFB,PYCARD,PFN1,PICK1,DMTN,ARPC2,FLII,RAC1,DRG1,ARL3,ARPC5,RHOA,TWF2,ABL1,HAX1,GSN,ADD2,TMOD2,CCL26,BAG4,HSPA1B,TWF1,EVL,ARF1,TMOD1,SNCA,CAPG,ESAM,TPPP3,SLIT2,HCLS1,RDX,CSF3
cell migration	337	772	1.3	0.046	0.00197344	PRKCZ,CLEC7A,BSG,TGFB1,GFRA3,MDK,CSF1,ARHGDIA,None,PTN,BMP10,JAK2,HDAC6,SAA1,CCL27,CHST4,BIN2,FERMT3,FGF22,EDN1,ROCK2,SVBP,ITGA2B,THBS4,ILK,ITGAV,SFRP1,PLXNA4,GPNMB,LRRC15,NTRK2,PRKCA,FER,RAB11A,DCC,LCP1,PDLIM1,KIT,PTK2B,STK24,RAB1A,CEP43,RHOC,LYN,SERPINB3,AKT3,XCL1,FGF3,MMP12,JAG1,HRG,SEMA3B,RRAS,DAB2,SERPINE2,CXCL10,OPHN1,FLNA,FGFBP1,ECM1,SLC9A3R1,L1CAM,ITGA5,ADAMTS1,GLUL,MAPRE1,ATRN,VIL1,ITGA1…
cellular response to endogenous stimulus	287	650	1.3	0.046	0.00197541	SFRP5,PRKCZ,TGFB1,VIM,SOD1,ADCYAP1,AHSG,None,FGFBP3,PTN,BMP10,GALNT3,JAK2,HDAC6,COMP,FGFR3,WFIKKN1,FGF22,SPINT1,EDN1,ROCK2,PRKACA,ILK,SFRP1,CSK,NTRK2,CRIM1,TGFB3,FER,SNX5,KIT,PAX8,LYN,STAT6,XCL1,PRKCB,FGF3,DAB2,YWHAH,CLEC3B,FLNA,FGFBP1,SLC9A3R1,EIF4E,INHBB,PENK,SMURF1,VIL1,SMAD5,ARPC3,IL4,GRB2,BMP2,INSR,PAGR1,MAPK3,GSK3A,FGF5,ROBO2,CD36,CTNNB1,AHCYL1,STUB1,PDPK1,HSPA1A,GNAI3,KLB,SRC,CDH5,RPS6KB1,…
purine nucleoside triphosphate metabolic process	28	46	2.5	0.046	0.00198012	TGFB1,NME2,IL4,GNAI3,PID1,ATP5PO,NME4,VCP,NME7,STAT3,NUDT15,RHOA,PKLR,ENO1,RHOQ,ATP5F1B,NUDT2,ATP5PF,RAN,GUK1,TREM2,PPARA,RAB23,ITPA,NME1,IMPDH1,VPS9D1,ALDOA
muscle hypertrophy	28	46	2.5	0.046	0.00198012	NPPA,BMP10,MAP2K4,EDN1,ROCK2,PRKCA,INPP5F,GSK3A,AGT,PDLIM5,SMAD4,SMAD3,PPP3CA,PIN1,HAMP,MYOC,CAMK2D,TWF1,G6PD,CSRP3,TNFRSF1B,IGFBP5,PPARA,HDAC2,TTN,GLRX3,LEP,TNFRSF1A
regulation of cellular response to oxidative stress	28	46	2.5	0.046	0.00198012	SOD1,HDAC6,CD36,CTNNB1,HGF,AKT1,GPX1,HSPB1,FYN,ALOX5,MCL1,NCOA7,PAWR,RIPK1,FBLN5,DHFR,PPIA,BMP7,NONO,LANCL1,GCH1,TREM2,FOXO3,HTRA2,PARK7,GPR37,RACK1,TLR4
regulation of cell motility	242	541	1.3	0.046	0.00198299	CLEC7A,AP1AR,TGFB1,MDK,CSF1,ARHGDIA,None,PTN,BMP10,JAK2,HDAC6,CCL27,CHST4,FERMT3,FGF22,EDN1,ROCK2,SVBP,ITGA2B,THBS4,ILK,ITGAV,SFRP1,PLXNA4,GPNMB,LRRC15,PRKCA,FER,RAB11A,KIT,PTK2B,STK24,CEP43,RHOC,LYN,SERPINB3,AKT3,XCL1,INPP5F,FGF3,JAG1,HRG,SEMA3B,RRAS,DAB2,CAVIN1,SERPINE2,CXCL10,FLNA,FGFBP1,ECM1,SLC9A3R1,ADAMTS1,GLUL,VIL1,IL4,BMP2,INSR,MAPK3,FGF5,BCL2,RAC2,HGF,PDPK1,CHST2,SRC,WAS,CDH5,SPHK1,CASS4…
neuron projection regeneration	27	44	2.5	0.046	0.00200577	PTN,JAK2,STK24,INPP5F,FLNA,GAP43,BCL2,HGF,NEFL,FKBP1B,RTN4RL1,KLK8,CTNNA1,APOA1,CHL1,EPHA4,DHFR,APOD,PTEN,OMG,GRN,TNC,RTN4R,MAP2K1,NDEL1,SPP1,LRP1
regulation of plasma lipoprotein particle levels	27	44	2.5	0.046	0.00200577	PLA2G5,MPO,PLA2G10,CES3,PRKACA,CSK,CD36,LDLRAP1,AGT,PLA2G2A,KHSRP,CETP,APOA1,HNRNPK,PLA2G7,EHD1,LIPG,LPL,HMOX1,APOM,PCSK9,PLTP,ARF1,TREM2,ADIPOQ,ANXA2,APOA4
cell adhesion	374	863	1.2	0.046	0.00201692	CDON,PRKCZ,AP1AR,BSG,CD4,TGFB1,ADAMDEC1,EFNB3,SIGLEC11,MDK,CSF1,ARHGDIA,None,PTN,BMP10,KNG1,CLEC4G,JAK2,SAA1,CHST4,COMP,FERMT3,PLG,ROCK2,ITGA2B,THBS4,IL12RB1,ILK,ITGAV,SFRP1,ICAM3,CSK,PLXNA4,GPNMB,PRKCA,FER,VSIG4,IGSF9B,ADAM23,PDLIM1,OLFM4,KIT,PTK2B,UBASH3B,TNXB,RAB1A,CSRP1,LYN,ADAM22,MYL9,ADAM12,XCL1,CNTN4,MMP12,JAG1,ANTXR1,HRG,NME2,CLSTN3,ICAM2,IFNL1,RRAS,THBS3,SCARF2,SERPINE2,ARHGAP6,FLNA,CNTN…
gene silencing by miRNA	26	42	2.6	0.046	0.00202282	TGFB1,DDX6,ZC3H12A,BMP4,SMAD2,SMAD3,RBM4,PPP3CA,LIMD1,STAT3,FXR1,RIPK1,SMAD1,HNRNPA2B1,TIAL1,RAN,CNOT1,AGO1,EIF4G1,FMR1,MAP2K1,BCDIN3D,IL6,MAP2K2,PRKRA,AGO2
regulation of sodium ion transport	24	38	2.7	0.046	0.00202461	NETO1,SNTA1,YWHAH,SERPINE2,SLC9A3R1,CNTN1,AHCYL1,ATP1B2,AKT1,DNM2,SLMAP,ATP1B1,FGF12,ACTN4,PCSK9,CAMK2D,ARF1,GPD1L,SCN2B,TESC,FXYD6,WNK3,WNK1,COMMD1
positive regulation of defense response	86	173	1.6	0.047	0.00208217	CLEC7A,NPPA,MDK,PLA2G5,ZBP1,JAK2,LTA,LYN,BTK,MMP12,TBK1,PENK,IFNB1,MAPK3,SNX4,SYK,SRC,AGT,NLRP10,GJA1,IL1RL1,PTGS2,PLA2G2A,IRF3,UBE2K,VAV1,PYCARD,FYN,CEBPA,PLCG2,IFI16,TRADD,TGM2,MNDA,PLA2G7,CD1D,HEXIM1,SPI1,TIRAP,LBP,XRCC6,HLA-G,RIPK1,LPL,S100A12,KARS1,HSPD1,PSPC1,KLK7,LILRA5,CADM1,CD28,MED1,CREBBP,NONO,CCL5,KIR2DS2,PIK3CG,KLK3,HAVCR2,TREM2,IL18,CCL1,S100A9,GRN,SNCA,IL1B,IL15,IL12B,CRTAM,LRSAM1,…
regulation of supramolecular fiber organization	86	173	1.6	0.047	0.00208217	AP1AR,BMP10,HDAC6,EDN1,ROCK2,SFRP1,DBNL,VASP,TGFB3,FER,FHOD1,PTK2B,DSTN,ARPC1B,RHOC,CAPZA1,MAPRE3,ARHGAP6,FLNA,ARFIP2,MAPRE1,VIL1,ARPC3,NAA80,GRB2,RASA1,PLEK,HSPA1A,WAS,NCK2,CDH5,TMOD3,GMFG,ARFIP1,SPAST,F11R,GPX1,GMFB,PYCARD,PFN1,PICK1,PIK3CA,SMAD4,SMAD3,DMTN,ARPC2,CIB1,FLII,APOA1,RAC1,DRG1,ARL3,ARPC5,RHOA,TWF2,PPFIA1,ABL1,HAX1,GSN,ADD2,CDC42,TMOD2,CCL26,BAG4,HSPA1B,MYOC,TWF1,IAPP,EVL,ARF1,PPM1F,…
axon development	122	256	1.5	0.047	0.00208919	CRTAC1,BSG,GFRA3,EFNB3,PTN,JAK2,PLA2G10,KEL,HDAC6,SVBP,ILK,DBNL,PLXNA4,NTRK2,VASP,RAB11A,DCC,STK24,RAB21,CNTN4,INPP5F,SEMA3B,EPHA10,OPHN1,FLNA,L1CAM,NECTIN1,GAP43,BCL2,ROBO2,RAC2,LRRC4C,ENAH,EPHA6,FGF8,ERBB2,CASP3,PLXNA1,CRABP2,NTN1,NRXN1,NEFL,ROBO3,PTPN11,PLXNC1,GDNF,DNM2,SPAST,SEMA4G,CNTN6,GSK3B,FYN,ISLR2,FKBP1B,SMAD4,NUMB,RTN4RL1,KLK8,B4GALT6,BDNF,EIF4G2,RAB3A,SEMA6D,CTNNA1,IST1,APOA1,RAC1,ANO…
regulation of response to stress	297	675	1.3	0.047	0.00212207	ISG15,CLEC7A,NPPA,SOD1,ADCYAP1,MDK,PLA2G5,AHSG,ZBP1,PTN,BMP10,KNG1,EDA2R,JAK2,ABHD12,HDAC6,SAA1,LTA,PLG,EDN1,ROCK2,IL12RB1,PGLYRP2,SFRP1,VSIG4,PTK2B,UBASH3B,STK24,FAM3A,LYN,BTK,SERPINB3,AKT3,XCL1,INPP5F,MMP12,HRG,OAS1,ARL6IP5,NPLOC4,IL22RA2,TBK1,SERPINE2,FLNA,PENK,MGMT,VIL1,SRSF6,IFNB1,IL4,BMP2,MAPK3,SNX4,BCL2,APCS,CMA1,SYK,CD36,FAP,CTNNB1,HGF,IER3,CST7,HSPA1A,SRC,WAS,NCK2,CDH5,ZYX,SPHK1,SERPING1…
regulation of growth	159	343	1.4	0.047	0.00212364	TGFB1,NPPA,SOD1,RUVBL1,CSF1,BMP10,FGFR3,EDN1,ILK,SFRP1,DBNL,PLXNA4,RAB11A,DCC,PTK2B,IP6K2,CEP43,RAB21,HRG,PIM1,CLSTN3,SEMA3B,HDGFL2,KAT5,SERPINE2,L1CAM,AGRN,SMURF1,ATRN,VIL1,INSR,GAP43,NUBP1,GSK3A,BCL2,HSPA1A,MINAR1,SPHK1,FGF8,ERBB2,TRIM40,AGT,CRABP2,NTN1,GJA1,TSG101,GDF9,AKT1,HOPX,DNM2,CDKN2D,TFCP2L1,SEMA4G,PLCB1,GSK3B,BMP4,PPP1R9B,PIK3CA,ISLR2,SMAD4,ADAM15,SMAD3,STK4,SYT17,BDNF,EIF4G2,PIN1,RPS6…
cellular response to peptide	89	180	1.6	0.048	0.00215482	PRKCZ,VIM,AHSG,JAK2,EDN1,ROCK2,CSK,FER,SNX5,LYN,STAT6,PRKCB,INHBB,GRB2,INSR,GSK3A,CD36,AHCYL1,PDPK1,SRC,RPS6KB1,AGT,MARS1,GJA1,PTPN11,AKT1,TNS2,PID1,YWHAG,AKT2,GSK3B,VWA2,PPP1R9B,FYN,PIK3CA,IGF1R,BCAR3,PIP4K2B,PIP4K2A,CCNA2,RAB13,APRT,GHR,STAT3,EPHA4,RAB8B,GRB10,PKLR,FIS1,LPL,LGMN,PRKCQ,RHOQ,HSF1,AKR1B1,PKM,PCSK9,NFKB1,MAX,GSTP1,USO1,STAT5A,PTEN,SHC1,CRK,TREM2,RAB31,IL1B,SYAP1,KL,GHRL,CSRP3,LPIN1…
negative regulation of catabolic process	74	146	1.6	0.048	0.00216527	SERPINE2,OPHN1,FLNA,GSK3A,BCL2,MAGEA6,SNX12,HGF,TRIM40,CIRBP,IL10RA,GDNF,AKT1,FURIN,SIRT2,CPTP,MAPKAPK2,FYN,PIK3CA,SMAD3,EIF4G2,MCL1,GIPC1,PIN1,STAT3,UCHL5,TIMP1,EPHA4,PDCL3,CSNK2A1,TIRAP,SHH,PML,MGAT3,HNRNPA0,SCFD1,DDRGK1,HMOX1,YBX1,SGTA,SYNCRIP,CSNK2A2,PIK3CG,CAMLG,BAG6,TREM2,EIF4G1,SNCA,GABARAPL2,USP14,IL1B,TIMP2,STYX,FHIT,FMR1,PPARA,MAPK14,RILP,ALAD,AGAP2,TIMP4,ANXA2,PARK7,CST3,HP,CTSA,UBQLN4…
regulation of cell-matrix adhesion	38	67	2.1	0.048	0.00217518	PRKCZ,CSF1,ROCK2,ILK,SFRP1,PTK2B,MMP12,JAG1,HRG,RRAS,ARHGAP6,RASA1,BCL2,CD36,SRC,PTPN11,GSK3B,POSTN,ADAM15,SMAD3,DUSP3,DMTN,CIB1,RAC1,RHOA,ABL1,DDR1,VEGFA,MYOC,APOD,PTEN,PPM1F,DAPK3,BCL6,EPHA1,VCL,SERPINE1,LRP1
regulation of protein localization to plasma membrane	38	67	2.1	0.048	0.00217518	TGFB1,CSK,LRRC15,RAB11A,DAB2,VIL1,PPP2R5A,GRIPAP1,LDLRAP1,PDPK1,RER1,MRAP,AKT1,PID1,PPP1R9B,STAC,NUMB,GBP1,CIB1,STX4,NKD2,VPS4A,BCL2L1,PPFIA1,STX7,RHOQ,VTI1B,MRAP2,TREM2,DPP10,CSRP3,WNK3,EZR,CNPY4,PRKCI,RACK1,STX8,LRP1
peptidyl-amino acid modification	289	656	1.3	0.049	0.00223553	PRKCZ,CLEC7A,TCL1B,CD4,TGFB1,RUVBL1,GALNT3,FCGR1A,PRDX4,JAK2,MAP2K4,HDAC6,FGFR3,ROCK2,SNTA1,PRKACA,THBS4,ILK,SFRP1,PPIF,CSK,NTRK2,PRKCA,FER,KIT,PTK2B,CEP43,VRK1,LYN,BTK,METAP1D,FKBP3,AKT3,PRKCB,INPP5F,ZDHHC4,HRG,NME2,CDK2,IFNL1,EPHA10,KAT5,TOLLIP,IL22RA2,TBK1,TNKS,CNTN1,MATK,MAPK8,ITGA5,CSNK1G1,NAA80,IFNB1,IL4,INSR,PAGR1,MAPK3,GSK3A,BCL2,RAB3D,SYK,CD36,CTNNB1,IFNW1,HGF,PDPK1,RBBP5,RPN2,SRC,NCK2,R…
positive regulation of protein metabolic process	333	764	1.3	0.052	0.00236541	PRKCZ,CLEC7A,TCL1B,CD4,TNFSF10,TGFB1,VIM,ADCYAP1,CSF1,BMP10,FCGR1A,JAK2,PLA2G10,MAP2K4,HDAC6,FGFR3,FGF22,EDN1,ROCK2,THBS4,ILK,RAB7A,CSK,GPNMB,NTRK2,TGFB3,KIT,PTK2B,RAB1A,LYN,SERPINB3,FGF3,MAPRE3,ANTXR1,ARL6IP5,IFNL1,DAB2,KAT5,TOLLIP,CLEC3B,TBK1,CNTN1,INHBB,MAPK8,ITGA5,SMURF1,IFNB1,IL4,BMP2,INSR,MAPK3,IL17D,GSK3A,FGF5,PPP2R5A,BCL2,DERL1,SYK,CD36,CTNNB1,SNF8,IFNW1,HGF,STUB1,PDPK1,HSPA1A,TANK,SRC,NC…
negative regulation of macromolecule metabolic process	470	1102	1.2	0.052	0.00237016	ISG15,PRKCZ,AP1AR,TGFB1,NPPA,VIM,AHSG,KNG1,MICAL1,CHMP1A,WARS1,HDAC6,ZNF10,WFIKKN1,SPINT1,EDN1,ROCK2,SNTA1,SVBP,PGLYRP2,ILK,ITGAV,SFRP1,CSK,GPNMB,NTRK2,CRIM1,TGFB3,PRKCA,VSIG4,ID2,CTDSP1,UBASH3B,PRKAR2B,CEP43,LYN,BTK,STAT6,SERPINB3,XCL1,INPP5F,MMP12,HRG,CDK2,OAS1,IFNL1,NPLOC4,DAB2,KAT5,TBK1,TNKS,SERPINE2,OPHN1,SRSF7,FLNA,ECM1,EIF4E,INHBB,CTDSPL,VIL1,SMAD5,SRSF6,IFNB1,IL4,BMP2,SERPINA3,ILF3,GSK3A,…
negative regulation of cellular amide metabolic process	43	78	2	0.053	0.00244201	ROCK2,NTRK2,EIF4E,ILF3,DDX6,SPHK1,CIRBP,ZC3H12A,KHSRP,EIF2S1,SHMT2,RBM4,PIN1,SAMD4B,GGA3,TIA1,CNOT9,STAT3,FXR1,DHFR,NCL,DAPK1,YBX1,SYNCRIP,CNOT1,PRG3,HNRNPR,AGO1,GZMB,DAPK3,EIF4G1,DCPS,PNPT1,SPON1,FMR1,EXOSC8,IGFBP5,FTO,PURA,RACK1,SHMT1,LSM1,AGO2
regulation of cell growth	110	229	1.5	0.053	0.00244995	TGFB1,NPPA,BMP10,EDN1,ILK,SFRP1,DBNL,PLXNA4,RAB11A,DCC,PTK2B,IP6K2,CEP43,RAB21,HRG,CLSTN3,SEMA3B,HDGFL2,SERPINE2,L1CAM,SMURF1,NUBP1,GSK3A,BCL2,HSPA1A,MINAR1,SPHK1,ERBB2,TRIM40,AGT,CRABP2,NTN1,GJA1,TSG101,GDF9,AKT1,DNM2,CDKN2D,SEMA4G,GSK3B,PPP1R9B,ISLR2,SMAD4,ADAM15,SMAD3,SYT17,BDNF,EIF4G2,PIN1,RPS6KA3,HAMP,CIB1,SEMA6D,N6AMT1,PAK4,FRZB,IST1,PPP2R1A,RHOA,TWF2,TGFB2,CSNK2A1,CDH4,ABL1,ENO1,PML,FBLN5,…
macromolecule catabolic process	252	567	1.3	0.053	0.00245645	ISG15,PSMA2,TGFB1,VIM,CTSF,ABHD12,HDAC6,ROCK2,PRKACA,PGLYRP2,RAB7A,KLHL3,PRKCA,SNX5,ANAPC7,ANAPC10,PYGB,PTK2B,UBA7,MMP12,HGS,CDK2,NPLOC4,DAB2,KAT5,TOLLIP,PSMA1,SERPINE2,OPHN1,FLNA,SMURF1,GSK3A,DERL1,FAP,USP4,CTNNB1,SNF8,SNX12,STUB1,HSPA1A,UBE2D1,TRIM40,ATE1,CBL,DNASE1L2,GJA1,CIRBP,TSG101,GDNF,AKT1,FURIN,UBXN4,ZC3H12A,MAPK9,FAF2,SIRT2,GGA1,HPSE,TNFAIP3,MANBA,GPX1,KHSRP,UBE2K,WWP1,GSK3B,PSMB4,MAPKA…
biological adhesion	376	870	1.2	0.053	0.00245895	CDON,PRKCZ,AP1AR,BSG,CD4,TGFB1,ADAMDEC1,EFNB3,SIGLEC11,MDK,CSF1,ARHGDIA,None,PTN,BMP10,KNG1,CLEC4G,JAK2,SAA1,CHST4,COMP,FERMT3,PLG,ROCK2,ITGA2B,THBS4,IL12RB1,ILK,ITGAV,SFRP1,ICAM3,CSK,PLXNA4,GPNMB,LRRC15,PRKCA,FER,VSIG4,IGSF9B,ADAM23,PDLIM1,OLFM4,KIT,PTK2B,UBASH3B,TNXB,RAB1A,CSRP1,LYN,ADAM22,MYL9,ADAM12,XCL1,CNTN4,MMP12,JAG1,ANTXR1,HRG,NME2,CLSTN3,ICAM2,IFNL1,RRAS,THBS3,SCARF2,SERPINE2,ARHGAP6,FL…
positive regulation of cell motility	159	344	1.4	0.053	0.00246344	CLEC7A,TGFB1,MDK,CSF1,None,PTN,JAK2,HDAC6,CCL27,FERMT3,EDN1,ROCK2,ITGA2B,THBS4,ILK,ITGAV,GPNMB,LRRC15,PRKCA,FER,RAB11A,KIT,PTK2B,CEP43,RHOC,LYN,SERPINB3,AKT3,XCL1,SEMA3B,RRAS,DAB2,CAVIN1,CXCL10,FLNA,FGFBP1,ADAMTS1,VIL1,IL4,BMP2,INSR,MAPK3,BCL2,RAC2,HGF,PDPK1,SRC,CDH5,SPHK1,CASS4,AGT,NTN1,CSF1R,PTGS2,AKT1,ZC3H12A,ZNF580,SEMA4G,CCL7,MCAM,AKT2,BMP4,HSPB1,POSTN,PYCARD,PFN1,IGF1R,FLT1,NUMB,SMAD3,STK4,…
mucosal immune response	15	21	4	0.053	0.00249596	H2BC21,H2BC12,IFNL2,XCL1,IL4,OTUD7B,RNASE2,DEFB1,DEFA3,DEFA1,APOA4,PIGR,RNASE3,PLA2G1B,BPIFB1
positive regulation of telomere maintenance	15	21	4	0.053	0.00249596	NEK7,TNKS,MAPK3,CTNNB1,CCT5,PNKP,MAPK1,CCT7,CCT8,PML,PRKCQ,HNRNPA2B1,TCP1,PPP1R10,MAPKAPK5
regulation of cell migration	230	514	1.3	0.053	0.002508	CLEC7A,TGFB1,MDK,CSF1,ARHGDIA,None,PTN,BMP10,JAK2,HDAC6,CCL27,CHST4,FERMT3,FGF22,EDN1,ROCK2,SVBP,ITGA2B,THBS4,ILK,ITGAV,SFRP1,PLXNA4,GPNMB,LRRC15,PRKCA,FER,RAB11A,KIT,PTK2B,STK24,CEP43,RHOC,LYN,SERPINB3,AKT3,XCL1,FGF3,JAG1,HRG,SEMA3B,RRAS,DAB2,SERPINE2,CXCL10,FLNA,FGFBP1,ECM1,SLC9A3R1,ADAMTS1,GLUL,VIL1,IL4,BMP2,INSR,MAPK3,FGF5,BCL2,RAC2,HGF,PDPK1,CHST2,SRC,CDH5,SPHK1,CASS4,FGF8,AGT,PLXNA1,NTN1,AT…
response to stress	753	1812	1.2	0.053	0.00253647	H2BC21,H2AW,H2BC12,ISG15,IL22RA1,PRKCZ,CLEC7A,CD4,TGFB1,NPPA,MX1,VIM,SOD1,LEAP2,RUVBL1,ADCYAP1,MDK,PLA2G5,CSF1,AHSG,MPO,UPP1,ZBP1,CTSG,PTN,BMP10,KNG1,EDA2R,ULBP1,FCGR1A,PRDX4,ASIC4,JAK2,PLA2G10,BLNK,MAP2K4,ABHD12,EVPL,HDAC6,SAA1,CHST4,COMP,LTA,ABCF3,FERMT3,PLG,EDN1,ROCK2,ITGA2B,PRKACA,THBS4,IL12RB1,PGLYRP2,ILK,SFRP1,PPIF,TGFB3,PRKCA,FER,VSIG4,ID2,PDLIM1,KIT,PTK2B,UBASH3B,STK24,FAM3A,RAB1A,UBA7,RH…
secretion by cell	177	387	1.4	0.053	0.00254594	NADK,TGFB1,NPPA,ADCYAP1,MICAL1,JAK2,PLA2G10,SAA1,COMP,EDN1,SVBP,RAB7A,SFRP1,NTRK2,TGFB3,FER,RAB11A,KIT,RAB1A,PAX8,RAB21,LYN,PDIA4,BTK,PRKCB,HGS,CAVIN1,SERPINE2,RAB11FIP3,SYTL4,GOLPH3L,INHBB,GLUL,SNCG,IL4,BMP2,SNX4,PLEK,RAB3D,SYK,RAB3C,SNF8,RAC2,RAB5A,PDPK1,HADH,AGT,CBL,MAP2K6,NRXN1,GJA1,TSG101,PTPN11,GDF9,GDNF,ARFIP1,FURIN,GRK2,GSK3B,PICK1,SMAD2,FKBP1B,NECAB3,SMAD4,GOLPH3,RHOT1,NAGPA,UNC13D,SYT17…
cell-matrix adhesion	67	131	1.7	0.054	0.00257731	PRKCZ,CSF1,FERMT3,ROCK2,ITGA2B,ILK,ITGAV,SFRP1,PTK2B,TNXB,MMP12,JAG1,HRG,RRAS,THBS3,ARHGAP6,L1CAM,ITGA11,DEFB118,RASA1,NID2,BCL2,CD36,CTNNB1,PDPK1,SRC,ZYX,PTPN11,HPSE,NID1,ACTN1,GSK3B,POSTN,TIMM10B,VWA2,ADAM15,SMAD3,DUSP3,COL13A1,DMTN,CIB1,RAC1,RHOA,PPFIA1,ABL1,EPDR1,FBLN5,DDR1,VEGFA,ITGAL,MYOC,APOD,PTEN,PPM1F,DAPK3,LYVE1,ADAM9,VCAM1,FN1,BCL6,ITGB7,EPHA1,VCL,SERPINE1,ITGA1,TMEM8B,LRP1
interleukin-8 production	33	57	2.2	0.055	0.00265113	CLEC7A,RAB1A,IL17D,SYK,HSPA1A,NLRP10,ZNF580,PYCARD,ANXA4,ARRB1,STAT3,TIRAP,LBP,ELANE,RIPK1,MAP2K5,OTUD7B,HSPA1B,CRP,F3,PRG3,LGALS9,IL1B,DDX58,CHI3L1,ADIPOQ,IL6,PARK7,CD33,BPI,SERPINE1,PLA2G1B,TLR4,LEP
regulation of interleukin-8 production	33	57	2.2	0.055	0.00265113	CLEC7A,RAB1A,IL17D,SYK,HSPA1A,NLRP10,ZNF580,PYCARD,ANXA4,ARRB1,STAT3,TIRAP,LBP,ELANE,RIPK1,MAP2K5,OTUD7B,HSPA1B,CRP,F3,PRG3,LGALS9,IL1B,DDX58,CHI3L1,ADIPOQ,IL6,PARK7,CD33,BPI,SERPINE1,PLA2G1B,TLR4,LEP
positive regulation of protein-containing complex assembly	62	120	1.7	0.056	0.00269213	ISG15,CLEC7A,AP1AR,TGFB1,WARS1,VASP,FER,LCP1,PTK2B,ARPC1B,RHOC,ARFIP2,MAPRE1,VIL1,ARPC3,GRB2,PLEK,SYK,CD36,STUB1,HSPA1A,SRC,WAS,NCK2,CDH5,GMFG,ARFIP1,MAPK9,GMFB,GSK3B,PYCARD,PFN1,PICK1,ARPC2,PLCG2,VCP,RAC1,DRG1,ARL3,ARPC5,CXCL13,RHOA,TIRAP,GSN,CDH17,CCL26,VEGFA,PIH1D1,BAG4,HRK,HSPA1B,EVL,ARF1,EIF4G1,SNCA,MSN,BID,IL5,TPPP3,PARK7,RACK1,TLR4,CSF3
organ or tissue specific immune response	16	23	3.6	0.056	0.00275425	H2BC21,H2BC12,IFNL2,XCL1,IL4,OTUD7B,RNASE2,DEFB1,DEFA3,DEFA1,IL6,APOA4,PIGR,RNASE3,PLA2G1B,BPIFB1
regulation of macrophage derived foam cell differentiation	16	23	3.6	0.056	0.00275425	PLA2G5,CSF1,PLA2G10,ITGAV,CD36,AGT,MAPK9,PLA2G2A,CETP,ALOX15B,LPL,NFKB1,CRP,IL18,PPARA,ADIPOQ
icosanoid secretion	16	23	3.6	0.056	0.00275425	PLA2G5,PLA2G10,PLA2G2C,EDN1,SYK,MAP2K6,PLA2G12A,PLA2G2A,PLA2R1,ACE,PLA2G4A,ATP5PF,IL1B,PLA2G12B,PLA2G1B,LEP
regulation of superoxide metabolic process	16	23	3.6	0.056	0.00275425	CLEC7A,TGFB1,SOD1,SYK,CD36,GNAI3,AGT,AKT1,FBLN5,DHFR,BMP7,CRP,GSTP1,GCH1,CD177,ACP5
regulation of cytoskeleton organization	114	239	1.5	0.056	0.00277908	AP1AR,MDK,ARHGDIA,BMP10,CHMP1A,HDAC6,CCL27,EDN1,ROCK2,ILK,SFRP1,DBNL,VASP,TGFB3,FER,FHOD1,PTK2B,DSTN,ARPC1B,RHOC,CHMP2B,CAPZA1,MAPRE3,HRG,ARHGAP6,FLNA,ARFIP2,CHMP1B,MAPRE1,VIL1,ARPC3,NAA80,GRB2,RASA1,MAPK3,NUBP1,PLEK,RAC2,HSPA1A,WAS,NCK2,CDH5,TMOD3,GMFG,CSF1R,ARFIP1,SPAST,F11R,GMFB,GSK3B,PRKAA2,ABL2,PYCARD,PFN1,PICK1,PIK3CA,SMAD4,SMAD3,DMTN,ARPC2,CIB1,FLII,APOA1,RAC1,DRG1,BICD1,ARL3,GNAI1,ARPC5,M…
positive regulation of cell communication	371	859	1.2	0.056	0.00278076	NADK,PRKCZ,CLEC7A,CD4,TNFSF10,TGFB1,NPPA,SOD1,RUVBL1,ADCYAP1,PLA2G5,CSF1,ZBP1,None,FGFBP3,PTN,BMP10,EDA2R,JAK2,NETO1,FGFR3,EDN1,ROCK2,ILK,ITGAV,SFRP1,CSK,GPNMB,NTRK2,TGFB3,PRKCA,SNX5,RSPO2,KIT,PTK2B,RHOC,LYN,NRGN,AKT3,XCL1,PRKCB,MMP12,JAG1,CLSTN3,ARL6IP5,IFNL1,DAB2,TBK1,TNKS,SERPINE2,FLNA,FGFBP1,ECM1,SLC9A3R1,ATP6V1C2,INHBB,ITGA5,GLUL,CSNK1G1,IFNB1,IL4,BMP2,INSR,PAGR1,MAPK3,GSK3A,SNX4,ROBO2,SYK,C…
regulation of locomotion	247	556	1.3	0.056	0.00278967	CLEC7A,AP1AR,TGFB1,MDK,CSF1,ARHGDIA,None,PTN,BMP10,JAK2,HDAC6,CCL27,CHST4,FERMT3,FGF22,EDN1,ROCK2,SVBP,ITGA2B,THBS4,ILK,ITGAV,SFRP1,PLXNA4,GPNMB,LRRC15,PRKCA,FER,RAB11A,KIT,PTK2B,STK24,CEP43,RHOC,LYN,SERPINB3,AKT3,XCL1,INPP5F,FGF3,JAG1,HRG,SEMA3B,RRAS,DAB2,CAVIN1,SERPINE2,CXCL10,FLNA,FGFBP1,ECM1,SLC9A3R1,ADAMTS1,GLUL,VIL1,IL4,BMP2,INSR,MAPK3,FGF5,BCL2,ROBO2,RAC2,HGF,PDPK1,CHST2,SRC,WAS,CDH5,SPHK1…
positive regulation of signaling	373	864	1.2	0.057	0.00280031	NADK,PRKCZ,CLEC7A,CD4,TNFSF10,TGFB1,NPPA,SOD1,RUVBL1,ADCYAP1,PLA2G5,CSF1,ZBP1,None,FGFBP3,PTN,BMP10,EDA2R,JAK2,NETO1,FGFR3,EDN1,ROCK2,ILK,ITGAV,SFRP1,CSK,GPNMB,NTRK2,TGFB3,PRKCA,SNX5,RSPO2,KIT,PTK2B,RHOC,LYN,NRGN,AKT3,XCL1,PRKCB,INPP5F,MMP12,JAG1,CLSTN3,ARL6IP5,IFNL1,DAB2,TBK1,TNKS,SERPINE2,FLNA,FGFBP1,ECM1,SLC9A3R1,ATP6V1C2,INHBB,ITGA5,GLUL,CSNK1G1,IFNB1,IL4,BMP2,INSR,PAGR1,MAPK3,GSK3A,SNX4,ROBO…
negative regulation of peptidase activity	88	179	1.5	0.057	0.00281297	AHSG,KNG1,MICAL1,WFIKKN1,SPINT1,CRIM1,SERPINB3,HRG,SERPINE2,ECM1,VIL1,SERPINA3,ITIH4,HGF,CST7,SRC,SERPING1,OPRPN,AGT,ARL6IP1,PTGS2,AKT1,FURIN,CDKN2D,GPX1,CR1,ITIH1,SERPINB13,ITIH2,RPS6KA3,IFI16,ANOS1,ITIH5,UCHL5,TIMP1,CD109,CSNK2A1,TFPI,C5,PAPLN,VEGFA,PRDX3,MAP2K5,CD27,RAF1,PIH1D1,CSTL1,SERPINH1,A2M,SERPINA1,SERPINB8,SERPINA10,ITIH3,BIRC2,TNFAIP8,SPINK5,SLPI,MMP9,SPINT2,IGBP1,SERPINA4,RARRES1,SNC…
regulation of cytokine-mediated signaling pathway	40	72	2	0.057	0.00282732	ISG15,CSF1,ZBP1,EDN1,MMP12,OAS1,TBK1,ECM1,SYK,HSPA1A,SPHK1,CPNE1,PTPN11,PTPN6,IRF3,TNFAIP3,UBE2K,PYCARD,C1QTNF4,APOA1,RIPK1,IL36RN,CYLD,SHARPIN,PIAS4,MED1,HSPA1B,ROBO1,IL1RN,CCL5,GSTP1,CDC37,TREM2,TTLL12,RFFL,IL1R1,IL1R2,IKBKB,ADIPOQ,IL6,SLIT2
muscle adaptation	31	53	2.2	0.057	0.0028407	NPPA,BMP10,EDN1,ROCK2,PRKCA,INPP5F,GSK3A,AGT,SMAD4,SMAD3,PPP3CA,PIN1,HAMP,AIF1,GSN,HMOX1,MYOC,CAMK2D,TWF1,CAMK2B,IL1B,IL15,G6PD,GATM,TNFRSF1B,IGFBP5,PPARA,FOXO3,CFLAR,GLRX3,TNFRSF1A
regulation of intracellular signal transduction	344	793	1.2	0.057	0.00288614	SFRP5,PRKCZ,CLEC7A,CD4,TNFSF10,TGFB1,NPPA,SOD1,ADCYAP1,PLA2G5,CSF1,ARHGDIA,None,EDA2R,JAK2,FGFR3,EDN1,ROCK2,ILK,ITGAV,SFRP1,PPIF,CSK,GPNMB,NTRK2,PRKCA,KIT,PTK2B,RHOC,LYN,SERPINB3,AKT3,XCL1,PRKCB,INPP5F,ARL6IP5,NPLOC4,RRAS,TBK1,SERPINE2,ARHGAP6,OPHN1,FLNA,ECM1,SLC9A3R1,ARHGAP45,GRB2,BMP2,RASA1,INSR,MAPK3,GSK3A,BCL2,PLEK,SYK,CD36,CTNNB1,HGF,VAPA,CD22,PDPK1,IKBKG,HSPA1A,MINAR1,KLB,TANK,SRC,NCK2,SPHK…
cellular response to external stimulus	84	170	1.6	0.058	0.00289996	NPPA,ARHGDIA,UPP1,TNFRSF8,PTN,MAP2K4,SFRP1,STK24,LYN,PIM1,TNKS,INHBB,PENK,MAPK8,GLUL,MAPK3,BCL2,CRADD,AGT,CBL,MARS1,GJA1,PTPN11,PTGS2,AKT1,ZC3H12A,F11R,EIF2S1,PRKAA2,ALB,TNFRSF10B,POSTN,PPP1R9B,PICK1,IMPACT,MAP1LC3B,IFI16,RAC1,RALB,AIF1,MAPK1,TBL2,NUDT15,BAD,GABARAPL1,LPL,ENG,HMOX1,GABARAP,CNN2,MKX,MED1,PCSK9,NFKB1,MAX,DCTPP1,ASNS,GSTP1,AIFM1,PIK3C3,HSPA8,EIF4G1,TNC,GABARAPL2,DCPS,IL1B,TNFRSF10A,…
innate immune response in mucosa	11	14	5.8	0.058	0.00294539	H2BC21,H2BC12,IL4,RNASE2,DEFB1,DEFA3,DEFA1,APOA4,RNASE3,PLA2G1B,BPIFB1
interleukin-6-mediated signaling pathway	11	14	5.8	0.058	0.00294539	JAK2,FER,SRC,CEBPA,SMAD4,C1QTNF4,STAT3,SPI1,RIPK1,YAP1,IL6
macrophage derived foam cell differentiation	17	25	3.4	0.058	0.00296062	TGFB1,PLA2G5,CSF1,PLA2G10,ITGAV,CD36,AGT,MAPK9,PLA2G2A,CETP,ALOX15B,LPL,NFKB1,CRP,IL18,PPARA,ADIPOQ
foam cell differentiation	17	25	3.4	0.058	0.00296062	TGFB1,PLA2G5,CSF1,PLA2G10,ITGAV,CD36,AGT,MAPK9,PLA2G2A,CETP,ALOX15B,LPL,NFKB1,CRP,IL18,PPARA,ADIPOQ
cell death in response to oxidative stress	29	49	2.3	0.058	0.00301982	SOD1,JAK2,HDAC6,STK24,ARL6IP5,BCL2,CTNNB1,HGF,AKT1,GPX1,HSPB1,FYN,MCL1,NCOA7,PAWR,RIPK1,PML,PPIA,DIABLO,NONO,LANCL1,PDK1,TREM2,FOXO3,HTRA2,PARK7,GPR37,RACK1,TLR4
transcription by RNA polymerase I	8	9	12.6	0.058	0.00303766	CAVIN1,FLNA,ERBB2,MARS1,POLR2K,NCL,PIH1D1,POLR1C
lipid droplet organization	8	9	12.6	0.058	0.00303766	PTGFRN,FAF2,RAB18,TBC1D20,PPIA,PPID,DDHD2,SPART
megakaryocyte development	8	9	12.6	0.058	0.00303766	KIT,MPIG6B,FLI1,PTPN11,PTPN6,PIP4K2A,MED1,THPO
ubiquitin-dependent protein catabolic process via the multivesicular body sorting pathway	8	9	12.6	0.058	0.00303766	HDAC6,SNF8,TSG101,VPS4A,VPS28,VPS4B,VPS25,MVB12B
positive regulation of oxidative stress-induced cell death	8	9	12.6	0.058	0.00303766	SOD1,HDAC6,MCL1,PAWR,RIPK1,FOXO3,PARK7,TLR4
negative regulation of cellular metabolic process	422	986	1.2	0.059	0.00306625	ISG15,PRKCZ,AP1AR,TGFB1,NPPA,AHSG,KNG1,MICAL1,CHMP1A,WARS1,HDAC6,ZNF10,WFIKKN1,SPINT1,EDN1,ROCK2,SNTA1,SVBP,ILK,ITGAV,SFRP1,PPIF,CSK,NTRK2,CRIM1,ID2,CTDSP1,UBASH3B,FAM3A,PRKAR2B,CEP43,LYN,STAT6,SERPINB3,XCL1,INPP5F,MMP12,HRG,IFNL1,DAB2,KAT5,TNKS,SERPINE2,OPHN1,SRSF7,FLNA,ECM1,EIF4E,CTDSPL,VIL1,SMAD5,SRSF6,IL4,BMP2,SERPINA3,ILF3,GSK3A,PPP2R5A,ITIH4,BCL2,PLEK,APCS,CD36,USP4,MAGEA6,DDX6,CTNNB1,SNX12…
response to insulin	68	134	1.6	0.059	0.00309096	PRKCZ,TNFSF10,NPPA,AHSG,FER,SNX5,LYN,PRKCB,INHBB,SRSF6,GRB2,INSR,GSK3A,PDPK1,SRC,RPS6KB1,HADH,AGT,MARS1,PTPN11,AKT1,TNS2,PID1,YWHAG,AKT2,GSK3B,VWA2,PIK3CA,CAT,IGF1R,BCAR3,PIP4K2B,PIP4K2A,RAB13,APRT,GHR,RAB8B,GRB10,GOT2,PKLR,LPL,PRKCQ,RHOQ,PKM,PCSK9,MAX,GSTP1,USO1,PTEN,SHC1,RAB31,IL1B,SYAP1,KL,CSRP3,LPIN1,SELENOS,NDEL1,PPARA,GPT,GAB1,FABP3,ADIPOQ,PRKCI,TRIM72,CFLAR,PLA2G1B,LEP
cytoplasmic translation	28	47	2.3	0.059	0.00310234	EIF4A1,AARS1,EIF3M,GSPT2,EIF4H,RWDD1,EIF4A2,RBM4,EIF2S2,DRG1,DPH2,EIF4B,RPS12,DPH5,EIF3B,EIF3G,PKM,RPS27A,EIF3J,EIF4G1,FMR1,MCTS1,RPS25,DENR,RPS10,RPL26L1,RPL5,EIF5
regulation of response to oxidative stress	28	47	2.3	0.059	0.00310234	SOD1,HDAC6,CD36,CTNNB1,HGF,AKT1,GPX1,HSPB1,FYN,ALOX5,MCL1,NCOA7,PAWR,RIPK1,FBLN5,DHFR,PPIA,BMP7,NONO,LANCL1,GCH1,TREM2,FOXO3,HTRA2,PARK7,GPR37,RACK1,TLR4
regulation of cell size	50	94	1.8	0.059	0.0031185	KEL,EDN1,ILK,DBNL,PLXNA4,RAB11A,DCC,RAB21,AKT3,SEMA3B,SLC9A3R1,L1CAM,PLEK,CRABP2,NTN1,AKT1,DNM2,SEMA4G,GSK3B,VAV1,ISLR2,BDNF,EIF4G2,AKT1S1,SEMA6D,IST1,RAC1,RHOA,TWF2,CDH4,ABL1,IL7R,VEGFA,PRR16,PTEN,RTN4R,MSN,SEMA3G,NDEL1,SPP1,SPART,WNK3,FN1,SEMA5B,ZFYVE27,GDI1,DPYSL2,SEMA4C,RDX,LRP1
p38MAPK cascade	18	27	3.2	0.059	0.00311919	BMP2,HGF,SPHK1,ZC3H12A,BMP4,MAPKAPK2,SPI1,VEGFA,CYLD,PRMT1,LGALS9,TREM2,IL1B,MAPK14,EZR,NCF1,MAP2K3,LEP
negative regulation of cytokine production	79	159	1.6	0.059	0.00315773	TGFB1,PGLYRP2,CSK,GPNMB,TGFB3,VSIG4,BTK,XCL1,OAS1,IFNL1,NPLOC4,KAT5,INHBB,IFNB1,IL4,HGF,IL1RL1,FURIN,ZC3H12A,PTPN6,TNFAIP3,CPTP,CR1,PYCARD,GBP1,HOMER2,UFD1,ANXA4,C1QTNF3,ARRB1,APOA1,RAC1,TIA1,NPTN,TGFB2,LBP,ELANE,VSIR,PML,IL36RN,CYLD,MAP2K5,HMOX1,LILRA5,OTUD7B,NFKB1,APOD,GSTP1,F2,HAVCR2,LGALS9,TREM2,CD2AP,CDH3,TNFRSF21,IL27RA,ACP5,GHRL,ARG2,MERTK,SELENOS,IL12B,PPARA,CARD18,SFTPD,INHA,IL1R2,SARS1,…
negative regulation of endopeptidase activity	86	175	1.5	0.059	0.00316728	AHSG,KNG1,MICAL1,WFIKKN1,SPINT1,CRIM1,SERPINB3,HRG,SERPINE2,VIL1,SERPINA3,ITIH4,HGF,CST7,SRC,SERPING1,OPRPN,AGT,ARL6IP1,PTGS2,AKT1,FURIN,CDKN2D,GPX1,CR1,ITIH1,SERPINB13,ITIH2,RPS6KA3,IFI16,ANOS1,ITIH5,UCHL5,TIMP1,CD109,CSNK2A1,TFPI,C5,PAPLN,VEGFA,PRDX3,MAP2K5,CD27,RAF1,PIH1D1,CSTL1,SERPINH1,A2M,SERPINA1,SERPINB8,SERPINA10,ITIH3,BIRC2,TNFAIP8,SPINK5,SLPI,MMP9,SPINT2,IGBP1,SERPINA4,RARRES1,SNCA,USP…
pyrimidine-containing compound metabolic process	27	45	2.4	0.059	0.00317805	UPP1,NME2,NT5C,DCTD,NME4,TK2,MBD4,ALDH6A1,NT5M,NME7,MAPK1,DTYMK,THTPA,NEIL1,UCK1,CTPS1,CMPK1,TBPL1,DCTPP1,RRM1,NT5C3A,UNG,APOBEC3G,TYMP,NME1,DPYS,APOBEC2
regulation of multicellular organismal process	550	1305	1.2	0.06	0.00320366	CELF2,ISG15,PRKCZ,CLEC7A,CD4,TGFB1,NPPA,EFNB3,SOD1,ADCYAP1,MDK,CSF1,AHSG,TNFRSF8,None,PTN,BMP10,KNG1,PRDX4,JAK2,WARS1,HDAC6,NETO1,SAA1,COMP,LTA,PLG,SPINT1,EDN1,ROCK2,SNTA1,SVBP,PRKACA,THBS4,IL12RB1,PGLYRP2,ILK,ITGAV,SFRP1,CSK,DBNL,PLXNA4,GPNMB,LUM,NTRK2,TGFB3,PRKCA,VSIG4,RAB11A,DCC,SNX5,ID2,RSPO2,KIT,CTDSP1,PTK2B,UBASH3B,RAB1A,PAX8,RAB21,LYN,BTK,STAT6,SERPINB3,MYL9,ADAM12,NAP1L1,AKT3,XCL1,PRKCB,I…
cardiac muscle hypertrophy	26	43	2.4	0.06	0.00324505	NPPA,BMP10,MAP2K4,EDN1,ROCK2,PRKCA,INPP5F,GSK3A,AGT,PDLIM5,SMAD4,SMAD3,PPP3CA,PIN1,HAMP,CAMK2D,TWF1,G6PD,CSRP3,TNFRSF1B,PPARA,HDAC2,TTN,GLRX3,LEP,TNFRSF1A
posttranscriptional gene silencing	26	43	2.4	0.06	0.00324505	TGFB1,DDX6,ZC3H12A,BMP4,SMAD2,SMAD3,RBM4,PPP3CA,LIMD1,STAT3,FXR1,RIPK1,SMAD1,HNRNPA2B1,TIAL1,RAN,CNOT1,AGO1,EIF4G1,FMR1,MAP2K1,BCDIN3D,IL6,MAP2K2,PRKRA,AGO2
post-transcriptional gene silencing by RNA	26	43	2.4	0.06	0.00324505	TGFB1,DDX6,ZC3H12A,BMP4,SMAD2,SMAD3,RBM4,PPP3CA,LIMD1,STAT3,FXR1,RIPK1,SMAD1,HNRNPA2B1,TIAL1,RAN,CNOT1,AGO1,EIF4G1,FMR1,MAP2K1,BCDIN3D,IL6,MAP2K2,PRKRA,AGO2
nucleoside triphosphate biosynthetic process	25	41	2.5	0.061	0.00330109	TGFB1,NME2,IL4,PID1,ATP5PO,NME4,VCP,NME7,STAT3,DTYMK,UCK1,CTPS1,PKLR,ENO1,CMPK1,TBPL1,ATP5F1B,NUDT2,ATP5PF,TREM2,PPARA,NME1,IMPDH1,VPS9D1,ALDOA
purine ribonucleoside triphosphate biosynthetic process	20	31	2.9	0.061	0.00331298	TGFB1,NME2,IL4,PID1,ATP5PO,NME4,VCP,NME7,STAT3,PKLR,ENO1,ATP5F1B,NUDT2,ATP5PF,TREM2,PPARA,NME1,IMPDH1,VPS9D1,ALDOA
cytoskeleton-dependent cytokinesis	24	39	2.5	0.061	0.00334362	CHMP1A,ROCK2,RHOC,CHMP2B,CHMP1B,RASA1,MITD1,SPAST,USP8,SEPTIN1,IST1,VPS4A,ARL3,RHOA,SEPTIN6,CHMP2A,VPS4B,STAMBP,ARF1,CHMP6,PDCD6IP,KIF23,RACGAP1,CHMP4A
peptidyl-serine modification	95	196	1.5	0.061	0.00336543	PRKCZ,TCL1B,TGFB1,GALNT3,HDAC6,ROCK2,PRKACA,ILK,NTRK2,PRKCA,VRK1,AKT3,PRKCB,INPP5F,CDK2,TBK1,TNKS,MAPK8,CSNK1G1,IFNB1,MAPK3,GSK3A,BCL2,SYK,IFNW1,HGF,PDPK1,SRC,NCK2,RPS6KB1,NAA10,DCN,PTGS2,AKT1,IFNA4,GRK2,MAPK9,AKT2,GSK3B,PRKAA2,MAPKAPK2,MAPKAPK3,PIK3CA,BCAR3,POGLUT1,STK4,CSNK1G2,TOP1,DMTN,BDNF,RPS6KA3,HMGA2,MKNK1,CNOT9,MAPK1,CALCR,CSNK2A1,RPS6KA6,RIPK1,HAX1,VEGFA,RAF1,NTF4,ARAF,PRKCQ,BAG4,POGLUT3…
formation of translation preinitiation complex	6	6	Inf	0.062	0.00342397	EIF4H,EIF2S2,EIF4B,MCTS1,DENR,EIF5
formation of cytoplasmic translation initiation complex	6	6	Inf	0.062	0.00342397	EIF3M,EIF2S2,EIF3B,EIF3G,EIF3J,EIF5
late endosome to vacuole transport via multivesicular body sorting pathway	6	6	Inf	0.062	0.00342397	SNF8,VTA1,VPS28,VPS25,CHMP6,CHMP4A
positive regulation of hydrolase activity	142	306	1.4	0.062	0.00343083	PRKCZ,CLEC7A,TNFSF10,ADCYAP1,PLA2G5,JAK2,FGFR3,ROCK2,SFRP1,KIT,PTK2B,RHOC,LYN,SERPINB3,XCL1,ANTXR1,ARL6IP5,RGS10,ARHGAP6,AGRN,MAPK8,ARHGAP45,ARF4,BMP2,RASA1,PLEK,SYK,PDPK1,HSPA1A,TANK,CRADD,ERBB2,AGT,ATP1B2,AKT1,CCL13,F11R,CCL22,CCL7,AKT2,CR1,GSK3B,ABL2,VAV1,PYCARD,PFN1,FYN,MTSS2,FLT1,SMAD3,BCAR3,PRTN3,ABR,ARHGAP25,TBC1D13,PIN1,ARRB1,TBC1D20,IFI16,VCP,FGFR1,APOA1,GBA3,ATP1B1,ABHD5,TGM2,DNAJC10,TN…
stress-activated protein kinase signaling cascade	70	139	1.6	0.062	0.0034644	CLEC7A,NPPA,EDA2R,MAP2K4,SFRP1,PTK2B,LYN,SERPINB3,ARL6IP5,MAPK8,BMP2,MAPK3,HGF,SPHK1,AGT,MAP2K6,AKT1,ZC3H12A,MAPK9,PLCB1,BMP4,MAPKAPK2,PYCARD,IGF1R,SMAD3,DUSP3,MAP3K11,CCM2,AIDA,FLT4,MAPK1,RHOA,TGFB2,SPI1,TIRAP,EDAR,FOXM1,RIPK1,CDC42,VEGFA,CYLD,PPIA,CD27,TRAF1,PRMT1,AKR1B1,COPS5,IRAK4,NFKB1,MAPK10,GSTP1,LGALS9,TREM2,IGBP1,CRKL,IL1B,FGF19,MAP2K1,MAPK14,IKBKB,STK3,EZR,LTBR,NCF1,MAP2K2,MAP2K3,MMP8,S…
protein polymerization	66	130	1.6	0.062	0.00348107	AP1AR,JAK2,DBNL,VASP,FER,PTK2B,ARPC1B,CAPZA1,MAPRE3,ARHGAP6,ARFIP2,MAPRE1,VIL1,ARPC3,GRB2,RASA1,HSPA1A,WAS,NCK2,CDH5,TMOD3,GMFG,NEFL,ARFIP1,GMFB,UBE2K,PYCARD,PFN1,PICK1,DMTN,ARPC2,FLII,RAC1,DRG1,ARL3,AIF1,ARPC5,RHOA,TWF2,CHMP2A,ABL1,HAX1,GSN,ADD2,TMOD2,CCL26,BAG4,HSPA1B,TWF1,EVL,ARF1,TMOD1,SNCA,CAPG,UBE2C,CATIP,HDGFL3,NDEL1,ESAM,TPPP3,UBE2S,SLIT2,HCLS1,RDX,DIAPH1,CHMP4A,CSF3
regulation of protein phosphorylation	270	614	1.3	0.063	0.00353245	PRKCZ,CLEC7A,TCL1B,CD4,TGFB1,NPPA,SOD1,CCNA1,ADCYAP1,CSF1,BMP10,MICAL1,FCGR1A,JAK2,WARS1,MAP2K4,HDAC6,FGFR3,FGF22,EDN1,ROCK2,THBS4,ILK,SFRP1,CSK,GPNMB,NTRK2,TGFB3,FER,KIT,CTDSP1,PTK2B,UBASH3B,TNXB,PRKAR2B,CEP43,LYN,SERPINB3,INPP5F,FGF3,MAPRE3,HRG,HGS,IFNL1,DAB2,IL22RA2,TBK1,SLC9A3R1,CNTN1,INHBB,CTDSPL,ITGA5,IFNB1,IL4,BMP2,INSR,MAPK3,GSK3A,FGF5,BCL2,SYK,CD36,IFNW1,HGF,PDPK1,SRC,NCK2,CDH5,CCNE1,SPH…
epidermal growth factor receptor signaling pathway	35	62	2.1	0.064	0.00356421	TGFB1,RAB7A,FER,SNX5,PTK2B,VIL1,ARF4,GRB2,PDPK1,SRC,NCK2,AGT,CBL,TSG101,PTPN11,AKT1,PIK3CA,BCAR3,DUSP3,CNOT9,ABL1,VPS25,EGF,MVP,BRAF,SHC1,CHMP6,MMP9,AREG,MVB12B,GAB1,BTC,NCF1,PIGR,ITGA1
positive regulation of cellular component movement	160	349	1.4	0.064	0.00359323	CLEC7A,TGFB1,MDK,CSF1,None,PTN,JAK2,HDAC6,CCL27,FERMT3,EDN1,ROCK2,ITGA2B,THBS4,ILK,ITGAV,GPNMB,LRRC15,PRKCA,FER,RAB11A,KIT,PTK2B,CEP43,RHOC,LYN,SERPINB3,AKT3,XCL1,SEMA3B,RRAS,DAB2,CAVIN1,CXCL10,FLNA,FGFBP1,ADAMTS1,VIL1,IL4,BMP2,INSR,MAPK3,BCL2,RAC2,HGF,PDPK1,SRC,CDH5,SPHK1,CASS4,AGT,NTN1,CSF1R,PTGS2,AKT1,ZC3H12A,ZNF580,SEMA4G,CCL7,MCAM,AKT2,BMP4,HSPB1,POSTN,PYCARD,PFN1,IGF1R,FLT1,NUMB,SMAD3,STK4,…
arachidonic acid secretion	12	16	4.7	0.064	0.00364216	PLA2G5,PLA2G10,PLA2G2C,SYK,PLA2G12A,PLA2G2A,PLA2R1,ACE,PLA2G4A,ATP5PF,PLA2G12B,PLA2G1B
arachidonate transport	12	16	4.7	0.064	0.00364216	PLA2G5,PLA2G10,PLA2G2C,SYK,PLA2G12A,PLA2G2A,PLA2R1,ACE,PLA2G4A,ATP5PF,PLA2G12B,PLA2G1B
regulation of signaling	635	1520	1.2	0.065	0.00370409	NADK,ISG15,SFRP5,PRKCZ,CLEC7A,AP1AR,CD4,TNFSF10,TGFB1,NPPA,SOD1,RUVBL1,ADCYAP1,MDK,PLA2G5,CSF1,ARHGDIA,AHSG,ZBP1,None,FGFBP3,PTN,BMP10,EDA2R,RGS5,JAK2,HDAC6,NETO1,FGFR3,WFIKKN1,EDN1,ROCK2,PRKACA,ILK,RAB7A,ITGAV,SFRP1,PPIF,CSK,GPNMB,NTRK2,CRIM1,TGFB3,PRKCA,FER,RAB11A,DCC,SNX5,DNM1,RSPO2,KIT,PTK2B,UBASH3B,PRKAR2B,PAX8,RHOC,LYN,SERPINB3,NRGN,AKT3,XCL1,PRKCB,CNTN4,INPP5F,MMP12,JAG1,HRG,HGS,CLSTN3,OAS…
inflammatory response	205	457	1.3	0.065	0.003719	PRKCZ,CLEC7A,TGFB1,NPPA,SOD1,ADCYAP1,MDK,CSF1,AHSG,ZBP1,PTN,KNG1,JAK2,BLNK,ABHD12,SAA1,CHST4,LTA,PGLYRP2,KIT,LYN,BTK,AHCY,XCL1,LTB4R,TOLLIP,IL22RA2,TBK1,CXCL10,SAA2,ECM1,ATRN,IL4,BMP2,SERPINA3,IL17D,ITIH4,SNX4,APCS,CMA1,SYK,CD36,HGF,IKBKG,CST7,CHST2,SRC,CDH5,ZYX,SPHK1,AGT,NLRP10,NFKBID,GJA1,CSF1R,IL1RL1,CXCL3,PTGS2,AKT1,CCL13,FURIN,ZC3H12A,ZNF580,PLA2G2A,IRF3,F11R,CCL22,TNFAIP3,CCL7,GPX1,PSMB4,MA…
regulation of G protein-coupled receptor signaling pathway	34	60	2.1	0.065	0.00372399	ADCYAP1,RGS5,EDN1,ROCK2,PRKCA,DNM1,RGS10,RGS18,GSK3A,PLEK,FGF8,MRAP,GRK2,DNM2,PLCB1,PPP1R9B,HOMER2,ARRB1,NMT1,BICD1,CALCR,RGS1,TMOD2,YWHAB,CCL5,F2,MRAP2,SNCA,NMT2,KLK14,KLK6,GRK5,APLP1,RGS13
cellular response to cytokine stimulus	212	474	1.3	0.066	0.00377873	ISG15,IL22RA1,CD4,MX1,VIM,CSF1,ZBP1,CTSG,EDA2R,JAK2,EDN1,PRKACA,IL12RB1,ILK,SFRP1,FER,ADAM23,KIT,PTK2B,BTK,STAT6,XCL1,IL15RA,MMP12,OAS1,TOLLIP,IL22RA2,TBK1,CXCL10,SRSF7,ECM1,IFNB1,MAPK3,GSK3A,SYK,LDLRAP1,IFNW1,HSPA1A,TANK,SRC,WAS,ZYX,SPHK1,CBL,GFPT2,IL10RA,CSF1R,CPNE1,PTPN11,IL1RL1,CXCL3,AKT1,IFNA4,CCL13,MPL,ZC3H12A,PTPN6,IL21R,IRF3,CCL22,TNFAIP3,CCL7,PID1,KHSRP,PLCB1,UBE2K,GSK3B,POSTN,PYCARD,DOK…
regulation of cellular component movement	250	566	1.3	0.066	0.00378646	CLEC7A,AP1AR,TGFB1,MDK,CSF1,ARHGDIA,None,PTN,BMP10,JAK2,HDAC6,CCL27,CHST4,FERMT3,FGF22,EDN1,ROCK2,SVBP,ITGA2B,THBS4,ILK,ITGAV,SFRP1,PLXNA4,GPNMB,LRRC15,PRKCA,FER,RAB11A,KIT,PTK2B,STK24,CEP43,RHOC,LYN,SERPINB3,AKT3,XCL1,INPP5F,FGF3,JAG1,HRG,SEMA3B,RRAS,DAB2,CAVIN1,SERPINE2,CXCL10,FLNA,FGFBP1,ECM1,SLC9A3R1,ADAMTS1,GLUL,VIL1,IL4,BMP2,INSR,MAPK3,FGF5,BCL2,RAC2,HGF,PDPK1,CHST2,SRC,WAS,CDH5,SPHK1,CASS4…
regulation of protein modification process	333	769	1.2	0.067	0.00385403	ISG15,PRKCZ,CLEC7A,TCL1B,CD4,TGFB1,NPPA,SOD1,CCNA1,ADCYAP1,CSF1,BMP10,MICAL1,FCGR1A,JAK2,WARS1,MAP2K4,HDAC6,FGFR3,FGF22,EDN1,ROCK2,SNTA1,SVBP,THBS4,ILK,SFRP1,CSK,GPNMB,NTRK2,TGFB3,FER,KIT,CTDSP1,PTK2B,UBASH3B,TNXB,PRKAR2B,CEP43,LYN,SERPINB3,INPP5F,FGF3,MAPRE3,HRG,HGS,IFNL1,DAB2,KAT5,TOLLIP,IL22RA2,TBK1,SLC9A3R1,CNTN1,INHBB,CTDSPL,MAPK8,ITGA5,IFNB1,IL4,BMP2,INSR,MAPK3,GSK3A,FGF5,PPP2R5A,BCL2,DERL1…
ncRNA metabolic process	68	135	1.6	0.068	0.00390341	RPP25L,WARS1,WARS2,DTD1,HARS1,DARS1,NARS1,YARS1,MARS1,AARS1,PES1,ZC3H12A,QTRT2,KHSRP,DARS2,SMAD2,SMAD3,TRUB1,PA2G4,EXOSC1,TARS1,URM1,PIN4,STAT3,VARS1,ELAC1,MRPL1,TFB1M,TSEN34,ADAT2,EXD1,KARS1,SMAD1,MRTO4,TSEN15,PIH1D1,TYW5,TRMT112,HNRNPA2B1,NFKB1,HSD17B10,DDX1,TFB2M,SARS2,ANKRD16,AGO1,QTRT1,GARS1,CARS1,SBDS,PNPT1,KTI12,MRM1,DTD2,PUS1,EXOSC8,BCDIN3D,NSUN6,SARS1,RPS25,PELO,IL6,RPP25,PRKRA,RPL5,TRMT…
regulation of cell communication	633	1516	1.2	0.069	0.00398767	NADK,ISG15,SFRP5,PRKCZ,CLEC7A,CD4,TNFSF10,TGFB1,NPPA,SOD1,RUVBL1,ADCYAP1,MDK,PLA2G5,CSF1,ARHGDIA,AHSG,ZBP1,None,FGFBP3,PTN,BMP10,EDA2R,RGS5,JAK2,HDAC6,NETO1,FGFR3,WFIKKN1,EDN1,ROCK2,PRKACA,ILK,RAB7A,ITGAV,SFRP1,PPIF,CSK,GPNMB,NTRK2,CRIM1,TGFB3,PRKCA,FER,RAB11A,DCC,SNX5,DNM1,RSPO2,KIT,PTK2B,UBASH3B,PRKAR2B,PAX8,RHOC,LYN,SERPINB3,NRGN,AKT3,XCL1,PRKCB,CNTN4,INPP5F,MMP12,JAG1,HRG,HGS,CLSTN3,OAS1,ARL6…
mitotic nuclear division	55	106	1.7	0.07	0.00405423	PRC1,CHMP1A,EDN1,RAB11A,ANAPC7,ZWINT,CHMP2B,TNKS,FLNA,CHMP1B,INSR,HSPA1A,SPHK1,FGF8,NAA10,SIRT2,SPAST,BMP4,PPP1R9B,KPNB1,PIN1,UBE2I,NAA50,MAD2L1BP,DRG1,VPS4A,RHOA,KIF22,CHMP2A,CDC42,VPS4B,RANBP1,CD28,BMP7,HSPA1B,NSL1,EGF,ABRAXAS2,RAN,RMDN1,CHMP6,DAPK3,NUDC,IL1B,UBE2C,NSFL1C,NDEL1,PDXP,CUL3,DYNC1LI1,UBE2S,TTN,KIF23,BTC,RACGAP1,CHMP4A
positive regulation of locomotion	160	350	1.3	0.071	0.00412969	CLEC7A,TGFB1,MDK,CSF1,None,PTN,JAK2,HDAC6,CCL27,FERMT3,EDN1,ROCK2,ITGA2B,THBS4,ILK,ITGAV,GPNMB,LRRC15,PRKCA,FER,RAB11A,KIT,PTK2B,CEP43,RHOC,LYN,SERPINB3,AKT3,XCL1,SEMA3B,RRAS,DAB2,CAVIN1,CXCL10,FLNA,FGFBP1,ADAMTS1,VIL1,IL4,BMP2,INSR,MAPK3,BCL2,RAC2,HGF,PDPK1,SRC,CDH5,SPHK1,CASS4,AGT,NTN1,CSF1R,PTGS2,AKT1,ZC3H12A,ZNF580,SEMA4G,CCL7,MCAM,AKT2,BMP4,HSPB1,POSTN,PYCARD,PFN1,IGF1R,FLT1,NUMB,SMAD3,STK4,…
cellular response to carbohydrate stimulus	39	71	1.9	0.071	0.00414877	NADK,CLEC7A,MAP2K4,PRKACA,PRKCB,NME2,CMA1,MAP2K6,PRKAA2,PIK3CA,FKBP1B,LGALS1,IGF1R,PPP3CA,STX4,RAC1,BAD,C2CD2L,OXCT1,FIS1,OSBP,TRA2B,RAF1,PIH1D1,RAB11B,ERN1,COLEC12,NDUFAF2,TREM2,VSNL1,GHRL,FOXO3,NME1,CFTR,SRI,RACK1,LEP,LRP1,GCLM
vesicle organization	74	149	1.6	0.073	0.00425499	PLA2G5,CHMP1A,RAB7A,RAB11A,DNM1,RAB1A,CHMP2B,HGS,SCARB2,SERPINE2,TYRP1,GOLPH3L,CHMP1B,BCL2,SNF8,VAPA,GNAI3,SPHK1,TSG101,RAB22A,AKT2,ARFGAP2,USP8,GOLPH3,PMEL,TBC1D20,PIP4K2B,PIP4K2A,BLOC1S1,RAB3A,BLOC1S3,RAB13,STX4,IST1,STXBP6,SAR1A,NKD2,VTA1,VPS4A,RAB32,RAB8B,CHMP2A,DLG4,STX7,VPS28,OSBP,STX6,VPS4B,VPS25,SNAP29,TBPL1,STX1A,VTI1B,RAB14,SNX11,STX10,USO1,ARF1,CHMP6,PIK3C3,CD2AP,STX17,SNCA,PDCD6IP,CUL…
growth	214	480	1.3	0.073	0.00434199	PRKCZ,TGFB1,NPPA,SOD1,RUVBL1,MDK,CSF1,PTN,BMP10,MAP2K4,HDAC6,COMP,FGFR3,EDN1,ILK,SFRP1,DBNL,PLXNA4,RAB11A,DCC,RSPO2,PTK2B,IP6K2,CEP43,RAB21,HRG,PIM1,CLSTN3,SEMA3B,HDGFL2,THBS3,KAT5,SERPINE2,ECM1,L1CAM,AGRN,SMURF1,ATRN,VIL1,INSR,GAP43,NUBP1,GSK3A,PTGFRN,BCL2,CTNNB1,HSPA1A,MINAR1,SRC,SPHK1,FGF8,ERBB2,TRIM40,AGT,PLXNA1,CRABP2,NTN1,GJA1,TSG101,CPNE1,PTPN11,GDF9,SH3GL2,TEC,AKT1,HOPX,DNM2,CDKN2D,TFCP2L…
small GTPase mediated signal transduction	97	202	1.5	0.073	0.00434881	CSF1,ARHGDIA,ROCK2,ITGAV,DBNL,RHOC,RAB21,NUCB1,CDK2,RRAS,RABIF,ARHGAP6,OPHN1,ARFIP2,DOK2,ARHGAP45,GRB2,RASA1,RAC2,SRC,WAS,CBL,RAB4B,NTN1,CYTH3,DNM2,F11R,ABL2,VAV1,ARHGAP26,KPNB1,RAB18,DOK1,BCAR3,USP8,RHOT1,LRRC59,DEF6,ABR,ARHGAP25,ARRB1,ARHGAP5,KCTD10,CCNA2,RABL3,APOA1,RAC1,TGM2,RALB,ARL3,AIF1,MAPRE2,RHOA,TGFB2,FOXM1,ABL1,ARHGDIB,ARHGEF1,CDC42,KITLG,RAF1,HMOX1,GRAP,RHOQ,GABARAP,RAB4A,G3BP1,MYOC,R…
tube development	240	543	1.3	0.073	0.00436015	SFRP5,BSG,TGFB1,MDK,CSF1,PTN,WARS1,COMP,SPINT1,EDN1,ROCK2,PRKACA,THBS4,ILK,KLHL3,ITGAV,SFRP1,GPNMB,NTRK2,VASP,TGFB3,PRKCA,CALD1,WARS2,ID2,RSPO2,KIT,PTK2B,PAX8,ADAM12,AKT3,PRKCB,MMP12,JAG1,HRG,HGS,RRAS,ANGPTL4,SERPINE2,CXCL10,FLNA,FGFBP1,ECM1,EIF4E,ITGA5,ADAMTS1,GLUL,SMAD5,SRSF6,BMP2,RASA1,PGK1,MAPK3,BCL2,ROBO2,CMA1,SYK,FAP,POFUT1,CTNNB1,HGF,PDPK1,HIKESHI,MINAR1,SRC,STIM1,CDH5,SPHK1,FGF8,ERBB2,HES…
cell motility	354	822	1.2	0.073	0.00436023	PRKCZ,CLEC7A,AP1AR,BSG,TGFB1,GFRA3,MDK,CSF1,ARHGDIA,None,PTN,BMP10,JAK2,HDAC6,SAA1,CCL27,CHST4,BIN2,FERMT3,FGF22,EDN1,ROCK2,SVBP,ITGA2B,THBS4,ILK,ITGAV,SFRP1,PLXNA4,GPNMB,LRRC15,NTRK2,PRKCA,FER,RAB11A,DCC,LCP1,PDLIM1,KIT,INPP5B,PTK2B,STK24,DSTN,RAB1A,CEP43,RHOC,LYN,SERPINB3,AKT3,XCL1,INPP5F,FGF3,MMP12,JAG1,HRG,SEMA3B,RRAS,DAB2,CAVIN1,SERPINE2,CXCL10,OPHN1,FLNA,FGFBP1,ECM1,SLC9A3R1,L1CAM,ITGA5,ADA…
localization of cell	354	822	1.2	0.073	0.00436023	PRKCZ,CLEC7A,AP1AR,BSG,TGFB1,GFRA3,MDK,CSF1,ARHGDIA,None,PTN,BMP10,JAK2,HDAC6,SAA1,CCL27,CHST4,BIN2,FERMT3,FGF22,EDN1,ROCK2,SVBP,ITGA2B,THBS4,ILK,ITGAV,SFRP1,PLXNA4,GPNMB,LRRC15,NTRK2,PRKCA,FER,RAB11A,DCC,LCP1,PDLIM1,KIT,INPP5B,PTK2B,STK24,DSTN,RAB1A,CEP43,RHOC,LYN,SERPINB3,AKT3,XCL1,INPP5F,FGF3,MMP12,JAG1,HRG,SEMA3B,RRAS,DAB2,CAVIN1,SERPINE2,CXCL10,OPHN1,FLNA,FGFBP1,ECM1,SLC9A3R1,L1CAM,ITGA5,ADA…
purine ribonucleotide biosynthetic process	38	69	1.9	0.073	0.00436451	TGFB1,NPPA,AK2,NME2,IL4,AMPD2,PID1,ATP5PO,PPCS,NME4,VCP,APRT,NME7,STAT3,ACSS2,PKLR,ENO1,PDHA2,ATP5F1B,NUDT2,PDHX,ATP5PF,GUK1,NPPC,PDK1,TREM2,SNCA,GMPS,PPARA,HPRT1,PAICS,GCDH,NME1,ACAT1,IMPDH1,ATIC,VPS9D1,ALDOA
endocytosis	148	322	1.4	0.075	0.00445796	CLEC7A,TMPRSS15,PLA2G5,AHSG,MRC2,FCGR1A,BIN2,RAB7A,ITGAV,DBNL,SNX5,DNM1,RAB1A,RAB21,INPP5F,DAB2,RAB5C,SCARB2,SCARF2,OPHN1,SNCG,CSNK1G1,IL4,GRB2,SMAP1,INSR,AP1G2,MAPK3,NCKIPSD,RAB5B,SYK,CD36,LDLRAP1,SNX12,RAC2,RAB5A,CD22,TRIP10,SRC,PACSIN2,SPHK1,CBL,RAB4B,TSG101,IL10RA,SH3GL2,RAB22A,GRK2,DNM2,CLINT1,ABL2,MAPKAPK2,PYCARD,MAPKAPK3,SFRP4,PICK1,NUMB,PEAR1,SH3GL3,CSNK1G2,MICALL1,ARHGAP25,LGALS3BP,PPP3C…
export from cell	179	396	1.3	0.075	0.00446838	NADK,TGFB1,NPPA,ADCYAP1,MICAL1,JAK2,PLA2G10,SAA1,COMP,EDN1,SVBP,RAB7A,SFRP1,NTRK2,TGFB3,FER,RAB11A,KIT,RAB1A,PAX8,RAB21,LYN,PDIA4,BTK,PRKCB,HGS,CAVIN1,SERPINE2,RAB11FIP3,SYTL4,GOLPH3L,INHBB,GLUL,SNCG,IL4,BMP2,SNX4,PLEK,RAB3D,SYK,RAB3C,SNF8,RAC2,RAB5A,PDPK1,HADH,AGT,CBL,MAP2K6,ATP1B2,NRXN1,GJA1,TSG101,PTPN11,GDF9,GDNF,ARFIP1,FURIN,GRK2,GSK3B,PICK1,SMAD2,FKBP1B,NECAB3,SMAD4,GOLPH3,RHOT1,NAGPA,UNC13…
negative regulation of molecular function	251	570	1.3	0.075	0.00449044	SFRP5,PRKCZ,NPPA,ADCYAP1,AHSG,PTN,KNG1,MICAL1,JAK2,PLA2G10,WARS1,HDAC6,WFIKKN1,SPINT1,ROCK2,ILK,ITGAV,SFRP1,PPIF,CSK,CRIM1,ID2,UBASH3B,PRKAR2B,CEP43,LYN,SERPINB3,XCL1,HRG,PIM1,DAB2,ANGPTL4,TNKS,SERPINE2,FLNA,ECM1,SLC9A3R1,MAPK8,VIL1,BMP2,SERPINA3,MAPK3,GSK3A,PPP2R5A,ITIH4,APCS,MITD1,HGF,STUB1,PDPK1,CST7,GNAI3,SRC,SERPING1,TRIM40,OPRPN,AGT,CBL,CASP3,GMFG,TSG101,ARL6IP1,CPNE1,PTGS2,AKT1,FURIN,ZC3H1…
chemical homeostasis	201	449	1.3	0.075	0.00453529	NADK,SOD1,ADCYAP1,KNG1,JAK2,PLA2G10,KEL,SAA1,EDN1,PRKACA,RAB7A,KLHL3,ITGAV,SNX5,PTK2B,UBASH3B,LYN,XCL1,PRKCB,NME2,OAS1,ANGPTL4,PTH1R,CXCL10,FTL,SLC9A3R1,FTH1,RBP1,INSR,MAPK3,NUBP1,BCL2,CMA1,OIT3,CD36,LDLRAP1,ACOX1,PDPK1,SRC,STIM1,CDH5,AGT,FATE1,ATP1B2,GJA1,DCN,PTPN11,HMOX2,AKT1,CCL13,PTPN6,SLMAP,CCL7,HOMER1,PRKAA2,ABL2,CETP,SFRP4,FYN,PIK3CA,FKBP1B,CEBPA,SMAD4,LGALS1,IGF1R,SMAD3,HOMER2,TMEM38B,ALO…
fatty acid oxidation	29	50	2.2	0.075	0.0045544	IVD,CRAT,ACOX1,HADH,AKT1,SLC27A2,DECR1,AKT2,SCP2,ADH5,CROT,HSD17B4,ACADM,ACADVL,ECHS1,ACOT8,HSD17B10,ECI2,DECR2,ECH1,PPARA,MAPK14,GCDH,FABP3,ADIPOQ,ECHDC1,ACAT1,ECI1,LEP
phosphatidylinositol-mediated signaling	53	102	1.7	0.075	0.00455743	JAK2,EDN1,NTRK2,KIT,INPP5F,SERPINE2,SLC9A3R1,INSR,HGF,SRC,RPS6KB1,ERBB2,AGT,CBL,CSF1R,DCN,AKT1,PTPN6,SIRT2,PLCB1,FYN,PIK3CA,CAT,IGF1R,FLT1,PEAR1,ROR1,FGFR1,TGFB2,HAX1,CD28,MYOC,EGF,STAMBP,CCL5,F2,PTEN,PIK3CG,PIK3C3,TREM2,IL18,UBE3A,SELP,OSM,PDGFC,UNC5B,FN1,EZR,NCF1,HCLS1,FGR,LEP,CSF3
inositol lipid-mediated signaling	53	102	1.7	0.075	0.00455743	JAK2,EDN1,NTRK2,KIT,INPP5F,SERPINE2,SLC9A3R1,INSR,HGF,SRC,RPS6KB1,ERBB2,AGT,CBL,CSF1R,DCN,AKT1,PTPN6,SIRT2,PLCB1,FYN,PIK3CA,CAT,IGF1R,FLT1,PEAR1,ROR1,FGFR1,TGFB2,HAX1,CD28,MYOC,EGF,STAMBP,CCL5,F2,PTEN,PIK3CG,PIK3C3,TREM2,IL18,UBE3A,SELP,OSM,PDGFC,UNC5B,FN1,EZR,NCF1,HCLS1,FGR,LEP,CSF3
regulation of apoptotic signaling pathway	93	193	1.5	0.075	0.00456872	TNFSF10,SOD1,ITGAV,SFRP1,PPIF,SLC9A3R1,INHBB,IFNB1,IL4,BCL2,CTNNB1,HGF,HSPA1A,GNAI3,SRC,NCK2,CRADD,AGT,GDNF,PTGS2,AKT1,MAPK9,CDKN2D,TNFAIP3,GPX1,GSK3B,BMP4,HSPB1,PYCARD,FYN,TXNDC12,STK4,BDNF,MCL1,STX4,CTNNA1,FGFR1,HNRNPK,BCL2L1,EIF5A,BAD,CSNK2A1,ENO1,RIPK1,FIS1,PML,CYLD,PPIA,MAP2K5,TRAF1,PDIA3,RAF1,HMOX1,PIH1D1,TPT1,PIAS4,HSPA1B,LCK,NONO,SKIL,MUC1,CSNK2A2,MIF,GSTP1,PTEN,MMP9,TREM2,UBB,DAPK3,S100A…
regulation of response to cytokine stimulus	43	80	1.8	0.075	0.0045944	ISG15,CSF1,ZBP1,EDN1,MMP12,OAS1,TBK1,ECM1,SYK,HSPA1A,SPHK1,CPNE1,PTPN11,PTPN6,IRF3,TNFAIP3,UBE2K,PYCARD,C1QTNF4,APOA1,RIPK1,IL36RN,CYLD,MAP2K5,SHARPIN,PIAS4,MED1,HSPA1B,ROBO1,IL1RN,CCL5,GSTP1,CDC37,TREM2,DDX58,TTLL12,RFFL,IL1R1,IL1R2,IKBKB,ADIPOQ,IL6,SLIT2,TLR4
regulation of ubiquitin-dependent protein catabolic process	43	80	1.8	0.075	0.0045944	PTK2B,CDK2,DAB2,SMURF1,GSK3A,STUB1,HSPA1A,AKT1,MAPK9,SIRT2,UBE2K,GSK3B,CEBPA,GIPC1,VCP,NKD2,UCHL5,PDCL3,CSNK2A1,SHH,PML,DDRGK1,NUB1,ARAF,GABARAP,HSPA1B,SGTA,RAD23B,EGF,CSNK2A2,PTEN,CAMLG,BAG6,UBE2V2,USP14,STYX,UBE3A,FHIT,PARK7,RACK1,UBQLN4,RPL5,COMMD1,BCAP31
regulation of endothelial cell development	9	11	7.1	0.076	0.00466925	ROCK2,CDH5,F11R,PLCB1,VEGFA,IL1B,IKBKB,VCL,TNFRSF1A
regulation of establishment of endothelial barrier	9	11	7.1	0.076	0.00466925	ROCK2,CDH5,F11R,PLCB1,VEGFA,IL1B,IKBKB,VCL,TNFRSF1A
positive regulation of cellular protein metabolic process	311	717	1.2	0.076	0.00467175	PRKCZ,CLEC7A,TCL1B,CD4,TNFSF10,TGFB1,VIM,ADCYAP1,CSF1,BMP10,FCGR1A,JAK2,PLA2G10,MAP2K4,HDAC6,FGFR3,FGF22,EDN1,ROCK2,THBS4,ILK,CSK,GPNMB,NTRK2,TGFB3,KIT,PTK2B,LYN,SERPINB3,FGF3,MAPRE3,ANTXR1,ARL6IP5,IFNL1,DAB2,KAT5,TOLLIP,CLEC3B,TBK1,CNTN1,INHBB,ITGA5,SMURF1,IFNB1,IL4,BMP2,INSR,MAPK3,GSK3A,FGF5,PPP2R5A,BCL2,DERL1,SYK,CD36,CTNNB1,IFNW1,HGF,STUB1,PDPK1,HSPA1A,TANK,SRC,NCK2,CDH5,RPS6KB1,SPHK1,CRADD,C…
positive regulation of gene silencing by miRNA	14	20	3.7	0.076	0.00468469	TGFB1,DDX6,BMP4,LIMD1,STAT3,FXR1,RIPK1,TIAL1,EIF4G1,FMR1,MAP2K1,IL6,MAP2K2,AGO2
RNA processing	128	275	1.4	0.076	0.00469035	CELF2,TGFB1,RPP25L,M1AP,PRKACA,SRSF7,RBM39,SRSF6,USP4,MBNL1,AHCYL1,HSPA1A,MBNL2,HNRNPH1,CIRBP,RBM3,AARS1,PES1,THOC1,ZC3H12A,QTRT2,RBFOX1,KHSRP,BMP4,RBFOX2,PPP1R9B,SMAD2,RPRD1B,SMAD3,TRUB1,PUF60,PA2G4,EXOSC1,RBM4,PPP3CA,URM1,SYF2,PIN4,SNRPA1,TIA1,BICD1,HNRNPK,PPP2R1A,TXNL4B,STAT3,FXR1,ELAC1,RTCA,MRPL1,SRPK1,SF1,TFB1M,TSEN34,RIPK1,ADAT2,HNRNPA0,NCL,TRA2B,KARS1,PPIH,SMAD1,MRTO4,TSEN15,UBL5,YBX1,PIH1…
organophosphate metabolic process	195	435	1.3	0.077	0.00479139	NADK,TGFB1,NPPA,PLA2G5,SPTLC2,UPP1,PLA2G10,PLA2G2C,PON1,ABHD12,ENO2,PDE5A,AK2,INPP5B,PTK2B,IP6K2,INPP5A,INPP5F,NME2,NT5C,PTH1R,VAC14,ETNK1,GALK1,IL4,BPGM,RPIA,INSR,PGK1,PLEK,GNAI3,GFPT2,AMPD2,CSF1R,PLA2G12A,DCTD,GPCPD1,PLA2G2A,PID1,PLCB1,PRKAA2,ACSF2,CETP,ATP5PO,PPCS,PIK3CA,PFKFB3,NME4,TK2,CROT,HSD17B4,TMEM38B,UGP2,PIP4K2B,PIP4K2A,ACHE,PLCG2,ASMTL,MBD4,VCP,NT5M,SULT1A3,APRT,APOA1,NME7,PMVK,ABHD5,…
Ras protein signal transduction	72	145	1.6	0.077	0.00479524	CSF1,ARHGDIA,ROCK2,DBNL,RAB21,CDK2,RRAS,ARHGAP6,OPHN1,DOK2,GRB2,RASA1,RAC2,WAS,CBL,RAB4B,NTN1,CYTH3,DNM2,F11R,ABL2,KPNB1,DOK1,USP8,LRRC59,ARRB1,ARHGAP5,KCTD10,CCNA2,RABL3,APOA1,RAC1,RALB,AIF1,MAPRE2,RHOA,TGFB2,FOXM1,ABL1,ARHGDIB,ARHGEF1,CDC42,KITLG,RAF1,GRAP,GABARAP,RAB4A,G3BP1,MYOC,ROBO1,STAMBP,MRAS,PIK3CG,CRK,TAX1BP3,CRKL,RAB33A,TIMP2,RTN4R,ARHGAP1,RALA,CUL3,PSD2,BCL6,EPS8L2,PARK7,GDI1,G3BP2,RD…
positive regulation of phosphatidylinositol 3-kinase signaling	36	65	2	0.077	0.00482308	JAK2,NTRK2,KIT,INSR,HGF,SRC,AGT,CBL,DCN,PTPN6,FYN,CAT,IGF1R,FLT1,ROR1,FGFR1,TGFB2,HAX1,CD28,MYOC,EGF,CCL5,F2,TREM2,IL18,UBE3A,SELP,OSM,PDGFC,UNC5B,FN1,NCF1,HCLS1,FGR,LEP,CSF3
regulation of protein localization to nucleus	36	65	2	0.077	0.00482308	TGFB1,JAK2,FLNA,GLUL,CD36,SRC,TRIM40,PTGS2,AKT1,ZC3H12A,GSK3B,BMP4,FYN,SMAD3,PIN1,UFM1,CTNNA1,CCT5,MAPK1,CCT7,SHH,CCT8,OTUD7B,RAN,SUMO3,APOD,F2,CD2AP,TCP1,RAB23,MAPK14,YAP1,PARK7,HCLS1,LEP,NGFR
positive regulation of proteolysis	92	191	1.5	0.077	0.00484396	CLEC7A,TNFSF10,JAK2,ROCK2,PTK2B,LYN,SERPINB3,ANTXR1,ARL6IP5,DAB2,CLEC3B,SMURF1,GSK3A,SYK,STUB1,HSPA1A,TANK,SRC,CRADD,AKT1,FURIN,ZC3H12A,MAPK9,SIRT2,CR1,GSK3B,PYCARD,FYN,CEBPA,SMAD3,ARRB1,WDR48,IFI16,VCP,IST1,NKD2,STAT3,RHOA,EPHA4,BAD,APAF1,ENO1,GSN,VSIR,FIS1,PML,CCN1,LGMN,HSPD1,DAPK1,DDRGK1,NUB1,GABARAP,HSF1,PSMC5,DIABLO,HSPA1B,SGTA,ROBO1,HSPE1,F3,EGF,LCK,PTEN,AIFM1,PPM1F,BAG6,LGALS9,TREM2,UBE2V2…
ribonucleotide biosynthetic process	42	78	1.9	0.077	0.0048527	TGFB1,NPPA,UPP1,AK2,NME2,IL4,AMPD2,PID1,ATP5PO,PPCS,NME4,VCP,APRT,NME7,STAT3,ACSS2,UCK1,CTPS1,PKLR,ENO1,CMPK1,PDHA2,ATP5F1B,NUDT2,PDHX,ATP5PF,GUK1,NPPC,PDK1,TREM2,SNCA,GMPS,PPARA,HPRT1,PAICS,GCDH,NME1,ACAT1,IMPDH1,ATIC,VPS9D1,ALDOA
regulation of body fluid levels	98	205	1.5	0.078	0.00491479	KNG1,JAK2,SAA1,COMP,FERMT3,PLG,EDN1,ITGA2B,PRKACA,ILK,PRKCA,UBASH3B,CSRP1,LYN,MYL9,HRG,SERPINE2,FLNA,MYL12A,MPIG6B,PLEK,SYK,CD36,FAP,PAFAH2,SRC,WAS,SERPING1,FLI1,GJA1,CLIC1,TEC,MPL,PTPN6,F11R,HPSE,HSPB1,METAP1,VAV1,FIBP,PIK3CA,PEAR1,DMTN,PLCG2,C1QTNF1,BLOC1S3,APRT,F8,GOT2,SHH,TFPI,HGFAC,DDR1,VEGFA,PPIA,PLA2G4A,F9,PRKCQ,AKR1B1,VWF,MED1,PROCR,F11,F3,SERPINA1,SERPINA10,LCK,GP5,KRT1,F2,STAT5A,PLAT,PI…
protein autophosphorylation	64	127	1.6	0.078	0.00495774	JAK2,FGFR3,PRKACA,CSK,GPNMB,NTRK2,FER,KIT,PTK2B,STK24,VRK1,LYN,BTK,PIM1,NME2,INSR,MAPK3,SYK,PDPK1,SRC,ERBB2,CSF1R,TEC,AKT1,GSK3B,EIF2S1,MAPKAPK2,MAPKAPK3,FYN,IMPACT,IGF1R,FLT1,STK4,CSNK1G2,MAP3K11,FGFR1,FLT4,MKNK1,EPHA4,ABL1,RIPK1,ACE,DDR1,VEGFA,DAPK1,ENG,MOB1B,CAMK2D,MVP,CAMK2B,ERN1,MARK3,DAPK3,GRK5,WNK3,PDGFC,HTATIP2,ADIPOQ,MAP2K2,EPHA1,FGR,WNK1,OXSR1,MAPKAPK5
cellular modified amino acid biosynthetic process	15	22	3.4	0.079	0.00504036	MTHFS,ACADM,MTHFD1,DHFR,GCH1,ALDH7A1,GSS,HAGH,CHAC1,GATM,PARK7,ATIC,PLOD2,CKMT1A,GCLM
actin nucleation	15	22	3.4	0.079	0.00504036	AP1AR,ARPC1B,ARFIP2,VIL1,ARPC3,WAS,GMFG,ARFIP1,GMFB,PICK1,ARPC2,ARPC5,GSN,EVL,ARF1
regulation of axon regeneration	15	22	3.4	0.079	0.00504036	PTN,STK24,INPP5F,FLNA,FKBP1B,RTN4RL1,KLK8,EPHA4,PTEN,GRN,RTN4R,MAP2K1,NDEL1,SPP1,LRP1
negative regulation of catalytic activity	189	421	1.3	0.079	0.00505702	PRKCZ,NPPA,ADCYAP1,AHSG,PTN,KNG1,MICAL1,WARS1,HDAC6,WFIKKN1,SPINT1,ROCK2,ILK,SFRP1,PPIF,CSK,CRIM1,UBASH3B,PRKAR2B,CEP43,LYN,SERPINB3,HRG,ANGPTL4,SERPINE2,ECM1,VIL1,BMP2,SERPINA3,GSK3A,PPP2R5A,ITIH4,APCS,HGF,PDPK1,CST7,GNAI3,SRC,SERPING1,OPRPN,AGT,CBL,CASP3,GMFG,TSG101,ARL6IP1,PTGS2,AKT1,FURIN,PTPN6,CDKN2D,FAF2,F11R,TNFAIP3,GPX1,YWHAG,GMFB,CR1,GSK3B,BMP4,HSPB1,PYCARD,PPP1R9B,TIPRL,FKBP1B,CEBPA,ITI…
positive regulation of intracellular transport	51	98	1.7	0.08	0.00512311	TGFB1,JAK2,PRKACA,ZFAND1,RAB21,DAB2,FLNA,MAPK8,GSK3A,LDLRAP1,RAC2,ERBB2,PTGS2,ZC3H12A,AKT2,GSK3B,SCP2,FYN,SMAD3,TBC1D20,CIB1,NMT1,RNF31,SAR1A,EHD1,MAPK1,UBE2D3,SHH,FIS1,CDC42,UBL5,RAN,CSNK2A2,ARF1,GZMB,MIEF1,ABLIM3,IL1B,MSN,CACNB3,MAPK14,EZR,ANXA2,HTRA2,CD81,HCLS1,SFN,RDX,LEP,BCAP31,HSPA1L
unsaturated fatty acid metabolic process	25	42	2.3	0.081	0.0051809	PLA2G10,ABHD12,EDN1,HPGDS,MAPK3,ACOX1,ZADH2,PTGS2,GPX1,SCP2,ALOX5,ALOX15B,PLA2G4A,ACOT8,PTGES3,AKR1B1,MIF,PTGES2,GSTP1,DECR2,IL1B,PTGR1,GSTA1,TNFRSF1A,PTGDS
stress-activated MAPK cascade	67	134	1.6	0.081	0.00519623	CLEC7A,NPPA,EDA2R,MAP2K4,SFRP1,PTK2B,SERPINB3,ARL6IP5,MAPK8,BMP2,MAPK3,HGF,SPHK1,AGT,MAP2K6,AKT1,ZC3H12A,MAPK9,PLCB1,BMP4,MAPKAPK2,PYCARD,IGF1R,SMAD3,DUSP3,MAP3K11,CCM2,AIDA,FLT4,MAPK1,TGFB2,SPI1,TIRAP,EDAR,FOXM1,RIPK1,CDC42,VEGFA,CYLD,PPIA,CD27,TRAF1,PRMT1,COPS5,IRAK4,NFKB1,MAPK10,GSTP1,LGALS9,TREM2,IGBP1,CRKL,IL1B,FGF19,MAP2K1,MAPK14,IKBKB,STK3,EZR,LTBR,NCF1,MAP2K2,MAP2K3,MMP8,SEMA4C,TLR4,LEP
primary metabolic process	1466	3652	1.2	0.081	0.00523839	H2AW,CELF2,NADK,ISG15,MMP17,SFRP5,PRKCZ,CLEC7A,TCL1B,PSMA2,CD4,TNFSF10,TGFB1,NPPA,ADAMDEC1,VIM,SOD1,TMPRSS15,H2AZ1,ATF1,RUVBL1,MRPS14,CCNA1,ADCYAP1,MDK,PLA2G5,C12orf65,CSF1,SPTLC2,AHSG,SULT4A1,UPP1,None,CTSG,HSD17B7,RPP25L,BMP10,KNG1,MICAL1,CHMP1A,EDA2R,GALNT3,FCGR1A,MMP16,PRDX4,CTSF,JAK2,PLA2G10,PLA2G2C,PON1,WARS1,KEL,MAP2K4,ABHD12,M1AP,EVPL,HDAC6,CHST4,ZNF10,COMP,FGFR3,B4GALT3,PLG,WFIKKN1,FGF22…
positive regulation of cytoskeleton organization	55	107	1.7	0.081	0.0052407	AP1AR,BMP10,CCL27,EDN1,ROCK2,SFRP1,VASP,TGFB3,FER,FHOD1,PTK2B,DSTN,ARPC1B,RHOC,FLNA,ARFIP2,MAPRE1,VIL1,ARPC3,GRB2,PLEK,HSPA1A,WAS,NCK2,GMFG,ARFIP1,SPAST,GMFB,PYCARD,PFN1,PICK1,SMAD3,ARPC2,APOA1,RAC1,DRG1,ARL3,ARPC5,RHOA,ABL1,HAX1,GSN,CDC42,VPS4B,CCL26,BAG4,HSPA1B,MYOC,EVL,ARF1,PPM1F,PFDN2,PDXP,HCLS1,EPHA1,CSF3
icosanoid transport	16	24	3.2	0.081	0.00530087	PLA2G5,PLA2G10,PLA2G2C,EDN1,SYK,MAP2K6,PLA2G12A,PLA2G2A,PLA2R1,ACE,PLA2G4A,ATP5PF,IL1B,PLA2G12B,PLA2G1B,LEP
regulation of reactive oxygen species biosynthetic process	16	24	3.2	0.081	0.00530087	CD36,FYN,ALOX5,PLCG2,STAT3,RHOA,HSPD1,SNCA,ARG2,PPARA,FOXO3,PARK7,CFLAR,MMP8,TLR4,ADGRB1
superoxide metabolic process	24	40	2.4	0.081	0.00531451	CLEC7A,TGFB1,SOD1,MPO,EDN1,SYK,CD36,GNAI3,AGT,AKT1,CYB5R4,FBLN5,DHFR,BMP7,CRP,PRG3,GSTP1,GCH1,CD177,ACP5,IMMP2L,SH3PXD2B,NCF1,APOA4
positive regulation of viral process	24	40	2.4	0.081	0.00531451	CD4,CLEC4G,RAB7A,CHMP2B,VAPA,TSG101,LGALS1,TBC1D20,CD209,VPS4A,SRPK1,CHMP2A,PPIH,PPIA,KPNA6,CD28,CCL5,PPID,PPIE,LGALS9,FMR1,PPARA,SRPK2,PKN2
gene silencing	34	61	2	0.081	0.00531748	TGFB1,CHMP1A,CDK2,DDX6,ZC3H12A,SIRT2,BMP4,H3C1,SMAD2,SMAD3,RBM4,PPP3CA,HMGA2,CNOT9,LIMD1,STAT3,FXR1,SCMH1,RIPK1,EXD1,SMAD1,HNRNPA2B1,TIAL1,RAN,CNOT1,AGO1,EIF4G1,FMR1,MAP2K1,BCDIN3D,IL6,MAP2K2,PRKRA,AGO2
peptidyl-threonine phosphorylation	34	61	2	0.081	0.00531748	TGFB1,ROCK2,PRKACA,PRKCA,VRK1,PRKCB,TBK1,TNKS,MAPK8,GSK3A,BCL2,PDPK1,SPHK1,AKT1,GRK2,SIRT2,CDC42BPB,UBE2K,GSK3B,DMTN,MAPK1,CSNK2A1,BMP7,CAMK2D,CAB39,EGF,CSNK2A2,EIF4G1,CDC42BPA,MAP2K1,CHI3L1,WNK3,WNK1,OXSR1
positive regulation of developmental process	299	689	1.2	0.081	0.00536298	ISG15,CDON,PRKCZ,CLEC7A,CD4,TGFB1,MDK,PLA2G5,CSF1,None,PTN,BMP10,JAK2,PLA2G10,LTA,SPINT1,EDN1,IL12RB1,ILK,SFRP1,DBNL,PLXNA4,NTRK2,TGFB3,PRKCA,RAB11A,ID2,OLFM4,KIT,PTK2B,PAX8,RAB21,LYN,BTK,STAT6,SERPINB3,ADAM12,NAP1L1,AKT3,PRKCB,IL15RA,JAG1,PIM1,NME2,CLSTN3,RRAS,DAB2,ANGPTL4,CBLN2,SERPINE2,FLNA,PPP1CC,ECM1,L1CAM,AGRN,ITGA5,SMURF1,VIL1,SMAD5,IL4,BMP2,SMAP1,INSR,BCL2,ROBO2,CMA1,SYK,CD36,CTNNB1,HGF,P…
regulation of cysteine-type endopeptidase activity	70	141	1.6	0.081	0.00540494	CLEC7A,TNFSF10,MICAL1,JAK2,ARL6IP5,MGMT,VIL1,SYK,HGF,CST7,SRC,CRADD,ARL6IP1,PTGS2,AKT1,CDKN2D,GPX1,PYCARD,FYN,SMAD3,RPS6KA3,ARRB1,IFI16,VCP,RHOA,BAD,CSNK2A1,APAF1,GSN,FIS1,PML,CCN1,LGMN,HSPD1,VEGFA,PRDX3,DAPK1,MAP2K5,CD27,RAF1,PIH1D1,HSF1,DIABLO,ROBO1,HSPE1,F3,LCK,BIRC2,AIFM1,PPM1F,TNFAIP8,MMP9,LGALS9,IGBP1,S100A9,SNCA,TNFSF15,BID,RFFL,CARD18,HTRA2,PSMB9,PARK7,CFLAR,RACK1,CYCS,SFN,SERPINB9,NGFR,B…
regulation of defense response	160	352	1.3	0.081	0.0054165	ISG15,CLEC7A,NPPA,SOD1,ADCYAP1,MDK,PLA2G5,AHSG,ZBP1,JAK2,ABHD12,SAA1,LTA,IL12RB1,PGLYRP2,VSIG4,FAM3A,LYN,BTK,XCL1,MMP12,OAS1,NPLOC4,IL22RA2,TBK1,PENK,IFNB1,IL4,MAPK3,SNX4,APCS,CMA1,SYK,HGF,CST7,SRC,CDH5,ZYX,SPHK1,SERPING1,AGT,NLRP10,GJA1,PTPN11,IL1RL1,PTGS2,FURIN,ZC3H12A,PTPN6,SIRT2,PLA2G2A,IRF3,TNFAIP3,GPX1,UBE2K,CR1,PSMB4,VAV1,PYCARD,FYN,CEBPA,SMAD3,UFD1,ALOX5,C1QTNF3,PLCG2,HAMP,IFI16,TRADD,APO…
negative regulation of signal transduction	256	584	1.3	0.081	0.00544463	ISG15,SFRP5,PRKCZ,NPPA,MDK,AHSG,RGS5,WFIKKN1,PRKACA,RAB7A,ITGAV,SFRP1,PPIF,CSK,CRIM1,TGFB3,SNX5,DNM1,UBASH3B,LYN,SERPINB3,PRKCB,INPP5F,MMP12,HRG,HGS,OAS1,NPLOC4,DAB2,RGS10,SERPINE2,ECM1,SLC9A3R1,RGS18,SMURF1,MPIG6B,IL4,BMP2,RASA1,GSK3A,BCL2,PLEK,CTNNB1,HGF,CD22,STUB1,PDPK1,HSPA1A,GNAI3,MINAR1,TANK,SRC,NCK2,RPS6KB1,UBE2D1,TRIM40,AGT,CBL,TSG101,DCN,CPNE1,MRAP,RBPMS2,GDNF,PTGS2,AKT1,THOC1,GRK2,ZC3H1…
homeostatic process	314	726	1.2	0.081	0.00545571	NADK,ISG15,SOD1,ADCYAP1,CSF1,None,KNG1,PRDX4,JAK2,PLA2G10,KEL,SAA1,EDN1,PRKACA,RAB7A,KLHL3,ITGAV,CSK,PRKCA,SNX5,ID2,KIT,PTK2B,UBASH3B,LYN,CHMP2B,STAT6,AKT3,XCL1,PRKCB,NME2,OAS1,ANGPTL4,PTH1R,CXCL10,FTL,SLC9A3R1,FTH1,MPIG6B,RBP1,SMAD5,IL4,BPGM,SERPINA3,SMAP1,INSR,MAPK3,NUBP1,BCL2,CMA1,RAB3D,SYK,OIT3,CD36,CTNNB1,LDLRAP1,RAC2,ACOX1,PDPK1,HSPA1A,SRC,STIM1,CDH5,HADH,OPRPN,AGT,CASP3,TMOD3,MAP2K6,FATE1,…
production of miRNAs involved in gene silencing by miRNA	17	26	3	0.081	0.00547914	TGFB1,ZC3H12A,BMP4,SMAD2,SMAD3,PPP3CA,STAT3,RIPK1,SMAD1,HNRNPA2B1,AGO1,MAP2K1,BCDIN3D,IL6,MAP2K2,PRKRA,AGO2
positive regulation of nitric oxide biosynthetic process	17	26	3	0.081	0.00547914	CLEC7A,JAK2,EDN1,PTK2B,INSR,CD36,AGT,PTGS2,AKT1,DNM2,SMAD3,AIF1,PTX3,IL1B,PKD2,MMP8,TLR4
ribose phosphate biosynthetic process	45	85	1.8	0.081	0.00550739	TGFB1,NPPA,UPP1,AK2,NME2,IL4,AMPD2,PID1,ATP5PO,PPCS,NME4,VCP,APRT,NME7,STAT3,ACSS2,UCK1,CTPS1,PKLR,ENO1,CMPK1,PDHA2,ATP5F1B,TKT,NUDT2,PDHX,ATP5PF,GUK1,NPPC,PDK1,TREM2,SNCA,G6PD,GMPS,PPARA,HPRT1,PAICS,PRPSAP2,GCDH,NME1,ACAT1,IMPDH1,ATIC,VPS9D1,ALDOA
positive regulation of growth	66	132	1.6	0.081	0.00551729	CSF1,BMP10,EDN1,ILK,SFRP1,DBNL,RAB11A,PTK2B,CEP43,PIM1,HDGFL2,L1CAM,AGRN,SMURF1,VIL1,INSR,BCL2,SPHK1,FGF8,ERBB2,CRABP2,NTN1,AKT1,HOPX,TFCP2L1,PLCB1,ISLR2,SYT17,BDNF,EIF4G2,PIN1,RPS6KA3,HAMP,CIB1,N6AMT1,IST1,GHR,MAPK1,RHOA,TWF2,TGFB2,CSNK2A1,CDH4,CDC42,VEGFA,MAP2K5,F2,PPM1F,EIF4G1,S100A9,GHRL,NDEL1,CXCL16,MAPK14,FN1,YAP1,EZR,BASP1,PPIB,ZFYVE27,GDI1,PRSS2,SFN,SYT2,LEP,LRP1
autophagosome assembly	22	36	2.5	0.081	0.00552911	RAB7A,RAB1A,SMURF1,RAB5A,MAP1LC3B,PIP4K2B,PIP4K2A,RALB,GABARAPL1,SCFD1,RAB1B,GABARAP,ADPRH,PIK3C3,STX17,GABARAPL2,NSFL1C,RAB23,LRSAM1,ATG5,MAP1LC3A,CHMP4A
post-Golgi vesicle-mediated transport	22	36	2.5	0.081	0.00552911	AP1AR,CSK,RABIF,GOLPH3L,AP1G2,DNM2,GGA1,GOLPH3,RABEP1,GGA3,STXBP6,EHD3,ARL3,SCFD1,RP2,VTI1B,RAB14,RAB31,VTI1A,RNF215,RACK1,COMMD1
regulation of substrate adhesion-dependent cell spreading	22	36	2.5	0.081	0.00552911	AP1AR,MDK,ILK,OLFM4,FLNA,CASS4,DNM2,POSTN,GBP1,UNC13D,DMTN,ARPC2,CIB1,APOA1,RAC1,ABL1,ACTN4,CDC42,MYOC,CRK,CRKL,RAC3
regulation of transmembrane transport	105	222	1.4	0.081	0.00552948	NPPA,KEL,NETO1,EDN1,SNTA1,PRKACA,PPIF,PTK2B,UBASH3B,LYN,XCL1,PRKCB,PIM1,ARL6IP5,YWHAH,CXCL10,FLNA,SLC9A3R1,CLIC3,INSR,GSK3A,BCL2,AHCYL1,PDPK1,STIM1,AGT,ATP1B2,GJA1,ARL6IP1,PTPN11,CLIC1,AKT1,DNM2,PTPN6,SLMAP,HOMER1,PID1,AKT2,FYN,STAC,FKBP1B,TMEM38B,PLCG2,HAMP,EHD3,ATP1B1,SLC30A5,FGF12,CALCR,CLIC4,ASPSCR1,GRB10,ABL1,DLG4,ACTN4,RIPK1,ARC,TACO1,DAPK1,RHOQ,CACNA2D3,PCSK9,CAMK2D,CAB39,KCNRG,WWP2,F2,PTE…
positive regulation of substrate adhesion-dependent cell spreading	18	28	2.8	0.082	0.00558756	MDK,ILK,OLFM4,FLNA,CASS4,DNM2,UNC13D,DMTN,ARPC2,CIB1,APOA1,RAC1,ABL1,CDC42,MYOC,CRK,CRKL,RAC3
activation of innate immune response	19	30	2.7	0.082	0.00563741	CLEC7A,ZBP1,LYN,TBK1,SYK,SRC,PYCARD,FYN,PLCG2,IFI16,MNDA,HEXIM1,XRCC6,PSPC1,CREBBP,NONO,KIR2DS2,IKBKB,TLR4
regulation of inflammatory response to antigenic stimulus	19	30	2.7	0.082	0.00563741	ADCYAP1,LTA,LYN,BTK,SYK,SRC,FURIN,GPX1,PSMB4,FYN,KARS1,CD28,TREM2,SELENOS,IL12B,MAPK14,CD81,PARK7,FGR
long-chain fatty acid transport	19	30	2.7	0.082	0.00563741	PLA2G5,PLA2G10,PLA2G2C,SYK,CD36,RPS6KB1,PLA2G12A,AKT1,SLC27A2,PLA2G2A,AKT2,PLA2R1,ACE,PLA2G4A,ATP5PF,FABP3,FABP4,PLA2G12B,PLA2G1B
regulation of organic acid transport	19	30	2.7	0.082	0.00563741	PLA2G10,EDN1,ARL6IP5,SYK,AGT,MAP2K6,ARL6IP1,AKT1,AKT2,PLA2R1,FIS1,PLA2G4A,ATP5PF,KMO,SNCA,IL1B,PPARA,FABP3,LEP
purine nucleoside triphosphate biosynthetic process	20	32	2.6	0.082	0.00563869	TGFB1,NME2,IL4,PID1,ATP5PO,NME4,VCP,NME7,STAT3,PKLR,ENO1,ATP5F1B,NUDT2,ATP5PF,TREM2,PPARA,NME1,IMPDH1,VPS9D1,ALDOA
negative regulation of hormone secretion	20	32	2.6	0.082	0.00563869	EDN1,SFRP1,RAB11FIP3,SYTL4,INHBB,HADH,GJA1,PTPN11,FKBP1B,PPP3CA,NDUFAF2,IL1B,VSNL1,GHRL,INHA,OSM,ADIPOQ,FAM3D,INHBA,LEP
regulation of sodium ion transmembrane transport	20	32	2.6	0.082	0.00563869	NETO1,SNTA1,YWHAH,SLC9A3R1,ATP1B2,DNM2,SLMAP,ATP1B1,FGF12,ACTN4,PCSK9,CAMK2D,ARF1,GPD1L,SCN2B,TESC,FXYD6,WNK3,WNK1,COMMD1
positive regulation of catalytic activity	262	599	1.3	0.082	0.00565214	PRKCZ,CLEC7A,TCL1B,CD4,TNFSF10,TGFB1,SOD1,ADCYAP1,PLA2G5,CSF1,FCGR1A,JAK2,FGFR3,EDN1,ROCK2,ILK,SFRP1,CSK,NTRK2,KIT,PTK2B,RHOC,LYN,SERPINB3,XCL1,MAPRE3,ANTXR1,ARL6IP5,NEK7,EPHA10,RGS10,VAC14,TNKS,ARHGAP6,AGRN,MAPK8,ARHGAP45,ARF4,IL4,BMP2,RASA1,INSR,MAPK3,GSK3A,BCL2,PLEK,SYK,CTNNB1,STUB1,PDPK1,HSPA1A,GNAI3,TANK,SRC,STIM1,EPHA6,CRADD,CASS4,ERBB2,AGT,MAP2K6,ATP1B2,CSF1R,CAB39L,GDNF,AKT1,CCL13,F11R,CC…
negative regulation of intracellular signal transduction	116	248	1.4	0.082	0.00571506	SFRP5,NPPA,SFRP1,PPIF,CSK,LYN,SERPINB3,NPLOC4,SERPINE2,SLC9A3R1,BMP2,RASA1,GSK3A,BCL2,PLEK,CD22,HSPA1A,MINAR1,TANK,SRC,TRIM40,AGT,CPNE1,PTGS2,AKT1,THOC1,ZC3H12A,PTPN6,CDKN2D,TNFAIP3,GPX1,GSK3B,BMP4,HSPB1,PRKAA2,ABL2,PYCARD,TXNDC12,SMAD4,IGF1R,GBP1,HOMER2,DUSP3,ARHGAP25,UFD1,MCL1,PIN1,C1QTNF3,ARRB1,AKT1S1,PDE11A,CIB1,KCTD10,AIDA,MAD2L1BP,BCL2L1,PPM1A,DUSP16,LIMD1,RHOA,TGFB2,SPI1,RPS6KA6,FOXM1,ABL1…
establishment of organelle localization	76	155	1.5	0.082	0.00573903	PRKCZ,AP1AR,NPPA,CHMP1A,HDAC6,FER,RAB11A,FHOD1,DNM1,KIT,RAB1A,LYN,CHMP2B,BTK,SLC9A3R1,CHMP1B,IL4,SNX4,SYK,CTNNB1,RAC2,PDPK1,IKBKG,CBL,NTN1,GJA1,NEFL,YWHAZ,DNM2,SPAST,ARFGAP2,KPNB1,RHOT1,UNC13D,SEPTIN1,BLOC1S1,RAB3A,BLOC1S3,SAR1A,BICD1,VPS4A,KIF22,CHMP2A,ACTN4,CDC42,VPS4B,RAB6A,SNAP29,HMOX1,RAB11B,PEX14,RAN,RMDN1,S100A13,ARF1,PIK3CG,CHMP6,LGALS9,UBB,SNCA,NUDC,CDH3,LIN7A,KIF1C,NSFL1C,BICDL1,NDEL1,K…
regulation of intracellular protein transport	57	112	1.6	0.085	0.00595357	TGFB1,JAK2,PRKACA,LCP1,ZFAND1,NUCB1,FLNA,MAPK8,GSK3A,GRIPAP1,CD36,RAC2,ERBB2,PTPN11,PTGS2,ZC3H12A,AKT2,GSK3B,BMP4,FYN,SMAD3,DMTN,CIB1,NMT1,UFM1,RNF31,SAR1A,MAPK1,UBE2D3,SHH,HAX1,FIS1,CDC42,UBL5,BAG4,RAN,CSNK2A2,APOD,GZMB,MIEF1,ABLIM3,IL1B,NDEL1,CACNB3,RAB23,MAPK14,ATP5IF1,ADIPOQ,HTRA2,CD81,PARK7,GDI1,HCLS1,SFN,LEP,BCAP31,HSPA1L
neuron projection development	219	495	1.3	0.086	0.00604417	CRTAC1,PRKCZ,BSG,GFRA3,LST1,EFNB3,VIM,SOD1,ATF1,ADCYAP1,MDK,SULT4A1,PTN,JAK2,PLA2G10,KEL,HDAC6,SVBP,ILK,SFRP1,DBNL,PLXNA4,NTRK2,VASP,RAB11A,DCC,PTK2B,STK24,RAB21,LYN,CNTN4,INPP5F,NME2,SEMA3B,EPHA10,SCARB2,YWHAH,OPHN1,FLNA,SLC9A3R1,CNTN1,L1CAM,NECTIN1,SMURF1,ARF4,RTN4IP1,GAP43,GSK3A,BCL2,NCKIPSD,ROBO2,CTNNB1,RAC2,HGF,VAPA,LRRC4C,MINAR1,ENAH,NCK2,EPHA6,FGF8,ERBB2,HES5,AGT,CASP3,PLXNA1,CRABP2,NTN1,A…
regulation of multicellular organismal development	305	705	1.2	0.086	0.00605426	ISG15,PRKCZ,CD4,TGFB1,EFNB3,SOD1,ADCYAP1,MDK,CSF1,AHSG,PTN,BMP10,WARS1,COMP,LTA,SPINT1,EDN1,ROCK2,THBS4,IL12RB1,PGLYRP2,ILK,SFRP1,DBNL,PLXNA4,GPNMB,NTRK2,TGFB3,PRKCA,RAB11A,DCC,ID2,KIT,CTDSP1,PTK2B,UBASH3B,PAX8,RAB21,LYN,BTK,ADAM12,NAP1L1,AKT3,PRKCB,IL15RA,JAG1,HRG,PIM1,NME2,HGS,CLSTN3,SEMA3B,IFNL1,RRAS,ANGPTL4,CBLN2,YWHAH,SERPINE2,CXCL10,PPP1CC,ECM1,L1CAM,AGRN,ITGA5,ADAMTS1,GLUL,SRSF6,IFNB1,IL4,…
positive regulation of T-helper 1 type immune response	10	13	5.3	0.086	0.00605863	IL12RB1,XCL1,NLRP10,PLA2G4A,IL18R1,IL18,IL1B,IL27RA,IL12B,IL1R1
CD4-positive, alpha-beta T cell cytokine production	10	13	5.3	0.086	0.00605863	PRKCZ,XCL1,IFNB1,IL4,IL18R1,IL18,IL1B,IL1R1,CD81,IL6
muscle contraction	68	137	1.6	0.086	0.00609322	NPPA,SOD1,BMP10,SNTB1,COMP,EDN1,ROCK2,SNTA1,PRKACA,CALD1,KIT,MYL9,LTB4R,FLNA,SSPN,SMAD5,SPHK1,AGT,TMOD3,MAP2K6,GJA1,GDNF,PTGS2,GRK2,ZC3H12A,TPM4,SLMAP,HOMER1,STAC,PIK3CA,FKBP1B,TMEM38B,EHD3,ATP1B1,SETD3,TNNT2,FGF12,RHOA,ENO1,GSN,ANKRD2,TMOD2,MYL6,SMTN,CAMK2D,PIK3CG,TPM2,TMOD1,DAPK3,CNN1,GPD1L,SCN2B,GHRL,ARG2,STC1,CSRP3,MYL3,TTN,SRI,MYL5,MAP2K3,DES,ANXA6,MYBPC2,ALDOA,PROK2,CERT1,TNNI2
actomyosin structure organization	48	92	1.7	0.086	0.00610597	BMP10,EDN1,ROCK2,SFRP1,TGFB3,FHOD1,PDLIM1,CSRP2,PTK2B,RHOC,CSRP1,ARHGAP6,SRC,WAS,ZYX,TMOD3,CDC42BPB,F11R,PFN1,SMAD4,SMAD3,ARRB1,FLII,APOA1,RAC1,VPS4A,TNNT2,RHOA,PPFIA1,ABL1,CDC42,TMOD2,CNN2,BAG4,MYOC,EVL,PPM1F,TMOD1,CNN1,PRKAR1A,CDC42BPA,PDCD6IP,CSRP3,CUL3,TTN,CFLAR,EPHA1,RACGAP1
extrinsic apoptotic signaling pathway via death domain receptors	31	55	2	0.086	0.00612186	SFRP1,BCL2,HGF,CRADD,TNFAIP3,GPX1,GSK3B,TNFRSF10B,STK4,STX4,TRADD,BCL2L1,BAD,SPI1,RAF1,HMOX1,GABARAP,DIABLO,SKIL,PTEN,TNFRSF10A,FAIM,BMP5,BID,RFFL,STK3,PARK7,CFLAR,SERPINE1,TNFRSF1A,TIMP3
regulation of cysteine-type endopeptidase activity involved in apoptotic process	64	128	1.6	0.087	0.0062211	CLEC7A,TNFSF10,MICAL1,JAK2,ARL6IP5,MGMT,VIL1,SYK,HGF,SRC,CRADD,ARL6IP1,PTGS2,AKT1,CDKN2D,GPX1,PYCARD,SMAD3,RPS6KA3,ARRB1,VCP,RHOA,BAD,CSNK2A1,APAF1,GSN,FIS1,PML,CCN1,HSPD1,VEGFA,PRDX3,DAPK1,MAP2K5,CD27,RAF1,PIH1D1,HSF1,DIABLO,ROBO1,HSPE1,F3,LCK,BIRC2,AIFM1,PPM1F,TNFAIP8,MMP9,LGALS9,IGBP1,S100A9,SNCA,TNFSF15,BID,RFFL,HTRA2,PARK7,CFLAR,RACK1,CYCS,SFN,SERPINB9,NGFR,BCAP31
cell growth	122	263	1.4	0.091	0.00652438	PRKCZ,TGFB1,NPPA,BMP10,MAP2K4,HDAC6,EDN1,ILK,SFRP1,DBNL,PLXNA4,RAB11A,DCC,PTK2B,IP6K2,CEP43,RAB21,HRG,CLSTN3,SEMA3B,HDGFL2,SERPINE2,L1CAM,SMURF1,NUBP1,GSK3A,BCL2,CTNNB1,HSPA1A,MINAR1,SPHK1,ERBB2,TRIM40,AGT,PLXNA1,CRABP2,NTN1,GJA1,TSG101,CPNE1,GDF9,SH3GL2,AKT1,DNM2,CDKN2D,SEMA4G,GSK3B,POSTN,PPP1R9B,IMPACT,ISLR2,PDLIM5,SMAD4,ADAM15,SMAD3,SYT17,BDNF,EIF4G2,PIN1,RPS6KA3,HAMP,CIB1,SEMA6D,N6AMT1,PAK4,F…
cytokine-mediated signaling pathway	138	301	1.4	0.092	0.00659631	ISG15,IL22RA1,CD4,MX1,CSF1,ZBP1,CTSG,EDA2R,JAK2,EDN1,PRKACA,IL12RB1,ILK,FER,KIT,PTK2B,STAT6,XCL1,IL15RA,MMP12,OAS1,TOLLIP,IL22RA2,TBK1,CXCL10,ECM1,IFNB1,MAPK3,SYK,IFNW1,HSPA1A,SRC,SPHK1,CBL,IL10RA,CSF1R,CPNE1,PTPN11,IL1RL1,CXCL3,AKT1,IFNA4,CCL13,MPL,PTPN6,IL21R,IRF3,CCL22,TNFAIP3,CCL7,PLCB1,UBE2K,PYCARD,DOK1,CEBPA,SMAD4,CIB1,C1QTNF4,TRADD,APOA1,GHR,CNOT9,CXCL2,STAT3,IFNAR1,EIF5A,CXCL13,BAD,SPI1,A…
positive regulation of neurogenesis	59	117	1.6	0.093	0.00669189	TGFB1,MDK,PTN,LTA,SPINT1,ILK,DBNL,PLXNA4,NTRK2,RAB11A,ID2,KIT,RAB21,LYN,NAP1L1,SERPINE2,PPP1CC,L1CAM,BMP2,ROBO2,CTNNB1,PLXNA1,CRABP2,NTN1,NEFL,PLXNC1,ISLR2,NUMB,BDNF,EIF4G2,IST1,TGM2,NPTN,EPHA4,TWF2,CDH4,SHH,VEGFA,ROBO1,SKIL,CAMK2B,PTPRD,ETV5,IL1B,HES1,FAIM,MAP2K1,NDEL1,TNFRSF1B,HDAC2,FN1,IL6,PRKCI,ZFYVE27,GDI1,SLIT2,SLITRK1,PLXNB2,LRP1
regulation of receptor-mediated endocytosis	36	66	1.9	0.093	0.00670343	ITGAV,RAB21,DAB2,OPHN1,IL4,SMAP1,INSR,SYK,LDLRAP1,CBL,SH3GL2,DNM2,SFRP4,PICK1,NUMB,SH3GL3,ARRB1,PLCG2,RAC1,BICD1,HNRNPK,DLG4,ARC,VEGFA,TBC1D5,PCSK9,EGF,USP46,ARF1,CD2AP,FMR1,RSPO1,ADIPOQ,ANXA2,B2M,SERPINE1
regulation of cell morphogenesis	73	149	1.5	0.095	0.00686316	AP1AR,LST1,MDK,ARHGDIA,PTN,ILK,DBNL,PLXNA4,OLFM4,KIT,PTK2B,RHOC,RAB21,FLNA,SLC9A3R1,MYL12A,SMURF1,VIL1,RASA1,MYL12B,RAC2,SRC,CASS4,PLXNA1,CSF1R,PLXNC1,CCL13,MPL,DNM2,F11R,CCL7,POSTN,FYN,GBP1,UNC13D,SYT17,DMTN,ARPC2,CIB1,APOA1,RAC1,LIMD1,RHOA,EPHA4,ABL1,DLG4,ACTN4,ARC,CDC42,VEGFA,RHOQ,ENPP2,HEXB,MYOC,ZRANB1,CAMK2B,PTPRD,F2,CRK,DAPK3,CRKL,MSN,FN1,EZR,RAC3,COCH,RDX,SYT2,PLXNB2,FGR,ALDOA,DIAPH1,FBLIM1
positive regulation of cell growth	46	88	1.7	0.095	0.0068638	EDN1,ILK,SFRP1,DBNL,RAB11A,PTK2B,CEP43,HDGFL2,L1CAM,SMURF1,BCL2,SPHK1,ERBB2,CRABP2,NTN1,AKT1,ISLR2,SYT17,BDNF,EIF4G2,PIN1,RPS6KA3,HAMP,CIB1,N6AMT1,IST1,RHOA,TWF2,TGFB2,CSNK2A1,CDH4,CDC42,VEGFA,MAP2K5,F2,EIF4G1,S100A9,NDEL1,CXCL16,FN1,ZFYVE27,GDI1,PRSS2,SFN,SYT2,LRP1
regulation of cell shape	41	77	1.8	0.095	0.00691232	LST1,ARHGDIA,PTN,PLXNA4,KIT,PTK2B,RHOC,SLC9A3R1,MYL12A,VIL1,RASA1,MYL12B,RAC2,PLXNA1,CSF1R,PLXNC1,CCL13,F11R,CCL7,FYN,DMTN,RAC1,LIMD1,RHOA,VEGFA,RHOQ,HEXB,F2,CRK,DAPK3,MSN,FN1,EZR,RAC3,COCH,RDX,PLXNB2,FGR,ALDOA,DIAPH1,FBLIM1
regulation of protein localization to cell periphery	41	77	1.8	0.095	0.00691232	PRKCZ,TGFB1,CSK,LRRC15,RAB11A,DAB2,VIL1,PPP2R5A,GRIPAP1,LDLRAP1,PDPK1,RER1,MRAP,AKT1,PID1,PPP1R9B,STAC,NUMB,GBP1,LZTFL1,CIB1,STX4,NKD2,VPS4A,BCL2L1,GNAI1,PPFIA1,STX7,RHOQ,VTI1B,MRAP2,TREM2,DPP10,CSRP3,WNK3,EZR,CNPY4,PRKCI,RACK1,STX8,LRP1
cellular response to organic cyclic compound	118	254	1.4	0.095	0.00698212	TGFB1,SOD1,H2AZ1,ADCYAP1,ARHGDIA,PTN,JAK2,HDAC6,EDN1,ROCK2,PRKACA,SFRP1,PIM1,ARL6IP5,DAB2,KAT5,YWHAH,GRAMD1C,FLNA,SLC9A3R1,EIF4E,PENK,MGMT,SMAD5,IFNB1,BMP2,PAGR1,MAPK3,GSK3A,CTNNB1,GNAI3,SRC,CASP3,PTGS2,AKT1,ZC3H12A,DNM2,KDM4C,SIRT2,IRF3,GSK3B,BMP4,RBFOX2,PPP1R9B,IMPACT,KLF9,CEBPA,LGALS1,USP8,GOLPH3,DMTN,TMEM38B,HAMP,CCNA2,SULT1A3,UFM1,CTNNA1,TGM2,HMGA2,RALB,CNOT9,AIF1,GNAI1,MAPK1,STAT3,RHOA,ABL1…
platelet formation	7	8	11	0.095	0.00701959	MPIG6B,CASP3,PTPN11,MPL,PTPN6,ACTN1,CIB1
platelet morphogenesis	7	8	11	0.095	0.00701959	MPIG6B,CASP3,PTPN11,MPL,PTPN6,ACTN1,CIB1
organelle inheritance	7	8	11	0.095	0.00701959	VRK1,MAPK3,YWHAZ,VCPIP1,MAPK1,MAP2K1,MAP2K2
Golgi inheritance	7	8	11	0.095	0.00701959	VRK1,MAPK3,YWHAZ,VCPIP1,MAPK1,MAP2K1,MAP2K2
Bergmann glial cell differentiation	7	8	11	0.095	0.00701959	VIM,MAPK3,PTPN11,MAPK1,SHH,ABL1,MAP2K1
regulation of spindle assembly	7	8	11	0.095	0.00701959	CHMP1A,CHMP2B,CHMP1B,HSPA1A,DRG1,CHMP2A,VPS4B,HSPA1B
positive regulation of mitochondrial outer membrane permeabilization involved in apoptotic signaling pathway	7	8	11	0.095	0.00701959	MAPK8,GSK3A,GSK3B,NMT1,CHCHD10,GZMB,ATP5IF1
regulation of mitotic spindle assembly	7	8	11	0.095	0.00701959	CHMP1A,CHMP2B,CHMP1B,HSPA1A,DRG1,CHMP2A,VPS4B,HSPA1B
positive regulation of ATP biosynthetic process	7	8	11	0.095	0.00701959	IL4,PID1,VCP,STAT3,ENO1,TREM2,PPARA
response to organonitrogen compound	211	477	1.3	0.095	0.00705961	PRKCZ,BSG,TNFSF10,NPPA,VIM,SOD1,AHSG,PTN,JAK2,EDN1,ROCK2,PRKACA,SFRP1,CSK,NTRK2,FER,SNX5,DNM1,PTK2B,PRKAR2B,LYN,STAT6,PRKCB,MMP12,JAG1,NME2,NPLOC4,RGS10,FLNA,SLC9A3R1,INHBB,PENK,MGMT,SRSF6,GRB2,INSR,MAPK3,GSK3A,DERL1,SYK,CD36,CTNNB1,AHCYL1,STUB1,PDPK1,GNAI3,SRC,RPS6KB1,HADH,AGT,CASP3,EIF2B1,MARS1,GJA1,NEFL,PTPN11,PTGS2,AKT1,UBXN4,DNM2,FAF2,SIRT2,TNFAIP3,HOMER1,TNS2,PID1,YWHAG,AKT2,GSK3B,VWA2,PPP1…
proteolysis involved in cellular protein catabolic process	147	323	1.3	0.096	0.00712363	ISG15,PSMA2,CTSF,HDAC6,PRKACA,KLHL3,ANAPC7,ANAPC10,PTK2B,UBA7,CDK2,NPLOC4,DAB2,KAT5,TOLLIP,PSMA1,OPHN1,SMURF1,GSK3A,DERL1,FAP,USP4,CTNNB1,SNF8,STUB1,HSPA1A,UBE2D1,ATE1,CBL,TSG101,AKT1,UBXN4,MAPK9,FAF2,SIRT2,TNFAIP3,GPX1,UBE2K,WWP1,GSK3B,PSMB4,UBE2N,UBA6,CEBPA,USP8,USP12,UFD1,ASCC2,GIPC1,ARRB1,PSMD6,KCTD10,NEDD8,VCP,UBA1,UBE2D4,UBE2I,CUL4B,NKD2,PSMD11,VPS4A,UBL7,DNAJC10,SMURF2,UCHL5,NUDT15,UBE2D3,…
positive regulation of macrophage derived foam cell differentiation	11	15	4.3	0.096	0.00717009	PLA2G5,CSF1,PLA2G10,CD36,AGT,MAPK9,PLA2G2A,ALOX15B,LPL,NFKB1,IL18
regulation of proteasomal protein catabolic process	45	86	1.7	0.097	0.00727724	PRKACA,CDK2,DAB2,OPHN1,GSK3A,STUB1,HSPA1A,AKT1,MAPK9,SIRT2,GPX1,UBE2K,GSK3B,CEBPA,GIPC1,VCP,NKD2,UCHL5,NUDT15,SHH,DDRGK1,NUB1,ARAF,GABARAP,PSMC5,HSPA1B,SGTA,RAD23B,CAMLG,BAG6,TREM2,UBE2V2,UBB,GABARAPL2,USP14,STYX,FHIT,FMR1,PSMC3,ALAD,PSME2,PARK7,RACK1,UBQLN4,COMMD1,BCAP31
ureteric bud development	27	47	2.1	0.097	0.00728074	ILK,SFRP1,PAX8,SMAD5,BMP2,BCL2,ROBO2,CTNNB1,FGF8,AGT,GDNF,BMP4,SMAD2,CAT,SMAD4,SMAD3,BMPER,SHH,SMAD1,VEGFA,BMP7,HES1,CTNNBIP1,ARG2,BASP1,PKD2,SLIT2
mesonephric epithelium development	27	47	2.1	0.097	0.00728074	ILK,SFRP1,PAX8,SMAD5,BMP2,BCL2,ROBO2,CTNNB1,FGF8,AGT,GDNF,BMP4,SMAD2,CAT,SMAD4,SMAD3,BMPER,SHH,SMAD1,VEGFA,BMP7,HES1,CTNNBIP1,ARG2,BASP1,PKD2,SLIT2
mesonephric tubule development	27	47	2.1	0.097	0.00728074	ILK,SFRP1,PAX8,SMAD5,BMP2,BCL2,ROBO2,CTNNB1,FGF8,AGT,GDNF,BMP4,SMAD2,CAT,SMAD4,SMAD3,BMPER,SHH,SMAD1,VEGFA,BMP7,HES1,CTNNBIP1,ARG2,BASP1,PKD2,SLIT2
regulation of neuron death	91	191	1.5	0.098	0.00737071	SOD1,MDK,CSF1,JAK2,MAP2K4,ILK,GPNMB,NTRK2,TGFB3,DCC,PTK2B,INPP5A,RILPL1,TBK1,KIR3DL2,SNCG,RASA1,GSK3A,BCL2,CTNNB1,PDPK1,IKBKG,FGF8,CBL,CASP3,NEFL,GDNF,AKT1,AARS1,GSK3B,EIF2S1,FYN,PIK3CA,BDNF,NAE1,MCL1,MAP3K11,PIN1,ARRB1,AKT1S1,SULT1A3,GHR,BCL2L1,STAT3,NCOA7,RHOA,TGFB2,BAD,ABL1,FIS1,CDC42,LGMN,HSPD1,CNTFR,HMOX1,NTF4,CAPN2,HSF1,PCSK9,NONO,LANCL1,CCL5,AIFM1,TREM2,UBE2V2,UBB,EIF4G1,KMO,GRN,SNCA,G6PD,…
