# Supplementary material for: Pregnancy-specific responses to COVID-19 are revealed by high-throughput proteomics of human plasma
Source: Research Square preprint supplement (doi:10.21203/rs.3.rs-1906806/v1), 2022-08-22
Supplement: Supplementary file 6 [file b0a8ec427d9a3ed25defb21b.xlsx]

## Sheet: TableS7_
Supplementary Table 6. C2 pathways enriched among differentially regulated proteins in non-pregnant COVID-19 patients.
Name	Count	Size	OddsRatio	q	Pvalue	Genes
DIAZ_CHRONIC_MYELOGENOUS_LEUKEMIA_UP	359	696	2.1	1.04132e-15	2.00795e-19	PSMA2;BSG;TGFB1;SOD1;RUVBL1;CSF1;PRDX4;KEL;HDAC6;ITGA2B;ILK;MDH2;LRRFIP2;RAB11A;AK2;SNX5;HPGDS;ITGA2B;ANAPC10;TAGLN2;STK24;DSTN;PRKAR2B;IVD;LYN;BTK;FKBP3;COPB2;MYCBP;PIM1;CDK2;NT5C;ARL6IP5;SCARB2;RGS10;PSMA1;TBK1;SERPINE2;LYN;FLNA;PPP1CC;EIF4E;MATK;RBM39;TXNL1;ETNK1;DARS1;ARPC3;TBCB;XPNPEP1;ARF4;MDH2;RASA1;AASDHPPT;PGK1;ILF3;PPP2R5A;SNX4;CD36;AHCYL1;RAC2;VAPA;RBBP4;CHST2;GNAI3;RPN2;MBNL2;PACSIN2;…
HOUNKPE_HOUSEKEEPING_GENES	263	501	2.1	4.17936e-12	1.61178e-15	PSMA2;SOD1;RUVBL1;MRPS14;RAB7A;PCBP1;RAB11A;AK2;STK24;CHMP2B;NAP1L1;COPB2;HGS;NPLOC4;TOLLIP;TBK1;TNKS;PPP1CC;DDX19A;TXNL1;MAPRE1;DARS1;SRSF6;FAM160B1;TBCB;ARF4;NARS1;SMAP1;AASDHPPT;ILF3;GSK3A;PPP2R5A;DERL1;POFUT1;USP4;CTNNB1;SNF8;SNX12;RAB5A;SSR2;STUB1;PDPK1;UFC1;EIF4A1;RPN2;STIM1;PACSIN2;YARS1;EIF2B1;ARL6IP1;STUB1;RER1;PTPN11;AKT1;AARS1;POLR2K;FAF2;EIF3M;GET3;KHSRP;UBE2K;EIF2S1;PSMB4;ARFGAP2;TXN…
REACTOME_PLATELET_ACTIVATION_SIGNALING_AND_AGGREGATION	104	161	3.4	9.18624e-11	5.31406e-14	PRKCZ;TGFB1;SOD1;AHSG;KNG1;ABHD12;FERMT3;PLG;ITGA2B;CSK;TGFB3;PRKCA;ITGA2B;TAGLN2;LYN;PRKCB;HRG;CLEC3B;LYN;FLNA;ECM1;SYTL4;MPIG6B;GRB2;SERPINA3;MAPK3;ITIH4;PLEK;SYK;CD36;RAC2;HGF;PDPK1;GNAI3;SRC;SERPING1;TGFB1;PTPN11;YWHAZ;AKT1;MPL;PTPN6;ACTN1;SYK;ALB;VAV1;PFN1;FYN;CLEC1B;PIK3CA;PECAM1;LGALS3BP;ARRB1;LEFTY2;PLCG2;SRC;STX4;APOA1;RAC1;TAGLN2;GNAI1;MAPK1;AKT1;TIMP1;RHOA;CD109;TGFB2;F8;ACTN4;CDC42;VE…
WP_VEGFAVEGFR2_SIGNALING_PATHWAY	143	259	2.3	8.22488e-08	6.34391e-11	PRKCZ;BSG;PLA2G5;BMP10;MAP2K4;ROCK2;ITGAV;EWSR1;CSK;LRRFIP2;PRKCA;RAB11A;FHOD1;CSRP2;PTK2B;TNXB;RHOC;CSRP1;STAT6;NAP1L1;PRKCB;JAG1;HGS;EIF4E;RBM39;MAPK8;ADAMTS1;ARF4;GRB2;BMP2;PGK1;MAPK3;BCL2;CTNNB1;RAB5A;PDPK1;HSPA1A;SRC;CDH5;RPS6KB1;CBL;TMOD3;MAP2K6;GJA1;PTPN11;CLIC1;PTGS2;AKT1;MAPK9;PTPN6;DECR1;CDC42BPB;HSPA1A;GPX1;GSK3B;HSPB1;PRKAA2;ALB;MAPKAPK2;PFN1;FYN;PIK3CA;DOK1;SH3BGRL3;FLT1;NUMB;LRRC59;…
REACTOME_MEMBRANE_TRAFFICKING	144	265	2.2	2.27625e-07	2.51687e-10	CD4;RAB7A;RAB11A;SNX5;DNM1;RAB1A;RAB21;CHMP2B;AKT3;COPB2;CAPZA1;HGS;AP1S2;DAB2;RAB5C;SCARB2;ARF5;YWHAH;FTL;ARFIP2;FTH1;RAB6B;ARPC3;ARF4;KLC1;GRB2;VPS53;AP1G2;RAB5B;SNF8;LDLRAP1;RAB5A;TRIP10;SRC;PACSIN2;TRAPPC6B;CBL;GJA1;TSG101;CYTH3;YWHAZ;SH3GL2;AKT1;GRK2;DNM2;GGA1;CLINT1;YWHAG;AKT2;PRKAA2;ARFGAP2;RAB18;SH3GL3;MAN1C1;MAP1LC3B;AGFG1;DCTN6;TRAPPC2;ARPC2;TBC1D13;ARRB1;TBC1D20;BLOC1S1;RAB3A;RABEP1;BL…
KEGG_FOCAL_ADHESION	83	133	3	2.27625e-07	2.63353e-10	SHC4;COL11A2;COMP;ROCK2;ITGA2B;THBS4;ILK;ITGAV;VASP;PRKCA;ITGA2B;TNXB;MYL9;AKT3;PRKCB;THBS3;FLNA;PPP1CC;MYL12A;MAPK8;ITGA5;ITGA11;GRB2;MAPK3;BCL2;CTNNB1;MYL12B;RAC2;HGF;PDPK1;SRC;ZYX;ERBB2;AKT1;MAPK9;ACTN1;CHAD;AKT2;GSK3B;IBSP;VAV1;FYN;PIK3CA;IGF1R;FLT1;ARHGAP5;TLN2;SRC;GSK3B;PAK4;FLT4;RAC1;ITGAV;MAPK1;AKT1;RHOA;BAD;MYL7;ACTN4;ITGAV;CDC42;VEGFA;RAF1;CAPN2;ITGA2B;VWF;VEGFA;ITGAV;FLNA;EGF;MAPK10;BI…
WP_FOCAL_ADHESION	80	129	3	5.58146e-07	8.61004e-10	SHC4;COMP;ROCK2;ITGA2B;THBS4;ILK;ITGAV;VASP;PRKCA;ITGA2B;TNXB;MYL9;AKT3;PRKCB;THBS3;FLNA;PPP1CC;MYL12A;MAPK8;ITGA5;ITGA11;GRB2;MAPK3;BCL2;CTNNB1;MYL12B;RAC2;HGF;PDPK1;SRC;ZYX;ERBB2;AKT1;MAPK9;ACTN1;CHAD;AKT2;GSK3B;IBSP;VAV1;FYN;PIK3CA;IGF1R;FLT1;ARHGAP5;TLN2;SRC;GSK3B;PAK4;PAK6;RAC1;ITGAV;MAPK1;AKT1;RHOA;BAD;MYL7;ACTN4;ITGAV;CDC42;VEGFA;RAF1;CAPN2;ITGA2B;VWF;VEGFA;ITGAV;FLNA;EGF;MAPK10;BIRC2;PTEN…
IBRAHIM_NRF1_UP	115	205	2.4	8.06778e-07	1.40012e-09	PPIF;LRRFIP2;RAB1A;SCARB2;TBK1;SERPINE2;FTL;EIF4E;HARS1;ATP6V1C2;FTH1;MAPRE1;GRB2;NARS1;PWWP2B;GNAI3;RPN2;RPS6KB1;UBE2D1;YARS1;EIF2B1;HNRNPH1;PPIF;PTPN11;PES1;FAF2;NOP16;CLINT1;YWHAG;TNFRSF10B;EIF4H;SH3BGRL2;PFKFB3;MAP4K5;LRRC59;EIF4G2;MCL1;DNAJC11;PSMD6;RABEP1;SAMD4B;EIF2S2;FGFR1;IST1;HNRNPK;MLEC;MAPRE1;CCT5;DNAJC10;FXR1;GNPNAT1;CCT7;GFPT1;NACA;RTCA;SRPK1;PPFIA1;XRCC6;CCT8;NIP7;PDAP1;KARS1;YWHAG…
KEGG_ENDOCYTOSIS	67	104	3.3	1.07096e-06	2.06509e-09	PRKCZ;FGFR3;RAB11A;DNM1;KIT;CHMP2B;HGS;DAB2;RAB5C;RAB11FIP3;CHMP1B;SMURF1;SMAP1;RAB5B;SNF8;LDLRAP1;RAB5A;HSPA1A;SRC;CBL;TSG101;CSF1R;SH3GL2;RAB22A;GRK2;DNM2;HSPA1A;CSF1R;WWP1;ARFGAP2;IGF1R;FLT1;USP8;SH3GL3;ARRB1;PIP4K2B;RABEP1;SRC;EHD3;VTA1;VPS4A;SH3GL2;EPN1;HSPA1A;EHD1;AP2A2;SMURF2;HSPA6;PIP4K2B;CHMP2A;HLA-G;VPS28;CDC42;VPS4B;VPS25;HSPA1A;HSPA1A;RAB4A;RAB11B;HSPA1B;HSPA1A;EGF;HSPA1A;STAMBP;HSPA1…
PID_PDGFRB_PATHWAY	58	87	3.7	1.75387e-06	3.72013e-09	ARHGDIA;JAK2;MAP2K4;ITGAV;CSK;PRKCA;ARPC1B;LYN;YWHAH;LYN;SLC9A3R1;MAPK8;ARPC3;GRB2;RASA1;MAPK3;RAB5A;SRC;NCK2;SPHK1;CBL;PTPN11;YWHAZ;DNM2;MAPK9;YWHAG;FYN;PIK3CA;DOK1;ARPC2;PIN1;RPS6KA3;SRC;RAC1;PPP2R1A;ITGAV;ARPC5;MAPK1;STAT3;RHOA;GRB10;STAT3;ABL1;ACTN4;ITGAV;YWHAG;PLA2G4A;PTPN11;RAF1;YWHAH;RAB4A;ITGAV;LCK;YWHAB;MAPK10;STAT5A;PTEN;BRAF;PIK3CG;SHC1;CRK;MAP2K1;MAPK9;YWHAB;GAB1;SHC1;MAP2K2;SFN;FGR;L…
WP_KIT_RECEPTOR_SIGNALING_PATHWAY	37	48	6.1	2.37126e-06	5.48692e-09	JAK2;PRKCA;KIT;LYN;BTK;PRKCB;LYN;MATK;MAPK8;GRB2;MAPK3;BCL2;SRC;RPS6KB1;CBL;PTPN11;TEC;AKT1;PTPN6;VAV1;FYN;DOK1;RPS6KA3;SRC;BTK;MAPK1;AKT1;STAT3;BAD;GRB10;STAT3;PTPN11;KITLG;RAF1;MITF;STAT5A;SHC1;CRK;CRKL;MAP2K1;MAPK14;FOXO3;SHC1;MAP2K2
WANG_TUMOR_INVASIVENESS_UP	104	186	2.3	3.6727e-06	1.10116e-08	PSMA2;VIM;H2AZ1;ABCF3;RAB7A;PCBP1;AK2;CALD1;FKBP3;NAP1L1;GABBR1;DAB2;SRSF7;ANTXR2;GLUL;ARPC3;AP1G2;SYK;AGT;CRABP2;CIRBP;SYK;YWHAG;UBE2K;PSMB4;POSTN;KPNB1;EIF4H;KLF9;ATP6V1C1;ADH5;PTP4A2;ANXA7;HSD17B4;MAP1LC3B;EIF4G2;PIP4K2A;BLOC1S1;ANXA7;NEDD8;LRIG1;BRD2;SAMD4B;EIF2S2;SUB1;CCT5;AIMP1;EHD1;ARPC5;MAPRE2;EIF4B;NACA;POSTN;MDP1;EIF3B;ENO1;STX7;IL7R;ADD2;CCN1;NCL;CDC42;YWHAG;HSPD1;UBE2Q1;PPIA;YBX1;CNN2…
WP_PANCREATIC_ADENOCARCINOMA_PATHWAY	41	56	5	3.6727e-06	1.13311e-08	TGFB1;TGFB3;AKT3;MAPK8;MAPK3;RAC2;IKBKG;RPS6KB1;ERBB2;TGFB1;AKT1;MAPK9;AKT2;PIK3CA;SMAD2;SMAD4;SMAD3;PAK4;PAK6;RAC1;RALB;BCL2L1;MAPK1;AKT1;STAT3;RHOA;TGFB2;BAD;STAT3;CDC42;VEGFA;RAF1;ARAF;VEGFA;DUSP6;NFKB1;EGF;MAPK10;BRAF;RALA;MAP2K1;MAPK9;RAD51;IKBKB;VEGFA;RAC3;MAP2K2
PID_VEGFR1_2_PATHWAY	39	53	5.1	5.91625e-06	2.05346e-08	PRKACA;ITGAV;PRKCA;PTK2B;PRKCB;HGS;GRB2;MAPK3;CTNNB1;PDPK1;SRC;NCK2;CDH5;CBL;MAP2K6;PTPN11;AKT1;DNM2;PTPN6;PRKAA2;MAPKAPK2;FYN;PIK3CA;FLT1;SRC;CTNNA1;ITGAV;MAPK1;AKT1;RHOA;CTNNA1;GRB10;ITGAV;CDC42;VEGFA;PTPN11;RAF1;VEGFA;ITGAV;ARF1;BRAF;CTNNB1;MAP2K1;MAPK14;VEGFA;GAB1;MAP2K2;MAP2K3;VCL
KEGG_PANCREATIC_CANCER	36	48	5.4	8.15253e-06	3.14405e-08	TGFB1;TGFB3;AKT3;MAPK8;MAPK3;RAC2;IKBKG;ERBB2;TGFB1;AKT1;MAPK9;AKT2;PIK3CA;SMAD2;SMAD4;SMAD3;RAC1;RALB;BCL2L1;MAPK1;AKT1;STAT3;TGFB2;BAD;STAT3;CDC42;VEGFA;RAF1;ARAF;VEGFA;NFKB1;EGF;MAPK10;BRAF;PIK3CG;RALA;MAP2K1;MAPK9;RAD51;IKBKB;VEGFA;RAC3
PID_KIT_PATHWAY	35	47	5.3	1.28481e-05	6.6796e-08	JAK2;FER;KIT;LYN;LYN;MATK;MAPK8;GRB2;MAPK3;BCL2;PDPK1;RPS6KB1;CBL;PTPN11;TEC;AKT1;PTPN6;GSK3B;VAV1;PIK3CA;DOK1;GSK3B;AKT1;STAT3;BAD;GRB10;STAT3;PTPN11;KITLG;RAF1;CREBBP;MITF;STAT5A;PTEN;SHC1;CRKL;MAP2K1;FOXO3;GAB1;SHC1;MAP2K2
WP_RAS_SIGNALING	63	102	2.9	1.28481e-05	6.71823e-08	PLA2G5;SHC4;PLA2G10;PLA2G2C;FGFR3;PRKACA;NTRK2;PRKCA;KIT;AKT3;PRKCB;RRAS;RAB5C;MAPK8;GRB2;RASA1;INSR;MAPK3;RAB5B;RAC2;RAB5A;IKBKG;CSF1R;PTPN11;PLA2G12A;AKT1;MAPK9;PLA2G2A;AKT2;CSF1R;ABL2;PIK3CA;IGF1R;FLT1;STK4;PLCG2;PAK4;PAK6;FGFR1;FLT4;RAC1;RALB;BCL2L1;MAPK1;AKT1;RHOA;BAD;ABL1;CDC42;PLA2G4A;PTPN11;RAF1;NFKB1;MAPK10;MRAS;SHC1;RALA;MAP2K1;MAPK9;IKBKB;GAB1;RAC3;SHC1;MAP2K2;GNGT2;PLA2G12B;PLA2G1B;NG…
PID_ERBB1_DOWNSTREAM_PATHWAY	43	62	4.1	1.28481e-05	6.85422e-08	PRKCZ;ATF1;MAP2K4;PRKCA;ARPC1B;YWHAH;MAPK8;ARPC3;ARF4;GRB2;MAPK3;RAB5A;PDPK1;SRC;YWHAZ;AKT1;MAPK9;YWHAG;PIK3CA;ARPC2;RPS6KA3;SRC;RAC1;PPP2R1A;BCL2L1;ARPC5;MAPK1;AKT1;STAT3;BAD;STAT3;CDC42;YWHAG;SMAD1;MAP2K5;RAF1;CAPN2;YWHAH;DUSP6;EGF;YWHAB;BRAF;RALA;MAP2K1;MAPK9;YWHAB;MYLPF;GAB1;MAP2K2;SFN
REACTOME_ENDOSOMAL_SORTING_COMPLEX_REQUIRED_FOR_TRANSPORT_ESCRT	16	16	Inf	1.28481e-05	6.93688e-08	CHMP2B;HGS;SNF8;TSG101;VTA1;VPS4A;CHMP2A;VPS28;VPS4B;VPS25;RPS27A;CHMP6;UBB;UBC;MVB12B;CHMP4A
WP_FRAGILE_X_SYNDROME	45	66	3.9	1.35943e-05	7.6019e-08	PRKACA;NTRK2;PRKCA;DNM1;EIF4E;GRB2;EIF4A1;SRC;RPS6KB1;PTPN11;AKT1;DNM2;HOMER1;PLCB1;FYN;PICK1;SH3GL3;DUSP3;BDNF;PPP3CA;AKT1S1;SRC;MKNK1;MAPK1;AKT1;EPHA4;EPHA4;DLG4;ARC;PTPN11;RAF1;ARAF;CAMK2B;RAP1GAP;PTEN;BRAF;SHC1;PDK1;MMP9;EIF4G1;PRKAR1A;FMR1;MAP2K1;EEF1A1;AGAP2;GAB1;AP2B1;EEF1A1;SHC1;MAP2K2;BDNF;AGO2
KEGG_MAPK_SIGNALING_PATHWAY	88	157	2.3	2.22014e-05	1.28431e-07	TGFB1;PLA2G5;PLA2G10;PLA2G2C;MAP2K4;FGFR3;FGF22;PRKACA;NTRK2;TGFB3;PRKCA;AKT3;PRKCB;FGF3;RRAS;FLNA;MAPK8;GRB2;RASA1;MAPK3;FGF5;RAC2;IKBKG;HSPA1A;FGF8;CASP3;MAP2K6;TGFB1;PLA2G12A;AKT1;MAPK9;PLA2G2A;HSPA1A;AKT2;HSPB1;MAPKAPK2;MAPKAPK3;STK4;DUSP3;BDNF;PPP3CA;MAP3K11;RPS6KA3;ARRB1;FGFR1;RAC1;ELK4;HSPA1A;MKNK1;PPM1A;DUSP16;MAPK1;AKT1;FGF12;HSPA6;TGFB2;RPS6KA6;LAMTOR3;CDC42;PLA2G4A;MAP2K5;HSPA1A;RAF1;N…
SIG_BCR_SIGNALING_PATHWAY	26	32	7.9	2.69605e-05	1.66359e-07	BLNK;CSK;LYN;BTK;AKT3;LYN;GRB2;MAPK3;GSK3A;BCL2;CR2;SYK;CD22;PDPK1;AKT1;SYK;AKT2;GSK3B;VAV1;PIK3CA;PPP3CA;PLCG2;BTK;GSK3B;MAPK1;AKT1;BAD;RAF1;NR0B2;SHC1;SHC1;CD81
REACTOME_BUDDING_AND_MATURATION_OF_HIV_VIRION	15	15	Inf	2.96997e-05	1.94715e-07	CHMP2B;TSG101;VTA1;VPS4A;CHMP2A;VPS28;VPS4B;PPIA;RPS27A;CHMP6;UBB;UBC;PDCD6IP;MVB12B;CHMP4A
KEGG_FC_EPSILON_RI_SIGNALING_PATHWAY	41	60	3.9	3.79856e-05	2.63687e-07	PLA2G5;PLA2G10;PLA2G2C;MAP2K4;PRKCA;LYN;BTK;AKT3;PRKCB;LYN;MAPK8;IL4;GRB2;MAPK3;SYK;RAC2;PDPK1;MAP2K6;PLA2G12A;AKT1;MAPK9;PLA2G2A;SYK;AKT2;VAV1;FYN;PIK3CA;PLCG2;BTK;RAC1;MAPK1;AKT1;PLA2G4A;RAF1;MAPK10;PIK3CG;MAP2K1;MAPK9;IL5;MAPK14;FCER1A;RAC3;MAP2K2;MAP2K3;PLA2G12B;PLA2G1B
WP_TRANSLATION_INHIBITORS_IN_CHRONICALLY_ACTIVATED_PDGFRA_CELLS	28	36	6.3	4.01047e-05	3.01597e-07	MAP2K4;PRKACA;PRKCA;AKT3;PIM1;EIF4E;MAPK8;MAPK3;EIF4A1;RPS6KB1;MAP2K6;AKT1;MAPK9;AKT2;PIK3CA;EIF4A2;EIF4A2;MAPK1;AKT1;EIF4B;CSNK2A1;MAP2K5;MAPK10;PIK3CG;PDK1;EIF4G1;MAP2K1;MAPK9;MAPK14;MAP2K2;MAP2K3
WP_CHROMOSOMAL_AND_MICROSATELLITE_INSTABILITY_IN_COLORECTAL_CANCER	34	47	4.7	4.34033e-05	3.34773e-07	TGFB1;TGFB3;DCC;AKT3;TBK1;MAPK8;MAPK3;BCL2;CTNNB1;RAC2;CASP3;NTN1;TGFB1;PTGS2;AKT1;MAPK9;AKT2;GSK3B;SMAD2;NTN1;SMAD4;SMAD3;GSK3B;RAC1;RALB;MAPK1;AKT1;RHOA;TGFB2;BAD;RAF1;ARAF;MAPK10;BRAF;CTNNB1;RALA;MAP2K1;MAPK9;RAC3;CYCS
KEGG_VASCULAR_SMOOTH_MUSCLE_CONTRACTION	30	40	5.4	5.51209e-05	4.57038e-07	PLA2G5;PLA2G10;PLA2G2C;ROCK2;PRKACA;PRKCA;CALD1;MYL9;PRKCB;PPP1CC;MAPK3;PLA2G12A;PLA2G2A;PLCB1;IRAG1;PPP1R14A;MAPK1;RHOA;ARHGEF1;PLA2G4A;RAF1;ARAF;PRKCQ;MYL6;BRAF;MAP2K1;GNAQ;MAP2K2;PLA2G12B;PLA2G1B
PID_FCER1_PATHWAY	30	40	5.4	5.51209e-05	4.57038e-07	MAP2K4;FER;LYN;BTK;PRKCB;LYN;MAPK8;GRB2;RASA1;MAPK3;SYK;IKBKG;SPHK1;CBL;PTPN11;AKT1;SYK;VAV1;FYN;PIK3CA;DOK1;BTK;MAPK1;AKT1;PLA2G4A;PTPN11;RAF1;NFKB1;SHC1;MAP2K1;IKBKB;FCER1A;SHC1;MAP2K2;HCLS1;PLA2G1B
WP_AGERAGE_PATHWAY	39	57	3.9	5.79159e-05	4.9138e-07	PRKCZ;SOD1;JAK2;PRKCA;PRKCB;INHBB;MAPK8;INSR;MAPK3;SRC;CASP3;AKT1;MAPK9;SMAD2;SMAD3;SRC;RAC1;MAPK1;AKT1;STAT3;INHBB;RHOA;TIRAP;STAT3;CDC42;PLA2G4A;RAF1;DDOST;IRAK4;NFKB1;STAT5A;SHC1;MMP9;MMP2;MAP2K1;MSN;MAPK9;MAPK14;MMP7;IKBKB;EZR;SHC1;NCF1;CYCS;DIAPH1
KEGG_COLORECTAL_CANCER	31	42	5.1	6.08596e-05	5.36178e-07	TGFB1;TGFB3;DCC;AKT3;MAPK8;MAPK3;BCL2;CTNNB1;RAC2;CASP3;TGFB1;AKT1;MAPK9;AKT2;GSK3B;PIK3CA;SMAD2;SMAD4;SMAD3;GSK3B;RAC1;MAPK1;AKT1;RHOA;TGFB2;BAD;RAF1;ARAF;MAPK10;BRAF;PIK3CG;CTNNB1;MAP2K1;MAPK9;RAC3;CYCS
PID_CXCR4_PATHWAY	42	63	3.6	6.08596e-05	5.39826e-07	PRKCZ;CD4;JAK2;ITGAV;CSK;DNM1;PTK2B;RHOC;LYN;HGS;LYN;ITGA5;ITGA11;PDPK1;GNAI3;SRC;PTPN11;AKT1;GRK2;PTPN6;PLCB1;VAV1;FYN;PIK3CA;SRC;RAC1;VPS4A;RALB;GNAI1;ITGAV;AKT1;STAT3;RHOA;BAD;STAT3;ITGAV;RGS1;CDC42;VPS4B;PTPN11;ITGAV;LCK;STAT5A;PTEN;PIK3CG;CRK;MMP9;ITGA11;RACK1;ITGA1;FGR
SIG_PIP3_SIGNALING_IN_B_LYMPHOCYTES	20	23	12.1	6.21035e-05	5.71378e-07	DAPP1;LYN;BTK;AKT3;LYN;SYK;PDPK1;RPS6KB1;CYTH3;TEC;AKT1;SYK;AKT2;VAV1;PIK3CA;RPS6KA3;PLCG2;BTK;AKT1;NR0B2;PHF11;PTEN;FOXO3;GAB1
WP_CHEMOKINE_SIGNALING_PATHWAY	56	92	2.8	7.59842e-05	7.17938e-07	PRKCZ;SHC4;JAK2;CCL27;ROCK2;CSK;PTK2B;LYN;AKT3;XCL1;PRKCB;LYN;CXCL10;GRB2;MAPK3;RAC2;IKBKG;GNAI3;WAS;CXCL3;AKT1;GRK2;CCL22;CCL7;PLCB1;AKT2;GSK3B;VAV1;PIK3CA;CCL7;ARRB1;GSK3B;RAC1;GNAI1;MAPK1;AKT1;STAT3;CXCL13;CCL22;CXCL13;STAT3;CDC42;CCL26;RAF1;NFKB1;CCL5;BRAF;PIK3CG;SHC1;CRK;CXCL3;CCL1;CXCL11;CRKL;MAP2K1;CXCL16;GRK5;FOXO3;IKBKB;CCL17;SHC1;NCF1;GNGT2;CCL15;CCL5;FGR
KEGG_CHEMOKINE_SIGNALING_PATHWAY	64	109	2.6	7.67985e-05	7.4044e-07	PRKCZ;SHC4;JAK2;CCL27;ROCK2;PRKACA;CSK;PTK2B;LYN;AKT3;XCL1;PRKCB;LYN;CXCL10;GRB2;MAPK3;GSK3A;RAC2;IKBKG;GNAI3;WAS;CXCL3;AKT1;CCL13;GRK2;CCL22;CCL7;PLCB1;AKT2;GSK3B;VAV1;PIK3CA;CCL7;ARRB1;GSK3B;RAC1;CXCL2;GNAI1;MAPK1;AKT1;STAT3;CXCL13;RHOA;CCL22;CXCL13;STAT3;CDC42;CCL26;CXCL2;RAF1;NFKB1;CCL23;CXCL6;CCL5;BRAF;PIK3CG;SHC1;CRK;CXCL3;CCL1;CXCL11;CRKL;MAP2K1;CXCL16;GRK5;CCL8;FOXO3;IKBKB;CCL17;SHC1;NCF1…
REACTOME_RESPONSE_TO_ELEVATED_PLATELET_CYTOSOLIC_CA2	61	103	2.6	8.89073e-05	8.91473e-07	TGFB1;SOD1;AHSG;KNG1;FERMT3;PLG;ITGA2B;TGFB3;PRKCA;ITGA2B;TAGLN2;PRKCB;HRG;CLEC3B;FLNA;ECM1;SYTL4;SERPINA3;ITIH4;PLEK;CD36;HGF;SERPING1;TGFB1;ACTN1;ALB;PFN1;PECAM1;LGALS3BP;LEFTY2;STX4;APOA1;TAGLN2;TIMP1;CD109;TGFB2;F8;ACTN4;VEGFA;PPIA;ITGA2B;MANF;VWF;VEGFA;TIMP1;VTI1B;FLNA;A2M;SERPINA1;EGF;ITIH3;SERPINA4;SERPINA4;CAP1;LEFTY2;KNG1;SELP;FAM3C;CFD;TMX3;FN1;APLP2;TTN;HSPA5;VEGFA;VCL;SERPINE1;OLA1;AN…
PID_MET_PATHWAY	37	54	4	8.96429e-05	9.16134e-07	PRKCZ;MAP2K4;HGS;EIF4E;MAPK8;GRB2;MAPK3;CTNNB1;RAB5A;HGF;PDPK1;SRC;NCK2;CBL;PTPN11;SH3GL2;AKT1;AKT2;KPNB1;PIK3CA;NUMB;AKT1S1;SRC;PAK4;CTNNA1;RAC1;SH3GL2;MAPK1;AKT1;RHOA;BAD;CTNNA1;CDC42;PTPN11;RAF1;SHC1;CRK;CTNNB1;CRKL;MAP2K1;GAB1;SHC1;PRKCI;MAP2K2
WP_MAPK_SIGNALING_PATHWAY	80	145	2.2	0.000109639	1.14164e-06	TGFB1;MAP2K4;FGFR3;FGF22;PRKACA;NTRK2;TGFB3;PRKCA;AKT3;FGF3;RRAS;FLNA;MAPK8;GRB2;RASA1;MAPK3;FGF5;RAC2;IKBKG;HSPA1A;FGF8;CASP3;MAP2K6;TGFB1;AKT1;MAPK9;HSPA1A;AKT2;HSPB1;MAPKAPK2;MAPKAPK3;STK4;DUSP3;BDNF;PPP3CA;MAP3K11;RPS6KA3;ARRB1;FGFR1;RAC1;ELK4;HSPA1A;MKNK1;PPM1A;DUSP16;MAPK1;AKT1;FGF12;HSPA6;TGFB2;LAMTOR3;CDC42;PLA2G4A;MAP2K5;HSPA1A;RAF1;NTF4;ARAF;HSPA1A;CACNA2D3;DUSP6;HSPA1B;NFKB1;HSPA1A;FLN…
REACTOME_RHO_GTPASE_EFFECTORS	68	119	2.4	0.000126515	1.34175e-06	H2BU1;H2BC21;H2BC12;H2BC21;PRKCZ;H2AZ1;PRC1;ROCK2;PRKCA;ZWINT;ARPC1B;RHOC;BTK;MYL9;PRKCB;YWHAH;FLNA;PPP1CC;MAPRE1;ARPC3;KLC1;GRB2;MAPK3;PPP2R5A;NCKIPSD;CTNNB1;MYL12B;RAC2;PDPK1;SRC;WAS;YWHAZ;KDM4C;YWHAG;H3C1;PFN1;ARPC2;PIN1;PPP1R14A;SRC;DYNC1LI2;BTK;CTNNA1;RAC1;MAPRE1;PPP2R1A;ARPC5;MAPK1;RHOA;B9D2;CTNNA1;ABL1;DLG4;CDC42;YWHAG;RHOQ;YWHAH;MYL6;NSL1;FLNA;YWHAB;EVL;KLK3;PIK3C3;CTNNB1;TAX1BP3;S100A9;N…
REACTOME_HCMV_LATE_EVENTS	19	22	11.5	0.000129752	1.40111e-06	H2BU1;H2AC1;H2BC21;H2AW;H2BC12;H2BC21;H2AC11;CHMP1A;CHMP2B;SNF8;TSG101;H3C1;HNRNPK;VPS4A;CHMP2A;VPS28;VPS25;CHMP6;MVB12B;CHMP4A
ZHU_CMV_ALL_UP	43	67	3.3	0.000168989	1.88996e-06	ISG15;ISG15;PSMA2;MX1;WARS1;ENO2;PIM1;OAS1;ENO2;SCARB2;CXCL10;SRSF7;EIF4E;IFNB1;NUBP1;HSPA1A;EIF4A1;PTGS2;POLR2K;TNFAIP3;HSPA1A;ATP6V1C1;PDP1;GBP1;PSMD6;FGFR1;SNRPA1;SAR1A;HSPA1A;ENO1;RIPK1;PML;IL7R;LGMN;RANBP1;PLA2G4A;HSPA1A;HSPA1A;MANF;HSPA1B;NFKB1;HSPA1A;HSPE1;HSPA1A;CCL5;GCH1;HSPA1A;LGMN;SAR1A;PNP;PNP;SNRPB2;UBE2S;IL6;STIP1;CCL5;EIF5
REACTOME_RESPONSE_OF_MTB_TO_PHAGOCYTOSIS	15	16	27.1	0.00018238	2.0749e-06	CTSG;RAB7A;HGS;PGK1;MAPK3;GSK3A;RAB5A;KPNB1;DUSP16;MAPK1;ENO1;RPS27A;KPNA1;UBB;UBC
KEGG_NEUROTROPHIN_SIGNALING_PATHWAY	52	86	2.8	0.000205459	2.37708e-06	ARHGDIA;SHC4;CSK;NTRK2;AKT3;YWHAH;MAPK8;GRB2;MAPK3;BCL2;PDPK1;PTPN11;YWHAZ;AKT1;MAPK9;YWHAG;AKT2;GSK3B;MAPKAPK2;PIK3CA;BDNF;RPS6KA3;PLCG2;GSK3B;RAC1;MAPK1;AKT1;RHOA;BAD;RPS6KA6;ABL1;ARHGDIB;CDC42;YWHAG;MAP2K5;PTPN11;RAF1;NTF4;YWHAH;IRAK4;NFKB1;CAMK2D;CAMK2B;YWHAB;MAPK10;BRAF;PIK3CG;SHC1;CRK;CRKL;MAP2K1;MAPK9;YWHAB;MAPK14;FOXO3;IKBKB;GAB1;SHC1;MAP2K2;NGFR;BDNF
PID_CDC42_PATHWAY	30	42	4.5	0.000219694	2.58414e-06	PRKCZ;ARHGDIA;MAP2K4;ARPC1B;MAPK8;ARPC3;MAPK3;CTNNB1;SRC;ENAH;RPS6KB1;HES5;CBL;MAP2K6;MAPK9;GSK3B;PIK3CA;ARPC2;MAP3K11;SRC;GSK3B;PAK4;CTNNA1;RAC1;ARPC5;MAPK1;CTNNA1;CDC42;RAF1;BRAF;CTNNB1;CDC42BPA;MAPK9;MAPK14;MAP2K3
REACTOME_TRANSLATION	57	97	2.6	0.000239931	2.86844e-06	MRPS14;WARS1;WARS2;EIF4E;HARS1;DARS1;NARS1;SSR2;EIF4A1;RPN2;YARS1;EIF2B1;MARS1;AARS1;EIF3M;DARS2;EIF2S1;GSPT2;EIF4H;EIF4A2;TARS1;EIF4A2;EIF2S2;N6AMT1;MRPL12;EEF1E1;MTIF3;AIMP1;VARS1;EIF4B;MRPL1;RPS12;EIF3B;EIF3G;KARS1;EEF1D;DDOST;TRMT112;RPS27A;MRPL10;MRRF;SARS2;GARS1;EIF3J;MRPL55;EIF4G1;CARS1;EEF1G;EEF1A1;SARS1;RPS25;EEF1A1;RPN1;RPS10;RPL26L1;MRPL21;SRP19;RPL5;EIF5
WP_INSULIN_SIGNALING	56	95	2.6	0.000251437	3.05448e-06	PRKCZ;MAP2K4;PRKCA;PRKCB;EIF4E;MAPK8;GRB2;INSR;MAPK3;GSK3A;RAC2;PDPK1;RPS6KB1;CBL;MAP2K6;CYTH3;PTPN11;AKT1;MAPK9;AKT2;GSK3B;PRKAA2;PIK3CA;MAP4K5;IGF1R;MAP3K11;RPS6KA3;GSK3B;STX4;RAC1;EHD1;MAPK1;AKT1;RPS6KA6;GRB10;MAP2K5;PTPN11;RAF1;PRKCQ;RHOQ;RAB4A;MAPK10;INPP4A;PTEN;ARF1;PIK3CG;SHC1;PIK3C3;CRK;CAP1;MAP2K1;MAPK9;KIF3A;MAPK14;FOXO3;IKBKB;GAB1;SHC1;PRKCI;MAP2K2;MAP2K3
WP_EGFEGFR_SIGNALING_PATHWAY	58	100	2.5	0.000329639	4.19517e-06	PRKCZ;ATF1;JAK2;CSK;PRKCA;DNM1;PTK2B;PRKCB;HGS;DOK2;MAPK8;GRB2;RASA1;RAB5A;PDPK1;DOK2;SRC;NCK2;RPS6KB1;ERBB2;CBL;GJA1;PTPN11;SH3GL2;AKT1;MAPK9;VAV1;USP8;SH3GL3;RPS6KA3;SRC;NEDD8;RAC1;ELK4;SH3GL2;EPN1;RALB;MAPK1;AKT1;STAT3;GRB10;STAT3;ABL1;ARHGEF1;CDC42;MAP2K5;PTPN11;RAF1;EGF;STAMBP;STAT5A;PTEN;BRAF;SHC1;CRK;CRKL;RALA;MAP2K1;MAPK9;MAPK14;EPS15L1;GAB1;AP2B1;SHC1;PRKCI;MAP2K2
REACTOME_SPRY_REGULATION_OF_FGF_SIGNALING	12	12	Inf	0.000332823	4.29987e-06	GRB2;MAPK3;SRC;CBL;PTPN11;SRC;PPP2R1A;MKNK1;MAPK1;PTPN11;RPS27A;BRAF;UBB;UBC
WP_SEROTONIN_HTR1_GROUP_AND_FOS_PATHWAY	16	18	14.5	0.000358007	4.69427e-06	MAPK3;PDPK1;GNAI3;MAP2K6;MAPKAPK2;MAPKAPK3;PIK3CA;ELK4;GNAI1;MAPK1;RHOA;BRAF;MAP2K1;MAPK14;MAP2K2;MAP2K3
SA_PTEN_PATHWAY	14	15	25.3	0.000399343	5.47027e-06	ILK;PTK2B;AKT3;GRB2;MAPK3;PDPK1;AKT1;AKT2;PIK3CA;MAPK1;AKT1;PTEN;SHC1;BPNT1;RBL2;SHC1
REACTOME_M_PHASE	70	127	2.2	0.000399343	5.54429e-06	H2BU1;H2BC21;H2BC12;H2BC21;PSMA2;H2AZ1;PRKACA;PRKCA;ANAPC7;ANAPC10;ZWINT;PRKAR2B;RAB1A;CEP43;VRK1;CHMP2B;PRKCB;NEK7;PSMA1;PPP1CC;MAPRE1;MAPK3;PPP2R5A;UBE2D1;SIRT2;SPAST;YWHAG;H3C1;PSMB4;KPNB1;LMNB1;ENSA;CEP41;PSMD6;DYNC1LI2;UBE2I;IST1;PSMD11;NME7;MAPRE1;PPP2R1A;VPS4A;MAPK1;RAB2A;CSNK2A1;B9D2;CHMP2A;TMPO;YWHAG;RAB1B;RAB2A;PSMC5;SIRT2;NSL1;RPS27A;RAN;CSNK2A2;USO1;CHMP6;UBB;UBC;NUDC;PSMB1;UBE2C;DYNL…
WP_INTEGRINMEDIATED_CELL_ADHESION	40	63	3.2	0.000448088	6.39386e-06	ROCK2;ITGA2B;ILK;ITGAV;CSK;VASP;ITGA2B;AKT3;ITGA5;ITGA11;GRB2;RAC2;PDPK1;SRC;ZYX;MAP2K6;AKT1;AKT2;FYN;SRC;PAK4;PAK6;RAC1;ITGAV;MAPK1;AKT1;ITGAV;CDC42;MAP2K5;ITGAL;RAF1;ARAF;CAPN2;ITGA2B;ITGAV;MAPK10;CAPN1;BRAF;SHC1;CRK;MAP2K1;ITGA11;RAC3;SHC1;MAP2K2;MAP2K3;ITGB7;VCL;ITGA1
PID_ENDOTHELIN_PATHWAY	24	32	5.4	0.000453217	6.72922e-06	JAK2;EDN1;PRKCA;PTK2B;PRKCB;MAPK8;MAPK3;GNAI3;SRC;AKT1;PLCB1;SRC;RAC1;GNAI1;MAPK1;AKT1;RHOA;CDC42;PLA2G4A;RAF1;PRKCQ;CRK;MAP2K1;MAPK14;GNAQ;MAP2K2
WP_CARDIAC_HYPERTROPHIC_RESPONSE	27	38	4.4	0.000630846	9.73152e-06	TGFB1;NPPA;MAP2K4;PRKCA;MAPK8;MAPK3;PDPK1;IKBKG;MAP2K6;TGFB1;AKT1;PLA2G2A;AKT2;GSK3B;PPP3CA;GSK3B;RAC1;MAPK1;AKT1;MAP2K5;RAF1;NFKB1;CAMK2D;EGF;MAP2K1;MAPK14;IKBKB;MAP2K2;MAP2K3;TNFRSF1A
KEGG_REGULATION_OF_ACTIN_CYTOSKELETON	67	122	2.2	0.000656405	1.03292e-05	FGFR3;FGF22;ROCK2;ITGA2B;ITGAV;CSK;ITGA2B;ARPC1B;MYL9;FGF3;RRAS;PPP1CC;MYL12A;ITGA5;ARPC3;ITGA11;MAPK3;FGF5;MYL12B;RAC2;ENAH;WAS;FGF8;ACTN1;VAV1;PFN1;PIK3CA;ARPC2;PIP4K2B;PIP4K2A;PAK4;FGFR1;RAC1;ITGAV;ARPC5;MAPK1;FGF12;RHOA;PIP4K2B;MYL7;ACTN4;GSN;ITGAV;ARHGEF1;CDC42;GSN;ITGAL;RAF1;ARAF;ITGA2B;ITGAV;EGF;F2;MRAS;BRAF;PIK3CG;CRK;CRKL;FGF19;MAP2K1;MSN;FGF19;FGF18;PDGFC;FN1;MYLPF;ITGA11;EZR;RAC3;MAP2K…
WP_REGULATION_OF_ACTIN_CYTOSKELETON	51	87	2.6	0.000656405	1.04436e-05	FGFR3;FGF22;ROCK2;CSK;FGF3;RRAS;VIL1;MAPK3;FGF5;RAC2;ENAH;WAS;FGF8;ACTN1;VAV1;PFN1;PIK3CA;PIP4K2B;PIP4K2A;PAK4;PAK6;FGFR1;RAC1;ARPC5;MAPK1;FGF12;RHOA;PIP4K2B;GSN;ARHGEF1;CDC42;GSN;RAF1;EGF;F2;MRAS;BRAF;PIK3CG;PIK3C3;CRK;FGF19;MAP2K1;MSN;FGF19;MYL3;FGF18;FN1;EZR;RAC3;MAP2K2;VCL;RDX;ITGA1;DIAPH1
REACTOME_RAB_GERANYLGERANYLATION	28	40	4.2	0.000656405	1.05055e-05	RAB7A;RAB11A;RAB1A;RAB21;RAB5C;RAB6B;RAB5B;RAB3D;RAB3C;RAB5A;RAB4B;RAB22A;RAB18;PTP4A2;RAB3D;RAB3A;RAB13;RAB32;RAB2A;RAB8B;RAB6A;RAB1B;RAB2A;RAB4A;RAB11B;RAB14;RAB31;RAB33A;RAB24;RAB23
REACTOME_CYTOSOLIC_TRNA_AMINOACYLATION	15	17	13.5	0.000725855	1.1757e-05	WARS1;HARS1;DARS1;NARS1;YARS1;MARS1;AARS1;TARS1;EEF1E1;AIMP1;VARS1;KARS1;GARS1;CARS1;SARS1
REACTOME_RAB_REGULATION_OF_TRAFFICKING	35	54	3.3	0.000743092	1.2441e-05	RAB7A;RAB11A;RAB1A;RAB21;AKT3;RAB5C;RAB6B;RAB5B;RAB5A;TRAPPC6B;AKT1;GGA1;AKT2;RAB18;MAP1LC3B;TRAPPC2;TBC1D13;TBC1D20;RAB3A;RABEP1;RAB13;GGA3;RAB32;AKT1;RAB8B;RAB6A;RAB1B;TBC1D25;GABARAP;RAB4A;RAB11B;RAB14;RAB31;GABARAPL2;RAB33A;GDI1
KEGG_CHRONIC_MYELOID_LEUKEMIA	33	50	3.5	0.000743092	1.24463e-05	TGFB1;SHC4;TGFB3;AKT3;GRB2;MAPK3;IKBKG;CBL;TGFB1;PTPN11;AKT1;AKT2;PIK3CA;SMAD4;SMAD3;BCL2L1;MAPK1;AKT1;TGFB2;BAD;ABL1;PTPN11;RAF1;ARAF;NFKB1;STAT5A;BRAF;PIK3CG;SHC1;CRK;CRKL;MAP2K1;HDAC2;CTBP1;IKBKB;SHC1;MAP2K2
REACTOME_TNFR1_INDUCED_NFKAPPAB_SIGNALING_PATHWAY	18	22	8.1	0.000743092	1.24661e-05	USP4;IKBKG;TNFAIP3;TRADD;RNF31;RIPK1;CYLD;TRAF1;OTUD7B;SHARPIN;RPS27A;BIRC2;USP21;UBB;UBC;IKBKB;RACK1;TNFRSF1A
SIG_INSULIN_RECEPTOR_PATHWAY_IN_CARDIAC_MYOCYTES	24	33	4.8	0.000961132	1.63092e-05	AKT3;YWHAH;GRB2;MAPK3;GSK3A;PDPK1;RPS6KB1;CBL;CYTH3;YWHAZ;AKT1;YWHAG;AKT2;GSK3B;PIK3CA;RPS6KA3;GSK3B;MAPK1;AKT1;CDC42;YWHAG;RAF1;YWHAH;YWHAB;PTEN;SHC1;CAP1;YWHAB;SHC1;SFN
WP_AMYOTROPHIC_LATERAL_SCLEROSIS_ALS	19	24	6.9	0.000980497	1.70159e-05	SOD1;BCL2;DERL1;RAB5A;CASP3;MAP2K6;NEFL;GPX1;CAT;PPP3CA;RAC1;BCL2L1;BAD;APAF1;BID;MAPK14;CST3;MAP2K2;TNFRSF1A
BIOCARTA_BIOPEPTIDES_PATHWAY	19	24	6.9	0.000980497	1.70159e-05	KNG1;JAK2;PRKCA;PTK2B;PRKCB;MAPK8;GRB2;MAPK3;AGT;FYN;MAPK1;STAT3;STAT3;RAF1;F2;STAT5A;SHC1;KNG1;MAP2K1;MAPK14;SHC1;MAP2K2
KEGG_LONG_TERM_DEPRESSION	25	35	4.5	0.00101989	1.80929e-05	PLA2G5;PLA2G10;PLA2G2C;PRKCA;LYN;PRKCB;LYN;MAPK3;GNAI3;PLA2G12A;PLA2G2A;PLCB1;IGF1R;PPP2R1A;GNAI1;MAPK1;PLA2G4A;RAF1;ARAF;BRAF;MAP2K1;GNAQ;GRID2;MAP2K2;PLA2G12B;PLA2G1B
PID_TXA2PATHWAY	25	35	4.5	0.00101989	1.80929e-05	PRKCZ;PRKACA;PRKCA;RAB11A;DNM1;LYN;PRKCB;LYN;SLC9A3R1;SYK;SRC;AKT1;GRK2;SYK;FYN;SRC;RAC1;TGM2;AKT1;RHOA;ARHGEF1;PRKCQ;EGF;LCK;PIK3CG;MAPK14;VCAM1;GNAQ;FGR
KEGG_LEUKOCYTE_TRANSENDOTHELIAL_MIGRATION	40	65	2.9	0.00106701	1.91346e-05	ROCK2;VASP;PRKCA;PTK2B;MYL9;PRKCB;MYL12A;CTNNB1;MYL12B;RAC2;GNAI3;CDH5;PTPN11;F11R;ACTN1;VAV1;PIK3CA;PECAM1;ARHGAP5;PLCG2;CTNNA1;RAC1;GNAI1;RHOA;CTNNA1;MYL7;ACTN4;CDC42;PTPN11;ITGAL;PIK3CG;MMP9;CTNNB1;MMP2;MSN;ESAM;MAPK14;VCAM1;MYLPF;EZR;NCF1;MYL5;VCL
REACTOME_LATE_ENDOSOMAL_MICROAUTOPHAGY	16	19	9.6	0.00109223	1.97975e-05	VIM;HDAC6;CHMP2B;TSG101;CHMP2A;VPS28;RPS27A;CHMP6;HSPA8;UBB;UBC;MVB12B;CFTR;PARK7;RNASE1;CHMP4A
REACTOME_AUTOPHAGY	38	61	3	0.00112832	2.06693e-05	VIM;HDAC6;CHMP2B;SRC;TSG101;PRKAA2;UBE2N;ATG4C;MAP1LC3B;SRC;DYNC1LI2;VCP;CSNK2A1;GABARAPL1;LAMTOR3;CHMP2A;VPS28;GABARAP;HSF1;TOMM20;RPS27A;CSNK2A2;CHMP6;PIK3C3;HSPA8;UBB;GABARAPL2;UBC;DYNLL2;EEF1A1;UBE2N;DYNC1LI1;MVB12B;ATG5;MAP1LC3A;UBE2N;ATG4A;EEF1A1;CFTR;PARK7;RNASE1;UBE2N;CHMP4A
GOTZMANN_EPITHELIAL_TO_MESENCHYMAL_TRANSITION_DN	63	115	2.2	0.00113	2.09179e-05	SOD1;ANXA11;AHCY;YWHAH;SERPINE2;FGFBP1;SLC9A3R1;DDX19A;PENK;ARF4;CTNNB1;CASP3;HNRNPH1;GJA1;YWHAZ;PFN1;SCP2;STAC;RAB18;DOK1;ANXA7;PA2G4;TFAM;UFD1;SCP2;ITIH2;ACADM;ANXA7;HMGA2;CXCL2;GNAI1;AP2A2;TNNT2;LBP;ARHGDIB;HAX1;NTAN1;FNTA;FKBP2;CXCL2;YWHAH;DDOST;ATP5F1B;COPS5;PSMC5;TKT;IL1RN;HSD17B10;CXCL6;S100A13;GSTP1;LGALS9;CTNNB1;HMBS;GSS;FGFBP1;ECH1;SDF2;IL1R1;MAPK14;PURA;ALAD;STK3;POLR2C;BTC;CFTR;STIP1;…
THEILGAARD_NEUTROPHIL_AT_SKIN_WOUND_DN	67	124	2.1	0.00113092	2.1153e-05	CELF2;TGFB1;LST1;VIM;GALNT3;MAP2K4;ICAM3;ANXA11;STK24;ARPC1B;STAT6;PRKCB;MYCBP;RABIF;PPP1CC;ARPC3;KLC1;ME2;RASA1;MAPK3;WAS;CRADD;FLI1;TGFB1;AKT1;GRK2;CDKN2D;MEIS2;SPAST;ACTN1;GSK3B;MAPKAPK3;EIF4G2;PLCG2;MBD4;FLII;GSK3B;PPM1A;AKT1;LASP1;TWF2;APAF1;PPFIA1;ARHGDIB;ACTN4;RIPK1;ARHGEF1;IDS;TBCC;PRDX3;RAF1;HSF1;TBPL1;COPS5;TKT;TIAL1;CREBBP;LILRB5;PRKAR1A;TYK2;ARHGAP1;PRMT2;RBL2;ADGRE5;ENTPD1;HTATIP2;LS…
REACTOME_TBC_RABGAPS	20	26	6	0.0011437	2.16126e-05	RAB7A;RAB11A;RAB5C;RAB6B;RAB5B;RAB5A;GGA1;MAP1LC3B;TBC1D13;TBC1D20;RABEP1;GGA3;RAB8B;RAB6A;TBC1D25;GABARAP;RAB4A;RAB11B;GABARAPL2;RAB33A
WP_MICRORNAS_IN_CARDIOMYOCYTE_HYPERTROPHY	35	55	3.2	0.00116744	2.25114e-05	TGFB1;NPPA;MAP2K4;EDN1;ROCK2;PRKCB;MAPK8;MAPK3;CTNNB1;PDPK1;IKBKG;AGT;MAP2K6;TGFB1;AKT1;PLA2G2A;AKT2;GSK3B;PIK3CA;IGF1R;PPP3CA;GSK3B;RAC1;MAPK1;AKT1;STAT3;RHOA;STAT3;MAP2K5;RAF1;NFKB1;CAMK2D;EGF;PIK3CG;CTNNB1;MAP2K1;MAPK14;IKBKB;MAP2K2;MAP2K3
WP_LEPTIN_SIGNALING_PATHWAY	35	55	3.2	0.00116744	2.25114e-05	JAK2;ROCK2;EIF4E;MAPK8;GRB2;MAPK3;GSK3A;IKBKG;SRC;RPS6KB1;ERBB2;PTPN11;AKT1;GSK3B;PRKAA2;FYN;PLCG2;SRC;GSK3B;RAC1;BCL2L1;MAPK1;AKT1;STAT3;RHOA;BAD;STAT3;CDC42;PTPN11;RAF1;NFKB1;IL1RN;PTEN;SHC1;IL1B;MAP2K1;MAPK14;IKBKB;SHC1;MAP2K2;LEP
WP_B_CELL_RECEPTOR_SIGNALING_PATHWAY	45	76	2.6	0.00123835	2.41175e-05	BLNK;DAPP1;LYN;BTK;PRKCB;LYN;MAPK8;GRB2;GSK3A;CR2;SYK;RAC2;CD22;PDPK1;IKBKG;CBL;MAP2K6;PTPN11;TEC;AKT1;MAPK9;PTPN6;SYK;GSK3B;VAV1;FYN;PLCG2;BTK;GSK3B;RAC1;MAPK1;AKT1;CDC42;PTPN11;RAF1;NFKB1;LCK;MAX;BRAF;PIK3CG;SHC1;CRK;CRKL;MAP2K1;MAPK9;MAPK14;IKBKB;GAB1;BCL6;SHC1;CD81;MAP2K2;HCLS1
REACTOME_RHO_GTPASES_ACTIVATE_PKNS	21	28	5.4	0.00131014	2.60209e-05	H2BU1;H2BC21;H2BC12;H2BC21;H2AZ1;RHOC;MYL9;YWHAH;MYL12B;PDPK1;YWHAZ;KDM4C;YWHAG;H3C1;PPP1R14A;RAC1;RHOA;YWHAG;YWHAH;MYL6;YWHAB;KLK3;YWHAB;SFN;KLK3;PKN2
PID_RAC1_PATHWAY	21	28	5.4	0.00131014	2.60209e-05	ARHGDIA;MAP2K4;ARPC1B;MAPK8;ARPC3;CTNNB1;MAP2K6;MAPK9;ARPC2;MAP3K11;ARHGAP5;CTNNA1;RAC1;ARPC5;STAT3;CTNNA1;STAT3;STAT5A;CRK;CTNNB1;MAPK9;MAPK14;NCF1;MAP2K3;RACGAP1
REACTOME_CELLULAR_SENESCENCE	43	72	2.7	0.00135379	2.71488e-05	H2BU1;H2BC21;H2BC12;H2BC21;H2AZ1;CCNA1;MAP2K4;ANAPC7;ANAPC10;CDK2;KAT5;MAPK8;IFNB1;MAPK3;RBBP4;CCNE1;UBE2D1;MAP2K6;H1-2;MAPK9;CDKN2D;H3C1;MAPKAPK2;MAPKAPK3;LMNB1;RPS6KA3;CCNA2;HMGA2;MAPK1;STAT3;SCMH1;STAT3;EED;NFKB1;RPS27A;MAPK10;AGO1;UBB;UBC;UBE2C;MAPK9;MAPK14;UBE2S;IL6;MAP2K3;MAPKAPK5
BIOCARTA_PYK2_PATHWAY	17	21	7.7	0.00137843	2.88233e-05	MAP2K4;PRKCA;PTK2B;PRKCB;MAPK8;GRB2;MAPK3;RAC1;MAPK1;RAF1;SHC1;CRKL;MAP2K1;MAPK14;SHC1;GNAQ;MAP2K2;MAP2K3
BIOCARTA_EIF4_PATHWAY	17	21	7.7	0.00137843	2.88233e-05	PRKCA;PRKCB;EIF4E;MAPK3;PDPK1;EIF4A1;RPS6KB1;AKT1;PIK3CA;EIF4A2;EIF4G2;EIF4A2;GHR;MKNK1;MAPK1;AKT1;PTEN;EIF4G1;MAPK14
WIERENGA_PML_INTERACTOME	14	16	12.6	0.00137843	2.92379e-05	AHSG;PRKCB;ARF4;ZYX;ALB;KPNB1;CTPS1;KARS1;OAT;HNRNPF;EEF1G;EEF1A1;HSPA5;EEF1A1;RPN1
BIOCARTA_CERAMIDE_PATHWAY	14	16	12.6	0.00137843	2.92379e-05	MAP2K4;MAPK8;MAPK3;BCL2;TRADD;MAPK1;BAD;RIPK1;RAF1;NFKB1;SMPD1;AIFM1;MAP2K1;TNFRSF1A
PID_S1P_S1P3_PATHWAY	14	16	12.6	0.00137843	2.92379e-05	JAK2;ITGAV;AKT3;MAPK3;GNAI3;SRC;AKT1;FLT1;SRC;RAC1;GNAI1;ITGAV;MAPK1;AKT1;RHOA;ITGAV;VEGFA;VEGFA;ITGAV;VEGFA;GNAQ
WP_TNFALPHA_SIGNALING_PATHWAY	38	62	2.9	0.00162581	3.51121e-05	PRKCZ;MAP2K4;TBK1;MAPK8;GLUL;GRB2;MAPK3;IKBKG;TANK;CASP3;MAP2K6;AKT1;MAPK9;TNFAIP3;TRADD;RAC1;BCL2L1;MAPK1;AKT1;BAD;CSNK2A1;APAF1;RIPK1;TRAF1;RAF1;OTUD7B;DIABLO;NFKB1;CREBBP;BIRC2;CDC37;MAPK9;TNFRSF1B;BID;RFFL;TNFRSF1B;IKBKB;IL6;MAP2K3;CFLAR;TNFRSF1A
WIERENGA_STAT5A_TARGETS_DN	51	90	2.4	0.00173374	3.78712e-05	LST1;MRPS14;CTSG;FERMT3;ROCK2;ILK;PRTFDC1;PPIF;PDLIM1;UBASH3B;LGALSL;TCEAL1;RGS18;CTDSPL;PLEK;PDIA5;ZYX;PPIF;RBPMS2;MPL;TPM4;ACTN1;GPX1;SH3BGRL2;TPM4;PECAM1;PLCG2;IFI16;C5;TTC27;VWF;STX1A;PLXDC2;STX1A;PPM1F;GP6;TPM2;HEXIM2;TREML1;DLK1;DLK1;IFI16;MANSC1;SELP;ITGB1BP2;TREML1;CD93;CD93;FCER1A;IL17RA;GP1BB;SCPEP1;PLEKHO2;EFNB2;WFDC1;ITGB7;HGD;LOXL3
PID_THROMBIN_PAR1_PATHWAY	18	23	6.5	0.00173374	3.81115e-05	ARHGDIA;ROCK2;VASP;PRKCA;DNM1;PRKCB;GNAI3;ZYX;DNM2;PLCB1;PIK3CA;ARRB1;GNAI1;SNX1;RHOA;ARHGEF1;F2;GNAQ
DESERT_STEM_CELL_HEPATOCELLULAR_CARCINOMA_SUBCLASS_UP	64	119	2.1	0.00174979	3.89586e-05	PRC1;NAP1L1;MMP12;PLEKHF2;DAB2;SERPINE2;PPP1CC;ITGA5;MAPRE1;VIL1;TPD52L2;XPNPEP1;ME2;HGF;BZW2;SPHK1;YWHAZ;CLIC1;HOMER1;POSTN;ARPC2;UBE2I;MAPRE1;HMGA2;POSTN;LMNB2;ENO1;NCL;PRMT1;PLBD1;PKM;MEP1A;ENPP2;TKT;IGSF3;TOMM20;SERPINH1;ROBO1;RAP1GAP;GPX7;TPM2;S100A6;MMP9;GNPDA1;ETV5;GPD1L;CAPG;TIMP2;TNFRSF21;UBE2C;G6PD;ADAM9;SPP1;HDAC2;KIF23;ASRGL1;ATIC;HK2;VNN2;COCH;PRSS3;ANXA5;RACGAP1;ALDOA;MTHFD2;AGO2
DITTMER_PTHLH_TARGETS_UP	35	56	3	0.00174979	3.9511e-05	BSG;H2AZ1;B4GALT3;ANXA11;NUCB1;JAG1;ECM1;RBM39;ARF4;KLC1;CTNNB1;GNAI3;RAB22A;KLF9;ANXA7;ANXA7;CPD;RAB13;NPTN;GRHPR;GRB10;HAX1;RAB6A;RAB4A;ATP5PF;CTNNB1;TPI1;UBE2C;COL6A1;AREG;PDGFC;ATP5IF1;CDCP1;CYCS;UROD;ANXA5;TIMP3
KEGG_VEGF_SIGNALING_PATHWAY	35	56	3	0.00174979	3.9511e-05	PLA2G5;PLA2G10;PLA2G2C;PRKCA;AKT3;PRKCB;MAPK3;RAC2;SRC;SPHK1;PLA2G12A;PTGS2;AKT1;PLA2G2A;AKT2;HSPB1;MAPKAPK2;MAPKAPK3;PIK3CA;PPP3CA;PLCG2;SRC;RAC1;MAPK1;AKT1;BAD;CDC42;VEGFA;PLA2G4A;RAF1;VEGFA;PIK3CG;MAP2K1;MAPK14;VEGFA;RAC3;MAP2K2;PLA2G12B;PLA2G1B
REACTOME_OXIDATIVE_STRESS_INDUCED_SENESCENCE	26	38	3.9	0.00175902	4.10416e-05	H2BU1;H2BC21;H2BC12;H2BC21;H2AZ1;MAP2K4;MAPK8;IFNB1;MAPK3;RBBP4;MAP2K6;MAPK9;CDKN2D;H3C1;MAPKAPK2;MAPKAPK3;MAPK1;SCMH1;EED;RPS27A;MAPK10;AGO1;UBB;UBC;MAPK9;MAPK14;MAP2K3;MAPKAPK5
REACTOME_HCMV_INFECTION	26	38	3.9	0.00175902	4.10416e-05	H2BU1;H2AC1;H2BC21;H2AW;H2BC12;H2BC21;H2AC11;CHMP1A;CHMP2B;SNF8;RBBP4;TSG101;H3C1;DYNC1LI2;HNRNPK;VPS4A;CHMP2A;EED;PML;VPS28;VPS25;NFKB1;CHMP6;DYNLL2;DYNC1LI1;MVB12B;CHMP4A
WP_NRP1TRIGGERED_SIGNALING_PATHWAYS_IN_PANCREATIC_CANCER	28	42	3.6	0.00182462	4.32759e-05	TGFB1;PLXNA4;TGFB3;AKT3;CDK2;MAPK3;GSK3A;HGF;SRC;CDH5;CCNE1;PLXNA1;TGFB1;AKT1;AKT2;SMAD2;SMAD4;FLT1;SMAD3;SRC;RAC1;MAPK1;AKT1;TGFB2;VEGFA;VEGFA;NFKB1;EGF;MMP9;MMP2;MAP2K1;VEGFA;MAP2K2
WP_HEPATITIS_B_INFECTION	58	106	2.2	0.00190959	4.61378e-05	TGFB1;JAK2;MAP2K4;TGFB3;PRKCA;PTK2B;STAT6;AKT3;PRKCB;TBK1;MAPK8;IFNB1;GRB2;MAPK3;BCL2;IKBKG;SRC;CASP3;MAP2K6;TGFB1;YWHAZ;AKT1;IFNA4;MAPK9;IRF3;AKT2;PIK3CA;SMAD2;SMAD4;SMAD3;SRC;MAPK1;AKT1;STAT3;IFNAR1;TGFB2;BAD;APAF1;TIRAP;STAT3;RAF1;ARAF;IRAK4;NFKB1;CREBBP;YWHAB;MAPK10;STAT5A;BRAF;MMP9;DDX58;TYK2;IFNA7;MAP2K1;MAPK9;YWHAB;BID;MAPK14;IKBKB;IL6;MAP2K2;MAP2K3;CYCS;TLR4
REACTOME_RECYCLING_PATHWAY_OF_L1	15	18	9	0.00190959	4.70707e-05	DNM1;L1CAM;SRC;SH3GL2;DNM2;NUMB;RPS6KA3;SRC;SH3GL2;MAPK1;AP2A2;RPS6KA6;MSN;EZR;AP2B1;DPYSL2;RDX
REACTOME_GPVI_MEDIATED_ACTIVATION_CASCADE	19	25	5.7	0.00190959	4.70803e-05	PRKCZ;LYN;LYN;MPIG6B;SYK;RAC2;PDPK1;PTPN11;PTPN6;SYK;VAV1;FYN;CLEC1B;PIK3CA;PLCG2;RAC1;RHOA;CDC42;PTPN11;LCK;PIK3CG;GP6
CHAUHAN_RESPONSE_TO_METHOXYESTRADIOL_DN	41	69	2.7	0.00197383	4.90984e-05	VIM;H2AZ1;ENO2;PDLIM1;NUCB1;NAP1L1;AP1S2;ENO2;PGK1;HADH;ARL6IP1;PTPN6;TNFAIP3;EIF3M;ATP5PO;LGALS1;NME4;MCL1;UBA1;UBE2I;ARPC5;EIF4B;ARHGDIB;HLA-G;RAF1;DDOST;PKM;YWHAB;TPP1;ERP29;IL2RG;UBC;PCBP2;EEF1A1;YWHAB;CTBP1;FOXO3;UBE2S;LSP1;EEF1A1;MCL1;B2M;HCLS1;FDPS;ATP6V1F
WELCSH_BRCA1_TARGETS_UP	57	104	2.2	0.00200449	5.02476e-05	ADCYAP1;GALNT3;MAP2K4;RAB7A;LUM;ID2;RAB1A;RHOC;RRAS;KAT5;TCEAL1;MYL12A;RAB5B;CIRBP;TSG101;RBM3;NID1;WWP1;CAT;MAP4K5;ANXA7;ANXA4;RPS6KA3;ANXA7;GNAI1;RAB2A;CCT7;EIF4B;UBE2D3;TMPO;RAB6A;RAB2A;DDOST;RAB4A;HMGCL;ENPP2;TXNDC9;HEXB;QPCT;PGRMC1;ALDH7A1;PRKAR1A;PLD3;PTGR1;HAGH;MAP2K1;ECH1;PCBD1;MFGE8;HSPA5;IDH1;ANXA2;B2M;FCGRT;RDX;ITGA1;ANXA5;PTGR1;GSTZ1;TMED10
WP_INTERLEUKIN1_IL1_STRUCTURAL_PATHWAY	21	29	4.7	0.00242033	6.25383e-05	MAP2K4;TOLLIP;EIF4E;MAPK8;MAPK3;TANK;MAP2K6;MAPK9;MAPKAPK2;MKNK1;MAPK1;IRAK4;NFKB1;MAPK10;IL1RAP;MAP2K1;MAPK9;IL1RAP;IL1R1;MAPK14;IKBKB;MAP2K2;MAP2K3
REACTOME_INFECTION_WITH_MYCOBACTERIUM_TUBERCULOSIS	16	20	7.2	0.00253443	6.59753e-05	CTSG;RAB7A;HGS;PGK1;MAPK3;GSK3A;RAB5A;KPNB1;DUSP16;MAPK1;ENO1;RPS27A;KPNA1;UBB;UBC;B2M
SMITH_TERT_TARGETS_DN	35	57	2.9	0.00255133	6.73991e-05	TNFSF10;CHMP1A;SAA1;RAB11A;AHCY;L1CAM;NID2;SERPING1;NEFL;AKT1;CAT;NME4;ABR;ARHGAP25;UGP2;ANXA4;TRADD;NSDHL;AKT1;SAA1;ARHGDIB;GSN;PML;GSN;DUSP6;IL1RN;A2M;OAT;ALDH7A1;MMP2;VSNL1;PNP;GRK5;PNP;IDI1;ADIPOQ;TCF4;CPOX;CDSN
WP_PROLACTIN_SIGNALING_PATHWAY	35	57	2.9	0.00255133	6.73991e-05	JAK2;FLNA;MAPK8;GRB2;MAPK3;SRC;RPS6KB1;ERBB2;CBL;CASP3;PTPN11;YWHAZ;TEC;AKT1;MAPK9;PTPN6;YWHAG;GSK3B;VAV1;FYN;PIK3CA;SRC;GSK3B;RAC1;MAPK1;AKT1;STAT3;STAT3;YWHAG;PPIA;PTPN11;RAF1;NFKB1;FLNA;STAT5A;PIK3CG;SHC1;MAP2K1;MAPK9;MAPK14;AGAP2;SHC1;MAP2K2;PPIB
MCBRYAN_PUBERTAL_TGFB1_TARGETS_UP	61	114	2.1	0.0026877	7.15623e-05	GALNT3;ITGAV;CRIM1;AK2;CALD1;PTK2B;JAG1;RAB5C;ECM1;MAPK8;BPGM;IER3;GFRA1;UBE2D1;GJA1;CLIC1;AKT1;DNM2;RPS6KA3;CPD;TGM2;DUSP16;EHD1;ITGAV;AKT1;TPSAB1;LASP1;LIPG;CSNK2A1;GRB10;ACADVL;GSN;ITGAV;LPL;CCN1;GSN;VEGFA;VEGFA;ITGAV;F3;PLAT;TPP2;CRK;TPM2;S100A6;CNN1;TNC;CAP1;OGFR;MMP2;DPYSL3;CAPG;TIMP2;HES1;FMR1;PCOLCE;MAPK14;MFGE8;PDGFC;FN1;APLP2;GUSB;VEGFA;HTRA1;FABP3;BASP1;TNC;ACAT1;TNC;PLOD2;TNC
KEGG_ERBB_SIGNALING_PATHWAY	42	72	2.5	0.0026877	7.28727e-05	SHC4;MAP2K4;PRKCA;AKT3;PRKCB;MAPK8;GRB2;MAPK3;SRC;NCK2;RPS6KB1;ERBB2;CBL;AKT1;MAPK9;AKT2;GSK3B;ABL2;PIK3CA;PLCG2;SRC;GSK3B;PAK4;MAPK1;AKT1;BAD;ABL1;RAF1;ARAF;CAMK2D;EGF;CAMK2B;MAPK10;STAT5A;BRAF;PIK3CG;SHC1;CRK;CRKL;MAP2K1;MAPK9;AREG;GAB1;SHC1;BTC;MAP2K2;NRG3
ZHU_CMV_24_HR_UP	33	53	3	0.0026877	7.30749e-05	ISG15;ISG15;PSMA2;MX1;ENO2;PIM1;OAS1;ENO2;SCARB2;SRSF7;EIF4E;NUBP1;HSPA1A;EIF4A1;POLR2K;HSPA1A;ATP6V1C1;PDP1;GBP1;PSMD6;FGFR1;SNRPA1;SAR1A;HSPA1A;ENO1;IL7R;RANBP1;PLA2G4A;HSPA1A;HSPA1A;MANF;HSPA1B;NFKB1;HSPA1A;HSPE1;HSPA1A;GCH1;HSPA1A;SAR1A;PNP;PNP;SNRPB2;UBE2S;STIP1;EIF5
BIOCARTA_MAPK_PATHWAY	33	53	3	0.0026877	7.30749e-05	TGFB1;MAP2K4;TGFB3;MAPK8;GRB2;MAPK3;RPS6KB1;MAP2K6;TGFB1;MAPK9;MAPKAPK2;MAPKAPK3;CEBPA;MAP4K5;MAP3K11;RPS6KA3;TRADD;RAC1;MKNK1;MAPK1;TGFB2;RIPK1;MAP2K5;RAF1;NFKB1;MAX;MAPK10;SHC1;MAP2K1;MAPK9;MAPK14;IKBKB;SHC1;MAP2K2;MAP2K3;MAPKAPK5
PID_CERAMIDE_PATHWAY	24	35	3.9	0.0028197	7.72073e-05	PRKCZ;MAP2K4;MAPK8;MAPK3;BCL2;CRADD;AKT1;TRADD;MAPK1;AKT1;BAD;PAWR;RIPK1;RAF1;BAG4;NFKB1;EGF;SMPD1;AIFM1;MAP2K1;BID;MAP2K2;CYCS;PRKRA;TNFRSF1A
KEGG_ACUTE_MYELOID_LEUKEMIA	26	39	3.6	0.00290896	8.1377e-05	CCNA1;KIT;AKT3;PIM1;GRB2;MAPK3;IKBKG;RPS6KB1;AKT1;AKT2;PIK3CA;CEBPA;MAPK1;AKT1;STAT3;BAD;SPI1;STAT3;PML;RAF1;ARAF;NFKB1;STAT5A;BRAF;PIK3CG;MAP2K1;IKBKB;MAP2K2
WP_IL3_SIGNALING_PATHWAY	28	43	3.4	0.00290896	8.191e-05	TGFB1;JAK2;PRKACA;LYN;LYN;MAPK8;GRB2;MAPK3;BCL2;SYK;SRC;CBL;TGFB1;PTPN11;AKT1;PTPN6;SYK;VAV1;FYN;SRC;BCL2L1;MAPK1;AKT1;STAT3;BAD;STAT3;PTPN11;RAF1;YWHAB;STAT5A;SHC1;CRKL;IL3RA;MAP2K1;CD69;YWHAB;SHC1
WP_THYROID_STIMULATING_HORMONE_TSH_SIGNALING_PATHWAY	27	41	3.5	0.00290896	8.20416e-05	JAK2;PAX8;CDK2;MAPK3;MYL12B;PDPK1;GNAI3;SRC;RPS6KB1;CCNE1;MAP2K6;AKT1;PLCB1;PIK3CA;IGF1R;SRC;GNAI1;MAPK1;AKT1;STAT3;CGA;STAT3;RAF1;RAP1GAP;BRAF;MAP2K1;MAPK14;RBL2;CGA;GNAQ;MAP2K3;CGA
PID_IL8_CXCR2_PATHWAY	17	22	6.1	0.00295875	8.44378e-05	RAB7A;VASP;PRKCA;RAB11A;DNM1;LYN;PRKCB;LYN;RAC2;RAB5A;PDPK1;CBL;AKT1;PLCB1;ARRB1;PPP2R1A;AKT1;PIK3CG;FGR
REACTOME_ASSEMBLY_OF_THE_HIV_VIRION	9	9	Inf	0.00321132	9.47419e-05	TSG101;FURIN;VPS28;PPIA;RPS27A;UBB;UBC;NMT2;MVB12B
REACTOME_UPTAKE_AND_FUNCTION_OF_ANTHRAX_TOXINS	9	9	Inf	0.00321132	9.47419e-05	MAP2K4;ANTXR1;ANTXR2;MAP2K6;FURIN;PDCD6IP;MAP2K1;MAP2K2;MAP2K3
PID_SMAD2_3PATHWAY	11	12	19.8	0.0032797	9.73919e-05	CTDSP1;CTDSPL;MAPK3;KPNB1;SMAD2;SMAD4;SMAD3;UBE2I;PPM1A;MAPK1;PIAS4
REACTOME_APOPTOSIS	61	115	2.1	0.00332817	9.98863e-05	PSMA2;TNFSF10;VIM;DBNL;DCC;STK24;AKT3;YWHAH;PSMA1;MAPK8;MAPK3;BCL2;CTNNB1;CASP3;H1-2;YWHAZ;AKT1;YWHAG;AKT2;TNFRSF10B;PSMB4;KPNB1;LMNB1;PSMD6;NMT1;TRADD;PSMD11;BCL2L1;MAPK1;AKT1;STAT3;BAD;APAF1;STAT3;RIPK1;GSN;GSN;FNTA;YWHAG;DAPK1;PRKCQ;YWHAH;PSMC5;DIABLO;RPS27A;KPNA1;YWHAB;BIRC2;GZMB;CTNNB1;UBB;DAPK3;UBC;TNFRSF10A;PSMB1;DYNLL2;PSMC3;YWHAB;BID;DBNL;UNC5B;PSME2;NMT1;UNC5B;PSMB9;DSG3;CFLAR;CYCS;SFN;…
REACTOME_TRANSLOCATION_OF_SLC2A4_GLUT4_TO_THE_PLASMA_MEMBRANE	18	24	5.4	0.00332817	0.000101398	RAB11A;YWHAH;YWHAZ;AKT1;YWHAG;AKT2;PRKAA2;RAB13;STX4;RAC1;AKT1;ASPSCR1;YWHAG;RHOQ;YWHAH;RAB4A;YWHAB;RAB14;RALA;YWHAB;KIF3A;SFN
REACTOME_TRNA_AMINOACYLATION	18	24	5.4	0.00332817	0.000101398	WARS1;WARS2;HARS1;DARS1;NARS1;YARS1;MARS1;AARS1;DARS2;TARS1;EEF1E1;AIMP1;VARS1;KARS1;SARS2;GARS1;CARS1;SARS1
WP_GASTRIN_SIGNALING_PATHWAY	47	84	2.3	0.00376655	0.000115491	JAK2;PRKACA;PRKCA;KIT;JAG1;KAT5;MAPK8;GRB2;BMP2;MAPK3;CTNNB1;SRC;RPS6KB1;CASP3;PTPN11;PTGS2;AKT1;MAPK9;GSK3B;FYN;PIK3CA;MAP3K11;ARRB1;SRC;GSK3B;RAC1;BCL2L1;MAPK1;AKT1;STAT3;RHOA;BAD;STAT3;LAMTOR3;CDC42;VEGFA;PTPN11;RAF1;PRKCQ;VEGFA;NFKB1;BIRC2;SHC1;CRK;CTNNB1;MAP2K1;MAPK9;MAPK14;MMP7;FOXO3;IKBKB;VEGFA;ANXA2;SHC1;GNAQ;TCF4;SERPINE1
REACTOME_REGULATION_OF_TNFR1_SIGNALING	19	26	4.9	0.00376655	0.000116207	USP4;IKBKG;TNFAIP3;TRADD;RNF31;RIPK1;CYLD;TRAF1;OTUD7B;SHARPIN;RPS27A;BIRC2;USP21;UBB;UBC;IKBKB;CFLAR;RACK1;TNFRSF1A
HINATA_NFKB_TARGETS_KERATINOCYTE_UP	40	69	2.5	0.00411563	0.000130151	VIM;SOD1;ARHGDIA;SAA1;CXCL10;BMP2;CXCL3;MAPK9;TNFAIP3;GBP1;RAC1;ESM1;SAA1;GABARAPL1;ARHGDIB;IL7R;VEGFA;TRAF1;PTX3;VEGFA;NFKB1;IL1RN;CXCL6;CCL5;BIRC2;STAT5A;PLAT;TNFAIP8;CXCL3;MMP9;CXCL11;TNC;RARRES1;IL1B;IL15;CDH3;MAPK9;WFDC2;FN1;VEGFA;TNC;TNC;IL6;MAP2K3;CFLAR;TNC;CCL5;SERPINE1;EFNA1
REACTOME_SIGNALING_BY_NTRKS	45	80	2.3	0.00426133	0.00013558	ATF1;ADCYAP1;NTRK2;ID2;DNM1;GRB2;MAPK3;SRC;PTPN11;SH3GL2;FURIN;DNM2;MAPKAPK2;MAPKAPK3;FYN;PIK3CA;SH3GL3;DUSP3;BDNF;RPS6KA3;SRC;RAC1;PPP2R1A;SH3GL2;RALB;MAPK1;AP2A2;STAT3;RHOA;STAT3;ARC;MAP2K5;PTPN11;NTF4;DUSP6;F3;YWHAB;BRAF;SHC1;CRK;CRKL;RALA;MAP2K1;YWHAB;MAPK14;NAB1;GAB1;AP2B1;SHC1;MAP2K2;TCF12;BDNF
WP_INTERFERON_TYPE_I_SIGNALING_PATHWAYS	22	32	4	0.00452046	0.000145568	EIF4E;EIF4A1;RPS6KB1;CBL;MAP2K6;PTPN11;PTPN6;VAV1;FYN;RAC1;STAT3;IFNAR1;EIF4B;STAT3;PTPN11;PRMT1;LCK;STAT5A;CRK;CRKL;TYK2;MAPK14;MAP2K3;RACK1
SIG_IL4RECEPTOR_IN_B_LYPHOCYTES	15	19	6.8	0.00458286	0.000149345	STAT6;AKT3;GRB2;MAPK3;GSK3A;BCL2;PDPK1;AKT1;AKT2;GSK3B;PIK3CA;GSK3B;MAPK1;AKT1;BAD;RAF1;SHC1;SHC1
REACTOME_SIGNALING_BY_SCF_KIT	24	36	3.6	0.00462358	0.000153347	JAK2;PRKCA;FER;KIT;LYN;LYN;GRB2;CMA1;SRC;CBL;PTPN11;TEC;PTPN6;VAV1;FYN;PIK3CA;SRC;RAC1;STAT3;GRB10;STAT3;PTPN11;KITLG;GRAP;LCK;STAT5A;MMP9;PTPRU
WP_IL6_SIGNALING_PATHWAY	24	36	3.6	0.00462358	0.000153347	JAK2;MAP2K4;GRB2;MAPK3;RPS6KB1;AGT;PTPN11;AKT1;GSK3B;VAV1;GSK3B;RAC1;BCL2L1;MAPK1;AKT1;STAT3;TIMP1;BAD;STAT3;PTPN11;TIMP1;CREBBP;CRP;SHC1;TYK2;MAP2K1;GAB1;SHC1;IL6;MAP2K2
WP_IL4_SIGNALING_PATHWAY	24	36	3.6	0.00462358	0.000153347	JAK2;STAT6;FLNA;DOK2;IL4;GRB2;MAPK3;DOK2;RPS6KB1;CBL;PTPN11;AKT1;PTPN6;PIK3CA;CEBPA;MAPK1;AKT1;STAT3;BAD;STAT3;PTPN11;NFKB1;FLNA;STAT5A;SHC1;IL2RG;TYK2;MAPK14;IKBKB;SHC1
WP_ERBB_SIGNALING_PATHWAY	43	76	2.4	0.00468487	0.000158725	SHC4;MAP2K4;PRKCA;AKT3;PRKCB;MAPK8;GRB2;MAPK3;PDPK1;SRC;NCK2;RPS6KB1;ERBB2;CBL;AKT1;MAPK9;AKT2;GSK3B;ABL2;PIK3CA;PLCG2;SRC;GSK3B;PAK4;PAK6;MAPK1;AKT1;BAD;ABL1;RAF1;ARAF;CAMK2D;EGF;CAMK2B;MAPK10;STAT5A;BRAF;SHC1;CRK;CRKL;MAP2K1;MAPK9;AREG;GAB1;SHC1;BTC;MAP2K2;NRG3
KEGG_INSULIN_SIGNALING_PATHWAY	43	76	2.4	0.00468487	0.000158725	PRKCZ;SHC4;PRKACA;PYGB;PRKAR2B;AKT3;PPP1CC;EIF4E;MAPK8;GRB2;INSR;MAPK3;PDPK1;TRIP10;RPS6KB1;CBL;AKT1;MAPK9;AKT2;GSK3B;PRKAA2;PIK3CA;GSK3B;MKNK1;MAPK1;AKT1;BAD;PKLR;RAF1;ARAF;RHOQ;MAPK10;BRAF;PIK3CG;SHC1;CRK;PRKAR1A;CRKL;MAP2K1;FASN;MAPK9;PKLR;IKBKB;SHC1;PRKCI;MAP2K2;HK2;FBP1
FERNANDEZ_BOUND_BY_MYC	52	96	2.1	0.00468487	0.000158993	BSG;TGFB1;AHSG;MPO;CTSF;TGFB3;ID2;STAT6;EIF4E;ARF4;INSR;BCL2;CR2;ACOX1;EIF4A1;TGFB1;RBM3;IRF3;GSK3B;CEBPA;PRTN3;TOP1;MCL1;ACADM;ACHE;PRTN3;HNRNPDL;GSK3B;CXCL2;RABGAP1L;TGFB2;FOXM1;ENO1;HSPD1;PLA2G4A;CXCL2;HMOX1;IL11RA;HNRNPA2B1;HSPE1;MUC1;PPID;GSTP1;PTEN;ARF1;HSPA8;TPM2;HMBS;PSMB1;EIF5A2;MSN;PAICS;NME1;MCL1;TCF12;SERPINE1;UROD
WP_EBOLA_VIRUS_INFECTION_IN_HOST	42	74	2.4	0.0049977	0.000171537	CLEC4G;RAB7A;ITGAV;ICAM3;RHOC;ICAM2;TBK1;FLNA;ITGA5;IL4;MAPK3;RAB5A;TSG101;AKT1;IRF3;ACTN1;EIF2S1;PIK3CA;IGF1R;TOP1;CD209;RAC1;VPS4A;ITGAV;MAPK1;AKT1;RHOA;HLA-G;ACTN4;GSN;ITGAV;CDC42;GSN;ITGAV;NFKB1;CREBBP;FLNA;KPNA1;CD209;HAVCR2;DDX58;CTSB;MERTK;CD209;MERTK;ASGR1;MFGE8;PRKRA;ITGA1;TLR4;MBL2
REACTOME_MYD88_INDEPENDENT_TLR4_CASCADE	35	59	2.6	0.00519457	0.000181299	ATF1;MAP2K4;SAA1;TBK1;MAPK8;MAPK3;IKBKG;TANK;UBE2D1;MAP2K6;PTPN11;MAPK9;IRF3;MAPKAPK2;MAPKAPK3;UBE2N;DUSP3;RPS6KA3;PPP2R1A;MAPK1;UBE2D3;SAA1;RIPK1;S100A12;PTPN11;DUSP6;NFKB1;RPS27A;MAPK10;BIRC2;UBB;UBC;MAP2K1;MAPK9;UBE2N;MAPK14;IKBKB;UBE2N;MAP2K3;UBE2N;TLR4
KEGG_APOPTOSIS	35	59	2.6	0.00519457	0.000181299	TNFSF10;PRKACA;PRKAR2B;AKT3;BCL2;IKBKG;CASP3;AKT1;AKT2;TNFRSF10B;PIK3CA;PPP3CA;TRADD;BCL2L1;AKT1;BAD;APAF1;RIPK1;CAPN2;IRAK4;NFKB1;BIRC2;CAPN1;PIK3CG;AIFM1;PRKAR1A;IL1B;TNFRSF10A;IL3RA;IL1RAP;BID;IL1RAP;IL1R1;IKBKB;CFLAR;CYCS;TNFRSF1A
KEGG_AMINOACYL_TRNA_BIOSYNTHESIS	16	21	5.8	0.00521029	0.000184862	WARS1;WARS2;HARS1;DARS1;NARS1;YARS1;MARS1;AARS1;DARS2;TARS1;VARS1;KARS1;SARS2;GARS1;CARS1;SARS1
REACTOME_RAF_ACTIVATION	16	21	5.8	0.00521029	0.000184862	JAK2;PPP1CC;PPP2R5A;SRC;MAP3K11;SRC;PPP2R1A;RAF1;ARAF;CAMK2D;CAMK2B;YWHAB;MARK3;MRAS;BRAF;MAP2K1;YWHAB;MAP2K2
WP_EPO_RECEPTOR_SIGNALING	16	21	5.8	0.00521029	0.000184862	JAK2;GRB2;RASA1;MAPK3;SRC;AKT1;SRC;MAPK1;AKT1;STAT3;STAT3;RAF1;STAT5A;PIK3CG;SHC1;PDK1;MAP2K1;SHC1;MAP2K2;PTPRU
WP_ANGIOPOIETINLIKE_PROTEIN_8_REGULATORY_PATHWAY	40	70	2.4	0.00545366	0.000199806	MAP2K4;EIF4E;MAPK8;INSR;MAPK3;GSK3A;PDPK1;TRIP10;RPS6KB1;CBL;MAP2K6;AKT1;MAPK9;AKT2;GSK3B;PRKAA2;PIK3CA;MAP4K5;MAP3K11;RPS6KA3;GSK3B;MAPK1;AKT1;RPS6KA6;LPL;MAP2K5;RAF1;RHOQ;MAPK10;PIK3CG;SHC1;PIK3C3;CRK;CAP1;THRB;MAP2K1;FASN;MAPK9;MAPK14;FOXO3;SHC1;MAP2K2;MAP2K3;FBP1
WP_EGFR_TYROSINE_KINASE_INHIBITOR_RESISTANCE	40	70	2.4	0.00545366	0.000199806	SHC4;JAK2;FGFR3;PRKCA;AKT3;PRKCB;RRAS;EIF4E;GRB2;MAPK3;BCL2;HGF;PDPK1;SRC;RPS6KB1;ERBB2;AKT1;AKT2;GSK3B;PIK3CA;IGF1R;PLCG2;SRC;GSK3B;BCL2L1;MAPK1;AKT1;STAT3;BAD;STAT3;VEGFA;RAF1;ARAF;VEGFA;EGF;PTEN;MRAS;BRAF;SHC1;MAP2K1;FOXO3;PDGFC;VEGFA;GAB1;SHC1;IL6;MAP2K2
REACTOME_L1CAM_INTERACTIONS	33	55	2.7	0.00551408	0.000204146	ITGA2B;ITGAV;ITGA2B;DNM1;CNTN1;L1CAM;ITGA5;MAPK3;GAP43;SRC;SH3GL2;DNM2;CNTN6;NUMB;RPS6KA3;SRC;FGFR1;RAC1;SH3GL2;ITGAV;MAPK1;CHL1;AP2A2;CSNK2A1;RPS6KA6;DLG4;ITGAV;ITGA2B;ITGAV;CSNK2A2;HSPA8;SCN2B;MAP2K1;MSN;EZR;AP2B1;MAP2K2;DPYSL2;RDX;ITGA1
KEGG_GNRH_SIGNALING_PATHWAY	33	55	2.7	0.00551408	0.000204146	PLA2G5;PLA2G10;PLA2G2C;MAP2K4;PRKACA;PRKCA;PTK2B;PRKCB;MAPK8;GRB2;MAPK3;SRC;MAP2K6;PLA2G12A;MAPK9;PLA2G2A;PLCB1;SRC;MAPK1;CGA;CDC42;PLA2G4A;RAF1;CAMK2D;CAMK2B;MAPK10;MMP2;MAP2K1;MAPK9;MAPK14;CGA;GNAQ;MAP2K2;MAP2K3;CGA;PLA2G12B;PLA2G1B
PID_AVB3_OPN_PATHWAY	17	23	5.1	0.00576597	0.000215696	ROCK2;ILK;ITGAV;PTK2B;MAPK8;MAPK3;SYK;SYK;PIK3CA;RAC1;ITGAV;MAPK1;RHOA;GSN;ITGAV;CDC42;GSN;ITGAV;NFKB1;MMP9;MMP2;SPP1
PID_IL1_PATHWAY	17	23	5.1	0.00576597	0.000215696	PRKCZ;TOLLIP;MAPK8;IKBKG;MAP2K6;ERC1;UBE2N;PIK3CA;IRAK4;NFKB1;IL1RN;IL1B;IL1RAP;UBE2N;IL1RAP;IL1R1;IL1R2;IKBKB;UBE2N;PRKCI;UBE2N
PID_PI3KCI_AKT_PATHWAY	18	25	4.6	0.00634621	0.000241073	PRKACA;AKT3;YWHAH;GSK3A;PDPK1;SRC;YWHAZ;AKT1;YWHAG;AKT2;GSK3B;SRC;GSK3B;BCL2L1;AKT1;BAD;YWHAG;RAF1;YWHAH;KPNA1;YWHAB;YWHAB;FOXO3;SFN
WONG_MITOCHONDRIA_GENE_MODULE	51	95	2.1	0.00644451	0.00024605	PPIF;AK2;WARS2;BCL2;CRAT;PPIF;DECR1;SCP2;ACADSB;ATP5PO;FIBP;ATP6V1C1;PDP1;NME4;TFAM;NDUFB6;DCTN6;SCP2;ALDH6A1;TIMM10;NT5M;MRPL12;ATP1B1;SCO1;HINT2;OXCT1;GOT2;HAX1;MCEE;KARS1;COX5A;ECHS1;ATP5F1B;GOT2;DIABLO;PDHX;HSD17B10;ATP5PF;DBT;AIFM1;SCO2;NDUFB4;UNG;GLUD1;GCDH;CYB5A;ACAT1;FH;COX7A2L;ATP6V1F;GSTZ1;ECI1;MTHFD2;CKMT1A
WP_HIPPO_SIGNALING_REGULATION_PATHWAYS	37	64	2.5	0.00644706	0.000249169	PRKCZ;FGFR3;PRKACA;NTRK2;PRKCA;KIT;PRKAR2B;PRKCB;INSR;CTNNB1;GNAI3;CDH5;CSF1R;PLCB1;CSF1R;PRKAA2;SMAD2;IGF1R;FLT1;SMAD3;FGFR1;FLT4;RAC1;CDH15;RHOA;CDH4;CDH17;CDC42;CDH20;PRKCQ;CTNNB1;PRKAR1A;CDH3;CDH8;STK3;GNAQ;PRKCI;CDH12;NGFR
PID_BCR_5PATHWAY	29	47	2.9	0.00644706	0.000249877	BLNK;DAPP1;CSK;LYN;BTK;LYN;MAPK8;GRB2;RASA1;MAPK3;SYK;CD22;PDPK1;IKBKG;AKT1;PTPN6;SYK;PIK3CA;DOK1;PPP3CA;PLCG2;BTK;RAC1;MAPK1;AKT1;CSNK2A1;RAF1;NFKB1;PTEN;SHC1;MAP2K1;MAPK14;IKBKB;SHC1
BIOCARTA_ECM_PATHWAY	13	16	7.8	0.0065591	0.000258013	MAPK3;PFN1;FYN;PIK3CA;ARHGAP5;MAPK1;RHOA;GSN;GSN;RAF1;PIK3CG;SHC1;MAP2K1;SHC1;DIAPH1
PID_IL8_CXCR1_PATHWAY	13	16	7.8	0.0065591	0.000258013	PRKCA;DNM1;LYN;PRKCB;LYN;RAB5A;PDPK1;CBL;AKT1;GRK2;PLCB1;ARRB1;AKT1;PIK3CG;FGR
PID_ANTHRAX_PATHWAY	13	16	7.8	0.0065591	0.000258013	MAP2K4;ANTXR1;ANTXR2;MAPK3;MAP2K6;MAPK1;IL18;IL1B;MAP2K1;DEFA1;VCAM1;MAP2K2;MAP2K3
WP_NONSMALL_CELL_LUNG_CANCER	28	45	3	0.00658477	0.000260293	PRKCA;AKT3;PRKCB;GRB2;MAPK3;ERBB2;CASP3;CRABP2;AKT1;AKT2;PIK3CA;STK4;PLCG2;MAPK1;AKT1;STAT3;BAD;STAT3;RAF1;ARAF;EGF;STAT5A;BRAF;PDK1;FHIT;MAP2K1;BID;FOXO3;MAP2K2;CYCS
REACTOME_SUPPRESSION_OF_PHAGOSOMAL_MATURATION	8	8	Inf	0.00661899	0.000265474	RAB7A;HGS;RAB5A;KPNB1;RPS27A;KPNA1;UBB;UBC
WP_BRAINDERIVED_NEUROTROPHIC_FACTOR_BDNF_SIGNALING_PATHWAY	50	93	2.1	0.00663819	0.000269057	SHC4;JAK2;NTRK2;PTK2B;EIF4E;MAPK8;GRB2;BMP2;MAPK3;CTNNB1;PDPK1;IKBKG;SRC;NCK2;RPS6KB1;CASP3;PTPN11;AKT1;MAPK9;GSK3B;EIF2S1;PRKAA2;FYN;BDNF;RPS6KA3;RAB3A;SRC;EIF2S2;GSK3B;RAC1;MAPK1;AKT1;STAT3;BAD;CSNK2A1;STAT3;CDC42;MAP2K5;PTPN11;RAF1;YBX1;NFKB1;MAPK10;STAT5A;SHC1;CTNNB1;MAP2K1;MAPK9;SPP1;MAPK14;FOXO3;IKBKB;SHC1;NCF1;MAP2K2;DPYSL2;RACK1;NGFR;BDNF
REACTOME_SIGNALING_BY_MODERATE_KINASE_ACTIVITY_BRAF_MUTANTS	20	29	4	0.00663819	0.000275205	JAK2;ITGA2B;CSK;ITGA2B;MAPK3;SRC;MAP3K11;ARRB1;SRC;MAPK1;RAF1;ARAF;ITGA2B;VWF;CAMK2D;CAMK2B;YWHAB;MARK3;BRAF;MAP2K1;YWHAB;FN1;MAP2K2;VCL
REACTOME_TNF_SIGNALING	20	29	4	0.00663819	0.000275205	USP4;IKBKG;TNFAIP3;TRADD;RNF31;RIPK1;CYLD;TRAF1;OTUD7B;BAG4;SHARPIN;RPS27A;BIRC2;USP21;UBB;UBC;IKBKB;CFLAR;RACK1;TNFRSF1A
WP_TRANSLATION_FACTORS	20	29	4	0.00663819	0.000275205	EIF4E;EIF4A1;EIF2B1;EIF2S1;GSPT2;EIF4H;EIF4A2;EIF1AY;EIF4A2;EIF2S2;EIF5A;EIF4B;EIF3B;EIF3G;EEF1D;EIF3J;EIF4G1;EIF1;EEF1G;EEF1A1;EEF1A1;EIF5
BILANGES_RAPAMYCIN_SENSITIVE_VIA_TSC1_AND_TSC2	20	29	4	0.00663819	0.000275205	VIM;NAP1L1;CS;AHCY;NAA10;BLVRB;AIMP1;ACBD6;FXR1;ACBD6;PRDX3;TOMM20;POLR1C;HSPA8;IGBP1;NUDT21;TCP1;PAICS;PPIB;PSAT1;OLA1
PID_FAS_PATHWAY	20	29	4	0.00663819	0.000275205	BTK;MAPK8;SYK;PDPK1;IKBKG;SRC;CASP3;MAP2K6;AKT1;MAPK9;SYK;PIK3CA;SRC;BTK;AKT1;RIPK1;MAPK10;SMPD1;BIRC2;MAPK9;BID;MAPK14;IKBKB;EZR;CFLAR
PID_CXCR3_PATHWAY	20	29	4	0.00663819	0.000275205	DNM1;CXCL10;MAPK3;PDPK1;GNAI3;SRC;MAP2K6;AKT1;PIK3CA;ARRB1;SRC;GNAI1;MAPK1;AKT1;CXCL13;CXCL13;ITGAL;RAF1;CXCL11;MAP2K1;MAPK14;MAP2K2;MAP2K3
REACTOME_SIGNALING_BY_TGF_BETA_RECEPTOR_COMPLEX	26	41	3.1	0.00664342	0.000278038	PRKCZ;TGFB1;PPP1CC;SMURF1;MAPK3;STUB1;UBE2D1;CBL;TGFB1;STUB1;FURIN;F11R;SMAD2;SMAD4;SMAD3;NEDD8;PPM1A;MAPK1;SMURF2;UCHL5;UBE2D3;RHOA;CDK8;RPS27A;SKIL;UBB;UBC;SERPINE1
YAO_TEMPORAL_RESPONSE_TO_PROGESTERONE_CLUSTER_12	25	39	3.2	0.00664342	0.000284632	MDK;NAP1L1;AHCY;ARL6IP5;RRAS;ANTXR2;RBP1;RAB3D;HIKESHI;CIRBP;DECR1;RAB3D;LGALS3BP;ENSA;GSTK1;NSDHL;OXCT1;NTAN1;HSD17B10;FKBP7;PIK3C3;ACP1;NUDT21;PTGR1;AKR1B10;IDH1;PTGR1
PID_NFAT_3PATHWAY	25	39	3.2	0.00664342	0.000284632	PRKCZ;PRKACA;PRKCA;PRKCB;PIM1;YWHAH;MAPK8;MAPK3;BCL2;CASP3;YWHAZ;MAPK9;YWHAG;GSK3B;KPNB1;PPP3CA;GSK3B;BCL2L1;BAD;CSNK2A1;YWHAG;PRKCQ;YWHAH;CREBBP;RAN;YWHAB;MAPK9;YWHAB;MAPK14;SFN
PID_AJDISS_2PATHWAY	25	39	3.2	0.00664342	0.000284632	RAB7A;NTRK2;HGS;CTNNB1;RAB5A;SRC;GFRA1;CASP3;GDNF;DNM2;PTPN6;ZBTB33;FYN;IGF1R;BDNF;SRC;CTNNA1;RAC1;SNX1;CTNNA1;ABL1;CDC42;CREBBP;ROBO1;EGF;CTNNB1;MMP7;NME1;BDNF
KEGG_FC_GAMMA_R_MEDIATED_PHAGOCYTOSIS	35	60	2.5	0.00664342	0.000286772	FCGR1A;VASP;PRKCA;DNM1;ARPC1B;LYN;AKT3;PRKCB;LYN;ARPC3;MAPK3;SYK;RAC2;WAS;RPS6KB1;SPHK1;AKT1;DNM2;SYK;AKT2;VAV1;PIK3CA;ARPC2;PIP4K2B;PLCG2;RAC1;ARPC5;MAPK1;AKT1;PIP4K2B;GSN;CDC42;GSN;PLA2G4A;RAF1;PIK3CG;CRK;CRKL;MAP2K1;NCF1
PID_ERBB2_ERBB3_PATHWAY	22	33	3.6	0.00664342	0.000289703	JAK2;PRKACA;MAPK8;GRB2;MAPK3;SRC;ERBB2;PTPN11;AKT1;MAPK9;PIK3CA;USP8;SRC;RAC1;MAPK1;AKT1;STAT3;BAD;STAT3;CDC42;PTPN11;RAF1;MAPK10;SHC1;MAP2K1;MAPK9;SHC1;MAP2K2
REACTOME_INTRINSIC_PATHWAY_FOR_APOPTOSIS	23	35	3.5	0.00664342	0.000290999	AKT3;YWHAH;MAPK8;MAPK3;BCL2;CASP3;YWHAZ;AKT1;YWHAG;AKT2;NMT1;BCL2L1;MAPK1;AKT1;STAT3;BAD;APAF1;STAT3;YWHAG;YWHAH;DIABLO;YWHAB;GZMB;DYNLL2;YWHAB;BID;NMT1;CYCS;SFN
REACTOME_SENESCENCE_ASSOCIATED_SECRETORY_PHENOTYPE_SASP	23	35	3.5	0.00664342	0.000290999	H2BU1;H2BC21;H2BC12;H2BC21;H2AZ1;CCNA1;ANAPC7;ANAPC10;CDK2;MAPK3;UBE2D1;CDKN2D;H3C1;RPS6KA3;CCNA2;MAPK1;STAT3;STAT3;NFKB1;RPS27A;UBB;UBC;UBE2C;UBE2S;IL6
WP_IL1_SIGNALING_PATHWAY	23	35	3.5	0.00664342	0.000290999	PRKCZ;MAP2K4;TOLLIP;MAPK8;MAPK3;IKBKG;MAP2K6;PTPN11;AKT1;MAPK9;MAPKAPK2;UBE2N;MAPK1;AKT1;PTPN11;IRAK4;NFKB1;IL1B;IL1RAP;MAP2K1;MAPK9;UBE2N;IL1RAP;IL1R1;MAPK14;IKBKB;UBE2N;MAP2K2;MAP2K3;UBE2N
KEGG_NON_SMALL_CELL_LUNG_CANCER	23	35	3.5	0.00664342	0.000290999	PRKCA;AKT3;PRKCB;GRB2;MAPK3;PDPK1;ERBB2;AKT1;AKT2;PIK3CA;STK4;PLCG2;MAPK1;AKT1;BAD;RAF1;ARAF;EGF;BRAF;PIK3CG;FHIT;MAP2K1;FOXO3;MAP2K2
REACTOME_NEGATIVE_REGULATION_OF_THE_PI3K_AKT_NETWORK	45	82	2.2	0.00664342	0.000292075	FGFR3;FGF22;KIT;AKT3;FGF3;GRB2;INSR;MAPK3;FGF5;PPP2R5A;RAC2;HGF;IER3;KLB;SRC;FGF8;ERBB2;PTPN11;IL1RL1;AKT1;THEM4;AKT2;VAV1;FYN;PIK3CA;PIP4K2B;PIP4K2A;SRC;FGFR1;RAC1;PPP2R1A;MAPK1;AKT1;PIP4K2B;PTPN11;KITLG;CD28;IRAK4;EGF;LCK;PTEN;KL;IL1RAP;FGF19;FGF19;IL1RAP;AREG;FGF18;GAB1;BTC;NRG3
REACTOME_SIGNALING_BY_FGFR	40	71	2.3	0.00682052	0.000301176	FGFBP3;GALNT3;FGFR3;FGF22;FGF3;FGFBP1;GRB2;MAPK3;FGF5;KLB;SRC;FGF8;CBL;HNRNPH1;PTPN11;POLR2K;RBFOX2;PIK3CA;SRC;FGFR1;TIA1;PPP2R1A;MKNK1;ANOS1;MAPK1;FLRT2;PTPN11;TIAL1;RPS27A;POLR2I;BRAF;SHC1;POLR2E;UBB;UBC;FGFRL1;HNRNPF;KL;FGFBP1;FGF19;FGF19;FGF18;POLR2C;GAB1;SHC1
AZARE_NEOPLASTIC_TRANSFORMATION_BY_STAT3_UP	39	69	2.4	0.00731951	0.000326033	MX1;SFRP1;SFRP1;CALD1;JAG1;OAS1;SERPINE2;FGFBP1;SRSF6;RAB5A;FLI1;NEFL;ROBO3;PTPN11;PTGS2;PID1;B4GALT1;ARHGAP25;MCL1;IFI16;CLIC4;ARHGDIB;RAB6A;PTPN11;TWF1;CLIC4;PLTP;STX10;S100A9;CXCL11;TNC;DPYSL3;DDX58;APOBEC3G;FGFBP1;VSNL1;IFI16;FN1;TNC;MCL1;TNC;G3BP2;PRSS2;TNC;HMGCS1;PRSS3;NNMT;CSF3
BANDRES_RESPONSE_TO_CARMUSTIN_MGMT_24HR_DN	14	18	6.3	0.00740048	0.000333921	MDK;IKBKG;HADH;ACTN1;PFN1;ARPC2;TRAF1;MED1;HAGH;SLC30A3;RAD51;ICAM5;PZP;GPR37
WENG_POR_TARGETS_LIVER_UP	14	18	6.3	0.00740048	0.000333921	LGALSL;ANTXR2;CD36;LGALS1;LPL;HMOX1;ASNS;IDI1;ALDH1A1;UGDH;HMGCS1;FDPS;ANXA5;PGD
BIOCARTA_STRESS_PATHWAY	14	18	6.3	0.00740048	0.000333921	ATF1;MAP2K4;MAPK8;IKBKG;TANK;CRADD;MAP2K6;TRADD;RIPK1;NFKB1;MAPK14;IKBKB;MAP2K3;TNFRSF1A
TONKS_TARGETS_OF_RUNX1_RUNX1T1_FUSION_MONOCYTE_UP	51	96	2.1	0.00760369	0.000344714	ISG15;ISG15;MX1;CSF1;MDH2;AK2;HPGDS;NAP1L1;ICAM2;OAS1;CAVIN1;CXCL10;L1CAM;CTDSPL;MDH2;HGF;BZW2;AMPD2;PES1;HOMER1;KHSRP;HSPB1;GBP1;PA2G4;RAB13;FGFR1;SNRPA1;EIF3B;TFPI;CTPS1;LPL;CSF1;DDR1;HSPD1;ANKRD40;ECHS1;DUSP6;HSPE1;PLTP;ECI2;LGALS9;DDR1;UNG;TCP1;PPME1;ARG2;GCSH;PUS1;CCL8;APLP2;HSPA5;NME1;FABP3;GLRX3;INHBA
WP_MEASLES_VIRUS_INFECTION	47	87	2.1	0.00765755	0.000351426	MX1;CDK2;OAS1;TBK1;MAPK8;IFNB1;BCL2;IKBKG;HSPA1A;CCNE1;CASP3;IFNA4;MAPK9;IRF3;TNFAIP3;HSPA1A;EIF2S1;PIK3CA;CD209;TRADD;HSPA1A;BCL2L1;STAT3;IFNAR1;HSPA6;BAD;CSNK2A1;APAF1;STAT3;HSPA1A;HSPA1A;CD28;IRAK4;HSPA1B;NFKB1;HSPA1A;HSPA1A;CSNK2A2;MAPK10;CD209;STAT5A;HSPA1A;HSPA8;IL2RG;IL1B;DDX58;TYK2;IFNA7;MSN;CD209;MAPK9;BID;IL12B;IKBKB;IL6;RACK1;CYCS;TLR4;HSPA1L
KARLSSON_TGFB1_TARGETS_UP	37	65	2.4	0.00813268	0.000381072	ZYX;TPM4;ACTN1;EIF2S1;ARHGAP26;KPNB1;SHMT2;TPM4;RWDD1;NAE1;EIF2S2;PREP;HMGA2;EEF1E1;EIF5A;TIMP1;EIF3B;CCT8;NIP7;NCL;HSPD1;MRTO4;TNFRSF9;CACYBP;TIMP1;TOMM20;HSPE1;SYNCRIP;NAE1;GARS1;EIF4G1;TCP1;HSPH1;MSN;GCSH;PELO;CDC34;ANXA2;CYCS;EIF5
BIOCARTA_AT1R_PATHWAY	15	20	5.4	0.00849005	0.000399455	MAP2K4;PRKCA;PTK2B;PRKCB;MAPK8;GRB2;MAPK3;AGT;RAC1;MAPK1;RAF1;SHC1;MAP2K1;SHC1;GNAQ;MAP2K2
BOYAULT_LIVER_CANCER_SUBCLASS_G3_UP	49	92	2.1	0.00875296	0.000413512	H2BC21;H2BC21;NME2;HGS;PLEKHF2;PPP1CC;FTH1;MAPRE1;TPD52L2;KLC1;NARS1;PGK1;RBBP4;CLIC1;POLR2K;GMFB;EIF2S1;KPNB1;SMAD2;PTP4A2;LRRC59;DUSP3;AGA;CCNA2;SNRPA1;SUB1;PSMD11;MAPRE1;GPN1;CCT5;AIMP1;DNAJC10;FXR1;EIF3B;ENO1;MRTO4;PTGES3;COPS5;MED1;LANCL1;HNRNPR;UBE2V2;PRKAR1A;USP14;G6PD;NTAQ1;NME1;SRI;ATIC;PLOD2;PGD
REACTOME_REGULATION_OF_TP53_ACTIVITY_THROUGH_ACETYLATION	11	13	9.9	0.00896076	0.000426785	AKT3;RBBP4;MAP2K6;AKT1;AKT2;PIN1;PIP4K2B;PIP4K2A;AKT1;PIP4K2B;PML;HDAC2;BRD1
REACTOME_MUSCLE_CONTRACTION	40	72	2.3	0.00925431	0.00044612	NPPA;VIM;PRKACA;CALD1;MYL9;MYL12A;AHCYL1;MYL12B;STIM1;TMOD3;ATP1B2;TPM4;FKBP1B;TPM4;ATP1B1;TNNT2;FGF12;MYL7;TMOD2;MYL6;CAMK2D;CAMK2B;NPPC;TPM2;TMOD1;SCN2B;FXYD6;MYL3;TTN;MYLPF;ANXA2;SRI;MYL5;DES;TRIM72;KCNIP4;VCL;ANXA6;ITGA1;MYBPC2;TNNI2
MALONEY_RESPONSE_TO_17AAG_UP	16	22	4.8	0.00927863	0.00045266	STAT6;MYL9;ARPC3;UBA1;MNDA;TAF10;PDAP1;SERPINH1;PLTP;CAPN1;HSPA8;PCOLCE;IGFBP2;IGFBP2;IGFBP2;PTPRU;IGFBP2;EPHA1;SERPINB9
WP_SIGNAL_TRANSDUCTION_THROUGH_IL1R	16	22	4.8	0.00927863	0.00045266	TGFB1;TGFB3;TOLLIP;MAPK8;IFNB1;MAP2K6;TGFB1;TGFB2;NFKB1;IL1RN;IL1B;IL1RAP;IL1RAP;IL1R1;MAPK14;IKBKB;IL6;MAP2K3
VANTVEER_BREAST_CANCER_POOR_PROGNOSIS	16	22	4.8	0.00927863	0.00045266	PRC1;TGFB3;RAB6B;FLT1;ESM1;GSTM3;UCHL5;OXCT1;ECI2;MMP9;CDC42BPA;IGFBP5;GMPS;FGF18;AP2B1;CCN4
REACTOME_INTERLEUKIN_17_SIGNALING	27	44	2.9	0.00943221	0.000461971	ATF1;MAP2K4;MAPK8;MAPK3;IKBKG;MAP2K6;MAPK9;MAPKAPK2;MAPKAPK3;UBE2N;DUSP3;RPS6KA3;PPP2R1A;MAPK1;DUSP6;NFKB1;RPS27A;MAPK10;UBB;UBC;MAP2K1;MAPK9;UBE2N;MAPK14;IKBKB;UBE2N;IL17RA;MAP2K3;UBE2N;IL17RE;IL17RB
WP_GLIOBLASTOMA_SIGNALING_PATHWAYS	34	59	2.5	0.00959991	0.000477738	PRKCZ;MAP2K4;PRKCA;AKT3;PRKCB;CDK2;GRB2;MAPK3;PDPK1;SRC;CCNE1;ERBB2;CBL;MAP2K6;AKT1;AKT2;PIK3CA;IGF1R;PLCG2;SRC;FGFR1;MAPK1;AKT1;MAP2K5;RAF1;ARAF;PRKCQ;PTEN;BRAF;PIK3CG;MAP2K1;FOXO3;GAB1;PRKCI;MAP2K2;MAP2K3
WP_MET_IN_TYPE_1_PAPILLARY_RENAL_CELL_CARCINOMA	26	42	2.9	0.00959991	0.000483142	AKT3;MAPK8;GRB2;MAPK3;HGF;SRC;CBL;PTPN11;AKT1;AKT2;PIK3CA;SRC;PAK4;PAK6;RAC1;MAPK1;AKT1;STAT3;BAD;STAT3;CDC42;PTPN11;RAF1;ARAF;BRAF;CRK;CRKL;MAP2K1;GAB1;MAP2K2
WP_NETRINUNC5B_SIGNALING_PATHWAY	26	42	2.9	0.00959991	0.000483142	PRKCA;PTK2B;MAPK3;SRC;CDH5;CASP3;NTN1;PTPN11;AKT1;FYN;PIK3CA;NTN1;SRC;RAC1;MAPK1;AKT1;RHOA;NEO1;DAPK1;PTPN11;RAF1;MAP2K1;ROBO4;MAPK14;VCAM1;UNC5B;AGAP2;YAP1;UNC5B;MAP2K2;NTN4;UNC5B
PID_MTOR_4PATHWAY	26	42	2.9	0.00959991	0.000483142	PRKCA;CDK2;YWHAH;EIF4E;MAPK3;PDPK1;EIF4A1;RPS6KB1;CCNE1;YWHAZ;AKT1;YWHAG;AKT1S1;RAC1;MAPK1;AKT1;EIF4B;RHOA;PML;YWHAG;RAF1;YWHAH;YWHAB;BRAF;MAP2K1;YWHAB;IKBKB;MAP2K2;CYCS;SFN
PID_IL2_1PATHWAY	26	42	2.9	0.00959991	0.000483142	PTK2B;PRKCB;CDK2;DOK2;MAPK8;GRB2;RASA1;MAPK3;BCL2;SYK;DOK2;PTPN11;MAPK9;SYK;MAPKAPK2;FYN;PIK3CA;MAPK1;STAT3;RHOA;STAT3;PTPN11;RAF1;LCK;STAT5A;SHC1;IL2RG;MAP2K1;MAPK9;MAPK14;SHC1;MAP2K2
PID_RHOA_PATHWAY	17	24	4.4	0.00972672	0.000493275	PRKCZ;MAP2K4;ROCK2;MAPK8;MAP2K6;SH3GL2;SH3GL2;RHOA;CCN1;CDC42;PTEN;MSN;EZR;MAP2K3;VCL;RDX;PKN2;DIAPH1
PID_IGF1_PATHWAY	17	24	4.4	0.00972672	0.000493275	PRKCZ;GRB2;PDPK1;NCK2;RPS6KB1;PTPN11;YWHAZ;AKT1;PIK3CA;IGF1R;AKT1;BAD;GRB10;PTPN11;RAF1;SHC1;CRK;CRKL;SHC1;RACK1
BIOCARTA_FCER1_PATHWAY	18	26	4.1	0.0102159	0.000522022	MAP2K4;LYN;BTK;PRKCB;LYN;MAPK8;GRB2;MAPK3;SYK;SYK;VAV1;PIK3CA;PPP3CA;BTK;MAPK1;PLA2G4A;RAF1;PIK3CG;SHC1;MAP2K1;FCER1A;SHC1
KEGG_ENDOMETRIAL_CANCER	23	36	3.2	0.0104215	0.000534538	ILK;AKT3;GRB2;MAPK3;CTNNB1;PDPK1;ERBB2;AKT1;AKT2;GSK3B;PIK3CA;GSK3B;CTNNA1;MAPK1;AKT1;BAD;CTNNA1;RAF1;ARAF;EGF;PTEN;BRAF;PIK3CG;CTNNB1;MAP2K1;FOXO3;MAP2K2
WP_HEPATOCYTE_GROWTH_FACTOR_RECEPTOR_SIGNALING	19	28	3.8	0.0104909	0.000540123	PTK2B;MAPK8;GRB2;RASA1;MAPK3;HGF;SRC;PTPN11;PIK3CA;SRC;MAPK1;STAT3;STAT3;PTPN11;RAF1;PTEN;CRK;CRKL;MAP2K1;GAB1;MAP2K2;ITGA1
REACTOME_SELECTIVE_AUTOPHAGY	22	34	3.3	0.0105441	0.000544896	VIM;HDAC6;SRC;PRKAA2;UBE2N;MAP1LC3B;SRC;DYNC1LI2;VCP;CSNK2A1;HSF1;TOMM20;RPS27A;CSNK2A2;HSPA8;UBB;UBC;DYNLL2;UBE2N;DYNC1LI1;ATG5;MAP1LC3A;UBE2N;CFTR;PARK7;UBE2N
WP_FIBRIN_COMPLEMENT_RECEPTOR_3_SIGNALING_PATHWAY	20	30	3.6	0.0105667	0.000549009	PLG;CXCL10;IFNB1;SYK;IKBKG;SRC;CXCL3;AKT1;IRF3;SYK;PIK3CA;SRC;AKT1;RHOA;TIRAP;LBP;IRAK4;NFKB1;PLAT;CXCL3;IL12B;IKBKB;IL6;TLR4
CAFFAREL_RESPONSE_TO_THC_24HR_5_DN	21	32	3.4	0.0105667	0.000550139	WARS1;TGFB3;COPB2;ARF4;ALG2;SHMT2;RBM4;SUB1;RAB2A;FOXM1;PPIH;RANBP1;RAB2A;ASNS;GARS1;SPINT2;PCBP2;UBE2C;PCLAF;IGFBP5;NME1;EIF5
WAKABAYASHI_ADIPOGENESIS_PPARG_RXRA_BOUND_36HR	37	66	2.3	0.0108576	0.000571563	VIM;IL15RA;SCARB2;SSPN;SNCG;ARF4;GSK3A;ACOX1;DECR1;QTRT2;NID1;YWHAG;TXNDC12;CSNK1G2;ACADM;NAA50;SF1;ACADVL;DLG4;ARC;LPL;CMPK1;EXD1;YWHAG;PSPC1;MMRN2;TMCC3;TPT1;NEGR1;ECI2;ST3GAL2;PCBP2;KTI12;ECH1;IDH1;HSDL2;SERPINE1;OXSR1
RODWELL_AGING_KIDNEY_DN	31	53	2.5	0.0111075	0.00059151	KNG1;HDAC6;KLHL3;AK2;ISOC1;PRKAA2;IMPACT;KLF9;ADH5;TMEM38B;GHR;AMT;FXR1;UCHL5;CSNK2A1;PPFIA1;OXCT1;GABARAPL1;GOT2;LPL;CACNA2D3;GOT2;BMP7;EGF;DBT;OAT;ECI2;C1orf226;KNG1;APLP2;THSD7A;CYCS;WNK1
REACTOME_DOWNREGULATION_OF_SMAD2_3_SMAD4_TRANSCRIPTIONAL_ACTIVITY	12	15	7.2	0.0111075	0.000593285	UBE2D1;SMAD2;SMAD4;SMAD3;PPM1A;SMURF2;UBE2D3;RPS27A;SKIL;UBB;UBC;SERPINE1
LAMB_CCND1_TARGETS	12	15	7.2	0.0111075	0.000593285	TGFB1;HSPA1A;TGFB1;HSPA1A;SMAD3;LGALS3BP;HSPA1A;KIF22;HSPA1A;HSPA1A;HSPA1B;HSPA1A;HSD17B10;HSPA1A;PPID;ASNS;HSPA1A;RAB31;HSPH1;LTBR;EFNA1
TIEN_INTESTINE_PROBIOTICS_6HR_DN	41	75	2.2	0.0111143	0.00059579	MRPS14;UPP1;CRIM1;CALD1;ID2;INPP5F;ETNK1;PPP2R5A;PACSIN2;UBE2D1;PLXNA1;CIRBP;TSG101;SPAST;ACTN1;PLCB1;RBFOX2;ACOT13;RWDD1;MICALL1;SAMM50;TTC1;SMPDL3A;FXR1;GABARAPL1;TMPO;NTAN1;CADM1;HEXB;DDX1;APOD;TAX1BP3;EIF1B;SPON1;PUDP;IL1R2;TCF4;RBMS1;RECQL;ANXA6;SRP19
RODWELL_AGING_KIDNEY_NO_BLOOD_DN	36	64	2.3	0.0114819	0.000619925	KNG1;KLHL3;AK2;ISOC1;AHCYL1;PRKAA2;IMPACT;KLF9;IGF1R;ADH5;TMEM38B;ALDH6A1;GHR;AMT;UCHL5;CSNK2A1;PPFIA1;OXCT1;GABARAPL1;GOT2;LPL;PRDX3;GOT2;BMP7;GSTM4;EGF;DBT;OAT;ECI2;C1orf226;KNG1;PCBP2;THRB;APLP2;CYB5A;THSD7A;CYCS;WNK1
BIOCARTA_BARR_MAPK_PATHWAY	9	10	16.2	0.0118705	0.000643193	DNM1;MAPK3;GRK2;PLCB1;ARRB1;MAPK1;RAF1;MAP2K1;MAP2K2
WATANABE_RECTAL_CANCER_RADIOTHERAPY_RESPONSIVE_DN	29	49	2.6	0.0122621	0.000675757	ITGAV;LUM;LYN;LYN;FLNA;AGRN;NID2;RAC2;ACTN1;KHSRP;GSK3B;PLPBP;LGALS1;ABR;ENSA;GSK3B;POU2AF1;ITGAV;GRB10;ITGAV;TBCC;HSPD1;ITGAV;FLNA;HSPE1;GSTP1;CAPG;PSPH;GLUD1;PCOLCE;PRKCI;CFLAR;AHSA1;ITGA1;COL6A3
KEGG_ADHERENS_JUNCTION	29	49	2.6	0.0122621	0.000675757	FER;NECTIN1;INSR;MAPK3;CTNNB1;RAC2;SRC;WAS;ERBB2;PTPN6;NECTIN1;ACTN1;FYN;SMAD2;SMAD4;IGF1R;SMAD3;SRC;CTNNA1;FGFR1;RAC1;MAPK1;RHOA;CSNK2A1;CTNNA1;ACTN4;CDC42;CREBBP;CSNK2A2;CTNNB1;ACP1;RAC3;VCL
REACTOME_PROTEIN_LOCALIZATION	43	80	2.1	0.0128154	0.000711764	CS;CRAT;VAPA;ACOX1;UBE2D1;SLC27A2;GET3;TIMM10B;SCP2;CAT;CROT;HSD17B4;SCP2;IDH3G;TIMM10;COX19;GSTK1;SAMM50;TIMM8A;UBE2D3;FIS1;UBL4A;HSPD1;HMOX1;TIMM50;ACOT8;ATP5F1B;HMGCL;STX1A;TOMM20;SGTA;RPS27A;PEX14;STX1A;ECI2;CAMLG;CHCHD10;DECR2;BAG6;UBB;UBC;DHRS4;ECH1;IDH1;CYB5A
PID_P75_NTR_PATHWAY	28	47	2.7	0.0128154	0.00071975	PRKCZ;ARHGDIA;PLG;RHOC;MAPK8;IKBKG;CASP3;AKT1;FURIN;MAPK9;PIK3CA;BDNF;RAC1;AKT1;RHOA;BAD;APAF1;NTF4;DIABLO;MAPK10;BIRC2;SHC1;OMG;RTN4R;MAPK9;MMP7;IKBKB;SHC1;PRKCI;CYCS;NGFR;BDNF
DAVIES_MULTIPLE_MYELOMA_VS_MGUS_DN	13	17	5.9	0.0128154	0.000736406	CTSG;GLUL;ACTN1;DOK1;LASP1;CD27;CAP1;RNASE6;DEFA3;ARHGAP1;MERTK;MERTK;VNN2;VCL
REACTOME_MITOCHONDRIAL_FATTY_ACID_BETA_OXIDATION	13	17	5.9	0.0128154	0.000736406	HADH;THEM4;DECR1;ACSF2;ACOT13;ACADM;ACBD6;ACADVL;ACBD6;MCEE;ECHS1;ACOT12;PCTP;ECI1
REACTOME_REGULATION_OF_SIGNALING_BY_CBL	13	17	5.9	0.0128154	0.000736406	BLNK;LYN;LYN;GRB2;SYK;CBL;SYK;VAV1;FYN;PIK3CA;RPS27A;CRK;UBB;CRKL;UBC
REACTOME_AGGREPHAGY	13	17	5.9	0.0128154	0.000736406	VIM;HDAC6;UBE2N;DYNC1LI2;VCP;HSF1;RPS27A;UBB;UBC;DYNLL2;UBE2N;DYNC1LI1;UBE2N;CFTR;PARK7;UBE2N
WP_HYPOTHESIZED_PATHWAYS_IN_PATHOGENESIS_OF_CARDIOVASCULAR_DISEASE	13	17	5.9	0.0128154	0.000736406	FLNA;MAPK8;MAPK3;POSTN;SMAD2;SMAD4;SMAD3;MAPK1;POSTN;ENG;FLNA;SHC1;MAPK14;SHC1;SERPINE1;ANGPT2;ANGPT2
BIOCARTA_PTDINS_PATHWAY	13	17	5.9	0.0128154	0.000736406	PRKCZ;LYN;BTK;JAG1;LYN;GSK3A;RAB5A;PDPK1;RPS6KB1;AKT1;GSK3B;BTK;GSK3B;RAC1;AKT1;BAD;ARF1
BIOCARTA_EDG1_PATHWAY	13	17	5.9	0.0128154	0.000736406	ITGAV;PRKCA;PRKCB;MAPK3;SPHK1;AKT1;PLCB1;PIK3CA;RAC1;ITGAV;MAPK1;AKT1;RHOA;ITGAV;ITGAV;SMPD1;PIK3CG
PID_PRL_SIGNALING_EVENTS_PATHWAY	13	17	5.9	0.0128154	0.000736406	RHOC;CDK2;MAPK3;SRC;CCNE1;AGT;PTP4A2;SRC;CCNA2;RAC1;MAPK1;RHOA;PTP4A3;ITGA1
REACTOME_SEALING_OF_THE_NUCLEAR_ENVELOPE_NE_BY_ESCRT_III	7	7	Inf	0.012899	0.000743696	CHMP2B;SPAST;IST1;VPS4A;CHMP2A;CHMP6;CHMP4A
WELCSH_BRCA1_TARGETS_DN	33	58	2.4	0.0135131	0.000786917	FGFR3;PRKACA;ANXA11;GALK1;NAA80;NARS1;RPIA;CCNE1;EIF4H;MCL1;BRD2;NMT1;H1-10;SNRPA1;MLEC;NSDHL;LMNB2;SRPK1;MTHFD1;EIF3B;CTPS1;UBL4A;HSF1;MANF;CDC37;PPM1F;KAT2A;STC1;FASN;GCSH;EDC4;KAT2A;EZR;NMT1;MCL1;ATIC
KEGG_TIGHT_JUNCTION	33	58	2.4	0.0135131	0.000786917	PRKCZ;PRKCA;MYL9;AKT3;PRKCB;RRAS;MYL12A;CTNNB1;MYL12B;VAPA;GNAI3;SRC;AKT1;F11R;ACTN1;AKT2;SRC;RAB13;CTNNA1;PPP2R1A;GNAI1;AKT1;RHOA;CSNK2A1;CTNNA1;MYL7;ACTN4;CDC42;PRKCQ;CSNK2A2;PTEN;MRAS;CTNNB1;MYLPF;PRKCI;MYL5;HCLS1
THEILGAARD_NEUTROPHIL_AT_SKIN_WOUND_UP	26	43	2.8	0.0138317	0.000809441	UPP1;RAB1A;KAT5;PLEK;IER3;EIF4A1;TANK;CXCL3;ATP6V1C1;CXCL2;LGMN;VEGFA;CXCL2;VEGFA;NFKB1;SKIL;TPP1;CXCL3;GABARAPL2;USP14;IL1B;LGMN;EEF1A1;IL1R1;IDI1;VEGFA;EEF1A1;MAP2K3;CFLAR;EIF5;OXSR1;MTHFD2
HAHTOLA_MYCOSIS_FUNGOIDES_SKIN_DN	14	19	5.1	0.014278	0.000850733	TNFSF10;ZWINT;DSTN;ECM1;CAT;B4GALT1;LGALS3BP;ANXA4;MICU2;DSTN;SCFD1;KLK7;KLK10;GRN;PRKCI
REACTOME_EGFR_DOWNREGULATION	14	19	5.1	0.014278	0.000850733	HGS;GRB2;CBL;SH3GL2;SH3GL3;SH3GL2;EPN1;CDC42;RPS27A;EGF;UBB;UBC;AREG;EPS15L1;BTC
PID_TRAIL_PATHWAY	14	19	5.1	0.014278	0.000850733	TNFSF10;MAP2K4;MAPK8;MAPK3;IKBKG;TNFRSF10B;PIK3CA;TRADD;MAPK1;RIPK1;SMPD1;TNFRSF10A;IKBKB;CFLAR
REACTOME_INTERLEUKIN_3_INTERLEUKIN_5_AND_GM_CSF_SIGNALING	24	39	2.9	0.0149105	0.000897048	JAK2;BLNK;PRKACA;LYN;LYN;GRB2;SYK;CBL;PTPN11;YWHAZ;TEC;PTPN6;SYK;VAV1;FYN;PIK3CA;PTPN11;RPS27A;STAT5A;SHC1;CRK;UBB;CRKL;IL2RG;UBC;IL3RA;IL5;SHC1
WP_RANKLRANK_SIGNALING_PATHWAY	24	39	2.9	0.0149105	0.000897048	LYN;LYN;MAPK8;MAPK3;SYK;IKBKG;SRC;CBL;MAP2K6;AKT1;MAPK9;SYK;AKT2;SRC;RAC1;MAPK1;AKT1;CALCR;SPI1;CDC42;TRAF1;NFKB1;MITF;ACP5;MAP2K1;MAPK9;MAPK14;VCAM1;IKBKB
REACTOME_SIGNALING_BY_VEGF	36	65	2.2	0.0149853	0.000916432	PRKCZ;ROCK2;PRKACA;ITGAV;PRKCA;PTK2B;AKT3;PRKCB;RASA1;CTNNB1;AHCYL1;PDPK1;SRC;NCK2;CDH5;SPHK1;AKT1;THEM4;AKT2;HSPB1;VAV1;MAPKAPK2;MAPKAPK3;FYN;PIK3CA;FLT1;SRC;CTNNA1;FLT4;RAC1;ITGAV;AKT1;RHOA;CTNNA1;ITGAV;CDC42;VEGFA;VEGFA;ITGAV;ELMO2;CRK;CTNNB1;MAPK14;VEGFA;NCF1
WP_DNA_DAMAGE_RESPONSE_ONLY_ATM_DEPENDENT	36	65	2.2	0.0149853	0.000916432	TGFB1;AKT3;MAPK8;GRB2;INSR;BCL2;CTNNB1;RAC2;ERBB2;TGFB1;AKT1;MAPK9;AKT2;GSK3B;SCP2;PIK3CA;CAT;SMAD4;SMAD3;SCP2;GSK3B;RAC1;MAPK1;AKT1;RHOA;BAD;ABL1;CDC42;NFKB1;MAPK10;PTEN;PIK3CG;SHC1;PIK3C3;PDK1;CTNNB1;MAPK9;RBL2;FOXO3;WNT5B;BCL6;RAC3;SHC1
JIANG_AGING_HYPOTHALAMUS_DN	15	21	4.5	0.0149853	0.000935936	DNM1;CS;ATP1B2;RAB18;ACHE;DNAJA2;DLG4;VTI1B;PLD3;UBC;VSNL1;SARS1;STIP1;GDI1;PTGDS
MODY_HIPPOCAMPUS_NEONATAL	15	21	4.5	0.0149853	0.000935936	L1CAM;TARS1;CCT5;CHL1;VARS1;CCT7;USP22;CCT8;LPL;TBCA;TNC;FASN;FN1;UBE2E3;TNC;TNC;TNC;FDPS
REACTOME_CD28_CO_STIMULATION	15	21	4.5	0.0149853	0.000935936	LYN;AKT3;LYN;GRB2;PDPK1;SRC;AKT1;THEM4;AKT2;VAV1;FYN;PIK3CA;SRC;RAC1;AKT1;CDC42;CD28;LCK
BIOCARTA_IL1R_PATHWAY	15	21	4.5	0.0149853	0.000935936	TGFB1;TGFB3;MAPK8;IFNB1;MAP2K6;TGFB1;TGFB2;NFKB1;IL1RN;IL1B;IL1RAP;IL1RAP;IL1R1;MAPK14;IKBKB;IL6;MAP2K3
PID_AR_NONGENOMIC_PATHWAY	15	21	4.5	0.0149853	0.000935936	MAPK3;GNAI3;SRC;AKT1;PLCB1;PIK3CA;PLCG2;SRC;RAC1;GNAI1;MAPK1;AKT1;SHBG;CDC42;RAF1;SHBG;MAP2K1;MAP2K2
PID_INSULIN_GLUCOSE_PATHWAY	15	21	4.5	0.0149853	0.000935936	PRKCZ;YWHAH;PPP1CC;INSR;TRIP10;YWHAZ;AKT1;YWHAG;AKT2;GSK3B;GSK3B;STX4;AKT1;YWHAG;RHOQ;YWHAH;YWHAB;YWHAB;PRKCI;SFN
HADDAD_T_LYMPHOCYTE_AND_NK_PROGENITOR_UP	23	37	3	0.0149853	0.000937721	TNFSF10;MDK;CAVIN1;RASA1;ILF3;HSPB1;KLF9;LRIG1;HMGA2;FXR1;INPP4B;PLXDC2;PTPRD;DLK1;DLK1;ARG2;FAM3C;GRK5;FOXO3;ALDH1A1;HSPA5;GP1BB;PLOD2;TIMP3
WP_THYMIC_STROMAL_LYMPHOPOIETIN_TSLP_SIGNALING_PATHWAY	23	37	3	0.0149853	0.000937721	JAK2;LYN;BTK;STAT6;LYN;MAPK8;MAPK3;SRC;PTPN11;TEC;AKT1;MAPK9;FYN;PIK3CA;SRC;BTK;MAPK1;AKT1;STAT3;STAT3;IL7R;PTPN11;NFKB1;LCK;STAT5A;MAP2K1;MAPK9;MAPK14;IL6;MAP2K2
LIN_APC_TARGETS	22	35	3.1	0.0153936	0.000974567	ARHGDIA;L1CAM;AGRN;CTDSPL;SYK;SYK;PFN1;DOK1;GIPC1;MAP3K11;UBA1;TGM2;EIF5A;ACTN4;HNRNPA0;PDAP1;PCDH9;RAB1B;HSPE1;HDGF;CAPN1;POLR2E;HDGF;BCAP31
REACTOME_SIGNALING_BY_EGFR	22	35	3.1	0.0153936	0.000974567	CSK;ADAM12;HGS;GRB2;SRC;CBL;PTPN11;SH3GL2;PIK3CA;SH3GL3;SRC;LRIG1;SH3GL2;EPN1;CDC42;PTPN11;RPS27A;EGF;SHC1;UBB;UBC;AREG;EPS15L1;GAB1;SHC1;BTC
REACTOME_NEGATIVE_REGULATORS_OF_DDX58_IFIH1_SIGNALING	16	23	4.1	0.015475	0.000994291	ISG15;ISG15;UBA7;TBK1;UBE2D1;IRF3;TNFAIP3;UBE2K;PIN1;UBE2D3;CYLD;RPS27A;UBB;UBC;PCBP2;DDX58;ATG5
WP_FACTORS_AND_PATHWAYS_AFFECTING_INSULINLIKE_GROWTH_FACTOR_IGF1AKT_SIGNALING	16	23	4.1	0.015475	0.000994291	ILK;EIF4E;RPS6KB1;AKT1;GSK3B;SMAD2;IGF1R;SMAD3;AKT1S1;GSK3B;AKT1;NFKB1;PTEN;PIK3CG;PDK1;IGFBP5;MAP1LC3A;TNFRSF1A
BIOCARTA_TPO_PATHWAY	16	23	4.1	0.015475	0.000994291	JAK2;PRKCA;PRKCB;GRB2;RASA1;MAPK3;MPL;PIK3CA;STAT3;CSNK2A1;STAT3;RAF1;STAT5A;PIK3CG;SHC1;MAP2K1;SHC1;THPO
PID_P38_ALPHA_BETA_PATHWAY	16	23	4.1	0.015475	0.000994291	MAP2K4;LYN;LYN;SRC;MAP2K6;FYN;SRC;CCM2;RAC1;RALB;DUSP16;RIPK1;CDC42;LCK;RALA;MAPK14;MAP2K3;FGR
GAUSSMANN_MLL_AF4_FUSION_TARGETS_C_UP	35	63	2.3	0.015475	0.000997425	TCL1B;CTSF;MAP2K4;DAPP1;NEK7;CXCL10;TLL1;HSPA1A;YWHAZ;TEC;HSPA1A;PIK3CA;SH3BGRL2;PDLIM5;MAP4K5;PUF60;CA9;LRIG1;BRD2;FLT4;HSPA1A;STAT3;IFNAR1;UBE2D3;STAT3;HSPA1A;HSPA1A;HYPK;FKBP14;HSPA1B;TOMM20;HSPA1A;HSPA1A;PTPRD;HSPA1A;FKBP7;FAM20A;PLD3;PDCD6IP;LPIN1;UGDH;TCF4;ITGA1;TIMP3
WP_TOLLLIKE_RECEPTOR_SIGNALING_PATHWAY	39	72	2.1	0.015475	0.00101895	MAP2K4;AKT3;TOLLIP;TBK1;CXCL10;MAPK8;IFNB1;MAPK3;IKBKG;MAP2K6;AKT1;IFNA4;MAPK9;IRF3;AKT2;PIK3CA;RAC1;MAPK1;AKT1;IFNAR1;TIRAP;LBP;RIPK1;IRAK4;NFKB1;MAPK10;CCL5;PIK3CG;CXCL11;IL1B;IFNA7;MAP2K1;MAPK9;SPP1;IL12B;MAPK14;IKBKB;IL6;MAP2K2;MAP2K3;CCL5;TLR4
KEGG_TOLL_LIKE_RECEPTOR_SIGNALING_PATHWAY	39	72	2.1	0.015475	0.00101895	MAP2K4;AKT3;TOLLIP;TBK1;CXCL10;MAPK8;IFNB1;MAPK3;IKBKG;MAP2K6;AKT1;IFNA4;MAPK9;IRF3;AKT2;PIK3CA;RAC1;MAPK1;AKT1;IFNAR1;TIRAP;LBP;RIPK1;IRAK4;NFKB1;MAPK10;CCL5;PIK3CG;CXCL11;IL1B;IFNA7;MAP2K1;MAPK9;SPP1;IL12B;MAPK14;IKBKB;IL6;MAP2K2;MAP2K3;CCL5;TLR4
REACTOME_G_PROTEIN_BETA_GAMMA_SIGNALLING	10	12	9	0.015475	0.00102058	BTK;AKT3;PDPK1;AKT1;PLCB1;AKT2;BTK;AKT1;RHOA;CDC42;PIK3CG;GNGT2
BIOCARTA_RHO_PATHWAY	10	12	9	0.015475	0.00102058	ARHGAP6;OPHN1;PFN1;ARHGAP5;RHOA;GSN;ARHGEF1;GSN;ARHGAP1;VCL;DIAPH1
BIOCARTA_PAR1_PATHWAY	10	12	9	0.015475	0.00102058	PRKCA;PTK2B;PRKCB;PLCB1;PIK3CA;RHOA;ARHGEF1;F2;PIK3CG;GNAQ
PID_S1P_S1P2_PATHWAY	10	12	9	0.015475	0.00102058	MAPK8;MAPK3;GNAI3;CDH5;RAC1;GNAI1;MAPK1;RHOA;MAPK14;GNAQ
WP_SYNAPTIC_SIGNALING_PATHWAYS_ASSOCIATED_WITH_AUTISM_SPECTRUM_DISORDER	17	25	3.8	0.015475	0.00102921	NTRK2;AKT3;MAPK3;RPS6KB1;AKT1;HOMER1;AKT2;GSK3B;PRKAA2;PIK3CA;BDNF;GSK3B;MAPK1;AKT1;DLG4;ARC;CAMK2B;PTEN;UBE3A;BDNF
REACTOME_MITOTIC_PROPHASE	20	31	3.3	0.015475	0.00102968	H2BU1;H2BC21;H2BC12;H2BC21;H2AZ1;PRKCA;RAB1A;VRK1;PRKCB;NEK7;MAPK3;H3C1;LMNB1;ENSA;PPP2R1A;MAPK1;RAB2A;TMPO;RAB1B;RAB2A;USO1;LPIN1
KEGG_AMYOTROPHIC_LATERAL_SCLEROSIS_ALS	20	31	3.3	0.015475	0.00102968	SOD1;BCL2;DERL1;RAB5A;CASP3;MAP2K6;NEFL;GPX1;CAT;PPP3CA;RAC1;BCL2L1;BAD;APAF1;TNFRSF1B;BID;MAPK14;TNFRSF1B;MAP2K3;CYCS;TNFRSF1A
PID_INSULIN_PATHWAY	20	31	3.3	0.015475	0.00102968	PRKCZ;GRB2;RASA1;INSR;PDPK1;TRIP10;NCK2;RPS6KB1;CBL;PTPN11;AKT1;AKT2;PIK3CA;DOK1;AKT1;GRB10;PTPN11;RHOQ;SHC1;CRK;FOXO3;SHC1;PRKCI
REACTOME_NEGATIVE_REGULATION_OF_FGFR1_SIGNALING	19	29	3.4	0.015475	0.00104347	FGF22;FGF3;GRB2;MAPK3;FGF5;SRC;FGF8;CBL;PTPN11;SRC;FGFR1;PPP2R1A;MKNK1;ANOS1;MAPK1;PTPN11;RPS27A;BRAF;UBB;UBC;KL
PID_RET_PATHWAY	19	29	3.4	0.015475	0.00104347	PRKACA;PRKCA;MAPK8;GRB2;RASA1;MAPK3;SRC;GFRA1;PTPN11;GDNF;PIK3CA;DOK1;SRC;RAC1;MAPK1;RHOA;GRB10;PTPN11;SHC1;CRK;GAB1;SHC1
WP_KISSPEPTINKISSPEPTIN_RECEPTOR_SYSTEM_IN_THE_OVARY	18	27	3.6	0.015475	0.0010444	PRKCA;PRKCB;MAPK3;GDF9;AKT1;PLCB1;AKT2;PIK3CA;ARRB1;MAPK1;AKT1;RAF1;PRKCQ;NFKB1;PIK3CG;PDK1;MMP9;MAP2K1;MAP2K2
BIOCARTA_MET_PATHWAY	18	27	3.6	0.015475	0.0010444	PTK2B;MAPK8;GRB2;RASA1;MAPK3;HGF;PTPN11;PIK3CA;MAPK1;STAT3;STAT3;PTPN11;RAF1;PTEN;PIK3CG;CRK;CRKL;MAP2K1;GAB1;MAP2K2
REACTOME_ACTIVATION_OF_BAD_AND_TRANSLOCATION_TO_MITOCHONDRIA	11	14	6.6	0.0193754	0.001345	AKT3;YWHAH;BCL2;YWHAZ;AKT1;YWHAG;AKT2;AKT1;BAD;YWHAG;YWHAH;YWHAB;YWHAB;BID;SFN
REACTOME_IKK_COMPLEX_RECRUITMENT_MEDIATED_BY_RIP1	11	14	6.6	0.0193754	0.001345	IKBKG;UBE2D1;UBE2N;UBE2D3;RIPK1;RPS27A;BIRC2;UBB;UBC;UBE2N;IKBKB;UBE2N;UBE2N;TLR4
WP_4HYDROXYTAMOXIFEN_DEXAMETHASONE_AND_RETINOIC_ACIDS_REGULATION_OF_P27_EXPRESSION	11	14	6.6	0.0193754	0.001345	EIF4E;MAPK3;MAP2K6;AKT1;MAP3K11;MKNK1;MAPK1;AKT1;RAF1;MAP2K1;MAP2K2;MAP2K3
BIOCARTA_HCMV_PATHWAY	11	14	6.6	0.0193754	0.001345	MAPK3;MAP2K6;AKT1;PIK3CA;MAPK1;AKT1;NFKB1;PIK3CG;MAP2K1;MAPK14;MAP2K2;MAP2K3
KEGG_B_CELL_RECEPTOR_SIGNALING_PATHWAY	31	55	2.3	0.0199177	0.00139032	BLNK;DAPP1;LYN;BTK;AKT3;PRKCB;LYN;GRB2;MAPK3;CR2;SYK;RAC2;CD22;IKBKG;AKT1;PTPN6;SYK;AKT2;GSK3B;VAV1;PIK3CA;PPP3CA;PLCG2;BTK;GSK3B;RAC1;MAPK1;AKT1;RAF1;NFKB1;PIK3CG;MAP2K1;IKBKB;RAC3;CD81;MAP2K2
REACTOME_EXTRA_NUCLEAR_ESTROGEN_SIGNALING	25	42	2.7	0.0199345	0.00139918	PRKCZ;AKT3;MAPK3;BCL2;PDPK1;GNAI3;SRC;SPHK1;AKT1;AKT2;HSPB1;PIK3CA;IGF1R;SRC;GNAI1;MAPK1;AKT1;PRMT1;EGF;SHC1;MMP9;MMP2;AREG;MMP7;FOXO3;SHC1;BTC;GNGT2
SIG_PIP3_SIGNALING_IN_CARDIAC_MYOCTES	25	42	2.7	0.0199345	0.00139918	AKT3;CDK2;YWHAH;GRB2;GSK3A;PDPK1;RPS6KB1;CYTH3;YWHAZ;AKT1;YWHAG;AKT2;GSK3B;PIK3CA;RPS6KA3;GSK3B;PAK4;BCL2L1;AKT1;BAD;CDC42;YWHAG;YWHAH;YWHAB;PTEN;SHC1;YWHAB;FOXO3;GAB1;SHC1;SFN
PID_FAK_PATHWAY	24	40	2.7	0.0210906	0.00148846	MAP2K4;ROCK2;ITGAV;RRAS;MAPK8;ITGA5;GRB2;RASA1;SRC;NCK2;MAPK9;ACTN1;ARHGAP26;FYN;PIK3CA;SRC;RAC1;ITGAV;MAPK1;RHOA;ITGAV;RAF1;CAPN2;ITGAV;BRAF;CRK;MAP2K1;MAPK9;VCL
BURTON_ADIPOGENESIS_8	23	38	2.8	0.0221145	0.00157796	PRDX4;ITGAV;DSTN;MAPKAPK2;MAP1LC3B;BDNF;KCTD10;PLA2G7;ITGAV;USP22;CPQ;ITGAV;DSTN;ITGAV;PLTP;RAB31;CAP1;PLD3;CAPG;MSN;VCAM1;OGN;SCPEP1;CTSA;VCL;ANXA5;PLXNB2;BDNF
PARK_TRETINOIN_RESPONSE_AND_RARA_PLZF_FUSION	12	16	5.4	0.0221145	0.0015991	UPP1;PIM1;ARHGAP45;PLEK;IER3;PTPN6;CEBPA;SPI1;LPO;IDH1;NCF1;FGR
WP_ESTROGEN_SIGNALING_PATHWAY	12	16	5.4	0.0221145	0.0015991	PRKACA;BCL2;IKBKG;AKT1;MAPK9;PIK3CA;MAPK1;AKT1;NFKB1;BRAF;MAP2K1;MAPK9;MAPK14;IKBKB
WP_MBDNF_AND_PROBDNF_REGULATION_OF_GABA_NEUROTRANSMISSION	12	16	5.4	0.0221145	0.0015991	JAK2;NTRK2;PIK3CA;BDNF;AP2A2;STAT3;RHOA;STAT3;PTEN;PIK3CG;SHC1;AP2B1;SHC1;NGFR;BDNF
BIOCARTA_RAS_PATHWAY	12	16	5.4	0.0221145	0.0015991	MAPK3;AKT1;PIK3CA;RAC1;AKT1;RHOA;BAD;CDC42;RAF1;NFKB1;PIK3CG;RALA;MAP2K1
REACTOME_ASSEMBLY_OF_THE_ORC_COMPLEX_AT_THE_ORIGIN_OF_REPLICATION	8	9	14.4	0.0222864	0.00163133	H2BU1;H2BC21;H2BC12;H2BC21;H2AZ1;H3C1;KPNB1;KPNA6;KPNA1
REACTOME_ACTIVATION_OF_IRF3_IRF7_MEDIATED_BY_TBK1_IKK_EPSILON	8	9	14.4	0.0222864	0.00163133	TBK1;TANK;PTPN11;IRF3;PTPN11;RPS27A;UBB;UBC;TLR4
WP_OSTEOPONTIN_SIGNALING	8	9	14.4	0.0222864	0.00163133	ITGAV;MAPK3;ITGAV;MAPK1;ITGAV;ITGAV;NFKB1;MMP9;MAP2K1;SPP1;IKBKB
BIOCARTA_RAB_PATHWAY	8	9	14.4	0.0222864	0.00163133	RAB7A;RAB11A;RAB1A;RAB5A;RAB3A;RAB2A;RAB6A;RAB2A;RAB4A
WP_ANDROGEN_RECEPTOR_SIGNALING_PATHWAY	29	51	2.4	0.0222864	0.00163302	ROCK2;DSTN;KAT5;FLNA;CTNNB1;STUB1;SRC;CCNE1;STUB1;AKT1;GSK3B;SMAD4;SMAD3;SRC;GSK3B;PAK6;UBE2I;RAC1;AKT1;STAT3;RHOA;STAT3;DSTN;CDC42;PIAS4;NR0B2;CREBBP;FLNA;RAN;PTEN;KLK3;CTNNB1;BAG1;ETV5;UBE3A;PARK7;RACK1;KLK3
PID_TGFBR_PATHWAY	21	34	2.9	0.0235198	0.0017506	TGFB1;TGFB3;DAB2;SMURF1;GRB2;CTNNB1;PDPK1;RPS6KB1;TGFB1;WWP1;SMAD2;SMAD4;SMAD3;EIF2A;SMURF2;RHOA;TGFB2;PML;SKIL;SHC1;CTNNB1;DYNLRB1;YAP1;SHC1
PID_AVB3_INTEGRIN_PATHWAY	28	49	2.4	0.0236765	0.00176684	CSF1;COL11A2;ILK;ITGAV;PTK2B;MAPK3;SRC;RPS6KB1;CBL;CSF1R;PTPN11;AKT1;F11R;CSF1R;PIK3CA;IGF1R;COL13A1;SRC;RAC1;ITGAV;MAPK1;AKT1;RHOA;ITGAV;CSF1;VEGFA;PTPN11;VEGFA;ITGAV;SPP1;COL6A1;MFGE8;FN1;VEGFA;COL2A1;COL15A1;VCL;COL6A3
REACTOME_RHO_GTPASES_ACTIVATE_WASPS_AND_WAVES	13	18	4.7	0.0237076	0.00178287	ARPC1B;BTK;ARPC3;GRB2;MAPK3;NCKIPSD;WAS;ARPC2;BTK;RAC1;ARPC5;MAPK1;ABL1;CDC42
WP_FATTY_ACID_BETAOXIDATION	13	18	4.7	0.0237076	0.00178287	CRAT;HADH;DECR1;ACADM;CHKB;ACSS2;ACADVL;LPL;ECHS1;TPI1;GCDH;ACAT1;ECI1
WP_INHIBITION_OF_EXOSOME_BIOGENESIS_AND_SECRETION_BY_MANUMYCIN_A_IN_CRPC_CELLS	13	18	4.7	0.0237076	0.00178287	HGS;RRAS;RAB5C;MAPK3;RAB5B;RAB5A;HNRNPH1;MAPK1;RAF1;ARAF;MRAS;BRAF;PDCD6IP
WP_TNFRELATED_WEAK_INDUCER_OF_APOPTOSIS_TWEAK_SIGNALING_PATHWAY	20	32	3	0.0240121	0.00182892	MAPK8;MAPK3;CTNNB1;CASP3;AKT1;MAPK9;AKT2;GSK3B;GSK3B;RAC1;MAPK1;AKT1;RIPK1;TRAF1;RAF1;NFKB1;CCL5;BIRC2;MMP9;CTNNB1;MAPK9;MAPK14;IKBKB;IL6;CCL5
BIOCARTA_KERATINOCYTE_PATHWAY	20	32	3	0.0240121	0.00182892	MAP2K4;PRKCA;PRKCB;MAPK8;MAPK3;BCL2;MAP2K6;CEBPA;MAPK1;RIPK1;RAF1;PRKCQ;NFKB1;EGF;MAP2K1;TNFRSF1B;MAPK14;TNFRSF1B;IKBKB;MAP2K3;TNFRSF1A
BIOCARTA_IL2RB_PATHWAY	19	30	3.1	0.0245589	0.00189753	GRB2;MAPK3;BCL2;SYK;RPS6KB1;CBL;AKT1;PTPN6;SYK;PIK3CA;MAPK1;AKT1;BAD;PPIA;RAF1;STAT5A;PIK3CG;SHC1;CRKL;IL2RG;SHC1;CFLAR
KEGG_LONG_TERM_POTENTIATION	19	30	3.1	0.0245589	0.00189753	PRKACA;PRKCA;PRKCB;PPP1CC;MAPK3;PLCB1;PPP3CA;RPS6KA3;MAPK1;RPS6KA6;RAF1;ARAF;CREBBP;CAMK2D;CAMK2B;BRAF;MAP2K1;GNAQ;MAP2K2
PID_TNF_PATHWAY	19	30	3.1	0.0245589	0.00189753	PRKCZ;IKBKG;TNFAIP3;MAP4K5;TRADD;RIPK1;CYLD;TRAF1;BAG4;NFKB1;SMPD1;BIRC2;TNFRSF1B;RFFL;TNFRSF1B;IKBKB;PRKCI;MAP2K3;RACK1;TNFRSF1A
SCHAEFFER_PROSTATE_DEVELOPMENT_6HR_UP	36	67	2.1	0.0245589	0.00189781	FGFBP3;PRKCB;FAP;RPS6KB1;KLF9;TRAPPC2;HNRNPDL;EIF2S2;ASPN;SMPDL3A;SMURF2;CXCL13;GFPT1;CXCL13;NCL;NTAN1;SYNCRIP;QPCT;COLEC12;PTEN;MBD1;TREM2;UBE2V2;SBDS;NT5C3A;ACYP2;SEMA3G;EBAG9;CD300C;HPRT1;FGF18;NAB1;OGN;ACAT1;CFTR;B2M;FABP4;TREM2;FABP4
WP_ENVELOPE_PROTEINS_AND_THEIR_POTENTIAL_ROLES_IN_EDMD_PHYSIOPATHOLOGY	14	20	4.2	0.0245589	0.00190371	TGFB1;TGFB3;GRB2;MAPK3;TGFB1;SMAD2;SMAD4;SMAD3;MAPK1;RHOA;TGFB2;TMPO;MAP2K1;SYNE2;MAP2K2
PID_NCADHERIN_PATHWAY	14	20	4.2	0.0245589	0.00190371	FER;MAPK8;MAPRE1;GAP43;CTNNB1;GJA1;PTPN11;PIK3CA;CTNNA1;FGFR1;RAC1;MAPRE1;RHOA;CTNNA1;GSN;CDC42;GSN;PTPN11;CTNNB1
LANDIS_ERBB2_BREAST_PRENEOPLASTIC_DN	18	28	3.2	0.0248768	0.00195209	PENK;PPP2R5A;CD36;DECR1;SCP2;SCP2;GHR;ABHD5;GNAI1;UCK1;BCAT2;CHCHD10;LPIN1;ALDH1A1;ALAD;APLP2;HTRA1;GSTZ1;COL6A3
BIOCARTA_P38MAPK_PATHWAY	18	28	3.2	0.0248768	0.00195209	TGFB1;MAP2K4;TGFB3;GRB2;MAP2K6;TGFB1;HSPB1;MAPKAPK2;TRADD;RAC1;MKNK1;TGFB2;RIPK1;CDC42;PLA2G4A;MAX;SHC1;MAPK14;SHC1;MAPKAPK5
ZHAN_MULTIPLE_MYELOMA_MF_UP	15	22	3.9	0.0248768	0.00197153	TMPRSS15;ABHD12;NTRK2;PYGB;ARPC1B;ARHGAP6;CD109;RNASE6;MFAP2;TYMP;SPP1;DPYSL2;ITGB7;SHMT1;TLR4
REACTOME_TGF_BETA_RECEPTOR_SIGNALING_ACTIVATES_SMADS	15	22	3.9	0.0248768	0.00197153	TGFB1;PPP1CC;SMURF1;STUB1;CBL;TGFB1;STUB1;FURIN;SMAD2;SMAD4;SMAD3;NEDD8;SMURF2;UCHL5;RPS27A;UBB;UBC
REACTOME_NUCLEAR_ENVELOPE_NE_REASSEMBLY	15	22	3.9	0.0248768	0.00197153	VRK1;CHMP2B;SIRT2;SPAST;KPNB1;LMNB1;UBE2I;IST1;PPP2R1A;VPS4A;CHMP2A;TMPO;SIRT2;RAN;CHMP6;CHMP4A
REACTOME_HSF1_DEPENDENT_TRANSACTIVATION	15	22	3.9	0.0248768	0.00197153	HSPA1A;HSPA1A;HSPB1;AKT1S1;HSPA1A;HSPA6;HSPA1A;HSPA1A;HSF1;PTGES3;HSPA1B;CREBBP;CAMK2D;SERPINH1;HSPA1A;HSPA1A;CAMK2B;HSPA1A;HSPA8;UBB;TNFRSF21;HSPH1;HSPA1L
REACTOME_SIGNALING_BY_CSF3_G_CSF	15	22	3.9	0.0248768	0.00197153	JAK2;LYN;LYN;GRB2;SYK;UBE2D1;PTPN11;SYK;STAT3;UBE2D3;STAT3;PTPN11;RPS27A;STAT5A;SHC1;UBB;UBC;TYK2;SHC1;CSF3
WP_HOSTPATHOGEN_INTERACTION_OF_HUMAN_CORONAVIRUSES_MAPK_SIGNALING	16	24	3.6	0.0250676	0.00199632	MAP2K4;EIF4E;MAPK8;MAPK3;BCL2;MAP2K6;MAPK9;MAP3K11;RPS6KA3;MAPK1;RAF1;MAPK10;MAP2K1;MAPK9;MAPK14;MAP2K2;MAP2K3
BIOCARTA_INTEGRIN_PATHWAY	16	24	3.6	0.0250676	0.00199632	CSK;MAPK8;GRB2;MAPK3;ZYX;ACTN1;FYN;MAPK1;RHOA;RAF1;CAPN1;SHC1;CRKL;MAP2K1;SHC1;MAP2K2;VCL
TENEDINI_MEGAKARYOCYTE_MARKERS	26	45	2.5	0.025615	0.00205967	TGFB1;JAK2;ITGA2B;ITGA2B;KIT;CDK2;RASA1;BCL2;CCNE1;CASP3;FLI1;TGFB1;MPL;MCL1;STAT3;BAD;STAT3;VEGFA;ITGA2B;IL11RA;VEGFA;CCL5;STAT5A;GP6;MAFG;IL1B;IL3RA;IL1R1;MAPK14;PDGFC;VEGFA;MCL1;IL6;CCL5
PID_PTP1B_PATHWAY	26	45	2.5	0.025615	0.00205967	CSF1;JAK2;ITGA2B;CSK;FER;ITGA2B;LYN;LYN;GRB2;INSR;SRC;CSF1R;AKT1;CSF1R;FYN;PIK3CA;DOK1;SRC;AKT1;STAT3;RHOA;STAT3;CSF1;YBX1;ITGA2B;EGF;LCK;STAT5A;CAPN1;SHC1;CRK;TYK2;SHC1;FGR;LEP
REACTOME_NEGATIVE_FEEDBACK_REGULATION_OF_MAPK_PATHWAY	6	6	Inf	0.0257184	0.00208286	MAPK3;MAPK1;RAF1;BRAF;MAP2K1;MAP2K2
REACTOME_PREVENTION_OF_PHAGOSOMAL_LYSOSOMAL_FUSION	6	6	Inf	0.0257184	0.00208286	RAB7A;HGS;RAB5A;RPS27A;UBB;UBC
REACTOME_SIGNALING_BY_MRAS_COMPLEX_MUTANTS	6	6	Inf	0.0257184	0.00208286	PPP1CC;RAF1;ARAF;YWHAB;MRAS;BRAF;YWHAB
REACTOME_ONCOGENIC_MAPK_SIGNALING	25	43	2.5	0.0271319	0.00221826	JAK2;ITGA2B;CSK;ITGA2B;PPP1CC;MAPK3;SRC;MAP3K11;ARRB1;SRC;DUSP16;MAPK1;FXR1;RAF1;ARAF;ITGA2B;VWF;DUSP6;CAMK2D;CAMK2B;YWHAB;MARK3;MRAS;BRAF;MAP2K1;YWHAB;FN1;MAP2K2;VCL
SCHLOSSER_SERUM_RESPONSE_UP	30	54	2.3	0.0272652	0.00224494	ICAM3;CSK;PTK2B;STAT6;RAB5C;FLNA;SLC9A3R1;BCL2;USP4;PDPK1;CRABP2;IFNA4;CSNK1G2;ARHGAP25;MAP3K11;BRD2;UBA1;FGFR1;ELL2;STAT3;SNX1;N4BP2L2;STAT3;ACTN4;FLNA;IL2RG;YJU2;CAPG;TYK2;PCOLCE;RAD51D;GAB1
YAGI_AML_SURVIVAL	30	54	2.3	0.0272652	0.00224494	VASP;INPP5F;TLL1;ZYX;HADH;UBE2D1;NAA10;TBCE;NUMB;PTP4A2;ENSA;TIA1;RAB32;CALCR;EED;GABARAP;TKT;TIAL1;HSPE1;TPM2;CA11;DDHD2;TNFRSF17;KAT2A;CD68;TYMP;KAT2A;APLP2;NME1;HMGCS1;PGD
WP_ACUTE_VIRAL_MYOCARDITIS	30	54	2.3	0.0272652	0.00224494	CD4;TGFB1;EDN1;ILK;RASA1;MAPK3;BCL2;RAC2;SRC;CASP3;TGFB1;AKT1;GSK3B;ABL2;PYCARD;FYN;EIF4G2;SRC;GSK3B;BCL2L1;AIF1;MAPK1;AKT1;STAT3;STAT3;ABL1;ITGAL;MMP9;EIF4G1;BID;IL12B;RAC3;IL6;CYCS;TLR4
HOEBEKE_LYMPHOID_STEM_CELL_DN	24	41	2.6	0.0287005	0.00238428	TNFSF10;ICAM2;SERPINE2;CTDSPL;BZW2;HSPA1A;PTPN11;AKR7A2;ACTN1;HSPA1A;HSPB1;SHMT2;CAT;ALDH6A1;IFI16;ATP1B1;HSPA1A;GABARAPL1;PTPN11;HSPA1A;HSPA1A;HSPA1B;HSPA1A;HSPA1A;HSPA1A;S100A6;TAX1BP3;ETV5;IL1B;DLK1;DLK1;IFI16;GRK5;UROD;COX7A2L
ROSS_AML_WITH_MLL_FUSIONS	24	41	2.6	0.0287005	0.00238428	MICAL1;FCGR1A;AK2;MBNL1;AKR7A2;PYCARD;LGALS1;SYT17;BLOC1S1;CPM;SPG21;HEXB;CCL23;RNASE2;MVP;CCL5;TPP1;PLD3;CAPG;GUSB;SCPEP1;RNASE3;CCL5;ANXA5;FBP1
WP_ENDOMETRIAL_CANCER	24	41	2.6	0.0287005	0.00238428	FGFR3;ILK;AKT3;GRB2;MAPK3;CTNNB1;PDPK1;ERBB2;AKT1;AKT2;GSK3B;PIK3CA;GSK3B;CTNNA1;FGFR1;MAPK1;AKT1;BAD;CTNNA1;RAF1;ARAF;EGF;PTEN;BRAF;CTNNB1;MAP2K1;FOXO3;MAP2K2
KEGG_ALPHA_LINOLENIC_ACID_METABOLISM	9	11	8.1	0.0287005	0.00240691	PLA2G5;PLA2G10;PLA2G2C;ACOX1;PLA2G12A;PLA2G2A;PLA2G4A;PLA2G12B;PLA2G1B
REACTOME_JNK_C_JUN_KINASES_PHOSPHORYLATION_AND_ACTIVATION_MEDIATED_BY_ACTIVATED_HUMAN_TAK1	9	11	8.1	0.0287005	0.00240691	MAP2K4;MAPK8;IKBKG;MAPK9;UBE2N;RPS27A;MAPK10;UBB;UBC;MAPK9;UBE2N;UBE2N;UBE2N
KEGG_ONE_CARBON_POOL_BY_FOLATE	9	11	8.1	0.0287005	0.00240691	MTHFS;SHMT2;AMT;MTHFD1;DHFR;MTHFD2L;ATIC;SHMT1;MTHFD2
REACTOME_TOLL_LIKE_RECEPTOR_9_TLR9_CASCADE	29	52	2.3	0.0290153	0.00244498	ATF1;MAP2K4;SAA1;MAPK8;MAPK3;IKBKG;MAP2K6;MAPK9;MAPKAPK2;MAPKAPK3;UBE2N;DUSP3;RPS6KA3;PPP2R1A;MAPK1;SAA1;S100A12;DUSP6;IRAK4;NFKB1;RPS27A;MAPK10;PIK3C3;UBB;UBC;MAP2K1;MAPK9;UBE2N;MAPK14;IKBKB;UBE2N;MAP2K3;UBE2N;TLR4
LAIHO_COLORECTAL_CANCER_SERRATED_UP	33	61	2.1	0.0295271	0.0024938	MRPS14;CSRP2;TAGLN2;CHMP2B;CAPZA1;MYL12B;VAPA;CLINT1;POSTN;PDLIM5;LGALS1;GBP1;ARPC2;MBD4;NEDD8;ATP1B1;TAGLN2;NPTN;POSTN;SPG21;PLA2G4A;MYL6;SNRPE;PDIA6;HSPA8;PRKAR1A;CTSB;LSM3;PDGFC;ANXA2;B2M;TCF4;DPYSL2;ANXA5;ELK3
MCBRYAN_PUBERTAL_TGFB1_TARGETS_DN	23	39	2.6	0.0298634	0.00255676	PTN;SFRP1;SFRP1;ID2;SLC9A3R1;NID2;RBBP4;CDH5;NID1;DAPK1;GZMA;KITLG;PTX3;VWF;APOD;SLPI;SPINT2;GZMA;CHI3L1;SFTPD;IFIT3;AREG;ALDH1A1;IDH1;BCL6
GROSS_HYPOXIA_VIA_HIF1A_UP	23	39	2.6	0.0298634	0.00255676	CSF1;NAP1L1;SRSF7;BZW2;PLXNA1;AMPD2;IMPACT;SHMT2;EXOSC1;MAP3K11;FRZB;MGAT4B;CTPS1;CSF1;HSPD1;HSF1;CACYBP;NUDT3;G3BP1;NSL1;PPID;USP46;CCN4;FRZB;RPL5;USP46
MIKKELSEN_MEF_LCP_WITH_H3K4ME3	32	59	2.1	0.0315809	0.00273039	WARS1;LUM;ECM1;HGF;CCL7;TNS2;POSTN;CCL7;LGALS3BP;RNASE10;TEF;ASPN;POSTN;MASP1;ARHGDIB;DDR1;CAB39;IL1RN;SERPINB8;LGALS9;DAPK3;DDR1;SCN2B;CAPG;CCDC9;PCOLCE;COL6A1;MASP1;OGN;LSP1;CCN4;BTC;NNMT;INHBA;TLR4;SERPINB9
REACTOME_RAB_GEFS_EXCHANGE_GTP_FOR_GDP_ON_RABS	22	37	2.6	0.0315809	0.00273425	RAB7A;RAB1A;RAB21;AKT3;RAB5C;RAB6B;RAB5B;RAB5A;TRAPPC6B;AKT1;AKT2;RAB18;TRAPPC2;RAB3A;RAB13;RAB32;AKT1;RAB8B;RAB6A;RAB1B;RAB14;RAB31;GDI1
REACTOME_CILIUM_ASSEMBLY	27	48	2.3	0.0329806	0.00289359	HDAC6;PRKACA;RAB11A;PRKAR2B;CEP43;RAB11FIP3;MAPRE1;ARF4;IFT22;YWHAG;LZTFL1;CEP41;MAPRE1;PPP2R1A;CCT5;ARL3;B9D2;CCT8;YWHAG;RP2;CLUAP1;UNC119B;TCP1;DYNLL2;KIF3A;PDE6D;DYNLRB1;PKD2;SSNA1
KEGG_RENAL_CELL_CARCINOMA	27	48	2.3	0.0329806	0.00289359	TGFB1;TGFB3;AKT3;GRB2;MAPK3;HGF;TGFB1;PTPN11;AKT1;AKT2;PIK3CA;PAK4;RAC1;MAPK1;AKT1;TGFB2;CDC42;VEGFA;PTPN11;RAF1;ARAF;VEGFA;CREBBP;BRAF;PIK3CG;CRK;CRKL;MAP2K1;VEGFA;GAB1;MAP2K2;FH
WP_IL2_SIGNALING_PATHWAY	21	35	2.7	0.0330308	0.00291466	PTK2B;GRB2;MAPK3;BCL2;SYK;RPS6KB1;CBL;PTPN11;AKT1;SYK;FYN;MAPK1;AKT1;STAT3;STAT3;PTPN11;RAF1;LCK;STAT5A;SHC1;CRKL;IL2RG;MAP2K1;FOXO3;SHC1;MAP2K2
WP_CORTICOTROPINRELEASING_HORMONE_SIGNALING_PATHWAY	31	57	2.2	0.0330308	0.00298867	TGFB1;PRKCA;PRKCB;MAPK8;MAPK3;BCL2;CTNNB1;CASP3;TGFB1;GJA1;AKT1;MAPK9;GSK3B;PRKAA2;ARRB1;PLCG2;GSK3B;GNAI1;MAPK1;AKT1;RHOA;RAF1;PRKCQ;NFKB1;KRT1;ERN1;BRAF;CTNNB1;IL18;MAP2K1;MAPK9;MAPK14;GNAQ;PRKCI;TCF4;TLR4
REACTOME_REGULATION_OF_KIT_SIGNALING	10	13	6	0.0330308	0.0029999	PRKCA;KIT;LYN;LYN;GRB2;SRC;CBL;PTPN6;FYN;SRC;KITLG;LCK
REACTOME_TICAM1_RIP1_MEDIATED_IKK_COMPLEX_RECRUITMENT	10	13	6	0.0330308	0.0029999	IKBKG;UBE2D1;UBE2N;UBE2D3;RIPK1;RPS27A;BIRC2;UBB;UBC;UBE2N;IKBKB;UBE2N;UBE2N
REACTOME_METABOLISM_OF_PORPHYRINS	10	13	6	0.0330308	0.0029999	HMOX2;ALB;BLVRB;HMOX1;UGT1A1;HMBS;ALAD;GSTA1;CPOX;UROD
REACTOME_ACTIVATED_TAK1_MEDIATES_P38_MAPK_ACTIVATION	10	13	6	0.0330308	0.0029999	IKBKG;MAP2K6;MAPKAPK2;MAPKAPK3;UBE2N;RPS27A;UBB;UBC;UBE2N;MAPK14;UBE2N;MAP2K3;UBE2N
REACTOME_B_WICH_COMPLEX_POSITIVELY_REGULATES_RRNA_EXPRESSION	10	13	6	0.0330308	0.0029999	H2BU1;H2BC21;H2BC12;H2BC21;H2AZ1;POLR2K;GSK3B;H3C1;GSK3B;POLR1C;POLR2E;KAT2A;KAT2A
REACTOME_LISTERIA_MONOCYTOGENES_ENTRY_INTO_HOST_CELLS	10	13	6	0.0330308	0.0029999	HGS;GRB2;CTNNB1;SRC;CBL;SH3GL2;SH3GL3;SRC;SH3GL2;RPS27A;CTNNB1;UBB;UBC
MOOTHA_FFA_OXYDATION	10	13	6	0.0330308	0.0029999	CRAT;HADH;DECR1;ACADSB;ACADM;ACADVL;ECHS1;HSD17B10;ACAT1;ECI1
BIOCARTA_SPPA_PATHWAY	10	13	6	0.0330308	0.0029999	PRKCA;PRKCB;MAPK3;SYK;SYK;PLCB1;MAPK1;PLA2G4A;RAF1;F2;MAP2K1
BIOCARTA_MAL_PATHWAY	10	13	6	0.0330308	0.0029999	MAPK8;MAPK3;RAC1;MAPK1;RHOA;CDC42;RAF1;MAP2K1;MAP2K2;DIAPH1
BIOCARTA_BARRESTIN_SRC_PATHWAY	10	13	6	0.0330308	0.0029999	DNM1;MAPK3;GRK2;PLCB1;ARRB1;MAPK1;RAF1;MAP2K1;MAP2K2;FGR
ZHAN_MULTIPLE_MYELOMA_UP	20	33	2.8	0.033792	0.0030951	H2BC21;H2BC21;EWSR1;NAA80;ILF3;USP4;H1-2;MAPKAPK3;SNX1;MASP1;EIF3B;ABL1;NAP1L4;MVP;SMPD1;CAPN1;CARS1;KAT2A;KAT2A;ECH1;PURA;MASP1;CDC34
REACTOME_CELLULAR_RESPONSE_TO_HEAT_STRESS	26	46	2.3	0.0341779	0.00314363	HDAC6;MAPK3;HIKESHI;HSPA1A;HSPA1A;GSK3B;HSPB1;MAPKAPK2;AKT1S1;VCP;GSK3B;HSPA1A;MAPK1;HSPA6;HSPA1A;HSPA1A;HSF1;PTGES3;BAG4;HSPA1B;CREBBP;CAMK2D;SERPINH1;HSPA1A;HSPA1A;CAMK2B;HSPA1A;HSPA8;BAG1;UBB;TNFRSF21;HSPH1;EEF1A1;HSPA5;EEF1A1;HSPA1L
REACTOME_GOLGI_TO_ER_RETROGRADE_TRANSPORT	26	46	2.3	0.0341779	0.00314363	RAB1A;COPB2;CAPZA1;ARF5;RAB6B;ARF4;KLC1;ARFGAP2;RAB18;DCTN6;DYNC1LI2;BICD1;KIF22;RAB6A;PLA2G4A;RAB1B;NAPG;ARF1;DYNLL2;KIF1C;KIF3A;DYNC1LI1;NAPA;KIF23;RACGAP1;TMED10
WP_NEOVASCULARISATION_PROCESSES	19	31	2.9	0.0351276	0.00327163	TGFB1;TGFB3;KIT;JAG1;MAPK8;SMAD5;MAPK3;TGFB1;AKT1;MAPK9;SMAD2;SMAD3;FLT4;MAPK1;AKT1;TGFB2;SMAD1;KITLG;NOTCH3;NFKB1;MMP9;MAPK9
TURASHVILI_BREAST_DUCTAL_CARCINOMA_VS_LOBULAR_NORMAL_UP	19	31	2.9	0.0351276	0.00327163	LRRC15;VOPP1;UBE2D1;TBCE;SFRP4;RAB18;STK4;RAC1;CCT5;SFRP4;CTHRC1;HDGFL3;PNP;PNP;IFIT3;EPS15L1;UNC5B;FN1;UNC5B;GLRX3;UNC5B;INHBA;RACGAP1
PID_GMCSF_PATHWAY	19	31	2.9	0.0351276	0.00327163	JAK2;PRKACA;LYN;PIM1;LYN;GRB2;MAPK3;SYK;PTPN11;YWHAZ;SYK;PIK3CA;MAPK1;STAT3;STAT3;PTPN11;RAF1;STAT5A;SHC1;MAP2K1;OSM;IKBKB;SHC1;MAP2K2
PID_ERBB1_INTERNALIZATION_PATHWAY	19	31	2.9	0.0351276	0.00327163	DNM1;HGS;GRB2;RAB5A;SRC;UBE2D1;CBL;TSG101;SH3GL2;PIK3CA;USP8;SRC;LRIG1;SH3GL2;EPN1;UBE2D3;CDC42;RAF1;EGF;STAMBP;SHC1;SHC1
JIANG_VHL_TARGETS	25	44	2.4	0.0358119	0.00341158	TNFSF10;HDAC6;ENO2;EWSR1;RAB11A;STK24;CDK2;ENO2;SCARB2;TRIP10;PES1;GMFB;ACOT13;TBC1D13;AIMP1;MTHFD1;ELANE;EIF3G;SPG21;RAB14;CAPN1;NFE2L1;LSM3;CFAP298;RPL26L1;LRP1
REACTOME_SIGNALING_BY_FGFR1	25	44	2.4	0.0358119	0.00341158	FGF22;FGF3;GRB2;MAPK3;FGF5;SRC;FGF8;CBL;PTPN11;PIK3CA;SRC;FGFR1;PPP2R1A;MKNK1;ANOS1;MAPK1;FLRT2;PTPN11;RPS27A;BRAF;SHC1;UBB;UBC;FGFRL1;KL;FGF18;GAB1;SHC1
AIYAR_COBRA1_TARGETS_DN	11	15	5	0.0358119	0.00341221	FGFR3;HSPB1;CPD;AAGAB;GOT2;PRDX3;KITLG;GOT2;SPINK5;BAG1;DCPS;HPRT1
KIM_LIVER_CANCER_POOR_SURVIVAL_UP	11	15	5	0.0358119	0.00341221	SPHK1;PFKFB3;ARPC2;RGS1;PKM;F3;ETV5;RALA;IGFBP3;PLOD2;ALDOA
WP_16P112_DISTAL_DELETION_SYNDROME	11	15	5	0.0358119	0.00341221	JAK2;IL4;GRB2;INSR;CR2;RAB5A;MPL;TRAF1;PRMT1;RAB4A;CD81
BIOCARTA_CXCR4_PATHWAY	11	15	5	0.0358119	0.00341221	PRKCA;PTK2B;PRKCB;MAPK3;PIK3CA;MAPK1;RAF1;NFKB1;CRK;MAP2K1;GNAQ
KYNG_DNA_DAMAGE_BY_UV	18	29	3	0.0358119	0.00343894	PRKACA;RAB7A;VASP;ADAM12;EIF4A1;SNX8;THOC1;TNFRSF10B;DLX4;STAT3;STAT3;GDF11;ACE;IL11RA;CAB39;QPCT;DBT;CNN1;CD69;GDF11
KEGG_PATHOGENIC_ESCHERICHIA_COLI_INFECTION	18	29	3	0.0358119	0.00343894	ROCK2;PRKCA;ARPC1B;ARPC3;CTNNB1;WAS;NCK2;YWHAZ;FYN;ARPC2;ARPC5;RHOA;ABL1;NCL;CDC42;CTNNB1;EZR;HCLS1;TLR4
WP_PATHOGENIC_ESCHERICHIA_COLI_INFECTION	18	29	3	0.0358119	0.00343894	ROCK2;PRKCA;ARPC1B;ARPC3;CTNNB1;WAS;NCK2;YWHAZ;FYN;ARPC2;ARPC5;RHOA;ABL1;NCL;CDC42;CTNNB1;EZR;HCLS1;TLR4
PID_IFNG_PATHWAY	18	29	3	0.0358119	0.00343894	JAK2;MAPK3;CBL;PTPN11;AKT1;PIK3CA;MAP3K11;MAPK1;AKT1;STAT3;STAT3;DAPK1;PTPN11;PIAS4;CREBBP;CAMK2D;CAMK2B;PTGES2;CRKL;IL1B;MAP2K1
PID_SYNDECAN_4_PATHWAY	18	29	3	0.0358119	0.00343894	MDK;PLG;PRKCA;ADAM12;ITGA5;DNM2;ACTN1;GIPC1;TNFRSF13B;FGFR1;RAC1;RHOA;TFPI;CCL5;F2;MMP9;TNC;FN1;TNC;TNC;TNC;CCL5
PID_EPO_PATHWAY	18	29	3	0.0358119	0.00343894	JAK2;LYN;BTK;LYN;MAPK8;GRB2;BCL2;CBL;PTPN11;TEC;PTPN6;PLCG2;BTK;BCL2L1;PTPN11;NFKB1;STAT5A;SHC1;CRKL;MAPK14;GAB1;SHC1
REACTOME_TOLL_LIKE_RECEPTOR_TLR1_TLR2_CASCADE	33	62	2.1	0.0365738	0.00352621	ATF1;MAP2K4;SAA1;BTK;MAPK8;MAPK3;CD36;IKBKG;MAP2K6;MAPK9;MAPKAPK2;MAPKAPK3;UBE2N;DUSP3;RPS6KA3;BTK;PPP2R1A;MAPK1;SAA1;TIRAP;S100A12;DUSP6;IRAK4;NFKB1;RPS27A;MAPK10;UBB;S100A9;UBC;MAP2K1;MAPK9;UBE2N;SFTPD;MAPK14;IKBKB;UBE2N;MAP2K3;UBE2N;TLR4
GAVIN_FOXP3_TARGETS_CLUSTER_T7	29	53	2.2	0.0368186	0.00357769	VIM;RUVBL1;JAK2;NRGN;FTL;RAC2;EIF3M;LGALS1;PTP4A2;UGP2;SAR1A;MTHFD1;EIF3B;ENO1;FIS1;MYL6;AKR1B1;ATP5F1B;UNC119B;AKR1B1;CDC37;GUK1;HNRNPF;SAR1A;ECH1;PNP;PDRG1;GMPS;PNP;GSTA1;HCLS1;ANXA6
REACTOME_SIGNALING_BY_MET	29	53	2.2	0.0368186	0.00357769	COL11A2;SPINT1;HGS;GRB2;HGF;SRC;CBL;RAB4B;PTPN11;SH3GL2;PIK3CA;USP8;SH3GL3;SRC;LRIG1;GGA3;RAC1;SH3GL2;STAT3;STAT3;HGFAC;PTPN11;RAB4A;RPS27A;HGFAC;SHC1;CRK;SPINT2;UBB;CRKL;UBC;FN1;GAB1;COL2A1;SHC1
REACTOME_MAP2K_AND_MAPK_ACTIVATION	17	27	3.1	0.0368186	0.00359002	ITGA2B;CSK;ITGA2B;MAPK3;SRC;ARRB1;SRC;MAPK1;LAMTOR3;RAF1;ARAF;ITGA2B;VWF;YWHAB;MARK3;BRAF;MAP2K1;YWHAB;FN1;MAP2K2;VCL
SCHEIDEREIT_IKK_INTERACTING_PROTEINS	17	27	3.1	0.0368186	0.00359002	CTNNB1;TANK;TNFAIP3;VAV1;ERC1;DOK1;ARRB1;RIPK1;CYLD;TRAF1;NOTCH3;CREBBP;CDC37;PDK1;CTNNB1;UBB;FOXO3;PRKCI
KEGG_PRION_DISEASES	17	27	3.1	0.0368186	0.00359002	SOD1;PRKACA;MAPK3;HSPA1A;C9;HSPA1A;FYN;C9;HSPA1A;MAPK1;C5;HSPA1A;HSPA1A;HSPA1B;HSPA1A;HSPA1A;NCAM2;CCL5;HSPA1A;IL1B;MAP2K1;HSPA5;IL6;MAP2K2;STIP1;C1QC;CCL5
GALE_APL_WITH_FLT3_MUTATED_UP	12	17	4.3	0.0368186	0.00366957	INPP5F;ARHGAP45;HNRNPH1;KPNB1;PMM2;UNC119B;NSL1;LANCL1;PHF11;HTATIP2;TCF12;TRMT61B
REACTOME_SIGNAL_TRANSDUCTION_BY_L1	12	17	4.3	0.0368186	0.00366957	ITGA2B;ITGAV;ITGA2B;L1CAM;ITGA5;MAPK3;FGFR1;RAC1;ITGAV;MAPK1;CSNK2A1;ITGAV;ITGA2B;ITGAV;CSNK2A2;MAP2K1;MAP2K2
REACTOME_POSITIVE_EPIGENETIC_REGULATION_OF_RRNA_EXPRESSION	12	17	4.3	0.0368186	0.00366957	H2BU1;H2BC21;H2BC12;H2BC21;H2AZ1;RBBP4;POLR2K;GSK3B;H3C1;GSK3B;POLR1C;POLR2E;KAT2A;KAT2A;HDAC2
REACTOME_TRANSCRIPTIONAL_REGULATION_BY_SMALL_RNAS	12	17	4.3	0.0368186	0.00366957	H2BU1;H2BC21;H2BC12;H2BC21;H2AZ1;POLR2K;H3C1;RAN;POLR2I;AGO1;POLR2E;POLR2C;AGO2
REACTOME_CARGO_TRAFFICKING_TO_THE_PERICILIARY_MEMBRANE	12	17	4.3	0.0368186	0.00366957	RAB11A;RAB11FIP3;ARF4;LZTFL1;CCT5;ARL3;CCT8;RP2;UNC119B;TCP1;PDE6D;PKD2
REACTOME_RHO_GTPASES_ACTIVATE_NADPH_OXIDASES	12	17	4.3	0.0368186	0.00366957	PRKCZ;PRKCA;PRKCB;MAPK3;RAC2;PIN1;RAC1;MAPK1;PIK3C3;S100A9;MAPK14;NCF1
BIOCARTA_INSULIN_PATHWAY	12	17	4.3	0.0368186	0.00366957	MAPK8;GRB2;RASA1;INSR;MAPK3;PTPN11;PIK3CA;CSNK2A1;PTPN11;RAF1;PIK3CG;SHC1;MAP2K1;SHC1
WP_CYTOSOLIC_DNASENSING_PATHWAY	24	42	2.4	0.0368186	0.00369776	ISG15;ISG15;ZBP1;TBK1;CXCL10;IFNB1;IKBKG;IFNA4;POLR2K;IRF3;PYCARD;TRADD;RIPK1;CYLD;NFKB1;CCL5;POLR1C;POLR2E;IL18;IL1B;DDX58;IFNA7;ATG5;IKBKB;IL6;CCL5
REACTOME_NEGATIVE_REGULATION_OF_FGFR3_SIGNALING	16	25	3.2	0.0368186	0.00371564	FGFR3;GRB2;MAPK3;FGF5;SRC;FGF8;CBL;PTPN11;SRC;PPP2R1A;MKNK1;MAPK1;PTPN11;RPS27A;BRAF;UBB;UBC;FGF18
REACTOME_NEGATIVE_REGULATION_OF_MAPK_PATHWAY	16	25	3.2	0.0368186	0.00371564	MAPK3;PPP2R5A;PPP2R1A;DUSP16;MAPK1;RAF1;ARAF;DUSP6;RPS27A;YWHAB;MARK3;BRAF;UBB;UBC;MAP2K1;YWHAB;MAP2K2
REACTOME_PLATELET_AGGREGATION_PLUG_FORMATION	16	25	3.2	0.0368186	0.00371564	ITGA2B;CSK;ITGA2B;GRB2;SYK;PDPK1;SRC;AKT1;MPL;SYK;SRC;AKT1;ITGA2B;VWF;GP5;F2;SHC1;CRK;FN1;GP1BB;SHC1;THPO
WP_OXIDATIVE_DAMAGE_RESPONSE	16	25	3.2	0.0368186	0.00371564	MAP2K4;BCL2;CR2;CASP3;BAD;APAF1;C5;CDC42;TRAF1;BAG4;NFKB1;MAPK10;C2;TNFRSF1B;TNFRSF1B;CYCS;C1QC
PID_ALPHA_SYNUCLEIN_PATHWAY	16	25	3.2	0.0368186	0.00371564	PTK2B;LYN;LYN;MAPK3;SYK;STUB1;SRC;STUB1;SYK;FYN;SRC;MAPK1;BAD;CSNK2A1;LCK;SNCA;KLK6;SNCA;GRK5;PARK7;FGR
LUI_THYROID_CANCER_PAX8_PPARG_UP	13	19	3.9	0.0368186	0.0038025	EVPL;SRSF6;TNFRSF10B;LASP1;DDR1;DUSP6;SERPINA1;TPM2;DDR1;ARHGAP1;IL1R1;IDI1;APLP2;GABBR2
REACTOME_MYOGENESIS	13	19	3.9	0.0368186	0.0038025	CDON;CTNNB1;MAP2K6;CTNNA1;CDH15;CTNNA1;CDH4;NEO1;ABL1;CDC42;CTNNB1;BOC;MAPK14;TCF4;TCF12
BIOCARTA_IGF1R_PATHWAY	13	19	3.9	0.0368186	0.0038025	PRKAR2B;YWHAH;GRB2;MAPK3;AKT1;PIK3CA;IGF1R;MAPK1;AKT1;BAD;RAF1;YWHAH;SHC1;PRKAR1A;MAP2K1;SHC1
PID_IL3_PATHWAY	13	19	3.9	0.0368186	0.0038025	JAK2;PRKACA;PIM1;GRB2;PTPN11;YWHAZ;YWHAG;PIK3CA;BCL2L1;YWHAG;PTPN11;STAT5A;SHC1;IL3RA;OSM;SHC1
REACTOME_TRANSCRIPTIONAL_ACTIVITY_OF_SMAD2_SMAD3_SMAD4_HETEROTRIMER	15	23	3.4	0.0368186	0.00380385	MAPK3;UBE2D1;SMAD2;SMAD4;SMAD3;PPM1A;MAPK1;SMURF2;UBE2D3;CDK8;RPS27A;SKIL;UBB;UBC;SERPINE1
REACTOME_SMOOTH_MUSCLE_CONTRACTION	15	23	3.4	0.0368186	0.00380385	CALD1;MYL9;MYL12A;MYL12B;TPM4;TPM4;MYL7;MYL6;TPM2;MYLPF;ANXA2;MYL5;TRIM72;VCL;ANXA6;ITGA1
WP_RESISTIN_AS_A_REGULATOR_OF_INFLAMMATION	15	23	3.4	0.0368186	0.00380385	AKT3;MAPK3;IKBKG;AKT1;PLCB1;AKT2;PIK3CA;PLCG2;MAPK1;AKT1;NFKB1;PIK3CG;IL12B;MAPK14;IKBKB;IL6
WP_MAPK_CASCADE	15	23	3.4	0.0368186	0.00380385	MAP2K4;RRAS;GRB2;MAPK3;MAP2K6;MAPK1;LAMTOR3;RAF1;ARAF;MAPK10;BRAF;MAP2K1;MAPK14;MAP2K2;MAP2K3
BIOCARTA_EGF_PATHWAY	15	23	3.4	0.0368186	0.00380385	MAP2K4;PRKCA;PRKCB;MAPK8;GRB2;RASA1;MAPK3;PIK3CA;STAT3;CSNK2A1;STAT3;RAF1;EGF;STAT5A;SHC1;MAP2K1;SHC1
BIOCARTA_GH_PATHWAY	15	23	3.4	0.0368186	0.00380385	JAK2;PRKCA;PRKCB;GRB2;INSR;MAPK3;PTPN6;PIK3CA;GHR;MAPK1;RAF1;STAT5A;PIK3CG;SHC1;MAP2K1;SHC1
PID_ER_NONGENOMIC_PATHWAY	15	23	3.4	0.0368186	0.00380385	ROCK2;GRB2;GNAI3;SRC;AKT1;PLCB1;PIK3CA;IGF1R;SRC;GNAI1;AKT1;RHOA;SHC1;MMP9;MMP2;MSN;SHC1;GNAQ
PID_IL2_PI3K_PATHWAY	15	23	3.4	0.0368186	0.00380385	PRKCZ;GRB2;BCL2;RPS6KB1;PTPN11;AKT1;PIK3CA;RAC1;BCL2L1;AKT1;PTPN11;NFKB1;LCK;SMPD1;SHC1;IL2RG;FOXO3;SHC1
CHANGOLKAR_H2AFY_TARGETS_UP	14	21	3.6	0.0368186	0.00383927	IVD;PTGFRN;CA1;MCL1;SMURF2;CCT8;LPL;TMCC3;TMEM70;ITPK1;GNAQ;MCL1;MYSM1;GRAMD2B;GLO1
WP_IL7_SIGNALING_PATHWAY	14	21	3.6	0.0368186	0.00383927	PTK2B;MAPK3;AKT1;GSK3B;FYN;GSK3B;BCL2L1;MAPK1;AKT1;STAT3;BAD;STAT3;IL7R;STAT5A;IL2RG;MAP2K1;MAP2K2
BIOCARTA_BAD_PATHWAY	14	21	3.6	0.0368186	0.00383927	KIT;PRKAR2B;YWHAH;MAPK3;BCL2;AKT1;PIK3CA;IGF1R;MAPK1;AKT1;BAD;KITLG;YWHAH;PIK3CG;PRKAR1A;IL3RA
PID_CD40_PATHWAY	14	21	3.6	0.0368186	0.00383927	MAP2K4;MAPK8;IL4;AKT1;MAPK9;TNFAIP3;BCL2L1;AKT1;TRAF1;NFKB1;MAPK10;BIRC2;STAT5A;C4BPA;MAPK9;MAPK14
PID_NEPHRIN_NEPH1_PATHWAY	14	21	3.6	0.0368186	0.00383927	PRKCZ;MAP2K4;MAPK8;GRB2;NCK2;AKT1;MAPK9;FYN;PIK3CA;RAC1;AKT1;BAD;MAPK10;CD2AP;MAPK9;PRKCI
PID_HEDGEHOG_GLI_PATHWAY	14	21	3.6	0.0368186	0.00383927	PRKACA;CSNK1G1;RBBP4;GNAI3;AKT1;GSK3B;CSNK1G2;GSK3B;GNAI1;AKT1;SHH;CREBBP;MAP2K1;KIF3A;RAB23;HDAC2
FLECHNER_BIOPSY_KIDNEY_TRANSPLANT_REJECTED_VS_OK_UP	32	60	2.1	0.0369784	0.00387183	CELF2;LST1;FCGR1A;WARS1;VSIG4;LCP1;ARPC1B;PRKCB;RGS10;GLUL;RAC2;GMFG;IL10RA;LCP1;ADAM15;AIF1;CD27;GZMA;LCK;CCL5;MMP9;LGALS9;RAB31;UBC;GZMA;TYMP;TNFRSF1B;PDE6D;CFD;ENTPD1;TNFRSF1B;RBMS1;HCLS1;SFN;CCL5;COL6A3
GLASS_IGF2BP1_CLIP_TARGETS_KNOCKDOWN_DN	23	40	2.4	0.037874	0.00400211	PRC1;ZWINT;NPLOC4;VOPP1;CBL;YWHAZ;AARS1;DARS2;SHMT2;IST1;MAPK1;SRPK1;CLIC4;FOXM1;HSPD1;KPNA6;PTGES3;MED1;CLIC4;AGO1;CD2AP;HNRNPF;PNP;PNP;G3BP2
REACTOME_COSTIMULATION_BY_THE_CD28_FAMILY	23	40	2.4	0.037874	0.00400211	CD4;CSK;LYN;AKT3;LYN;GRB2;PPP2R5A;PDPK1;SRC;PTPN11;AKT1;THEM4;PTPN6;AKT2;VAV1;FYN;PIK3CA;SRC;RAC1;PPP2R1A;AKT1;BTLA;CDC42;PTPN11;CD28;LCK;ICOSLG;ICOSLG
REACTOME_REGULATED_NECROSIS	23	40	2.4	0.037874	0.00400211	TNFSF10;CHMP2B;STUB1;CASP3;STUB1;TNFRSF10B;TRADD;CHMP2A;ELANE;RIPK1;RPS27A;BIRC2;CDC37;CHMP6;GZMB;IL18;UBB;UBC;IL1B;TNFRSF10A;PDCD6IP;CFLAR;CYCS;CHMP4A
PID_ANGIOPOIETIN_RECEPTOR_PATHWAY	23	40	2.4	0.037874	0.00400211	PLG;DOK2;MAPK8;ITGA5;GRB2;RASA1;MAPK3;DOK2;RPS6KB1;PTPN11;AKT1;FYN;PIK3CA;RAC1;MAPK1;AKT1;PTPN11;NFKB1;F2;STAT5A;SHC1;CRK;MMP2;MAPK14;FN1;SHC1;ANGPT2;ANGPT2
TIMOFEEVA_GROWTH_STRESS_VIA_STAT1_DN	7	8	12.6	0.0382982	0.00409125	ISG15;ISG15;HSPB1;KPNB1;MCL1;RAC1;HSF1;GSTP1;MCL1
REACTOME_METABOLISM_OF_FOLATE_AND_PTERINES	7	8	12.6	0.0382982	0.00409125	MTHFS;SHMT2;MTHFD1;DHFR;MTHFD2L;SHMT1;MTHFD2
WP_NSP1_FROM_SARSCOV2_INHIBITS_TRANSLATION_INITIATION_IN_THE_HOST_CELL	7	8	12.6	0.0382982	0.00409125	EIF2S1;EIF2S2;EIF3B;EIF3G;EIF3J;EIF1;EIF5
WP_MAPK_AND_NFKB_SIGNALING_PATHWAYS_INHIBITED_BY_YERSINIA_YOPJ	7	8	12.6	0.0382982	0.00409125	RRAS;IKBKG;MAP2K6;MAPK1;RAF1;NFKB1;IKBKB
BIOCARTA_IL4_PATHWAY	7	8	12.6	0.0382982	0.00409125	STAT6;IL4;GRB2;RPS6KB1;AKT1;AKT1;SHC1;IL2RG;SHC1
REACTOME_SIGNALING_BY_FGFR2	31	58	2.1	0.0396515	0.0042511	FGFBP3;FGF22;FGF3;FGFBP1;GRB2;MAPK3;FGF5;SRC;FGF8;CBL;HNRNPH1;PTPN11;POLR2K;RBFOX2;PIK3CA;SRC;TIA1;PPP2R1A;MKNK1;MAPK1;PTPN11;TIAL1;RPS27A;POLR2I;BRAF;SHC1;POLR2E;UBB;UBC;HNRNPF;FGFBP1;FGF18;POLR2C;GAB1;SHC1
BARIS_THYROID_CANCER_DN	22	38	2.5	0.0401882	0.00432415	TNFSF10;TGFB1;ATF1;EVPL;ERBB2;TGFB1;IGF1R;ANXA4;NEDD8;UBA1;CTNNA1;TIMP1;CTNNA1;FNTA;RAF1;OSBPL1A;TIMP1;DUSP6;HDGF;MMP2;CDH3;UBE2C;HDGF;RECQL;VCL;ACY1
REACTOME_ANTIVIRAL_MECHANISM_BY_IFN_STIMULATED_GENES	21	36	2.5	0.0425821	0.00466272	ISG15;ISG15;MX1;UBA7;OAS1;FLNA;EIF4E;MAPK3;EIF4A1;IRF3;UBE2N;KPNB1;EIF4A2;EIF4G2;PIN1;EIF4A2;KPNA5;RPS27A;FLNA;KPNA1;UBB;EIF4G1;UBC;DDX58;UBE2N;UBE2N;UBE2N
REACTOME_PEROXISOMAL_PROTEIN_IMPORT	21	36	2.5	0.0425821	0.00466272	CRAT;ACOX1;UBE2D1;SLC27A2;SCP2;CAT;CROT;HSD17B4;SCP2;GSTK1;UBE2D3;ACOT8;HMGCL;RPS27A;PEX14;ECI2;DECR2;UBB;UBC;DHRS4;ECH1;IDH1
REACTOME_PARASITE_INFECTION	21	36	2.5	0.0425821	0.00466272	ARPC1B;LYN;BTK;LYN;ARPC3;GRB2;MAPK3;NCKIPSD;SYK;SRC;WAS;SYK;VAV1;FYN;ARPC2;SRC;BTK;RAC1;ARPC5;MAPK1;ABL1;CDC42;ELMO2;CRK;FGR
WP_IL5_SIGNALING_PATHWAY	21	36	2.5	0.0425821	0.00466272	JAK2;LYN;BTK;LYN;GRB2;MAPK3;GSK3A;BCL2;SYK;RPS6KB1;PTPN11;AKT1;SYK;GSK3B;BTK;GSK3B;MAPK1;AKT1;STAT3;STAT3;PTPN11;RAF1;STAT5A;PIK3CG;SHC1;MAP2K1;FOXO3;SHC1;MAP2K2
WP_INTERLEUKIN11_SIGNALING_PATHWAY	21	36	2.5	0.0425821	0.00466272	TGFB1;ATF1;JAK2;GRB2;MAPK3;BCL2;PDPK1;SRC;RPS6KB1;TGFB1;PTPN11;AKT1;IBSP;FYN;SRC;MAPK1;AKT1;STAT3;STAT3;PTPN11;RAF1;IL11RA;TYK2;MAP2K1;IKBKB;MAP2K2;IBSP
FRIDMAN_SENESCENCE_UP	30	56	2.1	0.0425821	0.00466723	ISG15;ISG15;VIM;SOD1;NME2;RRAS;RAB5B;CDKN2D;TNFAIP3;MAP1LC3B;IFI16;EIF2S2;RAB13;RAC1;ESM1;SMURF2;GSN;GSN;IGSF3;F3;SMPD1;GUK1;RAB31;IFI16;IGFBP5;RBL2;IGFBP3;FN1;HTATIP2;IGFBP2;IGFBP2;MAP2K3;IGFBP2;IGFBP2;SERPINE1;ALDH1A3
SEITZ_NEOPLASTIC_TRANSFORMATION_BY_8P_DELETION_UP	26	47	2.2	0.0425821	0.00467211	ISG15;ISG15;MX1;PTN;ID2;OAS1;CXCL10;HPSE;BMP4;PDLIM5;GBP1;BMP4;MAPRE2;LIPG;BCHE;TMEM70;CRISPLD2;BCHE;CCL5;PRR16;CXCL11;DDX58;PNP;PNP;IFIT3;SLIT2;EFNB2;CCL5;TLR4;TIMP3;ALDH1A3
KEGG_PROGESTERONE_MEDIATED_OOCYTE_MATURATION	26	47	2.2	0.0425821	0.00467211	CCNA1;PRKACA;ANAPC7;ANAPC10;AKT3;CDK2;MAPK8;MAPK3;GNAI3;AKT1;MAPK9;AKT2;PIK3CA;IGF1R;RPS6KA3;CCNA2;GNAI1;MAPK1;AKT1;RPS6KA6;RAF1;ARAF;MAPK10;BRAF;PIK3CG;MAP2K1;MAPK9;MAPK14
REACTOME_INTEGRATION_OF_ENERGY_METABOLISM	20	34	2.6	0.0450814	0.00501581	PRKACA;PRKCA;PRKAR2B;CD36;AHCYL1;PLCB1;PRKAA2;PPP2R1A;GNAI1;PKLR;MLX;STX1A;TKT;STX1A;PRKAR1A;FASN;PKLR;GLP1R;CACNB3;ADIPOQ;GNAQ;GNGT2
WP_PYRIMIDINE_METABOLISM	25	45	2.3	0.0456931	0.00510148	UPP1;NME2;NT5C;DCTD;POLR2K;NME4;TK2;NT5M;NME7;DTYMK;UCK1;CTPS1;CMPK1;DCTPP1;POLR1C;POLR2I;POLR2E;RRM1;PNPT1;TYMP;RRM2B;ENTPD1;POLR2C;NME1;DPYS
WP_PDGF_PATHWAY	19	32	2.6	0.0480236	0.0053802	MAP2K4;ARFIP2;MAPK8;GRB2;RASA1;MAPK3;SRC;PTPN11;VAV1;SRC;RAC1;MAPK1;STAT3;RHOA;STAT3;CDC42;PLA2G4A;PTPN11;RAF1;NFKB1;SHC1;MAP2K1;SHC1
PID_TCR_PATHWAY	24	43	2.3	0.0485874	0.00556659	CD4;CSK;DBNL;PRKCA;PRKCB;FLNA;GRB2;PDPK1;IKBKG;WAS;STIM1;CBL;PTPN11;AKT1;PTPN6;VAV1;FYN;AKT1;CDC42;PTPN11;PRKCQ;CD28;FLNA;LCK;PTEN;SHC1;DBNL;IKBKB;SHC1
PID_IL12_2PATHWAY	24	43	2.3	0.0485874	0.00556659	CD4;JAK2;IL12RB1;RAB7A;STAT6;IL4;MAP2K6;PPP3CA;STAT3;STAT3;GZMA;NFKB1;LCK;IL18R1;IL18R1;STAT5A;GZMB;IL18;IL2RG;IL1B;GZMA;TYK2;IL12B;IL1R1;MAPK14;B2M;MAP2K3
PID_MYC_ACTIV_PATHWAY	24	43	2.3	0.0485874	0.00556659	RUVBL1;ID2;PIM1;NME2;KAT5;EIF4E;EIF4A1;EIF2S1;SMAD4;SMAD3;MYCT1;TAF10;ENO1;NCL;HSPD1;PRDX3;CREBBP;MAX;NDUFAF2;MMP9;EIF4G1;KAT2A;KAT2A;NME1;SHMT1
REACTOME_NEF_MEDIATES_DOWN_MODULATION_OF_CELL_SURFACE_RECEPTORS_BY_RECRUITING_THEM_TO_CLATHRIN_ADAPTERS	8	10	7.2	0.0485874	0.0055839	CD4;AP1S2;AP2A2;CD28;LCK;ARF1;AP2B1;B2M
REACTOME_APC_CDC20_MEDIATED_DEGRADATION_OF_NEK2A	8	10	7.2	0.0485874	0.0055839	ANAPC7;ANAPC10;UBE2D1;RPS27A;UBB;UBC;UBE2C;UBE2S
REACTOME_RHO_GTPASES_ACTIVATE_CIT	8	10	7.2	0.0485874	0.0055839	PRC1;RHOC;MYL9;MYL12B;RAC1;RHOA;DLG4;MYL6
REACTOME_MAP3K8_TPL2_DEPENDENT_MAPK1_3_ACTIVATION	8	10	7.2	0.0485874	0.0055839	MAP2K4;IKBKG;NFKB1;RPS27A;UBB;UBC;MAP2K1;IKBKB
REACTOME_INLB_MEDIATED_ENTRY_OF_LISTERIA_MONOCYTOGENES_INTO_HOST_CELL	8	10	7.2	0.0485874	0.0055839	HGS;GRB2;CBL;SH3GL2;SH3GL3;SH3GL2;RPS27A;UBB;UBC
REACTOME_MET_RECEPTOR_RECYCLING	8	10	7.2	0.0485874	0.0055839	GRB2;HGF;RAB4B;GGA3;RAB4A;CRK;CRKL;GAB1
WP_HEMATOPOIETIC_STEM_CELL_GENE_REGULATION_BY_GABP_ALPHABETA_COMPLEX	8	10	7.2	0.0485874	0.0055839	BCL2;SMAD4;MCL1;BCL2L1;CREBBP;PTEN;GZMB;FOXO3;MCL1
BIOCARTA_GSK3_PATHWAY	8	10	7.2	0.0485874	0.0055839	CTNNB1;PDPK1;GJA1;AKT1;GSK3B;PIK3CA;GSK3B;AKT1;LBP;NFKB1;CTNNB1
BIOCARTA_TNFR2_PATHWAY	8	10	7.2	0.0485874	0.0055839	IKBKG;TANK;TNFAIP3;RIPK1;TRAF1;NFKB1;TNFRSF1B;TNFRSF1B;IKBKB
FONTAINE_FOLLICULAR_THYROID_ADENOMA_UP	18	30	2.7	0.0494197	0.00575105	PDLIM1;UBA7;PAX8;MBNL1;CCNE1;AMPD2;MESD;LGALS3BP;FLT4;NT5C2;IL11RA;BAG6;EIF4G1;FGFRL1;WSCD2;ASGR1;PLXNB2;ECI1
WP_DEVELOPMENT_OF_URETERIC_COLLECTION_SYSTEM	18	30	2.7	0.0494197	0.00575105	ILK;CRIM1;BMP2;ROBO2;CTNNB1;GFRA1;GDNF;BMP4;ROBO2;BMP4;ANOS1;BMPER;TGFB2;SHH;GDF11;SMAD1;BMP7;ROBO1;CTNNB1;BMP5;SLIT2;GDF11
PID_LYSOPHOSPHOLIPID_PATHWAY	18	30	2.7	0.0494197	0.00575105	PTK2B;LYN;LYN;GNAI3;SRC;CASP3;AKT1;GSK3B;SRC;GSK3B;RAC1;GNAI1;AKT1;RHOA;ARHGEF1;NFKB1;CRK;MMP9;MMP2;GAB1;GNAQ;IL6
LAU_APOPTOSIS_CDKN2A_DN	5	5	Inf	0.0494197	0.00583202	AKT1;MCL1;AKT1;BAG1;FAIM;MCL1;TIMP3
MATZUK_PREOVULATORY_FOLLICLE	5	5	Inf	0.0494197	0.00583202	SOD1;ADAMTS1;IMMP2L;INHA;TNFRSF1A
LY_AGING_OLD_UP	5	5	Inf	0.0494197	0.00583202	COMP;MMP12;FMOD;HTRA1;CST6
BIOCARTA_STAT3_PATHWAY	5	5	Inf	0.0494197	0.00583202	JAK2;MAPK3;MAPK1;STAT3;STAT3;TYK2
REACTOME_NEF_MEDIATED_CD4_DOWN_REGULATION	5	5	Inf	0.0494197	0.00583202	CD4;AP2A2;LCK;ARF1;AP2B1
REACTOME_BETA_OXIDATION_OF_PRISTANOYL_COA	5	5	Inf	0.0494197	0.00583202	CRAT;SCP2;CROT;HSD17B4;SCP2;ACOT8
REACTOME_ROLE_OF_ABL_IN_ROBO_SLIT_SIGNALING	5	5	Inf	0.0494197	0.00583202	ABL2;ABL1;ROBO1;CAP1;SLIT2
REACTOME_REGULATION_OF_PTEN_LOCALIZATION	5	5	Inf	0.0494197	0.00583202	PML;RPS27A;PTEN;UBB;UBC
REACTOME_ACTIVATED_NTRK2_SIGNALS_THROUGH_FYN	5	5	Inf	0.0494197	0.00583202	NTRK2;SRC;FYN;BDNF;SRC;RAC1;BDNF
REACTOME_TRAF6_MEDIATED_IRF7_ACTIVATION_IN_TLR7_8_OR_9_SIGNALING	5	5	Inf	0.0494197	0.00583202	UBE2N;IRAK4;RPS27A;UBB;UBC;UBE2N;UBE2N;UBE2N
WP_NANOMATERIALINDUCED_INFLAMMASOME_ACTIVATION	5	5	Inf	0.0494197	0.00583202	PYCARD;NFKB1;IL1B;CTSB;TLR4
BIOCARTA_NDKDYNAMIN_PATHWAY	5	5	Inf	0.0494197	0.00583202	DNM1;NME2;PPP3CA;EPN1;NME1
LEIN_MEDULLA_MARKERS	23	41	2.3	0.0510139	0.00606933	TNKS;SERPINA3;UFC1;MINAR1;TRIP10;CROT;FBLN7;NSDHL;CCT8;FNTA;MRAP2;CAPN1;MAFG;DLK1;LYVE1;DLK1;EIF5A2;SPP1;ADGRE5;TAT;ANXA2;GLRX3;UBLCP1;ANXA5
REACTOME_INTERLEUKIN_12_SIGNALING	23	41	2.3	0.0510139	0.00606933	SOD1;JAK2;IL12RB1;LCP1;CAPZA1;CA1;LCP1;LMNB1;HNRNPDL;SNRPA1;CDC42;PPIA;CNN2;HNRNPA2B1;MIF;ARF1;MIF;TYK2;TCP1;HNRNPF;RALA;MSN;IL12B;PSME2;ANXA2
PID_IL4_2PATHWAY	23	41	2.3	0.0510139	0.00606933	JAK2;LTA;LTA;STAT6;DOK2;IL4;GRB2;DOK2;RPS6KB1;CBL;AKT1;PTPN6;PIK3CA;BCL2L1;AKT1;SPI1;CCL26;STAT5A;SHC1;IL2RG;SELP;IL5;MAPK14;CCL17;BCL6;SHC1;PIGR
ZHONG_RESPONSE_TO_AZACITIDINE_AND_TSA_DN	17	28	2.8	0.0512021	0.00612135	GOLPH3L;AP1G2;MAP2K6;CIRBP;KPNB1;CCNA2;SH3BGRL;DHFR;C11orf49;MOB1A;TBC1D5;NUDT3;PAPOLG;PPIE;HDGF;ERP44;HDGF;PAICS
VANASSE_BCL2_TARGETS_DN	17	28	2.8	0.0512021	0.00612135	MPO;CTSG;LTA;LTA;BCL2;CR2;NFKBID;PLXNC1;CFP;ANXA4;IFI16;PLA2G7;CD1D;DPH5;TRAF1;IFI16;BID;FN1;PGLYRP1
WP_THYROID_HORMONES_PRODUCTION_AND_PERIPHERAL_DOWNSTREAM_SIGNALING_EFFECTS	27	50	2.1	0.0515499	0.00617286	NPPA;PRKACA;ITGAV;PAX8;AKT3;GRB2;CTNNB1;KLB;SRC;RPS6KB1;PLCB1;GSK3B;MAPKAPK3;PIK3CA;MAP4K5;TPO;AKT1S1;SRC;GSK3B;FGFR1;ITGAV;MAPK1;BAD;RPS6KA6;SHH;ITGAV;RAF1;PRKCQ;ITGAV;CTNNB1;THRB;MAP2K1;MAPK14
PID_ILK_PATHWAY	16	26	2.9	0.0537777	0.00648112	RUVBL1;ILK;MYL9;CTNNB1;NCK2;ZYX;AKT1;ACTN1;GSK3B;PPP1R14A;GSK3B;RAC1;AKT1;NACA;CDC42;ELMO2;CDC37;CTNNB1;DIAPH1
WP_CELL_MIGRATION_AND_INVASION_THROUGH_P75NTR	16	26	2.9	0.0537777	0.00648112	EFNB3;NTRK2;AKT3;AKT1;AKT2;BDNF;RAC1;AKT1;STAT3;RHOA;STAT3;ARF1;MMP9;MMP2;MMP8;EFNB2;EFNA1;NGFR;BDNF
ZHU_CMV_8_HR_UP	16	26	2.9	0.0537777	0.00648112	ISG15;ISG15;MX1;WARS1;OAS1;CXCL10;IFNB1;PTGS2;TNFAIP3;GBP1;RIPK1;PML;LGMN;PLA2G4A;CCL5;GCH1;LGMN;IL6;CCL5
KEGG_VALINE_LEUCINE_AND_ISOLEUCINE_DEGRADATION	16	26	2.9	0.0537777	0.00648112	IVD;HADH;ACADSB;ACADM;ALDH6A1;OXCT1;BCAT2;MCEE;ECHS1;HIBCH;HMGCL;HSD17B10;DBT;ALDH7A1;ACAT1;HMGCS1
PID_MYC_PATHWAY	9	12	5.4	0.0540487	0.00656588	RUVBL1;KAT5;PPP2R5A;GSK3B;PIN1;GSK3B;TAF10;PML;MAX;KAT2A;KAT2A
REACTOME_CD28_DEPENDENT_PI3K_AKT_SIGNALING	9	12	5.4	0.0540487	0.00656588	AKT3;PDPK1;AKT1;THEM4;AKT2;FYN;PIK3CA;AKT1;CD28;LCK
BIOCARTA_EIF_PATHWAY	9	12	5.4	0.0540487	0.00656588	EIF4E;EIF4A1;EIF2S1;EIF4A2;EIF4G2;EIF4A2;EIF2S2;EIF4G1;EIF1;EIF5
BIOCARTA_SPRY_PATHWAY	9	12	5.4	0.0540487	0.00656588	GRB2;RASA1;MAPK3;CBL;MAPK1;RAF1;EGF;SHC1;MAP2K1;SHC1
PID_NFKAPPAB_ATYPICAL_PATHWAY	9	12	5.4	0.0540487	0.00656588	SYK;SRC;SYK;PIK3CA;SRC;CSNK2A1;NFKB1;LCK;CSNK2A2;MAPK14;IKBKB
PID_FOXO_PATHWAY	22	39	2.3	0.0541876	0.00661135	CDK2;YWHAH;MAPK8;CSNK1G1;CTNNB1;YWHAZ;AKT1;MAPK9;YWHAG;CAT;CSNK1G2;RALB;AKT1;YWHAG;YWHAH;CREBBP;RAN;YWHAB;MAPK10;CTNNB1;RALA;MAPK9;YWHAB;RBL2;FOXO3;IKBKB;BCL6;SFN
REACTOME_SIGNALING_BY_INSULIN_RECEPTOR	26	48	2.1	0.0550504	0.00677399	FGFR3;FGF22;FGF3;ATP6V1C2;GRB2;INSR;MAPK3;FGF5;PDPK1;KLB;FGF8;PTPN11;THEM4;AKT2;PIK3CA;ATP6V1C1;FGFR1;MAPK1;GRB10;PTPN11;SHC1;PIK3C3;KL;FGF19;FGF19;FGF18;GAB1;SHC1;ATP6V1F
GAURNIER_PSMD4_TARGETS	26	48	2.1	0.0550504	0.00677399	IL22RA1;TGFB1;IL12RB1;CXCL10;TGFB1;CXCL3;CCL13;IL21R;CCL7;CCL7;CXCL2;CXCL13;CXCL13;HLA-G;CXCL2;NFKB1;CCL23;CXCL6;IL18R1;CCL5;IL18R1;CXCL3;CCL1;CXCL11;C2;IL12B;CXCL16;CCL8;IL1R2;IL17RA;B2M;IL6;CCL5
PID_TRKR_PATHWAY	26	48	2.1	0.0550504	0.00677399	PRKCZ;NTRK2;DNM1;MATK;GRB2;RASA1;MAPK3;PTPN11;PIK3CA;BDNF;GIPC1;RAC1;MAPK1;STAT3;RHOA;STAT3;ABL1;CDC42;PTPN11;NTF4;SHC1;CRK;CRKL;FAIM;MAP2K1;GAB1;SHC1;PRKCI;NGFR;BDNF
REACTOME_RET_SIGNALING	15	24	3	0.0550504	0.00681639	GFRA3;PRKACA;PRKCA;DOK2;GRB2;DOK2;SRC;GFRA1;PTPN11;GDNF;PIK3CA;DOK1;SRC;GRB10;PTPN11;RAP1GAP;SHC1;GAB1;SHC1
WP_PDGFRBETA_PATHWAY	15	24	3	0.0550504	0.00681639	JAK2;MAP2K4;PRKCA;STAT6;PRKCB;MAPK8;GRB2;RASA1;MAPK3;PIK3CA;STAT3;STAT3;RAF1;STAT5A;SHC1;MAP2K1;SHC1
BIOCARTA_BCR_PATHWAY	15	24	3	0.0550504	0.00681639	PRKCA;LYN;BTK;PRKCB;LYN;MAPK8;GRB2;MAPK3;SYK;SYK;VAV1;PPP3CA;BTK;RAC1;RAF1;SHC1;MAP2K1;MAPK14;SHC1
BIOCARTA_PDGF_PATHWAY	15	24	3	0.0550504	0.00681639	MAP2K4;PRKCA;PRKCB;MAPK8;GRB2;RASA1;MAPK3;PIK3CA;STAT3;CSNK2A1;STAT3;RAF1;STAT5A;PIK3CG;SHC1;MAP2K1;SHC1
LIANG_HEMATOPOIESIS_STEM_CELL_NUMBER_SMALL_VS_HUGE_UP	14	22	3.2	0.0556987	0.00710782	AGRN;EIF4E;IRF6;TPM4;TFCP2L1;TPM4;ACADM;UBE2D3;EIF3B;PAWR;STX7;APLP2;FCER1A;GSTA1;GCLM
YAGI_AML_RELAPSE_PROGNOSIS	14	22	3.2	0.0556987	0.00710782	ZYX;PTP4A2;ENSA;RAB32;GABARAP;TKT;TIAL1;HSPE1;KAT2A;CD68;TYMP;KAT2A;APLP2;NME1;PGD
REACTOME_DEADENYLATION_DEPENDENT_MRNA_DECAY	14	22	3.2	0.0556987	0.00710782	EIF4E;DDX6;EIF4A1;EIF4A2;EXOSC1;EIF4A2;CNOT9;EIF4B;CNOT1;EIF4G1;DCPS;LSM3;EDC4;EXOSC8;LSM1
KEGG_RNA_DEGRADATION	14	22	3.2	0.0556987	0.00710782	ENO2;ENO2;DDX6;EXOSC1;CNOT9;ENO1;HSPD1;PAPOLG;CNOT1;DCPS;PNPT1;LSM3;EDC4;EXOSC8;LSM1
KEGG_TYPE_II_DIABETES_MELLITUS	14	22	3.2	0.0556987	0.00710782	PRKCZ;MAPK8;INSR;MAPK3;MAPK9;PIK3CA;MAPK1;PKLR;PKM;MAPK10;PIK3CG;MAPK9;PKLR;IKBKB;ADIPOQ;HK2
PID_ECADHERIN_NASCENT_AJ_PATHWAY	14	22	3.2	0.0556987	0.00710782	CTNNB1;SRC;ENAH;AKT1;PIK3CA;SRC;CTNNA1;RAC1;AKT1;RHOA;CSNK2A1;CTNNA1;CDC42;CSNK2A2;CRK;CTNNB1;NME1;ITGB7
REACTOME_ACYL_CHAIN_REMODELLING_OF_PE	10	14	4.5	0.0556987	0.00713716	PLA2G5;PLA2G10;PLA2G12A;PLA2G2A;PLA2R1;PLA2G4A;PLBD1;PLAAT2;ABHD4;PLA2G1B
WP_INTRACELLULAR_TRAFFICKING_PROTEINS_INVOLVED_IN_CMT_NEUROPATHY	10	14	4.5	0.0556987	0.00713716	RAB7A;RAB11A;RAB4B;NEFL;DNM2;HSPB1;RAB3A;RAB4A;RAB11B;LRSAM1
WP_S1P_RECEPTOR_SIGNAL_TRANSDUCTION	10	14	4.5	0.0556987	0.00713716	AKT3;MAPK3;GNAI3;SPHK1;AKT1;PLCB1;AKT2;GNAI1;MAPK1;AKT1;RACGAP1
BIOCARTA_CCR3_PATHWAY	10	14	4.5	0.0556987	0.00713716	ROCK2;PRKCA;PRKCB;MAPK3;PLCB1;MAPK1;RHOA;RAF1;MAP2K1;GNAQ
BIOCARTA_IGF1MTOR_PATHWAY	10	14	4.5	0.0556987	0.00713716	EIF4E;PDPK1;RPS6KB1;AKT1;GSK3B;EIF2S1;PIK3CA;IGF1R;EIF2S2;GSK3B;AKT1;PTEN
BIOCARTA_TGFB_PATHWAY	10	14	4.5	0.0556987	0.00713716	TGFB1;TGFB3;MAPK3;TGFB1;SMAD2;SMAD4;SMAD3;TGFB2;CREBBP;SKIL;MAP2K1
PID_S1P_S1P1_PATHWAY	10	14	4.5	0.0556987	0.00713716	ITGAV;MAPK3;GNAI3;SPHK1;PTGS2;RAC1;GNAI1;ITGAV;MAPK1;RHOA;ITGAV;VEGFA;VEGFA;ITGAV;VEGFA
ROSS_LEUKEMIA_WITH_MLL_FUSIONS	21	37	2.4	0.0556987	0.00719384	MICAL1;AK2;ARL6IP5;DAB2;MBNL1;RAC2;C9;AKR7A2;SCP2;LGALS1;SCP2;ARPC2;C9;HEXB;CCL23;CCL5;PLD3;CAPG;FAIM;SCPEP1;HCLS1;RNASE3;CCL5;ANXA5
WP_TGFBETA_RECEPTOR_SIGNALING_IN_SKELETAL_DYSPLASIAS	21	37	2.4	0.0556987	0.00719384	TGFB1;SMAD5;MAPK3;CTNNB1;TGFB1;MAPK9;BMP4;SMAD2;SMAD4;SMAD3;LEFTY2;BMP4;STAT3;STAT3;ADAMTSL2;SMAD1;ENG;NFKB1;CREBBP;EGF;SKIL;CTNNB1;LEFTY2;MAPK9;SPP1;SERPINE1;INHBA
KEGG_ADIPOCYTOKINE_SIGNALING_PATHWAY	21	37	2.4	0.0556987	0.00719384	JAK2;AKT3;MAPK8;CD36;IKBKG;PTPN11;AKT1;MAPK9;AKT2;PRKAA2;TRADD;AKT1;STAT3;STAT3;PTPN11;PRKCQ;NFKB1;MAPK10;MAPK9;TNFRSF1B;PPARA;TNFRSF1B;IKBKB;ADIPOQ;LEP;TNFRSF1A
KEGG_EPITHELIAL_CELL_SIGNALING_IN_HELICOBACTER_PYLORI_INFECTION	21	37	2.4	0.0556987	0.00719384	MAP2K4;CSK;LYN;LYN;ATP6V1C2;MAPK8;IKBKG;SRC;CASP3;PTPN11;MAPK9;F11R;ATP6V1C1;PLCG2;SRC;RAC1;CDC42;PTPN11;NFKB1;MAPK10;CCL5;MAPK9;MAPK14;IKBKB;CCL5;ATP6V1F
TOMLINS_PROSTATE_CANCER_UP	13	20	3.3	0.0556987	0.0073288	RAB11A;EIF4A1;PDLIM5;HSD17B4;BICD1;NACA;DAPK1;MANF;PAICS;GUSB;UGDH;PPIB;RACK1
REACTOME_MTOR_SIGNALLING	13	20	3.3	0.0556987	0.0073288	EIF4E;RPS6KB1;CAB39L;AKT1;AKT2;PRKAA2;AKT1S1;PPM1A;AKT1;EIF4B;LAMTOR3;CAB39;YWHAB;EIF4G1;YWHAB
REACTOME_HSF1_ACTIVATION	13	20	3.3	0.0556987	0.0073288	HDAC6;HSPA1A;HSPA1A;HSPB1;VCP;HSPA1A;HSPA6;HSPA1A;HSPA1A;HSF1;PTGES3;HSPA1B;SERPINH1;HSPA1A;HSPA1A;HSPA1A;UBB;TNFRSF21;HSPH1;EEF1A1;EEF1A1;HSPA1L
REACTOME_RNA_POLYMERASE_I_TRANSCRIPTION	13	20	3.3	0.0556987	0.0073288	H2BU1;H2BC21;H2BC12;H2BC21;H2AZ1;CAVIN1;MAPK3;RBBP4;POLR2K;H3C1;POLR1C;POLR2E;KAT2A;KAT2A;HDAC2
WP_TRANSSULFURATION_AND_ONECARBON_METABOLISM	13	20	3.3	0.0556987	0.0073288	AHCY;AHCYL1;SHMT2;AMT;MTHFD1;DHFR;GSS;MTHFD2L;PSPH;PSAT1;SHMT1;MTHFD2;GCLM
WP_DISRUPTION_OF_POSTSYNAPTIC_SIGNALING_BY_CNV	13	20	3.3	0.0556987	0.0073288	MAPK3;NRXN1;HOMER1;YWHAG;MAPK1;ARC;YWHAG;DLG2;STX1A;CAMK2D;CAMK2B;STX1A;NLGN4X;FMR1;NRXN3;NRXN3
WP_REGUCALCIN_IN_PROXIMAL_TUBULE_EPITHELIAL_KIDNEY_CELLS	13	20	3.3	0.0556987	0.0073288	TGFB1;CASP3;TGFB1;AKT1;PIK3CA;SMAD2;SMAD4;MAPK1;AKT1;APAF1;RAF1;PRKCQ;G3BP1;BRAF;TNFRSF1A
BIOCARTA_FMLP_PATHWAY	13	20	3.3	0.0556987	0.0073288	MAPK3;MAP2K6;PLCB1;PPP3CA;RAC1;MAPK1;RAF1;NFKB1;MAP2K1;MAPK14;NCF1;MAP2K2;MAP2K3
BIOCARTA_GLEEVEC_PATHWAY	13	20	3.3	0.0556987	0.0073288	JAK2;MAP2K4;MAPK8;GRB2;MAPK3;AKT1;PIK3CA;AKT1;BAD;RAF1;STAT5A;PIK3CG;CRKL;MAP2K1
FLECHNER_PBL_KIDNEY_TRANSPLANT_OK_VS_DONOR_DN	11	16	4	0.0556987	0.00740104	RAB11A;PAX8;LYN;LYN;FLI1;MKNK1;ABL1;IL1B;MAPK14;UBE2E3;PPP1R10;ANXA5
REACTOME_DOWNREGULATION_OF_TGF_BETA_RECEPTOR_SIGNALING	11	16	4	0.0556987	0.00740104	TGFB1;PPP1CC;SMURF1;STUB1;TGFB1;STUB1;SMAD2;SMAD3;SMURF2;UCHL5;RPS27A;UBB;UBC
REACTOME_NEGATIVE_REGULATION_OF_MET_ACTIVITY	11	16	4	0.0556987	0.00740104	HGS;GRB2;HGF;CBL;SH3GL2;USP8;SH3GL3;LRIG1;SH3GL2;RPS27A;UBB;UBC
WP_TLR4_SIGNALING_AND_TOLERANCE	11	16	4	0.0556987	0.00740104	TBK1;IFNB1;IKBKG;IRF3;TIRAP;RIPK1;IRAK4;NFKB1;IKBKB;IL6;TLR4
WP_FAMILIAL_PARTIAL_LIPODYSTROPHY_FPLD	11	16	4	0.0556987	0.00740104	MAPK9;AKT2;KLF9;PIK3CA;CEBPA;LMNB1;LMNB2;LPL;FNTA;MAPK9;PPARA;FABP4;FABP4
WP_INFLUENCE_OF_LAMINOPATHIES_ON_WNT_SIGNALING	11	16	4	0.0556987	0.00740104	CTNNB1;HES5;GSK3B;CEBPA;GSK3B;HMGA2;FNTA;CTNNB1;TOR1AIP1;HES1;SPP1;ADIPOQ;AGO2
BENNETT_SYSTEMIC_LUPUS_ERYTHEMATOSUS	11	16	4	0.0556987	0.00740104	ISG15;ISG15;TNFSF10;MX1;OAS1;AGRN;SERPING1;LGALS3BP;RNASE2;DEFA3;DEFA1;IFIT3
BIOCARTA_MTOR_PATHWAY	11	16	4	0.0556987	0.00740104	EIF4E;PDPK1;EIF4A1;RPS6KB1;AKT1;PIK3CA;EIF4A2;EIF4G2;EIF4A2;MKNK1;AKT1;PTEN;EIF4G1
BIOCARTA_NKCELLS_PATHWAY	11	16	4	0.0556987	0.00740104	PTK2B;MAPK3;SYK;PTPN6;SYK;VAV1;PIK3CA;KLRC3;RAC1;IL18;MAP2K1;B2M
PID_NFKAPPAB_CANONICAL_PATHWAY	11	16	4	0.0556987	0.00740104	PRKCA;IKBKG;TNFAIP3;ERC1;UBE2D3;CYLD;NFKB1;RAN;BIRC2;IKBKB;TNFRSF1A
PID_ECADHERIN_KERATINOCYTE_PATHWAY	11	16	4	0.0556987	0.00740104	VASP;CTNNB1;SRC;ZYX;AKT1;AKT2;FYN;PIK3CA;SRC;CTNNA1;RAC1;AKT1;RHOA;CTNNA1;CTNNB1
REACTOME_ATTENUATION_PHASE	12	18	3.6	0.0556987	0.00744296	HSPA1A;HSPA1A;HSPB1;HSPA1A;HSPA6;HSPA1A;HSPA1A;HSF1;PTGES3;HSPA1B;CREBBP;SERPINH1;HSPA1A;HSPA1A;HSPA1A;HSPA8;UBB;TNFRSF21;HSPH1;HSPA1L
REACTOME_INACTIVATION_OF_CSF3_G_CSF_SIGNALING	12	18	3.6	0.0556987	0.00744296	JAK2;LYN;LYN;SYK;UBE2D1;SYK;STAT3;UBE2D3;STAT3;RPS27A;STAT5A;UBB;UBC;TYK2;CSF3
WP_HOSTPATHOGEN_INTERACTION_OF_HUMAN_CORONAVIRUSES_INTERFERON_INDUCTION	12	18	3.6	0.0556987	0.00744296	OAS1;TBK1;MAPK8;IKBKG;IRF3;IFNAR1;RIPK1;NFKB1;DDX58;TYK2;MAPK14;IKBKB
WP_PHYSIOLOGICAL_AND_PATHOLOGICAL_HYPERTROPHY_OF_THE_HEART	12	18	3.6	0.0556987	0.00744296	EDN1;PRKCB;MAPK8;AGT;PPP3CA;RAC1;MAPK1;STAT3;RHOA;STAT3;CAMK2D;MAPK14;MAP2K3
LU_TUMOR_VASCULATURE_UP	12	18	3.6	0.0556987	0.00744296	ISG15;ISG15;ADAM12;HOPX;POSTN;POSTN;HSPA6;PLXDC1;MUC1;MMP9;TNFRSF21;STC1;SPP1;EGFL6
HAN_JNK_SINGALING_UP	12	18	3.6	0.0556987	0.00744296	ISG15;ISG15;CXCL10;IL1RL1;IMPACT;DUSP16;CCN1;CCL5;TNC;FAM3C;IFIT3;TNC;TNC;DPT;EFNB2;TNC;CCL5
BIOCARTA_IGF1_PATHWAY	12	18	3.6	0.0556987	0.00744296	MAPK8;GRB2;RASA1;MAPK3;PTPN11;PIK3CA;IGF1R;CSNK2A1;PTPN11;RAF1;PIK3CG;SHC1;MAP2K1;SHC1
BIOCARTA_RACCYCD_PATHWAY	12	18	3.6	0.0556987	0.00744296	CDK2;MAPK3;IKBKG;CCNE1;AKT1;PIK3CA;RAC1;MAPK1;AKT1;RHOA;RAF1;NFKB1;IKBKB
REACTOME_SIGNALING_BY_FGFR3	20	35	2.4	0.0580546	0.00781734	GALNT3;FGFR3;GRB2;MAPK3;FGF5;SRC;FGF8;CBL;PTPN11;PIK3CA;SRC;PPP2R1A;MKNK1;MAPK1;PTPN11;RPS27A;BRAF;SHC1;UBB;UBC;FGF18;GAB1;SHC1
BILANGES_SERUM_SENSITIVE_GENES	20	35	2.4	0.0580546	0.00781734	DNM1;NAP1L1;CS;AHCY;GABBR1;PENK;DDX6;NAA10;KHSRP;BLVRB;ACBD6;ACBD6;TOMM20;ASL;CDC37;IGBP1;IL3RA;MYL3;ZFYVE27;GSTA1;OLA1
REACTOME_SIGNALING_BY_ERBB2	24	44	2.2	0.0601413	0.00815259	PRKCA;AKT3;MATK;GRB2;STUB1;SRC;ERBB2;STUB1;AKT1;AKT2;FYN;PIK3CA;USP8;SRC;AKT1;RHOA;MEMO1;RPS27A;EGF;CDC37;SHC1;UBB;UBC;GAB1;SHC1;BTC;NRG3;DIAPH1
TAKAO_RESPONSE_TO_UVB_RADIATION_UP	24	44	2.2	0.0601413	0.00815259	SOD1;H2AZ1;NAP1L1;ARF5;FTH1;RHOA;PRDX3;EEF1D;COX5A;MANF;HNRNPA2B1;TPP1;CDC37;SPINT2;UBB;GRN;UBC;TCP1;MSN;CDH8;RPS25;SRI;PPIB;FUBP1
GRAHAM_NORMAL_QUIESCENT_VS_NORMAL_DIVIDING_UP	19	33	2.4	0.0620375	0.0084814	H2BC21;H2BC21;TNFSF10;CXCL10;FTH1;CXCL3;PTGS2;ALOX5;CXCL2;FXR1;CXCL13;CXCL13;TFPI;PCDH9;CXCL2;CXCL6;IL18R1;IL18R1;CXCL3;CXCL11;IL1B;AREG;ALDH1A1;INHBA
REACTOME_GENE_AND_PROTEIN_EXPRESSION_BY_JAK_STAT_SIGNALING_AFTER_INTERLEUKIN_12_STIMULATION	19	33	2.4	0.0620375	0.0084814	SOD1;LCP1;CAPZA1;CA1;LCP1;LMNB1;HNRNPDL;SNRPA1;CDC42;PPIA;CNN2;HNRNPA2B1;MIF;ARF1;MIF;TCP1;HNRNPF;RALA;MSN;PSME2;ANXA2
BIOCARTA_NFAT_PATHWAY	19	33	2.4	0.0620375	0.0084814	NPPA;EDN1;PRKAR2B;MAPK8;MAPK3;RPS6KB1;AGT;AKT1;GSK3B;PIK3CA;PPP3CA;GSK3B;MAPK1;AKT1;RAF1;CREBBP;F2;PIK3CG;PRKAR1A;MAP2K1;MAPK14
WP_VITAMIN_B12_METABOLISM	23	42	2.2	0.0646636	0.00894018	SOD1;MPO;SAA1;PLG;SAA2;SERPINA3;INSR;TCN2;ALB;SHMT2;APOA1;SAA1;MCEE;NFKB1;CRP;CCL5;F2;PLAT;MMAB;IL1B;CBLIF;IL6;CCL5;SERPINE1;TCN1
NGUYEN_NOTCH1_TARGETS_DN	23	42	2.2	0.0646636	0.00894018	COL11A2;PPIF;PPIF;CLIC1;PTGS2;IGF1R;TARS1;BRD2;ELL2;USP22;EPHA4;EPHA4;CCN1;CADM1;SERPINH1;F3;GARS1;EEF1A1;RPE;IL1R1;BASP1;EEF1A1;HTRA2;PSMB9;SRPK2;MTHFD2
WORSCHECH_TUMOR_REJECTION_UP	23	42	2.2	0.0646636	0.00894018	TCL1B;MX1;STAT6;IRF6;CXCL3;CCL22;IFI16;CXCL2;CCL22;IL7R;CXCL2;CCL23;LCK;CCL5;CXCL3;GZMB;CCL1;CXCL11;IL2RG;IL1B;IL1RAP;IFI16;TNFRSF1B;IL1RAP;IL5;CCL8;TNFRSF1B;IL17RB;CCL5;TLR4
KEGG_GLIOMA	23	42	2.2	0.0646636	0.00894018	SHC4;PRKCA;AKT3;PRKCB;GRB2;MAPK3;AKT1;AKT2;PIK3CA;IGF1R;PLCG2;MAPK1;AKT1;RAF1;ARAF;CAMK2D;EGF;CAMK2B;PTEN;BRAF;PIK3CG;SHC1;MAP2K1;SHC1;MAP2K2
LI_LUNG_CANCER	18	31	2.5	0.0660593	0.0091841	PGK1;CCNE1;YWHAZ;HSPB1;LGALS1;RAC1;EIF5A;RHOA;CDC42;GSTM4;NFKB1;GSTP1;EEF1G;MMP7;IGFBP3;ALDH1A1;HP;FGR
BROWNE_INTERFERON_RESPONSIVE_GENES	18	31	2.5	0.0660593	0.0091841	ISG15;ISG15;TNFSF10;MX1;WARS1;IL15RA;OAS1;CXCL10;GBP1;RABGAP1L;PML;GCH1;IL15;APOBEC3G;TYMP;IFIT3;CCL8;PSMB9;GMPR
BASSO_HAIRY_CELL_LEUKEMIA_UP	22	40	2.2	0.0696609	0.00980041	HPGDS;RRAS;PLXNC1;RAB13;FGFR1;SMPDL3A;AIF1;SLITRK5;TIMP1;DAPK1;ENG;TIMP1;S100A13;IL18;GABARAPL2;IL3RA;IL1R1;IGFBP3;IL1R2;TIMP4;B2M;PLOD2;TNFRSF1A
REACTOME_AMYLOID_FIBER_FORMATION	22	40	2.2	0.0696609	0.00980041	H2BU1;H2BC21;H2BC12;H2BC21;NPPA;H2AZ1;SAA1;APCS;FURIN;GGA1;H3C1;GGA3;APOA1;SAA1;GSN;GSN;RPS27A;IAPP;UBB;SNCA;UBC;SNCA;MFGE8;B2M;CST3;APOA4
TIEN_INTESTINE_PROBIOTICS_2HR_DN	22	40	2.2	0.0696609	0.00980041	CRIM1;CALD1;INPP5F;DAB2;ETNK1;KLC1;UBE2D1;PLXNA1;CIRBP;PTGS2;C9;C9;UFM1;SAMM50;PPFIA1;GABARAPL1;EED;FUBP3;RAF1;CADM1;TIAL1;PDHX;RECQL
MCBRYAN_PUBERTAL_BREAST_6_7WK_DN	22	40	2.2	0.0696609	0.00980041	SFRP1;SFRP1;BPGM;SERPINA3;PLA2G7;TIMP1;KIF22;TIMP1;DUSP6;F3;APOD;SLPI;CNN1;TNC;CAP1;UBE2C;IFIT3;AREG;BCL6;CA4;IGFBP2;TNC;IGFBP2;TNC;RPS10;IGFBP2;PLOD2;IGFBP2;TNC;FBLIM1
PID_IL6_7_PATHWAY	22	40	2.2	0.0696609	0.00980041	JAK2;MAP2K4;GRB2;MAP2K6;PTPN11;AKT1;VAV1;PIK3CA;MCL1;RAC1;BCL2L1;AKT1;STAT3;TIMP1;LBP;STAT3;PTPN11;LMO4;TIMP1;CRP;A2M;MITF;TYK2;MAPK14;GAB1;MCL1;IL6
BURTON_ADIPOGENESIS_7	17	29	2.6	0.0697189	0.00992143	DNM1;TAGLN2;SERPINE2;RBP1;TPM4;ACTN1;TINAGL1;TPM4;HMGA2;TAGLN2;TIMP1;TIMP1;NONO;BAG6;S100A6;DLK1;TIMP2;DLK1;PNP;PNP;VCAM1;PLXNB2
KEGG_ARACHIDONIC_ACID_METABOLISM	17	29	2.6	0.0697189	0.00992143	PLA2G5;PLA2G10;PLA2G2C;HPGDS;PLA2G12A;PTGS2;PLA2G2A;GPX1;ALOX5;ALOX15B;PLA2G4A;PTGES2;GPX7;CBR3;PLA2G12B;PLA2G1B;PTGDS
REACTOME_ACTIVATION_OF_MATRIX_METALLOPROTEINASES	17	29	2.6	0.0697189	0.00992143	MMP17;CTSG;MMP16;PLG;CMA1;FURIN;TPSAB1;TIMP1;ELANE;TIMP1;MMP9;MMP2;TIMP2;MMP7;PRSS1;PRSS2;MMP8;CTRB1
WP_OVERLAP_BETWEEN_SIGNAL_TRANSDUCTION_PATHWAYS_CONTRIBUTING_TO_LMNA_LAMINOPATHIES	17	29	2.6	0.0697189	0.00992143	TGFB1;NAP1L1;BMP2;CTNNB1;HES5;TGFB1;GSK3B;SMAD2;CEBPA;SMAD3;GSK3B;HMGA2;TGFB2;TMPO;FNTA;CREBBP;CTNNB1;HES1;SPP1;AGO2
WP_NEURAL_CREST_CELL_MIGRATION_IN_CANCER	17	29	2.6	0.0697189	0.00992143	NTRK2;AKT3;AKT1;AKT2;PIK3CA;BDNF;PAK4;PAK6;RAC1;AKT1;STAT3;RHOA;STAT3;ARF1;PIK3CG;MMP9;MMP2;MMP8;NGFR;BDNF
PID_SYNDECAN_1_PATHWAY	17	29	2.6	0.0697189	0.00992143	BSG;TGFB1;COL11A2;PRKACA;MAPK3;HGF;TGFB1;HPSE;COL13A1;MAPK1;CCL5;MMP9;COL6A1;MMP7;COL2A1;COL15A1;PPIB;CCL5;COL6A3
SUZUKI_RESPONSE_TO_TSA	6	7	10.8	0.0697757	0.0101179	ARFIP2;MBNL1;PDIA5;TRADD;RAD23B;FABP4;FABP4
REACTOME_PTK6_REGULATES_RTKS_AND_THEIR_EFFECTORS_AKT1_AND_DOK1	6	7	10.8	0.0697757	0.0101179	CBL;AKT1;DOK1;AKT1;RPS27A;UBB;UBC
REACTOME_TICAM1_DEPENDENT_ACTIVATION_OF_IRF3_IRF7	6	7	10.8	0.0697757	0.0101179	TBK1;TANK;IRF3;RPS27A;UBB;UBC
REACTOME_ACTIVATED_NTRK2_SIGNALS_THROUGH_PI3K	6	7	10.8	0.0697757	0.0101179	NTRK2;GRB2;PIK3CA;BDNF;NTF4;GAB1;BDNF
REACTOME_TRANSLATION_OF_REPLICASE_AND_ASSEMBLY_OF_THE_REPLICATION_TRANSCRIPTION_COMPLEX	6	7	10.8	0.0697757	0.0101179	CHMP2B;MAP1LC3B;CHMP2A;CHMP6;PIK3C3;CHMP4A
REACTOME_MATURATION_OF_SARS_COV_2_NUCLEOPROTEIN	6	7	10.8	0.0697757	0.0101179	GSK3A;GSK3B;GSK3B;UBE2I;SRPK1;PRMT1;SRPK2
WP_ASPIRIN_AND_MIRNAS	6	7	10.8	0.0697757	0.0101179	PTGS2;VEGFA;VEGFA;NFKB1;PDK1;MVD;PPARA;VEGFA
WP_PENTOSE_PHOSPHATE_METABOLISM	6	7	10.8	0.0697757	0.0101179	RPIA;TKT;G6PD;RPE;PGLS;PGD
BIOCARTA_MYOSIN_PATHWAY	6	7	10.8	0.0697757	0.0101179	PRKCA;PRKCB;PLCB1;ARHGAP5;ARHGEF1;GNAQ
PID_S1P_S1P4_PATHWAY	6	7	10.8	0.0697757	0.0101179	MAPK3;GNAI3;GNAI1;MAPK1;RHOA;CDC42
BURTON_ADIPOGENESIS_9	25	47	2.1	0.0724437	0.0105688	CSF1;ROCK2;ANXA11;DNM1;CSRP1;CYTH3;CLIC1;PTGS2;SIRT2;CCL7;DOK1;NME4;CCL7;CXCL2;EIF4B;CCN1;CSF1;DPP7;PLA2G4A;CXCL2;SIRT2;CCL23;F3;PLAT;LGALS9;GRN;SPP1;SPART;VCAM1
ROYLANCE_BREAST_CANCER_16Q_COPY_NUMBER_UP	16	27	2.6	0.0724437	0.0106864	IL4;CMIP;CCL22;CETP;PLCG2;CCL22;GOT2;GOT2;CBLN1;CSNK2A2;CNOT1;CDH8;FTO;RBL2;ZNF276;CCL17;POLR2C;COQ9
REACTOME_NEGATIVE_REGULATION_OF_FGFR4_SIGNALING	16	27	2.6	0.0724437	0.0106864	GRB2;MAPK3;KLB;SRC;FGF8;CBL;PTPN11;SRC;PPP2R1A;MKNK1;MAPK1;PTPN11;RPS27A;BRAF;UBB;UBC;FGF19;FGF19;FGF18
REACTOME_ACTIVATION_OF_THE_MRNA_UPON_BINDING_OF_THE_CAP_BINDING_COMPLEX_AND_EIFS_AND_SUBSEQUENT_BINDING_TO_43S	16	27	2.6	0.0724437	0.0106864	EIF4E;EIF4A1;EIF3M;EIF2S1;EIF4H;EIF4A2;EIF4A2;EIF2S2;EIF4B;RPS12;EIF3B;EIF3G;RPS27A;EIF3J;EIF4G1;RPS25;RPS10
WP_NEURAL_CREST_CELL_MIGRATION_DURING_DEVELOPMENT	16	27	2.6	0.0724437	0.0106864	AKT3;AKT1;AKT2;PIK3CA;BDNF;PAK4;PAK6;RAC1;AKT1;STAT3;RHOA;STAT3;ARF1;PIK3CG;MMP9;MMP2;MMP8;NGFR;BDNF
WP_P38_MAPK_SIGNALING_PATHWAY	16	27	2.6	0.0724437	0.0106864	MAP2K4;GRB2;MAP2K6;HSPB1;MAPKAPK2;TRADD;RAC1;MKNK1;TGFB2;RIPK1;CDC42;PLA2G4A;MAX;SHC1;MAPK14;SHC1;MAPKAPK5
APRELIKOVA_BRCA1_TARGETS	16	27	2.6	0.0724437	0.0106864	VIM;WARS1;ROCK2;FGFBP1;NEFL;EIF2S1;NUMB;FGFR1;HMGA2;GOT2;PDIA3;GOT2;DDX1;ARF1;PDIA3;FGFBP1;SARS1;SFN;ANXA5
PID_AR_PATHWAY	16	27	2.6	0.0724437	0.0106864	CTDSP1;PTK2B;CTNNB1;AKT1;KDM4C;PA2G4;RPS6KA3;UBE2I;AKT1;XRCC6;PAWR;GSN;GSN;PIAS4;MED1;KLK3;CTNNB1;UBE3A;TCF4;KLK3
GRABARCZYK_BCL11B_TARGETS_UP	21	38	2.2	0.0726091	0.0107388	TNFSF10;ADCYAP1;ID2;PRKAR2B;NEK7;SCARB2;AASDHPPT;GMFB;LGALS1;TRUB1;RPS6KA3;TIMP1;TIMP1;MSI2;USO1;APOBEC3G;PDCD6IP;TOR1AIP2;ANXA2;RECQL;ITGB7;RDX
MORI_PLASMA_CELL_UP	15	25	2.7	0.0766373	0.0114675	BPGM;DERL1;SSR2;UBXN4;QPCTL;IP6K1;DDOST;CD28;MANF;NANS;TESC;CTSB;NTAQ1;HTATIP2;RPN1
YAO_TEMPORAL_RESPONSE_TO_PROGESTERONE_CLUSTER_2	15	25	2.7	0.0766373	0.0114675	CDON;None;CCL27;TNXB;MMP12;SRSF7;RBM39;BCL2;PLA2R1;PKLR;RAB14;DTD2;PKLR;MYLPF;FUBP1;HGD
WP_BDNFTRKB_SIGNALING	15	25	2.7	0.0766373	0.0114675	NTRK2;GRB2;RPS6KB1;AKT1;HOMER1;BDNF;MKNK1;MAPK1;AKT1;DLG4;ARC;BRAF;PIK3CG;SHC1;MAP2K1;GAB1;SHC1;BDNF
TIEN_INTESTINE_PROBIOTICS_6HR_UP	15	25	2.7	0.0766373	0.0114675	NAP1L1;FTL;PGK1;HSPA1A;HSPA1A;PTP4A2;HSPA1A;RAB2A;EIF5A;PPIA;HSPA1A;HSPA1A;RAB2A;TPT1;HSPA1B;HSPA1A;HSPA1A;HSPA1A;HSPA8;UBC;EEF1G;EEF1A1;EEF1A1;B2M;RPL5
DELPUECH_FOXO3_TARGETS_DN	15	25	2.7	0.0766373	0.0114675	PRC1;ZWINT;AARS1;SHMT2;DTYMK;FOXM1;KIF22;HAX1;VEGFA;VEGFA;TIAL1;UBE2C;EXOSC8;AREG;VEGFA;EFNB2;MTHFD2
PID_ECADHERIN_STABILIZATION_PATHWAY	15	25	2.7	0.0766373	0.0114675	VASP;CTNNB1;HGF;ENAH;ZYX;ACTN1;IGF1R;STX4;CTNNA1;RHOA;CTNNA1;MGAT3;EGF;CTNNB1;VCL;DIAPH1;EFNA1
WP_TCELL_ANTIGEN_RECEPTOR_TCR_PATHWAY_DURING_STAPHYLOCOCCUS_AUREUS_INFECTION	24	45	2.1	0.0773883	0.0116396	CD4;RRAS;IL4;GRB2;MAPK3;IKBKG;CBL;AKT1;MAPK9;PTPN6;GSK3B;FYN;PIK3CA;GSK3B;AKT1;RAF1;PRKCQ;CD28;NFKB1;LCK;PDK1;MAP2K1;MAPK9;IL5;IKBKB;MAP2K2;AHSA1
GU_PDEF_TARGETS_UP	24	45	2.1	0.0773883	0.0116396	TGFB1;VIM;PRKCA;SERPINB3;ITGA5;BMP2;RAC2;TGFB1;MAPK9;MAPKAPK2;SMAD2;SMAD4;SMAD3;COL13A1;SMAD1;VEGFA;VEGFA;SERPINA1;PIK3C3;TNC;MAPK9;COL6A1;FN1;VEGFA;RAC3;TNC;TNC;TCF4;TNC;SERPINE1;COL6A3
HOEBEKE_LYMPHOID_STEM_CELL_UP	20	36	2.3	0.0775962	0.0117606	BTK;PRKCB;RBM39;ARHGAP45;ITIH4;EIF4A1;TNFAIP3;ARHGAP25;BTK;SETBP1;NACA;NUDT3;RAB14;EVL;RAB31;SPON1;LPIN1;BCL6;BASP1;TCF4;ADGRE2
REACTOME_SIGNALING_BY_BRAF_AND_RAF1_FUSIONS	20	36	2.3	0.0775962	0.0117606	JAK2;ITGA2B;CSK;ITGA2B;MAPK3;SRC;ARRB1;SRC;MAPK1;FXR1;RAF1;ARAF;ITGA2B;VWF;CAMK2D;CAMK2B;YWHAB;MARK3;BRAF;MAP2K1;YWHAB;FN1;MAP2K2;VCL
REACTOME_EUKARYOTIC_TRANSLATION_INITIATION	20	36	2.3	0.0775962	0.0117606	EIF4E;EIF4A1;EIF2B1;EIF3M;EIF2S1;EIF4H;EIF4A2;EIF4A2;EIF2S2;EIF4B;RPS12;EIF3B;EIF3G;RPS27A;EIF3J;EIF4G1;RPS25;RPS10;RPL26L1;RPL5;EIF5
WP_TGFBETA_RECEPTOR_SIGNALING	20	36	2.3	0.0775962	0.0117606	TGFB1;SMAD5;MAPK3;CTNNB1;TGFB1;MAPK9;BMP4;SMAD2;SMAD4;SMAD3;LEFTY2;BMP4;STAT3;STAT3;SMAD1;ENG;NFKB1;CREBBP;EGF;SKIL;CTNNB1;LEFTY2;MAPK9;SPP1;SERPINE1;INHBA
BIOCARTA_HIVNEF_PATHWAY	20	36	2.3	0.0775962	0.0117606	MAPK8;RASA1;BCL2;CRADD;CASP3;LMNB1;TRADD;LMNB2;APAF1;ARHGDIB;RIPK1;GSN;GSN;TRAF1;BAG4;NFKB1;BIRC2;TNFRSF1B;BID;TNFRSF1B;CFLAR;TNFRSF1A
PID_PI3KCI_PATHWAY	20	36	2.3	0.0775962	0.0117606	BLNK;DAPP1;LYN;BTK;ARF5;LYN;SYK;PDPK1;SRC;CYTH3;SYK;FYN;PIK3CA;PLCG2;SRC;BTK;RAC1;RHOA;LCK;PTEN;ARF1;PIK3CG;FOXO3;FGR
REACTOME_OVARIAN_TUMOR_DOMAIN_PROTEASES	14	23	2.8	0.0798927	0.0122473	IKBKG;UBE2D1;TNFAIP3;VCPIP1;VCP;RHOA;RIPK1;OTUD7B;RPS27A;ZRANB1;PTEN;UBB;UBC;DDX58
HASLINGER_B_CLL_WITH_17P13_DELETION	7	9	6.3	0.0810174	0.0127009	PRDX4;MAPRE3;EIF4A1;SCP2;SCP2;ASMTL;HNRNPDL;GABARAP
XU_RESPONSE_TO_TRETINOIN_UP	7	9	6.3	0.0810174	0.0127009	PTK2B;PIM1;WAS;AGO1;DEFA1;PSMB9;PGD
XU_RESPONSE_TO_TRETINOIN_DN	7	9	6.3	0.0810174	0.0127009	TPM4;TPM4;PPP3CA;FUBP3;ECI2;GARS1;UBE3A;ANXA2
WANG_RECURRENT_LIVER_CANCER_UP	7	9	6.3	0.0810174	0.0127009	PTPN11;CUL4B;DNAJC10;SMURF2;PTPN11;RBM41;SH3GLB2;RACGAP1
HAHTOLA_CTCL_PATHOGENESIS	7	9	6.3	0.0810174	0.0127009	XCL1;KIR3DL2;S100P;IL7R;LILRA5;CCL5;GZMB;CCL5
BIOCARTA_PLC_PATHWAY	7	9	6.3	0.0810174	0.0127009	PRKCA;PRKCB;AKT1;PLCB1;VAV1;PIK3CA;AKT1;PIK3CG
REACTOME_ACYL_CHAIN_REMODELLING_OF_PG	7	9	6.3	0.0810174	0.0127009	PLA2G5;PLA2G10;PLA2G12A;PLA2G2A;PLA2R1;PLA2G4A;PLA2G1B
REACTOME_PRC2_METHYLATES_HISTONES_AND_DNA	7	9	6.3	0.0810174	0.0127009	H2BU1;H2BC21;H2BC12;H2BC21;H2AZ1;RBBP4;H3C1;EED
REACTOME_G_BETA_GAMMA_SIGNALLING_THROUGH_PI3KGAMMA	7	9	6.3	0.0810174	0.0127009	AKT3;PDPK1;AKT1;AKT2;AKT1;RHOA;PIK3CG;GNGT2
REACTOME_SIGNAL_AMPLIFICATION	7	9	6.3	0.0810174	0.0127009	GNAI3;SRC;SRC;GNAI1;PLA2G4A;MAPK14;GNAQ;GNGT2
REACTOME_ERCC6_CSB_AND_EHMT2_G9A_POSITIVELY_REGULATE_RRNA_EXPRESSION	7	9	6.3	0.0810174	0.0127009	H2BU1;H2BC21;H2BC12;H2BC21;H2AZ1;RBBP4;H3C1;HDAC2
REACTOME_DEADENYLATION_OF_MRNA	7	9	6.3	0.0810174	0.0127009	EIF4E;EIF4A1;EIF4A2;EIF4A2;CNOT9;EIF4B;CNOT1;EIF4G1
REACTOME_THROMBIN_SIGNALLING_THROUGH_PROTEINASE_ACTIVATED_RECEPTORS_PARS	7	9	6.3	0.0810174	0.0127009	MAPK3;SRC;ARRB1;SRC;MAPK1;F2;GNAQ;GNGT2
WP_FBXL10_ENHANCEMENT_OF_MAPERK_SIGNALING_IN_DIFFUSE_LARGE_BCELL_LYMPHOMA	7	9	6.3	0.0810174	0.0127009	H2AZ1;MAPK3;H3C1;MAPK1;EED;DUSP6;BCL6
WP_MAMMARY_GLAND_DEVELOPMENT_PATHWAY_PUBERTY_STAGE_2_OF_4	7	9	6.3	0.0810174	0.0127009	VIM;ERBB2;TIMP1;TIMP1;EGF;STAT5A;AREG;FN1
NADLER_OBESITY_UP	23	43	2.1	0.081575	0.0128198	FLNA;CSF1R;TPM4;CSF1R;POSTN;PFN1;ATP6V1C1;TPM4;NEDD8;POSTN;LBP;LGMN;CCL23;FLNA;PLTP;MIF;GRN;PLD3;MIF;LGMN;CAPG;CTSB;CD68;MFGE8;BASP1;HCLS1;CTSA;LEP;LRP1
WP_MELANOMA	19	34	2.3	0.0817011	0.0128712	KIT;AKT3;GRB2;MAPK3;AKT1;AKT2;PIK3CA;RAC1;MAPK1;AKT1;BAD;LAMTOR3;RAF1;ARAF;MITF;PTEN;BRAF;MAP2K1;MAP2K2;VCL
DIRMEIER_LMP1_RESPONSE_LATE_UP	19	34	2.3	0.0817011	0.0128712	LYN;LYN;VOPP1;PLEK;TRIP10;CCL22;CCL22;TRAF1;HMOX1;NFKB1;HSD17B10;STAT5A;GARS1;CARS1;FASN;TNFRSF1B;ADGRE5;TNFRSF1B;STIP1;CFLAR;MTHFD2;SERPINB9
FRASOR_TAMOXIFEN_RESPONSE_UP	13	21	2.9	0.0820125	0.0129993	DAB2;ETNK1;CLIC3;KLC1;IER3;YWHAZ;LASP1;CPM;PCYOX1;SERPINA1;PGRMC1;EFNB2;RDX
MARIADASON_REGULATED_BY_HISTONE_ACETYLATION_UP	13	21	2.9	0.0820125	0.0129993	ISG15;ISG15;ID2;PDPK1;H1-2;MCAM;DLX4;MBD4;TGM2;BCL2L1;CHI3L1;ESAM;ADGRB2;HGD
REACTOME_ACTIVATION_OF_BH3_ONLY_PROTEINS	13	21	2.9	0.0820125	0.0129993	AKT3;YWHAH;MAPK8;BCL2;YWHAZ;AKT1;YWHAG;AKT2;AKT1;BAD;YWHAG;YWHAH;YWHAB;DYNLL2;YWHAB;BID;SFN
DEN_INTERACT_WITH_LCA5	13	21	2.9	0.0820125	0.0129993	NAP1L1;YWHAH;HSPA1A;YWHAZ;HSPA1A;YWHAG;HSPA1A;CSNK2A1;NCL;YWHAG;HSPA1A;HSPA1A;YWHAH;HSPA1B;HSPA1A;HSPA1A;CSNK2A2;YWHAB;HSPA1A;HSPA8;DYNLL2;YWHAB;HSPA5;HSPA1L
JOHNSTONE_PARVB_TARGETS_1_DN	12	19	3.1	0.0850116	0.0136838	PTN;HSPA1A;HSPA1A;UBE2K;ACOT13;UBA6;ADH5;PPP3CA;HSPA1A;HSPA1A;HSPA1A;HSPA1B;HSPA1A;HSPA1A;HSPA1A;TNC;CTSB;STC1;TNC;TNC;RBMS1;TNC;COL6A3
REACTOME_RHOBTB_GTPASE_CYCLE	12	19	3.1	0.0850116	0.0136838	VIM;ROCK2;PDE5A;TXNL1;PDE5A;TMOD3;ACTN1;CCT7;TRA2B;MSI2;TWF1;CDC37;CUL3
WP_IL1_AND_MEGAKARYOCYTES_IN_OBESITY	12	19	3.1	0.0850116	0.0136838	PIK3CA;PLA2G7;TIMP1;TIMP1;NFKB1;F2;MMP9;IL18;S100A9;IL1B;TIMP2;IL1R1;FCER1A
YANAGIHARA_ESX1_TARGETS	8	11	4.8	0.0850116	0.0140559	DAB2;MAP4K5;TGFB2;INPP4B;GNS;IL18;BMP5;HMGCS1
LOPES_METHYLATED_IN_COLON_CANCER_UP	8	11	4.8	0.0850116	0.0140559	SFRP1;SFRP1;PENK;MGMT;GDNF;PYCARD;OPCML;SCGB3A1;RARRES1
CLIMENT_BREAST_CANCER_COPY_NUMBER_UP	8	11	4.8	0.0850116	0.0140559	FGF3;JAG1;RBBP5;ERBB2;FGFR1;EBAG9;STK3;BCL6
KAPOSI_LIVER_CANCER_MET_UP	8	11	4.8	0.0850116	0.0140559	ITGAV;ARPC1B;MAPK3;NCK2;KPNB1;ITGAV;ITGAV;ITGAV;CAP1;DENR;ANXA5
FIGUEROA_AML_METHYLATION_CLUSTER_6_DN	8	11	4.8	0.0850116	0.0140559	PLEK;NLRP10;CCL1;PLD3;IL2RG;DEFA3;DEFA1;UNC5D
REACTOME_ACYL_CHAIN_REMODELLING_OF_PI	8	11	4.8	0.0850116	0.0140559	PLA2G5;PLA2G10;PLA2G12A;PLA2G2A;PLA2R1;PLA2G4A;PLBD1;PLA2G1B
REACTOME_APC_C_CDC20_MEDIATED_DEGRADATION_OF_CYCLIN_B	8	11	4.8	0.0850116	0.0140559	ANAPC7;ANAPC10;UBE2D1;RPS27A;UBB;UBC;UBE2C;UBE2S
REACTOME_PECAM1_INTERACTIONS	8	11	4.8	0.0850116	0.0140559	ITGAV;LYN;LYN;SRC;PTPN11;PTPN6;FYN;PECAM1;SRC;ITGAV;ITGAV;PTPN11;ITGAV;LCK
REACTOME_TGF_BETA_RECEPTOR_SIGNALING_IN_EMT_EPITHELIAL_TO_MESENCHYMAL_TRANSITION	8	11	4.8	0.0850116	0.0140559	PRKCZ;TGFB1;SMURF1;TGFB1;F11R;RHOA;RPS27A;UBB;UBC
REACTOME_PLATELET_SENSITIZATION_BY_LDL	8	11	4.8	0.0850116	0.0140559	PPP2R5A;PTPN11;PTPN6;PECAM1;PPP2R1A;PLA2G4A;PTPN11;MAPK14;FGR
REACTOME_REGULATION_OF_LOCALIZATION_OF_FOXO_TRANSCRIPTION_FACTORS	8	11	4.8	0.0850116	0.0140559	AKT3;YWHAZ;AKT1;YWHAG;AKT2;AKT1;YWHAG;YWHAB;YWHAB;FOXO3;SFN
WP_PROGERIAASSOCIATED_LIPODYSTROPHY	8	11	4.8	0.0850116	0.0140559	TGFB1;TGFB1;SMAD2;SMAD4;SMAD3;LMNB1;LMNB2;FNTA;RECQL
WP_STING_PATHWAY_IN_KAWASAKILIKE_DISEASE_AND_COVID19	8	11	4.8	0.0850116	0.0140559	TBK1;IFNB1;IKBKG;IRF3;NFKB1;F3;IL1B;IKBKB
SOUCEK_MYC_TARGETS	8	11	4.8	0.0850116	0.0140559	CXCL3;CCL7;CCL7;CXCL2;CXCL13;CXCL13;CXCL2;CCL23;CXCL6;CCL5;LILRB5;CXCL3;CCL5
BIOCARTA_RELA_PATHWAY	8	11	4.8	0.0850116	0.0140559	IKBKG;TRADD;RIPK1;NFKB1;CREBBP;TNFRSF1B;TNFRSF1B;IKBKB;TNFRSF1A
PID_ARF6_DOWNSTREAM_PATHWAY	8	11	4.8	0.0850116	0.0140559	RAB11A;RAB11FIP3;MAPK3;RAC1;MAPK1;RHOA;ARF1;NME1
JIANG_HYPOXIA_CANCER	18	32	2.3	0.0850116	0.0140748	ISG15;ISG15;ARPC3;RPN2;SH3BGRL3;UFM1;UBE2I;IST1;ATP1B1;TGM2;UBL7;ARPC5;GOT2;HAX1;DHFR;MRTO4;GOT2;PPME1;MANSC1;FN1
REACTOME_CYTOSOLIC_SENSORS_OF_PATHOGEN_ASSOCIATED_DNA	18	32	2.3	0.0850116	0.0140748	ZBP1;STAT6;TBK1;CTNNB1;IKBKG;POLR2K;IRF3;IFI16;XRCC6;RIPK1;NFKB1;CREBBP;RPS27A;POLR1C;POLR2E;CTNNB1;UBB;UBC;IFI16;IKBKB
REACTOME_FLT3_SIGNALING	18	32	2.3	0.0850116	0.0140748	CSK;AKT3;GRB2;SYK;CBL;PTPN11;AKT1;SYK;AKT2;ABL2;FYN;PIK3CA;AKT1;GRB10;PTPN11;RPS27A;LCK;STAT5A;UBB;UBC;FOXO3
WP_METABOLIC_REPROGRAMMING_IN_COLON_CANCER	18	32	2.3	0.0850116	0.0140748	MDH2;MDH2;RPIA;PGK1;SHMT2;GLS;GOT2;ENO1;GOT2;PKM;TKT;G6PD;FASN;PSPH;GLUD1;PAICS;FH;PSAT1;PGD;ALDOB
KEGG_CYTOSOLIC_DNA_SENSING_PATHWAY	18	32	2.3	0.0850116	0.0140748	ZBP1;TBK1;CXCL10;IFNB1;IKBKG;IFNA4;IRF3;PYCARD;RIPK1;NFKB1;CCL5;POLR1C;IL18;IL1B;DDX58;IFNA7;IKBKB;IL6;CCL5
WP_LUNG_FIBROSIS	22	41	2.1	0.0850116	0.0141206	TGFB1;EDN1;IL4;CMA1;HGF;TGFB1;CXCL2;TIMP1;CXCL2;HMOX1;PTX3;TIMP1;BMP7;SERPINA1;EGF;SKIL;CCL5;MMP9;MMP2;IL1B;SPP1;IL12B;IL5;IL6;CCL5;CSF3
JAZAERI_BREAST_CANCER_BRCA1_VS_BRCA2_UP	11	17	3.3	0.0850116	0.0142421	HARS1;MAPRE1;PPP2R5A;RBBP4;AKT1;MAPRE1;AKT1;BAD;MPI;IL18R1;IL18R1;IL1B;IL17RA;MAP2K3
KEGG_ETHER_LIPID_METABOLISM	11	17	3.3	0.0850116	0.0142421	PLA2G5;PLA2G10;PLA2G2C;PAFAH2;PLA2G12A;PLA2G2A;PLA2G7;PLA2G4A;ENPP2;PLA2G12B;PLA2G1B
REACTOME_FORMATION_OF_THE_BETA_CATENIN_TCF_TRANSACTIVATING_COMPLEX	11	17	3.3	0.0850116	0.0142421	H2BU1;H2BC21;H2BC12;H2BC21;H2AZ1;RUVBL1;KAT5;CTNNB1;RBBP5;H3C1;CREBBP;CTNNB1;TCF4
WP_EXTRACELLULAR_VESICLES_IN_THE_CROSSTALK_OF_CARDIAC_CELLS	11	17	3.3	0.0850116	0.0142421	SOD1;HSPB1;PDLIM5;STAT3;STAT3;EGF;PTEN;MMP9;SPP1;CD81;IL6;TLR4
WP_RELATIONSHIP_BETWEEN_INFLAMMATION_COX2_AND_EGFR	11	17	3.3	0.0850116	0.0142421	AKT3;MAPK3;SRC;PTGS2;AKT1;AKT2;PIK3CA;SRC;MAPK1;AKT1;PTGES2;BRAF;PIK3CG
TOMLINS_PROSTATE_CANCER_DN	11	17	3.3	0.0850116	0.0142421	CAVIN1;MEIS2;GSN;GSN;CYLD;SMTN;TPM2;CNN1;GATM;LPIN1;SPART;VCL
URS_ADIPOCYTE_DIFFERENTIATION_DN	11	17	3.3	0.0850116	0.0142421	LUM;DCN;CEBPA;PPP2R1A;PSG9;MED1;MMP9;COL6A1;FN1;COL6A3;PTGDS
PID_P38_MK2_PATHWAY	11	17	3.3	0.0850116	0.0142421	YWHAH;YWHAZ;YWHAG;HSPB1;MAPKAPK2;MAPKAPK3;YWHAG;RAF1;YWHAH;YWHAB;YWHAB;MAPK14;LSP1;SFN
OHM_METHYLATED_IN_ADULT_CANCERS	10	15	3.6	0.0850116	0.0145871	SFRP5;SFRP1;SFRP1;MGMT;RBP1;PYCARD;SFRP4;DAPK1;SFRP4;GSTP1;FHIT;TIMP3
HOFFMANN_PRE_BI_TO_LARGE_PRE_BII_LYMPHOCYTE_UP	10	15	3.6	0.0850116	0.0145871	RRAS;GAP43;TIRAP;LMO4;LILRB5;GZMB;TAX1BP3;CACNB3;SARS1;KIF23
REACTOME_CTLA4_INHIBITORY_SIGNALING	10	15	3.6	0.0850116	0.0145871	LYN;AKT3;LYN;PPP2R5A;SRC;PTPN11;AKT1;AKT2;FYN;SRC;PPP2R1A;AKT1;PTPN11;LCK
REACTOME_MITOPHAGY	10	15	3.6	0.0850116	0.0145871	SRC;MAP1LC3B;SRC;CSNK2A1;TOMM20;RPS27A;CSNK2A2;UBB;UBC;ATG5;MAP1LC3A
REACTOME_VEGFR2_MEDIATED_VASCULAR_PERMEABILITY	10	15	3.6	0.0850116	0.0145871	AKT3;CTNNB1;PDPK1;CDH5;AKT1;THEM4;AKT2;VAV1;CTNNA1;RAC1;AKT1;CTNNA1;CTNNB1
WP_TGFBETA_SIGNALING_IN_THYROID_CELLS_FOR_EPITHELIALMESENCHYMAL_TRANSITION	10	15	3.6	0.0850116	0.0145871	TGFB1;VIM;MAPK3;TGFB1;AKT1;SMAD2;SMAD4;SMAD3;MAPK1;AKT1;TNC;FN1;TNC;TNC;TNC
WP_TOLLLIKE_RECEPTOR_SIGNALING_RELATED_TO_MYD88	10	15	3.6	0.0850116	0.0145871	TOLLIP;TBK1;IKBKG;IRF3;MAPK1;TIRAP;IRAK4;NFKB1;IKBKB;TLR4
WP_LIPID_METABOLISM_PATHWAY	10	15	3.6	0.0850116	0.0145871	PRKACA;PRKAR2B;AKT3;AKT1;AKT2;PRKAA2;ABHD5;AKT1;ACSS2;PRKAR1A;FASN
BIOCARTA_TOLL_PATHWAY	10	15	3.6	0.0850116	0.0145871	MAP2K4;MAPK8;IKBKG;MAP2K6;NFKB1;PPARA;MAPK14;IKBKB;MAP2K3;PGLYRP1
VERRECCHIA_RESPONSE_TO_TGFB1_C5	9	13	4.1	0.0850116	0.0145893	ILK;ITGA5;CTNNB1;NME4;CTNNA1;CTNNA1;DDR1;CTNNB1;DDR1;MMP2;ARHGAP1;TNFRSF1A
LIU_IL13_MEMORY_MODEL_UP	9	13	4.1	0.0850116	0.0145893	CCL27;RAB4B;MAP3K11;ARRB1;MKNK1;CDC42;CCL26;CCL8;MAP2K2
KEGG_LINOLEIC_ACID_METABOLISM	9	13	4.1	0.0850116	0.0145893	PLA2G5;PLA2G10;PLA2G2C;PLA2G12A;PLA2G2A;PLA2G4A;AKR1B10;PLA2G12B;PLA2G1B
REACTOME_GAB1_SIGNALOSOME	9	13	4.1	0.0850116	0.0145893	CSK;GRB2;SRC;PTPN11;PIK3CA;SRC;PTPN11;EGF;AREG;GAB1;BTC
REACTOME_METALLOPROTEASE_DUBS	9	13	4.1	0.0850116	0.0145893	H2AC1;H2AW;H2AC11;RPS27A;ABRAXAS2;STAMBP;UBB;UBC;MYSM1
REACTOME_BRANCHED_CHAIN_AMINO_ACID_CATABOLISM	9	13	4.1	0.0850116	0.0145893	IVD;ACADSB;ALDH6A1;BCAT2;ECHS1;HIBCH;HSD17B10;DBT;ACAT1
REACTOME_DEFECTS_OF_CONTACT_ACTIVATION_SYSTEM_CAS_AND_KALLIKREIN_KININ_SYSTEM_KKS	9	13	4.1	0.0850116	0.0145893	SERPING1;F8;F9;VWF;F11;GP5;F2;TPST1;GP1BB
OUYANG_PROSTATE_CANCER_PROGRESSION_UP	9	13	4.1	0.0850116	0.0145893	PRKCB;GRB2;SYK;SYK;ARHGAP5;DUSP16;STAT3;TIRAP;STAT3;CDC42;CD81
LU_TUMOR_ENDOTHELIAL_MARKERS_UP	9	13	4.1	0.0850116	0.0145893	ADAM12;HOPX;POSTN;POSTN;HSPA6;PLXDC1;MMP9;TNFRSF21;STC1;EGFL6
BIOCARTA_CHEMICAL_PATHWAY	9	13	4.1	0.0850116	0.0145893	PRKCA;PRKCB;BCL2;CASP3;AKT1;EIF2S1;AKT1;BAD;APAF1;BID
BIOCARTA_HDAC_PATHWAY	9	13	4.1	0.0850116	0.0145893	YWHAH;INSR;MAP2K6;AKT1;PIK3CA;IGF1R;PPP3CA;AKT1;YWHAH;PIK3CG;MAPK14
BIOCARTA_IL7_PATHWAY	9	13	4.1	0.0850116	0.0145893	PTK2B;BCL2;FYN;PIK3CA;IL7R;CREBBP;LCK;STAT5A;PIK3CG
REACTOME_NEGATIVE_REGULATION_OF_FGFR2_SIGNALING	17	30	2.4	0.0885942	0.015375	FGF22;FGF3;GRB2;MAPK3;FGF5;SRC;FGF8;CBL;PTPN11;SRC;PPP2R1A;MKNK1;MAPK1;PTPN11;RPS27A;BRAF;UBB;UBC;FGF18
CASTELLANO_NRAS_TARGETS_UP	17	30	2.4	0.0885942	0.015375	ISG15;ISG15;SERPINE2;PENK;CRABP2;GJA1;ANXA4;ITIH2;ACADM;IFI16;CLEC11A;CLEC11A;LBP;PTX3;IL1RN;PLTP;IFI16;LSP1;B2M;PCBD2
URS_ADIPOCYTE_DIFFERENTIATION_UP	17	30	2.4	0.0885942	0.015375	CTSG;GLUL;INSR;PLEK;AGT;PFKFB3;USP8;ALDH6A1;AMT;MASP1;LBP;LPL;MMP7;MASP1;ADIPOQ;IGFBP2;IGFBP2;FABP4;IGFBP2;DPT;IGFBP2;FABP4
GRAHAM_CML_QUIESCENT_VS_NORMAL_DIVIDING_UP	21	39	2.1	0.0893282	0.0155541	PRKAR2B;CXCL10;CA1;H1-2;PTGS2;GBP1;CXCL2;FXR1;CXCL13;TPSAB1;CXCL13;RGS1;TRA2B;CXCL2;PTX3;IL1RN;CXCL6;CCL5;CXCL11;CDC42BPA;IL1B;CCL8;CCL5;INHBA
DER_IFN_GAMMA_RESPONSE_DN	4	4	Inf	0.0926309	0.0163256	INPP5A;PTX3;IDI1;SNRPB2
REACTOME_FORMATION_OF_TUBULIN_FOLDING_INTERMEDIATES_BY_CCT_TRIC	4	4	Inf	0.0926309	0.0163256	CCT5;CCT7;CCT8;TCP1
REACTOME_FOLDING_OF_ACTIN_BY_CCT_TRIC	4	4	Inf	0.0926309	0.0163256	CCT5;CCT7;CCT8;TCP1
REACTOME_NTRK2_ACTIVATES_RAC1	4	4	Inf	0.0926309	0.0163256	NTRK2;FYN;BDNF;RAC1;BDNF
WP_SARSCOV2_B117_VARIANT_ANTAGONISES_INNATE_IMMUNE_ACTIVATION	4	4	Inf	0.0926309	0.0163256	TBK1;IFNB1;IRF3;DDX58
PID_THROMBIN_PAR4_PATHWAY	4	4	Inf	0.0926309	0.0163256	ROCK2;RHOA;F2;GNAQ
REACTOME_SIGNALLING_TO_ERKS	16	28	2.4	0.0940378	0.016773	GRB2;MAPK3;SRC;MAPKAPK2;MAPKAPK3;SRC;RALB;MAPK1;YWHAB;BRAF;SHC1;CRK;CRKL;RALA;MAP2K1;YWHAB;MAPK14;SHC1;MAP2K2
REACTOME_ACTIVATION_OF_ANTERIOR_HOX_GENES_IN_HINDBRAIN_DEVELOPMENT_DURING_EARLY_EMBRYOGENESIS	16	28	2.4	0.0940378	0.016773	H2BU1;H2BC21;H2BC12;H2BC21;H2AZ1;PAGR1;RBBP5;RBBP4;POLR2K;H3C1;CNOT9;WDR5;EED;CREBBP;POLR2I;POLR2E;POLR2C
WP_MICROGLIA_PATHOGEN_PHAGOCYTOSIS_PATHWAY	16	28	2.4	0.0940378	0.016773	FCGR1A;ARPC1B;LYN;LYN;SYK;RAC2;PTPN6;SYK;VAV1;PIK3CA;PLCG2;RAC1;PIK3CG;PIK3C3;TREM2;RAC3;NCF1;TREM2;C1QC
WP_HEMATOPOIETIC_STEM_CELL_DIFFERENTIATION	16	28	2.4	0.0940378	0.016773	CSF1;ITGA2B;ITGA2B;TNXB;PIM1;FLI1;VAV1;TPO;SPI1;CSF1;KITLG;ITGA2B;MUC1;STAT5A;IL1B;THRB;IL5;IL6;CSF3
PID_ERBB1_RECEPTOR_PROXIMAL_PATHWAY	16	28	2.4	0.0940378	0.016773	GRB2;RASA1;MAPK3;GNAI3;SRC;NCK2;PTPN11;PTPN6;PIK3CA;SRC;GNAI1;MAPK1;STAT3;STAT3;GSN;GSN;PTPN11;EGF;SHC1;GAB1;SHC1
MORI_SMALL_PRE_BII_LYMPHOCYTE_DN	20	37	2.1	0.0955413	0.0171333	LUM;LCP1;DTD1;EIF4E;ISOC1;BCL2;CD36;RPN2;ZYX;LCP1;ABR;PIP4K2A;EHD1;JOSD1;ACTN4;DDX1;PDK1;HMBS;ACP1;S100A9;HSPH1
JAIN_NFKB_SIGNALING	20	37	2.1	0.0955413	0.0171333	PSMA2;JAK2;NAP1L1;TPD52L2;SNX4;DECR1;METAP1;FLT1;STK4;APRT;PMVK;PAWR;BCAT2;VEGFA;VEGFA;MED1;PEX14;DDX46;PSPH;VEGFA;ITPA;HK2
KEGG_HYPERTROPHIC_CARDIOMYOPATHY_HCM	20	37	2.1	0.0955413	0.0171333	TGFB1;ITGA2B;ITGAV;TGFB3;ITGA2B;ITGA5;ITGA11;TGFB1;TPM4;PRKAA2;TPM4;ITGAV;TNNT2;TGFB2;ITGAV;ACE;ITGA2B;CACNA2D3;ITGAV;TPM2;CACNB3;MYL3;TTN;ITGA11;IL6;DES;ITGB7;ITGA1
BIOCARTA_PPARA_PATHWAY	20	37	2.1	0.0955413	0.0171333	PRKCA;PRKAR2B;PRKCB;MAPK3;ACOX1;HSPA1A;PTGS2;HSPA1A;PIK3CA;HSD17B4;APOA1;HSPA1A;MAPK1;LPL;HSPA1A;HSPA1A;MED1;NR0B2;HSPA1B;CREBBP;HSPA1A;HSPA1A;STAT5A;PIK3CG;HSPA1A;PRKAR1A;PPARA;SRA1
