# Supplementary material for: Pregnancy-specific responses to COVID-19 are revealed by high-throughput proteomics of human plasma
Source: Research Square preprint supplement (doi:10.21203/rs.3.rs-1906806/v1), 2022-08-22
Supplement: Supplementary file 7 [file eae52b8d55b9c6779c70df14.xlsx]

## Sheet: offsign
Table 2. Proteins differentially regulated in opposite directions between pregnant and non-pregnant COVID-19 patients.
				Non-Pregnant				Pregnant
SomsScanID	SYMBOL	Target	TargetFullName	Direction	logFC	P Covid19 vs Controls	P severity trend	Direction	logFC	P Covid19 vs Controls	P severity trend
SPON1.4297.62	SPON1	Spondin-1	Spondin-1	UPinCases	0.5	0	0.000172848	DOWNinCases	-0.2	0.033	0.00138429
VEGFA.4867.15	VEGFA	VEGF121	Vascular endothelial growth factor A, isoform 121	UPinCases	0.4	0.001	0.00199287	DOWNinCases	-0.4	0.033	0.448678
MMP9.2579.17	MMP9	MMP-9	Matrix metalloproteinase-9	UPinCases	0.9	0	6.98987e-07	DOWNinCases	-0.8	0.026	0.046904
TNC.5738.25	TNC	Tenascin	Tenascin	UPinCases	0.3	0.01	0.00995831	DOWNinCases	-0.2	0.026	0.018776
ALPG.6715.63	ALPG	PPBN	Alkaline phosphatase, placental-like	UPinCases	0.3	0	0.000199549	DOWNinCases	-0.4	0.025	0.000296579
CRISPLD2.5691.2	CRISPLD2	CRLD2	Cysteine-rich secretory protein LCCL domain-containing 2	UPinCases	1.1	0	1.31261e-06	DOWNinCases	-0.7	0.02	0.0318641
FLT1.16315.105	FLT1	VEGF sR1	Vascular endothelial growth factor receptor 1	UPinCases	0.4	0	5.72249e-10	DOWNinCases	-0.7	0.012	0.000264944
F11.2190.55	F11	Coagulation Factor XI	Coagulation Factor XI	UPinCases	0.4	0	0.0146112	DOWNinCases	-0.3	0.009	0.419675
S100A9.5339.49	S100A9	calgranulin B	Protein S100-A9	UPinCases	0.6	0	0.000279621	DOWNinCases	-0.4	0.009	0.0917794
XPO5.25963.2	XPO5	XPO5	Exportin-5	UPinCases	0.3	0.038	0.149497	DOWNinCases	-0.5	0.004	0.000424971
AGT.3484.60	AGT	Angiotensinogen	Angiotensinogen	UPinCases	0.6	0	4.86745e-10	DOWNinCases	-0.2	0.003	0.444261
KNG1.7784.1	KNG1	Kininogen, HMW	Kininogen-1	UPinCases	0.3	0.001	0.00445458	DOWNinCases	-0.3	0.003	0.00522933
MAN1C1.13427.66	MAN1C1	MA1C1	Mannosyl-oligosaccharide 1,2-alpha-mannosidase IC	UPinCases	0.4	0	2.04119e-06	DOWNinCases	-0.3	0.003	0.0322429
SPON1.5496.49	SPON1	Spondin-1	Spondin-1	UPinCases	0.2	0.035	0.0124674	DOWNinCases	-0.3	0.002	1.48032e-05
WFDC1.9316.67	WFDC1	WFDC1	WAP four-disulfide core domain protein 1	UPinCases	0.4	0.009	0.0220874	DOWNinCases	-0.3	0.002	0.0231942
IL2.3070.1	IL2	IL-2	Interleukin-2	UPinCases	0.2	0.027	0.0143683	DOWNinCases	-0.6	0.001	0.00339128
MUSK.11547.84	MUSK	MUSK	Muscle, skeletal receptor tyrosine-protein kinase	UPinCases	0.3	0.015	0.0690763	DOWNinCases	-0.7	0.001	0.00394775
CPB2.3518.54	CPB2	TAFI	Carboxypeptidase B2	UPinCases	0.2	0.027	0.0198951	DOWNinCases	-0.5	0	1.33541e-06
F9.4876.32	F9	Coagulation Factor IX	Coagulation factor IX	UPinCases	0.3	0	3.65032e-07	DOWNinCases	-0.4	0	0.00501107
F9.5307.12	F9	Coagulation Factor IXab	Coagulation factor IXab	UPinCases	0.3	0	9.72683e-07	DOWNinCases	-0.5	0	0.00458576
ECH1.12662.82	ECH1	ECH1	Delta(3,5)-Delta(2,4)-dienoyl-CoA isomerase, mitochondrial	DOWNinCases	-0.8	0	0.0214627	UPinCases	0.5	0.05	0.00122766
UBE2S.17729.20	UBE2S	UBE2S	Ubiquitin-conjugating enzyme E2 S	DOWNinCases	-0.5	0.001	0.108555	UPinCases	0.3	0.044	0.00557459
DECR2.18343.10	DECR2	DECR2	Peroxisomal 2,4-dienoyl-CoA reductase	DOWNinCases	-0.7	0	0.000508183	UPinCases	0.3	0.041	0.0454268
ITGA1.ITGB1.3503.4	ITGA1	Integrin a1b1	Integrin alpha-I: beta-1 complex	DOWNinCases	-0.4	0.013	0.488993	UPinCases	0.5	0.037	0.0727957
RAB24.20934.13	RAB24	RAB24	Ras-related protein Rab-24	DOWNinCases	-0.7	0	0.00122107	UPinCases	0.4	0.037	0.0113722
PLOD2.6923.1	PLOD2	PLOD2	Procollagen-lysine,2-oxoglutarate 5-dioxygenase 2	DOWNinCases	-0.4	0.007	0.0201706	UPinCases	0.3	0.031	0.117368
ABLIM3.13578.98	ABLIM3	ABLM3	Actin-binding LIM protein 3	DOWNinCases	-0.6	0	0.00535286	UPinCases	0.5	0.024	0.0185289
CGA.FSHB.3032.11	CGA	FSH	Follicle stimulating hormone	DOWNinCases	-0.6	0.01	0.0728387	UPinCases	0.2	0.018	0.214176
SCPEP1.23203.3	SCPEP1	RISC	Retinoid-inducible serine carboxypeptidase	DOWNinCases	-0.4	0.004	0.0128789	UPinCases	0.4	0.014	0.000773241
THPO.5947.90	THPO	Tpo	Thrombopoietin	DOWNinCases	-0.4	0.003	0.00195095	UPinCases	0.5	0.009	1.08361e-05
CPOX.18241.18	CPOX	HEM6	Oxygen-dependent coproporphyrinogen-III oxidase, mitochondrial	DOWNinCases	-0.4	0.011	0.0510464	UPinCases	0.4	0.007	0.0085755
FDPS.21501.30	FDPS	FPPS	Farnesyl pyrophosphate synthetase	DOWNinCases	-0.3	0.018	0.174016	UPinCases	0.3	0.006	0.0660725
TYMP.11361.73	TYMP	TP	Thymidine phosphorylase	DOWNinCases	-0.6	0	0.0016682	UPinCases	0.6	0.001	1.46394e-05
