# Supplementary material for: Pregnancy-specific responses to COVID-19 are revealed by high-throughput proteomics of human plasma
Source: Research Square preprint supplement (doi:10.21203/rs.3.rs-1906806/v1), 2022-08-22
Supplement: Supplementary file 8 [file eae61740f3209beb17ff3ef1.xlsx]

## Sheet: Off_sign_Cases-Controls_BP
Supplementary Table 7. Biological processes and C2 pathways enriched among proteins regulated in opposite directions between pregnant and non-pregnant COVID-19 patients.
Category	Count	Size	OddsRatio	q	Pvalue	Genes
Biological processes (Gene ontology)
positive regulation of blood vessel diameter	4	25	41.6	0.003	7.0543e-06	AGT,SCPEP1,ITGA1,KNG1
vasodilation	3	12	70.4	0.007	2.72584e-05	AGT,ITGA1,KNG1
vascular process in circulatory system	5	77	15.6	0.007	4.14888e-05	AGT,VEGFA,SCPEP1,ITGA1,KNG1
blood coagulation, intrinsic pathway	3	16	48.7	0.008	6.84118e-05	F9,F11,KNG1
extracellular matrix organization	7	230	7.5	0.011	0.000139393	AGT,CRISPLD2,MMP9,PLOD2,TNC,ITGA1,CPB2
negative regulation of wound healing	4	58	16.1	0.011	0.000209848	F11,WFDC1,CPB2,KNG1
regulation of tube size	4	59	15.8	0.011	0.000224293	AGT,SCPEP1,ITGA1,KNG1
regulation of tube diameter	4	59	15.8	0.011	0.000224293	AGT,SCPEP1,ITGA1,KNG1
regulation of blood vessel size	4	59	15.8	0.011	0.000224293	AGT,SCPEP1,ITGA1,KNG1
regulation of blood vessel diameter	4	59	15.8	0.011	0.000224293	AGT,SCPEP1,ITGA1,KNG1
blood coagulation, fibrin clot formation	3	25	28.7	0.012	0.000272192	F9,F11,KNG1
extracellular structure organization	7	261	6.5	0.012	0.000305344	AGT,CRISPLD2,MMP9,PLOD2,TNC,ITGA1,CPB2
metabolic process	30	4259	12	0.014	0.000403507	AGT,FLT1,MAN1C1,F9,F11,DECR2,MMP9,S100A9,ABLIM3,ALPG,SPON1,TYMP,RAB24,ECH1,UBE2S,VEGFA,THPO,SCPEP1,PLOD2,WFDC1,TNC,CGA,CPOX,ITGA1,FDPS,CPB2,MUSK,IL2,KNG1,XPO5
negative regulation of response to wounding	4	69	13.3	0.014	0.000410836	F11,WFDC1,CPB2,KNG1
regulation of kidney development	3	29	24.3	0.014	0.000426373	AGT,MMP9,VEGFA
proteolysis	13	945	3.9	0.014	0.000469347	AGT,F9,F11,MMP9,S100A9,SPON1,UBE2S,VEGFA,SCPEP1,WFDC1,CGA,CPB2,KNG1
protein activation cascade	4	81	11.2	0.022	0.000756931	F9,F11,CPB2,KNG1
regulation of response to external stimulus	9	506	4.5	0.022	0.000793178	AGT,F11,MMP9,S100A9,VEGFA,WFDC1,CPB2,IL2,KNG1
zymogen activation	3	37	18.6	0.023	0.000881447	F9,F11,CPB2
blood circulation	6	229	6.1	0.024	0.000995136	AGT,VEGFA,SCPEP1,ITGA1,IL2,KNG1
circulatory system process	6	233	6	0.025	0.00108928	AGT,VEGFA,SCPEP1,ITGA1,IL2,KNG1
negative regulation of proteolysis	6	237	5.9	0.026	0.00119018	AGT,MMP9,VEGFA,WFDC1,CPB2,KNG1
regulation of wound healing	4	92	9.8	0.026	0.00122144	F11,WFDC1,CPB2,KNG1
negative regulation of blood coagulation	3	44	15.4	0.029	0.00146585	F11,CPB2,KNG1
negative regulation of hemostasis	3	45	15	0.029	0.00156503	F11,CPB2,KNG1
protein processing	5	169	6.8	0.029	0.00162239	F9,F11,SPON1,CGA,CPB2
regulation of inflammatory response	6	253	5.5	0.029	0.00166784	AGT,MMP9,S100A9,WFDC1,CPB2,IL2
negative regulation of coagulation	3	46	14.6	0.029	0.00166834	F11,CPB2,KNG1
negative regulation of endopeptidase activity	5	171	6.7	0.029	0.00170931	AGT,MMP9,VEGFA,WFDC1,KNG1
regulation of epidermal growth factor receptor signaling pathway	3	48	14	0.03	0.00188756	AGT,MMP9,ITGA1
regulation of proteolysis	8	460	4.2	0.03	0.0019247	AGT,MMP9,S100A9,SPON1,VEGFA,WFDC1,CPB2,KNG1
negative regulation of peptidase activity	5	177	6.4	0.03	0.0019908	AGT,MMP9,VEGFA,WFDC1,KNG1
regulation of ERBB signaling pathway	3	50	13.4	0.031	0.00212401	AGT,MMP9,ITGA1
positive regulation of cellular protein metabolic process	11	833	3.4	0.032	0.00219803	AGT,FLT1,MMP9,S100A9,SPON1,UBE2S,VEGFA,THPO,ITGA1,MUSK,IL2
cellular metabolic process	28	3963	4.7	0.032	0.00229135	AGT,FLT1,MAN1C1,DECR2,MMP9,S100A9,ABLIM3,ALPG,SPON1,TYMP,RAB24,ECH1,UBE2S,VEGFA,THPO,SCPEP1,PLOD2,WFDC1,TNC,CGA,CPOX,ITGA1,FDPS,CPB2,MUSK,IL2,KNG1,XPO5
regulation of endopeptidase activity	6	274	5.1	0.034	0.00250317	AGT,MMP9,S100A9,VEGFA,WFDC1,KNG1
regulation of response to wounding	4	115	7.8	0.037	0.00278006	F11,WFDC1,CPB2,KNG1
regulation of cell proliferation	11	862	3.3	0.037	0.00290409	AGT,FLT1,MMP9,VEGFA,THPO,WFDC1,TNC,CGA,ITGA1,CPB2,IL2
regulation of cellular protein metabolic process	14	1301	3	0.04	0.00317878	AGT,FLT1,MMP9,S100A9,SPON1,UBE2S,VEGFA,THPO,WFDC1,ITGA1,CPB2,MUSK,IL2,KNG1
regulation of blood coagulation	3	59	11.2	0.041	0.0034132	F11,CPB2,KNG1
protein maturation	5	201	5.6	0.041	0.00346645	F9,F11,SPON1,CGA,CPB2
regulation of peptidase activity	6	293	4.7	0.041	0.0035032	AGT,MMP9,S100A9,VEGFA,WFDC1,KNG1
regulation of hemostasis	3	60	11	0.041	0.00358024	F11,CPB2,KNG1
regulation of coagulation	3	61	10.8	0.041	0.00375222	F11,CPB2,KNG1
positive regulation of protein metabolic process	11	890	3.2	0.041	0.00375374	AGT,FLT1,MMP9,S100A9,SPON1,UBE2S,VEGFA,THPO,ITGA1,MUSK,IL2
positive regulation of response to external stimulus	5	212	5.3	0.046	0.00435706	AGT,S100A9,VEGFA,CPB2,IL2
positive regulation of cell proliferation	8	528	3.6	0.047	0.00457109	AGT,FLT1,MMP9,VEGFA,THPO,TNC,CGA,IL2
protein metabolic process	21	2560	2.8	0.047	0.00467191	AGT,FLT1,MAN1C1,F9,F11,MMP9,S100A9,SPON1,UBE2S,VEGFA,THPO,SCPEP1,PLOD2,WFDC1,TNC,CGA,ITGA1,CPB2,MUSK,IL2,KNG1
regulation of steroid metabolic process	3	66	10	0.047	0.00468776	AGT,CGA,FDPS
negative regulation of response to external stimulus	5	218	5.2	0.048	0.00490689	F11,WFDC1,CPB2,IL2,KNG1
organic substance metabolic process	28	4103	4.2	0.048	0.00500263	AGT,FLT1,MAN1C1,F9,F11,DECR2,MMP9,S100A9,ABLIM3,SPON1,TYMP,ECH1,UBE2S,VEGFA,THPO,SCPEP1,PLOD2,WFDC1,TNC,CGA,CPOX,ITGA1,FDPS,CPB2,MUSK,IL2,KNG1,XPO5
negative regulation of epithelial cell proliferation	3	69	9.5	0.05	0.00531114	FLT1,WFDC1,CPB2
epidermal growth factor receptor signaling pathway	3	70	9.4	0.051	0.00552951	AGT,MMP9,ITGA1
positive regulation of protein modification process	9	676	3.2	0.053	0.00597406	AGT,FLT1,MMP9,UBE2S,VEGFA,THPO,ITGA1,MUSK,IL2
wound healing	6	327	4.2	0.053	0.00600645	F9,F11,WFDC1,TNC,CPB2,KNG1
regulation of anatomical structure size	5	232	4.8	0.056	0.00638071	AGT,VEGFA,SCPEP1,ITGA1,KNG1
regulation of cell growth	5	233	4.8	0.056	0.00649675	AGT,S100A9,VEGFA,WFDC1,IL2
positive regulation of transferase activity	6	337	4.1	0.058	0.00694596	AGT,FLT1,UBE2S,VEGFA,ITGA1,IL2
regulation of protein metabolic process	14	1415	2.7	0.059	0.00712175	AGT,FLT1,MMP9,S100A9,SPON1,UBE2S,VEGFA,THPO,WFDC1,ITGA1,CPB2,MUSK,IL2,KNG1
positive regulation of macromolecule metabolic process	14	1423	2.6	0.059	0.00750733	AGT,FLT1,MMP9,S100A9,ABLIM3,SPON1,UBE2S,VEGFA,THPO,TNC,CGA,ITGA1,MUSK,IL2
leukocyte chemotaxis	4	152	5.8	0.059	0.00751604	FLT1,S100A9,VEGFA,ITGA1
myeloid leukocyte migration	4	152	5.8	0.059	0.00751604	FLT1,S100A9,VEGFA,ITGA1
urogenital system development	4	153	5.7	0.059	0.0076899	AGT,MMP9,VEGFA,TNC
positive regulation of lipid metabolic process	3	79	8.2	0.059	0.00773988	AGT,FLT1,CGA
organonitrogen compound metabolic process	23	3059	2.7	0.06	0.00805037	AGT,FLT1,MAN1C1,F9,F11,MMP9,S100A9,SPON1,TYMP,UBE2S,VEGFA,THPO,SCPEP1,PLOD2,WFDC1,TNC,CGA,CPOX,ITGA1,CPB2,MUSK,IL2,KNG1
primary metabolic process	27	3947	3.4	0.06	0.00816425	AGT,FLT1,MAN1C1,F9,F11,DECR2,MMP9,S100A9,ABLIM3,SPON1,TYMP,ECH1,UBE2S,VEGFA,THPO,SCPEP1,PLOD2,WFDC1,TNC,CGA,ITGA1,FDPS,CPB2,MUSK,IL2,KNG1,XPO5
positive regulation of neuron projection development	4	156	5.6	0.06	0.00822746	AGT,S100A9,VEGFA,IL2
response to external stimulus	13	1284	2.6	0.06	0.00839252	AGT,FLT1,F11,MMP9,S100A9,TYMP,VEGFA,WFDC1,TNC,ITGA1,CPB2,IL2,KNG1
regulation of growth	6	353	3.9	0.061	0.00866785	AGT,S100A9,VEGFA,WFDC1,MUSK,IL2
positive regulation of protein phosphorylation	8	588	3.2	0.061	0.00874156	AGT,FLT1,MMP9,VEGFA,THPO,ITGA1,MUSK,IL2
negative regulation of protein metabolic process	8	589	3.2	0.061	0.00882968	AGT,MMP9,SPON1,VEGFA,WFDC1,CPB2,IL2,KNG1
branching morphogenesis of an epithelial tube	3	84	7.7	0.062	0.00916397	AGT,VEGFA,TNC
regulation of body fluid levels	5	256	4.3	0.063	0.00959729	F9,F11,VEGFA,CPB2,KNG1
inflammatory response	7	475	3.4	0.063	0.00959983	AGT,MMP9,S100A9,WFDC1,CPB2,IL2,KNG1
ERBB signaling pathway	3	86	7.5	0.064	0.00977388	AGT,MMP9,ITGA1
peptidyl-tyrosine phosphorylation	5	259	4.3	0.064	0.0100662	AGT,FLT1,VEGFA,MUSK,IL2
cell proliferation	11	1012	2.7	0.064	0.0101412	AGT,FLT1,MMP9,VEGFA,THPO,WFDC1,TNC,CGA,ITGA1,CPB2,IL2
negative regulation of hydrolase activity	5	260	4.3	0.064	0.0102259	AGT,MMP9,VEGFA,WFDC1,KNG1
peptidyl-tyrosine modification	5	262	4.2	0.065	0.0105507	AGT,FLT1,VEGFA,MUSK,IL2
cellular divalent inorganic cation homeostasis	4	169	5.2	0.066	0.0108436	AGT,S100A9,IL2,KNG1
positive regulation of cell growth	3	91	7.1	0.068	0.011401	S100A9,VEGFA,IL2
positive regulation of phosphorylation	8	616	3	0.068	0.0114759	AGT,FLT1,MMP9,VEGFA,THPO,ITGA1,MUSK,IL2
cell growth	5	268	4.1	0.068	0.0115681	AGT,S100A9,VEGFA,WFDC1,IL2
positive regulation of epithelial cell migration	3	92	7	0.068	0.0117441	AGT,MMP9,VEGFA
negative regulation of cell adhesion	4	174	5	0.069	0.0119787	VEGFA,TNC,IL2,KNG1
lipid modification	3	94	6.9	0.07	0.0124482	AGT,DECR2,ECH1
divalent inorganic cation homeostasis	4	176	5	0.07	0.0124535	AGT,S100A9,IL2,KNG1
lung development	3	95	6.8	0.071	0.0128093	CRISPLD2,VEGFA,TNC
respiratory tube development	3	96	6.7	0.072	0.0131763	CRISPLD2,VEGFA,TNC
cellular homeostasis	6	387	3.5	0.072	0.013328	AGT,S100A9,UBE2S,CPB2,IL2,KNG1
response to wounding	6	390	3.5	0.074	0.0138107	F9,F11,WFDC1,TNC,CPB2,KNG1
regulation of lipid metabolic process	4	182	4.8	0.074	0.0139506	AGT,FLT1,CGA,FDPS
positive regulation of inflammatory response	3	99	6.5	0.074	0.0143136	AGT,S100A9,IL2
growth	7	513	3.1	0.074	0.0143543	AGT,S100A9,VEGFA,WFDC1,TNC,MUSK,IL2
positive regulation of nitrogen compound metabolic process	13	1368	2.4	0.074	0.0144081	AGT,FLT1,MMP9,S100A9,ABLIM3,SPON1,UBE2S,VEGFA,THPO,CGA,ITGA1,MUSK,IL2
positive regulation of metabolic process	14	1539	2.4	0.077	0.0153157	AGT,FLT1,MMP9,S100A9,ABLIM3,SPON1,UBE2S,VEGFA,THPO,TNC,CGA,ITGA1,MUSK,IL2
cellular protein metabolic process	18	2229	2.3	0.077	0.0154752	AGT,FLT1,MAN1C1,MMP9,S100A9,SPON1,UBE2S,VEGFA,THPO,SCPEP1,PLOD2,WFDC1,TNC,ITGA1,CPB2,MUSK,IL2,KNG1
respiratory system development	3	102	6.3	0.077	0.0155054	CRISPLD2,VEGFA,TNC
regulation of hydrolase activity	8	650	2.9	0.077	0.0156122	AGT,FLT1,MMP9,S100A9,VEGFA,WFDC1,ITGA1,KNG1
positive regulation of phosphorus metabolic process	8	652	2.9	0.077	0.015886	AGT,FLT1,MMP9,VEGFA,THPO,ITGA1,MUSK,IL2
positive regulation of phosphate metabolic process	8	652	2.9	0.077	0.015886	AGT,FLT1,MMP9,VEGFA,THPO,ITGA1,MUSK,IL2
positive regulation of neuron differentiation	4	193	4.5	0.079	0.0169857	AGT,S100A9,VEGFA,IL2
positive regulation of apoptotic signaling pathway	3	106	6.1	0.079	0.0171799	AGT,MMP9,S100A9
blood coagulation	4	194	4.5	0.079	0.0172806	F9,F11,CPB2,KNG1
positive regulation of cell projection organization	4	194	4.5	0.079	0.0172806	AGT,S100A9,VEGFA,IL2
regulation of epithelial cell proliferation	4	194	4.5	0.079	0.0172806	FLT1,VEGFA,WFDC1,CPB2
cell chemotaxis	4	194	4.5	0.079	0.0172806	FLT1,S100A9,VEGFA,ITGA1
positive regulation of cytosolic calcium ion concentration	3	107	6	0.079	0.0176138	AGT,IL2,KNG1
morphogenesis of a branching epithelium	3	107	6	0.079	0.0176138	AGT,VEGFA,TNC
coagulation	4	196	4.4	0.079	0.0178803	F9,F11,CPB2,KNG1
positive regulation of kinase activity	5	300	3.7	0.079	0.018152	AGT,FLT1,VEGFA,ITGA1,IL2
hemostasis	4	197	4.4	0.079	0.018185	F9,F11,CPB2,KNG1
cellular chemical homeostasis	5	306	3.6	0.083	0.0196176	AGT,S100A9,CPB2,IL2,KNG1
transmembrane receptor protein tyrosine kinase signaling pathway	6	422	3.2	0.083	0.0197568	AGT,FLT1,MMP9,VEGFA,ITGA1,MUSK
positive regulation of cellular metabolic process	13	1422	2.3	0.083	0.0198228	AGT,FLT1,MMP9,S100A9,ABLIM3,SPON1,UBE2S,VEGFA,THPO,CGA,ITGA1,MUSK,IL2
STAT cascade	3	112	5.7	0.083	0.0198759	AGT,THPO,IL2
negative regulation of cellular protein metabolic process	7	547	2.9	0.083	0.0198964	AGT,MMP9,VEGFA,WFDC1,CPB2,IL2,KNG1
cellular lipid metabolic process	6	428	3.1	0.087	0.0210429	AGT,FLT1,DECR2,ECH1,SCPEP1,FDPS
regulation of macromolecule metabolic process	18	2293	2.2	0.087	0.0211459	AGT,FLT1,MMP9,S100A9,ABLIM3,SPON1,UBE2S,VEGFA,THPO,WFDC1,TNC,CGA,ITGA1,CPB2,MUSK,IL2,KNG1,XPO5
morphogenesis of a branching structure	3	116	5.5	0.089	0.0217968	AGT,VEGFA,TNC
secretion by cell	9	837	2.5	0.092	0.0230366	AGT,CRISPLD2,MMP9,S100A9,RAB24,VEGFA,CPB2,IL2,KNG1
regulation of metabolic process	19	2500	2.2	0.092	0.0234544	AGT,FLT1,MMP9,S100A9,ABLIM3,SPON1,UBE2S,VEGFA,THPO,WFDC1,TNC,CGA,ITGA1,FDPS,CPB2,MUSK,IL2,KNG1,XPO5
positive regulation of molecular function	9	840	2.5	0.092	0.0235349	AGT,FLT1,MMP9,S100A9,SPON1,UBE2S,VEGFA,ITGA1,IL2
regulation of response to stress	9	840	2.5	0.092	0.0235349	AGT,F11,MMP9,S100A9,VEGFA,WFDC1,CPB2,IL2,KNG1
positive regulation of cell migration	5	321	3.4	0.092	0.0236222	AGT,FLT1,MMP9,VEGFA,CGA
regulation of cytosolic calcium ion concentration	3	120	5.3	0.092	0.0238169	AGT,IL2,KNG1
cellular metal ion homeostasis	4	216	4	0.095	0.024605	AGT,S100A9,IL2,KNG1
MSigDB C2 gene sets collection
SESTO_RESPONSE_TO_UV_C6	4	24	49.6	0.000424425	3.47889e-06	MMP9;ECH1;TNC;FDPS
CAIRO_LIVER_DEVELOPMENT_DN	6	134	12.4	0.000906146	2.5493e-05	AGT;F11;S100A9;ECH1;CPB2;KNG1
BIOCARTA_NO1_PATHWAY	3	14	65.4	0.000906146	2.98017e-05	FLT1;VEGFA;KNG1
NABA_MATRISOME	12	708	5.4	0.000906146	3.35294e-05	AGT;F9;CRISPLD2;MMP9;S100A9;SPON1;VEGFA;THPO;PLOD2;TNC;F9;IL2;SPON1;KNG1
BIOCARTA_INTRINSIC_PATHWAY	3	15	60	0.000906146	3.71371e-05	F9;F11;F9;KNG1
PLASARI_TGFB1_TARGETS_10HR_UP	5	98	13.7	0.00138227	7.00058e-05	FLT1;CRISPLD2;MMP9;VEGFA;TNC
HSIAO_LIVER_SPECIFIC_GENES	6	168	9.7	0.00138227	9.08605e-05	AGT;F9;F11;PLOD2;CPB2;F9;KNG1
REACTOME_INTRINSIC_PATHWAY_OF_FIBRIN_CLOT_FORMATION	3	21	40	0.00138227	0.000106561	F9;F11;F9;KNG1
LU_TUMOR_ANGIOGENESIS_UP	3	21	40	0.00138227	0.000106561	MMP9;TYMP;VEGFA
YOSHIMURA_MAPK8_TARGETS_DN	6	176	9.2	0.00138227	0.000117555	FLT1;SPON1;VEGFA;WFDC1;FDPS;IL2;SPON1
KEGG_COMPLEMENT_AND_COAGULATION_CASCADES	4	58	18.3	0.00138227	0.000124631	F9;F11;CPB2;F9;KNG1
WP_ANGIOGENESIS	3	24	34.3	0.00163346	0.000160669	FLT1;MMP9;VEGFA
BOYLAN_MULTIPLE_MYELOMA_PCA1_UP	4	64	16.5	0.0017184	0.000183108	MMP9;S100A9;SPON1;ITGA1;SPON1
WP_PHOTODYNAMIC_THERAPYINDUCED_NFKB_SURVIVAL_SIGNALING	3	29	27.7	0.00235072	0.000285617	MMP9;VEGFA;IL2
WP_BURN_WOUND_HEALING	4	72	14.6	0.00235072	0.000289023	MMP9;S100A9;VEGFA;TNC
LIU_PROSTATE_CANCER_DN	6	215	7.5	0.00266964	0.000350116	CRISPLD2;SPON1;VEGFA;SCPEP1;WFDC1;ITGA1;SPON1
WP_BLADDER_CANCER	3	32	24.8	0.00275669	0.000384129	MMP9;TYMP;VEGFA
KEGG_BLADDER_CANCER	3	34	23.2	0.00312172	0.000460582	MMP9;TYMP;VEGFA
REACTOME_FORMATION_OF_FIBRIN_CLOT_CLOTTING_CASCADE	3	35	22.5	0.00317038	0.000502209	F9;F11;F9;KNG1
NABA_MATRISOME_ASSOCIATED	9	545	4.7	0.00317038	0.000519735	AGT;F9;MMP9;S100A9;VEGFA;THPO;PLOD2;F9;IL2;KNG1
NABA_ECM_REGULATORS	5	157	8.3	0.003692	0.000635509	AGT;F9;MMP9;PLOD2;F9;KNG1
YOSHIMURA_MAPK8_TARGETS_UP	9	569	4.5	0.00395204	0.000712664	AGT;MMP9;RAB24;THPO;TNC;CGA;MUSK;IL2;KNG1
YAMASHITA_LIVER_CANCER_STEM_CELL_DN	3	41	18.9	0.0040451	0.000802965	F9;F11;F9;KNG1
DOANE_RESPONSE_TO_ANDROGEN_DN	4	95	10.8	0.0040451	0.000831189	ABLIM3;PLOD2;TNC;CPOX
WP_NRP1TRIGGERED_SIGNALING_PATHWAYS_IN_PANCREATIC_CANCER	3	42	18.5	0.0040451	0.00086207	FLT1;MMP9;VEGFA
PID_AP1_PATHWAY	3	42	18.5	0.0040451	0.00086207	AGT;MMP9;IL2
IWANAGA_CARCINOGENESIS_BY_KRAS_DN	3	46	16.7	0.00490592	0.00112595	FLT1;SPON1;ITGA1;SPON1
PID_INTEGRIN1_PATHWAY	3	46	16.7	0.00490592	0.00112595	VEGFA;TNC;ITGA1
WP_COMPLEMENT_AND_COAGULATION_CASCADES	3	49	15.6	0.00569612	0.00135399	F9;CPB2;F9;KNG1
REACTOME_PEPTIDE_HORMONE_METABOLISM	3	50	15.3	0.00583969	0.00143599	AGT;CGA;CPB2
REACTOME_POST_TRANSLATIONAL_PROTEIN_MODIFICATION	9	637	4	0.00628677	0.00160132	MAN1C1;F9;ALPG;SPON1;RAB24;UBE2S;TNC;CGA;F9;SPON1;KNG1
DAZARD_RESPONSE_TO_UV_NHEK_UP	4	115	8.9	0.00628677	0.00169367	S100A9;TYMP;UBE2S;KNG1
VANTVEER_BREAST_CANCER_METASTASIS_DN	3	53	14.4	0.00628677	0.00170052	FLT1;MMP9;VEGFA
REACTOME_EXTRACELLULAR_MATRIX_ORGANIZATION	5	202	6.4	0.00705665	0.00196661	MMP9;PLOD2;TNC;ITGA1;MUSK
LU_AGING_BRAIN_UP	4	127	8	0.00849471	0.00243701	AGT;SPON1;VEGFA;PLOD2;SPON1
WP_FOCAL_ADHESION	4	129	7.9	0.00874218	0.00257966	FLT1;VEGFA;TNC;ITGA1
WP_CLEAR_CELL_RENAL_CELL_CARCINOMA_PATHWAYS	3	62	12.2	0.00880511	0.0026704	FLT1;VEGFA;PLOD2
KEGG_FOCAL_ADHESION	4	133	7.6	0.00925296	0.00288207	FLT1;VEGFA;TNC;ITGA1
WP_PI3KAKT_SIGNALING_PATHWAY	5	226	5.7	0.0100356	0.0032081	FLT1;VEGFA;TNC;ITGA1;IL2
JAATINEN_HEMATOPOIETIC_STEM_CELL_DN	4	139	7.3	0.0103094	0.00338012	MAN1C1;CRISPLD2;MMP9;S100A9
BOYLAN_MULTIPLE_MYELOMA_C_D_DN	4	141	7.2	0.0105172	0.00355844	MMP9;S100A9;SPON1;ITGA1;SPON1
HINATA_NFKB_TARGETS_KERATINOCYTE_UP	3	69	10.9	0.0105172	0.00362068	MMP9;VEGFA;TNC
REACTOME_HEMOSTASIS	6	349	4.5	0.0121225	0.00427268	F9;F11;VEGFA;THPO;ITGA1;F9;KNG1
CAIRO_HEPATOBLASTOMA_DN	4	151	6.7	0.0126078	0.00454707	MAN1C1;F9;F11;ABLIM3;F9
WP_OREXIN_RECEPTOR_PATHWAY	3	78	9.6	0.0138643	0.00511386	VEGFA;TNC;CGA
NAKAMURA_TUMOR_ZONE_PERIPHERAL_VS_CENTRAL_DN	5	260	4.9	0.0151412	0.00582845	S100A9;RAB24;VEGFA;PLOD2;CGA
BLANCO_MELO_RESPIRATORY_SYNCYTIAL_VIRUS_INFECTION_A594_CELLS_UP	4	162	6.2	0.0151412	0.00583307	CRISPLD2;MMP9;PLOD2;TNC
WP_IL18_SIGNALING_PATHWAY	4	165	6.1	0.0158143	0.00622203	MMP9;SPON1;ECH1;VEGFA;SPON1
WP_VITAMIN_D_RECEPTOR_PATHWAY	3	97	7.6	0.0232795	0.00934998	S100A9;ALPG;KNG1
MEISSNER_BRAIN_HCP_WITH_H3K4ME3_AND_H3K27ME3	6	413	3.7	0.0234349	0.00960447	FLT1;CRISPLD2;ABLIM3;SPON1;THPO;PLOD2;SPON1
WP_FOCAL_ADHESION_PI3KAKTMTORSIGNALING_PATHWAY	4	191	5.2	0.0247321	0.0103388	FLT1;VEGFA;TNC;IL2
REACTOME_CLASS_A_1_RHODOPSIN_LIKE_RECEPTORS	3	103	7.1	0.0258333	0.0110109	AGT;CGA;KNG1
VERHAAK_AML_WITH_NPM1_MUTATED_DN	3	110	6.7	0.0294348	0.0131524	MMP9;SPON1;VEGFA;SPON1
CAIRO_HEPATOBLASTOMA_CLASSES_DN	3	111	6.6	0.0294348	0.0134765	MAN1C1;SPON1;WFDC1;SPON1
IVANOVA_HEMATOPOIESIS_LATE_PROGENITOR	4	208	4.8	0.0294348	0.0138138	CPOX;ITGA1;FDPS;XPO5
HELLER_HDAC_TARGETS_SILENCED_BY_METHYLATION_UP	4	208	4.8	0.0294348	0.0138138	CRISPLD2;ALPG;UBE2S;CGA
CUI_TCF21_TARGETS_2_DN	5	322	3.9	0.0294348	0.0140117	FLT1;ABLIM3;VEGFA;PLOD2;KNG1
GAL_LEUKEMIC_STEM_CELL_DN	3	113	6.5	0.0294348	0.0141383	MMP9;S100A9;TYMP
MCBRYAN_PUBERTAL_TGFB1_TARGETS_UP	3	114	6.4	0.0294348	0.0144761	VEGFA;PLOD2;TNC
RODWELL_AGING_KIDNEY_NO_BLOOD_UP	3	114	6.4	0.0294348	0.0144761	SPON1;TNC;ITGA1;SPON1
NABA_ECM_GLYCOPROTEINS	3	119	6.1	0.0319446	0.0162342	CRISPLD2;SPON1;TNC;SPON1
WP_OVERVIEW_OF_PROINFLAMMATORY_AND_PROFIBROTIC_MEDIATORS	3	119	6.1	0.0319446	0.0162342	MMP9;VEGFA;IL2
RODWELL_AGING_KIDNEY_UP	4	235	4.2	0.0401486	0.0207325	SPON1;TYMP;TNC;ITGA1;SPON1
VART_KSHV_INFECTION_ANGIOGENIC_MARKERS_UP	3	133	5.5	0.0415081	0.0217747	FLT1;MMP9;VEGFA
HORIUCHI_WTAP_TARGETS_UP	3	138	5.3	0.0450009	0.0239759	FLT1;MAN1C1;ITGA1
ACEVEDO_LIVER_CANCER_DN	4	251	3.9	0.0474926	0.0256927	AGT;F9;CRISPLD2;F9;KNG1
DEURIG_T_CELL_PROLYMPHOCYTIC_LEUKEMIA_UP	3	153	4.7	0.0561262	0.0312835	CRISPLD2;MMP9;SPON1;SPON1
REACTOME_GPCR_LIGAND_BINDING	3	153	4.7	0.0561262	0.0312835	AGT;CGA;KNG1
BOQUEST_STEM_CELL_UP	3	158	4.6	0.0583143	0.0339533	MAN1C1;CRISPLD2;TNC
REACTOME_METABOLISM_OF_LIPIDS	4	276	3.5	0.0583143	0.0347857	AGT;DECR2;CGA;FDPS
NABA_SECRETED_FACTORS	4	276	3.5	0.0583143	0.0347857	S100A9;VEGFA;THPO;IL2
SMID_BREAST_CANCER_RELAPSE_IN_BONE_DN	3	160	4.5	0.0583143	0.0350538	S100A9;VEGFA;PLOD2
MIKKELSEN_MCV6_HCP_WITH_H3K27ME3	3	161	4.5	0.0583143	0.035611	MMP9;ABLIM3;SPON1;SPON1
REACTOME_PLATELET_ACTIVATION_SIGNALING_AND_AGGREGATION	3	161	4.5	0.0583143	0.035611	VEGFA;THPO;KNG1
WINTER_HYPOXIA_METAGENE	3	162	4.5	0.0583143	0.0361729	FLT1;VEGFA;PLOD2
NABA_CORE_MATRISOME	3	163	4.4	0.0583143	0.0367394	CRISPLD2;SPON1;TNC;SPON1
WP_MALIGNANT_PLEURAL_MESOTHELIOMA	4	281	3.5	0.0583143	0.0368049	FLT1;MMP9;VEGFA;ITGA1
MCLACHLAN_DENTAL_CARIES_UP	3	166	4.3	0.0601655	0.0384665	MMP9;S100A9;TYMP
MEBARKI_HCC_PROGENITOR_FZD8CRD_DN	3	167	4.3	0.0603072	0.0390514	AGT;MAN1C1;VEGFA
HOSHIDA_LIVER_CANCER_SUBCLASS_S3	3	170	4.2	0.0622714	0.0408337	F11;CPB2;KNG1
BLALOCK_ALZHEIMERS_DISEASE_INCIPIENT_UP	3	171	4.2	0.0624112	0.041437	PLOD2;TNC;ITGA1
TARTE_PLASMA_CELL_VS_PLASMABLAST_DN	3	175	4.1	0.065308	0.0438956	UBE2S;CPOX;FDPS
GOLDRATH_ANTIGEN_RESPONSE	3	183	3.9	0.0713221	0.0490297	ECH1;SCPEP1;CPOX
REACTOME_NEUTROPHIL_DEGRANULATION	4	309	3.1	0.0713221	0.0493657	CRISPLD2;MMP9;S100A9;RAB24
JINESH_BLEBBISHIELD_TO_IMMUNE_CELL_FUSION_PBSHMS_DN	3	184	3.9	0.0713221	0.0496916	S100A9;VEGFA;SCPEP1
SMID_BREAST_CANCER_BASAL_UP	4	314	3.1	0.0735307	0.0518331	S100A9;UBE2S;VEGFA;PLOD2
BOCHKIS_FOXA2_TARGETS	3	191	3.8	0.0763538	0.0544491	THPO;PLOD2;KNG1
TARTE_PLASMA_CELL_VS_PLASMABLAST_UP	3	199	3.6	0.0833871	0.0601481	MMP9;S100A9;TNC
BRUINS_UVC_RESPONSE_VIA_TP53_GROUP_A	4	338	2.9	0.0885792	0.0646192	SCPEP1;TNC;CGA;CPB2
KOINUMA_TARGETS_OF_SMAD2_OR_SMAD3	4	341	2.8	0.0896714	0.0663264	MMP9;ECH1;PLOD2;TNC
SHEDDEN_LUNG_CANCER_POOR_SURVIVAL_A6	3	208	3.4	0.0896714	0.066886	UBE2S;VEGFA;PLOD2
RIGGI_EWING_SARCOMA_PROGENITOR_UP	3	209	3.4	0.0897173	0.0676556	MMP9;WFDC1;TNC
NUYTTEN_EZH2_TARGETS_UP	5	493	2.5	0.0902019	0.0687605	AGT;TYMP;VEGFA;PLOD2;TNC
SWEET_LUNG_CANCER_KRAS_DN	3	220	3.2	0.0991466	0.0763917	FLT1;S100A9;VEGFA
